# Supplementary material for: Site-specific characterization and quantitation ofN-glycopeptides in PKM2 knockout breast cancer cells using DiLeu isobaric tags enabled by electron-transfer/higher-energy collision dissociation (EThcD)
Source: Royal Society of Chemistry journal article supplement (doi:10.1039/c8an00216a), 2018-01-01
Supplement: c8an00216a2.xlsx [file c8an00216a2.xlsx]

## Sheet: HILIC alone
Confidence	Annotated Sequence	Modifications	# PSMs	Master Protein Accessions	Positions in Master Proteins	# Missed Cleavages	Theo. MH+ [Da]	Glycan composition	Off By X	Position in Protein	|Log Prob| A2	Byonic Score A2	Delta Byonic Score A2	Delta Mod Score A2	PEP 2D A2	q-Value 2D A2	FDR 2D A2	Peptide Group FDR 2D A2	PEP 1D A2	q-Value 1D A2	FDR 1D A2	Peptide Group FDR 1D A2	Confidence A2
High	[K].AAIPSALDTNSSK.[S]	1xHexNAc(2)Hex(9) [N10]	1	Q08380	Q08380 [542-554]	0	3139.29	HexNAc(2)Hex(9)	0	542	8.43	512.3	350.8	350.8	3.6955e-09	5.51751e-10	0	0	8.03749e-06	1.2434e-06	0	0	High
High	[K].AAIPSALDTNSSK.[S]	1xHexNAc(5)Hex(6)Fuc(1)NeuAc(1) [N10]	1	Q08380	Q08380 [542-554]	0	3699.53	HexNAc(5)Hex(6)Fuc(1)NeuAc(1)	0	542	7.91	456.7	222	222	1.22628e-08	2.52774e-09	0	0	2.66704e-05	5.45839e-06	0	0	High
High	[K].AAIPSALDTNSSK.[S]	1xHexNAc(2)Hex(8) [N10]	1	Q08380	Q08380 [542-554]	0	2977.24	HexNAc(2)Hex(8)	0	542	6.75	391.6	266.9	266.9	1.7752e-07	3.06501e-08	0	0	0.000385952	6.80518e-05	0	0	High
High	[K].AAIPSALDTNSSK.[S]	1xHexNAc(6)Hex(7)Fuc(1)NeuAc(1) [N10]	1	Q08380	Q08380 [542-554]	0	4064.66	HexNAc(6)Hex(7)Fuc(1)NeuAc(1)	0	542	5.08	198.6	40.1	40.1	8.22534e-06	6.99233e-07	0	0	0.0175801	0.00682594	0.00645161	0.00716846	High
High	[K].AAIPSALDTNSSK.[S]	1xHexNAc(4)Hex(5)Fuc(1)NeuAc(2) [N10]	1	Q08380	Q08380 [542-554]	0	3625.49	HexNAc(4)Hex(5)Fuc(1)NeuAc(2)	0	542	3.86	161.1	24	24	0.000138551	7.25758e-06	0	0	0.229255	0.0242588	0.0235602	0.0264706	High
High	[K].AAIPSALDTNSSK.[S]	1xHexNAc(6)Hex(7)Fuc(1)NeuAc(2) [N10]	1	Q08380	Q08380 [542-554]	0	4355.75	HexNAc(6)Hex(7)Fuc(1)NeuAc(2)	0	542	4.35	137.4	51.5	51.5	4.49214e-05	3.82885e-06	0	0	0.187902	0.0228498	0.01	0.0111524	High
High	[K].AAIPSALDTNSSK.[S]	1xHexNAc(5)Hex(6)Fuc(1)NeuAc(2) [N10]	2	Q08380	Q08380 [542-554]	0	3990.62	HexNAc(5)Hex(6)Fuc(1)NeuAc(2)	0	542	4.24	184.4	39.3	39.3	5.79299e-05	6.09645e-06	0	0	0.229729	0.0485238	0.0352941	0.0390879	High
High	[K].AFNSTLPTMAQMEK.[A]	1xHexNAc(5)Hex(6)Fuc(1)NeuAc(3) [N3]	2	P16070	P16070 [55-68]	0	4575.8	HexNAc(5)Hex(6)Fuc(1)NeuAc(3)	0	55	7.37	372.3	235.5	227.3	4.23238e-08	1.04853e-08	0	0	9.2044e-05	2.32997e-05	0	0	High
High	[K].AFNSTLPTMAQMEK.[A]	1xOxidation [M12]; 1xHexNAc(4)Hex(5)NeuAc(2) [N3]	1	P16070	P16070 [55-68]	0	3789.51	HexNAc(4)Hex(5)NeuAc(2)	0	55	6.83	326.6	63	34.8	1.49582e-07	2.67638e-08	0	0	0.00032523	5.94409e-05	0	0	High
High	[K].AFNSTLPTMAQMEK.[A]	1xHexNAc(5)Hex(6)NeuAc(3) [N3]	2	P16070	P16070 [55-68]	0	4429.74	HexNAc(5)Hex(6)NeuAc(3)	0	55	5.02	207.4	85.6	85.6	9.62934e-06	8.80051e-07	0	0	0.0205203	0.00949367	0.00934579	0.0103448	High
High	[K].AFNSTLPTMAQMEK.[A]	1xOxidation [M9]; 1xHexNAc(5)Hex(7)Fuc(1)NeuAc(2) [N3]	1	P16070	P16070 [55-68]	0	4462.76	HexNAc(5)Hex(7)Fuc(1)NeuAc(2)	1	55	3.86	101.6	17.4	0	0.000138551	8.33376e-06	0	0	0.229255	0.026178	0.0258398	0.0289855	High
High	[K].AFNSTLPTMAQMEK.[A]	1xHexNAc(5)Hex(6)Fuc(1)NeuAc(2) [N3]	1	P16070	P16070 [55-68]	0	4284.71	HexNAc(5)Hex(6)Fuc(1)NeuAc(2)	1	55	3.63	166.6	18.4	18.4	0.000236365	1.56062e-05	0	0	0.336056	0.0493827	0.0478469	0.0509383	High
High	[K].AFNSTLPTMAQMEK.[A]	1xHexNAc(6)Hex(7)NeuAc(3) [N3]; 1xOxidation [M12]	1	P16070	P16070 [55-68]	0	4810.87	HexNAc(6)Hex(7)NeuAc(3)	1	55	3.44	73.1	11.8	0	0.000363867	2.56293e-05	0	0	0.438273	0.0709534	0.0694143	0.0748792	High
High	[K].AFNSTLPTMAQMEK.[A]	1xOxidation [M9]; 1xHexNAc(5)Hex(6)NeuAc(2) [N3]	2	P16070	P16070 [55-68]	0	4154.64	HexNAc(5)Hex(6)NeuAc(2)	1	55	2.82	138.7	18.3	0	0.00152289	0.00232558	0.00230415	0.00273224	0.764362	0.148148	0.147157	0.158672	High
High	[K].AFNSTLPTMAQMEK.[A]	1xOxidation [M12]; 1xHexNAc(6)Hex(7)Fuc(1)NeuAc(3) [N3]	1	P16070	P16070 [55-68]	0	4956.93	HexNAc(6)Hex(7)Fuc(1)NeuAc(3)	1	55	2.37	133.4	28.7	13.5	0.00422017	0.00232558	0.0021692	0.00257069	0.899297	0.271447	0.270992	0.28769	High
High	[K].AFNSTLPTMAQMEK.[A]	1xHexNAc(7)Hex(8)NeuAc(1) [N3]; 1xOxidation [M]	2	P16070	P16070 [55-68]	0	4593.81	HexNAc(7)Hex(8)NeuAc(1)	0	55	4.34	105.5	12.9	0	4.53957e-05	4.41021e-06	0	0	0.189503	0.0310817	0.0192308	0.0213523	High
High	[K].AFNSTLPTMAQMEK.[A]	1xHexNAc(4)Hex(5)Fuc(1)NeuAc(2) [N3]; 1xOxidation [M9]	2	P16070	P16070 [55-68]	0	3935.57	HexNAc(4)Hex(5)Fuc(1)NeuAc(2)	0	55	4.31	141.4	31.1	0	4.88388e-05	5.44299e-06	0	0	0.20094	0.0445209	0.033033	0.0365448	High
High	[K].AFSWSANLTR.[H]	1xHexNAc(4)Hex(5)Fuc(1)NeuAc(2) [N7]	1	Q96JC4	Q96JC4 [249-258]	0	3503.41	HexNAc(4)Hex(5)Fuc(1)NeuAc(2)	0	249	6.19	275.2	10.5	10.5	6.42229e-07	5.98983e-08	0	0	0.00331788	0.000314647	0	0	High
High	[K].ANMDNGNATDINDNR.[S]	1xHexNAc(5)Hex(3)Fuc(1)NeuAc(1) [N14]	1	Q12840	Q12840 [993-1007]	0	3573.39	HexNAc(5)Hex(3)Fuc(1)NeuAc(1)	0	993	1.51	202	62.6	21.7	0.0305654	0.00699301	0.00696056	0.00840336	0.0763895	0.00800005	0.00377358	0.00420168	High
High	[K].ANTTQPGIVEGGQVLK.[C]	1xHexNAc(2)Hex(8) [N2]	1	P06756	P06756 [73-88]	0	3314.45	HexNAc(2)Hex(8)	0	73	7.58	421	264.5	264.5	2.64846e-08	6.35269e-09	0	0	5.75996e-05	1.40816e-05	0	0	High
High	[K].ANTTQPGIVEGGQVLK.[C]	1xHexNAc(5)Hex(6)Fuc(1)NeuAc(1) [N2]	1	P06756	P06756 [73-88]	0	4036.74	HexNAc(5)Hex(6)Fuc(1)NeuAc(1)	0	73	4.27	163.8	53.2	53.2	5.38611e-05	2.67721e-06	0	0	0.104232	0.0151515	0.0138504	0.0154799	High
High	[K].CCGAANYTDWEK.[I]	2xCarbamidomethyl [C1; C2]; 1xHexNAc(5)Hex(6)Fuc(1)NeuAc(2) [N6]	1	P08962	P08962 [145-156]	0	4190.54	HexNAc(5)Hex(6)Fuc(1)NeuAc(2)	0	145	7.5	353.8	170.7	170.7	3.19281e-08	8.1645e-09	0	0	6.94375e-05	1.81298e-05	0	0	High
High	[K].CCGAANYTDWEK.[I]	2xCarbamidomethyl [C1; C2]; 1xHexNAc(7)Hex(8)Fuc(1)NeuAc(2) [N6]	1	P08962	P08962 [145-156]	0	4920.8	HexNAc(7)Hex(8)Fuc(1)NeuAc(2)	1	145	7.1	235.1	123.8	42.9	7.91623e-08	1.51323e-08	0	0	0.000172145	3.36276e-05	0	0	High
High	[K].CCGAANYTDWEK.[I]	2xCarbamidomethyl [C1; C2]; 1xHexNAc(5)Hex(6)Fuc(1)NeuAc(1) [N6]	1	P08962	P08962 [145-156]	0	3899.44	HexNAc(5)Hex(6)Fuc(1)NeuAc(1)	0	145	3.57	156.2	18	18	0.000267663	1.87963e-05	0	0	0.364217	0.0638298	0.062937	0.0678851	High
High	[K].CCGAANYTDWEK.[I]	2xCarbamidomethyl [C1; C2]; 1xHexNAc(4)Hex(5)Fuc(1)NeuAc(1) [N6]	1	P08962	P08962 [145-156]	0	3534.31	HexNAc(4)Hex(5)Fuc(1)NeuAc(1)	0	145	5.12	191.9	44.5	44.5	7.50963e-06	6.98171e-07	0	0	0.0374928	0.0042689	0	0	High
High	[K].CCGAANYTDWEK.[I]	2xCarbamidomethyl [C1; C2]; 1xHexNAc(8)Hex(9)Fuc(1) [N6]	1	P08962	P08962 [145-156]	0	4703.74	HexNAc(8)Hex(9)Fuc(1)	0	145	4.99	192.4	71.5	71.5	1.01459e-05	8.38214e-07	0	0	0.0500097	0.00527579	0.00395257	0.00438596	High
High	[K].CCGAANYTDWEK.[I]	2xCarbamidomethyl [C1; C2]; 1xHexNAc(9)Hex(10)Fuc(1) [N6]	1	P08962	P08962 [145-156]	0	5068.87	HexNAc(9)Hex(10)Fuc(1)	0	145	4.21	58.2	13	13	6.12137e-05	6.81615e-06	0	0	0.23963	0.0568189	0.0487106	0.0541401	High
High	[K].CHAGYIGDNCNCSTDISTCR.[G]	4xCarbamidomethyl [C1; C10; C12; C19]; 1xHexNAc(2)Hex(8) [N11]	2	P18084	P18084 [576-595]	0	4063.49	HexNAc(2)Hex(8)	0	576	8.95	464	370.6	85	1.12503e-09	1.99748e-10	0	0	2.44689e-06	4.52866e-07	0	0	High
High	[K].CHAGYIGDNCNCSTDISTCR.[G]	4xCarbamidomethyl [C1; C10; C12; C19]; 1xHexNAc(4)Hex(5)NeuAc(1) [N11]	1	P18084	P18084 [576-595]	0	4274.59	HexNAc(4)Hex(5)NeuAc(1)	0	576	3.84	114.8	19.5	19.5	0.000143469	9.7548e-06	0	0	0.235449	0.026178	0.0255754	0.0287356	High
High	[K].CHEGNGTFECGACR.[C]	3xCarbamidomethyl [C1; C10; C13]; 1xHexNAc(6)Hex(7)NeuAc(2) [N5]	1	P05556	P05556 [477-490]	0	4589.65	HexNAc(6)Hex(7)NeuAc(2)	0	477	9.28	540	394.9	394.9	5.25518e-10	7.95615e-11	0	0	1.14298e-06	1.80894e-07	0	0	High
High	[K].CHEGNGTFECGACR.[C]	3xCarbamidomethyl [C1; C10; C13]; 1xHexNAc(2)Hex(9) [N5]	1	P05556	P05556 [477-490]	0	3519.25	HexNAc(2)Hex(9)	0	477	7.76	305.7	241.4	241.4	1.7259e-08	6.31981e-09	0	0	8.94461e-05	3.33553e-05	0	0	High
High	[K].CSSTPDNLSR.[T]	1xCarbamidomethyl [C1]; 1xHexNAc(4)Hex(7)NeuAc(1) [N7]	1	Q5T5Y3	Q5T5Y3 [1386-1395]	0	3374.28	HexNAc(4)Hex(7)NeuAc(1)	0	1386	1.83	170.5	36.7	36.7	0.0146516	0.00828157	0.00826446	0.00982801	0.0244116	0.0123077	0.0121951	0.0135135	High
High	[K].CVNASR.[C]	1xHexNAc(4)Hex(5)Fuc(1)NeuAc(2) [N3]; 1xCarbamidomethyl [C1]	1	P21589	P21589 [51-56]	0	3057.16	HexNAc(4)Hex(5)Fuc(1)NeuAc(2)	0	51	3.42	180.5	11.7	11.7	0.000383689	3.17003e-05	0	0	0.451867	0.0709534	0.0696202	0.0751174	High
High	[K].DIENQTVLK.[D]	1xHexNAc(6)Hex(5)Fuc(1)NeuAc(2) [N4]	1	Q8WZ42	Q8WZ42 [9588-9596]	0	3816.56	HexNAc(6)Hex(5)Fuc(1)NeuAc(2)	0	9588	1.8	65.4	3.3	3.3	0.0158563	0.00485437	0.0047619	0.00573066	0.987057	0.989617	0.444874	0.474174	High
High	[K].DLDTDFTNNASQPETK.[A]	1xHexNAc(4)Hex(5)Fuc(1)NeuAc(1) [N9]	1	O75976	O75976 [1062-1077]	0	3855.53	HexNAc(4)Hex(5)Fuc(1)NeuAc(1)	0	1062	7.69	323	190.8	190.8	2.06432e-08	4.67449e-09	0	0	4.4896e-05	1.03161e-05	0	0	High
High	[K].DLDTDFTNNASQPETK.[A]	1xHexNAc(4)Hex(5)Fuc(1)NeuAc(2) [N9]	1	O75976	O75976 [1062-1077]	0	4146.63	HexNAc(4)Hex(5)Fuc(1)NeuAc(2)	0	1062	5.08	194.7	55.8	55.8	8.22534e-06	7.2351e-07	0	0	0.0175801	0.00682594	0.00643087	0.00714285	High
High	[K].DLDTDFTNNASQPETK.[A]	1xHexNAc(4)Hex(5)Fuc(1) [N9]	1	O75976	O75976 [1062-1077]	0	3564.44	HexNAc(4)Hex(5)Fuc(1)	0	1062	3.63	130	34.1	34.1	0.000236365	1.38588e-05	0	0	0.336056	0.0493827	0.0484261	0.0514905	High
High	[K].DNTTVTR.[L]	1xHexNAc(5)Hex(6)Fuc(1)NeuAc(2) [N2]	1	P11279	P11279 [248-254]	0	3522.36	HexNAc(5)Hex(6)Fuc(1)NeuAc(2)	0	248	6.24	266.9	46.2	46.2	5.74766e-07	7.34703e-08	0	0	0.00124855	0.000160018	0	0	High
High	[K].DNTTVTR.[L]	1xHexNAc(4)Hex(5)Fuc(1)NeuAc(1) [N2]	1	P11279	P11279 [248-254]	0	2866.14	HexNAc(4)Hex(5)Fuc(1)NeuAc(1)	0	248	5.51	263	62.7	62.7	3.05872e-06	2.17508e-07	0	0	0.0066093	0.00378788	0.00361011	0.00398406	High
High	[K].DNTTVTR.[L]	1xHexNAc(5)Hex(6)Fuc(1)NeuAc(1) [N2]	2	P11279	P11279 [248-254]	0	3231.27	HexNAc(5)Hex(6)Fuc(1)NeuAc(1)	0	248	4.65	249.3	35.3	35.3	2.25254e-05	1.72133e-06	0	0	0.0467377	0.0151515	0.0144509	0.0161812	High
High	[K].DSGDYTITAENSSGSK.[S]	1xHexNAc(6)Hex(8)Fuc(1)NeuAc(1) [N11]	1	Q8WZ42	Q8WZ42 [20289-20304]	0	4583.76	HexNAc(6)Hex(8)Fuc(1)NeuAc(1)	1	20289	1.45	57.1	2.3	2.3	0.0357111	0.00928074	0.00925926	0.0111732	0.993823	1	0.478066	0.507136	High
High	[K].DTCTQECSYFNITK.[V]	2xCarbamidomethyl [C3; C7]; 1xHexNAc(4)Hex(5)Fuc(1)NeuAc(1) [N11]	2	P05556	P05556 [659-672]	0	3826.47	HexNAc(4)Hex(5)Fuc(1)NeuAc(1)	0	659	10.98	607.5	383	383	1.05375e-11	1.46438e-12	0	0	2.29185e-08	3.31734e-09	0	0	High
High	[K].DTCTQECSYFNITK.[V]	1xHexNAc(4)Hex(5)Fuc(1)NeuAc(2) [N11]; 2xCarbamidomethyl [C3; C7]	1	P05556	P05556 [659-672]	0	4117.57	HexNAc(4)Hex(5)Fuc(1)NeuAc(2)	0	659	7.91	477.2	266.6	86.2	1.23133e-08	2.61434e-09	0	0	2.67801e-05	5.65582e-06	0	0	High
High	[K].DTCTQECSYFNITK.[V]	2xCarbamidomethyl [C3; C7]; 1xHexNAc(5)Hex(6)Fuc(1)NeuAc(1) [N11]	1	P05556	P05556 [659-672]	0	4191.6	HexNAc(5)Hex(6)Fuc(1)NeuAc(1)	0	659	4.97	201.1	41.6	41.6	1.07943e-05	9.40945e-07	0	0	0.0229468	0.00949367	0.00923077	0.0102041	High
High	[K].DTCTQECSYFNITK.[V]	2xCarbamidomethyl [C3; C7]; 1xHexNAc(6)Hex(5)Fuc(1)NeuAc(1) [N11]	1	P05556	P05556 [659-672]	0	4232.63	HexNAc(6)Hex(5)Fuc(1)NeuAc(1)	0	659	2.81	145	78.4	67	0.00154477	0.00232558	0.00229885	0.00272479	0.766947	0.148829	0.147841	0.159341	High
High	[K].DTCTQECSYFNITK.[V]	1xHexNAc(5)Hex(6)Fuc(1)NeuAc(2) [N11]; 2xCarbamidomethyl [C3; C7]	1	P05556	P05556 [659-672]	0	4482.7	HexNAc(5)Hex(6)Fuc(1)NeuAc(2)	0	659	7.76	283.5	175.8	175.8	1.74102e-08	6.54386e-09	0	0	9.02297e-05	3.45401e-05	0	0	High
High	[K].DVECGEGHFCHDNQTCCR.[D]	1xDeamidated [Q14]; 4xCarbamidomethyl [C4; C10; C16; C17]; 1xHexNAc(2)Hex(9) [N13]	1	P28799	P28799 [518-535]	0	4146.45	HexNAc(2)Hex(9)	0	518	8.41	391.3	334.1	49.8	3.86655e-09	9.88049e-10	0	0	2.00401e-05	5.20259e-06	0	0	High
High	[K].EASQNITYICK.[N]	1xCarbamidomethyl [C10]; 1xHexNAc(2)Hex(9) [N5]	1	P05997	P05997 [1396-1406]	0	3191.27	HexNAc(2)Hex(9)	0	1396	7.45	239.4	89.2	89.2	3.58841e-08	1.0462e-08	0	0	0.000185955	5.52191e-05	0	0	High
High	[K].ENGTDTVQEEEESPAEGSK.[D]	1xHexNAc(2)Hex(6) [N2]	1	Q9Y4L1	Q9Y4L1 [595-613]	0	3414.33	HexNAc(2)Hex(6)	0	595	15.96	859.1	680.4	680.4	1.09895e-16	3.83265e-17	0	0	2.39017e-13	6.70799e-14	0	0	High
High	[K].ENGTDTVQEEEESPAEGSK.[D]	1xHexNAc(2)Hex(8) [N2]	1	Q9Y4L1	Q9Y4L1 [595-613]	0	3738.44	HexNAc(2)Hex(8)	0	595	11.08	602.2	444.6	444.6	8.30146e-12	1.0098e-12	0	0	1.80553e-08	2.27676e-09	0	0	High
High	[K].ENGTDTVQEEEESPAEGSK.[D]	1xHexNAc(2)Hex(5) [N2]	1	Q9Y4L1	Q9Y4L1 [595-613]	0	3252.28	HexNAc(2)Hex(5)	0	595	7.44	261.3	147.9	147.9	3.64e-08	8.83467e-09	0	0	7.91621e-05	1.96242e-05	0	0	High
High	[K].ENGTDTVQEEEESPAEGSK.[D]	1xHexNAc(6)Hex(4) [N2]	1	Q9Y4L1	Q9Y4L1 [595-613]	0	3902.54	HexNAc(6)Hex(4)	0	595	3.93	210.4	71	71	0.000117217	4.85488e-06	0	0	0.201176	0.0242588	0.0240642	0.0269461	High
High	[K].ENQNHSYSLK.[S]	1xHexNAc(2)Hex(8) [N4]	1	P06756	P06756 [942-951]	0	2922.15	HexNAc(2)Hex(8)	0	942	6.85	317.3	98.4	98.4	1.40177e-07	2.45219e-08	0	0	0.000304788	5.44719e-05	0	0	High
High	[K].ENQNHSYSLK.[S]	1xHexNAc(2)Hex(9) [N4]	1	P06756	P06756 [942-951]	0	3084.2	HexNAc(2)Hex(9)	0	942	4.45	208.9	70.6	70.6	3.57059e-05	3.14995e-06	0	0	0.155501	0.02072	0.0101351	0.0112782	High
High	[K].ENSSEICSNNGECVCGQCVCR.[K]	5xCarbamidomethyl [C7; C13; C15; C18; C20]; 1xHexNAc(2)Hex(8) [N2]	1	P05556	P05556 [519-539]	0	4221.53	HexNAc(2)Hex(8)	0	519	11.31	600.8	405.9	60.9	4.85932e-12	6.72193e-13	0	0	1.05688e-08	1.50029e-09	0	0	High
High	[K].ENSSEICSNNGECVCGQCVCR.[K]	5xCarbamidomethyl [C7; C13; C15; C18; C20]; 1xHexNAc(2)Hex(9) [N2]	1	P05556	P05556 [519-539]	0	4383.58	HexNAc(2)Hex(9)	0	519	5.82	194.6	87.5	87.4	1.49825e-06	1.14708e-07	0	0	0.00324821	0.000261764	0	0	High
High	[K].ENTSDPSLVIAFGR.[G]	1xHexNAc(7)Hex(8)NeuAc(1) [N2]	1	P11279	P11279 [83-96]	0	4514.83	HexNAc(7)Hex(8)NeuAc(1)	1	83	2.82	62.7	3.2	3.2	0.00151512	0.00232558	0.00230947	0.00273973	0.763431	0.148148	0.147404	0.158965	High
High	[K].ENTSDPSLVIAFGR.[G]	1xHexNAc(8)Hex(9) [N2]	1	P11279	P11279 [83-96]	0	4588.87	HexNAc(8)Hex(9)	1	83	2.31	90.6	15.5	15.5	0.00492373	0.00232558	0.00214592	0.00254453	0.912308	0.284818	0.282878	0.300539	High
High	[K].ENTSDPSLVIAFGR.[G]	1xHexNAc(5)Hex(6)Fuc(1)NeuAc(3) [N2]	1	P11279	P11279 [83-96]	0	4512.82	HexNAc(5)Hex(6)Fuc(1)NeuAc(3)	1	83	4.37	59.3	37.4	37.4	4.26956e-05	3.68262e-06	0	0	0.180305	0.0222978	0.0100334	0.011194	High
High	[K].ENTSDPSLVIAFGR.[G]	1xHexNAc(6)Hex(7)Fuc(1)NeuAc(2) [N2]	1	P11279	P11279 [83-96]	0	4586.85	HexNAc(6)Hex(7)Fuc(1)NeuAc(2)	0	83	3.71	61.5	1.6	1.6	0.000193081	1.28395e-05	0	0	0.496603	0.105052	0.0773067	0.086351	High
High	[K].GLNLTEDTYKPR.[I]	1xHexNAc(4)Hex(5)Fuc(1)NeuAc(2) [N3]	1	Q08380	Q08380 [396-407]	0	3757.56	HexNAc(4)Hex(5)Fuc(1)NeuAc(2)	0	396	5.57	235.6	21.7	21.7	2.71763e-06	1.88683e-07	0	0	0.00587653	0.00378788	0.00363636	0.00401606	High
High	[K].GLNLTEDTYKPR.[I]	1xHexNAc(5)Hex(6)Fuc(1)NeuAc(3) [N3]	1	Q08380	Q08380 [396-407]	0	4413.79	HexNAc(5)Hex(6)Fuc(1)NeuAc(3)	0	396	5.14	205.8	130	130	7.1862e-06	5.57877e-07	0	0	0.0153928	0.00682594	0.00660066	0.00729927	High
High	[K].GLNLTEDTYKPR.[I]	1xHexNAc(7)Hex(8)NeuAc(1) [N3]	1	Q08380	Q08380 [396-407]	0	4415.8	HexNAc(7)Hex(8)NeuAc(1)	0	396	4.83	197.3	49.4	49.4	1.47438e-05	1.29294e-06	0	0	0.0310859	0.0151515	0.0148809	0.0165563	High
High	[K].GLNLTEDTYKPR.[I]	1xHexNAc(6)Hex(7)Fuc(1)NeuAc(4) [N3]	1	Q08380	Q08380 [396-407]	0	5070.01	HexNAc(6)Hex(7)Fuc(1)NeuAc(4)	0	396	7.38	306.8	161.8	161.8	4.19424e-08	1.33509e-08	0	0	0.000217343	7.0418e-05	0	0	High
High	[K].GQTEIQVNCPPAVTENK.[T]	1xCarbamidomethyl [C9]; 1xHexNAc(2)Hex(7) [N16]	1	Q16563	Q16563 [56-72]	0	3425.44	HexNAc(2)Hex(7)	0	56	13.08	707.1	523.1	523.1	8.30146e-14	1.2677e-14	0	0	1.80553e-10	2.90908e-11	0	0	High
High	[K].GQTEIQVNCPPAVTENK.[T]	1xHexNAc(3)Hex(6)NeuAc(1) [N16]; 1xCarbamidomethyl [C9]	2	Q16563	Q16563 [56-72]	0	3757.56	HexNAc(3)Hex(6)NeuAc(1)	0	56	13.08	716.4	486.6	486.6	8.30146e-14	1.61938e-14	0	0	1.80553e-10	3.70625e-11	0	0	High
High	[K].GQTEIQVNCPPAVTENK.[T]	1xCarbamidomethyl [C9]; 1xHexNAc(2)Hex(8) [N16]	1	Q16563	Q16563 [56-72]	0	3587.49	HexNAc(2)Hex(8)	0	56	8.29	495.3	364.1	364.1	5.13827e-09	7.30897e-10	0	0	1.11754e-05	1.56179e-06	0	0	High
High	[K].GQTEIQVNCPPAVTENK.[T]	1xCarbamidomethyl [C9]; 1xHexNAc(2)Hex(9) [N16]	1	Q16563	Q16563 [56-72]	0	3749.55	HexNAc(2)Hex(9)	0	56	8.26	491.3	323.3	323.3	5.53013e-09	8.34603e-10	0	0	1.20277e-05	1.79848e-06	0	0	High
High	[K].GQTEIQVNCPPAVTENK.[T]	1xCarbamidomethyl [C9]; 1xHexNAc(2)Hex(6) [N16]	1	Q16563	Q16563 [56-72]	0	3263.39	HexNAc(2)Hex(6)	0	56	9.25	562.8	407.5	407.5	5.65283e-10	9.0054e-11	0	0	2.92988e-06	4.64822e-07	0	0	High
High	[K].GSLSYLNVTR.[K]	1xHexNAc(1) [N7]	1	P07339	P07339 [257-266]	0	1312.67	HexNAc(1)	0	257	7.15	447	267.1	267.1	7.02782e-08	1.41674e-08	0	0	0.000152829	3.14834e-05	0	0	High
High	[K].GSLSYLNVTR.[K]	1xHexNAc(2)Rev1 [N7]	1	P07339	P07339 [257-266]	0	1515.75	HexNAc(2)	0	257	6.45	272.6	154.1	154.1	3.5336e-07	5.5389e-08	0	0	0.000767961	0.000122788	0	0	High
High	[K].GSLSYLNVTR.[K]	1xHexNAc(2)Hex(7) [N7]	1	P07339	P07339 [257-266]	0	2650.12	HexNAc(2)Hex(7)	0	257	4.14	83.3	63.5	63.5	7.31207e-05	2.87905e-06	0	0	0.136108	0.0192837	0.0191781	0.0214067	High
High	[K].GSLSYLNVTR.[K]	1xHexNAc(2)Hex(8) [N7]	1	P07339	P07339 [257-266]	0	2812.18	HexNAc(2)Hex(8)	0	257	2.8	118.7	6.2	6.2	0.00157355	0.00232558	0.00228833	0.00271003	0.770264	0.164251	0.163462	0.176367	High
High	[K].GSLSYLNVTR.[K]	1xHexNAc(2)Hex(9) [N7]	1	P07339	P07339 [257-266]	0	2974.23	HexNAc(2)Hex(9)	0	257	2.91	127.3	28.1	28.1	0.00124159	5.02562e-05	0	0	0.861695	0.24968	0.156863	0.173913	High
High	[K].GSLSYLNVTR.[K]	1xHexNAc(3)Hex(5)NeuAc(1) [N7]	1	P07339	P07339 [257-266]	0	2820.19	HexNAc(3)Hex(5)NeuAc(1)	0	257	1.88	66.4	9.6	9.6	0.0130946	0.00250627	0.00246914	0.00296736	0.98451	0.93845	0.428422	0.45852	High
High	[K].GSLSYLNVTR.[K]	1xHexNAc(4)Hex(4)NeuAc(1) [N7]	1	P07339	P07339 [257-266]	0	2861.22	HexNAc(4)Hex(4)NeuAc(1)	0	257	1.88	63.1	2.9	2.9	0.0130946	0.00250627	0.00246305	0.00295858	0.98451	0.938498	0.427975	0.458007	High
High	[K].GYPCGGNK.[T]	1xCarbamidomethyl [C4]; 1xHexNAc(4)Hex(5)Fuc(1)NeuAc(1) [N7]	1	P11717	P11717 [2079-2086]	0	2912.1	HexNAc(4)Hex(5)Fuc(1)NeuAc(1)	0	2079	6.54	249.1	73.7	73.7	2.86503e-07	4.57128e-08	0	0	0.00062275	0.000101397	0	0	High
High	[K].GYPCGGNK.[T]	1xHexNAc(4)Hex(5)Fuc(1)NeuAc(2) [N7]; 1xCarbamidomethyl [C4]	2	P11717	P11717 [2079-2086]	0	3203.2	HexNAc(4)Hex(5)Fuc(1)NeuAc(2)	0	2079	6.42	234.5	73	73	3.79159e-07	5.79961e-08	0	0	0.000823985	0.000128551	0	0	High
High	[K].HLLENSTASVSEAER.[K]	1xHexNAc(2)Hex(8) [N5]	1	P42892	P42892 [162-176]	0	3345.38	HexNAc(2)Hex(8)	0	162	5.8	198	82.9	82.9	1.58738e-06	1.28309e-07	0	0	0.00816165	0.000671984	0	0	High
High	[K].HNNDTQHIWESDSNEFSVIADPR.[G]	1xHexNAc(2)Hex(7) [N3]	1	P14625	P14625 [215-237]	0	4251.74	HexNAc(2)Hex(7)	0	215	5.3	194.4	139.5	139.5	5.0295e-06	3.32797e-07	0	0	0.0108224	0.00378788	0.00346021	0.00383142	High
High	[K].HNNDTQHIWESDSNEFSVIADPR.[G]	1xHexNAc(2)Hex(6) [N3]	1	P14625	P14625 [215-237]	0	4089.68	HexNAc(2)Hex(6)	0	215	2.86	159.1	80.6	39	0.00139626	0.00232558	0.00232019	0.00275482	0.748224	0.133449	0.132988	0.14313	High
High	[K].HNNDTQHIWESDSNEFSVIADPR.[G]	1xDeamidated [N14]; 1xHexNAc(6)Hex(3) [N3]	1	P14625	P14625 [215-237]	0	4416.83	HexNAc(6)Hex(3)	1	215	2.7	145	67	42.1	0.00198456	0.00232558	0.00224719	0.00266667	0.808565	0.194903	0.19432	0.204918	High
High	[K].HQGAWYVWNR.[T]	1xHexNAc(6)Hex(7)NeuAc(4) [N9]	1	P09923	P09923 [260-269]	0	4833.86	HexNAc(6)Hex(7)NeuAc(4)	1	260	2.6	55.9	7	7	0.00253558	0.00232558	0.00221729	0.00263852	0.843462	0.207602	0.206647	0.218354	High
High	[K].HTNMNLTQLK.[V]	1xHexNAc(2)Hex(8) [N5]	1	Q15165	Q15165 [250-259]	0	2902.2	HexNAc(2)Hex(8)	0	250	7.33	324.9	127	127	4.65103e-08	1.16325e-08	0	0	0.000101148	2.58498e-05	0	0	High
High	[K].IDSTGNVTNELR.[V]	1xHexNAc(2)Hex(9) [N6]	1	O75882	O75882 [411-422]	0	3183.29	HexNAc(2)Hex(9)	0	411	1.95	176.4	61.3	61.3	0.0112531	0.00250627	0.0025	0.00301205	0.0374928	0.00399879	0	0	High
High	[K].IISNASCTTNCLAPLAK.[V]	2xCarbamidomethyl [C7; C11]; 1xHexNAc(5)Hex(4)NeuAc(1) [N4]	1	P04406	P04406 [146-162]	0	3788.62	HexNAc(5)Hex(4)NeuAc(1)	0	146	3.42	85.8	6.6	6.6	0.000381144	2.99448e-05	0	0	0.450157	0.0709534	0.0680851	0.0734597	High
High	[K].ILNGSNK.[K]	1xHexNAc(4)Hex(5)Fuc(1)NeuAc(1) [N3]	1	Q9UBV2	Q9UBV2 [193-199]	0	2805.16	HexNAc(4)Hex(5)Fuc(1)NeuAc(1)	0	193	2.82	202.6	2.3	2.3	0.00152529	0.000103488	0	0	0.884112	0.383378	0.215953	0.237687	High
High	[K].ISSLQTTEKNDTVAGQGER.[D]	1xHexNAc(5)Hex(6)Fuc(1)NeuAc(2) [N10]	1	P06756	P06756 [865-883]	1	4749.97	HexNAc(5)Hex(6)Fuc(1)NeuAc(2)	1	865	5.7	246.3	179	55.4	2.01582e-06	1.4659e-07	0	0	0.00436547	0.00378788	0.00371747	0.00411522	High
High	[K].ISSLQTTEKNDTVAGQGER.[D]	1xHexNAc(6)Hex(7)Fuc(1) [N10]	1	P06756	P06756 [865-883]	1	4532.91	HexNAc(6)Hex(7)Fuc(1)	1	865	2.82	189.6	151.1	97.5	0.00150008	0.00232558	0.00231481	0.00274725	0.761606	0.147458	0.146959	0.158582	High
High	[K].ISSLQTTEKNDTVAGQGER.[D]	1xDeamidated [Q16]; 1xHexNAc(6)Hex(7)Fuc(1)NeuAc(3) [N10]	1	P06756	P06756 [865-883]	1	5407.18	HexNAc(6)Hex(7)Fuc(1)NeuAc(3)	1	865	2.21	230.5	167.1	126.9	0.00611009	0.00232558	0.00213675	0.00253164	0.927942	0.294762	0.293833	0.311927	High
High	[K].KAAQEQVLNASR.[A]	1xDeamidated [Q4]; 1xHexNAc(5)Hex(6)NeuAc(1) [N9]	1	Q99543	Q99543 [607-618]	1	3594.51	HexNAc(5)Hex(6)NeuAc(1)	0	607	2.93	233.9	44.9	44.9	0.00118378	6.13877e-05	0	0	0.00295742	0.000239602	0	0	High
High	[K].KDTCTQECSYFNITK.[V]	2xCarbamidomethyl [C4; C8]; 1xHexNAc(4)Hex(5)Fuc(1)NeuAc(1) [N12]	1	P05556	P05556 [658-672]	1	3954.57	HexNAc(4)Hex(5)Fuc(1)NeuAc(1)	0	658	8.17	505.5	329.8	329.8	6.82573e-09	1.12163e-09	0	0	1.48454e-05	2.45109e-06	0	0	High
High	[K].KDTCTQECSYFNITK.[V]	1xHexNAc(4)Hex(5)Fuc(1)NeuAc(2) [N12]; 2xCarbamidomethyl [C4; C8]	2	P05556	P05556 [658-672]	1	4245.66	HexNAc(4)Hex(5)Fuc(1)NeuAc(2)	0	658	7.94	428.7	308.4	72.6	1.14058e-08	2.08481e-09	0	0	2.48064e-05	4.44592e-06	0	0	High
High	[K].KDTCTQECSYFNITK.[V]	2xCarbamidomethyl [C4; C8]; 1xHexNAc(5)Hex(6)Fuc(1)NeuAc(2) [N12]	1	P05556	P05556 [658-672]	1	4610.79	HexNAc(5)Hex(6)Fuc(1)NeuAc(2)	0	658	7.93	473.5	216	216	1.16974e-08	2.17381e-09	0	0	2.54406e-05	4.64975e-06	0	0	High
High	[K].KDTCTQECSYFNITK.[V]	2xCarbamidomethyl [C4; C8]; 1xHexNAc(6)Hex(7)Fuc(1)NeuAc(1) [N12]	1	P05556	P05556 [658-672]	1	4684.83	HexNAc(6)Hex(7)Fuc(1)NeuAc(1)	0	658	7.61	339.8	259.3	259.3	2.46225e-08	5.79296e-09	0	0	5.35499e-05	1.28275e-05	0	0	High
High	[K].KDTCTQECSYFNITK.[V]	2xCarbamidomethyl [C4; C8]; 1xHexNAc(5)Hex(6)Fuc(1)NeuAc(1) [N12]	1	P05556	P05556 [658-672]	1	4319.7	HexNAc(5)Hex(6)Fuc(1)NeuAc(1)	0	658	3.47	105.7	31.2	31.2	0.000342272	2.3947e-05	0	0	0.422706	0.0638298	0.0612245	0.0659898	High
High	[K].KDTCTQECSYFNITK.[V]	2xCarbamidomethyl [C4; C8]; 1xHexNAc(4)Hex(5)NeuAc(2) [N12]	1	P05556	P05556 [658-672]	1	4099.6	HexNAc(4)Hex(5)NeuAc(2)	1	658	3.34	72.6	9	9	0.000461059	4.41167e-05	0	0	0.49771	0.0862745	0.0847784	0.0924731	High
High	[K].KDTCTQECSYFNITK.[V]	2xCarbamidomethyl [C4; C8]; 1xHexNAc(2)Hex(9) [N12]	1	P05556	P05556 [658-672]	1	3759.47	HexNAc(2)Hex(9)	0	658	6.94	254.2	132.8	132.8	1.15859e-07	2.37691e-08	0	0	0.000600148	0.000125114	0	0	High
High	[K].KDTCTQECSYFNITK.[V]	2xCarbamidomethyl [C4; C8]; 1xHexNAc(6)Hex(7)Fuc(1)NeuAc(3) [N12]	1	P05556	P05556 [658-672]	1	5267.02	HexNAc(6)Hex(7)Fuc(1)NeuAc(3)	0	658	6.16	223.3	187.3	142	6.96688e-07	6.31307e-08	0	0	0.00359823	0.000331573	0	0	High
High	[K].KDTCTQECSYFNITKVESR.[D]	2xCarbamidomethyl [C4; C8]; 1xHexNAc(4)Hex(3)NeuAc(1) [N12]	1	P05556	P05556 [658-676]	2	3955.65	HexNAc(4)Hex(3)NeuAc(1)	0	658	2.76	203.1	91	91	0.00173184	0.00016246	0	0	0.896449	0.528315	0.269682	0.295413	High
High	[K].LDNYSTQELGK.[T]	1xHexNAc(4)Hex(5)Fuc(1)NeuAc(1) [N3]	1	P21589	P21589 [331-341]	0	3327.35	HexNAc(4)Hex(5)Fuc(1)NeuAc(1)	0	331	7.78	477.2	202.3	202.3	1.65374e-08	3.87428e-09	0	0	3.59668e-05	8.5125e-06	0	0	High
High	[K].LDNYSTQELGK.[T]	1xHexNAc(5)Hex(6)Fuc(1)NeuAc(1) [N3]	1	P21589	P21589 [331-341]	0	3692.48	HexNAc(5)Hex(6)Fuc(1)NeuAc(1)	0	331	6.76	336.6	64.4	64.4	1.74756e-07	2.99794e-08	0	0	0.000379944	6.65663e-05	0	0	High
High	[K].LDNYSTQELGK.[T]	1xHexNAc(4)Hex(5)Fuc(1)NeuAc(2) [N3]	1	P21589	P21589 [331-341]	0	3618.45	HexNAc(4)Hex(5)Fuc(1)NeuAc(2)	0	331	6.01	260.8	44.4	44.4	9.81093e-07	8.86208e-08	0	0	0.00212936	0.000193672	0	0	High
High	[K].LGIYADVGNK.[T]	1xHexNAc(4)Hex(5)Fuc(1)NeuAc(2) [N9]	1	P06280	P06280 [131-140]	0	3400.39	HexNAc(4)Hex(5)Fuc(1)NeuAc(2)	0	131	7.21	283.1	123.1	103.9	6.19133e-08	1.32864e-08	0	0	0.000134641	2.95255e-05	0	0	High
High	[K].LIDNNK.[T]	1xHexNAc(2)Hex(4) [N5]	1	P07602	P07602 [328-333]	0	1770.76	HexNAc(2)Hex(4)	0	328	4.74	356.1	14.7	14.7	1.82365e-05	1.60449e-06	0	0	0.038173	0.0151515	0.0145773	0.0163399	High
High	[K].LIDNNK.[T]	1xHexNAc(5)Hex(6)Fuc(1)NeuAc(3) [N5]	1	P07602	P07602 [328-333]	0	3723.45	HexNAc(5)Hex(6)Fuc(1)NeuAc(3)	0	328	2.82	191.5	0	0	0.00152529	7.87611e-05	0	0	0.884112	0.336942	0.196755	0.217489	High
High	[K].LIDNNKTEK.[E]	1xHexNAc(4)Hex(5)Fuc(1)NeuAc(2) [N5]	1	P07602	P07602 [328-336]	1	3425.41	HexNAc(4)Hex(5)Fuc(1)NeuAc(2)	0	328	4	255.4	2.1	2.1	0.000100572	1.01666e-05	0	0	0.340843	0.0818725	0.0623376	0.0697674	High
High	[K].LNVSTK.[L]	1xHexNAc(11)Hex(11)NeuAc(1) [N2]	1	P35749	P35749 [1332-1337]	0	4968.94	HexNAc(11)Hex(11)NeuAc(1)	0	1332	1.8	56.5	0.7	0.7	0.0158563	0.00485437	0.00473934	0.005698	0.987057	0.99434	0.446686	0.475897	High
High	[K].MCLNR.[T]	1xCarbamidomethyl [C2]; 1xHexNAc(6)Hex(7)NeuAc(1) [N4]	1	Q13510	Q13510 [339-343]	0	3337.26	HexNAc(6)Hex(7)NeuAc(1)	0	339	2.23	83.8	2.6	2.6	0.00592214	0.00037154	0	0	0.967003	0.763468	0.362338	0.394068	High
High	[K].MCLNR.[T]	1xCarbamidomethyl [C2]; 1xHexNAc(7)Hex(8)Fuc(1)NeuAc(3) [N4]	1	Q13510	Q13510 [339-343]	0	4430.64	HexNAc(7)Hex(8)Fuc(1)NeuAc(3)	0	339	1.31	62	7.4	7.4	0.0488482	0.00928074	0.00911162	0.0110803	0.995285	1	0.480141	0.509381	High
High	[K].MCLNR.[T]	1xCarbamidomethyl [C2]; 1xHexNAc(6)Hex(9)Fuc(1)NeuAc(2) [N4]	2	Q13510	Q13510 [339-343]	0	4098.52	HexNAc(6)Hex(9)Fuc(1)NeuAc(2)	0	339	1.15	87.6	4.4	4.4	0.0713587	0.00928074	0.00863931	0.0104987	0.996723	1	0.502239	0.528763	High
High	[K].MNFTGGDTCHK.[V]	1xCarbamidomethyl [C9]; 1xHexNAc(2)Hex(9) [N2]	1	P11717	P11717 [1311-1321]	0	3132.15	HexNAc(2)Hex(9)	0	1311	7.42	311.2	199.7	199.7	3.78333e-08	9.18228e-09	0	0	8.22791e-05	2.03988e-05	0	0	High
High	[K].MNFTGGDTCHK.[V]	1xCarbamidomethyl [C9]; 1xHexNAc(2)Hex(8) [N2]	1	P11717	P11717 [1311-1321]	0	2970.1	HexNAc(2)Hex(8)	0	1311	7.81	304.3	132.9	132.9	1.53692e-08	5.52536e-09	0	0	7.96532e-05	2.91444e-05	0	0	High
High	[K].NANGSYTCEECDSSCVGCTGEGPGNCK.[E]	5xCarbamidomethyl [C8; C11; C15; C18; C26]; 1xHexNAc(2)Hex(6) [N3]	1	Q6UXH1	Q6UXH1 [249-275]	0	4348.55	HexNAc(2)Hex(6)	0	249	6.92	355.3	278.9	72.5	1.21555e-07	2.1305e-08	0	0	0.000264307	4.73363e-05	0	0	High
High	[K].NATLAEQAK.[L]	1xHexNAc(2)Hex(7) [N1]	1	Q9Y4L1	Q9Y4L1 [869-877]	0	2486.03	HexNAc(2)Hex(7)	0	869	7.62	352.6	178.8	178.8	2.4119e-08	5.65941e-09	0	0	5.24551e-05	1.25281e-05	0	0	High
High	[K].NATLAEQAK.[L]	1xHexNAc(2)Hex(9) [N1]	1	Q9Y4L1	Q9Y4L1 [869-877]	0	2810.13	HexNAc(2)Hex(9)	0	869	7.5	390.6	167.7	167.7	3.17671e-08	7.86007e-09	0	0	6.90874e-05	1.74508e-05	0	0	High
High	[K].NATLAEQAK.[L]	1xHexNAc(2)Hex(8) [N1]	1	Q9Y4L1	Q9Y4L1 [869-877]	0	2648.08	HexNAc(2)Hex(8)	0	869	7.37	355.3	155.7	155.7	4.25136e-08	1.06715e-08	0	0	9.24568e-05	2.37139e-05	0	0	High
High	[K].NATLAEQAK.[L]	1xHexNAc(7)Hex(7)Fuc(1)NeuAc(2) [N1]	1	Q9Y4L1	Q9Y4L1 [869-877]	0	4229.67	HexNAc(7)Hex(7)Fuc(1)NeuAc(2)	-1	869	1.28	47.3	25.1	25.1	0.052426	0.00928074	0.00896861	0.0108696	0.995561	1	0.488722	0.51773	High
High	[K].NATSYPPMCTQDPK.[A]	1xCarbamidomethyl [C9]; 1xHexNAc(2)Hex(9) [N1]	1	P23141	P23141 [79-92]	0	3474.33	HexNAc(2)Hex(9)	0	79	7.67	316.8	224	224	2.13808e-08	5.15582e-09	0	0	4.65001e-05	1.1398e-05	0	0	High
High	[K].NGSLFAFR.[G]	1xHexNAc(3)Hex(6)NeuAc(1) [N1]	1	P04004	P04004 [169-176]	0	2784.12	HexNAc(3)Hex(6)NeuAc(1)	0	169	7.19	257	115	115	6.40202e-08	1.77488e-08	0	0	0.000331712	9.35076e-05	0	0	High
High	[K].NGTR.[A]	1xHexNAc(7)Hex(8)Fuc(1)NeuAc(3) [N1]	1	Q9Y4L1	Q9Y4L1 [922-925]	0	4184.55	HexNAc(7)Hex(8)Fuc(1)NeuAc(3)	1	922	1.8	109.5	0	0	0.0158563	0.00485437	0.00478469	0.00576369	0.987057	0.987717	0.44946	0.479538	High
High	[K].NGVNGTGENGR.[K]	1xHexNAc(5)Hex(6)Fuc(1)NeuAc(1) [N4]	1	P05556	P05556 [403-413]	0	3499.36	HexNAc(5)Hex(6)Fuc(1)NeuAc(1)	0	403	7.5	426.5	129.8	129.8	3.18934e-08	8.01314e-09	0	0	6.93619e-05	1.77923e-05	0	0	High
High	[K].NGVNGTGENGR.[K]	1xDeamidated [N1]; 1xHexNAc(5)Hex(6)Fuc(1) [N4]	1	P05556	P05556 [403-413]	0	3209.25	HexNAc(5)Hex(6)Fuc(1)	0	403	6.97	284.6	81.4	61	1.06496e-07	1.75932e-08	0	0	0.000231572	3.90961e-05	0	0	High
High	[K].NGVNGTGENGR.[K]	1xHexNAc(5)Hex(6)Fuc(1)NeuAc(2) [N4]	1	P05556	P05556 [403-413]	0	3790.45	HexNAc(5)Hex(6)Fuc(1)NeuAc(2)	0	403	6.56	285.1	43.7	43.7	2.75584e-07	4.371e-08	0	0	0.00059903	9.69664e-05	0	0	High
High	[K].NGVNGTGENGR.[K]	1xDeamidated [N9]; 1xHexNAc(4)Hex(5)Fuc(1)NeuAc(1) [N4]	2	P05556	P05556 [403-413]	0	3135.21	HexNAc(4)Hex(5)Fuc(1)NeuAc(1)	0	403	5.79	275.7	31.1	0.6	1.63164e-06	1.20327e-07	0	0	0.0035364	0.00378788	0.00377358	0.0041841	High
High	[K].NGVNGTGENGR.[K]	1xHexNAc(2)Hex(9) [N4]	1	P05556	P05556 [403-413]	0	2939.13	HexNAc(2)Hex(9)	0	403	4.94	169.7	39.4	39.4	1.15003e-05	1.00622e-06	0	0	0.0244116	0.0123077	0.0122324	0.0135593	High
High	[K].NGVNGTGENGR.[K]	1xDeamidated [N9]; 1xHexNAc(2)Hex(8) [N4]	1	P05556	P05556 [403-413]	0	2778.06	HexNAc(2)Hex(8)	0	403	3.31	108	9.9	9.1	0.000488216	4.62127e-05	0	0	0.51204	0.092803	0.0926276	0.101053	High
High	[K].NGVNGTGENGR.[K]	1xHexNAc(2)Hex(7) [N4]	1	P05556	P05556 [403-413]	0	2615.02	HexNAc(2)Hex(7)	0	403	2.07	25.6	8.5	8.5	0.00853851	0.00423729	0.00419287	0.00497512	0.947067	0.329545	0.329171	0.348466	High
High	[K].NITIVTGAPR.[H]	1xHexNAc(4)Hex(5)NeuAc(2) [N1]	1	P26006	P26006 [265-274]	0	3246.38	HexNAc(4)Hex(5)NeuAc(2)	0	265	7.78	439.2	179.5	179.5	1.67387e-08	4.07371e-09	0	0	3.64046e-05	8.96247e-06	0	0	High
High	[K].NITIVTGAPR.[H]	1xHexNAc(4)Hex(5)NeuAc(1) [N1]	1	P26006	P26006 [265-274]	0	2955.28	HexNAc(4)Hex(5)NeuAc(1)	0	265	7.5	397.2	177.2	177.2	3.15815e-08	7.55079e-09	0	0	6.86837e-05	1.67604e-05	0	0	High
High	[K].NITIVTGAPR.[H]	1xHexNAc(5)Hex(6)NeuAc(2) [N1]	1	P26006	P26006 [265-274]	0	3611.51	HexNAc(5)Hex(6)NeuAc(2)	0	265	7.45	318.5	110.1	110.1	3.5878e-08	8.66346e-09	0	0	7.80269e-05	1.92426e-05	0	0	High
High	[K].NITIVTGAPR.[H]	1xHexNAc(4)Hex(5)Fuc(1)NeuAc(2) [N1]	1	P26006	P26006 [265-274]	0	3392.44	HexNAc(4)Hex(5)Fuc(1)NeuAc(2)	0	265	7.38	370	154.1	88.8	4.20521e-08	1.0298e-08	0	0	9.14533e-05	2.28831e-05	0	0	High
High	[K].NITIVTGAPR.[H]	1xHexNAc(2)Hex(9) [N1]	1	P26006	P26006 [265-274]	0	2906.24	HexNAc(2)Hex(9)	0	265	4.94	169.8	38.9	38.9	1.15003e-05	1.03892e-06	0	0	0.0244116	0.0123077	0.0121581	0.013468	High
High	[K].NITR.[GL]	1xHexNAc(11)Hex(11)NeuAc(1) [N1]	2	O95171; Q9NR97	O95171 [383-386]; Q9NR97 [640-643]	0	4810.84	HexNAc(11)Hex(11)NeuAc(1)	0	383	1.29	73.2	73.2	73.2	0.0507315	0.00928074	0.00898876	0.0108992	0.126787	0.0150169	0.00704225	0.00784313	High
High	[K].NLNNSQSDVVSFR.[L]	1xHexNAc(5)Hex(6)Fuc(1)NeuAc(3) [N3]	1	P08648	P08648 [771-783]	0	4486.78	HexNAc(5)Hex(6)Fuc(1)NeuAc(3)	1	771	3.63	133.8	25.6	15.9	0.000236365	1.44443e-05	0	0	0.336056	0.0493827	0.0483092	0.0513513	High
High	[K].NLTLR.[C]	1xHexNAc(6)Hex(7)Fuc(1)NeuAc(2) [N1]	1	P05362	P05362 [130-134]	0	3697.47	HexNAc(6)Hex(7)Fuc(1)NeuAc(2)	0	130	6.24	290.3	45.2	45.2	5.74766e-07	7.54133e-08	0	0	0.00124855	0.000164338	0	0	High
High	[K].NLTLR.[C]	1xHexNAc(5)Hex(6)Fuc(1)NeuAc(2) [N1]	1	P05362	P05362 [130-134]	0	3332.34	HexNAc(5)Hex(6)Fuc(1)NeuAc(2)	0	130	6.24	293.5	44.8	44.8	5.74766e-07	7.73413e-08	0	0	0.00124855	0.000168623	0	0	High
High	[K].NLTLR.[C]	1xHexNAc(6)Hex(7)Fuc(1)NeuAc(1) [N1]	1	P05362	P05362 [130-134]	0	3406.38	HexNAc(6)Hex(7)Fuc(1)NeuAc(1)	0	130	6.12	279.3	44.1	44.1	7.60414e-07	8.20315e-08	0	0	0.00165118	0.000179043	0	0	High
High	[K].NLTLR.[C]	1xHexNAc(5)Hex(6)Fuc(1)NeuAc(3) [N1]	2	P05362	P05362 [130-134]	0	3623.44	HexNAc(5)Hex(6)Fuc(1)NeuAc(3)	0	130	5.24	259.9	23.6	23.6	5.73555e-06	4.01608e-07	0	0	0.0123232	0.00682594	0.00680272	0.00751879	High
High	[K].NLTLR.[C]	1xHexNAc(5)Hex(6)Fuc(1)NeuAc(1) [N1]	1	P05362	P05362 [130-134]	0	3041.24	HexNAc(5)Hex(6)Fuc(1)NeuAc(1)	0	130	5.74	262	39.4	39.4	1.81896e-06	1.43092e-07	0	0	0.00934147	0.000748899	0	0	High
High	[K].NLTLR.[C]	1xHexNAc(7)Hex(8)Fuc(1)NeuAc(2) [N1]	1	P05362	P05362 [130-134]	0	4062.6	HexNAc(7)Hex(8)Fuc(1)NeuAc(2)	0	130	2.78	227.3	7.2	7.2	0.00165086	0.000137347	0	0	0.891941	0.476113	0.249557	0.274319	High
High	[K].NLTLR.[C]	1xHexNAc(4)Hex(5)Fuc(1)NeuAc(1) [N1]	1	P05362	P05362 [130-134]	0	2676.11	HexNAc(4)Hex(5)Fuc(1)NeuAc(1)	0	130	1.89	82.3	15.5	15.5	0.0130206	0.00250627	0.00249376	0.003003	0.984426	0.922295	0.425806	0.456647	High
High	[K].NLTLR.[C]	1xHexNAc(4)Hex(5)Fuc(1)NeuAc(2) [N1]	2	P05362	P05362 [130-134]	0	2967.21	HexNAc(4)Hex(5)Fuc(1)NeuAc(2)	0	130	1.89	123.5	18.7	18.7	0.0130206	0.00250627	0.00248756	0.00299401	0.984426	0.922362	0.425349	0.45612	High
High	[K].NLTLR.[C]	1xHexNAc(11)Hex(11)NeuAc(1) [N1]	1	P05362	P05362 [130-134]	0	4923.93	HexNAc(11)Hex(11)NeuAc(1)	-1	130	1.24	63.8	11.6	11.6	0.0570176	0.00928074	0.00888889	0.0107817	0.995913	1	0.492562	0.520596	High
High	[K].NNHTASILDR.[M]	1xHexNAc(4)Hex(5)Fuc(1)NeuAc(2) [N2]	2	P08962	P08962 [129-138]	0	3491.41	HexNAc(4)Hex(5)Fuc(1)NeuAc(2)	0	129	7.66	444.1	165.9	135.6	2.18271e-08	5.39569e-09	0	0	4.74708e-05	1.19364e-05	0	0	High
High	[K].NNHTASILDR.[M]	1xHexNAc(5)Hex(6)Fuc(1)NeuAc(2) [N2]	3	P08962	P08962 [129-138]	0	3856.54	HexNAc(5)Hex(6)Fuc(1)NeuAc(2)	0	129	7.66	449.2	137.6	137.6	2.18271e-08	5.27662e-09	0	0	4.74708e-05	1.16693e-05	0	0	High
High	[K].NNHTASILDR.[M]	1xHexNAc(4)Hex(5)Fuc(1)NeuAc(1) [N2]	1	P08962	P08962 [129-138]	0	3200.31	HexNAc(4)Hex(5)Fuc(1)NeuAc(1)	0	129	7.56	476.2	164.3	164.3	2.7562e-08	6.63713e-09	0	0	5.99425e-05	1.47181e-05	0	0	High
High	[K].NNHTASILDR.[M]	1xHexNAc(6)Hex(7)Fuc(1)NeuAc(2) [N2]	2	P08962	P08962 [129-138]	0	4221.67	HexNAc(6)Hex(7)Fuc(1)NeuAc(2)	0	129	7.29	362.8	122.5	122.5	5.08827e-08	1.22414e-08	0	0	0.000110655	2.72025e-05	0	0	High
High	[K].NNHTASILDR.[M]	1xHexNAc(5)Hex(6)Fuc(1)NeuAc(3) [N2]	3	P08962	P08962 [129-138]	0	4147.63	HexNAc(5)Hex(6)Fuc(1)NeuAc(3)	0	129	7.06	375.8	193.2	91.6	8.66102e-08	1.5841e-08	0	0	0.000188338	3.52022e-05	0	0	High
High	[K].NNHTASILDR.[M]	1xHexNAc(7)Hex(8)Fuc(1)NeuAc(1) [N2]	1	P08962	P08962 [129-138]	0	4295.71	HexNAc(7)Hex(8)Fuc(1)NeuAc(1)	0	129	6.58	252.1	36.7	36.7	2.62875e-07	4.0743e-08	0	0	0.000571419	9.04009e-05	0	0	High
High	[K].NNHTASILDR.[M]	1xHexNAc(6)Hex(7)Fuc(1)NeuAc(1) [N2]	1	P08962	P08962 [129-138]	0	3930.57	HexNAc(6)Hex(7)Fuc(1)NeuAc(1)	0	129	6.52	348.1	52.2	52.2	2.99788e-07	4.97961e-08	0	0	0.000651608	0.000110426	0	0	High
High	[K].NNHTASILDR.[M]	1xHexNAc(6)Hex(7)Fuc(1) [N2]	1	P08962	P08962 [129-138]	0	3639.48	HexNAc(6)Hex(7)Fuc(1)	0	129	6.29	316.1	74.4	74.4	5.08383e-07	6.58124e-08	0	0	0.00110451	0.000142985	0	0	High
High	[K].NNHTASILDR.[M]	1xHexNAc(6)Hex(7)Fuc(1)NeuAc(3) [N2]	2	P08962	P08962 [129-138]	0	4512.77	HexNAc(6)Hex(7)Fuc(1)NeuAc(3)	0	129	3.98	186.2	58.4	58.4	0.000105233	3.94167e-06	0	0	0.184486	0.0218579	0.0215633	0.0240964	High
High	[K].NNHTASILDR.[M]	1xHexNAc(7)Hex(8)Fuc(1)NeuAc(2) [N2]	2	P08962	P08962 [129-138]	0	4586.8	HexNAc(7)Hex(8)Fuc(1)NeuAc(2)	0	129	7.3	323.6	170.5	102.1	4.96821e-08	1.56011e-08	0	0	0.000257439	8.22339e-05	0	0	High
High	[K].NNHTASILDR.[M]	1xHexNAc(7)Hex(8)Fuc(1) [N2]	1	P08962	P08962 [129-138]	0	4004.61	HexNAc(7)Hex(8)Fuc(1)	0	129	7.12	335.4	183.9	87.5	7.5415e-08	1.96291e-08	0	0	0.00039073	0.000103375	0	0	High
High	[K].NNHTASILDR.[M]	1xHexNAc(7)Hex(8)Fuc(1)NeuAc(3) [N2]	1	P08962	P08962 [129-138]	0	4877.9	HexNAc(7)Hex(8)Fuc(1)NeuAc(3)	0	129	3.04	103.2	8.4	8.4	0.000917425	2.64143e-05	0	0	0.822107	0.179252	0.127315	0.141753	High
High	[K].NVSCLWCNTNK.[A]	2xCarbamidomethyl [C4; C7]; 1xHexNAc(2)Hex(9) [N1]	1	P53801	P53801 [54-64]	0	3260.25	HexNAc(2)Hex(9)	0	54	5.22	175.6	93.3	93.3	5.99055e-06	4.75095e-07	0	0	0.0128642	0.00682594	0.00671141	0.00743494	High
High	[K].NVSCLWCNTNK.[A]	2xCarbamidomethyl [C4; C7]; 1xHexNAc(2)Hex(8) [N1]	1	P53801	P53801 [54-64]	0	3098.2	HexNAc(2)Hex(8)	0	54	5.06	150.6	48.9	48.9	8.76835e-06	8.00296e-07	0	0	0.0187193	0.00949367	0.00946372	0.0104895	High
High	[K].NVSCLWCNTNK.[A]	2xCarbamidomethyl [C4; C7]; 1xDeamidated [N8]; 1xHexNAc(2)Hex(7) [N1]	1	P53801	P53801 [54-64]	0	2937.13	HexNAc(2)Hex(7)	0	54	2.8	81.3	19.1	19.1	0.00157355	0.00232558	0.00229358	0.00271739	0.770264	0.164251	0.163987	0.176991	High
High	[K].NVSR.[L]	1xHexNAc(5)Hex(6)Fuc(1)NeuAc(3) [N1]	1	P78536	P78536 [174-177]	0	3482.32	HexNAc(5)Hex(6)Fuc(1)NeuAc(3)	0	174	1.87	156.3	3.9	3.9	0.0134165	0.00250627	0.00244499	0.00294118	0.984862	0.944956	0.431088	0.461111	High
High	[K].NVTNR.[S]	1xHexNAc(5)Hex(6)Fuc(1)NeuAc(2) [N1]	1	P05556	P05556 [94-98]	0	3319.28	HexNAc(5)Hex(6)Fuc(1)NeuAc(2)	0	94	1.87	125	2.7	2.7	0.0134165	0.00250627	0.00245098	0.00294985	0.984862	0.94176	0.429314	0.459309	High
High	[K].NVTNR.[S]	1xHexNAc(4)Hex(4)NeuAc(1) [N1]; 1xHexNAc(8)Hex(4) [N4]	1	P05556	P05556 [94-98]	0	4627.79	HexNAc(4)Hex(4)NeuAc(1); HexNAc(8)Hex(4)	0	94	1.31	88.9	15.6	15.6	0.0488482	0.00928074	0.00904977	0.010989	0.995285	1	0.480769	0.509749	High
High	[K].NVTNR.[S]	1xHexNAc(3)Hex(5)NeuAc(1) [N4]; 1xHexNAc(7)Hex(6) [N1]	1	P05556	P05556 [94-98]	0	4707.79	HexNAc(7)Hex(6); HexNAc(3)Hex(5)NeuAc(1)	-1	94	1.24	70	3.3	3.3	0.0570176	0.00928074	0.00890868	0.0108108	0.995913	1	0.492142	0.520175	High
High	[K].NVTVK.[S]	1xHexNAc(4)Hex(5)Fuc(1)NeuAc(2) [N1]	1	O75976	O75976 [855-859]	0	2911.17	HexNAc(4)Hex(5)Fuc(1)NeuAc(2)	0	855	2.82	176.8	4.3	4.3	0.00152529	7.45561e-05	0	0	0.884112	0.332912	0.195519	0.216216	High
High	[K].NVTVK.[S]	1xHexNAc(4)Hex(5)Fuc(1)NeuAc(1) [N1]	1	O75976	O75976 [855-859]	0	2620.08	HexNAc(4)Hex(5)Fuc(1)NeuAc(1)	0	855	1.57	122.5	4.3	4.3	0.0266643	0.00699301	0.00697674	0.00842696	0.991985	1	0.458527	0.487587	High
High	[K].QDNETGIYYETWNVK.[A]	1xHexNAc(2)Hex(9) [N3]	1	O75503	O75503 [201-215]	0	3724.48	HexNAc(2)Hex(9)	0	201	2.34	179	75.4	75.4	0.0045948	0.00232558	0.00215517	0.00255754	0.00918534	0.00378788	0.0034965	0.003861	High
High	[K].QLVHSFAEGQDQGSAYANR.[T]	1xHexNAc(4)Hex(5)Fuc(1)NeuAc(2) [N18]	1	Q5ZPR3	Q5ZPR3 [74-92]	0	4428.8	HexNAc(4)Hex(5)Fuc(1)NeuAc(2)	0	74	7.1	272.8	201.8	55.5	7.97199e-08	1.54705e-08	0	0	0.000173358	3.43789e-05	0	0	High
High	[K].SDYEGDLNK.[S]	1xHexNAc(4)Hex(5)Fuc(1)NeuAc(2) [N8]	1	Q86UQ4	Q86UQ4 [2787-2795]	0	3391.28	HexNAc(4)Hex(5)Fuc(1)NeuAc(2)	0	2787	2.82	138.1	17.6	17.6	0.00152529	8.29418e-05	0	0	0.884112	0.338049	0.196356	0.217002	High
High	[K].SDYEGDLNK.[S]	1xHexNAc(8)Hex(9)Fuc(1)NeuAc(4) [N8]	1	Q86UQ4	Q86UQ4 [2787-2795]	0	5434	HexNAc(8)Hex(9)Fuc(1)NeuAc(4)	1	2787	1.8	21.1	3.4	3.4	0.0158563	0.00485437	0.00477327	0.00574712	0.987057	0.988665	0.444767	0.47412	High
High	[K].SDYEGDLNK.[S]	1xHexNAc(6)Hex(9)Fuc(1)NeuAc(2) [N8]	1	Q86UQ4	Q86UQ4 [2787-2795]	0	4445.65	HexNAc(6)Hex(9)Fuc(1)NeuAc(2)	0	2787	1.19	99.9	12.5	12.5	0.0644693	0.00928074	0.00875273	0.0106383	0.996379	1	0.498799	0.526718	High
High	[K].SNLTVLR.[E]	1xHexNAc(5)Hex(6)Fuc(1)NeuAc(2) [N2]	1	P18084	P18084 [704-710]	0	3518.44	HexNAc(5)Hex(6)Fuc(1)NeuAc(2)	0	704	3.42	192.5	0.5	0.5	0.000383689	3.6864e-05	0	0	0.451867	0.0778688	0.0773931	0.0839002	High
High	[K].TAVNCSSDFDACLITK.[A]	2xCarbamidomethyl [C5; C12]; 1xHexNAc(4)Hex(5)Fuc(1)NeuAc(1) [N4]	1	P13987	P13987 [40-55]	0	3861.54	HexNAc(4)Hex(5)Fuc(1)NeuAc(1)	0	40	8.21	507.9	280.7	280.7	6.10409e-09	1.00222e-09	0	0	1.3276e-05	2.17998e-06	0	0	High
High	[K].TAVNCSSDFDACLITK.[A]	1xHexNAc(4)Hex(5)Fuc(1)NeuAc(2) [N4]; 2xCarbamidomethyl [C5; C12]	1	P13987	P13987 [40-55]	0	4152.64	HexNAc(4)Hex(5)Fuc(1)NeuAc(2)	0	40	7.52	431.7	270.4	77.6	3.04193e-08	7.07745e-09	0	0	6.61562e-05	1.57027e-05	0	0	High
High	[K].TAVNCSSDFDACLITK.[A]	2xCarbamidomethyl [C5; C12]; 1xHexNAc(6)Hex(7)Fuc(1) [N4]	1	P13987	P13987 [40-55]	0	4300.71	HexNAc(6)Hex(7)Fuc(1)	0	40	4.01	142.2	82.9	82.9	9.86115e-05	3.6539e-06	0	0	0.174959	0.0218579	0.0216802	0.0242424	High
High	[K].TAVNCSSDFDACLITK.[A]	2xCarbamidomethyl [C5; C12]; 1xHexNAc(5)Hex(6)Fuc(1)NeuAc(1) [N4]	1	P13987	P13987 [40-55]	0	4226.68	HexNAc(5)Hex(6)Fuc(1)NeuAc(1)	0	40	3.86	145.9	13.4	13.4	0.000138551	9.04146e-06	0	0	0.229255	0.026178	0.0257069	0.0288184	High
High	[K].TAVNCSSDFDACLITK.[A]	2xCarbamidomethyl [C5; C12]; 1xHexNAc(6)Hex(7)Fuc(1)NeuAc(1) [N4]	1	P13987	P13987 [40-55]	0	4591.81	HexNAc(6)Hex(7)Fuc(1)NeuAc(1)	0	40	2.38	69.5	2	2	0.00414326	0.00232558	0.00217865	0.00258398	0.897634	0.271447	0.270408	0.287101	High
High	[K].TCDWLPKPNMSASCK.[E]	1xHexNAc(4)Hex(5)Fuc(1)NeuAc(2) [N9]; 2xCarbamidomethyl [C2; C14]	1	P07602	P07602 [93-107]	0	4145.63	HexNAc(4)Hex(5)Fuc(1)NeuAc(2)	0	93	7.79	376.9	282.9	81.6	1.6097e-08	3.77297e-09	0	0	3.5009e-05	8.28372e-06	0	0	High
High	[K].TCDWLPKPNMSASCK.[E]	2xCarbamidomethyl [C2; C14]; 1xHexNAc(5)Hex(6)Fuc(1)NeuAc(3) [N9]	1	P07602	P07602 [93-107]	0	4801.86	HexNAc(5)Hex(6)Fuc(1)NeuAc(3)	0	93	7.23	360.7	267.7	267.7	5.9083e-08	1.25002e-08	0	0	0.000128487	2.7778e-05	0	0	High
High	[K].TCDWLPKPNMSASCK.[E]	2xCarbamidomethyl [C2; C14]; 1xOxidation [M10]; 1xHexNAc(5)Hex(6)Fuc(1)NeuAc(2) [N9]	1	P07602	P07602 [93-107]	0	4526.75	HexNAc(5)Hex(6)Fuc(1)NeuAc(2)	0	93	6.95	311	212.3	212.3	1.11288e-07	1.94148e-08	0	0	0.000241989	4.31414e-05	0	0	High
High	[K].TCDWLPKPNMSASCK.[E]	2xCarbamidomethyl [C2; C14]; 1xHexNAc(6)Hex(7)Fuc(1)NeuAc(3) [N9]	1	P07602	P07602 [93-107]	0	5166.99	HexNAc(6)Hex(7)Fuc(1)NeuAc(3)	1	93	5.17	163.6	111	111	6.73894e-06	5.14854e-07	0	0	0.0144484	0.00682594	0.00664452	0.00735294	High
High	[K].TCDWLPKPNMSASCK.[E]	2xCarbamidomethyl [C2; C14]; 1xHexNAc(6)Hex(7)Fuc(1)NeuAc(4) [N9]	1	P07602	P07602 [93-107]	0	5458.08	HexNAc(6)Hex(7)Fuc(1)NeuAc(4)	1	93	4.55	85.6	38	38	2.78846e-05	1.86146e-06	0	0	0.0572308	0.0151515	0.0142857	0.0160256	High
High	[K].TCDWLPKPNMSASCK.[E]	2xCarbamidomethyl [C2; C14]; 1xHexNAc(6)Hex(7)Fuc(1)NeuAc(1) [N9]	1	P07602	P07602 [93-107]	0	4584.8	HexNAc(6)Hex(7)Fuc(1)NeuAc(1)	1	93	5.5	161.9	89.5	89.5	3.18097e-06	2.33568e-07	0	0	0.016225	0.0012177	0	0	High
High	[K].TCDWLPKPNMSASCK.[E]	2xCarbamidomethyl [C2; C14]; 1xHexNAc(6)Hex(7)Fuc(1)NeuAc(2) [N9]	1	P07602	P07602 [93-107]	0	4875.89	HexNAc(6)Hex(7)Fuc(1)NeuAc(2)	1	93	4.1	102.9	31.7	31.7	7.99791e-05	9.16125e-06	0	0	0.291701	0.0739071	0.0530504	0.0591716	High
High	[K].TGIYQVLNGSR.[L]	1xHexNAc(5)Hex(6)NeuAc(2) [N8]	1	Q9UQV4	Q9UQV4 [225-235]	0	3777.55	HexNAc(5)Hex(6)NeuAc(2)	0	225	2.8	177	33.8	33.8	0.00159717	0.00232558	0.00227273	0.00269542	0.772879	0.174803	0.174528	0.185121	High
High	[K].TLENQSHETLER.[E]	1xDeamidated [Q5]; 1xHexNAc(4)Hex(5)Fuc(1)NeuAc(1) [N4]	1	P48681	P48681 [559-570]	0	3517.42	HexNAc(4)Hex(5)Fuc(1)NeuAc(1)	0	559	6.59	263.5	69.7	69.7	2.5888e-07	3.55927e-08	0	0	0.00134002	0.000187203	0	0	High
High	[K].TVTTSGTTNNTVTPTSQPVR.[K]	1xHexNAc(2)Hex(9) [N9]	1	Q04900	Q04900 [138-157]	0	3926.68	HexNAc(2)Hex(9)	0	138	9.33	513.7	375.6	375.6	4.6903e-10	7.17377e-11	0	0	1.02012e-06	1.63078e-07	0	0	High
High	[K].VASVININPNTTHSTGSCR.[S]	1xCarbamidomethyl [C18]; 1xHexNAc(5)Hex(6)Fuc(1) [N10]	1	P13473	P13473 [248-266]	0	4161.76	HexNAc(5)Hex(6)Fuc(1)	0	248	11.08	601.8	468.1	80.4	8.30146e-12	1.21235e-12	0	0	1.80553e-08	2.74083e-09	0	0	High
High	[K].VASVININPNTTHSTGSCR.[S]	1xCarbamidomethyl [C18]; 1xHexNAc(4)Hex(5)Fuc(1)NeuAc(1) [N10]	2	P13473	P13473 [248-266]	0	4087.73	HexNAc(4)Hex(5)Fuc(1)NeuAc(1)	0	248	10.08	573.7	411.7	121.2	8.30146e-11	7.24567e-12	0	0	1.80553e-07	1.47589e-08	0	0	High
High	[K].VASVININPNTTHSTGSCR.[S]	1xCarbamidomethyl [C18]; 1xHexNAc(5)Hex(6)Fuc(1)NeuAc(1) [N10]	1	P13473	P13473 [248-266]	0	4452.86	HexNAc(5)Hex(6)Fuc(1)NeuAc(1)	0	248	10.08	579.3	426.4	133.7	8.30146e-11	5.44165e-12	0	0	1.80553e-07	1.05078e-08	0	0	High
High	[K].VASVININPNTTHSTGSCR.[S]	1xCarbamidomethyl [C18]; 1xHexNAc(5)Hex(6)Fuc(1)NeuAc(2) [N10]	2	P13473	P13473 [248-266]	0	4743.96	HexNAc(5)Hex(6)Fuc(1)NeuAc(2)	0	248	9.5	538.3	404.9	81.3	3.12739e-10	3.74145e-11	0	0	6.80193e-07	8.45757e-08	0	0	High
High	[K].VASVININPNTTHSTGSCR.[S]	1xCarbamidomethyl [C18]; 1xHexNAc(6)Hex(7)Fuc(1)NeuAc(2) [N10]	1	P13473	P13473 [248-266]	0	5109.09	HexNAc(6)Hex(7)Fuc(1)NeuAc(2)	0	248	9.2	479.9	367.6	139.3	6.25321e-10	1.06047e-10	0	0	1.36004e-06	2.41071e-07	0	0	High
High	[K].VASVININPNTTHSTGSCR.[S]	1xCarbamidomethyl [C18]; 1xHexNAc(6)Hex(7)Fuc(1) [N10]	1	P13473	P13473 [248-266]	0	4526.9	HexNAc(6)Hex(7)Fuc(1)	0	248	7.68	322.8	172.8	101.8	2.1083e-08	4.91598e-09	0	0	4.58524e-05	1.08592e-05	0	0	High
High	[K].VASVININPNTTHSTGSCR.[S]	1xCarbamidomethyl [C18]; 1xHexNAc(4)Hex(5)Fuc(1) [N10]	1	P13473	P13473 [248-266]	0	3796.63	HexNAc(4)Hex(5)Fuc(1)	0	248	7.18	397.9	295.1	295.1	6.60155e-08	1.35714e-08	0	0	0.00014356	3.0159e-05	0	0	High
High	[K].VASVININPNTTHSTGSCR.[S]	1xCarbamidomethyl [C18]; 1xHexNAc(6)Hex(6)NeuAc(2) [N10]	1	P13473	P13473 [248-266]	0	4800.98	HexNAc(6)Hex(6)NeuAc(2)	-1	248	6.3	240.9	159.9	159.9	5.03993e-07	6.40562e-08	0	0	0.00109498	0.000139077	0	0	High
High	[K].VASVININPNTTHSTGSCR.[S]	1xCarbamidomethyl [C18]; 1xHexNAc(5)Hex(5)NeuAc(2) [N10]	1	P13473	P13473 [248-266]	0	4435.84	HexNAc(5)Hex(5)NeuAc(2)	-1	248	9.56	598.1	383.6	383.6	2.75727e-10	4.06043e-11	0	0	1.4291e-06	1.96041e-07	0	0	High
High	[K].VASVININPNTTHSTGSCR.[S]	1xCarbamidomethyl [C18]; 1xHexNAc(4)Hex(5)Fuc(1)NeuAc(2) [N10]	1	P13473	P13473 [248-266]	0	4378.82	HexNAc(4)Hex(5)Fuc(1)NeuAc(2)	0	248	8.79	521.2	349.2	100.3	1.60553e-09	3.4585e-10	0	0	8.32144e-06	1.67938e-06	0	0	High
High	[K].VASVININPNTTHSTGSCR.[S]	1xCarbamidomethyl [C18]; 1xHexNAc(6)Hex(7)Fuc(1)NeuAc(3) [N10]	1	P13473	P13473 [248-266]	0	5400.18	HexNAc(6)Hex(7)Fuc(1)NeuAc(3)	0	248	7.85	343.5	264.6	104.2	1.42269e-08	5.30742e-09	0	0	7.37335e-05	2.7987e-05	0	0	High
High	[K].VASVININPNTTHSTGSCR.[S]	1xCarbamidomethyl [C18]; 1xHexNAc(5)Hex(6)NeuAc(2) [N10]	1	P13473	P13473 [248-266]	0	4597.9	HexNAc(5)Hex(6)NeuAc(2)	0	248	7.45	256.1	146.5	52.2	3.55205e-08	1.02554e-08	0	0	0.000184071	5.41297e-05	0	0	High
High	[K].VIENNK.[T]	1xHexNAc(2)Hex(8) [N5]	1	Q86UQ4	Q86UQ4 [5005-5010]	0	2418.98	HexNAc(2)Hex(8)	0	5005	1.83	117.2	1.1	1.1	0.014708	0.00485437	0.00481928	0.00581395	0.986114	0.974977	0.442346	0.47234	High
High	[K].VLGQSQEPNVNPASAGNQTQK.[T]	1xHexNAc(4)Hex(5)Fuc(1)NeuAc(2) [N17]	1	Q5VW38	Q5VW38 [153-173]	0	4517.9	HexNAc(4)Hex(5)Fuc(1)NeuAc(2)	0	153	7.79	266	160.7	59.8	1.60963e-08	3.67358e-09	0	0	3.50075e-05	8.05914e-06	0	0	High
High	[K].VPGNQTSTTLK.[L]	1xHexNAc(4)Hex(5)Fuc(1)NeuAc(1) [N4]	1	P32004	P32004 [668-678]	0	3205.35	HexNAc(4)Hex(5)Fuc(1)NeuAc(1)	0	668	7.56	434	113.3	113.3	2.72407e-08	6.49479e-09	0	0	5.92439e-05	1.43996e-05	0	0	High
High	[K].VPGNQTSTTLK.[L]	1xHexNAc(4)Hex(5)Fuc(1)NeuAc(2) [N4]	1	P32004	P32004 [668-678]	0	3496.45	HexNAc(4)Hex(5)Fuc(1)NeuAc(2)	0	668	6.31	321.2	60	60	4.84638e-07	5.43511e-08	0	0	0.00250573	0.000285587	0	0	High
High	[K].WGHNITEFQQR.[F]	1xHexNAc(2)Hex(9) [N4]	1	Q96HE7	Q96HE7 [277-287]	0	3280.32	HexNAc(2)Hex(9)	0	277	7.78	291.1	133.9	133.9	1.6436e-08	5.86417e-09	0	0	8.51816e-05	3.09419e-05	0	0	High
High	[K].WQMNFTVR.[Y]	1xOxidation [M3]; 1xHexNAc(5)Hex(6)NeuAc(2) [N4]	1	P13473	P13473 [46-53]	0	3667.42	HexNAc(5)Hex(6)NeuAc(2)	0	46	6.61	360.3	89.8	89.8	2.46876e-07	3.88324e-08	0	0	0.000536662	8.61717e-05	0	0	High
High	[K].WQMNFTVR.[Y]	1xHexNAc(6)Hex(7)NeuAc(1) [N4]	1	P13473	P13473 [46-53]	0	3725.47	HexNAc(6)Hex(7)NeuAc(1)	0	46	3.42	129.4	2.8	2.8	0.000383689	3.93894e-05	0	0	0.451867	0.0816733	0.0807086	0.0877193	High
High	[K].YIHQNYTK.[A]	1xHexNAc(2)Hex(8) [N5]	1	Q02809	Q02809 [534-541]	0	2769.11	HexNAc(2)Hex(8)	0	534	6.05	247.6	69.5	69.5	9.0114e-07	9.23679e-08	0	0	0.00464937	0.000484499	0	0	High
High	[K].YIHQNYTK.[A]	1xHexNAc(2)Hex(9) [N5]	1	Q02809	Q02809 [534-541]	0	2931.17	HexNAc(2)Hex(9)	0	534	5.47	237.6	59.2	59.2	3.36837e-06	2.47563e-07	0	0	0.0171648	0.00128986	0	0	High
High	[K].YPHNHHVVNNTLEGNCSSK.[S]	1xCarbamidomethyl [C16]; 1xHexNAc(2)Hex(8) [N15]; 1xHexNAc(2)Hex(9) [N9]	1	P15586	P15586 [103-121]	0	5774.22	HexNAc(2)Hex(9); HexNAc(2)Hex(8)	0	103	8	358.9	341.4	137.6	1.00623e-08	1.65863e-09	0	0	2.18846e-05	3.66586e-06	0	0	High
High	[K].YPHNHHVVNNTLEGNCSSK.[S]	1xCarbamidomethyl [C16]; 1xHexNAc(2)Hex(3) [N9]; 1xHexNAc(7)Hex(7)Fuc(1) [N15]	1	P15586	P15586 [103-121]	0	5801.31	HexNAc(2)Hex(3); HexNAc(7)Hex(7)Fuc(1)	1	103	4.45	227	212.8	11.4	3.55436e-05	2.5297e-06	0	0	0.071649	0.0151515	0.0138889	0.0155279	High
High	[K].YPHNHHVVNNTLEGNCSSK.[S]	1xCarbamidomethyl [C16]; 1xDeamidated [N4]; 1xHexNAc(9)Hex(10)Fuc(1) [N15]	1	P15586	P15586 [103-121]	0	5802.29	HexNAc(9)Hex(10)Fuc(1)	1	103	3.42	53.6	36.3	36.3	0.000380817	2.90668e-05	0	0	0.449937	0.0709534	0.0682303	0.0736342	High
High	[K].YPHNHHVVNNTLEGNCSSK.[S]	1xCarbamidomethyl [C16]; 1xHexNAc(6)Hex(9)Fuc(1)NeuAc(2) [N15]	1	P15586	P15586 [103-121]	0	5612.21	HexNAc(6)Hex(9)Fuc(1)NeuAc(2)	0	103	2.54	135.2	119.3	28.6	0.00289761	0.00232558	0.0021978	0.00261097	0.860168	0.224828	0.223594	0.236173	High
High	[K].YPHNHHVVNNTLEGNCSSK.[S]	1xCarbamidomethyl [C16]; 1xHexNAc(5)Hex(6)Fuc(1)NeuAc(1) [N9]; 1xHexNAc(2)Hex(4)Fuc(1) [N15]	1	P15586	P15586 [103-121]	0	5832.3	HexNAc(5)Hex(6)Fuc(1)NeuAc(1); HexNAc(2)Hex(4)Fuc(1)	-1	103	2.5	154.4	135.8	19.7	0.00317108	0.00232558	0.00219298	0.00260417	0.870583	0.246667	0.246011	0.260492	High
High	[K].YPHNHHVVNNTLEGNCSSK.[S]	1xCarbamidomethyl [C16]; 1xHexNAc(2)Hex(9) [N9]; 1xHexNAc(2)Hex(7) [N15]	1	P15586	P15586 [103-121]	0	5612.17	HexNAc(2)Hex(9); HexNAc(2)Hex(7)	0	103	7.27	370.8	362.5	142.7	5.31321e-08	1.60948e-08	0	0	0.000275312	8.48251e-05	0	0	High
High	[K].YPHNHHVVNNTLEGNCSSK.[S]	1xCarbamidomethyl [C16]; 1xHexNAc(3)Hex(4) [N15]; 1xHexNAc(6)Hex(5)Fuc(1) [N9]	1	P15586	P15586 [103-121]	0	5639.25	HexNAc(6)Hex(5)Fuc(1); HexNAc(3)Hex(4)	1	103	4.73	175.1	175.1	2.8	1.87618e-05	1.42043e-06	0	0	0.0886992	0.00970231	0.0074074	0.00823045	High
High	[K].YPHNHHVVNNTLEGNCSSK.[S]	1xCarbamidomethyl [C16]; 1xHexNAc(2)Hex(9) [N9]; 1xHexNAc(1) [N15]	1	P15586	P15586 [103-121]	0	4274.72	HexNAc(2)Hex(9); HexNAc(1)	-1	103	4.6	287.7	231.8	231.8	2.53678e-05	1.73168e-06	0	0	0.115955	0.0110441	0.00729927	0.00813008	High
High	[K].YPHNHHVVNNTLEGNCSSK.[S]	1xCarbamidomethyl [C16]; 1xHexNAc(2)Hex(6) [N9]; 1xHexNAc(5)Hex(4)NeuAc(2) [N15]; 1xHexNAc(5)Hex(6)NeuAc(2) [N9]; 1xHexNAc(2)Hex(4) [N15]	2	P15586	P15586 [103-121]	0	5831.28	HexNAc(2)Hex(6); HexNAc(5)Hex(4)NeuAc(2)	0	103	4.59	174.9	157	12.4	2.55925e-05	1.82206e-06	0	0	0.116853	0.0114289	0.00727272	0.00809716	High
High	[K].YPHNHHVVNNTLEGNCSSK.[S]	1xCarbamidomethyl [C16]; 1xHexNAc(6)Hex(7)NeuAc(2) [N9]; 1xHexNAc(2)Hex(1) [N15]	1	P15586	P15586 [103-121]	0	5710.25	HexNAc(6)Hex(7)NeuAc(2); HexNAc(2)Hex(1)	1	103	2.78	38.1	38.1	1.5	0.00165526	0.000158149	0	0	0.892196	0.522199	0.268581	0.294444	High
High	[KR].NISR.[AL]	1xHexNAc(2)Hex(9) [N1]	2	Q86UQ4; Q96DT5	Q86UQ4 [2174-2177]; Q96DT5 [3347-3350]	0	2353.91	HexNAc(2)Hex(9)	0	2174	4.9	154.3	154.3	154.3	1.25459e-05	1.01657e-06	0	0	0.0611308	0.00629674	0.00387597	0.00431034	High
High	[KS].NITK.[LE]	1xHexNAc(6)Hex(10)Fuc(1)NeuAc(1) [N1]	2	P35749; Q86UQ4	P35749 [1024-1027]; Q86UQ4 [1785-1788]; [3076-3079]	0	3751.45	HexNAc(6)Hex(10)Fuc(1)NeuAc(1)	0	3076	5.54	120.6	120.6	120.6	2.87697e-06	2.20292e-07	0	0	0.0146967	0.00114917	0	0	High
High	[KS].NITK.[LE]	1xHexNAc(6)Hex(7)NeuAc(1) [N1]	2	P35749; Q86UQ4	P35749 [1024-1027]; Q86UQ4 [1785-1788]; [3076-3079]	0	3119.23	HexNAc(6)Hex(7)NeuAc(1)	0	3076	4.8	147.8	147.8	147.8	1.58964e-05	1.23417e-06	0	0	0.0762368	0.007741	0.00378788	0.00421941	High
High	[KS].NITK.[LE]	1xHexNAc(7)Hex(8)Fuc(1)NeuAc(4) [N1]	2	P35749; Q86UQ4	P35749 [1024-1027]; Q86UQ4 [1785-1788]; [3076-3079]	0	4503.71	HexNAc(7)Hex(8)Fuc(1)NeuAc(4)	-1	3076	2.42	54.3	54.3	54.3	0.00380129	0.000268998	0	0	0.949727	0.690791	0.339007	0.370543	High
High	[R].AACAVKPQEVQMVNGTITNPINGK.[S]	1xHexNAc(4)Hex(5)Fuc(1)NeuAc(2) [N14]; 1xCarbamidomethyl [C3]; 1xDeamidated [N22]; 1xOxidation [M12]	1	P11717	P11717 [2123-2146]	0	4908.11	HexNAc(4)Hex(5)Fuc(1)NeuAc(2)	1	2123	4.99	96.2	67.6	20.2	1.03302e-05	9.09862e-07	0	0	0.0219816	0.00949367	0.00928792	0.010274	High
High	[R].AEPPLNASASDQGEK.[V]	1xHexNAc(2)Hex(8) [N6]	1	Q9Y4L1	Q9Y4L1 [926-940]	0	3216.29	HexNAc(2)Hex(8)	0	926	8.19	485.8	341.8	341.8	6.52223e-09	1.06094e-09	0	0	1.41854e-05	2.31338e-06	0	0	High
High	[R].AEPPLNASASDQGEK.[V]	1xHexNAc(2)Hex(6) [N6]	1	Q9Y4L1	Q9Y4L1 [926-940]	0	2892.19	HexNAc(2)Hex(6)	0	926	8.03	480.8	304.3	304.3	9.29257e-09	1.41204e-09	0	0	2.02105e-05	3.10882e-06	0	0	High
High	[R].AEPPLNASASDQGEK.[V]	1xHexNAc(2)Hex(7) [N6]	1	Q9Y4L1	Q9Y4L1 [926-940]	0	3054.24	HexNAc(2)Hex(7)	0	926	7.67	369.7	269.6	269.6	2.13089e-08	5.03652e-09	0	0	4.63438e-05	1.11301e-05	0	0	High
High	[R].ALNFTK.[H]	1xHexNAc(7)Hex(8)Fuc(1)NeuAc(3) [N3]	1	Q86UQ4	Q86UQ4 [708-713]	0	4430.72	HexNAc(7)Hex(8)Fuc(1)NeuAc(3)	1	708	2.23	36.3	7	7	0.00592214	0.000385809	0	0	0.967003	0.76779	0.361647	0.393007	High
High	[R].ANLTVVLLR.[G]	1xHexNAc(6)Hex(7)Fuc(1)NeuAc(2) [N2]	1	P05362	P05362 [144-152]	0	4079.73	HexNAc(6)Hex(7)Fuc(1)NeuAc(2)	0	144	3.57	126.7	15.5	15.5	0.000267663	2.07107e-05	0	0	0.364217	0.0638298	0.062212	0.0670103	High
High	[R].ANLTVVLLR.[G]	1xHexNAc(5)Hex(6)NeuAc(2) [N2]	1	P05362	P05362 [144-152]	0	3568.54	HexNAc(5)Hex(6)NeuAc(2)	0	144	3.11	199.5	76.4	76.4	0.000779319	2.37143e-05	0	0	0.797255	0.170947	0.123543	0.137662	High
High	[R].ANLTVVLLR.[G]	1xHexNAc(6)Hex(7)NeuAc(3) [N2]	1	P05362	P05362 [144-152]	0	4224.77	HexNAc(6)Hex(7)NeuAc(3)	1	144	1.87	79.6	19.4	19.4	0.0134165	0.00250627	0.00243309	0.00293255	0.984862	0.974944	0.443669	0.473853	High
High	[R].DHHGANFSCR.[T]	1xCarbamidomethyl [C9]; 1xHexNAc(5)Hex(6)Fuc(1)NeuAc(2) [N6]	2	P05362	P05362 [178-187]	0	3916.46	HexNAc(5)Hex(6)Fuc(1)NeuAc(2)	0	178	10.71	649.8	429.5	429.5	1.93134e-11	2.65508e-12	0	0	4.20057e-08	6.0329e-09	0	0	High
High	[R].DHHGANFSCR.[T]	1xCarbamidomethyl [C9]; 1xHexNAc(7)Hex(8)Fuc(1)NeuAc(2) [N6]	1	P05362	P05362 [178-187]	0	4646.72	HexNAc(7)Hex(8)Fuc(1)NeuAc(2)	0	178	7.93	457.9	288.1	288.1	1.18118e-08	2.26223e-09	0	0	2.56895e-05	4.85205e-06	0	0	High
High	[R].DHHGANFSCR.[T]	1xCarbamidomethyl [C9]; 1xHexNAc(5)Hex(6)Fuc(1)NeuAc(3) [N6]	2	P05362	P05362 [178-187]	0	4207.55	HexNAc(5)Hex(6)Fuc(1)NeuAc(3)	0	178	7.89	475	325.1	325.1	1.28656e-08	2.70426e-09	0	0	2.79812e-05	5.86064e-06	0	0	High
High	[R].DHHGANFSCR.[T]	1xCarbamidomethyl [C9]; 1xHexNAc(6)Hex(7)Fuc(1)NeuAc(3) [N6]	1	P05362	P05362 [178-187]	0	4572.69	HexNAc(6)Hex(7)Fuc(1)NeuAc(3)	0	178	7.56	413.5	247.1	247.1	2.7699e-08	6.77849e-09	0	0	6.02406e-05	1.50342e-05	0	0	High
High	[R].DHHGANFSCR.[T]	1xCarbamidomethyl [C9]; 1xHexNAc(5)Hex(6)Fuc(1)NeuAc(1) [N6]	1	P05362	P05362 [178-187]	0	3625.36	HexNAc(5)Hex(6)Fuc(1)NeuAc(1)	0	178	3.87	178.6	55	55	0.000134421	6.8949e-06	0	0	0.223974	0.0242588	0.023622	0.0265487	High
High	[R].DHHGANFSCR.[T]	1xCarbamidomethyl [C9]; 1xHexNAc(6)Hex(6)NeuAc(2) [N6]	1	P05362	P05362 [178-187]	0	3973.48	HexNAc(6)Hex(6)NeuAc(2)	0	178	3.4	135.4	53.4	53.4	0.000400567	4.02639e-05	0	0	0.462564	0.0846457	0.0843137	0.091703	High
High	[R].DHHGANFSCR.[T]	1xCarbamidomethyl [C9]; 1xHexNAc(6)Hex(7)Fuc(1)NeuAc(1) [N6]	2	P05362	P05362 [178-187]	0	3990.5	HexNAc(6)Hex(7)Fuc(1)NeuAc(1)	0	178	8.56	520.8	351.4	351.4	2.75226e-09	4.6246e-10	0	0	1.42649e-05	2.32861e-06	0	0	High
High	[R].DHHGANFSCR.[T]	1xCarbamidomethyl [C9]; 1xHexNAc(6)Hex(7)Fuc(1)NeuAc(2) [N6]	1	P05362	P05362 [178-187]	0	4281.59	HexNAc(6)Hex(7)Fuc(1)NeuAc(2)	0	178	7.25	418	194.6	194.6	5.60555e-08	1.66146e-08	0	0	0.000290456	8.75538e-05	0	0	High
High	[R].DHHGANFSCR.[T]	1xCarbamidomethyl [C9]; 1xHexNAc(8)Hex(9)Fuc(1)NeuAc(3) [N6]	1	P05362	P05362 [178-187]	0	5302.95	HexNAc(8)Hex(9)Fuc(1)NeuAc(3)	0	178	5.68	100.4	74.2	74.2	2.09751e-06	1.68459e-07	0	0	0.0107569	0.000880686	0	0	High
High	[R].DHHGANFSCR.[T]	1xCarbamidomethyl [C9]; 1xHexNAc(7)Hex(8)Fuc(1)NeuAc(1) [N6]	1	P05362	P05362 [178-187]	0	4355.63	HexNAc(7)Hex(8)Fuc(1)NeuAc(1)	-1	178	4.86	207.6	81.5	81.5	1.37e-05	1.0667e-06	0	0	0.0663884	0.00674745	0.00384615	0.0042735	High
High	[R].DSEAFCHANCSGPAPAAKPDPDGGR.[A]	2xCarbamidomethyl [C6; C10]; 1xHexNAc(2)Hex(9) [N9]	1	Q92791	Q92791 [71-95]	0	4448.73	HexNAc(2)Hex(9)	0	71	7.97	451.5	374.1	374.1	1.06702e-08	1.90934e-09	0	0	2.32066e-05	4.04345e-06	0	0	High
High	[R].DYYLNK.[T]	1xHexNAc(5)Hex(6)Fuc(1)NeuAc(2) [N5]	1	P42892	P42892 [266-271]	0	3531.36	HexNAc(5)Hex(6)Fuc(1)NeuAc(2)	0	266	6.53	290.6	98.6	98.6	2.9414e-07	4.87545e-08	0	0	0.000639339	0.000108123	0	0	High
High	[R].DYYLNK.[T]	1xHexNAc(6)Hex(7)Fuc(1)NeuAc(2) [N5]	1	P42892	P42892 [266-271]	0	3896.49	HexNAc(6)Hex(7)Fuc(1)NeuAc(2)	0	266	3.42	192.9	3.3	3.3	0.000383689	3.43012e-05	0	0	0.451867	0.0748441	0.0743801	0.0806451	High
High	[R].DYYLNK.[T]	1xHexNAc(5)Hex(6)Fuc(1)NeuAc(1) [N5]	1	P42892	P42892 [266-271]	0	3240.26	HexNAc(5)Hex(6)Fuc(1)NeuAc(1)	0	266	3.12	160.3	19.3	19.3	0.000752605	5.21979e-05	0	0	0.617033	0.115732	0.115108	0.123506	High
High	[R].DYYLNK.[T]	1xHexNAc(6)Hex(7)Fuc(1)NeuAc(1) [N5]	1	P42892	P42892 [266-271]	0	3605.39	HexNAc(6)Hex(7)Fuc(1)NeuAc(1)	0	266	3.12	146.1	7.1	7.1	0.000752605	5.05382e-05	0	0	0.617033	0.115732	0.115315	0.123752	High
High	[R].EAGNHTSGAGLVQINK.[S]	1xHexNAc(5)Hex(6)Fuc(1)NeuAc(2) [N4]	3	P20645	P20645 [80-95]	0	4311.78	HexNAc(5)Hex(6)Fuc(1)NeuAc(2)	0	80	8.31	502.2	349.3	321.8	4.89211e-09	6.80238e-10	0	0	1.064e-05	1.44596e-06	0	0	High
High	[R].EAGNHTSGAGLVQINK.[S]	1xHexNAc(4)Hex(5)Fuc(1)NeuAc(2) [N4]	1	P20645	P20645 [80-95]	0	3946.64	HexNAc(4)Hex(5)Fuc(1)NeuAc(2)	0	80	8.1	552	246.9	165.3	7.98352e-09	1.25771e-09	0	0	1.73635e-05	2.75954e-06	0	0	High
High	[R].EAGNHTSGAGLVQINK.[S]	1xHexNAc(4)Hex(5)Fuc(1)NeuAc(1) [N4]	1	P20645	P20645 [80-95]	0	3655.55	HexNAc(4)Hex(5)Fuc(1)NeuAc(1)	0	80	7.71	492.2	201.2	201.2	1.93817e-08	4.19238e-09	0	0	4.21525e-05	9.23014e-06	0	0	High
High	[R].EAGNHTSGAGLVQINK.[S]	1xHexNAc(5)Hex(6)Fuc(1)NeuAc(3) [N4]	1	P20645	P20645 [80-95]	0	4602.87	HexNAc(5)Hex(6)Fuc(1)NeuAc(3)	0	80	8.46	537.6	417.8	330.5	3.45281e-09	9.17842e-10	0	0	1.78957e-05	4.82214e-06	0	0	High
High	[R].EAGNHTSGAGLVQINK.[S]	1xHexNAc(4)Hex(5)NeuAc(2) [N4]	1	P20645	P20645 [80-95]	0	3800.59	HexNAc(4)Hex(5)NeuAc(2)	0	80	7.61	285.5	77.6	77.6	2.42916e-08	8.14718e-09	0	0	0.000125889	4.30033e-05	0	0	High
High	[R].EAGNHTSGAGLVQINK.[S]	1xHexNAc(5)Hex(6)Fuc(1)NeuAc(1) [N4]	2	P20645	P20645 [80-95]	0	4020.68	HexNAc(5)Hex(6)Fuc(1)NeuAc(1)	0	80	6.75	337.7	71.8	71.8	1.79568e-07	2.82745e-08	0	0	0.000929862	0.00014878	0	0	High
High	[R].EAGNHTSGAGLVQINK.[S]	1xHexNAc(2)Hex(8) [N4]	1	P20645	P20645 [80-95]	0	3298.39	HexNAc(2)Hex(8)	0	80	6.71	245	49.7	49.7	1.94998e-07	3.01065e-08	0	0	0.00100968	0.000158401	0	0	High
High	[R].EAGNHTSGAGLVQINK.[S]	1xHexNAc(6)Hex(10)Fuc(1)NeuAc(1) [N4]	1	P20645	P20645 [80-95]	0	4871.97	HexNAc(6)Hex(10)Fuc(1)NeuAc(1)	1	80	3.82	51.3	4.4	4.4	0.000150129	1.12155e-05	0	0	0.43461	0.0866225	0.0613811	0.0687679	High
High	[R].EAGNHTSGAGLVQINK.[S]	1xHexNAc(3)Hex(6)Fuc(1)NeuAc(1) [N4]; 1xHexNAc(1)Fuc(1) [N15]	1	P20645	P20645 [80-95]	0	3963.66	HexNAc(3)Hex(6)Fuc(1)NeuAc(1); HexNAc(1)Fuc(1)	0	80	2.14	128	22.3	22.3	0.00731118	0.000450689	0	0	0.973016	0.857868	0.396532	0.427681	High
High	[R].EASIVGENETYPR.[A]	1xHexNAc(2)Hex(9) [N8]	1	Q9UBV2	Q9UBV2 [601-613]	0	3329.33	HexNAc(2)Hex(9)	0	601	12.98	720.4	447.9	447.9	1.05375e-13	2.04405e-14	0	0	2.29185e-10	4.66686e-11	0	0	High
High	[R].EASIVGENETYPR.[A]	1xHexNAc(2)Hex(8) [N8]	1	Q9UBV2	Q9UBV2 [601-613]	0	3167.28	HexNAc(2)Hex(8)	0	601	9.98	569.7	397.8	397.8	1.05375e-10	1.16069e-11	0	0	2.29185e-07	2.49696e-08	0	0	High
High	[R].ELAVPDGYTNR.[T]	1xHexNAc(5)Hex(6)Fuc(1)NeuAc(1) [N10]	1	P26006	P26006 [77-87]	0	3659.47	HexNAc(5)Hex(6)Fuc(1)NeuAc(1)	0	77	8.64	587	251.5	251.5	2.31113e-09	3.93354e-10	0	0	5.02657e-06	8.88146e-07	0	0	High
High	[R].ELAVPDGYTNR.[T]	1xHexNAc(4)Hex(5)Fuc(1)NeuAc(1) [N10]	1	P26006	P26006 [77-87]	0	3294.34	HexNAc(4)Hex(5)Fuc(1)NeuAc(1)	0	77	7.5	371.9	197.5	197.5	3.15815e-08	7.39373e-09	0	0	6.86837e-05	1.64095e-05	0	0	High
High	[R].ELAVPDGYTNR.[T]	1xHexNAc(2)Hex(9) [N10]	1	P26006	P26006 [77-87]	0	3099.24	HexNAc(2)Hex(9)	0	77	7.48	355.3	224.3	224.3	3.30688e-08	8.32114e-09	0	0	7.19181e-05	1.84791e-05	0	0	High
High	[R].ELAVPDGYTNR.[T]	1xHexNAc(5)Hex(6)Fuc(1)NeuAc(3) [N10]	1	P26006	P26006 [77-87]	0	4241.66	HexNAc(5)Hex(6)Fuc(1)NeuAc(3)	-1	77	5.62	296.5	84.2	84.2	2.39259e-06	1.61879e-07	0	0	0.00517727	0.00378788	0.00367647	0.00406504	High
High	[R].ELAVPDGYTNR.[T]	1xHexNAc(7)Hex(8)Fuc(1)NeuAc(1) [N10]	1	P26006	P26006 [77-87]	0	4389.74	HexNAc(7)Hex(8)Fuc(1)NeuAc(1)	0	77	5.11	186.5	99.6	99.6	7.81621e-06	6.03733e-07	0	0	0.0167201	0.00682594	0.00653595	0.00722021	High
High	[R].ELAVPDGYTNR.[T]	1xHexNAc(7)Hex(8)Fuc(1)NeuAc(3) [N10]	1	P26006	P26006 [77-87]	0	4971.93	HexNAc(7)Hex(8)Fuc(1)NeuAc(3)	1	77	4.83	154.9	48.2	48.2	1.49212e-05	1.375e-06	0	0	0.0314482	0.0151515	0.0147929	0.0164474	High
High	[R].ELAVPDGYTNR.[T]	1xHexNAc(7)Hex(8)Fuc(1)NeuAc(2) [N10]	1	P26006	P26006 [77-87]	0	4680.83	HexNAc(7)Hex(8)Fuc(1)NeuAc(2)	0	77	3.95	177.7	93.4	93.4	0.000111065	4.53837e-06	0	0	0.192694	0.0242588	0.0241287	0.027027	High
High	[R].ELAVPDGYTNR.[T]	1xHexNAc(6)Hex(7)Fuc(1)NeuAc(1) [N10]	2	P26006	P26006 [77-87]	0	4024.61	HexNAc(6)Hex(7)Fuc(1)NeuAc(1)	0	77	3.91	118.6	36.2	36.2	0.000121925	5.50832e-06	0	0	0.207548	0.0242588	0.0238727	0.0267062	High
High	[R].ELAVPDGYTNR.[T]	1xHexNAc(4)Hex(5)Fuc(1)NeuAc(2) [N10]	1	P26006	P26006 [77-87]	0	3585.44	HexNAc(4)Hex(5)Fuc(1)NeuAc(2)	0	77	3.81	151.9	4.9	4.9	0.000154327	1.12892e-05	0	0	0.248779	0.0326633	0.0325814	0.0366197	High
High	[R].ELAVPDGYTNR.[T]	1xHexNAc(7)Hex(8)Fuc(1) [N10]	1	P26006	P26006 [77-87]	0	4098.64	HexNAc(7)Hex(8)Fuc(1)	0	77	2.7	93.9	6.1	6.1	0.00199718	0.00232558	0.00223714	0.00265957	0.809539	0.194903	0.193165	0.203915	High
High	[R].ELAVPDGYTNR.[T]	1xHexNAc(5)Hex(6)Fuc(1)NeuAc(2) [N10]	1	P26006	P26006 [77-87]	0	3950.57	HexNAc(5)Hex(6)Fuc(1)NeuAc(2)	0	77	2.58	120.9	32.5	32.5	0.00260211	0.00232558	0.00221239	0.00263158	0.846827	0.212251	0.211648	0.223602	High
High	[R].ELAVPDGYTNR.[T]	1xHexNAc(6)Hex(7)Fuc(1)NeuAc(2) [N10]	2	P26006	P26006 [77-87]	0	4315.7	HexNAc(6)Hex(7)Fuc(1)NeuAc(2)	0	77	7.76	305.3	170	170	1.74102e-08	6.43297e-09	0	0	9.02297e-05	3.39539e-05	0	0	High
High	[R].ELAVPDGYTNR.[T]	1xHexNAc(5)Hex(6)Fuc(1) [N10]	1	P26006	P26006 [77-87]	0	3368.38	HexNAc(5)Hex(6)Fuc(1)	0	77	7.75	310.9	160.9	160.9	1.76712e-08	6.87113e-09	0	0	9.15825e-05	3.62687e-05	0	0	High
High	[R].ELAVPDGYTNR.[T]	1xHexNAc(6)Hex(7)Fuc(1) [N10]	1	P26006	P26006 [77-87]	0	3733.51	HexNAc(6)Hex(7)Fuc(1)	0	77	7.75	315.5	172.7	172.7	1.76712e-08	6.7642e-09	0	0	9.15825e-05	3.57042e-05	0	0	High
High	[R].ELAVPDGYTNR.[T]	1xHexNAc(6)Hex(7)Fuc(1)NeuAc(3) [N10]	1	P26006	P26006 [77-87]	0	4606.8	HexNAc(6)Hex(7)Fuc(1)NeuAc(3)	-1	77	6.48	337.8	194.6	194.6	3.34259e-07	3.84208e-08	0	0	0.00172954	0.000202046	0	0	High
High	[R].EQQLESCACNETDNSCK.[V]	3xCarbamidomethyl [C7; C9; C16]; 1xHexNAc(2)Hex(8) [N10]	1	P78536	P78536 [585-601]	0	3775.38	HexNAc(2)Hex(8)	0	585	2.08	182.9	52.6	52.6	0.0083905	0.00423729	0.00420168	0.00498753	0.0139798	0.00682594	0.00666666	0.00738007	High
High	[R].FANEYPNITR.[L]	1xHexNAc(4)Hex(5)Fuc(1)NeuAc(2) [N7]	1	O75976	O75976 [516-525]	0	3575.43	HexNAc(4)Hex(5)Fuc(1)NeuAc(2)	0	516	7.58	403.2	149	134.8	2.60956e-08	6.07494e-09	0	0	5.67536e-05	1.34596e-05	0	0	High
High	[R].FANEYPNITR.[L]	1xHexNAc(5)Hex(6)Fuc(1)NeuAc(3) [N7]	1	O75976	O75976 [516-525]	0	4231.66	HexNAc(5)Hex(6)Fuc(1)NeuAc(3)	1	516	3.57	127	4	4	0.000267663	1.94377e-05	0	0	0.364217	0.0638298	0.0627907	0.0677083	High
High	[R].FINYNQTVSR.[M]	1xHexNAc(2)Hex(9) [N5]	1	Q8N766	Q8N766 [909-918]	0	3106.26	HexNAc(2)Hex(9)	0	909	8.03	516.1	218.7	218.7	9.37022e-09	1.49162e-09	0	0	2.03794e-05	3.28872e-06	0	0	High
High	[R].FINYNQTVSR.[M]	1xHexNAc(2)Hex(8) [N5]	1	Q8N766	Q8N766 [909-918]	0	2944.21	HexNAc(2)Hex(8)	0	909	2.74	89.9	24.4	24.4	0.00180458	0.00232558	0.00225225	0.0026738	0.793499	0.182927	0.181818	0.193012	High
High	[R].FNQCNTTR.[G]	1xCarbamidomethyl [C4]; 1xHexNAc(4)Hex(5)Fuc(1)NeuAc(1) [N5]	1	P09923	P09923 [137-144]	0	3100.19	HexNAc(4)Hex(5)Fuc(1)NeuAc(1)	0	137	6.54	260.7	98.9	98.9	2.86503e-07	4.67245e-08	0	0	0.00062275	0.000103634	0	0	High
High	[R].GDKNVTMGQSSAR.[M]	1xHexNAc(4)Hex(5)Fuc(1)NeuAc(1) [N4]	1	P48960	P48960 [368-380]	1	3410.38	HexNAc(4)Hex(5)Fuc(1)NeuAc(1)	0	368	6.62	363.5	112	112	2.41515e-07	3.43726e-08	0	0	0.00125025	0.000180799	0	0	High
High	[R].GHTLTLNFTR.[N]	1xHexNAc(2)Hex(7) [N7]	1	P11279	P11279 [97-106]	0	2700.15	HexNAc(2)Hex(7)	0	97	4.83	167.5	67.2	67.2	1.47438e-05	1.33382e-06	0	0	0.0310859	0.0151515	0.0148368	0.0165016	High
High	[R].GPGIKPNQTSK.[M]	1xHexNAc(2)Hex(7) [N7]	1	P15586	P15586 [356-366]	0	2667.15	HexNAc(2)Hex(7)	0	356	6.56	290.7	142.6	142.6	2.73089e-07	4.27191e-08	0	0	0.000593609	9.4774e-05	0	0	High
High	[R].GSNFTVAPSVVNSDNR.[R]	1xHexNAc(4)Hex(6)NeuAc(1) [N3]	1	Q5T5U3	Q5T5U3 [554-569]	0	3739.53	HexNAc(4)Hex(6)NeuAc(1)	0	554	1.72	126.9	41.3	41.3	0.0190263	0.00485437	0.00470588	0.00564972	0.0633906	0.00651718	0.003861	0.00429184	High
High	[R].GYYNQSEAGSHTVQR.[M]	1xHexNAc(4)Hex(5)Fuc(1)NeuAc(1) [N4]	1	P01892	P01892 [107-121]	0	3756.5	HexNAc(4)Hex(5)Fuc(1)NeuAc(1)	0	107	11.98	651.5	412	412	1.05375e-12	1.13058e-13	0	0	2.29185e-09	1.91772e-10	0	0	High
High	[R].GYYNQSEAGSHTVQR.[M]	1xHexNAc(5)Hex(6)Fuc(1)NeuAc(2) [N4]	1	P01892	P01892 [107-121]	0	4412.73	HexNAc(5)Hex(6)Fuc(1)NeuAc(2)	0	107	8.28	510	321.9	158.9	5.2652e-09	7.81845e-10	0	0	1.14514e-05	1.67814e-06	0	0	High
High	[R].GYYNQSEAGSHTVQR.[M]	1xHexNAc(6)Hex(7)Fuc(1)NeuAc(2) [N4]	1	P01892	P01892 [107-121]	0	4777.86	HexNAc(6)Hex(7)Fuc(1)NeuAc(2)	1	107	7.51	361.1	224.8	67.2	3.09643e-08	7.2346e-09	0	0	6.73414e-05	1.60539e-05	0	0	High
High	[R].IGTFCSNGTVSR.[I]	1xCarbamidomethyl [C5]; 1xHexNAc(5)Hex(6)NeuAc(2) [N7]	1	Q9H5V8	Q9H5V8 [174-185]	0	3868.52	HexNAc(5)Hex(6)NeuAc(2)	0	174	3.57	188.7	8.9	8.9	0.000267663	1.75035e-05	0	0	0.364217	0.0638298	0.0636792	0.0687831	High
High	[R].IGTFCSNGTVSR.[I]	1xCarbamidomethyl [C5]; 1xHexNAc(5)Hex(6)Fuc(1)NeuAc(2) [N7]	1	Q9H5V8	Q9H5V8 [174-185]	0	4014.58	HexNAc(5)Hex(6)Fuc(1)NeuAc(2)	1	174	2.8	202.6	27.4	27.4	0.00159717	0.00232558	0.0022831	0.0027027	0.772879	0.173016	0.172742	0.182927	High
High	[R].IKEVNETNK.[R]	1xHexNAc(4)Hex(5)Fuc(1)NeuAc(2) [N5]	1	Q9UPN9	Q9UPN9 [348-356]	1	3425.41	HexNAc(4)Hex(5)Fuc(1)NeuAc(2)	0	348	2.79	283.6	80.6	80.6	0.00160388	0.00232558	0.00226757	0.00268817	0.00400694	0.00378788	0.0037594	0.00416666	High
High	[R].INTTADEKDPTNPFR.[F]	1xHexNAc(2)Hex(9) [N2]	1	O14672	O14672 [277-291]	1	3583.47	HexNAc(2)Hex(9)	0	277	6.85	474.9	287.4	287.4	1.42092e-07	2.56307e-08	0	0	0.000308949	5.69298e-05	0	0	High
High	[R].IVDVNLTSEGK.[V]	1xHexNAc(4)Hex(5)Fuc(1)NeuAc(2) [N5]	1	Q9HD45	Q9HD45 [170-180]	0	3525.46	HexNAc(4)Hex(5)Fuc(1)NeuAc(2)	0	170	7.88	451.5	227.7	104.4	1.30963e-08	2.79463e-09	0	0	2.84831e-05	6.0663e-06	0	0	High
High	[R].IVDVNLTSEGK.[V]	1xHexNAc(4)Hex(5)NeuAc(2) [N5]	1	Q9HD45	Q9HD45 [170-180]	0	3379.4	HexNAc(4)Hex(5)NeuAc(2)	0	170	7.78	499	230.6	230.6	1.65374e-08	3.97399e-09	0	0	3.59668e-05	8.73754e-06	0	0	High
High	[R].IVDVNLTSEGK.[V]	1xHexNAc(4)Hex(5)Fuc(1)NeuAc(1) [N5]	1	Q9HD45	Q9HD45 [170-180]	0	3234.37	HexNAc(4)Hex(5)Fuc(1)NeuAc(1)	0	170	6.86	251.6	91.3	91.3	1.37303e-07	2.39686e-08	0	0	0.000298539	5.32449e-05	0	0	High
High	[R].IVSPEPGGAVGPNLTCR.[W]	1xCarbamidomethyl [C16]; 1xHexNAc(5)Hex(6)Fuc(1)NeuAc(3) [N13]	1	Q6UXD5	Q6UXD5 [361-377]	0	4730.94	HexNAc(5)Hex(6)Fuc(1)NeuAc(3)	0	361	1.3	142.5	43.3	43.3	0.0497721	0.00928074	0.00900901	0.010929	0.124389	0.0142242	0.0070922	0.00790514	High
High	[R].KDNTTVTR.[L]	1xHexNAc(4)Hex(5)Fuc(1)NeuAc(1) [N3]	2	P11279	P11279 [247-254]	1	2994.23	HexNAc(4)Hex(5)Fuc(1)NeuAc(1)	0	247	6.5	367.4	77.7	77.7	3.16502e-07	5.08982e-08	0	0	0.000687911	0.000112862	0	0	High
High	[R].KDNTTVTR.[L]	1xHexNAc(5)Hex(6)Fuc(1)NeuAc(2) [N3]	4	P11279	P11279 [247-254]	1	3650.46	HexNAc(5)Hex(6)Fuc(1)NeuAc(2)	0	247	6.5	398.1	75.4	75.4	3.16502e-07	5.19912e-08	0	0	0.000687911	0.000115279	0	0	High
High	[R].KDNTTVTR.[L]	1xHexNAc(5)Hex(6)Fuc(1)NeuAc(1) [N3]	2	P11279	P11279 [247-254]	1	3359.36	HexNAc(5)Hex(6)Fuc(1)NeuAc(1)	0	247	6.49	362.3	90.7	90.7	3.19972e-07	5.41728e-08	0	0	0.000695448	0.0001201	0	0	High
High	[R].KDNTTVTR.[L]	1xHexNAc(4)Hex(5)Fuc(1)NeuAc(2) [N3]	1	P11279	P11279 [247-254]	1	3285.33	HexNAc(4)Hex(5)Fuc(1)NeuAc(2)	0	247	5.24	268.5	29.7	29.7	5.76605e-06	4.19731e-07	0	0	0.012388	0.00682594	0.00677966	0.00749063	High
High	[R].KDNTTVTR.[L]	1xHexNAc(5)Hex(6)Fuc(1) [N3]	1	P11279	P11279 [247-254]	1	3068.27	HexNAc(5)Hex(6)Fuc(1)	0	247	1.44	170.4	11.8	11.8	0.0359988	0.00928074	0.00921659	0.0111111	0.993867	1	0.47636	0.505213	High
High	[R].KENSSEICSNNGECVCGQCVCR.[K]	5xCarbamidomethyl [C8; C14; C16; C19; C21]; 1xHexNAc(2)Hex(8) [N3]	3	P05556	P05556 [518-539]	1	4349.62	HexNAc(2)Hex(8)	0	518	13.44	705.5	515.8	172	3.67072e-14	3.85429e-15	0	0	7.98364e-11	8.92645e-12	0	0	High
High	[R].KENSSEICSNNGECVCGQCVCR.[K]	5xCarbamidomethyl [C8; C14; C16; C19; C21]; 1xHexNAc(5)Hex(6)Fuc(1)NeuAc(2) [N3]	1	P05556	P05556 [518-539]	1	5363	HexNAc(5)Hex(6)Fuc(1)NeuAc(2)	1	518	4.7	101.1	44.6	7.4	2.00601e-05	1.65941e-06	0	0	0.0418331	0.0151515	0.0144927	0.0162338	High
High	[R].KENSSEICSNNGECVCGQCVCR.[K]	1xHexNAc(4)Hex(5)Fuc(1)NeuAc(2) [N3]; 5xCarbamidomethyl [C8; C14; C16; C19; C21]	1	P05556	P05556 [518-539]	1	4997.87	HexNAc(4)Hex(5)Fuc(1)NeuAc(2)	1	518	3.46	122.1	12.7	12.7	0.000350242	2.4773e-05	0	0	0.428547	0.0709534	0.0706402	0.0763547	High
High	[R].KENSSEICSNNGECVCGQCVCR.[K]	5xCarbamidomethyl [C8; C14; C16; C19; C21]; 1xHexNAc(6)Hex(7)Fuc(1)NeuAc(2) [N3]	1	P05556	P05556 [518-539]	1	5728.14	HexNAc(6)Hex(7)Fuc(1)NeuAc(2)	0	518	7.53	327.3	130.4	95.4	2.92665e-08	8.81216e-09	0	0	0.000151667	4.65133e-05	0	0	High
High	[R].KENSSEICSNNGECVCGQCVCR.[K]	5xCarbamidomethyl [C8; C14; C16; C19; C21]; 1xHexNAc(6)Hex(3) [N3]	1	P05556	P05556 [518-539]	1	4351.68	HexNAc(6)Hex(3)	0	518	7.22	281	148	25.1	6.0716e-08	1.71575e-08	0	0	0.000314597	9.04032e-05	0	0	High
High	[R].KENSSEICSNNGECVCGQCVCR.[K]	5xCarbamidomethyl [C8; C14; C16; C19; C21]; 1xHexNAc(6)Hex(7)Fuc(1)NeuAc(3) [N3]	2	P05556	P05556 [518-539]	1	6019.23	HexNAc(6)Hex(7)Fuc(1)NeuAc(3)	1	518	4.09	150.3	85.7	59.7	8.20411e-05	9.39409e-06	0	0	0.296995	0.0766219	0.0580475	0.0647059	High
High	[R].LKPLFNK.[S]	1xHexNAc(2)Hex(8) [N6]	1	P20645	P20645 [52-58]	0	2562.12	HexNAc(2)Hex(8)	0	52	6.87	257.2	142.1	142.1	1.33507e-07	2.28736e-08	0	0	0.000290289	5.08162e-05	0	0	High
High	[R].LLNINPNK.[T]	1xHexNAc(5)Hex(6)Fuc(1) [N7]	1	P11279	P11279 [255-262]	0	3059.32	HexNAc(5)Hex(6)Fuc(1)	0	255	7	305.6	132.3	132.3	9.91346e-08	1.66909e-08	0	0	0.000215568	3.70912e-05	0	0	High
High	[R].LLNINPNK.[T]	1xHexNAc(4)Hex(5)Fuc(1)NeuAc(1) [N7]	1	P11279	P11279 [255-262]	0	2985.28	HexNAc(4)Hex(5)Fuc(1)NeuAc(1)	0	255	6.96	338.5	112.8	112.8	1.08452e-07	1.89531e-08	0	0	0.000235824	4.21164e-05	0	0	High
High	[R].LLNINPNK.[T]	1xHexNAc(5)Hex(6)Fuc(1)NeuAc(1) [N7]	2	P11279	P11279 [255-262]	0	3350.41	HexNAc(5)Hex(6)Fuc(1)NeuAc(1)	0	255	6.96	340.4	130.8	130.8	1.08452e-07	1.85011e-08	0	0	0.000235824	4.11127e-05	0	0	High
High	[R].LLNINPNK.[T]	1xHexNAc(5)Hex(6) [N7]	2	P11279	P11279 [255-262]	0	2913.26	HexNAc(5)Hex(6)	0	255	6.9	236.7	114.5	114.5	1.2587e-07	2.18151e-08	0	0	0.000273687	4.8468e-05	0	0	High
High	[R].LLNINPNK.[T]	1xHexNAc(5)Hex(6)Fuc(1)NeuAc(2) [N7]	1	P11279	P11279 [255-262]	0	3641.51	HexNAc(5)Hex(6)Fuc(1)NeuAc(2)	0	255	6.89	284.7	104.9	104.9	1.29227e-07	2.23365e-08	0	0	0.000280984	4.96248e-05	0	0	High
High	[R].LLNINPNK.[T]	1xHexNAc(6)Hex(7)Fuc(1) [N7]	1	P11279	P11279 [255-262]	0	3424.45	HexNAc(6)Hex(7)Fuc(1)	0	255	6.54	237.2	70.8	70.8	2.86503e-07	4.77278e-08	0	0	0.00062275	0.000105853	0	0	High
High	[R].LLNINPNK.[T]	1xHexNAc(5)Hex(6)NeuAc(1) [N7]	1	P11279	P11279 [255-262]	0	3204.36	HexNAc(5)Hex(6)NeuAc(1)	0	255	6.42	249.8	76.4	76.4	3.79159e-07	5.9286e-08	0	0	0.000823985	0.000131401	0	0	High
High	[R].LLNINPNK.[T]	1xHexNAc(6)Hex(7)NeuAc(1) [N7]	1	P11279	P11279 [255-262]	0	3569.49	HexNAc(6)Hex(7)NeuAc(1)	0	255	6.25	242.6	54.9	54.9	5.59856e-07	6.9597e-08	0	0	0.0012162	0.000151405	0	0	High
High	[R].LLNINPNK.[T]	1xHexNAc(7)Hex(8)Fuc(1) [N7]	3	P11279	P11279 [255-262]	0	3789.58	HexNAc(7)Hex(8)Fuc(1)	0	255	5.85	281.4	101.9	101.9	1.42124e-06	1.09546e-07	0	0	0.00308175	0.000250408	0	0	High
High	[R].LLNINPNK.[T]	1xHexNAc(6)Hex(7)Fuc(1)NeuAc(1) [N7]	3	P11279	P11279 [255-262]	0	3715.55	HexNAc(6)Hex(7)Fuc(1)NeuAc(1)	0	255	5.57	264.4	41.3	41.3	2.6961e-06	1.79587e-07	0	0	0.00583025	0.00378788	0.00364963	0.00403226	High
High	[R].LLNINPNK.[T]	1xHexNAc(4)Hex(5)Fuc(1) [N7]	1	P11279	P11279 [255-262]	0	2694.19	HexNAc(4)Hex(5)Fuc(1)	0	255	5.26	200.9	112.7	112.7	5.50053e-06	3.83465e-07	0	0	0.0118242	0.00378788	0.00342466	0.00378788	High
High	[R].LLNINPNK.[T]	1xHexNAc(4)Hex(5)Fuc(1)NeuAc(2) [N7]	1	P11279	P11279 [255-262]	0	3276.38	HexNAc(4)Hex(5)Fuc(1)NeuAc(2)	0	255	4.91	229.1	70.2	70.2	1.22442e-05	1.106e-06	0	0	0.0259504	0.0151515	0.0151057	0.0167224	High
High	[R].LLNINPNK.[T]	1xHexNAc(3)Hex(6)NeuAc(1) [N7]	1	P11279	P11279 [255-262]	0	2798.2	HexNAc(3)Hex(6)NeuAc(1)	0	255	4.53	191.3	54.8	54.8	2.97977e-05	2.2608e-06	0	0	0.0609219	0.0151515	0.0140449	0.0157233	High
High	[R].LLNINPNK.[T]	1xHexNAc(7)Hex(8)Fuc(1)NeuAc(1) [N7]	2	P11279	P11279 [255-262]	0	4080.68	HexNAc(7)Hex(8)Fuc(1)NeuAc(1)	0	255	3.44	92.8	36.6	36.6	0.000366031	2.81852e-05	0	0	0.439789	0.0709534	0.0691145	0.0746988	High
High	[R].LLNINPNK.[T]	1xHexNAc(6)Hex(7)Fuc(1)NeuAc(2) [N7]	2	P11279	P11279 [255-262]	0	4006.64	HexNAc(6)Hex(7)Fuc(1)NeuAc(2)	0	255	3.42	210.9	34.8	34.8	0.000383689	3.85517e-05	0	0	0.451867	0.0791075	0.0789474	0.0857788	High
High	[R].LLNINPNK.[T]	1xHexNAc(6)Hex(7) [N7]	1	P11279	P11279 [255-262]	0	3278.39	HexNAc(6)Hex(7)	0	255	6.16	242.2	56.6	56.6	6.99811e-07	6.63463e-08	0	0	0.00361431	0.000348408	0	0	High
High	[R].LLNINPNK.[T]	1xHexNAc(4)Hex(5)NeuAc(1) [N7]	1	P11279	P11279 [255-262]	0	2839.22	HexNAc(4)Hex(5)NeuAc(1)	0	255	4.56	179.6	51.6	51.6	2.73743e-05	2.20344e-06	0	0	0.123915	0.0134376	0.00714285	0.00796812	High
High	[R].LLNINPNK.[T]	1xHexNAc(4)Hex(5)NeuAc(2) [N7]	1	P11279	P11279 [255-262]	0	3130.32	HexNAc(4)Hex(5)NeuAc(2)	0	255	4.14	174.8	59.9	59.9	7.30576e-05	7.61153e-06	0	0	0.273337	0.0682113	0.0544959	0.0604229	High
High	[R].LLNINPNK.[T]	1xHexNAc(8)Hex(9)Fuc(1) [N7]	1	P11279	P11279 [255-262]	0	4154.71	HexNAc(8)Hex(9)Fuc(1)	1	255	2.82	113.2	0.7	0.7	0.00152529	9.53402e-05	0	0	0.884112	0.349907	0.2	0.220751	High
High	[R].LLNINPNK.[T]	1xHexNAc(3)Hex(6) [N7]	1	P11279	P11279 [255-262]	0	2507.1	HexNAc(3)Hex(6)	0	255	1.89	77.7	8.8	8.8	0.0130206	0.00250627	0.00247525	0.00297619	0.984426	0.927952	0.428419	0.459242	High
High	[R].LLNINPNK.[T]	1xHexNAc(2)Hex(8) [N7]	2	P11279	P11279 [255-262]	0	2628.13	HexNAc(2)Hex(8)	0	255	1.89	84.6	32.5	32.5	0.0130206	0.00250627	0.00248139	0.00298507	0.984426	0.926839	0.427807	0.458621	High
High	[R].LNPTVTYGNDSFSAK.[A]	1xHexNAc(6)Hex(7)Fuc(1)NeuAc(3) [N9]	1	P05362	P05362 [259-273]	0	4985.97	HexNAc(6)Hex(7)Fuc(1)NeuAc(3)	0	259	7.91	482.1	329.4	328.8	1.21991e-08	2.44004e-09	0	0	2.65317e-05	5.25828e-06	0	0	High
High	[R].LNPTVTYGNDSFSAK.[A]	1xHexNAc(5)Hex(6)Fuc(1)NeuAc(3) [N9]	1	P05362	P05362 [259-273]	0	4620.84	HexNAc(5)Hex(6)Fuc(1)NeuAc(3)	0	259	3.86	154.8	29	29	0.000138551	7.61828e-06	0	0	0.229255	0.026178	0.0260417	0.0292398	High
High	[R].LNPTVTYGNDSFSAK.[A]	1xHexNAc(7)Hex(8)Fuc(1)NeuAc(2) [N9]	1	P05362	P05362 [259-273]	0	5060.01	HexNAc(7)Hex(8)Fuc(1)NeuAc(2)	1	259	2.38	20.4	2.1	2.1	0.00414326	0.00232558	0.00218341	0.00259067	0.897634	0.271447	0.2711	0.2879	High
High	[R].LNPTVTYGNDSFSAK.[A]	1xHexNAc(5)Hex(6)Fuc(1)NeuAc(2) [N9]	1	P05362	P05362 [259-273]	0	4329.74	HexNAc(5)Hex(6)Fuc(1)NeuAc(2)	0	259	8.13	470	236.3	236.3	7.48902e-09	2.28619e-09	0	0	3.88144e-05	1.17299e-05	0	0	High
High	[R].LNSSTIK.[Y]	1xHexNAc(5)Hex(6)NeuAc(1) [N2]	1	P13473	P13473 [274-280]	0	3041.24	HexNAc(5)Hex(6)NeuAc(1)	0	274	5.46	321.7	4.2	4.2	3.43831e-06	2.61044e-07	0	0	0.00742352	0.00378788	0.00355872	0.00393701	High
High	[R].LNWTK.[P]	1xHexNAc(6)Hex(6)Fuc(1)NeuAc(2) [N2]	1	Q8WZ42	Q8WZ42 [14929-14933]	0	3580.41	HexNAc(6)Hex(6)Fuc(1)NeuAc(2)	0	14929	1.19	90	0.5	0.5	0.0644693	0.00928074	0.00869565	0.0105541	0.996379	1	0.497627	0.525566	High
High	[R].MGFNASSMLR.[K]	1xOxidation [M1]; 1xHexNAc(5)Hex(6)NeuAc(2) [N4]	1	Q8WV16	Q8WV16 [121-130]	0	3699.42	HexNAc(5)Hex(6)NeuAc(2)	0	21	2.55	283.8	11.7	11.7	0.00280176	0.00232558	0.00220264	0.0026178	0.00466817	0.00378788	0.00369004	0.00408163	High
High	[R].MNITVK.[N]	1xHexNAc(6)Hex(7)Fuc(1)NeuAc(3) [N2]	1	P26006	P26006 [106-111]	0	4077.59	HexNAc(6)Hex(7)Fuc(1)NeuAc(3)	0	106	3.42	179.8	10.1	10.1	0.000383689	3.60139e-05	0	0	0.451867	0.0778688	0.0777096	0.0842824	High
High	[R].MNITVK.[N]	1xHexNAc(5)Hex(6)Fuc(1)NeuAc(1) [N2]	1	P26006	P26006 [106-111]	0	3130.26	HexNAc(5)Hex(6)Fuc(1)NeuAc(1)	0	106	3.42	221.2	4.2	4.2	0.000383689	3.51597e-05	0	0	0.451867	0.0764463	0.0762886	0.0827586	High
High	[R].MNITVK.[N]	1xHexNAc(5)Hex(6)Fuc(1)NeuAc(2) [N2]	2	P26006	P26006 [106-111]	0	3421.36	HexNAc(5)Hex(6)Fuc(1)NeuAc(2)	0	106	3.12	224.9	10.7	10.7	0.000752605	5.38498e-05	0	0	0.617033	0.115732	0.114082	0.122288	High
High	[R].MNITVK.[N]	1xHexNAc(4)Hex(5)Fuc(1)NeuAc(2) [N2]	1	P26006	P26006 [106-111]	0	3056.23	HexNAc(4)Hex(5)Fuc(1)NeuAc(2)	0	106	3.12	185.5	5.6	5.6	0.000752605	5.54939e-05	0	0	0.617033	0.115865	0.115658	0.124016	High
High	[R].MNITVK.[N]	1xHexNAc(5)Hex(6)Fuc(1)NeuAc(3) [N2]	1	P26006	P26006 [106-111]	0	3712.45	HexNAc(5)Hex(6)Fuc(1)NeuAc(3)	0	106	2.66	198.1	38	38	0.00216948	0.00232558	0.00222717	0.00265252	0.821903	0.201471	0.200586	0.211878	High
High	[R].MNITVK.[N]	1xHexNAc(7)Hex(8)Fuc(1)NeuAc(1) [N2]	1	P26006	P26006 [106-111]	0	3860.53	HexNAc(7)Hex(8)Fuc(1)NeuAc(1)	0	106	2.78	106.9	2.3	2.3	0.00165086	0.00014989	0	0	0.891941	0.487853	0.247834	0.271863	High
High	[R].MSVINFECNK.[T]	1xCarbamidomethyl [C8]; 1xHexNAc(5)Hex(6)Fuc(1)NeuAc(2) [N9]	1	P11717	P11717 [427-436]	0	3957.53	HexNAc(5)Hex(6)Fuc(1)NeuAc(2)	0	427	7.71	418	197.2	197.2	1.95978e-08	4.31088e-09	0	0	4.26225e-05	9.49727e-06	0	0	High
High	[R].MSVINFECNK.[T]	1xCarbamidomethyl [C8]; 1xHexNAc(5)Hex(6)Fuc(1)NeuAc(1) [N9]	1	P11717	P11717 [427-436]	0	3666.43	HexNAc(5)Hex(6)Fuc(1)NeuAc(1)	0	427	7.62	387.4	182.7	182.7	2.38572e-08	5.52756e-09	0	0	5.18857e-05	1.22324e-05	0	0	High
High	[R].MSVINFECNK.[T]	1xCarbamidomethyl [C8]; 1xHexNAc(5)Hex(6)Fuc(1)NeuAc(3) [N9]	2	P11717	P11717 [427-436]	0	4248.62	HexNAc(5)Hex(6)Fuc(1)NeuAc(3)	0	427	7.42	292.7	138	138	3.82694e-08	9.35856e-09	0	0	8.32275e-05	2.07915e-05	0	0	High
High	[R].MSVINFECNK.[T]	1xHexNAc(4)Hex(5)Fuc(1)NeuAc(2) [N9]; 1xCarbamidomethyl [C8]	1	P11717	P11717 [427-436]	0	3592.4	HexNAc(4)Hex(5)Fuc(1)NeuAc(2)	0	427	7.33	277.1	103	103	4.67715e-08	1.18299e-08	0	0	0.000101716	2.62883e-05	0	0	High
High	[R].MSVINFECNK.[T]	1xCarbamidomethyl [C8]; 1xHexNAc(4)Hex(5)Fuc(1)NeuAc(1) [N9]	1	P11717	P11717 [427-436]	0	3301.3	HexNAc(4)Hex(5)Fuc(1)NeuAc(1)	0	427	7.22	265.2	131	131	6.03046e-08	1.30207e-08	0	0	0.000131143	2.89349e-05	0	0	High
High	[R].MSVINFECNK.[T]	1xCarbamidomethyl [C8]; 1xHexNAc(6)Hex(7)Fuc(1)NeuAc(1) [N9]	1	P11717	P11717 [427-436]	0	4031.56	HexNAc(6)Hex(7)Fuc(1)NeuAc(1)	0	427	6.69	238.5	52.2	52.2	2.02814e-07	3.2852e-08	0	0	0.00044092	7.29293e-05	0	0	High
High	[R].MSVINFECNK.[T]	1xCarbamidomethyl [C8]; 1xHexNAc(4)Hex(5)NeuAc(2) [N9]	1	P11717	P11717 [427-436]	0	3446.34	HexNAc(4)Hex(5)NeuAc(2)	0	427	3.57	158.9	19	19	0.000267663	2.00758e-05	0	0	0.364217	0.0638298	0.0625	0.0673575	High
High	[R].NATR.[Y]	1xHexNAc(5)Hex(6)Fuc(1)NeuAc(2) [N1]	1	P11279	P11279 [107-110]	0	3177.21	HexNAc(5)Hex(6)Fuc(1)NeuAc(2)	0	107	2.82	170.4	17.7	17.7	0.00152529	6.60723e-05	0	0	0.884112	0.323426	0.188139	0.208145	High
High	[R].NATR.[Y]	1xHexNAc(6)Hex(10)Fuc(1)NeuAc(1) [N1]	1	P11279	P11279 [107-110]	0	3737.4	HexNAc(6)Hex(10)Fuc(1)NeuAc(1)	0	107	1.8	80.9	0.2	0.2	0.0158563	0.00485437	0.00479616	0.00578035	0.987057	0.983833	0.44685	0.476842	High
High	[R].NCTCK.[S]	2xCarbamidomethyl [C2; C4]; 1xHexNAc(6)Hex(7)Fuc(1)NeuAc(1) [N1]	1	Q92832	Q92832 [294-298]	0	3472.26	HexNAc(6)Hex(7)Fuc(1)NeuAc(1)	0	294	1.09	149.1	44.5	44.5	0.0804727	0.00928074	0.00858369	0.0104712	0.134101	0.0158264	0.006993	0.0077821	High
High	[R].NGTQLR.[K]	1xHexNAc(2)Hex(6) [N1]	1	A6NHM9	A6NHM9 [404-409]	0	2066.85	HexNAc(2)Hex(6)	0	404	2.1	236.4	15.5	15.5	0.00787091	0.000469522	0	0	0.0262243	0.00232368	0	0	High
High	[R].NLSISTK.[N]	1xHexNAc(6)Hex(7)NeuAc(2) [N1]	1	A8K979	A8K979 [674-680]	0	3697.47	HexNAc(6)Hex(7)NeuAc(2)	0	674	2.26	271.3	14.2	14.2	0.00547083	0.000328531	0	0	0.0182277	0.0015167	0	0	High
High	[R].NNSNNFDLNR.[N]	1xHexNAc(3)Hex(6)NeuAc(1) [N1]	1	O75976	O75976 [626-635]	0	3080.2	HexNAc(3)Hex(6)NeuAc(1)	0	626	6.86	235.9	72	72	1.37303e-07	2.34237e-08	0	0	0.000298539	5.20365e-05	0	0	High
High	[R].NPCTSEQNCTSPFSYK.[N]	2xCarbamidomethyl [C3; C9]; 1xHexNAc(2)Hex(8) [N8]	1	P05556	P05556 [205-220]	0	3622.37	HexNAc(2)Hex(8)	0	205	11.98	683	513.9	513.9	1.05375e-12	1.49238e-13	0	0	2.29185e-09	2.79275e-10	0	0	High
High	[R].NPCTSEQNCTSPFSYK.[N]	2xCarbamidomethyl [C3; C9]; 1xHexNAc(2)Hex(7) [N8]	1	P05556	P05556 [205-220]	0	3460.32	HexNAc(2)Hex(7)	0	205	11.98	669	445.2	445.2	1.05375e-12	1.82738e-13	0	0	2.29185e-09	3.59778e-10	0	0	High
High	[R].NPCTSEQNCTSPFSYK.[N]	2xCarbamidomethyl [C3; C9]; 1xHexNAc(2)Hex(9) [N8]	1	P05556	P05556 [205-220]	0	3784.42	HexNAc(2)Hex(9)	0	205	9.98	592.6	439.5	439.5	1.05375e-10	1.36454e-11	0	0	2.29185e-07	2.97188e-08	0	0	High
High	[R].NPCTSEQNCTSPFSYK.[N]	2xCarbamidomethyl [C3; C9]; 1xHexNAc(4)Hex(5)Fuc(1)NeuAc(1) [N8]	2	P05556	P05556 [205-220]	0	3979.52	HexNAc(4)Hex(5)Fuc(1)NeuAc(1)	0	205	7.7	401.3	245.3	245.3	2.00068e-08	4.4307e-09	0	0	4.35121e-05	9.76723e-06	0	0	High
High	[R].NPCTSEQNCTSPFSYK.[N]	2xCarbamidomethyl [C3; C9]; 1xHexNAc(6)Hex(7)Fuc(1)NeuAc(2) [N8]	1	P05556	P05556 [205-220]	0	5000.88	HexNAc(6)Hex(7)Fuc(1)NeuAc(2)	0	205	7.55	358.6	281.1	115.7	2.82805e-08	6.92183e-09	0	0	6.15051e-05	1.53547e-05	0	0	High
High	[R].NPCTSEQNCTSPFSYK.[N]	2xCarbamidomethyl [C3; C9]; 1xHexNAc(4)Hex(5)Fuc(1) [N8]	1	P05556	P05556 [205-220]	0	3688.43	HexNAc(4)Hex(5)Fuc(1)	0	205	7.36	279.2	126.4	126.4	4.3795e-08	1.12365e-08	0	0	9.52433e-05	2.49699e-05	0	0	High
High	[R].NPCTSEQNCTSPFSYK.[N]	2xCarbamidomethyl [C3; C9]; 1xHexNAc(6)Hex(7)Fuc(1)NeuAc(3) [N8]	1	P05556	P05556 [205-220]	0	5291.98	HexNAc(6)Hex(7)Fuc(1)NeuAc(3)	0	205	5.45	188.2	139.4	40.1	3.5311e-06	2.72438e-07	0	0	0.00762236	0.00378788	0.0035461	0.00392157	High
High	[R].NPCTSEQNCTSPFSYK.[N]	2xCarbamidomethyl [C3; C9]; 1xHexNAc(7)Hex(8)Fuc(1)NeuAc(2) [N8]	1	P05556	P05556 [205-220]	0	5366.02	HexNAc(7)Hex(8)Fuc(1)NeuAc(2)	1	205	3.47	89.6	44	41.6	0.000337861	2.15218e-05	0	0	0.419424	0.0638298	0.0617849	0.0664961	High
High	[R].NPCTSEQNCTSPFSYK.[N]	2xCarbamidomethyl [C3; C9]; 1xHexNAc(5)Hex(6)Fuc(1)NeuAc(1) [N8]	1	P05556	P05556 [205-220]	0	4344.66	HexNAc(5)Hex(6)Fuc(1)NeuAc(1)	0	205	2.57	195.1	95.6	95.6	0.00268223	0.00232558	0.00220751	0.00262467	0.850692	0.224828	0.224518	0.237237	High
High	[R].NPCTSEQNCTSPFSYK.[N]	2xCarbamidomethyl [C3; C9]; 1xHexNAc(6)Hex(7)Fuc(1)NeuAc(1) [N8]	1	P05556	P05556 [205-220]	0	4709.79	HexNAc(6)Hex(7)Fuc(1)NeuAc(1)	0	205	9.1	531.4	386.8	79.9	7.86945e-10	1.16857e-10	0	0	4.07875e-06	6.09378e-07	0	0	High
High	[R].NPCTSEQNCTSPFSYK.[N]	2xCarbamidomethyl [C3; C9]; 1xHexNAc(2)Hex(6) [N8]	1	P05556	P05556 [205-220]	0	3298.27	HexNAc(2)Hex(6)	0	205	8.5	467.6	342.4	342.4	3.15435e-09	7.23519e-10	0	0	1.63489e-05	3.76443e-06	0	0	High
High	[R].NPCTSEQNCTSPFSYK.[N]	1xHexNAc(5)Hex(6)Fuc(1)NeuAc(2) [N8]; 2xCarbamidomethyl [C3; C9]	2	P05556	P05556 [205-220]	0	4635.75	HexNAc(5)Hex(6)Fuc(1)NeuAc(2)	0	205	8.16	430.8	293.8	110.1	6.8787e-09	1.89771e-09	0	0	3.56514e-05	9.58069e-06	0	0	High
High	[R].NPCTSEQNCTSPFSYK.[N]	2xCarbamidomethyl [C3; C9]; 1xHexNAc(6)Hex(7)Fuc(1) [N8]	1	P05556	P05556 [205-220]	0	4418.69	HexNAc(6)Hex(7)Fuc(1)	0	205	8	409.5	268.1	123.8	9.90387e-09	3.95666e-09	0	0	5.13296e-05	2.07892e-05	0	0	High
High	[R].NPCTSEQNCTSPFSYK.[N]	2xCarbamidomethyl [C3; C9]; 1xHexNAc(2)Hex(10) [N8]	1	P05556	P05556 [205-220]	0	3946.48	HexNAc(2)Hex(10)	0	205	7.98	294.7	196.7	196.7	1.05642e-08	4.12465e-09	0	0	5.47516e-05	2.16883e-05	0	0	High
High	[R].NPCTSEQNCTSPFSYK.[N]	2xCarbamidomethyl [C3; C9]; 1xHexNAc(5)Hex(6)Fuc(1)NeuAc(3) [N8]	1	P05556	P05556 [205-220]	0	4926.85	HexNAc(5)Hex(6)Fuc(1)NeuAc(3)	1	205	7.73	342.6	224.9	16.7	1.85185e-08	7.0901e-09	0	0	9.5973e-05	3.74242e-05	0	0	High
High	[R].NPCTSEQNCTSPFSYK.[N]	2xCarbamidomethyl [C3; C9]; 1xHexNAc(4)Hex(5)Fuc(1)NeuAc(2) [N8]	1	P05556	P05556 [205-220]	0	4270.62	HexNAc(4)Hex(5)Fuc(1)NeuAc(2)	1	205	5.8	195.8	107.9	1.4	1.60112e-06	1.35224e-07	0	0	0.00823176	0.000707982	0	0	High
High	[R].NPCTSEQNCTSPFSYK.[N]	2xCarbamidomethyl [C3; C9]; 1xHexNAc(7)Hex(8)Fuc(1)NeuAc(1) [N8]	1	P05556	P05556 [205-220]	0	5074.92	HexNAc(7)Hex(8)Fuc(1)NeuAc(1)	1	205	4.52	132.6	52.3	52.3	3.01217e-05	2.49531e-06	0	0	0.134587	0.0162402	0.00696864	0.00775193	High
High	[R].NPCTSEQNCTSPFSYK.[N]	2xCarbamidomethyl [C3; C9]; 1xHexNAc(5)Hex(5)NeuAc(1) [N8]	1	P05556	P05556 [205-220]	0	4036.55	HexNAc(5)Hex(5)NeuAc(1)	-1	205	2.4	33.1	3.1	3.1	0.00395989	0.000278686	0	0	0.951629	0.696279	0.341326	0.372881	High
High	[R].NTTEVVNTMCGYK.[T]	1xCarbamidomethyl [C10]; 1xHexNAc(4)Hex(5)Fuc(1)NeuAc(1) [N1]	1	O95858	O95858 [189-201]	0	3576.41	HexNAc(4)Hex(5)Fuc(1)NeuAc(1)	0	189	1.98	167.3	54.8	54.8	0.0105514	0.00423729	0.00416667	0.00493827	0.0175801	0.00682594	0.00641025	0.00711744	High
High	[R].NTTIPTK.[Q]	1xHexNAc(5)Hex(6)NeuAc(1) [N1]	1	P11142	P11142 [417-423]	0	3053.24	HexNAc(5)Hex(6)NeuAc(1)	0	417	2.6	245.1	47.2	47.2	0.00250273	0.00232558	0.00222222	0.0026455	0.00625248	0.00378788	0.00362319	0.004	High
High	[R].NTTPLPRPPPGLTNPK.[P]	1xHexNAc(5)Hex(4)NeuAc(2) [N1]	1	Q9UPQ9	Q9UPQ9 [1594-1609]	0	3945.75	HexNAc(5)Hex(4)NeuAc(2)	0	1594	2.18	121.2	73.7	73.7	0.00659922	0.00041721	0	0	0.0219873	0.00176026	0	0	High
High	[R].NTTPNFVR.[C]	1xHexNAc(7)Hex(6)Fuc(1)NeuAc(4) [N1]	1	P35749	P35749 [670-677]	0	4652.8	HexNAc(7)Hex(6)Fuc(1)NeuAc(4)	1	670	1.19	94.4	13.4	13.4	0.0644693	0.00928074	0.0087146	0.010582	0.996379	1	0.498415	0.526448	High
High	[R].NVTR.[L]	1xHexNAc(7)Hex(6)Fuc(1)NeuAc(4) [N1]	1	P05556	P05556 [269-272]	0	4193.59	HexNAc(7)Hex(6)Fuc(1)NeuAc(4)	1	269	1.31	48	0.6	0.6	0.0488482	0.00928074	0.00909091	0.0110497	0.995285	1	0.481057	0.5103	High
High	[R].RDHHGANFSCR.[T]	1xCarbamidomethyl [C10]; 1xHexNAc(5)Hex(6)Fuc(1)NeuAc(2) [N7]	1	P05362	P05362 [177-187]	1	4072.56	HexNAc(5)Hex(6)Fuc(1)NeuAc(2)	1	177	6.8	312.3	201.3	114.6	1.59529e-07	2.73813e-08	0	0	0.000346849	6.08095e-05	0	0	High
High	[R].RDHHGANFSCR.[T]	1xCarbamidomethyl [C10]; 1xHexNAc(8)Hex(9) [N7]	1	P05362	P05362 [177-187]	1	4439.71	HexNAc(8)Hex(9)	0	177	1.98	115.4	47.6	47.6	0.0105313	0.00056442	0	0	0.980944	0.900586	0.413377	0.444575	High
High	[R].SADDGTQTHSENSSQENR.[I]	1xDeamidated [Q15]; 1xHexNAc(2)Fuc(1) [N12]	3	A4IF30	A4IF30 [132-149]	0	2516	HexNAc(2)Fuc(1)	0	132	2.01	235.6	98	11.3	0.00981065	0.00423729	0.00417536	0.00495049	0.016346	0.00682594	0.00655737	0.00724637	High
High	[R].SASADNLTLPR.[W]	1xHexNAc(5)Hex(5)NeuAc(2) [N6]	2	Q8ND76	Q8ND76 [324-334]	0	3552.45	HexNAc(5)Hex(5)NeuAc(2)	0	324	6.1	273	143.4	143.4	7.96654e-07	7.33373e-08	0	0	0.00411245	0.000384992	0	0	High
High	[R].SASADNLTLPR.[W]	1xHexNAc(3)Hex(4)Fuc(1) [N6]	2	Q8ND76	Q8ND76 [324-334]	0	2548.1	HexNAc(3)Hex(4)Fuc(1)	0	324	4.29	181.9	127.1	127.1	5.13591e-05	5.74574e-06	0	0	0.209132	0.0474535	0.0355029	0.0392157	High
High	[R].SASADNLTLPR.[W]	1xHexNAc(9)Hex(4) [N6]	1	Q8ND76	Q8ND76 [324-334]	0	3620.52	HexNAc(9)Hex(4)	0	324	4.15	179.2	69.3	69.3	7.14288e-05	7.39625e-06	0	0	0.268878	0.0676509	0.0546448	0.060606	High
High	[R].SASADNLTLPR.[W]	1xHexNAc(6)Hex(7)NeuAc(3) [N6]	1	Q8ND76	Q8ND76 [324-334]	0	4370.73	HexNAc(6)Hex(7)NeuAc(3)	0	324	4.12	195.7	77.6	77.6	7.5932e-05	8.26254e-06	0	0	0.281076	0.0704533	0.0539083	0.06006	High
High	[R].SASADNLTLPR.[W]	1xHexNAc(6)Hex(7)NeuAc(1) [N6]	1	Q8ND76	Q8ND76 [324-334]	0	3788.54	HexNAc(6)Hex(7)NeuAc(1)	0	324	2.91	86.1	20.2	20.2	0.00124159	4.3165e-05	0	0	0.861695	0.237246	0.151982	0.168704	High
High	[R].SASADNLTLPR.[W]	1xHexNAc(2)Hex(7) [N6]	1	Q8ND76	Q8ND76 [324-334]	0	2685.12	HexNAc(2)Hex(7)	0	324	2.59	122	33.3	33.3	0.00255844	0.000196942	0	0	0.927308	0.650402	0.317181	0.3456	High
High	[R].SASADNLTLPR.[W]	1xHexNAc(4)Hex(5)NeuAc(1) [N6]	1	Q8ND76	Q8ND76 [324-334]	0	3058.27	HexNAc(4)Hex(5)NeuAc(1)	0	324	2.19	169.3	71.1	71.1	0.00645037	0.000401359	0	0	0.969591	0.792459	0.37218	0.403533	High
High	[R].SASADNLTLPR.[W]	1xHexNAc(5)Hex(6)Fuc(1)NeuAc(1) [N6]	1	Q8ND76	Q8ND76 [324-334]	0	3569.46	HexNAc(5)Hex(6)Fuc(1)NeuAc(1)	0	324	1.2	129.9	80.5	80.5	0.0633422	0.00928074	0.00879121	0.0106952	0.996315	1	0.494694	0.522944	High
High	[R].SSCGKENTSDPSLVIAFGR.[G]	1xCarbamidomethyl [C3]; 1xHexNAc(5)Hex(6)Fuc(1)NeuAc(2) [N7]	1	P11279	P11279 [78-96]	1	4740.93	HexNAc(5)Hex(6)Fuc(1)NeuAc(2)	1	78	3.79	200.8	113.1	62.3	0.000163808	1.16959e-05	0	0	0.260026	0.0493827	0.0492611	0.0524862	High
High	[R].SSCGKENTSDPSLVIAFGR.[G]	1xCarbamidomethyl [C3]; 1xHexNAc(4)Hex(5)Fuc(1)NeuAc(2) [N7]	1	P11279	P11279 [78-96]	1	4375.8	HexNAc(4)Hex(5)Fuc(1)NeuAc(2)	1	78	2.46	106	43.3	43.3	0.00344287	0.000259678	0	0	0.944819	0.685638	0.336182	0.367601	High
High	[R].SSCGKENTSDPSLVIAFGR.[G]	1xCarbamidomethyl [C3]; 1xHexNAc(5)Hex(6)Fuc(1)NeuAc(3) [N7]	1	P11279	P11279 [78-96]	1	5032.03	HexNAc(5)Hex(6)Fuc(1)NeuAc(3)	1	78	2.27	69.7	48.9	9.2	0.00534073	0.00031514	0	0	0.963583	0.733018	0.354054	0.386431	High
High	[R].TASCSNVTCWLK.[D]	2xCarbamidomethyl [C4; C9]; 1xHexNAc(4)Hex(5)Fuc(1)NeuAc(1) [N6]	1	P17301	P17301 [1052-1063]	0	3486.38	HexNAc(4)Hex(5)Fuc(1)NeuAc(1)	0	1052	6.69	238.1	48.8	48.8	2.02814e-07	3.36108e-08	0	0	0.00044092	7.46096e-05	0	0	High
High	[R].TCSSNLTLTSGSK.[H]	1xCarbamidomethyl [C2]; 1xHexNAc(4)Hex(5)Fuc(1)NeuAc(1) [N5]	1	Q9H5V8	Q9H5V8 [382-394]	0	3415.38	HexNAc(4)Hex(5)Fuc(1)NeuAc(1)	0	382	6.72	238	56	56	1.89913e-07	3.13707e-08	0	0	0.000412885	6.96482e-05	0	0	High
High	[R].TCSSNLTLTSGSK.[H]	1xCarbamidomethyl [C2]; 1xHexNAc(4)Hex(5)Fuc(1) [N5]	1	Q9H5V8	Q9H5V8 [382-394]	0	3124.29	HexNAc(4)Hex(5)Fuc(1)	0	382	3.91	125	50.2	50.2	0.000121715	5.18222e-06	0	0	0.207265	0.0242588	0.0239362	0.0267857	High
High	[R].TCSSNLTLTSGSK.[H]	1xCarbamidomethyl [C2]; 1xHexNAc(6)Hex(6)NeuAc(2) [N5]	1	Q9H5V8	Q9H5V8 [382-394]	0	4128.63	HexNAc(6)Hex(6)NeuAc(2)	1	382	3.63	125.4	3.7	3.7	0.000236365	1.32701e-05	0	0	0.336056	0.0493827	0.0485437	0.0516304	High
High	[R].THNLTDLSPHLR.[Y]	1xHexNAc(5)Hex(6)Fuc(1)NeuAc(2) [N3]	1	P32004	P32004 [977-988]	0	4119.7	HexNAc(5)Hex(6)Fuc(1)NeuAc(2)	1	977	3.47	166.8	52.2	49.8	0.000339957	2.3137e-05	0	0	0.420989	0.0638298	0.0615034	0.0663265	High
High	[R].TSIPTINMENK.[T]	1xHexNAc(5)Hex(6)NeuAc(1) [N10]	1	P26006	P26006 [960-970]	0	3526.44	HexNAc(5)Hex(6)NeuAc(1)	0	960	6.98	256.5	75.9	75.9	1.03729e-07	1.71373e-08	0	0	0.000225557	3.80831e-05	0	0	High
High	[R].TSIPTINMENK.[T]	1xHexNAc(4)Hex(5)NeuAc(1) [N10]	1	P26006	P26006 [960-970]	0	3161.31	HexNAc(4)Hex(5)NeuAc(1)	0	960	6.97	272.7	87.6	87.6	1.06496e-07	1.80445e-08	0	0	0.000231572	4.00986e-05	0	0	High
High	[R].TSIPTINMENK.[T]	1xHexNAc(2)Hex(9) [N10]	1	P26006	P26006 [960-970]	0	3112.26	HexNAc(2)Hex(9)	0	960	5.06	190.4	49.5	49.5	8.76835e-06	8.25672e-07	0	0	0.0187193	0.00949367	0.00943396	0.010453	High
High	[R].TSIPTINMENK.[T]	1xHexNAc(5)Hex(6)NeuAc(2) [N10]	1	P26006	P26006 [960-970]	0	3817.53	HexNAc(5)Hex(6)NeuAc(2)	0	960	6.94	294.1	71.4	71.4	1.14475e-07	2.26874e-08	0	0	0.000592986	0.000119434	0	0	High
High	[R].TVLENSTSYEEAK.[N]	1xHexNAc(2)Hex(8) [N5]	1	Q13510	Q13510 [255-267]	0	3173.28	HexNAc(2)Hex(8)	0	255	9.98	585.7	416.3	416.3	1.05375e-10	9.47587e-12	0	0	2.29185e-07	1.99888e-08	0	0	High
High	[R].TVLENSTSYEEAK.[N]	1xHexNAc(2)Hex(7) [N5]	1	Q13510	Q13510 [255-267]	0	3011.22	HexNAc(2)Hex(7)	0	255	7.69	312.6	195.5	195.5	2.06432e-08	4.55352e-09	0	0	4.4896e-05	1.00438e-05	0	0	High
High	[R].VFGSQNLTTVK.[L]	1xHexNAc(2)Hex(9) [N6]	1	Q9Y4L1	Q9Y4L1 [510-520]	0	3058.29	HexNAc(2)Hex(9)	0	510	7.5	393.2	175.8	175.8	3.15815e-08	7.70583e-09	0	0	6.86837e-05	1.71065e-05	0	0	High
High	[R].VFGSQNLTTVK.[L]	1xHexNAc(2)Hex(8) [N6]	1	Q9Y4L1	Q9Y4L1 [510-520]	0	2896.23	HexNAc(2)Hex(8)	0	510	4.94	191	43.4	43.4	1.15003e-05	1.07141e-06	0	0	0.0244116	0.0123077	0.0121212	0.0134228	High
High	[R].VQPFNVTQGK.[Y]	1xHexNAc(3)Hex(6)NeuAc(1) [N5]	2	P13473	P13473 [352-361]	0	2990.25	HexNAc(3)Hex(6)NeuAc(1)	0	352	7.92	476.2	199.9	199.9	1.20615e-08	2.35132e-09	0	0	2.62326e-05	5.05568e-06	0	0	High
High	[R].VQPFNVTQGK.[Y]	1xHexNAc(4)Hex(5)NeuAc(1) [N5]	1	P13473	P13473 [352-361]	0	3031.28	HexNAc(4)Hex(5)NeuAc(1)	0	352	7.58	404.6	160.8	160.8	2.60956e-08	5.93493e-09	0	0	5.67536e-05	1.31459e-05	0	0	High
High	[R].VQPFNVTQGK.[Y]	1xHexNAc(2)Hex(7) [N5]	1	P13473	P13473 [352-361]	0	2658.13	HexNAc(2)Hex(7)	0	352	7.45	315.9	128.1	128.1	3.5878e-08	8.49337e-09	0	0	7.80269e-05	1.88633e-05	0	0	High
High	[R].VQPFNVTQGK.[Y]	1xHexNAc(4)Hex(5)Fuc(1)NeuAc(1) [N5]	1	P13473	P13473 [352-361]	0	3177.33	HexNAc(4)Hex(5)Fuc(1)NeuAc(1)	0	352	7.41	363.2	123.4	123.4	3.92509e-08	9.53864e-09	0	0	8.53618e-05	2.11925e-05	0	0	High
High	[R].VQPFNVTQGK.[Y]	1xHexNAc(3)Hex(5)NeuAc(1) [N5]	2	P13473	P13473 [352-361]	0	2828.2	HexNAc(3)Hex(5)NeuAc(1)	0	352	7.38	380.9	145.9	145.9	4.20521e-08	1.01101e-08	0	0	9.14533e-05	2.2465e-05	0	0	High
High	[R].VQPFNVTQGK.[Y]	1xHexNAc(2)Hex(8) [N5]	1	P13473	P13473 [352-361]	0	2820.18	HexNAc(2)Hex(8)	0	352	7.38	376.2	158	158	4.20521e-08	9.91997e-09	0	0	9.14533e-05	2.20418e-05	0	0	High
High	[R].VQPFNVTQGK.[Y]	1xHexNAc(4)Hex(5)NeuAc(2) [N5]	1	P13473	P13473 [352-361]	0	3322.37	HexNAc(4)Hex(5)NeuAc(2)	0	352	6.56	294.4	49.5	49.5	2.75584e-07	4.46925e-08	0	0	0.00059903	9.91398e-05	0	0	High
High	[R].VQPFNVTQGK.[Y]	1xHexNAc(5)Hex(6)Fuc(1)NeuAc(1) [N5]	1	P13473	P13473 [352-361]	0	3542.47	HexNAc(5)Hex(6)Fuc(1)NeuAc(1)	0	352	5.29	244.9	44.5	44.5	5.18432e-06	3.49412e-07	0	0	0.0111519	0.00378788	0.00344827	0.00381679	High
High	[R].VQPFNVTQGK.[Y]	1xHexNAc(2)Hex(6) [N5]	1	P13473	P13473 [352-361]	0	2496.08	HexNAc(2)Hex(6)	0	352	5.22	206.4	83.8	83.8	5.99055e-06	4.56587e-07	0	0	0.0128642	0.00682594	0.006734	0.00746268	High
High	[R].VQPFNVTQGK.[Y]	1xHexNAc(5)Hex(6)NeuAc(2) [N5]	1	P13473	P13473 [352-361]	0	3687.5	HexNAc(5)Hex(6)NeuAc(2)	0	352	3.81	226.9	27.9	27.9	0.000154327	1.09057e-05	0	0	0.248779	0.0304568	0.0301507	0.0338983	High
High	[R].VQPFNVTQGK.[Y]	1xHexNAc(5)Hex(6)NeuAc(1) [N5]	1	P13473	P13473 [352-361]	0	3396.41	HexNAc(5)Hex(6)NeuAc(1)	0	352	3.57	122.2	11	11	0.000267663	1.81516e-05	0	0	0.364217	0.0638298	0.0632318	0.0682415	High
High	[R].VQPFNVTQGK.[Y]	1xHexNAc(4)Hex(5)Fuc(1) [N5]	1	P13473	P13473 [352-361]	0	2886.24	HexNAc(4)Hex(5)Fuc(1)	0	352	2.19	48.2	14.7	14.7	0.00642332	0.00232558	0.00212766	0.00252525	0.931171	0.296251	0.295537	0.313725	High
High	[R].VQPFNVTQGK.[Y]	1xHexNAc(5)Hex(6)Fuc(1)NeuAc(2) [N5]	2	P13473	P13473 [352-361]	0	3833.56	HexNAc(5)Hex(6)Fuc(1)NeuAc(2)	0	352	7.75	411.1	100.1	100.1	1.76709e-08	6.65513e-09	0	0	9.15809e-05	3.51282e-05	0	0	High
High	[R].VQPFNVTQGK.[Y]	1xHexNAc(4)Hex(5)Fuc(1)NeuAc(2) [N5]	1	P13473	P13473 [352-361]	0	3468.43	HexNAc(4)Hex(5)Fuc(1)NeuAc(2)	0	352	7.45	317.8	86.6	86.6	3.53333e-08	9.62514e-09	0	0	0.000183101	5.08053e-05	0	0	High
High	[R].VQPFNVTQGK.[Y]	1xHexNAc(3)Hex(4)NeuAc(1) [N5]	1	P13473	P13473 [352-361]	0	2666.14	HexNAc(3)Hex(4)NeuAc(1)	0	352	4.34	147.1	15.7	15.7	4.53957e-05	4.2664e-06	0	0	0.189503	0.028409	0.0162338	0.0180505	High
High	[R].VTGLNCTTNHPINPK.[G]	1xHexNAc(4)Hex(5)Fuc(1)NeuAc(2) [N5]; 1xCarbamidomethyl [C6]	1	P08648	P08648 [864-878]	0	4016.67	HexNAc(4)Hex(5)Fuc(1)NeuAc(2)	0	864	7.36	333.3	108.5	108.5	4.35504e-08	1.08615e-08	0	0	9.47114e-05	2.41365e-05	0	0	High
High	[R].VTGLNCTTNHPINPK.[G]	1xCarbamidomethyl [C6]; 1xHexNAc(4)Hex(5)Fuc(1)NeuAc(1) [N5]	1	P08648	P08648 [864-878]	0	3725.57	HexNAc(4)Hex(5)Fuc(1)NeuAc(1)	0	864	4.32	233.1	22.6	22.6	4.73293e-05	4.84235e-06	0	0	0.195966	0.0358788	0.0283019	0.0313589	High
High	[R].VTPACNTSLPAQR.[W]	1xCarbamidomethyl [C5]; 1xHexNAc(5)Hex(6)Fuc(1)NeuAc(2) [N6]	1	Q9UBG0	Q9UBG0 [64-76]	0	4130.67	HexNAc(5)Hex(6)Fuc(1)NeuAc(2)	0	64	6.59	279.4	62.7	62.7	2.58059e-07	3.97814e-08	0	0	0.000560957	8.82725e-05	0	0	High
High	[R].VTPACNTSLPAQR.[W]	1xCarbamidomethyl [C5]; 1xHexNAc(4)Hex(5)Fuc(1)NeuAc(1) [N6]	1	Q9UBG0	Q9UBG0 [64-76]	0	3474.45	HexNAc(4)Hex(5)Fuc(1)NeuAc(1)	0	64	5.1	234.3	22.6	22.6	8.02437e-06	6.74797e-07	0	0	0.0171579	0.00682594	0.00647249	0.00719424	High
High	[R].WVPVNK.[S]	1xHexNAc(7)Hex(7)Fuc(1)NeuAc(3) [N5]	1	Q8WZ42	Q8WZ42 [19369-19374]	0	4317.69	HexNAc(7)Hex(7)Fuc(1)NeuAc(3)	1	19369	1.31	77.5	1.7	1.7	0.0488482	0.00928074	0.00907029	0.0110193	0.995285	1	0.480246	0.509328	High
High	[R].YETTNK.[T]	1xHexNAc(4)Hex(5)Fuc(1)NeuAc(2) [N5]	2	P13473	P13473 [54-59]	0	3106.19	HexNAc(4)Hex(5)Fuc(1)NeuAc(2)	0	54	4.53	222.6	37.7	37.7	2.97977e-05	2.18051e-06	0	0	0.0609219	0.0151515	0.0140845	0.0157729	High
High	[R].YETTNK.[T]	1xHexNAc(5)Hex(6)Fuc(1)NeuAc(3) [N5]	2	P13473	P13473 [54-59]	0	3762.41	HexNAc(5)Hex(6)Fuc(1)NeuAc(3)	0	54	3.42	181.7	15.4	15.4	0.000383689	3.08247e-05	0	0	0.451867	0.0709534	0.0676533	0.0729412	High
High	[R].YETTNK.[T]	1xHexNAc(6)Hex(7)Fuc(1)NeuAc(4) [N5]	2	P13473	P13473 [54-59]	0	4418.64	HexNAc(6)Hex(7)Fuc(1)NeuAc(4)	1	54	2.82	129.9	0.6	0.6	0.00152529	7.03265e-05	0	0	0.884112	0.328179	0.191837	0.21219	High
High	[R].YETTNK.[T]	1xHexNAc(5)Hex(6)Fuc(1)NeuAc(2) [N5]	1	P13473	P13473 [54-59]	0	3471.32	HexNAc(5)Hex(6)Fuc(1)NeuAc(2)	0	54	2.78	196.9	3.6	3.6	0.00165086	0.000124593	0	0	0.891941	0.468459	0.248658	0.273084	High
High	[R].YFNIDPNATQASGNCGTR.[K]	1xCarbamidomethyl [C15]; 1xHexNAc(4)Hex(5)Fuc(1)NeuAc(1) [N7]	1	Q9UQV4	Q9UQV4 [260-277]	0	4045.61	HexNAc(4)Hex(5)Fuc(1)NeuAc(1)	0	260	7.8	432.3	247.4	171	1.57617e-08	3.36956e-09	0	0	3.42798e-05	7.37121e-06	0	0	High
High	[R].YFNIDPNATQASGNCGTR.[K]	1xCarbamidomethyl [C15]; 1xHexNAc(4)Hex(5)Fuc(1)NeuAc(2) [N7]	1	Q9UQV4	Q9UQV4 [260-277]	0	4336.71	HexNAc(4)Hex(5)Fuc(1)NeuAc(2)	1	260	5.27	176.1	40.6	40.6	5.41004e-06	4.26779e-07	0	0	0.0272906	0.00253586	0	0	High
High	[R].YHNQTLR.[Y]	1xHexNAc(2)Hex(8) [N3]	1	P11717	P11717 [398-404]	0	2634.06	HexNAc(2)Hex(8)	0	398	5.67	306.6	72.3	72.3	2.12022e-06	1.53767e-07	0	0	0.00459054	0.00378788	0.0037037	0.00409836	High
High	[R].YHNQTLR.[Y]	1xHexNAc(2)Hex(9) [N3]	1	P11717	P11717 [398-404]	0	2796.11	HexNAc(2)Hex(9)	0	398	1.15	220.4	19.6	19.6	0.0705055	0.00928074	0.00865801	0.0105263	0.996684	1	0.497685	0.524898	High
High	[R].YHSQTYGNGSK.[C]	1xHexNAc(2)Hex(9) [N8]	1	Q13438	Q13438 [170-180]	0	3106.19	HexNAc(2)Hex(9)	0	170	6.64	338.2	143.2	143.2	2.29205e-07	3.53063e-08	0	0	0.000498266	7.83649e-05	0	0	High
High	[R].YYNQSEAGSHTLQR.[M]	1xHexNAc(4)Hex(5)Fuc(1)NeuAc(1) [N3]	1	P30485	P30485 [108-121]	0	3713.5	HexNAc(4)Hex(5)Fuc(1)NeuAc(1)	0	108	7.8	438.7	216.9	216.9	1.58972e-08	3.57259e-09	0	0	3.45746e-05	7.83076e-06	0	0	High
High	[R].YYNQSEAGSHTLQR.[M]	1xHexNAc(5)Hex(6)Fuc(1)NeuAc(2) [N3]	1	P30485	P30485 [108-121]	0	4369.72	HexNAc(5)Hex(6)Fuc(1)NeuAc(2)	1	108	6.78	240.9	124.2	44.8	1.67703e-07	2.86494e-08	0	0	0.000364616	6.36195e-05	0	0	High
High	[R].YYNQSEAGSHTLQR.[M]	1xHexNAc(4)Hex(5)Fuc(1)NeuAc(2) [N3]	2	P30485	P30485 [108-121]	0	4004.59	HexNAc(4)Hex(5)Fuc(1)NeuAc(2)	-1	108	6.57	525.8	262.6	99	2.708e-07	4.17304e-08	0	0	0.000588636	9.25861e-05	0	0	High
High	[R].YYNQSEAGSHTLQR.[M]	1xHexNAc(5)Hex(6)NeuAc(3) [N3]	1	P30485	P30485 [108-121]	0	4514.76	HexNAc(5)Hex(6)NeuAc(3)	1	108	4.52	160.5	50.2	50.2	2.9975e-05	2.34113e-06	0	0	0.0612624	0.0151515	0.0139665	0.015625	High

## Sheet: Letin-alone
Confidence	Annotated Sequence	Modifications	# PSMs	Master Protein Accessions	Positions in Master Proteins	# Missed Cleavages	Theo. MH+ [Da]	Glycan composition	Off By X	Position in Protein	|Log Prob| A2	Byonic Score A2	Delta Byonic Score A2	Delta Mod Score A2	PEP 2D A2	q-Value 2D A2	FDR 2D A2	Peptide Group FDR 2D A2	PEP 1D A2	q-Value 1D A2	FDR 1D A2	Peptide Group FDR 1D A2	Confidence A2
High	[K].NMSFVNDLTVTQDGR.[K]	1xHexNAc(2)Hex(8) [N1]; 1xOxidation [M2]	1	Q9HDC9	Q9HDC9 [196-210]	0	3415.37	HexNAc(2)Hex(8)	0	196	13.32	759.1	527.3	527.3	4.75529e-14	1.48492e-14	0	0	6.20576e-12	1.93785e-12	0	0	High
High	[R].TNSTFVQALVEHVK.[E]	1xHexNAc(2)Hex(2)Fuc(1) [N2]	1	P07602	P07602 [214-227]	0	2449.16	HexNAc(2)Hex(2)Fuc(1)	0	214	13.29	759.5	518.7	518.7	5.14072e-14	3.05167e-14	0	0	6.70876e-12	3.9825e-12	0	0	High
High	[K].GQTEIQVNCPPAVTENK.[T]	1xHexNAc(2)Hex(7) [N16]; 1xCarbamidomethyl [C9]	2	Q16563	Q16563 [56-72]	0	3425.44	HexNAc(2)Hex(7)	0	56	13.02	756.3	584.2	584.2	9.56872e-14	4.48563e-14	0	0	1.24874e-11	5.85386e-12	0	0	High
High	[K].NMSFVNDLTVTQDGR.[K]	1xHexNAc(2)Hex(6) [N1]; 1xOxidation [M2]	1	Q9HDC9	Q9HDC9 [196-210]	0	3091.27	HexNAc(2)Hex(6)	0	196	12.32	714.7	511.7	511.7	4.75529e-13	1.0588e-13	0	0	6.20576e-11	1.38176e-11	0	0	High
High	[K].VASVININPNTTHSTGSCR.[S]	1xHexNAc(2)Hex(3)Fuc(1) [N10]; 1xCarbamidomethyl [C18]	1	P13473	P13473 [248-266]	0	3066.37	HexNAc(2)Hex(3)Fuc(1)	0	248	11.95	667.4	443	443	1.13356e-12	3.45564e-13	0	0	1.47932e-10	4.50969e-11	0	0	High
High	[K].VASVININPNTTHSTGSCR.[S]	1xHexNAc(2)Hex(6) [N10]; 1xCarbamidomethyl [C18]	2	P13473	P13473 [248-266]	0	3406.47	HexNAc(2)Hex(6)	0	248	11.64	680.1	493.3	493.3	2.28098e-12	4.94898e-13	0	0	2.97673e-10	5.83903e-11	0	0	High
High	[K].GQTEIQVNCPPAVTENK.[T]	1xHexNAc(2)Hex(6) [N16]; 1xCarbamidomethyl [C9]	1	Q16563	Q16563 [56-72]	0	3263.39	HexNAc(2)Hex(6)	0	56	11.32	687.3	509.2	509.2	4.75529e-12	1.05554e-12	0	0	6.20576e-10	1.35894e-10	0	0	High
High	[R].IAPASNVSHTVVLRPLK.[A]	1xHexNAc(2)Hex(8) [N6]	2	P43308	P43308 [83-99]	0	3504.65	HexNAc(2)Hex(8)	0	83	11.23	672.5	604.5	604.5	5.92584e-12	1.9222e-12	0	0	7.73336e-10	2.53136e-10	0	0	High
High	[R].AGPNGTLFVADAYK.[G]	1xHexNAc(2)Hex(4) [N4]	1	Q9HDC9	Q9HDC9 [157-170]	0	2478.09	HexNAc(2)Hex(4)	0	157	11.08	677.2	431.4	431.4	8.30096e-12	2.54418e-12	0	0	1.08329e-09	3.20089e-10	0	0	High
High	[K].VASVININPNTTHSTGSCR.[S]	1xHexNAc(2)Hex(7) [N10]; 1xCarbamidomethyl [C18]	1	P13473	P13473 [248-266]	0	3568.52	HexNAc(2)Hex(7)	0	248	10.95	631.2	452.6	452.6	1.13356e-11	3.38804e-12	0	0	1.47932e-09	4.37458e-10	0	0	High
High	[R].NPCTSEQNCTSPFSYK.[N]	1xHexNAc(2)Hex(6) [N8]; 2xCarbamidomethyl [C3; C9]	1	P05556	P05556 [205-220]	0	3298.27	HexNAc(2)Hex(6)	0	205	10.32	628.9	440.8	440.8	4.75529e-11	8.53668e-12	0	0	6.20576e-09	1.03927e-09	0	0	High
High	[R].MDPPCTNTTAASTYLNNPYVR.[K]	1xHexNAc(2)Hex(7) [N7]; 1xOxidation [M1]; 1xCarbamidomethyl [C5]	1	P10619	P10619 [327-347]	0	3942.6	HexNAc(2)Hex(7)	0	327	10.09	620.3	514.2	514.2	8.06026e-11	1.39673e-11	0	0	1.05188e-08	1.81114e-09	0	0	High
High	[K].ENTSDPSLVIAFGR.[G]	1xHexNAc(2)Hex(3)Fuc(1) [N2]	3	P11279	P11279 [83-96]	0	2544.13	HexNAc(2)Hex(3)Fuc(1)	0	83	9.78	626.2	467.6	467.6	1.67034e-10	2.3773e-11	0	0	2.17983e-08	3.18025e-09	0	0	High
High	[K].VASVININPNTTHSTGSCR.[S]	1xCarbamidomethyl [C18]; 1xHexNAc(5)Hex(6)Fuc(1)NeuAc(2) [N10]	1	P13473	P13473 [248-266]	0	4743.96	HexNAc(5)Hex(6)Fuc(1)NeuAc(2)	0	248	9.74	571.6	431	152.1	1.83041e-10	2.6301e-11	0	0	2.38873e-08	3.53121e-09	0	0	High
High	[K].NLTFEGPLPEK.[I]	1xHexNAc(2)Hex(3)Fuc(1) [N1]	2	Q9HAT2	Q9HAT2 [401-411]	0	2283.03	HexNAc(2)Hex(3)Fuc(1)	0	401	9.67	626.7	442.2	442.2	2.15382e-10	3.44056e-11	0	0	2.81079e-08	4.65233e-09	0	0	High
High	[K].GSLSYLNVTR.[K]	1xHexNAc(2)Hex(3)Fuc(1) [N7]	3	P07339	P07339 [257-266]	0	2147.97	HexNAc(2)Hex(3)Fuc(1)	0	257	9.5	620.1	382	382	3.13785e-10	5.18491e-11	0	0	4.09496e-08	7.05254e-09	0	0	High
High	[K].VASVININPNTTHSTGSCR.[S]	1xCarbamidomethyl [C18]; 1xHexNAc(4)Hex(5)Fuc(1)NeuAc(1) [N10]	2	P13473	P13473 [248-266]	0	4087.73	HexNAc(4)Hex(5)Fuc(1)NeuAc(1)	0	248	9.43	588	421.7	92.1	3.6832e-10	5.62445e-11	0	0	4.80666e-08	7.65569e-09	0	0	High
High	[R].AGPNGTLFVADAYK.[G]	1xHexNAc(2)Hex(3)Fuc(1) [N4]	1	Q9HDC9	Q9HDC9 [157-170]	0	2462.1	HexNAc(2)Hex(3)Fuc(1)	0	157	9.08	582.7	390.3	390.3	8.30094e-10	1.22003e-10	0	0	1.08329e-07	1.66278e-08	0	0	High
High	[R].EASIVGENETYPR.[A]	1xHexNAc(2)Hex(9) [N8]	1	Q9UBV2	Q9UBV2 [601-613]	0	3329.33	HexNAc(2)Hex(9)	0	601	9.08	597.7	373.5	373.5	8.30094e-10	1.13367e-10	0	0	1.08329e-07	1.54522e-08	0	0	High
High	[K].ANTTQPGIVEGGQVLK.[C]	1xHexNAc(2)Hex(6) [N2]	1	P06756	P06756 [73-88]	0	2990.35	HexNAc(2)Hex(6)	0	73	9.02	590.6	424.9	424.9	9.56869e-10	1.75698e-10	0	0	1.24874e-07	2.39151e-08	0	0	High
High	[R].AEPPLNASASDQGEK.[V]	1xHexNAc(2)Hex(5) [N6]	2	Q9Y4L1	Q9Y4L1 [926-940]	0	2730.14	HexNAc(2)Hex(5)	0	926	9.02	567.7	421.7	421.7	9.56869e-10	1.66821e-10	0	0	1.24874e-07	2.27132e-08	0	0	High
High	[K].GSLSYLNVTR.[K]	1xHexNAc(2)Hex(4) [N7]	3	P07339	P07339 [257-266]	0	2163.96	HexNAc(2)Hex(4)	0	257	8.81	568.1	374.9	374.9	1.55939e-09	3.06168e-10	0	0	2.03503e-07	4.1506e-08	0	0	High
High	[K].NMSFVNDLTVTQDGR.[K]	1xHexNAc(2)Hex(7) [N1]; 1xOxidation [M2]	1	Q9HDC9	Q9HDC9 [196-210]	0	3253.32	HexNAc(2)Hex(7)	0	196	8.57	545.8	367.4	367.4	2.70258e-09	3.76862e-10	0	0	3.52693e-07	4.84124e-08	0	0	High
High	[R].NHSIFLADINQER.[G]	1xHexNAc(2)Hex(3)Fuc(1) [N1]	1	P50897	P50897 [197-209]	0	2595.16	HexNAc(2)Hex(3)Fuc(1)	0	197	8.56	593.6	359.1	359.1	2.74826e-09	4.20638e-10	0	0	3.58654e-07	5.44175e-08	0	0	High
High	[K].VASVININPNTTHSTGSCR.[S]	1xCarbamidomethyl [C18]; 1xHexNAc(6)Hex(7)Fuc(1) [N10]	1	P13473	P13473 [248-266]	0	4526.9	HexNAc(6)Hex(7)Fuc(1)	0	248	8.49	533.2	400.5	182.6	3.20218e-09	5.34829e-10	0	0	4.17892e-07	7.00317e-08	0	0	High
High	[K].KGTTTNATSTTTTTASTAVADAQK.[R]	1xHexNAc(2)Rev1 [N6]	1	Q9UHR5	Q9UHR5 [229-252]	1	2734.31	HexNAc(2)	0	229	8.36	512.7	419.6	419.6	4.33975e-09	6.48963e-10	0	0	5.66347e-07	8.15892e-08	0	0	High
High	[K].GSLSYLNVTR.[K]	1xHexNAc(2)Hex(6) [N7]	2	P07339	P07339 [257-266]	0	2488.07	HexNAc(2)Hex(6)	0	257	8.05	589.5	321.8	321.8	8.96024e-09	1.47988e-09	0	0	1.16933e-06	1.84231e-07	0	0	High
High	[R].LAVTNTTMTGTVLK.[M]	1xHexNAc(2)Hex(8) [N5]; 1xOxidation [M8]	1	Q13586	Q13586 [167-180]	0	3168.37	HexNAc(2)Hex(8)	0	167	8.02	577.8	309.2	309.2	9.59773e-09	1.7584e-09	0	0	1.25253e-06	2.23098e-07	0	0	High
High	[K].VASVININPNTTHSTGSCR.[S]	1xCarbamidomethyl [C18]; 1xHexNAc(4)Hex(5)Fuc(1) [N10]	1	P13473	P13473 [248-266]	0	3796.63	HexNAc(4)Hex(5)Fuc(1)	0	248	7.97	504.9	364.7	364.7	1.06016e-08	1.82067e-09	0	0	1.38353e-06	2.31758e-07	0	0	High
High	[K].VASVININPNTTHSTGSCR.[S]	1xHexNAc(2)Hex(3) [N10]; 1xCarbamidomethyl [C18]	1	P13473	P13473 [248-266]	0	2920.31	HexNAc(2)Hex(3)	0	248	7.97	519.6	362.4	362.4	1.06016e-08	1.88208e-09	0	0	1.38353e-06	2.40289e-07	0	0	High
High	[K].CHEGNGTFECGACR.[C]	1xHexNAc(2)Hex(9) [N5]; 3xCarbamidomethyl [C1; C10; C13]	1	P05556	P05556 [477-490]	0	3519.25	HexNAc(2)Hex(9)	0	477	7.94	452.1	398.3	398.3	1.13535e-08	2.06947e-09	0	0	1.48166e-06	2.66279e-07	0	0	High
High	[K].VASVININPNTTHSTGSCR.[S]	1xHexNAc(2)Hex(8) [N10]; 1xCarbamidomethyl [C18]	1	P13473	P13473 [248-266]	0	3730.57	HexNAc(2)Hex(8)	0	248	7.87	465.7	334.6	334.6	1.3384e-08	2.2139e-09	0	0	1.74664e-06	2.86257e-07	0	0	High
High	[K].VASVININPNTTHSTGSCR.[S]	1xCarbamidomethyl [C18]; 1xHexNAc(3)Hex(4)Fuc(1) [N10]	1	P13473	P13473 [248-266]	0	3431.5	HexNAc(3)Hex(4)Fuc(1)	0	248	7.87	488.5	264.3	264.3	1.36111e-08	2.29039e-09	0	0	1.77628e-06	2.96825e-07	0	0	High
High	[K].VASVININPNTTHSTGSCR.[S]	1xCarbamidomethyl [C18]; 1xHexNAc(3)Hex(4)Fuc(1)NeuAc(1) [N10]	1	P13473	P13473 [248-266]	0	3722.6	HexNAc(3)Hex(4)Fuc(1)NeuAc(1)	0	248	7.82	433.7	237.9	237.9	1.52086e-08	2.37651e-09	0	0	1.98475e-06	3.08712e-07	0	0	High
High	[K].GSLSYLNVTR.[K]	1xHexNAc(2)Hex(5) [N7]	2	P07339	P07339 [257-266]	0	2326.02	HexNAc(2)Hex(5)	0	257	7.78	596.2	344.3	344.3	1.67745e-08	2.47186e-09	0	0	2.1891e-06	3.21861e-07	0	0	High
High	[R].AACAVKPQEVQMVNGTITNPINGK.[S]	1xOxidation [M12]; 1xCarbamidomethyl [C3]; 1xHexNAc(6)Hex(7) [N14]	1	P11717	P11717 [2123-2146]	0	4909.14	HexNAc(6)Hex(7)	0	2123	7.63	436.1	343.7	88.2	2.3503e-08	2.90161e-09	0	0	3.06719e-06	3.81016e-07	0	0	High
High	[K].AAIPSALDTNSSK.[S]	1xHexNAc(2)Hex(3) [N10]	2	Q08380	Q08380 [542-554]	0	2166.98	HexNAc(2)Hex(3)	0	542	7.59	514.8	328.5	328.5	2.56799e-08	3.04762e-09	0	0	3.35128e-06	4.01085e-07	0	0	High
High	[K].ANTTQPGIVEGGQVLK.[C]	1xHexNAc(2)Hex(7) [N2]	2	P06756	P06756 [73-88]	0	3152.4	HexNAc(2)Hex(7)	0	73	7.57	479.1	301.3	301.3	2.6839e-08	3.34599e-09	0	0	3.50254e-06	4.42055e-07	0	0	High
High	[R].ALGFENATQALGR.[A]	1xHexNAc(2)Hex(9) [N6]	1	Q08380	Q08380 [64-76]	0	3212.34	HexNAc(2)Hex(9)	0	64	7.57	548	315.6	315.6	2.71067e-08	3.78734e-09	0	0	3.53748e-06	5.02558e-07	0	0	High
High	[R].TNSTFVQALVEHVK.[E]	1xHexNAc(2)Hex(5) [N2]	1	P07602	P07602 [214-227]	0	2789.26	HexNAc(2)Hex(5)	0	214	7.54	498.4	321	321	2.90143e-08	4.09131e-09	0	0	3.78642e-06	5.23881e-07	0	0	High
High	[K].LVGGPVAGGDPNQTIR.[G]	1xHexNAc(2)Hex(8) [N12]	1	O15230	O15230 [84-99]	0	3253.41	HexNAc(2)Hex(8)	0	84	7.51	542.8	319.9	319.9	3.12462e-08	4.57398e-09	0	0	4.07769e-06	5.90672e-07	0	0	High
High	[K].ENGTDTVQEEEESPAEGSK.[D]	1xHexNAc(2)Hex(6) [N2]	1	Q9Y4L1	Q9Y4L1 [595-613]	0	3414.33	HexNAc(2)Hex(6)	0	595	7.4	337.5	281.9	281.9	3.98934e-08	6.66033e-09	0	0	5.20616e-06	8.77888e-07	0	0	High
High	[R].AGPNGTLFVADAYK.[G]	1xHexNAc(2)Hex(5) [N4]	1	Q9HDC9	Q9HDC9 [157-170]	0	2640.14	HexNAc(2)Hex(5)	0	157	7.38	516.8	321	321	4.14647e-08	6.85477e-09	0	0	5.41122e-06	9.04555e-07	0	0	High
High	[K].ANTTQPGIVEGGQVLK.[C]	1xHexNAc(2)Hex(8) [N2]	1	P06756	P06756 [73-88]	0	3314.45	HexNAc(2)Hex(8)	0	73	7.34	448.5	293.9	293.9	4.61307e-08	7.68189e-09	0	0	6.02014e-06	1.01785e-06	0	0	High
High	[R].ALGFENATQALGR.[A]	1xHexNAc(2)Hex(3)Fuc(1) [N6]	2	Q08380	Q08380 [64-76]	0	2386.08	HexNAc(2)Hex(3)Fuc(1)	0	64	7.33	480.5	308	308	4.68484e-08	7.89476e-09	0	0	6.11379e-06	1.04697e-06	0	0	High
High	[K].GSLSYLNVTR.[K]	1xHexNAc(2)Hex(7) [N7]	4	P07339	P07339 [257-266]	0	2650.12	HexNAc(2)Hex(7)	0	257	7.32	564.3	339.1	339.1	4.73741e-08	8.10816e-09	0	0	6.1824e-06	1.07615e-06	0	0	High
High	[K].GSLSYLNVTR.[K]	1xHexNAc(1) [N7]	1	P07339	P07339 [257-266]	0	1312.67	HexNAc(1)	0	257	7.3	581.9	322.2	322.2	5.06359e-08	8.98561e-09	0	0	6.60807e-06	1.19598e-06	0	0	High
High	[K].GLNLTEDTYKPR.[I]	1xHexNAc(2)Hex(3)Fuc(1) [N3]	1	Q08380	Q08380 [396-407]	0	2445.1	HexNAc(2)Hex(3)Fuc(1)	0	396	7.27	538.9	294.2	294.2	5.3765e-08	9.65481e-09	0	0	7.01642e-06	1.28723e-06	0	0	High
High	[R].LENITTGTYTIHAQK.[E]	1xHexNAc(2)Hex(6) [N3]	1	Q5JPE7	Q5JPE7 [367-381]	0	3068.36	HexNAc(2)Hex(6)	0	367	7.25	399.8	180.5	180.5	5.63779e-08	1.0123e-08	0	0	7.3574e-06	1.35101e-06	0	0	High
High	[K].ISNLTIVQAEIK.[D]	1xHexNAc(2)Hex(6) [N3]	2	Q70UQ0	Q70UQ0 [326-337]	0	2707.25	HexNAc(2)Hex(6)	0	326	7.25	543	328.4	328.4	5.64354e-08	1.03605e-08	0	0	7.3649e-06	1.38334e-06	0	0	High
High	[R].IAPASNVSHTVVLR.[P]	1xHexNAc(2)Hex(8) [N6]	1	P43308	P43308 [83-96]	0	3166.41	HexNAc(2)Hex(8)	0	83	7.23	499.3	300.4	300.4	5.83786e-08	1.06055e-08	0	0	7.6185e-06	1.41668e-06	0	0	High
High	[R].VQPFNVTQGK.[Y]	1xHexNAc(2)Hex(2) [N5]	1	P13473	P13473 [352-361]	0	1847.86	HexNAc(2)Hex(2)	0	352	7.23	569.6	347.5	347.5	5.8499e-08	1.08486e-08	0	0	7.6342e-06	1.44975e-06	0	0	High
High	[K].AAIPSALDTNSSK.[S]	1xHexNAc(2)Hex(3)Fuc(1) [N10]	2	Q08380	Q08380 [542-554]	0	2313.03	HexNAc(2)Hex(3)Fuc(1)	0	542	7.21	475.9	259.5	259.5	6.17185e-08	1.13558e-08	0	0	8.05436e-06	1.51871e-06	0	0	High
High	[K].VVANGTGTQGQLK.[V]	1xHexNAc(2)Hex(3)Fuc(1) [N4]	2	P08236	P08236 [269-281]	0	2311.07	HexNAc(2)Hex(3)Fuc(1)	0	269	7.2	503.7	290.5	290.5	6.37826e-08	1.16179e-08	0	0	8.32372e-06	1.55434e-06	0	0	High
High	[R].IAPASNVSHTVVLR.[P]	1xHexNAc(2)Hex(9) [N6]	2	P43308	P43308 [83-96]	0	3328.47	HexNAc(2)Hex(9)	0	83	7.16	449.2	252.4	252.4	6.89611e-08	1.2679e-08	0	0	8.99952e-06	1.69843e-06	0	0	High
High	[R].INTTADEKDPTNPFR.[F]	1xHexNAc(2)Hex(9) [N2]	1	O14672	O14672 [277-291]	1	3583.47	HexNAc(2)Hex(9)	0	277	7.11	555.4	311.3	311.3	7.74053e-08	1.44161e-08	0	0	1.01015e-05	1.93397e-06	0	0	High
High	[R].NPCTSEQNCTSPFSYK.[N]	1xHexNAc(2)Hex(8) [N8]; 1xDeamidated [Q7]; 2xCarbamidomethyl [C3; C9]	1	P05556	P05556 [205-220]	0	3623.36	HexNAc(2)Hex(8)	0	205	7.09	428.7	327.4	131.5	8.12635e-08	1.56386e-08	0	0	1.0605e-05	2.05843e-06	0	0	High
High	[R].VQPFNVTQGK.[Y]	1xHexNAc(2)Hex(3) [N5]	2	P13473	P13473 [352-361]	0	2009.92	HexNAc(2)Hex(3)	0	352	7.08	470.2	283.4	283.4	8.38347e-08	1.68824e-08	0	0	1.09405e-05	2.22821e-06	0	0	High
High	[K].DMSDGFISNLTIQR.[Q]	1xHexNAc(2)Hex(6) [N9]; 1xOxidation [M2]	1	P13674	P13674 [105-118]	0	2991.24	HexNAc(2)Hex(6)	0	105	7.06	497.3	350	350	8.76969e-08	1.78238e-08	0	0	1.14446e-05	2.35653e-06	0	0	High
High	[R].AGPNGTLFVADAYK.[G]	1xHexNAc(2)Hex(6) [N4]	1	Q9HDC9	Q9HDC9 [157-170]	0	2802.2	HexNAc(2)Hex(6)	0	157	7.05	525.6	258.7	258.7	8.81995e-08	1.81408e-08	0	0	1.15101e-05	2.39971e-06	0	0	High
High	[K].SCVAVTSAQPQNMSR.[R]	1xHexNAc(2)Hex(6) [N12]; 1xOxidation [M13]; 1xCarbamidomethyl [C2]	1	O15031	O15031 [517-531]	0	3030.23	HexNAc(2)Hex(6)	0	517	7.03	464.7	275.7	275.7	9.28138e-08	1.91252e-08	0	0	1.21123e-05	2.53369e-06	0	0	High
High	[R].GHTLTLNFTR.[N]	1xHexNAc(2)Hex(7) [N7]	1	P11279	P11279 [97-106]	0	2700.15	HexNAc(2)Hex(7)	0	97	7.01	530.8	330.4	330.4	9.70541e-08	2.01254e-08	0	0	1.26657e-05	2.66968e-06	0	0	High
High	[R].DIYTFDGALNK.[S]	1xHexNAc(2)Hex(7) [N10]	2	Q08722	Q08722 [64-74]	0	2797.14	HexNAc(2)Hex(7)	0	64	7.01	478.3	324.6	324.6	9.75313e-08	2.04634e-08	0	0	1.27279e-05	2.71561e-06	0	0	High
High	[K].VASVININPNTTHSTGSCR.[S]	1xHexNAc(2)Hex(4) [N10]; 1xCarbamidomethyl [C18]	1	P13473	P13473 [248-266]	0	3082.36	HexNAc(2)Hex(4)	0	248	6.99	292.2	195.2	195.2	1.01351e-07	2.08151e-08	0	0	1.32265e-05	2.76339e-06	0	0	High
High	[K].EPGSNVTMSVDAECVPMVR.[D]	1xHexNAc(2)Hex(4) [N5]; 1xOxidation [M17]; 1xCarbamidomethyl [C14]	2	Q08380	Q08380 [188-206]	0	3148.3	HexNAc(2)Hex(4)	0	188	6.99	517.1	362.8	217.8	1.02945e-07	2.15197e-08	0	0	1.34344e-05	2.85906e-06	0	0	High
High	[R].EAGNHTSGAGLVQINK.[S]	1xHexNAc(2)Hex(6) [N4]	1	P20645	P20645 [80-95]	0	2974.29	HexNAc(2)Hex(6)	0	80	6.97	382.4	226.3	226.3	1.07861e-07	2.26019e-08	0	0	1.4076e-05	3.00589e-06	0	0	High
High	[K].GSLSYLNVTR.[K]	1xHexNAc(2)Hex(5)Fuc(1) [N7]	2	P07339	P07339 [257-266]	0	2472.08	HexNAc(2)Hex(5)Fuc(1)	0	257	6.96	495.2	300.3	300.3	1.09653e-07	2.29708e-08	0	0	1.43098e-05	3.05591e-06	0	0	High
High	[R].GYYNQSEAGSHTVQR.[M]	1xHexNAc(4)Hex(5)Fuc(1)NeuAc(1) [N4]	2	P01892	P01892 [107-121]	0	3756.5	HexNAc(4)Hex(5)Fuc(1)NeuAc(1)	0	107	6.95	406.7	146.9	146.9	1.1222e-07	2.33473e-08	0	0	1.46448e-05	3.10696e-06	0	0	High
High	[K].TNITLVCKPGDLESAPVLR.[T]	1xCarbamidomethyl [C7]; 1xHexNAc(6)Hex(3) [N2]	1	P11717	P11717 [580-598]	0	3787.76	HexNAc(6)Hex(3)	0	580	6.94	346.5	189.8	189.8	1.15748e-07	2.48606e-08	0	0	1.51052e-05	3.31195e-06	0	0	High
High	[R].EAGNHTSGAGLVQINK.[S]	1xHexNAc(4)Hex(5)Fuc(1)NeuAc(1) [N4]	1	P20645	P20645 [80-95]	0	3655.55	HexNAc(4)Hex(5)Fuc(1)NeuAc(1)	0	80	6.91	392.4	150.2	150.2	1.2437e-07	2.60222e-08	0	0	1.62304e-05	3.46915e-06	0	0	High
High	[R].ANHSGAVVLLK.[R]	1xHexNAc(2)Hex(6) [N2]	1	P23229	P23229 [322-332]	0	2487.12	HexNAc(2)Hex(6)	0	322	6.9	439.1	202.6	202.6	1.26512e-07	2.64324e-08	0	0	1.65099e-05	3.52465e-06	0	0	High
High	[K].LGIYADVGNK.[T]	1xHexNAc(2)Hex(3)Fuc(1) [N9]	1	P06280	P06280 [131-140]	0	2087.94	HexNAc(2)Hex(3)Fuc(1)	0	131	6.89	465.7	246.7	246.7	1.29527e-07	2.68515e-08	0	0	1.69033e-05	3.58134e-06	0	0	High
High	[K].TCDWLPKPNMSASCK.[E]	1xOxidation [M10]; 1xHexNAc(2)Hex(3) [N9]; 2xCarbamidomethyl [C2; C14]	1	P07602	P07602 [93-107]	0	2703.11	HexNAc(2)Hex(3)	0	93	6.88	293.2	188	188	1.30842e-07	2.72725e-08	0	0	1.70749e-05	3.63827e-06	0	0	High
High	[K].DSLSINATNIK.[H]	1xHexNAc(2)Hex(8) [N6]	2	P00533	P00533 [347-357]	0	2878.21	HexNAc(2)Hex(8)	0	347	6.88	517.6	271.7	271.7	1.32779e-07	2.81161e-08	0	0	1.73278e-05	3.7523e-06	0	0	High
High	[R].NGSSIVDLSPLIHR.[T]	1xHexNAc(2)Hex(6) [N1]	1	P11717	P11717 [1656-1669]	0	2886.3	HexNAc(2)Hex(6)	0	1656	6.86	434.8	243.8	243.8	1.38739e-07	2.98349e-08	0	0	1.81055e-05	3.92814e-06	0	0	High
High	[R].AEPPLNASASDQGEK.[V]	1xHexNAc(2)Hex(3)Fuc(1) [N6]	1	Q9Y4L1	Q9Y4L1 [926-940]	0	2552.09	HexNAc(2)Hex(3)Fuc(1)	0	926	6.86	300.7	212.6	212.6	1.3909e-07	3.0265e-08	0	0	1.81513e-05	3.98667e-06	0	0	High
High	[K].GSLSYLNVTR.[K]	1xHexNAc(2)Hex(8) [N7]	2	P07339	P07339 [257-266]	0	2812.18	HexNAc(2)Hex(8)	0	257	6.8	546.2	296.6	296.6	1.57571e-07	3.35184e-08	0	0	2.05631e-05	4.36649e-06	0	0	High
High	[K].NITIVTGAPR.[H]	1xHexNAc(2)Hex(6) [N1]	2	P26006	P26006 [265-274]	0	2420.08	HexNAc(2)Hex(6)	0	265	6.8	562.3	276	276	1.57571e-07	3.30413e-08	0	0	2.05631e-05	4.30118e-06	0	0	High
High	[K].YQTLNCSVNVNCVNIR.[C]	1xHexNAc(2)Hex(7) [N5]; 2xCarbamidomethyl [C6; C12]	1	P23229	P23229 [962-977]	0	3494.46	HexNAc(2)Hex(7)	0	962	6.8	331.8	235.2	235.2	1.57829e-07	3.39929e-08	0	0	2.05967e-05	4.43141e-06	0	0	High
High	[R].GHTLTLNFTR.[N]	1xHexNAc(2)Hex(6) [N7]	1	P11279	P11279 [97-106]	0	2538.1	HexNAc(2)Hex(6)	0	97	6.8	428.3	228.8	228.8	1.5858e-07	3.44666e-08	0	0	2.06947e-05	4.4962e-06	0	0	High
High	[K].LNYTLSQGHR.[V]	1xHexNAc(2)Hex(6) [N2]	1	P15144	P15144 [127-136]	0	2567.09	HexNAc(2)Hex(6)	0	127	6.78	401.6	176	176	1.66762e-07	3.6408e-08	0	0	2.17625e-05	4.76151e-06	0	0	High
High	[R].VQPFNVTQGK.[Y]	1xHexNAc(2)Hex(5) [N5]	2	P13473	P13473 [352-361]	0	2334.02	HexNAc(2)Hex(5)	0	352	6.78	431	195.3	195.3	1.66762e-07	3.68944e-08	0	0	2.17625e-05	4.82792e-06	0	0	High
High	[R].NSTIEAANLAGLK.[I]	1xHexNAc(2)Hex(8) [N1]	1	P48723	P48723 [184-196]	0	3004.29	HexNAc(2)Hex(8)	0	184	6.77	382.4	246.1	246.1	1.71429e-07	3.78803e-08	0	0	2.23714e-05	4.96246e-06	0	0	High
High	[K].DNATEEEILVYLEK.[T]	1xHexNAc(2)Hex(3)Fuc(1) [N2]	1	P07602	P07602 [79-92]	0	2704.2	HexNAc(2)Hex(3)Fuc(1)	0	79	6.77	380.1	243.6	243.6	1.71429e-07	3.83731e-08	0	0	2.23714e-05	5.02968e-06	0	0	High
High	[R].TNSTFVQALVEHVK.[E]	1xHexNAc(2)Hex(5)Fuc(1) [N2]	1	P07602	P07602 [214-227]	0	2935.32	HexNAc(2)Hex(5)Fuc(1)	0	214	6.76	325.3	153.2	153.2	1.7337e-07	3.88694e-08	0	0	2.26247e-05	5.09735e-06	0	0	High
High	[K].TANDTSTEAYNLLLR.[T]	1xHexNAc(2)Hex(7) [N3]	1	P11047	P11047 [1203-1217]	0	3222.37	HexNAc(2)Hex(7)	0	1203	6.76	369.4	224.7	224.7	1.74138e-07	3.98542e-08	0	0	2.2725e-05	5.23156e-06	0	0	High
High	[K].GSLSYLNVTR.[K]	1xHexNAc(2)Hex(3) [N7]	2	P07339	P07339 [257-266]	0	2001.91	HexNAc(2)Hex(3)	0	257	6.76	369.3	214.1	214.1	1.75747e-07	4.13213e-08	0	0	2.2935e-05	5.43134e-06	0	0	High
High	[R].NATLVNEADK.[L]	1xHexNAc(2)Hex(3)Fuc(1) [N1]	1	P15144	P15144 [818-827]	0	2112.92	HexNAc(2)Hex(3)Fuc(1)	0	818	6.76	379.8	214.2	214.2	1.75747e-07	4.08342e-08	0	0	2.2935e-05	5.36504e-06	0	0	High
High	[R].DAGVVCTNETR.[S]	1xHexNAc(2)Hex(3)Fuc(1) [N8]; 1xCarbamidomethyl [C6]	2	Q08380	Q08380 [118-128]	0	2259.93	HexNAc(2)Hex(3)Fuc(1)	0	118	6.76	425.8	216.1	216.1	1.75756e-07	4.18049e-08	0	0	2.29361e-05	5.49714e-06	0	0	High
High	[R].SDLNPANGSYPFQALR.[Q]	1xHexNAc(2)Hex(3)Fuc(1) [N7]	2	Q8NHP8	Q8NHP8 [509-524]	0	2788.23	HexNAc(2)Hex(3)Fuc(1)	0	509	6.75	430	261.9	261.9	1.78295e-07	4.46725e-08	0	0	2.32675e-05	5.88696e-06	0	0	High
High	[R].AEPPLNASASDQGEK.[V]	1xHexNAc(2)Hex(6) [N6]	4	Q9Y4L1	Q9Y4L1 [926-940]	0	2892.19	HexNAc(2)Hex(6)	0	926	6.75	422.8	242.9	242.9	1.78295e-07	4.37248e-08	0	0	2.32675e-05	5.75822e-06	0	0	High
High	[R].GSPGNGSSHSGAPGPDPTLAR.[G]	1xHexNAc(2)Hex(8) [N5]	1	Q9BRK3	Q9BRK3 [302-322]	0	3621.48	HexNAc(2)Hex(8)	0	302	6.74	249.5	173.7	173.7	1.81947e-07	4.51542e-08	0	0	2.3744e-05	5.95237e-06	0	0	High
High	[K].TAVNCSSDFDACLITK.[A]	2xCarbamidomethyl [C5; C12]; 1xHexNAc(4)Hex(5)Fuc(1)NeuAc(1) [N4]	1	P13987	P13987 [40-55]	0	3861.54	HexNAc(4)Hex(5)Fuc(1)NeuAc(1)	0	40	6.74	385.9	169.9	169.9	1.83122e-07	4.56366e-08	0	0	2.38974e-05	6.01787e-06	0	0	High
High	[R].VQPFNVTQGK.[Y]	1xHexNAc(2)Hex(6) [N5]	2	P13473	P13473 [352-361]	0	2496.08	HexNAc(2)Hex(6)	0	352	6.73	438.7	208.7	208.7	1.84284e-07	4.61197e-08	0	0	2.4049e-05	6.08343e-06	0	0	High
High	[K].SAEGTFFINK.[T]	1xHexNAc(2)Hex(8) [N9]	2	P06865	P06865 [149-158]	0	2816.14	HexNAc(2)Hex(8)	0	149	6.73	471.6	244.7	244.7	1.87154e-07	4.80325e-08	0	0	2.44236e-05	6.34287e-06	0	0	High
High	[R].AACAVKPQEVQMVNGTITNPINGK.[S]	1xOxidation [M12]; 1xCarbamidomethyl [C3]; 1xHexNAc(4)Hex(5)Fuc(1)NeuAc(1) [N14]	2	P11717	P11717 [2123-2146]	0	4616.03	HexNAc(4)Hex(5)Fuc(1)NeuAc(1)	1	2123	6.72	281.1	265.9	120.5	1.92012e-07	4.90098e-08	0	0	2.50575e-05	6.47532e-06	0	0	High
High	[R].ANHSGAVVLLK.[R]	1xHexNAc(2)Hex(8) [N2]	1	P23229	P23229 [322-332]	0	2811.23	HexNAc(2)Hex(8)	0	322	6.71	375.6	224.4	224.4	1.94782e-07	4.95057e-08	0	0	2.54189e-05	6.5425e-06	0	0	High
High	[R].GNVISSHGNPILLNSSIPEDPSIK.[A]	1xHexNAc(2)Hex(7) [N14]	2	P21589	P21589 [298-321]	0	4028.83	HexNAc(2)Hex(7)	1	298	6.7	245.5	161	68	1.99496e-07	5.10092e-08	0	0	2.60342e-05	6.67974e-06	0	0	High
High	[K].NITIVTGAPR.[H]	1xHexNAc(2)Hex(4) [N1]	2	P26006	P26006 [265-274]	0	2095.98	HexNAc(2)Hex(4)	0	265	6.69	378.5	138.6	138.6	2.02641e-07	5.1518e-08	0	0	2.64445e-05	6.74909e-06	0	0	High
High	[K].DSLSINATNIK.[H]	1xHexNAc(2)Hex(7) [N6]	2	P00533	P00533 [347-357]	0	2716.16	HexNAc(2)Hex(7)	0	347	6.69	447	222.6	222.6	2.04242e-07	5.20288e-08	0	0	2.66535e-05	6.81868e-06	0	0	High
High	[R].VFGSQNLTTVK.[L]	1xHexNAc(2)Hex(9) [N6]	2	Q9Y4L1	Q9Y4L1 [510-520]	0	3058.29	HexNAc(2)Hex(9)	0	510	6.69	366.9	171.1	171.1	2.04831e-07	5.25381e-08	0	0	2.67303e-05	6.88806e-06	0	0	High
High	[R].VIYNLTEK.[G]	1xHexNAc(2)Hex(3) [N4]	1	Q969V3	Q969V3 [425-432]	0	1871.86	HexNAc(2)Hex(3)	0	425	6.67	458.5	226.8	226.8	2.13424e-07	5.30726e-08	0	0	2.78517e-05	6.96085e-06	0	0	High
High	[R].NPCTSEQNCTSPFSYK.[N]	1xHexNAc(2)Hex(7) [N8]; 1xDeamidated [Q7]; 2xCarbamidomethyl [C3; C9]	1	P05556	P05556 [205-220]	0	3461.3	HexNAc(2)Hex(7)	0	205	6.67	457.2	341.5	136.5	2.15245e-07	5.36096e-08	0	0	2.80894e-05	7.03396e-06	0	0	High
High	[K].AAIPSALDTNSSK.[S]	1xHexNAc(2)Hex(7) [N10]	2	Q08380	Q08380 [542-554]	0	2815.19	HexNAc(2)Hex(7)	0	542	6.66	340.3	213.6	213.6	2.20368e-07	5.52383e-08	0	0	2.87579e-05	7.25558e-06	0	0	High
High	[K].WGHNITEFQQR.[F]	1xHexNAc(2)Hex(6) [N4]	1	Q96HE7	Q96HE7 [277-287]	0	2794.16	HexNAc(2)Hex(6)	0	277	6.65	369.4	156.7	156.7	2.24586e-07	5.57918e-08	0	0	2.93083e-05	7.33085e-06	0	0	High
High	[K].AAIPSALDTNSSK.[S]	1xHexNAc(2)Hex(8) [N10]	2	Q08380	Q08380 [542-554]	0	2977.24	HexNAc(2)Hex(8)	0	542	6.64	360.4	194.7	194.7	2.31736e-07	5.80115e-08	0	0	3.02414e-05	7.63252e-06	0	0	High
High	[R].VQPFNVTQGK.[Y]	1xHexNAc(2)Hex(7) [N5]	2	P13473	P13473 [352-361]	0	2658.13	HexNAc(2)Hex(7)	0	352	6.59	427.4	203.8	203.8	2.55999e-07	6.10406e-08	0	0	3.34076e-05	8.04381e-06	0	0	High
High	[R].VQPFNVTQGK.[Y]	1xHexNAc(2)Hex(4) [N5]	2	P13473	P13473 [352-361]	0	2171.97	HexNAc(2)Hex(4)	0	352	6.59	422.3	206.3	206.3	2.55999e-07	6.16576e-08	0	0	3.34076e-05	8.12752e-06	0	0	High
High	[R].TNSTFVQALVEHVK.[E]	1xHexNAc(2)Hex(3) [N2]	2	P07602	P07602 [214-227]	0	2465.16	HexNAc(2)Hex(3)	0	214	6.58	264.9	124	124	2.63089e-07	6.35195e-08	0	0	3.43328e-05	8.38003e-06	0	0	High
High	[R].VQPFNVTQGK.[Y]	1xHexNAc(3)Hex(6) [N5]	1	P13473	P13473 [352-361]	0	2699.16	HexNAc(3)Hex(6)	0	352	6.57	404.5	171.8	171.8	2.69204e-07	6.47823e-08	0	0	3.51308e-05	8.55119e-06	0	0	High
High	[R].SSCGKENTSDPSLVIAFGR.[G]	1xHexNAc(2)Hex(3)Fuc(1) [N7]; 1xCarbamidomethyl [C3]	2	P11279	P11279 [78-96]	1	3063.35	HexNAc(2)Hex(3)Fuc(1)	0	78	6.56	390.1	288.9	288.9	2.7414e-07	6.60682e-08	0	0	3.57748e-05	8.7254e-06	0	0	High
High	[K].DMSDGFISNLTIQR.[Q]	1xHexNAc(2)Hex(9) [N9]; 1xOxidation [M2]	1	P13674	P13674 [105-118]	0	3477.4	HexNAc(2)Hex(9)	0	105	6.55	313.1	151	151	2.79867e-07	6.868e-08	0	0	3.65223e-05	9.07904e-06	0	0	High
High	[K].TYNASVLPVR.[V]	1xHexNAc(2)Hex(6) [N3]	1	Q96S52	Q96S52 [368-377]	0	2498.09	HexNAc(2)Hex(6)	0	368	6.55	390.6	213.1	213.1	2.83704e-07	7.06296e-08	0	0	3.7023e-05	9.34278e-06	0	0	High
High	[R].TANHSAPSLENSVQPGK.[R]	1xHexNAc(2)Hex(6) [N3]	1	Q9UJ14	Q9UJ14 [521-537]	0	3115.33	HexNAc(2)Hex(6)	0	521	6.54	284.1	152.4	152.4	2.88569e-07	7.3207e-08	0	0	3.76578e-05	9.69119e-06	0	0	High
High	[R].TNSTFVQALVEHVK.[E]	1xHexNAc(2)Hex(4) [N2]	1	P07602	P07602 [214-227]	0	2627.21	HexNAc(2)Hex(4)	0	214	6.54	345	171.8	171.8	2.88735e-07	7.51257e-08	0	0	3.76795e-05	9.95034e-06	0	0	High
High	[R].TNSTFVQALVEHVK.[E]	1xHexNAc(2)Hex(3)Fuc(1) [N2]	2	P07602	P07602 [214-227]	0	2611.21	HexNAc(2)Hex(3)Fuc(1)	0	214	6.54	340.9	181.3	181.3	2.88735e-07	7.44899e-08	0	0	3.76795e-05	9.86449e-06	0	0	High
High	[K].NITIVTGAPR.[H]	1xHexNAc(2)Hex(5) [N1]	2	P26006	P26006 [265-274]	0	2258.03	HexNAc(2)Hex(5)	0	265	6.53	501.6	205.4	205.4	2.93641e-07	7.57722e-08	0	0	3.83197e-05	1.00376e-05	0	0	High
High	[K].ANTTQPGIVEGGQVLK.[C]	1xHexNAc(3)Hex(6) [N2]	1	P06756	P06756 [73-88]	0	3193.43	HexNAc(3)Hex(6)	0	73	6.53	301.9	166.7	166.7	2.94205e-07	7.64165e-08	0	0	3.83932e-05	1.01246e-05	0	0	High
High	[R].VQPFNVTQGK.[Y]	1xHexNAc(3)Hex(6)NeuAc(1) [N5]	2	P13473	P13473 [352-361]	0	2990.25	HexNAc(3)Hex(6)NeuAc(1)	0	352	6.53	411.5	154.8	154.8	2.95163e-07	7.70599e-08	0	0	3.85183e-05	1.02114e-05	0	0	High
High	[R].VQPFNVTQGK.[Y]	1xHexNAc(4)Hex(5) [N5]	1	P13473	P13473 [352-361]	0	2740.18	HexNAc(4)Hex(5)	0	352	6.53	375	170.9	170.9	2.98337e-07	7.96116e-08	0	0	3.89325e-05	1.05556e-05	0	0	High
High	[R].VQPFNVTQGK.[Y]	1xHexNAc(2)Hex(3)Fuc(1) [N5]	1	P13473	P13473 [352-361]	0	2155.98	HexNAc(2)Hex(3)Fuc(1)	0	352	6.5	409.5	213.5	213.5	3.18961e-07	8.28548e-08	0	0	4.16237e-05	1.09928e-05	0	0	High
High	[K].VVANGTGTQGQLK.[V]	1xHexNAc(2)Hex(6) [N4]	1	P08236	P08236 [269-281]	0	2651.17	HexNAc(2)Hex(6)	0	269	6.5	373.4	183.1	183.1	3.19545e-07	8.35311e-08	0	0	4.17e-05	1.10839e-05	0	0	High
High	[R].NPCTSEQNCTSPFSYK.[N]	1xDeamidated [Q7]; 2xCarbamidomethyl [C3; C9]; 1xHexNAc(2)Hex(5) [N8]	1	P05556	P05556 [205-220]	0	3137.2	HexNAc(2)Hex(5)	0	205	6.49	407	327	110.7	3.21353e-07	8.48802e-08	0	0	4.1936e-05	1.12656e-05	0	0	High
High	[R].NNTIVNELVR.[V]	1xHexNAc(2)Hex(3)Fuc(1) [N1]	3	P10253	P10253 [882-891]	0	2210.02	HexNAc(2)Hex(3)Fuc(1)	0	882	6.47	411.5	188.8	188.8	3.3541e-07	8.69705e-08	0	0	4.37703e-05	1.15471e-05	0	0	High
High	[K].TVTTSGTTNNTVTPTSQPVR.[K]	1xHexNAc(2)Hex(8) [N9]	1	Q04900	Q04900 [138-157]	0	3764.62	HexNAc(2)Hex(8)	0	138	6.47	292.6	224	224	3.40344e-07	8.76822e-08	0	0	4.44141e-05	1.16429e-05	0	0	High
High	[R].LLNINPNK.[T]	1xHexNAc(2)Hex(4) [N7]	1	P11279	P11279 [255-262]	0	1979.92	HexNAc(2)Hex(4)	0	255	6.46	385	192.7	192.7	3.45495e-07	8.84044e-08	0	0	4.50864e-05	1.17402e-05	0	0	High
High	[R].VIYNLTEK.[G]	1xHexNAc(2)Hex(5) [N4]	1	Q969V3	Q969V3 [425-432]	0	2195.97	HexNAc(2)Hex(5)	0	425	6.46	397.1	188.1	188.1	3.45495e-07	8.91225e-08	0	0	4.50864e-05	1.18368e-05	0	0	High
High	[K].NMSFVNDLTVTQDGR.[K]	1xDeamidated [N6]; 1xOxidation [M2]; 1xHexNAc(2)Hex(5) [N1]	1	Q9HDC9	Q9HDC9 [196-210]	0	2930.2	HexNAc(2)Hex(5)	0	196	6.45	445.6	281.2	173.4	3.5576e-07	9.05892e-08	0	0	4.64258e-05	1.20342e-05	0	0	High
High	[R].MDPPCTNTTAASTYLNNPYVR.[K]	1xOxidation [M1]; 1xHexNAc(2)Hex(3) [N7]; 1xCarbamidomethyl [C5]	1	P10619	P10619 [327-347]	0	3294.39	HexNAc(2)Hex(3)	0	327	6.45	271.7	190.1	190.1	3.57896e-07	9.27938e-08	0	0	4.67045e-05	1.23307e-05	0	0	High
High	[R].VFGSQNLTTVK.[L]	1xHexNAc(2)Hex(6) [N6]	1	Q9Y4L1	Q9Y4L1 [510-520]	0	2572.13	HexNAc(2)Hex(6)	0	510	6.44	385.4	143.9	143.9	3.62514e-07	9.35348e-08	0	0	4.73072e-05	1.24304e-05	0	0	High
High	[R].VFGSQNLTTVK.[L]	1xHexNAc(2)Hex(8) [N6]	2	Q9Y4L1	Q9Y4L1 [510-520]	0	2896.23	HexNAc(2)Hex(8)	0	510	6.43	478.7	203.2	203.2	3.67649e-07	9.57665e-08	0	0	4.79773e-05	1.27304e-05	0	0	High
High	[R].GVFITNETGQPLIGK.[V]	1xHexNAc(2)Hex(6) [N6]; 1xDeamidated [Q10]	2	P10253	P10253 [465-479]	0	2953.32	HexNAc(2)Hex(6)	0	465	6.43	256.2	140.4	140.4	3.70532e-07	9.72523e-08	0	0	4.83535e-05	1.29301e-05	0	0	High
High	[R].FINYNQTVSR.[M]	1xHexNAc(2)Hex(9) [N5]	1	Q8N766	Q8N766 [909-918]	0	3106.26	HexNAc(2)Hex(9)	0	909	6.43	463.3	201.5	201.5	3.70634e-07	9.79912e-08	0	0	4.83668e-05	1.30293e-05	0	0	High
High	[R].VFGSQNLTTVK.[L]	1xHexNAc(2)Hex(5) [N6]	2	Q9Y4L1	Q9Y4L1 [510-520]	0	2410.08	HexNAc(2)Hex(5)	0	510	6.43	411.3	175.4	175.4	3.7172e-07	1.0019e-07	0	0	4.85085e-05	1.33246e-05	0	0	High
High	[R].LLNINPNK.[T]	1xHexNAc(2)Hex(5) [N7]	2	P11279	P11279 [255-262]	0	2141.97	HexNAc(2)Hex(5)	0	255	6.43	366.7	238.4	238.4	3.7279e-07	1.01643e-07	0	0	4.86481e-05	1.35197e-05	0	0	High
High	[K].HTNMNLTQLK.[V]	1xHexNAc(2)Hex(7) [N5]; 1xOxidation [M4]	1	Q15165	Q15165 [250-259]	0	2756.14	HexNAc(2)Hex(7)	0	250	6.42	350	107.2	107.2	3.7846e-07	1.0238e-07	0	0	4.9388e-05	1.36185e-05	0	0	High
High	[K].DTCTQECSYFNITK.[V]	1xHexNAc(2)Hex(6) [N11]; 2xCarbamidomethyl [C3; C7]	1	P05556	P05556 [659-672]	0	3145.21	HexNAc(2)Hex(6)	0	659	6.39	284.4	142.1	142.1	4.04103e-07	1.0469e-07	0	0	5.27342e-05	1.39286e-05	0	0	High
High	[K].TNITLVCKPGDLESAPVLR.[T]	1xHexNAc(2)Hex(8) [N2]; 1xCarbamidomethyl [C7]	1	P11717	P11717 [580-598]	0	3785.7	HexNAc(2)Hex(8)	0	580	6.39	364.2	194.8	194.8	4.08152e-07	1.06281e-07	0	0	5.32626e-05	1.41422e-05	0	0	High
High	[R].VFGSQNLTTVK.[L]	1xHexNAc(2)Hex(7) [N6]	2	Q9Y4L1	Q9Y4L1 [510-520]	0	2734.18	HexNAc(2)Hex(7)	0	510	6.39	371.1	180.9	180.9	4.11935e-07	1.07081e-07	0	0	5.37563e-05	1.42495e-05	0	0	High
High	[K].AEFNITLIHPK.[D]	1xHexNAc(2)Hex(7) [N4]	1	P15144	P15144 [231-241]	0	2823.24	HexNAc(2)Hex(7)	0	231	6.39	372.4	197.9	197.9	4.11935e-07	1.07877e-07	0	0	5.37563e-05	1.43563e-05	0	0	High
High	[K].LNYTLSQGHR.[V]	1xHexNAc(2)Hex(8) [N2]	1	P15144	P15144 [127-136]	0	2891.19	HexNAc(2)Hex(8)	0	127	6.38	327.6	117.4	117.4	4.16849e-07	1.10264e-07	0	0	5.43974e-05	1.46763e-05	0	0	High
High	[K].HTNMNLTQLK.[V]	1xHexNAc(2)Hex(8) [N5]	1	Q15165	Q15165 [250-259]	0	2902.2	HexNAc(2)Hex(8)	0	250	6.38	309.6	117.6	117.6	4.16849e-07	1.11056e-07	0	0	5.43974e-05	1.47825e-05	0	0	High
High	[R].VQPFNVTQGK.[Y]	1xHexNAc(4)Hex(5)NeuAc(1) [N5]	2	P13473	P13473 [352-361]	0	3031.28	HexNAc(4)Hex(5)NeuAc(1)	0	352	6.38	387.8	104.1	104.1	4.18834e-07	1.11849e-07	0	0	5.46564e-05	1.48889e-05	0	0	High
High	[R].ANHSGAVVLLK.[R]	1xHexNAc(2)Hex(7) [N2]	1	P23229	P23229 [322-332]	0	2649.18	HexNAc(2)Hex(7)	0	322	6.38	342.5	108.6	108.6	4.19425e-07	1.1264e-07	0	0	5.47336e-05	1.49948e-05	0	0	High
High	[R].LNNITIIGPLDMK.[Q]	1xHexNAc(2)Hex(6) [N3]; 1xOxidation [M12]	2	Q9NUM4	Q9NUM4 [181-193]	0	2836.28	HexNAc(2)Hex(6)	0	181	6.37	233.7	127.2	127.2	4.24637e-07	1.1344e-07	0	0	5.54137e-05	1.5102e-05	0	0	High
High	[K].TAVNCSSDFDACLITK.[A]	2xCarbamidomethyl [C5; C12]; 1xHexNAc(4)Hex(5)Fuc(1) [N4]	1	P13987	P13987 [40-55]	0	3570.45	HexNAc(4)Hex(5)Fuc(1)	0	40	6.37	288.9	171.4	171.4	4.24798e-07	1.14236e-07	0	0	5.54347e-05	1.52087e-05	0	0	High
High	[R].TILVDNNTWNNTHISR.[V]	1xHexNAc(6)Hex(4) [N10]	1	P46977	P46977 [539-554]	0	3764.64	HexNAc(6)Hex(4)	0	539	6.37	263.6	156.2	52.8	4.3009e-07	1.15042e-07	0	0	5.61253e-05	1.53167e-05	0	0	High
High	[K].TCDWLPKPNMSASCK.[E]	1xHexNAc(2)Hex(3)Fuc(1) [N9]; 1xOxidation [M10]; 2xCarbamidomethyl [C2; C14]	2	P07602	P07602 [93-107]	0	2849.17	HexNAc(2)Hex(3)Fuc(1)	0	93	6.35	427.2	291.5	146.5	4.49343e-07	1.16703e-07	0	0	5.86376e-05	1.55392e-05	0	0	High
High	[K].NVSCLWCNTNK.[A]	1xHexNAc(2)Hex(7) [N1]; 2xCarbamidomethyl [C4; C7]	1	P53801	P53801 [54-64]	0	2936.14	HexNAc(2)Hex(7)	0	54	6.34	344.2	200.2	200.2	4.58541e-07	1.19271e-07	0	0	5.98379e-05	1.58833e-05	0	0	High
High	[R].TVLENSTSYEEAK.[N]	1xHexNAc(2)Hex(8) [N5]	1	Q13510	Q13510 [255-267]	0	3173.28	HexNAc(2)Hex(8)	0	255	6.33	348.4	199.8	199.8	4.66011e-07	1.20143e-07	0	0	6.08126e-05	1.6e-05	0	0	High
High	[R].NNVITLNITGK.[A]	1xHexNAc(2)Hex(3)Fuc(1) [N7]	1	P16278	P16278 [458-468]	0	2225.05	HexNAc(2)Hex(3)Fuc(1)	0	458	6.32	270	185.8	185.8	4.7512e-07	1.21032e-07	0	0	6.20012e-05	1.61192e-05	0	0	High
High	[R].NGSSIVDLSPLIHR.[T]	1xHexNAc(2)Hex(5) [N1]	1	P11717	P11717 [1656-1669]	0	2724.25	HexNAc(2)Hex(5)	0	1656	6.3	296.8	156.7	156.7	5.03441e-07	1.29173e-07	0	0	6.56969e-05	1.72092e-05	0	0	High
High	[R].LENITTGTYTIHAQK.[E]	1xHexNAc(2)Hex(7) [N3]	2	Q5JPE7	Q5JPE7 [367-381]	0	3230.41	HexNAc(2)Hex(7)	0	367	6.28	441.2	254.1	254.1	5.22046e-07	1.34715e-07	0	0	6.81246e-05	1.79505e-05	0	0	High
High	[R].SAEFFNYTVR.[T]	1xHexNAc(2)Hex(6) [N6]	2	O60568	O60568 [58-67]	0	2612.07	HexNAc(2)Hex(6)	0	58	6.28	325.7	149.3	149.3	5.25402e-07	1.35657e-07	0	0	6.85624e-05	1.80764e-05	0	0	High
High	[R].LKPLFNK.[S]	1xHexNAc(2)Hex(8) [N6]	2	P20645	P20645 [52-58]	0	2562.12	HexNAc(2)Hex(8)	0	52	6.28	313.4	203.4	203.4	5.27727e-07	1.36599e-07	0	0	6.88658e-05	1.82025e-05	0	0	High
High	[R].LLNINPNK.[T]	1xHexNAc(3)Hex(5)Fuc(1) [N7]	2	P11279	P11279 [255-262]	0	2491.11	HexNAc(3)Hex(5)Fuc(1)	0	255	6.28	376.2	201.7	201.7	5.30238e-07	1.3848e-07	0	0	6.91935e-05	1.8454e-05	0	0	High
High	[K].CNMINGTDGDSFHPLITK.[D]	1xHexNAc(2)Hex(8) [N5]; 1xDeamidated [N2]; 1xOxidation [M3]; 1xCarbamidomethyl [C1]	1	Q14108	Q14108 [245-262]	0	3739.49	HexNAc(2)Hex(8)	0	245	6.27	243.9	174.8	174.8	5.32661e-07	1.39421e-07	0	0	6.95097e-05	1.85797e-05	0	0	High
High	[R].VQPFNVTQGK.[Y]	1xHexNAc(2)Hex(8) [N5]	2	P13473	P13473 [352-361]	0	2820.18	HexNAc(2)Hex(8)	0	352	6.27	418.1	192.9	192.9	5.41301e-07	1.40378e-07	0	0	7.06372e-05	1.87076e-05	0	0	High
High	[R].NSSDETFLK.[D]	1xHexNAc(2)Hex(3)Fuc(1) [N1]	1	Q14956	Q14956 [249-257]	0	2078.86	HexNAc(2)Hex(3)Fuc(1)	0	249	6.27	338.9	185.1	185.1	5.42039e-07	1.41332e-07	0	0	7.07334e-05	1.88351e-05	0	0	High
High	[K].LENLSSSEMGYTATLTR.[T]	1xHexNAc(2)Hex(6) [N3]; 1xOxidation [M9]	1	P10253	P10253 [138-154]	0	3267.37	HexNAc(2)Hex(6)	0	138	6.26	484.7	299.6	299.6	5.455e-07	1.4324e-07	0	0	7.11851e-05	1.90902e-05	0	0	High
High	[R].NPCTSEQNCTSPFSYK.[N]	1xHexNAc(2)Hex(9) [N8]; 1xDeamidated [Q7]; 2xCarbamidomethyl [C3; C9]	1	P05556	P05556 [205-220]	0	3785.41	HexNAc(2)Hex(9)	0	205	6.26	368.3	290.7	77.2	5.47555e-07	1.44194e-07	0	0	7.14532e-05	1.92176e-05	0	0	High
High	[R].LLNINPNK.[T]	1xHexNAc(3)Hex(6) [N7]	2	P11279	P11279 [255-262]	0	2507.1	HexNAc(3)Hex(6)	0	255	6.26	412.6	155.7	155.7	5.51639e-07	1.45153e-07	0	0	7.19861e-05	1.93456e-05	0	0	High
High	[R].ALAYGEKNLTFEGPLPEK.[I]	1xHexNAc(2)Hex(3)Fuc(1) [N8]	1	Q9HAT2	Q9HAT2 [394-411]	1	3015.41	HexNAc(2)Hex(3)Fuc(1)	0	394	6.26	364	248.7	248.7	5.5268e-07	1.46109e-07	0	0	7.21219e-05	1.94734e-05	0	0	High
High	[K].TLSPTGNISSAPK.[D]	1xHexNAc(2)Hex(8) [N7]	1	O94901	O94901 [726-738]	0	2975.26	HexNAc(2)Hex(8)	0	726	6.25	310.1	152.5	152.5	5.62726e-07	1.47085e-07	0	0	7.34329e-05	1.96038e-05	0	0	High
High	[K].ENTSDPSLVIAFGR.[G]	1xHexNAc(2)Hex(8) [N2]	1	P11279	P11279 [83-96]	0	3208.34	HexNAc(2)Hex(8)	0	83	6.24	265.9	208	208	5.78336e-07	1.49077e-07	0	0	7.54697e-05	1.98699e-05	0	0	High
High	[K].NITIVTGAPR.[H]	1xHexNAc(4)Hex(5)NeuAc(1) [N1]	1	P26006	P26006 [265-274]	0	2955.28	HexNAc(4)Hex(5)NeuAc(1)	0	265	6.22	391.8	177.2	177.2	5.99834e-07	1.51169e-07	0	0	7.82749e-05	2.01493e-05	0	0	High
High	[R].VQPFNVTQGK.[Y]	1xHexNAc(4)Hex(5)Fuc(1) [N5]	2	P13473	P13473 [352-361]	0	2886.24	HexNAc(4)Hex(5)Fuc(1)	0	352	6.22	382.1	170.4	170.4	5.99834e-07	1.50125e-07	0	0	7.82749e-05	2.00099e-05	0	0	High
High	[R].VFPQVNVTK.[M]	1xHexNAc(2)Hex(3)Fuc(1) [N6]	1	P54802	P54802 [256-264]	0	2069.96	HexNAc(2)Hex(3)Fuc(1)	0	256	6.22	278.3	109.3	109.3	6.01794e-07	1.52212e-07	0	0	7.85307e-05	2.02887e-05	0	0	High
High	[R].LLNINPNK.[T]	1xHexNAc(2)Hex(6) [N7]	2	P11279	P11279 [255-262]	0	2304.02	HexNAc(2)Hex(6)	0	255	6.22	322.2	164	164	6.08393e-07	1.55336e-07	0	0	7.93917e-05	2.07058e-05	0	0	High
High	[R].LLNINPNK.[T]	1xHexNAc(3)Hex(4)Fuc(1) [N7]	2	P11279	P11279 [255-262]	0	2329.05	HexNAc(3)Hex(4)Fuc(1)	0	255	6.22	303.9	156.2	156.2	6.08393e-07	1.56375e-07	0	0	7.93917e-05	2.08445e-05	0	0	High
High	[R].DLGPTLANSTHHNVR.[L]	1xHexNAc(2)Hex(3)Fuc(1) [N8]	2	P04062	P04062 [302-316]	0	2670.2	HexNAc(2)Hex(3)Fuc(1)	0	302	6.19	423.8	270.7	270.7	6.39561e-07	1.61635e-07	0	0	8.34587e-05	2.15467e-05	0	0	High
High	[R].ELAVPDGYTNR.[T]	1xHexNAc(2)Hex(9) [N10]	1	P26006	P26006 [77-87]	0	3099.24	HexNAc(2)Hex(9)	0	77	6.19	407.5	264.3	264.3	6.47218e-07	1.62733e-07	0	0	8.44579e-05	2.16933e-05	0	0	High
High	[K].NITIVTGAPR.[H]	1xHexNAc(2)Hex(7) [N1]	2	P26006	P26006 [265-274]	0	2582.13	HexNAc(2)Hex(7)	0	265	6.18	311.2	139.2	139.2	6.54505e-07	1.63843e-07	0	0	8.54087e-05	2.18415e-05	0	0	High
High	[K].MNFTGGDTCHK.[V]	1xHexNAc(2)Hex(7) [N2]; 1xOxidation [M1]; 1xCarbamidomethyl [C9]	1	P11717	P11717 [1311-1321]	0	2824.04	HexNAc(2)Hex(7)	0	1311	6.18	342.5	159.4	159.4	6.58547e-07	1.67158e-07	0	0	8.59361e-05	2.22838e-05	0	0	High
High	[K].AEFNITLIHPK.[D]	1xHexNAc(2)Hex(6) [N4]	2	P15144	P15144 [231-241]	0	2661.19	HexNAc(2)Hex(6)	0	231	6.18	273.4	107.6	107.6	6.66889e-07	1.69389e-07	0	0	8.70246e-05	2.25815e-05	0	0	High
High	[R].VFGSQNLTTVK.[L]	1xHexNAc(2)Hex(4) [N6]	1	Q9Y4L1	Q9Y4L1 [510-520]	0	2248.02	HexNAc(2)Hex(4)	0	510	6.18	294.7	128	128	6.66889e-07	1.68276e-07	0	0	8.70246e-05	2.2433e-05	0	0	High
High	[R].VQPFNVTQGK.[Y]	1xHexNAc(3)Hex(5) [N5]	2	P13473	P13473 [352-361]	0	2537.1	HexNAc(3)Hex(5)	0	352	6.17	324.5	123.5	123.5	6.7264e-07	1.7051e-07	0	0	8.7775e-05	2.2731e-05	0	0	High
High	[R].ELAVPDGYTNR.[T]	1xHexNAc(2)Hex(5) [N10]	1	P26006	P26006 [77-87]	0	2451.03	HexNAc(2)Hex(5)	0	77	6.16	260.4	164.6	164.6	6.89845e-07	1.71664e-07	0	0	9.002e-05	2.2885e-05	0	0	High
High	[K].DSLSINATNIK.[H]	1xHexNAc(2)Hex(6) [N6]	2	P00533	P00533 [347-357]	0	2554.1	HexNAc(2)Hex(6)	0	347	6.14	318.7	143.6	143.6	7.2529e-07	1.75245e-07	0	0	9.4645e-05	2.33628e-05	0	0	High
High	[K].NNHTASILDR.[M]	1xHexNAc(2)Hex(8) [N2]	1	P08962	P08962 [129-138]	0	2843.16	HexNAc(2)Hex(8)	0	129	6.1	351.9	95.6	95.6	7.86659e-07	1.85437e-07	0	0	0.000102652	2.47226e-05	0	0	High
High	[K].AAIPSALDTNSSK.[S]	1xHexNAc(3)Hex(4)Fuc(1) [N10]	1	Q08380	Q08380 [542-554]	0	2678.17	HexNAc(3)Hex(4)Fuc(1)	0	542	6.09	288.9	144.4	144.4	8.12252e-07	1.89406e-07	0	0	0.000105992	2.52519e-05	0	0	High
High	[R].LLNINPNK.[T]	1xHexNAc(3)Hex(5) [N7]	2	P11279	P11279 [255-262]	0	2345.05	HexNAc(3)Hex(5)	0	255	6.09	355.9	195.2	195.2	8.12894e-07	1.90747e-07	0	0	0.000106076	2.54307e-05	0	0	High
High	[R].DVNCSVMGPQEK.[K]	1xHexNAc(2)Hex(6) [N3]; 1xOxidation [M7]; 1xCarbamidomethyl [C4]	1	P53634	P53634 [51-62]	0	2758.07	HexNAc(2)Hex(6)	0	51	6.08	295.8	141.4	141.4	8.40407e-07	1.98856e-07	0	0	0.000109666	2.63355e-05	0	0	High
High	[K].MNFTGGDTCHK.[V]	1xHexNAc(2)Hex(8) [N2]; 1xCarbamidomethyl [C9]	2	P11717	P11717 [1311-1321]	0	2970.1	HexNAc(2)Hex(8)	0	1311	6.07	353.6	113.4	113.4	8.43013e-07	2.01577e-07	0	0	0.000110006	2.66998e-05	0	0	High
High	[K].AAIPSALDTNSSK.[S]	1xHexNAc(3)Hex(4)Fuc(1)NeuAc(1) [N10]	1	Q08380	Q08380 [542-554]	0	2969.26	HexNAc(3)Hex(4)Fuc(1)NeuAc(1)	0	542	6.07	254.9	105.2	105.2	8.53476e-07	2.08363e-07	0	0	0.000111371	2.74282e-05	0	0	High
High	[K].ENTSDPSLVIAFGR.[G]	1xHexNAc(2)Hex(6) [N2]	1	P11279	P11279 [83-96]	0	2884.24	HexNAc(2)Hex(6)	0	83	6.07	234.8	118.5	118.5	8.53476e-07	2.0971e-07	0	0	0.000111371	2.76091e-05	0	0	High
High	[K].LNYTLSQGHR.[V]	1xHexNAc(2)Hex(7) [N2]	1	P15144	P15144 [127-136]	0	2729.14	HexNAc(2)Hex(7)	0	127	6.06	321.1	67.9	67.9	8.66355e-07	2.12427e-07	0	0	0.000113051	2.7974e-05	0	0	High
High	[R].ALGFENATQALGR.[A]	1xHexNAc(2)Hex(8) [N6]	1	Q08380	Q08380 [64-76]	0	3050.28	HexNAc(2)Hex(8)	0	64	6.05	247.4	90.6	90.6	8.82521e-07	2.13817e-07	0	0	0.000115161	2.81607e-05	0	0	High
High	[R].LVQLFPNDTSLK.[N]	1xHexNAc(2)Hex(5) [N7]	2	Q12797	Q12797 [446-457]	0	2591.19	HexNAc(2)Hex(5)	0	446	6.04	358.7	232.5	232.5	9.21536e-07	2.20964e-07	0	0	0.000120251	2.893e-05	0	0	High
High	[R].LKPLFNK.[S]	1xHexNAc(2)Hex(6) [N6]	1	P20645	P20645 [52-58]	0	2238.02	HexNAc(2)Hex(6)	0	52	6.03	265.9	127.2	127.2	9.22679e-07	2.22402e-07	0	0	0.0001204	2.91238e-05	0	0	High
High	[K].NITIVTGAPR.[H]	1xHexNAc(2)Hex(9) [N1]	1	P26006	P26006 [265-274]	0	2906.24	HexNAc(2)Hex(9)	0	265	6.02	338.9	146.3	146.3	9.58642e-07	2.32565e-07	0	0	0.000125093	3.04927e-05	0	0	High
High	[K].NITIVTGAPR.[H]	1xHexNAc(2)Hex(8) [N1]	2	P26006	P26006 [265-274]	0	2744.19	HexNAc(2)Hex(8)	0	265	6.02	356	156.1	156.1	9.58642e-07	2.34029e-07	0	0	0.000125093	3.06898e-05	0	0	High
High	[R].MSVINFECNK.[T]	1xOxidation [M1]; 1xCarbamidomethyl [C8]; 1xHexNAc(3)Hex(4)Fuc(1)NeuAc(1) [N9]	1	P11717	P11717 [427-436]	0	2952.16	HexNAc(3)Hex(4)Fuc(1)NeuAc(1)	0	427	6.01	272.7	124.9	124.9	9.70776e-07	2.39886e-07	0	0	0.000126676	3.14781e-05	0	0	High
High	[R].FINYNQTVSR.[M]	1xHexNAc(2)Hex(8) [N5]	1	Q8N766	Q8N766 [909-918]	0	2944.21	HexNAc(2)Hex(8)	0	909	6.01	295.5	105.9	105.9	9.70776e-07	2.38421e-07	0	0	0.000126676	3.1281e-05	0	0	High
High	[R].LLNINPNK.[T]	1xHexNAc(2)Hex(8) [N7]	2	P11279	P11279 [255-262]	0	2628.13	HexNAc(2)Hex(8)	0	255	5.97	325.5	231.3	231.3	1.06038e-06	2.55288e-07	0	0	0.000138367	3.35494e-05	0	0	High
High	[R].LLNINPNK.[T]	1xHexNAc(2)Hex(7) [N7]	2	P11279	P11279 [255-262]	0	2466.08	HexNAc(2)Hex(7)	0	255	5.95	365.4	135.8	135.8	1.10986e-06	2.61835e-07	0	0	0.000144823	3.44293e-05	0	0	High
High	[R].VIYNLTEK.[G]	1xHexNAc(3)Hex(3) [N4]	1	Q969V3	Q969V3 [425-432]	0	2074.94	HexNAc(3)Hex(3)	0	425	5.95	270.2	125.1	125.1	1.1239e-06	2.65176e-07	0	0	0.000146655	3.48782e-05	0	0	High
High	[R].NISQVLEK.[K]	1xHexNAc(2)Hex(6) [N1]	1	O14672	O14672 [439-446]	0	2309	HexNAc(2)Hex(6)	0	439	5.95	280.6	126.2	126.2	1.1239e-06	2.63509e-07	0	0	0.000146655	3.46542e-05	0	0	High
High	[K].KDTCTQECSYFNITK.[V]	2xCarbamidomethyl [C4; C8]; 1xHexNAc(4)Hex(5)Fuc(1)NeuAc(1) [N12]	1	P05556	P05556 [658-672]	1	3954.57	HexNAc(4)Hex(5)Fuc(1)NeuAc(1)	0	658	5.94	337.6	145.2	145.2	1.16032e-06	2.71991e-07	0	0	0.000151407	3.57935e-05	0	0	High
High	[R].VQPFNVTQGK.[Y]	1xHexNAc(3)Hex(4) [N5]	1	P13473	P13473 [352-361]	0	2375.05	HexNAc(3)Hex(4)	0	352	5.92	285.5	111.6	111.6	1.20896e-06	2.82379e-07	0	0	0.000157753	3.71878e-05	0	0	High
High	[R].EADNHTAFIR.[I]	1xHexNAc(2)Hex(6) [N4]	1	Q92545	Q92545 [287-296]	0	2552.04	HexNAc(2)Hex(6)	0	287	5.9	279.4	84.6	84.6	1.25006e-06	2.85966e-07	0	0	0.000163115	3.76693e-05	0	0	High
High	[R].LLNINPNK.[T]	1xHexNAc(5)Hex(6)Fuc(1) [N7]	2	P11279	P11279 [255-262]	0	3059.32	HexNAc(5)Hex(6)Fuc(1)	0	255	5.9	301	129.6	129.6	1.25601e-06	2.878e-07	0	0	0.000163891	3.79153e-05	0	0	High
High	[K].GELNTSIFSSR.[P]	1xHexNAc(2)Hex(6) [N4]	2	Q9UHG3	Q9UHG3 [350-360]	0	2589.08	HexNAc(2)Hex(6)	0	350	5.87	293.6	132.4	132.4	1.33949e-06	2.99254e-07	0	0	0.000174783	3.94517e-05	0	0	High
High	[K].SAEGTFFINK.[T]	1xHexNAc(2)Hex(9) [N9]	1	P06865	P06865 [149-158]	0	2978.19	HexNAc(2)Hex(9)	0	149	5.87	330.4	124.2	124.2	1.35102e-06	3.01216e-07	0	0	0.000176287	3.97149e-05	0	0	High
High	[R].VIYNLTEK.[G]	1xHexNAc(2)Hex(6) [N4]	1	Q969V3	Q969V3 [425-432]	0	2358.02	HexNAc(2)Hex(6)	0	425	5.84	235.2	134.6	134.6	1.44759e-06	3.13399e-07	0	0	0.000188886	4.13482e-05	0	0	High
High	[K].DTCTQECSYFNITK.[V]	2xCarbamidomethyl [C3; C7]; 1xHexNAc(6)Hex(4) [N11]	1	P05556	P05556 [659-672]	0	3633.42	HexNAc(6)Hex(4)	0	659	5.83	276.3	135	135	1.47335e-06	3.21812e-07	0	0	0.000192246	4.24757e-05	0	0	High
High	[R].DVNCSVMGPQEK.[K]	1xOxidation [M7]; 1xCarbamidomethyl [C4]; 1xHexNAc(2)Hex(5) [N3]	1	P53634	P53634 [51-62]	0	2596.02	HexNAc(2)Hex(5)	0	51	5.81	291.1	172	172	1.53934e-06	3.24038e-07	0	0	0.000200856	4.2774e-05	0	0	High
High	[K].SAEGTFFINK.[T]	1xHexNAc(2)Hex(7) [N9]	2	P06865	P06865 [149-158]	0	2654.09	HexNAc(2)Hex(7)	0	149	5.78	248.1	67.9	67.9	1.65442e-06	3.6003e-07	0	0	0.000215869	4.73021e-05	0	0	High
High	[K].NNHTASILDR.[M]	1xHexNAc(4)Hex(5)Fuc(1)NeuAc(1) [N2]	1	P08962	P08962 [129-138]	0	3200.31	HexNAc(4)Hex(5)Fuc(1)NeuAc(1)	0	129	5.76	325	67.5	67.5	1.73919e-06	3.69578e-07	0	0	0.000226928	4.8584e-05	0	0	High
High	[R].TVNVSVPK.[K]	1xHexNAc(2)Hex(6) [N3]	2	Q96KA5	Q96KA5 [89-96]	0	2221.97	HexNAc(2)Hex(6)	0	89	5.75	267.3	136.1	136.1	1.76275e-06	3.74468e-07	0	0	0.000230002	4.92404e-05	0	0	High
High	[K].IYIPLNK.[T]	1xHexNAc(2)Hex(9) [N6]	2	Q92542	Q92542 [40-46]	0	2725.16	HexNAc(2)Hex(9)	0	40	5.75	284.3	144.6	144.6	1.76275e-06	3.76904e-07	0	0	0.000230002	4.95673e-05	0	0	High
High	[R].IVDVNLTSEGK.[V]	1xHexNAc(4)Hex(5)Fuc(1)NeuAc(2) [N5]	1	Q9HD45	Q9HD45 [170-180]	0	3525.46	HexNAc(4)Hex(5)Fuc(1)NeuAc(2)	0	170	5.75	242.9	118.3	76.4	1.77264e-06	3.81771e-07	0	0	0.000231292	5.02204e-05	0	0	High
High	[R].LLNINPNK.[T]	1xHexNAc(3)Hex(6)Fuc(1) [N7]	2	P11279	P11279 [255-262]	0	2653.16	HexNAc(3)Hex(6)Fuc(1)	0	255	5.74	274.4	107.3	107.3	1.81144e-06	3.84266e-07	0	0	0.000236354	5.05552e-05	0	0	High
High	[R].TSIPTINMENK.[T]	1xHexNAc(2)Hex(9) [N10]; 1xOxidation [M8]	2	P26006	P26006 [960-970]	0	3128.26	HexNAc(2)Hex(9)	0	960	5.74	238.2	87.3	87.3	1.83281e-06	3.91741e-07	0	0	0.000239141	5.15579e-05	0	0	High
High	[K].LDNYSTQELGK.[T]	1xHexNAc(4)Hex(5)Fuc(1)NeuAc(1) [N3]	1	P21589	P21589 [331-341]	0	3327.35	HexNAc(4)Hex(5)Fuc(1)NeuAc(1)	0	331	5.74	255.6	83.1	83.1	1.83281e-06	3.94238e-07	0	0	0.000239141	5.18929e-05	0	0	High
High	[K].IYIPLNK.[T]	1xHexNAc(2)Hex(6) [N6]	1	Q92542	Q92542 [40-46]	0	2239	HexNAc(2)Hex(6)	0	40	5.73	258.8	131	131	1.85198e-06	3.99242e-07	0	0	0.000241641	5.25639e-05	0	0	High
High	[K].AAIPSALDTNSSK.[S]	1xHexNAc(2)Hex(9) [N10]	1	Q08380	Q08380 [542-554]	0	3139.29	HexNAc(2)Hex(9)	0	542	5.71	369.1	212.8	212.8	1.94005e-06	4.19752e-07	0	0	0.00025313	5.53132e-05	0	0	High
High	[R].GHTLTLNFTR.[N]	1xHexNAc(2)Hex(8) [N7]	1	P11279	P11279 [97-106]	0	2862.2	HexNAc(2)Hex(8)	0	97	5.69	241.3	79	79	2.05941e-06	4.38553e-07	0	0	0.0002687	5.78319e-05	0	0	High
High	[R].GYYNQSEAGSHTVQR.[M]	1xHexNAc(2)Hex(3)Fuc(1) [N4]	1	P01892	P01892 [107-121]	0	2735.14	HexNAc(2)Hex(3)Fuc(1)	0	107	5.68	273.2	106.7	106.7	2.07144e-06	4.44012e-07	0	0	0.00027027	5.8563e-05	0	0	High
High	[K].TLSPTGNISSAPK.[D]	1xHexNAc(2)Hex(6) [N7]	2	O94901	O94901 [726-738]	0	2651.16	HexNAc(2)Hex(6)	0	726	5.67	363.1	35.8	35.8	2.15347e-06	4.55225e-07	0	0	0.000280971	6.00642e-05	0	0	High
High	[K].NITIVTGAPR.[H]	1xHexNAc(2)Hex(3) [N1]	1	P26006	P26006 [265-274]	0	1933.92	HexNAc(2)Hex(3)	0	265	5.64	351.9	129.8	129.8	2.26488e-06	4.69999e-07	0	0	0.000295503	6.2042e-05	0	0	High
High	[R].VQPFNVTQGK.[Y]	1xHexNAc(4)Hex(5)Fuc(1)NeuAc(1) [N5]	1	P13473	P13473 [352-361]	0	3177.33	HexNAc(4)Hex(5)Fuc(1)NeuAc(1)	0	352	5.55	318.7	69.7	69.7	2.80028e-06	5.32956e-07	0	0	0.000365338	7.04632e-05	0	0	High
High	[R].LLNINPNK.[T]	1xHexNAc(5)Hex(6) [N7]	1	P11279	P11279 [255-262]	0	2913.26	HexNAc(5)Hex(6)	0	255	5.55	273.2	136	136	2.8381e-06	5.4391e-07	0	0	0.000370272	7.19276e-05	0	0	High
High	[R].LLNINPNK.[T]	1xHexNAc(2)Hex(3)Fuc(1) [N7]	1	P11279	P11279 [255-262]	0	1963.92	HexNAc(2)Hex(3)Fuc(1)	0	255	5.54	383.1	130.8	130.8	2.89839e-06	5.58655e-07	0	0	0.000378134	7.38983e-05	0	0	High
High	[R].NTTIFLK.[F]	1xHexNAc(2)Hex(6) [N1]	1	Q8NBN3	Q8NBN3 [62-68]	0	2214.96	HexNAc(2)Hex(6)	0	62	5.53	345.7	82.8	82.8	2.9432e-06	5.69839e-07	0	0	0.000383979	7.53926e-05	0	0	High
High	[K].CHEGNGTFECGACR.[C]	1xHexNAc(2)Hex(8) [N5]; 3xCarbamidomethyl [C1; C10; C13]	1	P05556	P05556 [477-490]	0	3357.2	HexNAc(2)Hex(8)	0	477	5.5	277.9	241.7	241.7	3.15438e-06	5.97019e-07	0	0	0.000411521	7.90234e-05	0	0	High
High	[R].EAINITLDHK.[C]	1xHexNAc(2)Hex(8) [N4]	1	O00469	O00469 [206-215]	0	2856.2	HexNAc(2)Hex(8)	0	206	5.44	292.6	114	114	3.59062e-06	6.2278e-07	0	0	0.000468412	8.2464e-05	0	0	High
High	[K].GQTEIQVNCPPAVTENK.[T]	1xDeamidated [N8]; 1xCarbamidomethyl [C9]; 1xHexNAc(3)Hex(6)NeuAc(1) [N16]	1	Q16563	Q16563 [56-72]	0	3758.55	HexNAc(3)Hex(6)NeuAc(1)	0	56	5.42	268.6	129.7	54.6	3.79084e-06	6.55833e-07	0	0	0.000494522	8.68774e-05	0	0	High
High	[K].TVTTSGTTNNTVTPTSQPVR.[K]	1xHexNAc(2)Hex(9) [N9]	1	Q04900	Q04900 [138-157]	0	3926.68	HexNAc(2)Hex(9)	0	138	5.41	225.3	159.5	159.5	3.88294e-06	6.75283e-07	0	0	0.000506531	8.94737e-05	0	0	High
High	[K].LIDNNKTEK.[E]	1xHexNAc(2)Hex(3)Fuc(1) [N5]	2	P07602	P07602 [328-336]	1	2112.95	HexNAc(2)Hex(3)Fuc(1)	0	328	5.38	382.9	113	113	4.15926e-06	7.00755e-07	0	0	0.000542562	9.28733e-05	0	0	High
High	[K].LKVPESENNK.[T]	1xHexNAc(2)Hex(6) [N9]	1	Q5JRA6	Q5JRA6 [238-247]	1	2536.09	HexNAc(2)Hex(6)	0	238	5.36	342	187.7	187.7	4.31904e-06	7.1675e-07	0	0	0.000563396	9.50076e-05	0	0	High
High	[K].NDRNSSDETFLK.[D]	1xHexNAc(2)Hex(3)Fuc(1) [N4]	1	Q14956	Q14956 [246-257]	1	2464.04	HexNAc(2)Hex(3)Fuc(1)	0	246	5.34	390	130.2	130.2	4.60438e-06	7.50151e-07	0	0	0.000600598	9.94638e-05	0	0	High
High	[R].NETHSICTACDESCK.[T]	1xHexNAc(2)Hex(6) [N1]; 3xCarbamidomethyl [C7; C10; C14]	1	Q6UXH1	Q6UXH1 [190-204]	0	3190.18	HexNAc(2)Hex(6)	0	190	5.28	216.8	198.2	198.2	5.21967e-06	8.48637e-07	0	0	0.000680815	0.000111795	0	0	High
High	[R].LKPLFNK.[S]	1xHexNAc(2)Hex(7) [N6]	1	P20645	P20645 [52-58]	0	2400.07	HexNAc(2)Hex(7)	0	52	5.28	291.9	148.9	148.9	5.21999e-06	8.54981e-07	0	0	0.000680856	0.000112643	0	0	High
High	[K].VINETWAWK.[N]	1xHexNAc(2)Hex(6) [N3]	1	Q9Y4L1	Q9Y4L1 [860-868]	0	2525.07	HexNAc(2)Hex(6)	0	860	5.28	233.6	41.5	41.5	5.23714e-06	8.67665e-07	0	0	0.000683092	0.000114338	0	0	High
High	[K].ENQNHSYSLK.[S]	1xHexNAc(2)Hex(6) [N4]	1	P06756	P06756 [942-951]	0	2598.05	HexNAc(2)Hex(6)	0	942	5.28	248.1	43.8	43.8	5.23714e-06	8.61332e-07	0	0	0.000683092	0.000113492	0	0	High
High	[R].AEPPLNASASDQGEK.[V]	1xHexNAc(3)Hex(3)Fuc(1) [N6]	2	Q9Y4L1	Q9Y4L1 [926-940]	0	2755.17	HexNAc(3)Hex(3)Fuc(1)	0	926	5.26	235.1	109.7	109.7	5.47163e-06	8.87236e-07	0	0	0.00071366	0.000116954	0	0	High
High	[R].SDLNPANGSYPFQALR.[Q]	1xHexNAc(2)Hex(6) [N7]	1	Q8NHP8	Q8NHP8 [509-524]	0	3128.33	HexNAc(2)Hex(6)	0	509	5.23	191.1	106.2	106.2	5.87179e-06	9.22787e-07	0	0	0.000765821	0.000121704	0	0	High
High	[R].GVFITNETGQPLIGK.[V]	1xHexNAc(2)Hex(8) [N6]	1	P10253	P10253 [465-479]	0	3276.44	HexNAc(2)Hex(8)	0	465	5.23	168.6	120.6	120.6	5.87179e-06	9.15696e-07	0	0	0.000765821	0.000120757	0	0	High
High	[K].MAAALNATGR.[P]	1xOxidation [M1]; 1xHexNAc(2)Hex(3) [N6]	1	P17050	P17050 [172-181]	0	1883.82	HexNAc(2)Hex(3)	0	172	5.22	335.5	191	191	6.05135e-06	9.37238e-07	0	0	0.000789225	0.000123635	0	0	High
High	[K].WQMNFTVR.[Y]	1xHexNAc(2)Hex(7) [N4]; 1xOxidation [M3]	1	P13473	P13473 [46-53]	0	2638.05	HexNAc(2)Hex(7)	0	46	5.21	264.6	68	68	6.15031e-06	9.59278e-07	0	0	0.000802124	0.000126578	0	0	High
High	[R].VCECNPNYTGSACDCSLDTSTCEASNGQICNGR.[G]	1xDeamidated [N5]; 6xCarbamidomethyl [C2; C4; C13; C15; C22; C30]; 1xHexNAc(1) [N7]	1	P05556	P05556 [578-610]	0	3961.5	HexNAc(1)	0	578	5.2	269.8	113.9	49.7	6.34132e-06	1.01152e-06	0	0	0.00082702	0.000133554	0	0	High
High	[K].TCDWLPKPNMSASCK.[E]	1xHexNAc(2)Hex(6) [N9]; 1xOxidation [M10]; 2xCarbamidomethyl [C2; C14]	1	P07602	P07602 [93-107]	0	3189.27	HexNAc(2)Hex(6)	0	93	5.12	166.9	87.1	87.1	7.53236e-06	1.12699e-06	0	0	0.000982232	0.000145863	0	0	High
High	[R].LLNINPNK.[T]	1xHexNAc(3)Hex(4) [N7]	1	P11279	P11279 [255-262]	0	2183	HexNAc(3)Hex(4)	0	255	5.11	310.4	161.5	161.5	7.70027e-06	1.13605e-06	0	0	0.00100411	0.000147081	0	0	High
High	[R].LVQLFPNDTSLK.[N]	1xHexNAc(2)Hex(6) [N7]	1	Q12797	Q12797 [446-457]	0	2753.24	HexNAc(2)Hex(6)	0	446	5.1	254.2	166.8	166.8	7.95881e-06	1.17293e-06	0	0	0.0010378	0.000152038	0	0	High
High	[R].VQPFNVTQGK.[Y]	1xHexNAc(6)Hex(4) [N5]	1	P13473	P13473 [352-361]	0	2984.29	HexNAc(6)Hex(4)	0	352	5.09	268	100.5	100.5	8.12094e-06	1.18243e-06	0	0	0.00105892	0.000153316	0	0	High
High	[K].YQTLNCSVNVNCVNIR.[C]	1xHexNAc(2)Hex(6) [N5]; 2xCarbamidomethyl [C6; C12]	1	P23229	P23229 [962-977]	0	3332.4	HexNAc(2)Hex(6)	0	962	5.08	223.3	168.1	168.1	8.35616e-06	1.19223e-06	0	0	0.00108956	0.000154632	0	0	High
High	[K].NQSIGLIQPFATNGK.[L]	1xHexNAc(2)Hex(8) [N1]	1	Q9UIQ6	Q9UIQ6 [145-159]	0	3290.43	HexNAc(2)Hex(8)	0	145	5.08	214.9	192.8	192.8	8.35616e-06	1.20201e-06	0	0	0.00108956	0.000155945	0	0	High
High	[R].LLNINPNK.[T]	1xHexNAc(4)Hex(5) [N7]	2	P11279	P11279 [255-262]	0	2548.13	HexNAc(4)Hex(5)	0	255	5.08	276.7	161.7	161.7	8.35666e-06	1.22147e-06	0	0	0.00108963	0.000158561	0	0	High
High	[K].NITIVTGAPR.[H]	1xHexNAc(4)Hex(5)NeuAc(2) [N1]	1	P26006	P26006 [265-274]	0	3246.38	HexNAc(4)Hex(5)NeuAc(2)	0	265	5.08	241.5	44.6	44.6	8.38389e-06	1.23121e-06	0	0	0.00109318	0.000159868	0	0	High
High	[K].HTNMNLTQLK.[V]	1xHexNAc(2)Hex(6) [N5]; 1xOxidation [M4]	1	Q15165	Q15165 [250-259]	0	2594.09	HexNAc(2)Hex(6)	0	250	5.02	300.2	75.8	75.8	9.58673e-06	1.35508e-06	0	0	0.00124986	0.000176496	0	0	High
High	[K].QNNGAFNETLFR.[N]	1xHexNAc(2)Hex(8) [N7]; 1xDeamidated [N3]	1	P02786	P02786 [721-732]	0	3114.24	HexNAc(2)Hex(8)	0	721	5.02	314.1	125.7	36.2	9.62549e-06	1.36612e-06	0	0	0.00125491	0.000177977	0	0	High
High	[K].ANFSIK.[I]	1xHexNAc(2)Hex(6) [N2]	1	Q6P179	Q6P179 [218-223]	0	2057.85	HexNAc(2)Hex(6)	0	218	5.01	238.1	58.6	58.6	9.67577e-06	1.3772e-06	0	0	0.00126146	0.000179464	0	0	High
High	[K].CHEGNGTFECGACR.[C]	1xHexNAc(2)Hex(6) [N5]; 3xCarbamidomethyl [C1; C10; C13]	1	P05556	P05556 [477-490]	0	3033.09	HexNAc(2)Hex(6)	0	477	5.01	198.8	163.1	163.1	9.86406e-06	1.39953e-06	0	0	0.00128598	0.000180979	0	0	High
High	[R].LNNITIIGPLDMK.[Q]	1xHexNAc(2)Hex(8) [N3]; 1xOxidation [M12]	1	Q9NUM4	Q9NUM4 [181-193]	0	3160.38	HexNAc(2)Hex(8)	0	181	4.99	200.3	109.5	109.5	1.01304e-05	1.42238e-06	0	0	0.00132067	0.000182538	0	0	High
High	[K].ISSLQTTEKNDTVAGQGER.[D]	1xHexNAc(2)Hex(6) [N10]	1	P06756	P06756 [865-883]	1	3412.49	HexNAc(2)Hex(6)	0	865	4.95	199.5	118	118	1.11064e-05	1.48365e-06	0	0	0.00144777	0.000189123	0	0	High
High	[K].IYIPLNK.[T]	1xHexNAc(2)Hex(8) [N6]	2	Q92542	Q92542 [40-46]	0	2563.11	HexNAc(2)Hex(8)	0	40	4.94	252.7	127	127	1.15637e-05	1.53589e-06	0	0	0.00150731	0.000196176	0	0	High
High	[R].LNPTVTYGNDSFSAK.[A]	1xHexNAc(2)Hex(7) [N9]	1	P05362	P05362 [259-273]	0	3154.31	HexNAc(2)Hex(7)	0	259	4.93	200.2	106.9	106.9	1.16291e-05	1.5491e-06	0	0	0.00151581	0.00019796	0	0	High
High	[K].ANTTQPGIVEGGQVLK.[C]	1xHexNAc(3)Hex(5)Fuc(1) [N2]	1	P06756	P06756 [73-88]	0	3177.43	HexNAc(3)Hex(5)Fuc(1)	0	73	4.92	147.2	82.7	82.7	1.20129e-05	1.56277e-06	0	0	0.00156578	0.000199805	0	0	High
High	[K].FLSSSPHLPPSSYFNASGR.[A]	1xHexNAc(2)Hex(3)Fuc(1) [N15]	1	O14773	O14773 [429-447]	0	3089.37	HexNAc(2)Hex(3)Fuc(1)	0	429	4.91	229.3	137.2	137.2	1.21715e-05	1.59041e-06	0	0	0.00158643	0.000203534	0	0	High
High	[R].NCSAAPQPEPAAGLASYPELR.[L]	1xCarbamidomethyl [C2]; 1xHexNAc(6)Hex(3) [N1]	1	O75718	O75718 [87-107]	0	3903.68	HexNAc(6)Hex(3)	0	87	4.9	227.5	191.6	191.6	1.26396e-05	1.64696e-06	0	0	0.00164736	0.000211162	0	0	High
High	[R].LENITTGTYTIHAQK.[E]	1xHexNAc(2)Hex(5) [N3]	1	Q5JPE7	Q5JPE7 [367-381]	0	2906.3	HexNAc(2)Hex(5)	0	367	4.83	169.3	69.3	69.3	1.48516e-05	1.74395e-06	0	0	0.00193522	0.000222181	0	0	High
High	[K].SLTTSLHNK.[T]	1xHexNAc(2)Hex(7) [N8]	1	Q92673	Q92673 [1887-1895]	0	2541.07	HexNAc(2)Hex(7)	0	1887	4.82	246.3	64.9	64.9	1.52276e-05	1.7956e-06	0	0	0.00198413	0.000229154	0	0	High
High	[K].TLSPTGNISSAPK.[D]	1xHexNAc(2)Hex(5) [N7]	1	O94901	O94901 [726-738]	0	2489.1	HexNAc(2)Hex(5)	0	726	4.82	265	19.4	19.4	1.52837e-05	1.81287e-06	0	0	0.00199143	0.000231485	0	0	High
High	[R].NFSSCSAEDFEK.[L]	1xHexNAc(2)Hex(8) [N1]; 1xCarbamidomethyl [C5]	1	Q13443	Q13443 [381-392]	0	3123.15	HexNAc(2)Hex(8)	0	381	4.79	230.6	149	149	1.61925e-05	1.8656e-06	0	0	0.00210965	0.0002386	0	0	High
High	[K].NVSCLWCNTNK.[A]	1xHexNAc(2)Hex(8) [N1]; 2xCarbamidomethyl [C4; C7]	1	P53801	P53801 [54-64]	0	3098.2	HexNAc(2)Hex(8)	0	54	4.79	224.3	144.4	144.4	1.61925e-05	1.88385e-06	0	0	0.00210965	0.000241062	0	0	High
High	[K].MNFTGGDTCHK.[V]	1xHexNAc(2)Hex(9) [N2]; 1xOxidation [M1]; 1xCarbamidomethyl [C9]	1	P11717	P11717 [1311-1321]	0	3148.15	HexNAc(2)Hex(9)	0	1311	4.74	227	174.3	174.3	1.82935e-05	2.00211e-06	0	0	0.00238287	0.000257004	0	0	High
High	[K].NQSVPLSCCR.[E]	1xHexNAc(2)Hex(7) [N1]; 2xCarbamidomethyl [C8; C9]	1	O60637	O60637 [167-176]	0	2761.08	HexNAc(2)Hex(7)	0	167	4.73	152.2	101.3	101.3	1.85848e-05	2.04368e-06	0	0	0.00242074	0.000262606	0	0	High
High	[K].NLTVCPDGALFEQK.[G]	1xHexNAc(2)Hex(8) [N1]; 1xCarbamidomethyl [C5]	1	P54709	P54709 [124-137]	0	3294.36	HexNAc(2)Hex(8)	0	124	4.69	162.9	97.1	97.1	2.04757e-05	2.10875e-06	0	0	0.00266652	0.00027137	0	0	High
High	[K].YYNYTLSINGK.[A]	1xHexNAc(2)Hex(3)Fuc(1) [N3]	2	P15586	P15586 [181-191]	0	2374.03	HexNAc(2)Hex(3)Fuc(1)	0	181	4.69	231.4	114.6	114.6	2.04875e-05	2.13181e-06	0	0	0.00266806	0.000274474	0	0	High
High	[R].VQPFNVTQGK.[Y]	1xHexNAc(5)Hex(6)Fuc(1)NeuAc(1) [N5]	1	P13473	P13473 [352-361]	0	3542.47	HexNAc(5)Hex(6)Fuc(1)NeuAc(1)	0	352	4.68	241.2	86.8	86.8	2.07572e-05	2.15515e-06	0	0	0.0027031	0.000277616	0	0	High
High	[K].ANTTQPGIVEGGQVLK.[C]	1xHexNAc(3)Hex(4)Fuc(1) [N2]	1	P06756	P06756 [73-88]	0	3015.38	HexNAc(3)Hex(4)Fuc(1)	0	73	4.63	168.2	81.2	81.2	2.34055e-05	2.25665e-06	0	0	0.00304716	0.000287956	0	0	High
High	[R].LNITQEGPK.[D]	1xHexNAc(2)Hex(5) [N2]	1	Q5NDL2	Q5NDL2 [353-361]	0	2215.97	HexNAc(2)Hex(5)	0	353	4.63	224.2	98.2	98.2	2.36082e-05	2.28324e-06	0	0	0.00307348	0.000291541	0	0	High
High	[K].CNMINGTDGDSFHPLITK.[D]	1xCarbamidomethyl [C1]; 1xHexNAc(6)Hex(3) [N5]	1	Q14108	Q14108 [245-262]	0	3724.56	HexNAc(6)Hex(3)	0	245	4.59	134.8	53.7	53.7	2.58257e-05	2.42169e-06	0	0	0.00336141	0.000306455	0	0	High
High	[R].YHYNGTFEDGK.[K]	1xHexNAc(2)Hex(6) [N4]	1	Q96AY3	Q96AY3 [67-77]	0	2709.05	HexNAc(2)Hex(6)	0	67	4.59	232.6	75.3	75.3	2.59872e-05	2.45082e-06	0	0	0.00338238	0.000310388	0	0	High
High	[K].HMSLALNR.[T]	1xHexNAc(2)Hex(7) [N7]; 1xOxidation [M2]	1	P06280	P06280 [186-193]	0	2498.02	HexNAc(2)Hex(7)	0	186	4.56	243.6	42.7	42.7	2.74968e-05	2.57213e-06	0	0	0.00357831	0.000326761	0	0	High
High	[K].GELNTSIFSSR.[P]	1xHexNAc(2)Hex(8) [N4]	2	Q9UHG3	Q9UHG3 [350-360]	0	2913.19	HexNAc(2)Hex(8)	0	350	4.56	283.2	81.8	81.8	2.74993e-05	2.60275e-06	0	0	0.00357864	0.000330893	0	0	High
High	[R].AEPPLNASASDQGEK.[V]	1xHexNAc(2)Hex(8) [N6]	1	Q9Y4L1	Q9Y4L1 [926-940]	0	3216.29	HexNAc(2)Hex(8)	0	926	4.53	157.2	62.5	62.5	2.93283e-05	2.69807e-06	0	0	0.00381593	0.000343749	0	0	High
High	[R].MDPPCTNTTAASTYLNNPYVR.[K]	1xOxidation [M1]; 1xCarbamidomethyl [C5]; 1xHexNAc(6)Hex(3) [N7]	1	P10619	P10619 [327-347]	0	4106.71	HexNAc(6)Hex(3)	0	327	4.53	199.7	138.4	75.9	2.93556e-05	2.73065e-06	0	0	0.00381947	0.000348143	0	0	High
High	[R].NLSAPVTLNLR.[D]	1xHexNAc(2)Hex(7) [N1]	1	O00754	O00754 [930-940]	0	2738.22	HexNAc(2)Hex(7)	0	930	4.51	209.6	145.6	145.6	3.12043e-05	2.93208e-06	0	0	0.00405925	0.000375289	0	0	High
High	[K].LIDNNKTEK.[E]	1xHexNAc(2)Hex(2)Fuc(1) [N5]	1	P07602	P07602 [328-336]	1	1950.9	HexNAc(2)Hex(2)Fuc(1)	0	328	4.5	400.7	129.6	129.6	3.16796e-05	3.00118e-06	0	0	0.00412087	0.000384597	0	0	High
High	[K].NNHTASILDR.[M]	1xHexNAc(2)Hex(6) [N2]	1	P08962	P08962 [129-138]	0	2519.05	HexNAc(2)Hex(6)	0	129	4.45	269.7	41.1	41.1	3.52431e-05	3.04017e-06	0	0	0.00458274	0.000389844	0	0	High
High	[R].TILVDNNTWNNTHISR.[V]	1xHexNAc(2)Hex(8) [N10]	1	P46977	P46977 [539-554]	0	3600.53	HexNAc(2)Hex(8)	0	539	4.45	174.7	62.9	39.3	3.585e-05	3.07979e-06	0	0	0.00466138	0.000395177	0	0	High
High	[R].EAGNHTSGAGLVQINK.[S]	1xHexNAc(6)Hex(7) [N4]	1	P20645	P20645 [80-95]	0	3948.66	HexNAc(6)Hex(7)	0	80	4.43	220.6	147.4	123.7	3.71573e-05	3.24204e-06	0	0	0.00483071	0.000411545	0	0	High
High	[R].ELAVPDGYTNR.[T]	1xHexNAc(2)Hex(10) [N10]	1	P26006	P26006 [77-87]	0	3261.29	HexNAc(2)Hex(10)	0	77	4.41	184.9	120.2	120.2	3.90429e-05	3.45138e-06	0	0	0.00507487	0.000434079	0	0	High
High	[R].TSIPTINMENK.[T]	1xHexNAc(2)Hex(7) [N10]	1	P26006	P26006 [960-970]	0	2788.16	HexNAc(2)Hex(7)	0	960	4.41	230.8	109.8	109.8	3.90429e-05	3.49385e-06	0	0	0.00507487	0.000439815	0	0	High
High	[R].ELAVPDGYTNR.[T]	1xHexNAc(4)Hex(5)Fuc(1)NeuAc(1) [N10]	1	P26006	P26006 [77-87]	0	3294.34	HexNAc(4)Hex(5)Fuc(1)NeuAc(1)	0	77	4.4	193.2	81.2	81.2	4.02304e-05	3.53764e-06	0	0	0.00522858	0.000445727	0	0	High
High	[R].DHHGANFSCR.[T]	1xCarbamidomethyl [C9]; 1xHexNAc(6)Hex(7)Fuc(1)NeuAc(2) [N6]	2	P05362	P05362 [178-187]	0	4281.59	HexNAc(6)Hex(7)Fuc(1)NeuAc(2)	0	178	4.35	212.2	97.7	97.7	4.46302e-05	3.99666e-06	0	0	0.00579781	0.00050765	0	0	High
High	[K].SLTTSLHNK.[T]	1xHexNAc(2)Hex(5) [N8]	1	Q92673	Q92673 [1887-1895]	0	2216.97	HexNAc(2)Hex(5)	0	1887	4.35	215.9	81.7	81.7	4.46302e-05	4.04447e-06	0	0	0.00579781	0.000514093	0	0	High
High	[K].FLSSSPHLPPSSYFNASGR.[A]	1xHexNAc(2)Hex(3) [N15]	1	O14773	O14773 [429-447]	0	2943.32	HexNAc(2)Hex(3)	0	429	4.32	167.1	71.9	71.9	4.74033e-05	4.19153e-06	0	0	0.00615631	0.000533909	0	0	High
High	[R].LAVTNTTMTGTVLK.[M]	1xHexNAc(2)Hex(7) [N5]; 1xOxidation [M8]	1	Q13586	Q13586 [167-180]	0	3006.32	HexNAc(2)Hex(7)	0	167	4.32	210.6	53.2	53.2	4.83465e-05	4.24324e-06	0	0	0.0062782	0.000540872	0	0	High
High	[K].LNQTEPVAGNYYPVNTR.[I]	1xHexNAc(2)Hex(3)Fuc(1) [N2]; 1xDeamidated [Q3]	1	O00754	O00754 [765-781]	0	2975.32	HexNAc(2)Hex(3)Fuc(1)	0	765	4.29	147.2	146.1	40.3	5.17293e-05	4.71954e-06	0	0	0.00671516	0.00059092	0	0	High
High	[R].GNVISSHGNPILLNSSIPEDPSIK.[A]	1xHexNAc(6)Hex(3) [N14]	1	P21589	P21589 [298-321]	0	4192.94	HexNAc(6)Hex(3)	0	298	4.28	153.6	62.1	17.1	5.21983e-05	4.77449e-06	0	0	0.00677573	0.000598345	0	0	High
High	[R].GVFITNETGQPLIGK.[V]	1xHexNAc(2)Hex(7) [N6]	1	P10253	P10253 [465-479]	0	3114.39	HexNAc(2)Hex(7)	0	465	4.28	78.5	69	69	5.2874e-05	4.8301e-06	0	0	0.00686296	0.000605857	0	0	High
High	[K].LGVIEDHSNR.[T]	1xHexNAc(2)Hex(8) [N9]	1	P14625	P14625 [494-503]	0	2842.16	HexNAc(2)Hex(8)	0	494	4.26	162.7	43.1	43.1	5.50729e-05	4.88812e-06	0	0	0.00714678	0.00061369	0	0	High
High	[R].GSSQPNLSTSHSEQEYGK.[A]	1xHexNAc(2)Hex(3)Fuc(1) [N6]	1	O95208	O95208 [171-188]	0	2974.24	HexNAc(2)Hex(3)Fuc(1)	0	171	4.24	155.9	76.2	76.2	5.78412e-05	5.12716e-06	0	0	0.0075039	0.000645949	0	0	High
High	[R].TNSTFVQALVEHVK.[E]	1xHexNAc(2)Hex(4)Fuc(1) [N2]	1	P07602	P07602 [214-227]	0	2773.27	HexNAc(2)Hex(4)Fuc(1)	0	214	4.23	180.3	38	38	5.83747e-05	5.31014e-06	0	0	0.0075727	0.000670629	0	0	High
High	[R].YYNQSEAGSHTLQR.[M]	1xHexNAc(2)Hex(8) [N3]	1	P30485	P30485 [108-121]	0	3356.34	HexNAc(2)Hex(8)	0	108	4.23	188.8	49.1	49.1	5.83747e-05	5.1883e-06	0	0	0.0075727	0.000654195	0	0	High
High	[K].YYNYTLSINGK.[A]	1xDeamidated [N9]; 1xHexNAc(2)Hex(3) [N3]	1	P15586	P15586 [181-191]	0	2228.96	HexNAc(2)Hex(3)	0	181	4.22	179.9	56.5	56.5	6.00744e-05	5.3728e-06	0	0	0.00779184	0.000679076	0	0	High
High	[R].NCSAAPQPEPAAGLASYPELR.[L]	1xHexNAc(2)Hex(6) [N1]; 1xDeamidated [Q7]; 1xCarbamidomethyl [C2]	1	O75718	O75718 [87-107]	0	3578.51	HexNAc(2)Hex(6)	0	87	4.18	170.9	95.7	95.7	6.62938e-05	5.95796e-06	0	0	0.00859307	0.000748777	0	0	High
High	[K].ISSLQTTEKNDTVAGQGER.[D]	1xHexNAc(2)Hex(8) [N10]; 1xDeamidated [Q16]	1	P06756	P06756 [865-883]	1	3737.58	HexNAc(2)Hex(8)	0	865	4.17	279.7	118.8	55.2	6.80203e-05	6.02817e-06	0	0	0.00881532	0.000758245	0	0	High
High	[K].NTTAPPK.[I]	1xHexNAc(2)Hex(3)Fuc(1) [N1]	1	Q96PD2	Q96PD2 [474-480]	0	1766.77	HexNAc(2)Hex(3)Fuc(1)	0	474	4.14	245	45.5	45.5	7.28612e-05	6.45818e-06	0	0	0.00943802	0.000816201	0	0	High
High	[R].TSIPTINMENK.[T]	1xOxidation [M8]; 1xHexNAc(5)Hex(6)Fuc(1) [N10]	1	P26006	P26006 [960-970]	0	3397.4	HexNAc(5)Hex(6)Fuc(1)	0	960	4.14	169.1	68.5	68.5	7.29456e-05	6.5328e-06	0	0	0.00944888	0.000826251	0	0	High
High	[R].TTLVDNNTWNNSHIALVGK.[A]	1xHexNAc(2)Hex(9) [N6]	1	Q8TCJ2	Q8TCJ2 [618-636]	0	3961.71	HexNAc(2)Hex(9)	0	618	4.08	122	22.3	0.8	8.32323e-05	7.17879e-06	0	0	0.0107701	0.00091314	0	0	High
High	[K].AAIPSALDTNSSK.[S]	1xHexNAc(5)Hex(6)Fuc(1)NeuAc(1) [N10]	1	Q08380	Q08380 [542-554]	0	3699.53	HexNAc(5)Hex(6)Fuc(1)NeuAc(1)	0	542	4.07	193.2	35.1	35.1	8.59467e-05	7.43488e-06	0	0	0.0111182	0.000958961	0	0	High
High	[K].ENTSDPSLVIAFGR.[G]	1xHexNAc(4)Hex(5)Fuc(1)NeuAc(1) [N2]	1	P11279	P11279 [83-96]	0	3565.49	HexNAc(4)Hex(5)Fuc(1)NeuAc(1)	0	83	4.07	168.2	51.3	51.3	8.59467e-05	7.60858e-06	0	0	0.0111182	0.000993833	0	0	High
High	[R].AGPNGTLFVADAYK.[G]	1xHexNAc(2)Hex(8) [N4]	1	Q9HDC9	Q9HDC9 [157-170]	0	3126.3	HexNAc(2)Hex(8)	0	157	4.07	221.7	58.8	58.8	8.59467e-05	7.52182e-06	0	0	0.0111182	0.000970612	0	0	High
High	[R].DVNCSVMGPQEK.[K]	1xHexNAc(2)Hex(7) [N3]; 1xOxidation [M7]; 1xCarbamidomethyl [C4]	1	P53634	P53634 [51-62]	0	2920.12	HexNAc(2)Hex(7)	0	51	4.05	184.5	45.1	45.1	8.82226e-05	7.69765e-06	0	0	0.01141	0.00100574	0	0	High
High	[R].TSIPTINMENK.[T]	1xHexNAc(2)Hex(8) [N10]; 1xOxidation [M8]	1	P26006	P26006 [960-970]	0	2966.21	HexNAc(2)Hex(8)	0	960	4.05	172.6	66.4	66.4	8.82226e-05	7.78653e-06	0	0	0.01141	0.00101761	0	0	High
High	[K].TNITLVCK.[P]	1xHexNAc(2)Hex(8) [N2]; 1xCarbamidomethyl [C7]	1	P11717	P11717 [580-587]	0	2651.1	HexNAc(2)Hex(8)	0	580	4.04	176.5	48.5	48.5	9.12153e-05	7.96856e-06	0	0	0.0117935	0.00114025	0.00113895	0.0012547	High
High	[R].VQPFNVTQGK.[Y]	1xHexNAc(3)Hex(4)NeuAc(1) [N5]	3	P13473	P13473 [352-361]	0	2666.14	HexNAc(3)Hex(4)NeuAc(1)	0	352	4.02	189.9	43.4	43.4	9.63424e-05	8.06578e-06	0	0	0.0124499	0.00114025	0.00113766	0.00125313	High
High	[K].ENTSDPSLVIAFGR.[G]	1xHexNAc(3)Hex(4)Fuc(1) [N2]	1	P11279	P11279 [83-96]	0	2909.27	HexNAc(3)Hex(4)Fuc(1)	0	83	4.02	192.3	73.6	73.6	9.64626e-05	8.16292e-06	0	0	0.0124653	0.00114025	0.00113636	0.00125156	High
High	[R].NNVITLNITGK.[A]	1xHexNAc(2)Hex(6) [N7]	2	P16278	P16278 [458-468]	0	2565.15	HexNAc(2)Hex(6)	0	458	4	206.6	135.3	135.3	9.91446e-05	8.45879e-06	0	0	0.0128084	0.00114025	0.00113379	0.00124844	High
High	[R].GSSQPNLSTSHSEQEYGK.[A]	1xHexNAc(2)Hex(3) [N6]	1	O95208	O95208 [171-188]	0	2828.19	HexNAc(2)Hex(3)	0	171	4	146.2	66	66	9.92001e-05	8.55807e-06	0	0	0.0128155	0.00114025	0.0011325	0.00124688	High
High	[R].LNNITIIGPLDMK.[Q]	1xHexNAc(2)Hex(7) [N3]; 1xOxidation [M12]	1	Q9NUM4	Q9NUM4 [181-193]	0	2998.33	HexNAc(2)Hex(7)	0	181	4	181.7	111.8	111.8	0.000100476	8.65853e-06	0	0	0.0129787	0.00114025	0.00113122	0.00124533	High
High	[R].GPGIKPNQTSK.[M]	1xHexNAc(2)Hex(3)Fuc(1) [N7]	2	P15586	P15586 [356-366]	0	2165	HexNAc(2)Hex(3)Fuc(1)	0	356	3.98	220.2	63.5	63.5	0.00010386	8.96496e-06	0	0	0.0134111	0.00114025	0.00112613	0.00123916	High
High	[K].EQYIHENYSR.[A]	1xHexNAc(2)Hex(6) [N7]	1	O60568	O60568 [542-551]	0	2717.08	HexNAc(2)Hex(6)	0	542	3.97	195.9	71.2	71.2	0.00010765	9.28535e-06	0	0	0.0138951	0.00114025	0.00112108	0.00123305	High
High	[R].LLNINPNK.[T]	1xHexNAc(3)Hex(6)NeuAc(1) [N7]	1	P11279	P11279 [255-262]	0	2798.2	HexNAc(3)Hex(6)NeuAc(1)	0	255	3.96	186.2	78.5	78.5	0.000108432	9.60688e-06	0	0	0.013995	0.00114025	0.00111732	0.00123001	High
High	[K].DTCTQECSYFNITK.[V]	1xHexNAc(2)Hex(8) [N11]; 1xDeamidated [Q5]; 2xCarbamidomethyl [C3; C7]	1	P05556	P05556 [659-672]	0	3470.3	HexNAc(2)Hex(8)	0	659	3.94	137.3	92.7	92.7	0.00011529	9.72114e-06	0	0	0.0148698	0.00114025	0.00111607	0.0012285	High
High	[R].LLNINPNK.[T]	1xHexNAc(3)Hex(5)NeuAc(1) [N7]	1	P11279	P11279 [255-262]	0	2636.14	HexNAc(3)Hex(5)NeuAc(1)	0	255	3.89	185.7	52.2	52.2	0.00012795	1.07028e-05	0	0	0.0164815	0.00222469	0.00220751	0.00243309	High
High	[K].TAVNCSSDFDACLITK.[A]	2xCarbamidomethyl [C5; C12]; 1xHexNAc(4)Hex(5)Fuc(1)NeuAc(2) [N4]	2	P13987	P13987 [40-55]	0	4152.64	HexNAc(4)Hex(5)Fuc(1)NeuAc(2)	1	40	3.89	197.3	110.3	42.4	0.000129428	1.09566e-05	0	0	0.0166694	0.00222469	0.00220022	0.00242424	High
High	[K].GQTEIQVNCPPAVTENK.[T]	1xDeamidated [N8]; 1xCarbamidomethyl [C9]; 1xHexNAc(2)Hex(5) [N16]	1	Q16563	Q16563 [56-72]	0	3102.32	HexNAc(2)Hex(5)	0	56	3.86	208	136.9	40.9	0.000136626	1.17458e-05	0	0	0.0175836	0.00222469	0.00217865	0.00240096	High
High	[K].TCDWLPKPNMSASCK.[E]	1xHexNAc(2)Hex(8) [N9]; 1xOxidation [M10]; 2xCarbamidomethyl [C2; C14]	1	P07602	P07602 [93-107]	0	3513.37	HexNAc(2)Hex(8)	0	93	3.86	116.7	53.4	53.4	0.000139475	1.20167e-05	0	0	0.0179451	0.00222469	0.00217391	0.00239521	High
High	[K].LVGGPVAGGDPNQTIR.[G]	1xHexNAc(2)Hex(6) [N12]	1	O15230	O15230 [84-99]	0	2929.3	HexNAc(2)Hex(6)	0	84	3.86	166.8	24.8	24.8	0.000139556	1.21518e-05	0	0	0.0179554	0.00222469	0.00217155	0.00239234	High
High	[K].QDILNNSLTTLSQDITK.[V]	1xHexNAc(2)Hex(6) [N5]	1	Q70UQ0	Q70UQ0 [140-156]	0	3282.47	HexNAc(2)Hex(6)	0	140	3.85	72	72	72	0.000141209	1.24229e-05	0	0	0.0181651	0.0043431	0.00433369	0.00477897	High
High	[R].TSIPTINMENK.[T]	1xOxidation [M8]; 1xHexNAc(5)Hex(6)NeuAc(1) [N10]	1	P26006	P26006 [960-970]	0	3542.43	HexNAc(5)Hex(6)NeuAc(1)	0	960	3.84	182	58	58	0.000143082	1.26974e-05	0	0	0.0184025	0.0043431	0.00432432	0.00476758	High
High	[R].LENITTGTYTIHAQK.[E]	1xHexNAc(2)Hex(9) [N3]	1	Q5JPE7	Q5JPE7 [367-381]	0	3554.51	HexNAc(2)Hex(9)	0	367	3.84	232.3	50.1	50.1	0.000145249	1.29765e-05	0	0	0.0186771	0.0043431	0.00431499	0.0047619	High
High	[K].NLTLR.[C]	1xHexNAc(2)Hex(7) [N1]	1	P05362	P05362 [130-134]	0	2156.91	HexNAc(2)Hex(7)	0	130	3.83	169.5	51.6	51.6	0.000146969	1.32564e-05	0	0	0.018895	0.0043431	0.00429645	0.00473934	High
High	[K].IYIPLNK.[T]	1xHexNAc(2)Hex(7) [N6]	1	Q92542	Q92542 [40-46]	0	2401.05	HexNAc(2)Hex(7)	0	40	3.83	182.3	59.1	59.1	0.000146969	1.35367e-05	0	0	0.018895	0.0043431	0.00427807	0.00472255	High
High	[K].NMTFDLPSDATVVLNR.[S]	1xHexNAc(2)Hex(4) [N1]	1	P11279	P11279 [62-77]	0	2847.26	HexNAc(2)Hex(4)	0	62	3.82	50.8	50.8	5.2	0.000151267	1.39623e-05	0	0	0.0194391	0.0043431	0.00425985	0.00470035	High
High	[K].ISSLQTTEKNDTVAGQGER.[D]	1xHexNAc(2)Hex(7) [N10]	1	P06756	P06756 [865-883]	1	3574.54	HexNAc(2)Hex(7)	0	865	3.81	203.2	79.9	79.9	0.000156267	1.44016e-05	0	0	0.0200715	0.0043431	0.00424178	0.00467836	High
High	[R].EAGNHTSGAGLVQINK.[S]	1xHexNAc(4)Hex(5)Fuc(1)NeuAc(2) [N4]	1	P20645	P20645 [80-95]	0	3946.64	HexNAc(4)Hex(5)Fuc(1)NeuAc(2)	0	80	3.8	201.1	19	19	0.00015917	1.47e-05	0	0	0.0204384	0.0043431	0.00422833	0.00466744	High
High	[K].TCDWLPKPNMSASCK.[E]	1xHexNAc(2)Hex(4) [N9]; 1xOxidation [M10]; 2xCarbamidomethyl [C2; C14]	2	P07602	P07602 [93-107]	0	2865.16	HexNAc(2)Hex(4)	0	93	3.8	130.9	44.9	44.9	0.00016013	1.4851e-05	0	0	0.0205598	0.0043431	0.00422386	0.004662	High
High	[K].CCGAANYTDWEK.[I]	1xHexNAc(2)Hex(7) [N6]; 2xCarbamidomethyl [C1; C2]	1	P08962	P08962 [145-156]	0	3015.1	HexNAc(2)Hex(7)	0	145	3.79	187.9	130.7	130.7	0.000161789	1.51538e-05	0	0	0.0207692	0.0043431	0.00421496	0.00465658	High
High	[R].GHTLTLNFTR.[N]	1xHexNAc(2)Hex(5) [N7]	1	P11279	P11279 [97-106]	0	2376.04	HexNAc(2)Hex(5)	0	97	3.78	226.3	92.5	92.5	0.000167437	1.57799e-05	0	0	0.021482	0.0043431	0.00419727	0.00463499	High
High	[R].VQPFNVTQGK.[Y]	1xHexNAc(2)Hex(9) [N5]	1	P13473	P13473 [352-361]	0	2982.23	HexNAc(2)Hex(9)	0	352	3.78	158.3	99.6	99.6	0.000167437	1.56233e-05	0	0	0.021482	0.0043431	0.00420168	0.00464037	High
High	[R].NNVITLNITGK.[A]	1xHexNAc(2)Hex(5) [N7]	1	P16278	P16278 [458-468]	0	2403.1	HexNAc(2)Hex(5)	0	458	3.75	169.2	70.5	70.5	0.000176928	1.59461e-05	0	0	0.022678	0.0052356	0.00522466	0.00576701	High
High	[R].LNSSTIK.[Y]	1xHexNAc(2)Hex(3) [N2]	1	P13473	P13473 [274-280]	0	1654.75	HexNAc(2)Hex(3)	0	274	3.72	270	21.5	21.5	0.000189116	1.66401e-05	0	0	0.0242106	0.0052356	0.0051975	0.00573394	High
High	[R].DHHGANFSCR.[T]	1xCarbamidomethyl [C9]; 1xHexNAc(8)Hex(9) [N6]	1	P05362	P05362 [178-187]	0	4283.61	HexNAc(8)Hex(9)	1	178	3.72	109.7	35.9	35.9	0.000189895	1.68178e-05	0	0	0.0243083	0.0052356	0.00519211	0.00572738	High
High	[K].WQMNFTVR.[Y]	1xOxidation [M3]; 1xHexNAc(2)Hex(3) [N4]	1	P13473	P13473 [46-53]	0	1989.84	HexNAc(2)Hex(3)	0	46	3.71	216	77.3	77.3	0.000196543	1.80736e-05	0	0	0.0251425	0.00621118	0.00617284	0.00681818	High
High	[R].VFGSQNLTTVK.[L]	1xHexNAc(2)Hex(3) [N6]	1	Q9Y4L1	Q9Y4L1 [510-520]	0	2085.97	HexNAc(2)Hex(3)	0	510	3.7	174.1	60.1	60.1	0.000199412	1.86201e-05	0	0	0.0255021	0.00621118	0.00615385	0.00679502	High
High	[R].GPGIKPNQTSK.[M]	1xHexNAc(2)Hex(6) [N7]	1	P15586	P15586 [356-366]	0	2505.1	HexNAc(2)Hex(6)	0	356	3.69	201.2	80	80	0.000203546	1.93657e-05	0	0	0.0260201	0.00621118	0.00613497	0.00677201	High
High	[K].NITIVTGAPR.[H]	1xHexNAc(3)Hex(4)NeuAc(1) [N1]	1	P26006	P26006 [265-274]	0	2590.15	HexNAc(3)Hex(4)NeuAc(1)	0	265	3.69	187.3	70.6	70.6	0.000205637	1.97407e-05	0	0	0.0262818	0.00621118	0.00611621	0.00674916	High
High	[R].NGSSIVDLSPLIHR.[T]	1xHexNAc(3)Hex(6)NeuAc(1) [N1]	1	P11717	P11717 [1656-1669]	0	3380.47	HexNAc(3)Hex(6)NeuAc(1)	0	1656	3.68	149.1	5.1	5.1	0.000210508	2.01243e-05	0	0	0.0268913	0.00712831	0.00711382	0.00784753	High
High	[K].ENTSDPSLVIAFGR.[G]	1xHexNAc(2)Hex(5) [N2]	1	P11279	P11279 [83-96]	0	2722.18	HexNAc(2)Hex(5)	0	83	3.67	42.8	42.8	42.8	0.000211648	2.07001e-05	0	0	0.0270338	0.00712831	0.0070922	0.00782123	High
High	[R].SDLNPANGSYPFQALR.[Q]	1xHexNAc(2)Hex(4) [N7]; 1xDeamidated [N4]	1	Q8NHP8	Q8NHP8 [509-524]	0	2805.21	HexNAc(2)Hex(4)	0	509	3.67	51.3	51.3	51.3	0.000212641	2.10843e-05	0	0	0.0271578	0.00712831	0.00707786	0.00780379	High
High	[K].DMSDGFISNLTIQR.[Q]	1xHexNAc(2)Hex(7) [N9]; 1xOxidation [M2]	1	P13674	P13674 [105-118]	0	3153.29	HexNAc(2)Hex(7)	0	105	2.96	109.8	54	54	0.00109018	3.44035e-05	0	0	0.107058	0.00903614	0.00885827	0.00978261	High
High	[R].AEPPLNASASDQGEK.[V]	1xHexNAc(2)Hex(7) [N6]	1	Q9Y4L1	Q9Y4L1 [926-940]	0	3054.24	HexNAc(2)Hex(7)	0	926	2.87	111.1	62	62	0.0013628	3.77897e-05	0	0	0.129285	0.00903614	0.00884086	0.00976139	High
High	[K].SAEGTFFINK.[T]	1xHexNAc(2)Hex(5) [N9]	1	P06865	P06865 [149-158]	0	2329.98	HexNAc(2)Hex(5)	0	149	2.86	139.1	55	55	0.00139614	4.04221e-05	0	0	0.131929	0.0108055	0.0107843	0.0119048	High
High	[R].LNITQEGPK.[D]	1xHexNAc(2)Hex(3)Fuc(1) [N2]	1	Q5NDL2	Q5NDL2 [353-361]	0	2037.92	HexNAc(2)Hex(3)Fuc(1)	0	353	2.86	159	33.9	33.9	0.00139614	3.91072e-05	0	0	0.131929	0.0108055	0.0107949	0.0119177	High
High	[K].NITIVTGAPR.[H]	1xHexNAc(3)Hex(6)NeuAc(1) [N1]	1	P26006	P26006 [265-274]	0	2914.26	HexNAc(3)Hex(6)NeuAc(1)	0	265	2.85	220.7	8	8	0.00139951	4.17378e-05	0	0	0.132196	0.0117647	0.0117417	0.012959	High
High	[R].MSVINFECNK.[T]	1xOxidation [M1]; 1xCarbamidomethyl [C8]; 1xHexNAc(4)Hex(5)Fuc(1)NeuAc(1) [N9]	1	P11717	P11717 [427-436]	0	3317.3	HexNAc(4)Hex(5)Fuc(1)NeuAc(1)	0	427	2.85	153.4	11.6	11.6	0.00139951	4.30509e-05	0	0	0.132196	0.0117647	0.0117302	0.012945	High
High	[R].AGPNGTLFVADAYK.[G]	1xHexNAc(2)Hex(7) [N4]	1	Q9HDC9	Q9HDC9 [157-170]	0	2964.25	HexNAc(2)Hex(7)	0	157	2.78	159.3	29	29	0.00165144	5.22133e-05	0	0	0.15166	0.0126582	0.0125604	0.0138741	High
High	[R].ALGFENATQALGR.[A]	1xHexNAc(3)Hex(4)Fuc(1)NeuAc(1) [N6]	1	Q08380	Q08380 [64-76]	0	3042.3	HexNAc(3)Hex(4)Fuc(1)NeuAc(1)	0	64	2.78	187.2	21.3	21.3	0.00165144	5.37496e-05	0	0	0.15166	0.0126582	0.0125483	0.0138593	High
High	[K].TLSPTGNISSAPK.[D]	1xHexNAc(2)Hex(9) [N7]	1	O94901	O94901 [726-738]	0	3137.31	HexNAc(2)Hex(9)	0	726	2.78	147.4	24	24	0.00165144	5.06741e-05	0	0	0.15166	0.0126582	0.0125969	0.0139186	High
High	[K].LDNYSTQELGK.[T]	1xHexNAc(4)Hex(5)Fuc(1) [N3]	1	P21589	P21589 [331-341]	0	3036.26	HexNAc(4)Hex(5)Fuc(1)	0	331	2.75	202.9	30.9	30.9	0.00177843	5.70326e-05	0	0	0.16115	0.0154143	0.0153994	0.0170213	High
High	[R].GSSQPNLSTSHSEQEYGK.[A]	1xHexNAc(2)Hex(6) [N6]	1	O95208	O95208 [171-188]	0	3314.34	HexNAc(2)Hex(6)	0	171	2.7	57	28	28	0.00199207	6.90573e-05	0	0	0.17665	0.0172084	0.0171756	0.0190275	High
High	[R].LVQLFPNDTSLK.[N]	1xHexNAc(2)Hex(3)Fuc(1) [N7]	1	Q12797	Q12797 [446-457]	0	2413.14	HexNAc(2)Hex(3)Fuc(1)	0	446	2.67	33.5	33.5	33.5	0.00214183	7.10295e-05	0	0	0.187184	0.0172084	0.0171429	0.0189873	High
High	[R].LNITQEGPK.[D]	1xHexNAc(2)Hex(6) [N2]	1	Q5NDL2	Q5NDL2 [353-361]	0	2378.02	HexNAc(2)Hex(6)	0	353	2.65	192.8	13.2	13.2	0.00222236	7.51156e-05	0	0	0.192739	0.0172084	0.0170778	0.0189076	High
High	[R].GHTLTLNFTR.[N]	1xHexNAc(3)Hex(6)NeuAc(1) [N7]	1	P11279	P11279 [97-106]	0	3032.27	HexNAc(3)Hex(6)NeuAc(1)	0	97	2.65	184.2	8	8	0.00222236	7.91862e-05	0	0	0.192739	0.0180266	0.0179924	0.019937	High
High	[K].SLTTSLHNK.[T]	1xHexNAc(2)Hex(6) [N8]	1	Q92673	Q92673 [1887-1895]	0	2379.02	HexNAc(2)Hex(6)	0	1887	2.65	167	22.3	22.3	0.00222236	7.30745e-05	0	0	0.192739	0.0172084	0.0171103	0.0189474	High
High	[R].NNVITLNITGK.[A]	1xHexNAc(2)Hex(7) [N7]	2	P16278	P16278 [458-468]	0	2727.21	HexNAc(2)Hex(7)	0	458	2.64	63.6	47.9	47.9	0.00226835	8.12593e-05	0	0	0.195885	0.0180266	0.0179584	0.0198953	High
High	[K].QNNGAFNETLFR.[N]	1xHexNAc(6)Hex(4) [N7]	1	P02786	P02786 [721-732]	0	3277.36	HexNAc(6)Hex(4)	0	721	2.64	176.4	60.7	60.7	0.00230693	8.33649e-05	0	0	0.198506	0.0180266	0.0179415	0.0198745	High
High	[K].AEFNITLIHPK.[D]	1xHexNAc(2)Hex(8) [N4]	1	P15144	P15144 [231-241]	0	2985.3	HexNAc(2)Hex(8)	0	231	2.6	150.3	30.5	30.5	0.00253155	8.79885e-05	0	0	0.213437	0.019774	0.0197368	0.0218522	High
High	[K].MNFTGGDTCHK.[V]	1xOxidation [M1]; 1xCarbamidomethyl [C9]; 1xHexNAc(2)Hex(10) [N2]	1	P11717	P11717 [1311-1321]	0	3310.2	HexNAc(2)Hex(10)	0	1311	2.6	120.8	29.6	29.6	0.00253155	8.56789e-05	0	0	0.213437	0.019774	0.0197554	0.021875	High
High	[K].LIDNNKTEK.[E]	1xHexNAc(2)Hex(4) [N5]	2	P07602	P07602 [328-336]	1	2128.95	HexNAc(2)Hex(4)	0	328	2.58	194.2	51	51	0.00263203	9.27734e-05	0	0	0.21994	0.019774	0.0196629	0.0217617	High
High	[R].TVNVSVPK.[K]	1xHexNAc(2)Hex(3)Fuc(1) [N3]	1	Q96KA5	Q96KA5 [89-96]	0	1881.87	HexNAc(2)Hex(3)Fuc(1)	0	89	2.57	218.8	73.1	73.1	0.00271038	9.76902e-05	0	0	0.224939	0.019774	0.0195896	0.0216718	High
High	[R].MDPPCTNTTAASTYLNNPYVR.[K]	1xDeamidated [N16]; 1xOxidation [M1]; 1xCarbamidomethyl [C5]; 1xHexNAc(2)Hex(5) [N7]	1	P10619	P10619 [327-347]	0	3619.48	HexNAc(2)Hex(5)	0	327	2.51	171.5	85.2	39.7	0.00311757	0.000106052	0	0	0.249936	0.0212963	0.0212569	0.0235174	High
High	[K].NITIVTGAPR.[H]	1xHexNAc(2)Hex(10) [N1]	1	P26006	P26006 [265-274]	0	3068.29	HexNAc(2)Hex(10)	0	265	2.5	162.7	41.8	41.8	0.00319522	0.000111788	0	0	0.254524	0.0212963	0.0212177	0.0234934	High
High	[K].YSVANDTGFVDIPK.[Q]	1xHexNAc(2)Hex(5) [N5]	1	P07711	P07711 [217-230]	0	2742.18	HexNAc(2)Hex(5)	0	217	2.47	182.1	65.7	65.7	0.00339564	0.000126746	0	0	0.0111182	0.000982235	0	0	High
High	[R].LLNINPNK.[T]	1xHexNAc(2)Hex(3) [N7]	1	P11279	P11279 [255-262]	0	1817.86	HexNAc(2)Hex(3)	0	255	2.46	129	40	40	0.00343574	0.000139034	0	0	0.268394	0.0220386	0.0219579	0.0243408	High
High	[R].LLNINPNK.[T]	1xHexNAc(4)Hex(5)Fuc(1)NeuAc(1) [N7]	1	P11279	P11279 [255-262]	0	2985.28	HexNAc(4)Hex(5)Fuc(1)NeuAc(1)	0	255	2.46	120.3	44.7	44.7	0.00343574	0.00013597	0	0	0.268394	0.0220386	0.021978	0.0243655	High
High	[K].ANFSIK.[I]	1xHexNAc(2)Hex(7) [N2]	1	Q6P179	Q6P179 [218-223]	0	2219.91	HexNAc(2)Hex(7)	0	218	2.46	125.3	36.8	36.8	0.00343574	0.000132901	0	0	0.268394	0.0220386	0.0220183	0.0244151	High
High	[R].NTTIPTK.[Q]	1xHexNAc(5)Hex(6)NeuAc(1) [N1]	1	P11142	P11142 [417-423]	0	3053.24	HexNAc(5)Hex(6)NeuAc(1)	0	417	2.46	210.4	8.1	8.1	0.00343849	0.000142095	0	0	0.268549	0.0220386	0.0219178	0.0242915	High
High	[R].NLSAPVTLNLR.[D]	1xHexNAc(2)Hex(6) [N1]	1	O00754	O00754 [930-940]	0	2576.17	HexNAc(2)Hex(6)	0	930	2.46	166.7	55.6	55.6	0.00350008	0.000154473	0	0	0.272019	0.0228102	0.0227066	0.0251509	High
High	[R].TSIPTINMENK.[T]	1xOxidation [M8]; 1xHexNAc(2)Hex(5) [N10]	1	P26006	P26006 [960-970]	0	2480.05	HexNAc(2)Hex(5)	0	960	2.46	134.1	41.8	41.8	0.00350008	0.000151378	0	0	0.272019	0.0228102	0.0227273	0.0251762	High
High	[R].LVQLFPNDTSLK.[N]	1xHexNAc(2)Hex(7) [N7]	1	Q12797	Q12797 [446-457]	0	2915.29	HexNAc(2)Hex(7)	0	446	2.46	139.3	40.7	40.7	0.00350008	0.000157562	0	0	0.272019	0.0228102	0.022686	0.0251256	High
High	[K].GSLSYLNVTR.[K]	1xHexNAc(3)Hex(4)Fuc(1)NeuAc(1) [N7]	1	P07339	P07339 [257-266]	0	2804.2	HexNAc(3)Hex(4)Fuc(1)NeuAc(1)	0	257	2.44	155.8	12.3	12.3	0.00365333	0.000167163	0	0	0.280512	0.0244123	0.0243682	0.026973	High
High	[R].MSVINFECNK.[T]	1xOxidation [M1]; 1xCarbamidomethyl [C8]; 1xHexNAc(5)Hex(6)Fuc(1)NeuAc(1) [N9]	1	P11717	P11717 [427-436]	0	3682.43	HexNAc(5)Hex(6)Fuc(1)NeuAc(1)	0	427	2.44	124.4	13.2	13.2	0.00365333	0.00016395	0	0	0.280512	0.0244123	0.0243902	0.027	High
High	[R].GYYNQSEAGSHTVQR.[M]	1xHexNAc(2)Hex(5) [N4]	1	P01892	P01892 [107-121]	0	2913.19	HexNAc(2)Hex(5)	0	107	2.42	212.7	0.8	0.8	0.00383219	0.000173897	0	0	0.290183	0.025248	0.0252025	0.0278884	High
High	[K].TAVNCSSDFDACLITK.[A]	2xCarbamidomethyl [C5; C12]; 1xHexNAc(6)Hex(7) [N4]	1	P13987	P13987 [40-55]	0	4154.66	HexNAc(6)Hex(7)	1	40	2.38	133.7	57.9	57.9	0.0041387	0.000177538	0	0	0.306057	0.0270027	0.0269542	0.0298211	High
High	[R].ELAVPDGYTNR.[T]	1xHexNAc(5)Hex(6)Fuc(1)NeuAc(2) [N10]	1	P26006	P26006 [77-87]	0	3950.57	HexNAc(5)Hex(6)Fuc(1)NeuAc(2)	0	77	2.36	166	6.8	6.8	0.00434246	0.000181359	0	0	0.316227	0.0287253	0.0286995	0.031746	High
High	[R].NVTHHVSVTK.[Q]	1xHexNAc(2)Hex(1) [N1]	1	O94901	O94901 [588-597]	0	1689.82	HexNAc(2)Hex(1)	0	588	2.32	185.9	74.2	74.2	0.0047738	0.000917431	0.000915751	0.00108225	0.336816	0.0287253	0.028597	0.0316206	High
High	[R].NISFMVK.[R]	1xHexNAc(2)Hex(8) [N1]; 1xOxidation [M5]	1	O14672	O14672 [267-273]	0	2557.03	HexNAc(2)Hex(8)	0	267	2.31	184.1	28.1	28.1	0.00491434	0.000917431	0.000913242	0.00107875	0.343262	0.0287253	0.028394	0.0313725	High
High	[K].LIDNNK.[T]	1xHexNAc(2)Hex(5)Fuc(1) [N5]	1	P07602	P07602 [328-333]	0	2078.87	HexNAc(2)Hex(5)Fuc(1)	0	328	2.31	171.9	7.4	7.4	0.00491434	0.000917431	0.000914913	0.00108108	0.343262	0.0287253	0.0285714	0.0315893	High
High	[K].NISQDLEK.[Q]	1xHexNAc(2)Hex(5) [N1]	1	P11047	P11047 [1241-1248]	0	2162.91	HexNAc(2)Hex(5)	0	1241	2.31	174.5	27.4	27.4	0.00491434	0.000917431	0.000914077	0.00107991	0.343262	0.0287253	0.0284192	0.0314033	High
High	[R].LLNINPNK.[T]	1xHexNAc(3)Hex(4)NeuAc(1) [N7]	1	P11279	P11279 [255-262]	0	2474.09	HexNAc(3)Hex(4)NeuAc(1)	0	255	2.29	69.8	41.3	41.3	0.0050826	0.000917431	0.000910747	0.00107759	0.350819	0.0301418	0.0300619	0.0332356	High
High	[K].HLLENSTASVSEAER.[K]	1xHexNAc(2)Hex(7) [N5]	1	P42892	P42892 [162-176]	0	3183.33	HexNAc(2)Hex(7)	0	162	2.28	136.9	25.2	25.2	0.00527221	0.000917431	0.000909091	0.00107643	0.0130292	0.00114025	0.00112994	0.00124378	High
High	[R].FVHVNTSAVLK.[L]	1xHexNAc(2)Hex(9) [N5]	1	Q9Y6A1	Q9Y6A1 [467-477]	0	3079.32	HexNAc(2)Hex(9)	0	467	2.27	151.4	40.3	40.3	0.00542675	0.000917431	0.000907441	0.00107411	0.0134111	0.00114025	0.00112486	0.00123762	High
High	[R].VFGSQNLTTVK.[L]	1xHexNAc(3)Hex(3) [N6]	2	Q9Y4L1	Q9Y4L1 [510-520]	0	2289.05	HexNAc(3)Hex(3)	0	510	2.21	74.9	45.5	45.5	0.00615772	0.00271985	0.00271248	0.00321199	0.395334	0.0351185	0.0350877	0.0388349	High
High	[R].QVVENMTR.[A]	1xHexNAc(2)Hex(3) [N5]	1	P10253	P10253 [386-393]	0	1868.81	HexNAc(2)Hex(3)	0	386	2.2	211.7	59	59	0.0062712	0.00271985	0.00271003	0.00320856	0.399684	0.0351185	0.035057	0.0387973	High
High	[K].GGNLPPVSPNDSGAK.[I]	1xHexNAc(4)Hex(5)Fuc(1)NeuAc(1) [N10]	1	Q9UK61	Q9UK61 [1096-1110]	0	3469.44	HexNAc(4)Hex(5)Fuc(1)NeuAc(1)	0	1096	2.18	146.7	39.3	39.3	0.00658587	0.00271985	0.00270758	0.00320513	0.0162752	0.00222469	0.00221976	0.00244499	High
High	[K].MCLNR.[T]	1xHexNAc(2)Hex(3)Fuc(1) [N4]; 1xOxidation [M1]; 1xCarbamidomethyl [C2]	1	Q13510	Q13510 [339-343]	0	1747.69	HexNAc(2)Hex(3)Fuc(1)	0	339	2.17	68.7	38.7	38.7	0.00682572	0.00271985	0.0027027	0.00320171	0.420084	0.0359019	0.0358705	0.0396902	High
High	[R].NNSNNFDLNR.[N]	1xHexNAc(2)Hex(7) [N1]	1	O75976	O75976 [626-635]	0	2748.07	HexNAc(2)Hex(7)	0	626	2.16	189.3	55.7	55.7	0.00698831	0.00271985	0.00270027	0.00319829	0.0172695	0.00222469	0.00219298	0.00241546	High
High	[K].YIHQNYTK.[A]	1xHexNAc(2)Hex(9) [N5]	1	Q02809	Q02809 [534-541]	0	2931.17	HexNAc(2)Hex(9)	0	534	2.12	157.8	65.1	65.1	0.00764617	0.00271985	0.002693	0.00319149	0.018895	0.0043431	0.00430107	0.00474496	High
High	[K].NGSLFAFR.[G]	1xHexNAc(3)Hex(6)NeuAc(1) [N1]	1	P04004	P04004 [169-176]	0	2784.12	HexNAc(3)Hex(6)NeuAc(1)	0	169	2.08	189.3	38.3	38.3	0.00830473	0.00359066	0.00358423	0.00424628	0.0164815	0.00222469	0.00220507	0.00243013	High
High	[K].HMSLALNR.[T]	1xOxidation [M2]; 1xHexNAc(2)Hex(3) [N7]	1	P06280	P06280 [186-193]	0	1849.81	HexNAc(2)Hex(3)	0	186	2.08	171.7	49.2	49.2	0.00840597	0.00359066	0.00357782	0.00424178	0.471389	0.0417029	0.0416667	0.0461095	High
High	[R].TNINFSLQGK.[D]	1xHexNAc(2)Hex(3)Fuc(1) [N4]	1	Q9NS85	Q9NS85 [299-308]	0	2159.97	HexNAc(2)Hex(3)Fuc(1)	0	299	2.06	239.1	22.3	22.3	0.00870239	0.00359066	0.00357462	0.00423729	0.0172706	0.00222469	0.00219058	0.00241254	High
High	[R].LLNINPNK.[T]	1xHexNAc(3)Hex(4)Fuc(1)NeuAc(1) [N7]	1	P11279	P11279 [255-262]	0	2620.15	HexNAc(3)Hex(4)Fuc(1)NeuAc(1)	0	255	2.05	168.3	50.5	50.5	0.00882302	0.00359066	0.00356824	0.00422833	0.483474	0.0425347	0.0424242	0.0469349	High
High	[R].EERPLNASALK.[L]	1xHexNAc(2)Hex(8) [N6]	1	O14657	O14657 [59-69]	0	2930.25	HexNAc(2)Hex(8)	0	59	2.05	203.6	82.9	82.9	0.00885609	0.00359066	0.00356506	0.00422386	0.0175756	0.00222469	0.00218341	0.00240674	High
High	[R].VTPACNTSLPAQR.[W]	1xHexNAc(2)Hex(7) [N6]; 1xCarbamidomethyl [C5]	1	Q9UBG0	Q9UBG0 [64-76]	0	2955.24	HexNAc(2)Hex(7)	0	64	2.04	195.5	63.2	63.2	0.00912336	0.00359066	0.00355556	0.00421941	0.0225446	0.0052356	0.00523012	0.00577367	High
High	[K].NATLAEQAK.[L]	1xHexNAc(7)Hex(3)Fuc(1) [N1]	1	Q9Y4L1	Q9Y4L1 [869-877]	0	2999.27	HexNAc(7)Hex(3)Fuc(1)	0	869	2.03	179.9	47.4	47.4	0.00939588	0.00359066	0.0035524	0.00421496	0.499216	0.0425347	0.042205	0.0466667	High
High	[R].FVLQNASR.[A]	1xHexNAc(2)Hex(8) [N5]	2	Q9NXH8	Q9NXH8 [310-317]	0	2637.09	HexNAc(2)Hex(8)	0	310	2.02	199.4	56.9	56.9	0.00952097	0.00359066	0.00354925	0.00421053	0.018895	0.0043431	0.00429185	0.00473373	High
High	[K].NASNLVK.[A]	1xHexNAc(2)Hex(8) [N1]	1	P61812	P61812 [140-146]	0	2448	HexNAc(2)Hex(8)	0	140	2.02	166.4	36.7	36.7	0.00952097	0.00359066	0.0035461	0.0042061	0.018895	0.0043431	0.0042735	0.00471698	High
High	[R].ALGFENATQALGR.[A]	1xHexNAc(2)Hex(6) [N6]	1	Q08380	Q08380 [64-76]	0	2726.18	HexNAc(2)Hex(6)	0	64	2.01	139.1	1.9	1.9	0.00983667	0.00359066	0.00353669	0.00419287	0.510702	0.0437393	0.0437018	0.0482954	High
High	[K].TLSPTGNISSAPK.[D]	1xHexNAc(2)Hex(7) [N7]	1	O94901	O94901 [726-738]	0	2813.21	HexNAc(2)Hex(7)	0	726	2.01	159.2	22.8	22.8	0.00983667	0.00359066	0.00353982	0.00419727	0.510702	0.0425347	0.0420601	0.0464896	High
High	[R].VTPACNTSLPAQR.[W]	1xCarbamidomethyl [C5]; 1xHexNAc(4)Hex(5)Fuc(1)NeuAc(1) [N6]	1	Q9UBG0	Q9UBG0 [64-76]	0	3474.45	HexNAc(4)Hex(5)Fuc(1)NeuAc(1)	0	64	2.01	144.9	28.3	28.3	0.00985532	0.00359066	0.00353357	0.00418848	0.0243529	0.0052356	0.00517598	0.00571429	High
High	[K].GGNLPPVSPNDSGAK.[I]	1xHexNAc(4)Hex(5)Fuc(1) [N10]	1	Q9UK61	Q9UK61 [1096-1110]	0	3178.34	HexNAc(4)Hex(5)Fuc(1)	0	1096	1.98	160.9	16.3	16.3	0.0105216	0.00359066	0.00352734	0.0041841	0.025999	0.00621118	0.00614125	0.00677966	High
High	[K].TPMTNSSIQFLDNAFR.[K]	1xHexNAc(2)Hex(7) [N5]; 1xOxidation [M3]	1	P15586	P15586 [275-290]	0	3398.41	HexNAc(2)Hex(7)	0	275	1.95	104.5	27.3	27.3	0.0112349	0.00359066	0.00352113	0.00417973	0.543943	0.0478224	0.0477408	0.0527804	High
High	[R].NVTILR.[G]	1xHexNAc(2)Hex(6) [N1]	1	Q6AZY7	Q6AZY7 [451-456]	0	2093.92	HexNAc(2)Hex(6)	0	451	1.94	180.6	40.7	40.7	0.0113958	0.00359066	0.00351803	0.00417536	0.018895	0.0043431	0.00428265	0.00472813	High
High	[R].DAGVVCTNETR.[S]	1xHexNAc(2)Hex(9) [N8]; 1xCarbamidomethyl [C6]	1	Q08380	Q08380 [118-128]	0	3086.19	HexNAc(2)Hex(9)	0	118	1.92	90.9	54	54	0.0120208	0.00359066	0.00351494	0.00417101	0.560752	0.0485933	0.048552	0.0536723	High
High	[K].SLTTSLHNK.[T]	1xHexNAc(2)Hex(9) [N8]	1	Q92673	Q92673 [1887-1895]	0	2865.18	HexNAc(2)Hex(9)	0	1887	1.89	125.2	4.9	4.9	0.0128237	0.00359066	0.00351185	0.00416667	0.576712	0.0501701	0.0501274	0.0553991	High
High	[R].EAINITLDHK.[C]	1xHexNAc(2)Hex(9) [N4]	1	O00469	O00469 [206-215]	0	3018.26	HexNAc(2)Hex(9)	0	206	1.89	118.4	10.9	10.9	0.0128237	0.00359066	0.00350877	0.00416233	0.576712	0.0501701	0.05	0.0552434	High
High	[K].NLTLR.[C]	1xHexNAc(2)Hex(5) [N1]	1	P05362	P05362 [130-134]	0	1832.8	HexNAc(2)Hex(5)	0	130	1.88	215.4	58.2	58.2	0.0131193	0.00359066	0.0035057	0.004158	0.582302	0.0501701	0.0499154	0.0551918	High
High	[R].LNSSTIK.[Y]	1xHexNAc(5)Hex(6) [N2]	1	P13473	P13473 [274-280]	0	2750.15	HexNAc(5)Hex(6)	0	274	1.88	152.2	10.1	10.1	0.0131492	0.00359066	0.00350263	0.00415369	0.58286	0.0501701	0.0498311	0.0550887	High
High	[R].KNLTLMATTSQLPK.[L]	1xHexNAc(2)Hex(8) [N2]; 1xOxidation [M6]	1	P11117	P11117 [266-279]	1	3264.44	HexNAc(2)Hex(8)	0	266	1.88	167.2	5.1	5.1	0.0132203	0.00359066	0.00349956	0.00414938	0.0188234	0.0043431	0.0043057	0.00475059	High
High	[K].NNTTFLECAPK.[S]	1xHexNAc(2)Hex(8) [N1]; 1xCarbamidomethyl [C8]	1	Q99985	Q99985 [585-595]	0	2997.19	HexNAc(2)Hex(8)	0	585	1.85	119.3	84.8	23.6	0.0141394	0.00437445	0.00436681	0.00517598	0.0201319	0.0043431	0.00423729	0.0046729	High
High	[R].AACAVKPQEVQMVNGTITNPINGK.[S]	1xOxidation [M12]; 1xCarbamidomethyl [C3]; 1xHexNAc(4)Hex(5)Fuc(1)NeuAc(2) [N14]	1	P11717	P11717 [2123-2146]	0	4907.12	HexNAc(4)Hex(5)Fuc(1)NeuAc(2)	1	2123	1.85	90.9	37	6.9	0.0141661	0.00437445	0.004363	0.00517063	0.600989	0.0536913	0.0536463	0.0592593	High
High	[RK].NITEGLK.[ED]	1xHexNAc(2)Hex(3) [N1]	2	Q86UQ4	Q86UQ4 [1764-1770]	0	1666.75	HexNAc(2)Hex(3)	0	1764	1.81	236.2	21.6	21.6	0.0153855	0.00437445	0.0043592	0.00516529	0.021906	0.0043431	0.00418848	0.00462428	High
High	[R].LESPYYGNNTLGGPSIR.[S]	1xHexNAc(6)Hex(3)Fuc(1) [N8]	1	Q96L42	Q96L42 [402-418]	0	3688.6	HexNAc(6)Hex(3)Fuc(1)	0	402	1.78	80.1	33.9	33.9	0.0164587	0.00523104	0.00522648	0.00619195	0.023434	0.0052356	0.00521376	0.00575374	High
High	[K].LEDLEDNSTPEPK.[E]	1xHexNAc(2)Hex(7) [N7]	1	Q9HC44	Q9HC44 [346-358]	0	3027.22	HexNAc(2)Hex(7)	0	346	1.77	131.5	14.5	14.5	0.0171041	0.00523104	0.00521739	0.00618557	0.0243529	0.0052356	0.00518135	0.00572082	High
High	[K].DGTYNWMSWLLVNVSAHR.[D]	1xHexNAc(3)Hex(3)Fuc(1) [N13]	1	P78324	P78324 [307-324]	0	3390.48	HexNAc(3)Hex(3)Fuc(1)	0	307	1.76	44.3	5.7	5.7	0.0175496	0.00608696	0.00608167	0.00720906	0.0249872	0.00621118	0.00618557	0.00683371	High
High	[K].DINESDEVEVYSR.[A]	1xHexNAc(2)Hex(8) [N3]	1	Q06787	Q06787 [58-70]	0	3257.27	HexNAc(2)Hex(8)	0	58	1.74	219.2	33.5	33.5	0.0181825	0.00608696	0.00607639	0.00720165	0.0258883	0.00621118	0.00614754	0.00678733	High
High	[R].IANFTEHQR.[I]	1xHexNAc(5)Hex(6)NeuAc(2) [N3]	1	Q9P2J8	Q9P2J8 [512-520]	0	3685.46	HexNAc(5)Hex(6)NeuAc(2)	0	512	1.74	147.7	19.7	19.7	0.0183346	0.00608696	0.00607112	0.00719424	0.0261048	0.00621118	0.0061287	0.00676437	High
High	[RH].DEIENHSLSQEGNLVLEK.[S]	1xHexNAc(2)Hex(3) [N5]	1	Q8N3K9	Q8N3K9 [2644-2661]; [2732-2749]	0	2946.32	HexNAc(2)Hex(3)	0	2644	1.73	21.9	10.9	10.9	0.0186543	0.00608696	0.00606586	0.00718686	0.0265599	0.00621118	0.00610998	0.00674157	High
High	[K].CIPVMEAQEYIANVTSSSSAK.[F]	1xHexNAc(2)Hex(6) [N13]; 1xOxidation [M5]; 1xCarbamidomethyl [C1]	1	Q8NC56	Q8NC56 [299-319]	0	3679.55	HexNAc(2)Hex(6)	0	299	1.72	49.5	36.4	36.4	0.0189847	0.00693241	0.00692041	0.00819672	0.0270304	0.00712831	0.00709939	0.00782998	High
High	[K].IFIFNQTGIEAK.[K]	1xHexNAc(2)Hex(8) [N5]	1	Q96J42	Q96J42 [289-300]	0	3083.33	HexNAc(2)Hex(8)	0	289	1.71	97.1	69.1	69.1	0.0192819	0.00778547	0.00777874	0.00921187	0.0274534	0.00806452	0.00804829	0.00888889	High
High	[R].AGPNGTLFVADAYK.[G]	1xHexNAc(1) [N4]	1	Q9HDC9	Q9HDC9 [157-170]	0	1626.8	HexNAc(1)	0	157	1.63	7.6	7.6	7.6	0.0235999	0.00864304	0.00862069	0.0102041	0.716449	0.0615129	0.0614618	0.0678277	High
High	[R].PGPLSTANHTALR.[G]	1xHexNAc(2)Hex(6) [N8]	1	O60512	O60512 [378-390]	0	2713.19	HexNAc(2)Hex(6)	0	378	1.58	200.1	40.2	40.2	0.0265263	0.00864304	0.00859845	0.0101937	0.0377575	0.00903614	0.00902708	0.00997783	High
High	[K].PFNLSQGK.[K]	1xHexNAc(4)Hex(6) [N3]	1	Q9ULW0	Q9ULW0 [306-313]	0	2675.11	HexNAc(4)Hex(6)	0	306	1.57	279.9	52.1	52.1	0.0269507	0.00864304	0.00859106	0.0101833	0.0383612	0.00903614	0.00901804	0.00996678	High
High	[K].YIHQNYTK.[A]	1xHexNAc(2)Hex(8) [N5]	1	Q02809	Q02809 [534-541]	0	2769.11	HexNAc(2)Hex(8)	0	534	1.51	228.8	76.3	76.3	0.031228	0.00864304	0.00856164	0.0101626	0.0769576	0.00903614	0.00894632	0.00989011	High
High	[R].FVHVNTSAVLK.[L]	1xHexNAc(6)Hex(3) [N5]	1	Q9Y6A1	Q9Y6A1 [467-477]	0	2919.32	HexNAc(6)Hex(3)	0	467	1.5	170.7	49.7	49.7	0.0318359	0.00864304	0.00855432	0.0101523	0.0784521	0.00903614	0.00893744	0.00987925	High
High	[R].NNTIVNELVR.[V]	1xHexNAc(2)Hex(3) [N1]	1	P10253	P10253 [882-891]	0	2063.96	HexNAc(2)Hex(3)	0	882	1.46	72.4	25.5	25.5	0.0350632	0.00864304	0.00853971	0.0101317	0.791255	0.0714286	0.0713115	0.0786618	High
High	[K].ILGDKVNNTAVIEK.[Q]	1xHexNAc(2)Hex(8) [N7]	1	Q9H330	Q9H330 [545-558]	1	3216.44	HexNAc(2)Hex(8)	0	545	1.45	215.3	45.8	45.8	0.0353002	0.00864304	0.00853242	0.0101215	0.0502359	0.00903614	0.009	0.00994475	High
High	[RK].NYTADYDK.[TA]	1xHexNAc(2)Hex(6) [N1]	1	O75477	O75477 [106-113]	0	2367.9	HexNAc(2)Hex(6)	0	106	1.39	151	97.8	97.8	0.0403253	0.00864304	0.00852515	0.0101112	0.0573818	0.00903614	0.00899101	0.00993377	High
High	[R].DNFGGGNTAWEEENLSK.[Y]	1xHexNAc(2)Hex(3)Fuc(1) [N14]	1	Q96HD1	Q96HD1 [66-82]	0	2906.18	HexNAc(2)Hex(3)Fuc(1)	0	66	1.34	105.2	40.9	40.9	0.0455956	0.00864304	0.00851789	0.010101	0.064876	0.00903614	0.00895522	0.00990099	High
High	[R].MDPPCTNTTAASTYLNNPYVR.[K]	1xHexNAc(2)Hex(6) [N7]; 1xDeamidated [N16]; 1xCarbamidomethyl [C5]	1	P10619	P10619 [327-347]	0	3765.54	HexNAc(2)Hex(6)	0	327	1.27	78	46.9	17.3	0.0536871	0.00864304	0.00851064	0.0100908	0.855167	0.0767347	0.0766721	0.0845324	High
High	[R].FANEYPNITR.[L]	1xHexNAc(4)Hex(5)Fuc(1)NeuAc(2) [N7]	1	O75976	O75976 [516-525]	0	3575.43	HexNAc(4)Hex(5)Fuc(1)NeuAc(2)	0	516	1.27	142.6	28.4	28.4	0.053718	0.00864304	0.0085034	0.0100806	0.132196	0.0117647	0.0117187	0.012931	High
High	[K].CNMINGTDGDSFHPLITK.[D]	1xHexNAc(2)Hex(9) [N5]; 1xDeamidated [N2]; 1xOxidation [M3]; 1xCarbamidomethyl [C1]	1	Q14108	Q14108 [245-262]	0	3901.54	HexNAc(2)Hex(9)	0	245	1.24	87	8.3	8.3	0.0575772	0.00864304	0.00848176	0.0100604	0.864085	0.0876206	0.0875502	0.0956599	High
High	[R].VQPFNVTQGK.[Y]	1xHexNAc(3)Hex(5)NeuAc(1) [N5]	1	P13473	P13473 [352-361]	0	2828.2	HexNAc(3)Hex(5)NeuAc(1)	0	352	1.24	82.9	22.5	22.5	0.0577054	0.00864304	0.0084674	0.0100402	0.864362	0.0882117	0.0880704	0.0962048	High
High	[K].LNYTLSQGHR.[V]	1xHexNAc(4)Hex(5) [N2]	1	P15144	P15144 [127-136]	0	2811.19	HexNAc(4)Hex(5)	0	127	1.24	148.3	7.4	7.4	0.0577054	0.00864304	0.00847458	0.0100503	0.864362	0.0876206	0.0874799	0.0955752	High
High	[R].NVSTNVFFK.[Q]	1xHexNAc(2)Hex(9) [N1]	1	Q6YHK3	Q6YHK3 [337-345]	0	2920.19	HexNAc(2)Hex(9)	0	337	1.22	106	37.4	37.4	0.0608652	0.00864304	0.00845308	0.01002	0.0865857	0.00903614	0.00891972	0.00985761	High
High	[K].LNITCESSK.[K]	1xHexNAc(2)Hex(8) [N2]; 1xCarbamidomethyl [C5]	2	Q4KMQ2	Q4KMQ2 [360-368]	0	2754.09	HexNAc(2)Hex(8)	0	360	1.22	125.9	34.5	34.5	0.0608652	0.00864304	0.00846024	0.0100301	0.0865857	0.00903614	0.00892857	0.00986842	High
High	[K].MAAALNATGR.[P]	1xHexNAc(2)Hex(6) [N6]; 1xOxidation [M1]	1	P17050	P17050 [172-181]	0	2369.97	HexNAc(2)Hex(6)	0	172	1.2	175.8	19.5	19.5	0.0626117	0.00864304	0.00843882	0.01	0.874203	0.0916335	0.0914877	0.0999123	High
High	[R].EAGNHTSGAGLVQINK.[S]	1xDeamidated [Q13]; 1xHexNAc(6)Hex(3) [N4]	1	P20645	P20645 [80-95]	0	3301.43	HexNAc(6)Hex(3)	0	80	1.18	139	24.5	17.8	0.0665767	0.00864304	0.00841751	0.00999001	0.881232	0.0957278	0.0956522	0.104621	High
High	[R].TNSTFVQALVEHVK.[E]	1xDeamidated [Q7]; 1xHexNAc(1)Fuc(1) [N2]	1	P07602	P07602 [214-227]	0	1922.96	HexNAc(1)Fuc(1)	0	214	1.14	149.8	149.8	149.8	0.0721839	0.00864304	0.00841043	0.00998004	0.890011	0.0959874	0.0956863	0.104581	High
High	[K].GIVENMGINANNMSDFIMK.[V]	1xHexNAc(2)Hex(1) [N12]	1	Q9NYU1	Q9NYU1 [909-927]	0	2666.19	HexNAc(2)Hex(1)	0	909	1.14	12.3	1.6	1.6	0.0731248	0.00864304	0.00840336	0.00997009	0.104012	0.00903614	0.0088845	0.00981461	High
High	[K].FNFSK.[P]	1xHexNAc(2)Hex(8) [N2]	1	Q09666	Q09666 [5717-5721]	0	2344.91	HexNAc(2)Hex(8)	0	5717	1.12	143.6	11.4	11.4	0.0760823	0.00864304	0.0083963	0.00996016	0.895439	0.0980392	0.0978091	0.106034	High
High	[K].MAAALNATGR.[P]	1xHexNAc(2)Hex(7) [N6]	1	P17050	P17050 [172-181]	0	2516.03	HexNAc(2)Hex(7)	0	172	1.11	125.5	16.4	16.4	0.076837	0.00864304	0.00838926	0.00995025	0.896433	0.0992963	0.0992187	0.107573	High
High	[K].ENQNHSYSLK.[S]	1xHexNAc(2)Hex(7) [N4]	1	P06756	P06756 [942-951]	0	2760.1	HexNAc(2)Hex(7)	0	942	1.08	131.8	16.1	16.1	0.0839817	0.00864304	0.00837521	0.00993049	0.905053	0.100703	0.100467	0.109013	High
High	[K].VASVININPNTTHSTGSCR.[S]	1xCarbamidomethyl [C18]; 1xHexNAc(5)Hex(6)Fuc(1) [N10]	1	P13473	P13473 [248-266]	0	4161.76	HexNAc(5)Hex(6)Fuc(1)	1	248	7.79	424.1	294	140.7	1.63174e-08	2.34578e-09	0	0	1.525e-06	2.13004e-07	0	0	High
High	[K].VASVININPNTTHSTGSCR.[S]	1xCarbamidomethyl [C18]; 1xHexNAc(5)Hex(6)Fuc(1)NeuAc(1) [N10]	1	P13473	P13473 [248-266]	0	4452.86	HexNAc(5)Hex(6)Fuc(1)NeuAc(1)	0	248	7.43	507.4	380.5	144.7	3.69606e-08	5.58773e-09	0	0	3.45428e-06	5.35302e-07	0	0	High
High	[R].IAPASNVSHTVVLRPLK.[A]	1xHexNAc(2)Hex(9) [N6]	1	P43308	P43308 [83-99]	0	3666.7	HexNAc(2)Hex(9)	0	83	7.37	514.8	411.4	411.4	4.28228e-08	7.63977e-09	0	0	4.00214e-06	7.372e-07	0	0	High
High	[R].TNSTFVQALVEHVK.[E]	1xHexNAc(2)Hex(6) [N2]	1	P07602	P07602 [214-227]	0	2951.31	HexNAc(2)Hex(6)	0	214	7.2	413	237.5	237.5	6.33186e-08	1.32075e-08	0	0	5.91764e-06	1.25162e-06	0	0	High
High	[R].EASIVGENETYPR.[A]	1xHexNAc(2)Hex(8) [N8]	1	Q9UBV2	Q9UBV2 [601-613]	0	3167.28	HexNAc(2)Hex(8)	0	601	7.09	455.8	308.5	308.5	8.18723e-08	1.69569e-08	0	0	7.65162e-06	1.61946e-06	0	0	High
High	[R].DHHGANFSCR.[T]	1xCarbamidomethyl [C9]; 1xHexNAc(5)Hex(6)Fuc(1)NeuAc(2) [N6]	1	P05362	P05362 [178-187]	0	3916.46	HexNAc(5)Hex(6)Fuc(1)NeuAc(2)	0	178	6.88	378.6	223.4	223.4	1.30366e-07	3.0813e-08	0	0	1.21837e-05	2.96577e-06	0	0	High
High	[K].ANTTQPGIVEGGQVLK.[C]	1xHexNAc(2)Hex(5) [N2]	1	P06756	P06756 [73-88]	0	2828.29	HexNAc(2)Hex(5)	0	73	6.83	366.5	249.5	249.5	1.47038e-07	3.60096e-08	0	0	1.37418e-05	3.46735e-06	0	0	High
High	[K].NNHTASILDR.[M]	1xHexNAc(2)Hex(7) [N2]	1	P08962	P08962 [129-138]	0	2681.1	HexNAc(2)Hex(7)	0	129	6.66	367.8	111.7	111.7	2.17221e-07	5.77597e-08	0	0	2.03009e-05	5.55643e-06	0	0	High
High	[K].ANTTQPGIVEGGQVLK.[C]	1xHexNAc(3)Hex(5) [N2]	1	P06756	P06756 [73-88]	0	3031.37	HexNAc(3)Hex(5)	0	73	6.64	353.3	163.4	163.4	2.27392e-07	6.26495e-08	0	0	2.12514e-05	6.02427e-06	0	0	High
High	[R].YYNQSEAGSHTLQR.[M]	1xHexNAc(4)Hex(5)Fuc(1)NeuAc(1) [N3]	1	P30485	P30485 [108-121]	0	3713.5	HexNAc(4)Hex(5)Fuc(1)NeuAc(1)	0	108	6.55	293.3	112.4	112.4	2.8036e-07	7.68533e-08	0	0	2.62015e-05	7.31537e-06	0	0	High
High	[R].NETHSICTACDESCK.[T]	3xCarbamidomethyl [C7; C10; C14]; 1xHexNAc(2)Hex(5) [N1]	1	Q6UXH1	Q6UXH1 [190-204]	0	3028.12	HexNAc(2)Hex(5)	0	190	6.52	303.3	271.4	271.4	2.9911e-07	8.39498e-08	0	0	2.79538e-05	7.92978e-06	0	0	High
High	[R].TVNVSVPK.[K]	1xHexNAc(2)Hex(5) [N3]	1	Q96KA5	Q96KA5 [89-96]	0	2059.92	HexNAc(2)Hex(5)	0	89	6.42	353.9	198.9	198.9	3.82827e-07	1.05382e-07	0	0	3.57774e-05	9.92373e-06	0	0	High
High	[K].NATLAEQAK.[L]	1xHexNAc(2)Hex(8) [N1]	2	Q9Y4L1	Q9Y4L1 [869-877]	0	2648.08	HexNAc(2)Hex(8)	0	869	6.41	271.8	120.8	120.8	3.87739e-07	1.07068e-07	0	0	3.62365e-05	1.00868e-05	0	0	High
High	[K].VASVININPNTTHSTGSCR.[S]	1xCarbamidomethyl [C18]; 1xHexNAc(3)Hex(5)Fuc(1) [N10]	1	P13473	P13473 [248-266]	0	3593.55	HexNAc(3)Hex(5)Fuc(1)	0	248	6.27	267.3	146.4	146.4	5.37181e-07	1.46331e-07	0	0	5.02022e-05	1.37056e-05	0	0	High
High	[K].VASVININPNTTHSTGSCR.[S]	1xCarbamidomethyl [C18]; 1xHexNAc(7)Hex(8) [N10]	1	P13473	P13473 [248-266]	0	4745.97	HexNAc(7)Hex(8)	0	248	6.15	428.9	336.7	78.5	7.02961e-07	1.77253e-07	0	0	6.56943e-05	1.65852e-05	0	0	High
High	[R].GVYELTHNNK.[T]	1xHexNAc(2)Hex(6) [N9]	2	Q7Z388	Q7Z388 [115-124]	0	2553.06	HexNAc(2)Hex(6)	0	115	6.09	277.8	78.8	78.8	8.0847e-07	1.97843e-07	0	0	7.55541e-05	1.85805e-05	0	0	High
High	[R].VQPFNVTQGK.[Y]	1xHexNAc(5)Hex(6) [N5]	1	P13473	P13473 [352-361]	0	3105.31	HexNAc(5)Hex(6)	0	352	6.06	294.9	129.2	129.2	8.63455e-07	2.15413e-07	0	0	8.06922e-05	2.02792e-05	0	0	High
High	[R].ELAVPDGYTNR.[T]	1xHexNAc(5)Hex(6)Fuc(1) [N10]	1	P26006	P26006 [77-87]	0	3368.38	HexNAc(5)Hex(6)Fuc(1)	0	77	6.01	314.2	140.4	140.4	9.79742e-07	2.49659e-07	0	0	9.15587e-05	2.35823e-05	0	0	High
High	[R].VQPFNVTQGK.[Y]	1xHexNAc(1) [N5]	1	P13473	P13473 [352-361]	0	1320.68	HexNAc(1)	0	352	5.98	404.2	198.5	198.5	1.05103e-06	2.59815e-07	0	0	9.82202e-05	2.45602e-05	0	0	High
High	[K].CHEGNGTFECGACR.[C]	3xCarbamidomethyl [C1; C10; C13]; 1xHexNAc(6)Hex(4) [N5]	1	P05556	P05556 [477-490]	0	3521.3	HexNAc(6)Hex(4)	0	477	5.96	350.6	259.3	259.3	1.08695e-06	2.72011e-07	0	0	0.000101577	2.57336e-05	0	0	High
High	[K].TNITLVCK.[P]	1xHexNAc(2)Hex(6) [N2]; 1xCarbamidomethyl [C7]	1	P11717	P11717 [580-587]	0	2326.99	HexNAc(2)Hex(6)	0	580	5.96	248.7	111.1	111.1	1.10741e-06	2.73808e-07	0	0	0.000103488	2.59064e-05	0	0	High
High	[R].EAGNHTSGAGLVQINK.[S]	1xHexNAc(4)Hex(5)Fuc(1) [N4]	1	P20645	P20645 [80-95]	0	3364.45	HexNAc(4)Hex(5)Fuc(1)	0	80	5.88	265.5	53.8	53.8	1.30987e-06	2.97223e-07	0	0	0.000122407	2.81573e-05	0	0	High
High	[R].LENITTGTYTIHAQK.[E]	1xHexNAc(2)Hex(8) [N3]	1	Q5JPE7	Q5JPE7 [367-381]	0	3392.46	HexNAc(2)Hex(8)	0	367	5.86	406.9	262.8	262.8	1.374e-06	3.0814e-07	0	0	0.0001284	2.94084e-05	0	0	High
High	[K].NLTFEGPLPEK.[I]	1xHexNAc(2)Fuc(1) [N1]	1	Q9HAT2	Q9HAT2 [401-411]	0	1796.87	HexNAc(2)Fuc(1)	0	401	5.61	306.4	212.1	212.1	2.46738e-06	4.84249e-07	0	0	0.000230557	4.79255e-05	0	0	High
High	[K].LNYTLSQGHR.[V]	1xHexNAc(6)Hex(3) [N2]	1	P15144	P15144 [127-136]	0	2893.25	HexNAc(6)Hex(3)	0	127	5.44	262.1	88.6	88.6	3.67181e-06	6.07183e-07	0	0	0.000343071	5.96243e-05	0	0	High
High	[R].TCSSNLTLTSGSK.[H]	1xCarbamidomethyl [C2]; 1xHexNAc(4)Hex(5)Fuc(1) [N5]	1	Q9H5V8	Q9H5V8 [382-394]	0	3124.29	HexNAc(4)Hex(5)Fuc(1)	0	382	5.41	266.1	44.1	44.1	3.91887e-06	6.40198e-07	0	0	0.000366149	6.27199e-05	0	0	High
High	[R].TNSTFVQALVEHVK.[E]	1xHexNAc(2)Hex(8) [N2]	1	P07602	P07602 [214-227]	0	3275.42	HexNAc(2)Hex(8)	0	214	5.28	276.5	96.9	96.9	5.19746e-06	7.75321e-07	0	0	0.000485565	7.64535e-05	0	0	High
High	[R].EASIVGENETYPR.[A]	1xHexNAc(2)Hex(6) [N8]	1	Q9UBV2	Q9UBV2 [601-613]	0	2843.17	HexNAc(2)Hex(6)	0	601	5.28	313.2	119.8	119.8	5.28628e-06	7.8284e-07	0	0	0.00049386	7.71538e-05	0	0	High
High	[R].GYYNQSEAGSHTVQR.[M]	1xHexNAc(2)Hex(8) [N4]	1	P01892	P01892 [107-121]	0	3399.35	HexNAc(2)Hex(8)	0	107	5.24	208.7	113.7	113.7	5.80862e-06	8.54093e-07	0	0	0.000542638	8.16069e-05	0	0	High
High	[R].GPGIKPNQTSK.[M]	1xHexNAc(2)Hex(7) [N7]	1	P15586	P15586 [356-366]	0	2667.15	HexNAc(2)Hex(7)	0	356	5.22	290.7	120.6	120.6	6.05314e-06	8.7906e-07	0	0	0.000565471	8.39573e-05	0	0	High
High	[R].NVTHHVSVTK.[Q]	1xHexNAc(2)Hex(4) [N1]	1	O94901	O94901 [588-597]	0	2175.98	HexNAc(2)Hex(4)	0	588	5.03	262.3	95.9	95.9	9.27772e-06	1.17968e-06	0	0	0.000866503	0.00163399	0.00156986	0.00171821	High
High	[K].GLNLTEDTYKPR.[I]	1xHexNAc(2)Hex(9) [N3]	1	Q08380	Q08380 [396-407]	0	3271.36	HexNAc(2)Hex(9)	0	396	4.97	255.6	87.4	87.4	1.06309e-05	1.22172e-06	0	0	0.000992788	0.00163399	0.0015625	0.0017094	High
High	[R].TSIPTINMENK.[T]	1xHexNAc(2)Hex(6) [N10]; 1xOxidation [M8]	1	P26006	P26006 [960-970]	0	2642.1	HexNAc(2)Hex(6)	0	960	4.97	293.9	115	115	1.07224e-05	1.23647e-06	0	0	0.00100133	0.00163399	0.00156006	0.00170648	High
High	[R].ENVGIYNLSK.[G]	1xHexNAc(2)Hex(6) [N7]	1	Q5JPE7	Q5JPE7 [612-621]	0	2515.07	HexNAc(2)Hex(6)	0	612	4.97	231.7	107	107	1.07321e-05	1.26585e-06	0	0	0.00100223	0.00163399	0.00155521	0.00170068	High
High	[R].EAGNHTSGAGLVQINK.[S]	1xHexNAc(2)Hex(7) [N4]	1	P20645	P20645 [80-95]	0	3136.34	HexNAc(2)Hex(7)	0	80	4.92	177.2	74.3	69.8	1.19676e-05	1.3739e-06	0	0	0.00111751	0.00163399	0.00153374	0.00167504	High
High	[K].NPVGLIGAENATGETDPSHSK.[F]	1xHexNAc(2)Hex(6) [N10]	1	P43251	P43251 [340-360]	0	3472.49	HexNAc(2)Hex(6)	0	340	4.87	283.7	190.1	190.1	1.35786e-05	1.50755e-06	0	0	0.000123857	2.87714e-05	0	0	High
High	[R].YYNQSEAGSHTLQR.[M]	1xHexNAc(2)Hex(9) [N3]	1	P30485	P30485 [108-121]	0	3518.4	HexNAc(2)Hex(9)	0	108	4.8	225.9	85.9	85.9	1.60122e-05	1.7134e-06	0	0	0.00149475	0.00163399	0.00149031	0.00162866	High
High	[K].NNHTASILDR.[M]	1xHexNAc(2)Hex(9) [N2]	1	P08962	P08962 [129-138]	0	3005.21	HexNAc(2)Hex(9)	0	129	4.71	233.4	9.7	9.7	1.95013e-05	1.95431e-06	0	0	0.00182001	0.00163399	0.00147929	0.00161551	High
High	[R].NVTWK.[L]	1xHexNAc(2)Hex(6) [N1]	1	P50454	P50454 [125-129]	0	2025.83	HexNAc(2)Hex(6)	0	125	4.71	277.6	82	82	1.96971e-05	2.03167e-06	0	0	0.000179667	3.88729e-05	0	0	High
High	[K].NETIWYLK.[Y]	1xHexNAc(2)Hex(6) [N1]	1	O15342	O15342 [70-77]	0	2445.03	HexNAc(2)Hex(6)	0	70	4.71	269.9	84.2	84.2	1.96971e-05	2.05746e-06	0	0	0.000179667	3.91495e-05	0	0	High
High	[R].NTTIFLK.[F]	1xHexNAc(2)Hex(7) [N1]	1	Q8NBN3	Q8NBN3 [62-68]	0	2377.02	HexNAc(2)Hex(7)	0	62	4.68	219.5	142.7	142.7	2.11166e-05	2.29729e-06	0	0	0.00197053	0.00163399	0.00145985	0.00159236	High
High	[K].KDTCTQECSYFNITK.[V]	1xHexNAc(2)Hex(6) [N12]; 2xCarbamidomethyl [C4; C8]	1	P05556	P05556 [658-672]	1	3273.31	HexNAc(2)Hex(6)	0	658	4.54	147.7	53.8	53.8	2.91092e-05	2.88265e-06	0	0	0.00271481	0.00163399	0.00142857	0.0015625	High
High	[K].CATVTENATGDLATSR.[N]	1xHexNAc(2)Hex(8) [N7]; 1xCarbamidomethyl [C1]	1	O43291	O43291 [88-103]	0	3369.35	HexNAc(2)Hex(8)	0	88	4.53	233.4	65.5	65.5	2.9812e-05	2.9574e-06	0	0	0.000271928	5.32937e-05	0	0	High
High	[R].LLNINPNK.[T]	1xHexNAc(5)Hex(6)Fuc(1)NeuAc(1) [N7]	1	P11279	P11279 [255-262]	0	3350.41	HexNAc(5)Hex(6)Fuc(1)NeuAc(1)	0	255	4.37	262.3	70.2	70.2	4.23265e-05	3.99532e-06	0	0	0.00394374	0.00163399	0.00138122	0.00151286	High
High	[R].LLNINPNK.[T]	1xHexNAc(4)Hex(5)Fuc(1) [N7]	3	P11279	P11279 [255-262]	0	2694.19	HexNAc(4)Hex(5)Fuc(1)	0	255	4.31	214.3	69.5	69.5	4.91075e-05	4.55608e-06	0	0	0.00457333	0.00163399	0.00136054	0.00149031	High
High	[R].TVNVSVPK.[K]	1xHexNAc(2)Hex(7) [N3]	1	Q96KA5	Q96KA5 [89-96]	0	2384.02	HexNAc(2)Hex(7)	0	89	4.31	186.7	82.6	82.6	4.91075e-05	4.49644e-06	0	0	0.00457333	0.00163399	0.0013624	0.00149254	High
High	[R].IAPASNVSHTVVLR.[P]	1xHexNAc(2)Hex(7) [N6]	1	P43308	P43308 [83-96]	0	3004.36	HexNAc(2)Hex(7)	0	83	4.21	248.1	72.4	72.4	6.16234e-05	5.29789e-06	0	0	0.00573377	0.0027137	0.00266667	0.00293255	High
High	[R].NVTHHVSVTK.[Q]	1xHexNAc(2)Hex(6) [N1]	1	O94901	O94901 [588-597]	0	2500.08	HexNAc(2)Hex(6)	0	588	4.21	285.7	71.8	71.8	6.1795e-05	5.37223e-06	0	0	0.00574967	0.0027137	0.00266312	0.00292826	High
High	[R].DAGVVCTNETR.[S]	1xHexNAc(2)Hex(8) [N8]; 1xCarbamidomethyl [C6]	2	Q08380	Q08380 [118-128]	0	2924.13	HexNAc(2)Hex(8)	0	118	4.2	189.8	96.5	96.5	6.28381e-05	5.44774e-06	0	0	0.00584628	0.0027137	0.00265957	0.00292398	High
High	[R].ELAVPDGYTNR.[T]	1xHexNAc(2)Hex(8) [N10]	1	P26006	P26006 [77-87]	0	2937.19	HexNAc(2)Hex(8)	0	77	4.2	155.5	85.6	85.6	6.28381e-05	5.52305e-06	0	0	0.00584628	0.0027137	0.00265604	0.00291971	High
High	[R].AEPPLNASASDQGEK.[V]	1xDeamidated [Q12]; 1xHexNAc(2)Hex(4) [N6]	1	Q9Y4L1	Q9Y4L1 [926-940]	0	2569.07	HexNAc(2)Hex(4)	0	926	4.19	289.1	155.6	155.6	6.38711e-05	5.74917e-06	0	0	0.00594196	0.0027137	0.0026455	0.00290698	High
High	[R].NCSAAPQPEPAAGLASYPELR.[L]	1xHexNAc(2)Hex(8) [N1]; 1xCarbamidomethyl [C2]	1	O75718	O75718 [87-107]	0	3901.63	HexNAc(2)Hex(8)	0	87	4.03	223.6	188.7	188.7	9.37981e-05	0.00129534	0.00126422	0.00146628	0.000855538	0.00163399	0.00157729	0.00172414	High
High	[R].VQPFNVTQGK.[Y]	1xHexNAc(5)Hex(6)NeuAc(1) [N5]	1	P13473	P13473 [352-361]	0	3396.41	HexNAc(5)Hex(6)NeuAc(1)	0	352	3.99	220.2	65.9	65.9	0.00010196	0.00129534	0.00125628	0.00145985	0.00945951	0.0027137	0.00255102	0.00280505	High
High	[R].VQPFNVTQGK.[Y]	1xHexNAc(5)Hex(6)NeuAc(2) [N5]	1	P13473	P13473 [352-361]	0	3687.5	HexNAc(5)Hex(6)NeuAc(2)	0	352	3.99	147.1	44	44	0.00010196	0.00129534	0.0012547	0.00145773	0.00945951	0.0027137	0.00254777	0.00280112	High
High	[R].GNVISSHGNPILLNSSIPEDPSIK.[A]	1xHexNAc(2)Hex(8) [N14]	1	P21589	P21589 [298-321]	0	4190.89	HexNAc(2)Hex(8)	0	298	3.95	111	96.2	24.6	0.000112953	0.00129534	0.00123916	0.00143885	0.0104712	0.0027137	0.00251889	0.00276625	High
High	[R].DVNCSVMGPQEK.[K]	1xCarbamidomethyl [C4]; 1xOxidation [M7]; 1xHexNAc(2)Hex(3)Fuc(1) [N3]	1	P53634	P53634 [51-62]	0	2417.97	HexNAc(2)Hex(3)Fuc(1)	0	51	3.88	196.9	143.3	143.3	0.00013038	0.00129534	0.00122699	0.00142857	0.00118918	0.00163399	0.00151745	0.00165563	High
High	[K].ISSLQTTEKNDTVAGQGER.[D]	1xDeamidated [Q5]; 1xHexNAc(6)Hex(3) [N10]	1	P06756	P06756 [865-883]	1	3739.63	HexNAc(6)Hex(3)	0	865	3.8	260.9	137.6	40.6	0.000159636	0.00129534	0.0011976	0.00140252	0.0147497	0.0027137	0.00246002	0.00270636	High
High	[R].EEEAIQLDGLNASQIR.[E]	1xHexNAc(2)Hex(6) [N11]	1	P14625	P14625 [52-67]	0	3164.37	HexNAc(2)Hex(6)	0	52	3.79	155.9	85.5	85.5	0.000163465	0.00129534	0.00119474	0.00140056	0.0150994	0.0027137	0.00245399	0.00269905	High
High	[K].LIDNNKTEK.[E]	1xHexNAc(2)Hex(4)Fuc(1) [N5]	1	P07602	P07602 [328-336]	1	2275.01	HexNAc(2)Hex(4)Fuc(1)	0	328	3.79	284.1	55.3	55.3	0.000163498	0.00129534	0.00119332	0.0013986	0.0151024	0.0027137	0.00245098	0.00269542	High
High	[R].LLNINPNK.[T]	1xHexNAc(6)Hex(7)Fuc(1) [N7]	1	P11279	P11279 [255-262]	0	3424.45	HexNAc(6)Hex(7)Fuc(1)	0	255	3.72	205.9	60.8	60.8	0.000188675	0.00129534	0.00118906	0.0013947	0.0173968	0.0027137	0.00243013	0.0026738	High
High	[R].ANHSGAVVLLK.[R]	1xHexNAc(6)Hex(3) [N2]	1	P23229	P23229 [322-332]	0	2813.28	HexNAc(6)Hex(3)	0	322	3.72	228	63.3	63.3	0.000190059	0.00129534	0.00118483	0.00139082	0.0175227	0.0027137	0.00241838	0.00266312	High
High	[R].TNSTFVQALVEHVK.[E]	1xHexNAc(2)Hex(9) [N2]	1	P07602	P07602 [214-227]	0	3437.47	HexNAc(2)Hex(9)	0	214	3.69	154.6	6.2	6.2	0.000202735	0.00129534	0.00117786	0.00138504	0.0186745	0.0027137	0.00240096	0.00264901	High
High	[R].GYYNQSEAGSHTVQR.[M]	1xHexNAc(6)Hex(4) [N4]	1	P01892	P01892 [107-121]	0	3563.45	HexNAc(6)Hex(4)	0	107	3.67	177	44.2	44.2	0.000213533	0.00129534	0.00117647	0.00138313	0.0196541	0.0027137	0.00239808	0.0026455	High
High	[K].VASVININPNTTHSTGSCR.[S]	1xDeamidated [N8]; 1xCarbamidomethyl [C18]; 1xHexNAc(3)Hex(6) [N10]	1	P13473	P13473 [248-266]	0	3610.53	HexNAc(3)Hex(6)	0	248	3.66	139.3	73	59.2	0.000217933	0.00129534	0.00117371	0.00137931	0.0200528	0.0027137	0.00238663	0.00263158	High
High	[K].ENQNHSYSLK.[S]	1xHexNAc(2)Hex(8) [N4]	2	P06756	P06756 [942-951]	0	2922.15	HexNAc(2)Hex(8)	0	942	3.63	188.8	56.8	56.8	0.000236496	0.00129534	0.00116959	0.00137363	0.0217323	0.0027137	0.00237248	0.00261438	High
High	[R].ESNITVLIK.[L]	1xHexNAc(2)Hex(6) [N3]	1	Q9H5V8	Q9H5V8 [37-45]	0	2395.07	HexNAc(2)Hex(6)	0	37	3.62	202.9	18.5	18.5	0.000242034	0.00129534	0.00116279	0.00136986	0.0222324	0.00352526	0.00352113	0.00388098	High
High	[R].TSIPTINMENK.[T]	1xOxidation [M8]; 1xHexNAc(4)Hex(5)NeuAc(1) [N10]	1	P26006	P26006 [960-970]	0	3177.3	HexNAc(4)Hex(5)NeuAc(1)	0	960	3.58	192.6	36.4	36.4	0.000261504	0.00129534	0.00115741	0.0013624	0.0239878	0.00466744	0.004662	0.00513479	High
High	[K].TLSPTGNISSAPK.[D]	1xHexNAc(2)Hex(4) [N7]	1	O94901	O94901 [726-738]	0	2327.05	HexNAc(2)Hex(4)	0	726	3.52	201.3	6.5	6.5	0.000299502	0.00129534	0.00114025	0.00134409	0.0273998	0.00686499	0.00681044	0.0075	High
High	[R].TCSSNLTLTSGSK.[H]	1xCarbamidomethyl [C2]; 1xHexNAc(4)Hex(5)Fuc(1)NeuAc(1) [N5]	1	Q9H5V8	Q9H5V8 [382-394]	0	3415.38	HexNAc(4)Hex(5)Fuc(1)NeuAc(1)	0	382	3.52	152.4	5.3	5.3	0.000299502	0.00129534	0.00114155	0.00134589	0.0273998	0.00686499	0.00681818	0.00750939	High
High	[R].EAGNHTSGAGLVQINK.[S]	1xHexNAc(5)Hex(6)Fuc(1)NeuAc(1) [N4]	1	P20645	P20645 [80-95]	0	4020.68	HexNAc(5)Hex(6)Fuc(1)NeuAc(1)	1	80	3.52	149.7	52.5	52.5	0.000299545	0.00129534	0.00113766	0.00134048	0.0274036	0.00686499	0.00678733	0.00747198	High
High	[K].NITIVTGAPR.[H]	1xHexNAc(4)Hex(5) [N1]	1	P26006	P26006 [265-274]	0	2664.19	HexNAc(4)Hex(5)	0	265	3.48	151.3	41.1	41.1	0.0003308	0.00129534	0.00112613	0.00132626	0.0301964	0.0100559	0.0100446	0.0110565	High
High	[K].NITIVTGAPR.[H]	1xHexNAc(5)Hex(6)NeuAc(3) [N1]	1	P26006	P26006 [265-274]	0	3902.61	HexNAc(5)Hex(6)NeuAc(3)	0	265	3.47	128.2	28.1	28.1	0.000335619	0.00129534	0.00111982	0.00131752	0.0306259	0.0100559	0.00996678	0.0109622	High
High	[K].NITIVTGAPR.[H]	1xHexNAc(3)Hex(5)NeuAc(1) [N1]	1	P26006	P26006 [265-274]	0	2752.2	HexNAc(3)Hex(5)NeuAc(1)	0	265	3.47	152.4	15	15	0.000335619	0.00129534	0.00112108	0.00131926	0.0306259	0.0100559	0.00997783	0.0109756	High
High	[K].QNISVTLR.[T]	1xHexNAc(2)Hex(8) [N2]	1	Q9H5V8	Q9H5V8 [511-518]	0	2633.12	HexNAc(2)Hex(8)	0	511	3.47	179.7	59.7	59.7	0.000337908	0.00129534	0.00111483	0.00131234	0.0308298	0.0100559	0.00991189	0.0109091	High
High	[K].LVANESVPFETSCR.[Y]	1xHexNAc(2)Hex(6) [N4]; 1xCarbamidomethyl [C13]	1	Q9NXG6	Q9NXG6 [345-358]	0	2987.24	HexNAc(2)Hex(6)	0	345	3.44	251.9	95.1	95.1	0.000362747	0.00129534	0.00111235	0.0013089	0.00330808	0.00163399	0.00140449	0.00153846	High
High	[K].NFSIQVR.[Q]	1xHexNAc(2)Hex(8) [N1]	1	P05106	P05106 [125-131]	0	2566.05	HexNAc(2)Hex(8)	0	125	3.3	203.1	72.7	72.7	0.00050153	0.00129534	0.00110254	0.0012987	0.00457333	0.00163399	0.0013587	0.0014881	High
High	[R].TVNVSVPK.[K]	1xHexNAc(2)Hex(8) [N3]	1	Q96KA5	Q96KA5 [89-96]	0	2546.07	HexNAc(2)Hex(8)	0	89	3.29	57.2	52.1	52.1	0.000515531	0.00129534	0.00110132	0.00129702	0.0430005	0.0100559	0.00985761	0.0108434	High
High	[R].GINESYK.[K]	1xHexNAc(2)Hex(7) [N3]	1	P50897	P50897 [210-216]	0	2350.93	HexNAc(2)Hex(7)	0	210	3.26	174.6	20.5	20.5	0.000548398	0.00220264	0.0021978	0.00259067	0.0452197	0.0100559	0.00982533	0.0108043	High
High	[R].GSPGNGSSHSGAPGPDPTLAR.[G]	1xHexNAc(6)Hex(3) [N5]	1	Q9BRK3	Q9BRK3 [302-322]	0	3623.53	HexNAc(6)Hex(3)	0	302	3.26	199	148	148	0.000551601	0.00220264	0.00219539	0.00258732	0.00502976	0.0027137	0.00269905	0.00296296	High
High	[K].TVTTSGTTNNTVTPTSQPVR.[K]	1xHexNAc(6)Hex(4) [N9]	1	Q04900	Q04900 [138-157]	0	3928.73	HexNAc(6)Hex(4)	0	138	2.97	205.7	137.3	137.3	0.00107905	0.00220264	0.00214362	0.00254453	0.00983609	0.0027137	0.00253807	0.0027894	High
High	[R].SEMTDNQNNSK.[S]	1xOxidation [M3]; 1xHexNAc(2)Hex(10) [N8]	1	P49454	P49454 [1112-1122]	0	3310.2	HexNAc(2)Hex(10)	0	1112	2.87	123.3	33.9	33.9	0.00134703	0.00220264	0.00213447	0.00253485	0.0122767	0.0027137	0.00249688	0.00274725	High
High	[R].SEMTDNQNNSK.[S]	1xHexNAc(2)Hex(7) [N8]; 1xOxidation [M3]	1	P49454	P49454 [1112-1122]	0	2824.05	HexNAc(2)Hex(7)	0	1112	2.81	194.4	94.7	94.7	0.00155166	0.00220264	0.00212766	0.00252525	0.0141399	0.0027137	0.00246609	0.00271003	High
High	[K].DINESDEVEVYSR.[A]	1xHexNAc(2)Hex(7) [N3]	1	Q06787	Q06787 [58-70]	0	3095.22	HexNAc(2)Hex(7)	0	58	2.75	252.7	26.1	26.1	0.00175982	0.00220264	0.00211416	0.00250941	0.0160347	0.0027137	0.00243902	0.00268456	High
High	[K].NVSCLWCNTNK.[A]	1xHexNAc(2)Hex(6) [N1]; 2xCarbamidomethyl [C4; C7]	1	P53801	P53801 [54-64]	0	2774.09	HexNAc(2)Hex(6)	0	54	2.72	174.8	120.1	120.1	0.00192091	0.00220264	0.00210526	0.0025	0.0175007	0.0027137	0.00242131	0.00266667	High
High	[R].MDPPCTNTTAASTYLNNPYVR.[K]	1xHexNAc(2)Hex(8) [N7]; 1xCarbamidomethyl [C5]; 1xOxidation [M1]	1	P10619	P10619 [327-347]	0	4104.66	HexNAc(2)Hex(8)	0	327	2.61	71	48	22	0.00243994	0.00220264	0.00207469	0.00246914	0.157877	0.0137421	0.0135558	0.014977	High
High	[K].PFNLSQGK.[K]	1xHexNAc(4)Hex(7) [N3]	1	Q9ULW0	Q9ULW0 [306-313]	0	2837.16	HexNAc(4)Hex(7)	0	306	2.57	258.8	53.1	53.1	0.0026891	0.00414079	0.0041365	0.00492005	0.0244875	0.00466744	0.00465116	0.00512164	High
High	[R].EERPLNASALK.[L]	1xHexNAc(2)Hex(6) [N6]	1	O14657	O14657 [59-69]	0	2606.14	HexNAc(2)Hex(6)	0	59	2.55	199.2	46.3	46.3	0.00284791	0.00414079	0.00413223	0.004914	0.025931	0.00580046	0.00577367	0.00636132	High
High	[R].NQTHYALQASLK.[L]	1xHexNAc(2)Hex(6) [N1]	1	Q6P179	Q6P179 [294-305]	0	2752.19	HexNAc(2)Hex(6)	0	294	2.54	224.3	30.9	30.9	0.0028562	0.00414079	0.00412797	0.00490797	0.0260064	0.00580046	0.00575374	0.00633713	High
High	[R].YNCSIESPR.[K]	1xHexNAc(2)Hex(7) [N2]; 1xCarbamidomethyl [C3]	1	O00469	O00469 [695-703]	0	2666.03	HexNAc(2)Hex(7)	0	695	2.47	151.2	24.6	24.6	0.00336464	0.00414079	0.00411523	0.00489596	0.0306259	0.0100559	0.01	0.0110024	High
High	[R].GYYNQSEAGSHTVQR.[M]	1xDeamidated [Q5]; 1xHexNAc(4)Hex(5)Fuc(1) [N4]	1	P01892	P01892 [107-121]	0	3466.39	HexNAc(4)Hex(5)Fuc(1)	0	107	2.4	113.3	35.6	35.6	0.00394396	0.00414079	0.00410678	0.004884	0.230332	0.0207469	0.0207039	0.0228571	High
High	[R].DAGVVCTNETR.[S]	1xCarbamidomethyl [C6]; 1xHexNAc(6)Hex(4) [N8]	1	Q08380	Q08380 [118-128]	0	3088.24	HexNAc(6)Hex(4)	0	118	2.39	177.7	36.3	36.3	0.00402726	0.00414079	0.00410256	0.00487805	0.233985	0.0207469	0.0206825	0.022831	High
High	[R].EERPLNASALK.[L]	1xHexNAc(6)Hex(4) [N6]	1	O14657	O14657 [59-69]	0	3094.36	HexNAc(6)Hex(4)	0	59	2.32	193.7	87.3	87.3	0.00481507	0.00414079	0.00407747	0.00486027	0.043451	0.0100559	0.00984683	0.0108303	High
High	[K].WQMNFTVR.[Y]	1xOxidation [M3]; 1xHexNAc(5)Hex(6)NeuAc(1) [N4]	1	P13473	P13473 [46-53]	0	3376.33	HexNAc(5)Hex(6)NeuAc(1)	0	46	2.3	187.1	15.9	15.9	0.00497396	0.00414079	0.00406091	0.00483676	0.273234	0.0245399	0.0244648	0.027027	High
High	[R].LNSSTIK.[Y]	1xHexNAc(6)Hex(7)NeuAc(2) [N2]	1	P13473	P13473 [274-280]	0	3697.47	HexNAc(6)Hex(7)NeuAc(2)	0	274	2.3	141.8	0.5	0.5	0.00497396	0.00414079	0.00406918	0.00484848	0.273234	0.0225641	0.0225179	0.0248869	High
High	[K].WQMNFTVR.[Y]	1xOxidation [M3]; 1xHexNAc(5)Hex(6)NeuAc(2) [N4]	1	P13473	P13473 [46-53]	0	3667.42	HexNAc(5)Hex(6)NeuAc(2)	0	46	2.3	191	11.8	11.8	0.00497396	0.00414079	0.00405679	0.00483092	0.273234	0.0245399	0.0244399	0.0269966	High
High	[K].ILNGSNK.[K]	1xHexNAc(4)Hex(5)Fuc(1)NeuAc(1) [N3]	1	Q9UBV2	Q9UBV2 [193-199]	0	2805.16	HexNAc(4)Hex(5)Fuc(1)NeuAc(1)	0	193	2.3	168.8	7.3	7.3	0.00497396	0.00414079	0.00405268	0.00482509	0.273234	0.0245399	0.0244151	0.0269663	High
High	[R].YYNQSEAGSHTLQR.[M]	1xHexNAc(4)Hex(5)Fuc(1) [N3]	1	P30485	P30485 [108-121]	0	3422.4	HexNAc(4)Hex(5)Fuc(1)	0	108	2.26	167.3	4.5	4.5	0.00550648	0.00414079	0.00404858	0.00481928	0.293628	0.0245399	0.0242669	0.0267857	High
High	[K].CNMINGTDGDSFHPLITK.[D]	1xHexNAc(2)Hex(7) [N5]; 1xCarbamidomethyl [C1]; 1xOxidation [M3]	1	Q14108	Q14108 [245-262]	0	3576.45	HexNAc(2)Hex(7)	0	245	2.24	29.5	0	0	0.00572085	0.00414079	0.0040404	0.00480769	0.301525	0.0252781	0.0252525	0.0278707	High
High	[R].ALGFENATQALGR.[A]	1xHexNAc(6)Hex(3) [N6]	1	Q08380	Q08380 [64-76]	0	3052.34	HexNAc(6)Hex(3)	0	64	2.22	179.9	16.3	16.3	0.00600357	0.00414079	0.00403226	0.00480192	0.311679	0.028169	0.0281124	0.0310421	High
High	[R].NLSISTK.[N]	1xHexNAc(2)Hex(6) [N1]	1	A8K979	A8K979 [674-680]	0	2140.91	HexNAc(2)Hex(6)	0	674	2.19	239.1	18.9	18.9	0.00650999	0.00414079	0.0040201	0.00479042	0.0211628	0.0027137	0.00237812	0.00262123	High
High	[K].LPNLTHLNLSGNK.[L]	1xHexNAc(5)Hex(6)NeuAc(1) [N3]	1	Q92688	Q92688 [87-99]	0	3699.6	HexNAc(5)Hex(6)NeuAc(1)	0	87	2.18	33.5	5	5	0.00659302	0.00414079	0.00401204	0.00478469	0.331948	0.029	0.0288845	0.0319383	High
High	[R].LVYNK.[T]	1xHexNAc(2)Hex(3)Fuc(1) [N4]	1	Q8NCC3	Q8NCC3 [96-100]	0	1674.75	HexNAc(2)Hex(3)Fuc(1)	0	96	2.18	154.7	91.6	91.6	0.00662217	0.00414079	0.00400802	0.00477897	0.0215274	0.0027137	0.0023753	0.0026178	High
High	[K].AAENFTLLVK.[N]	1xHexNAc(2)Hex(8) [N4]	1	Q99571	Q99571 [181-190]	0	2808.21	HexNAc(2)Hex(8)	0	181	2.17	59.4	40.8	40.8	0.00681523	0.00414079	0.003996	0.0047619	0.0221547	0.0027137	0.00235018	0.00259067	High
High	[K].YVHADAPTNK.[T]	1xHexNAc(5)Hex(6)NeuAc(3) [N9]	1	Q92922	Q92922 [66-75]	0	3976.55	HexNAc(5)Hex(6)NeuAc(3)	0	66	2.16	130.2	5.5	5.5	0.00683916	0.00414079	0.00399202	0.00475624	0.0222324	0.00352526	0.003517	0.00387597	High
High	[KR].LINR.[ST]	1xHexNAc(2)Hex(5) [N3]	3	Q8TEP8	Q8TEP8 [926-929]	0	1731.75	HexNAc(2)Hex(5)	0	926	2.14	138.7	86.2	86.2	0.00716789	0.00414079	0.00398804	0.00475059	0.0233006	0.00352526	0.00350058	0.00385604	High
High	[K].TNITLVCK.[P]	1xHexNAc(2)Hex(7) [N2]; 1xCarbamidomethyl [C7]	1	P11717	P11717 [580-587]	0	2489.05	HexNAc(2)Hex(7)	0	580	2.14	148.3	44.9	44.9	0.00725536	0.00414079	0.00398406	0.00474496	0.353333	0.0318725	0.0318408	0.0352035	High
High	[K].DLVVQQAGTNK.[T]	1xHexNAc(2)Hex(7) [N10]	1	P25942	P25942 [171-181]	0	2713.16	HexNAc(2)Hex(7)	0	171	2.13	138.1	75	75	0.00743647	0.00414079	0.0039801	0.00473934	0.0241732	0.00466744	0.00465658	0.0051282	High
High	[R].VNNTLSSQISR.[L]	1xHexNAc(2)Hex(5) [N2]	1	P11047	P11047 [1106-1116]	0	2435.07	HexNAc(2)Hex(5)	0	1106	2.1	73	44.6	44.6	0.00797749	0.00414079	0.00396825	0.00472813	0.025931	0.00580046	0.00578035	0.00636943	High
High	[R].DMNQTLGDNITVK.[M]	1xHexNAc(2)Hex(7) [N3]; 1xDeamidated [Q4]; 1xOxidation [M2]	1	Q8TCT8	Q8TCT8 [147-159]	0	3006.21	HexNAc(2)Hex(7)	0	147	2.06	173	87.1	87.1	0.00871036	0.00414079	0.0039604	0.00471698	0.0283119	0.00904977	0.00897867	0.00988875	High
High	[K].LYTSAPNTSQGK.[D]	1xHexNAc(3)Hex(6) [N7]	1	Q5QJE6	Q5QJE6 [426-437]	0	2848.19	HexNAc(3)Hex(6)	0	426	1.98	37.9	37.9	37.9	0.0105193	0.00493583	0.00493097	0.00588235	0.0258744	0.00580046	0.00578704	0.00637755	High
High	[K].AFNQSSNYTTHK.[V]	1xHexNAc(3)Hex(4)Fuc(1)NeuAc(1) [N7]; 1xHexNAc(2)Hex(1)Fuc(1) [N3]	1	A6NNF4	A6NNF4 [237-248]	0	3806.52	HexNAc(2)Hex(1)Fuc(1); HexNAc(3)Hex(4)Fuc(1)NeuAc(1)	0	237	1.98	183	12	6.6	0.0105729	0.00493583	0.00492126	0.00586854	0.0260064	0.00580046	0.00574713	0.00632911	High
High	[R].FVHVNTSAVLK.[L]	1xHexNAc(2)Hex(8) [N5]	1	Q9Y6A1	Q9Y6A1 [467-477]	0	2917.27	HexNAc(2)Hex(8)	0	467	1.98	155.9	23.1	23.1	0.0105729	0.00493583	0.00491642	0.00586166	0.0260064	0.00580046	0.00574053	0.00632111	High
High	[K].TEEMPNDSVLENK.[S]	1xHexNAc(4)Hex(5)Fuc(1)NeuAc(1) [N6]	1	P49321	P49321 [490-502]	0	3565.41	HexNAc(4)Hex(5)Fuc(1)NeuAc(1)	0	490	1.95	113.4	20	4.7	0.0111396	0.00493583	0.00489716	0.00583431	0.0273998	0.00686499	0.00680272	0.00749064	High
High	[K].NFTMNEK.[L]	1xOxidation [M4]; 1xHexNAc(2)Hex(3) [N1]	1	Q92820	Q92820 [203-209]	0	1791.71	HexNAc(2)Hex(3)	0	203	1.9	141.2	47.4	47.4	0.0125347	0.00493583	0.00488759	0.00582072	0.0308298	0.0100559	0.00995575	0.0109489	High
High	[KR].LINR.[ST]	1xHexNAc(2)Hex(9) [N3]	3	Q8TEP8	Q8TEP8 [926-929]	0	2379.96	HexNAc(2)Hex(9)	0	926	1.89	42.4	42.4	42.4	0.012743	0.00493583	0.00488281	0.00581395	0.0413313	0.0100559	0.00989011	0.0108827	High
High	[KR].LINR.[ST]	1xHexNAc(2)Hex(8) [N3]	3	Q8TEP8	Q8TEP8 [926-929]	0	2217.91	HexNAc(2)Hex(8)	0	926	1.88	78.6	58.5	58.5	0.013261	0.00493583	0.00487329	0.0058072	0.0430005	0.0100559	0.00987925	0.0108696	High
High	[R].NHSMGHISSK.[S]	1xHexNAc(2)Hex(7) [N1]	1	Q8TBZ3	Q8TBZ3 [481-490]	0	2638.04	HexNAc(2)Hex(7)	0	481	1.85	190	87.4	87.4	0.0141474	0.00493583	0.00485909	0.00578704	0.0279886	0.00904977	0.00900901	0.00991326	High
High	[R].ESNITVLIK.[L]	1xHexNAc(2)Hex(5) [N3]	1	Q9H5V8	Q9H5V8 [37-45]	0	2233.02	HexNAc(2)Hex(5)	0	37	1.83	155.4	21.8	21.8	0.0147946	0.00493583	0.00482625	0.00574713	0.526769	0.0374016	0.0372184	0.0411701	High
High	[K].GSLSYLNVTR.[K]	1xHexNAc(2)Hex(9) [N7]	1	P07339	P07339 [257-266]	0	2974.23	HexNAc(2)Hex(9)	0	257	1.83	137.4	30.9	30.9	0.0147946	0.00493583	0.00483092	0.00575374	0.526769	0.0374016	0.0372549	0.0412147	High
High	[K].LHYPNASSQTPNFPAPER.[R]	1xHexNAc(3)Hex(4)Fuc(1)NeuAc(1) [N5]	1	Q9UPX6	Q9UPX6 [393-410]	0	3720.58	HexNAc(3)Hex(4)Fuc(1)NeuAc(1)	0	393	1.75	63.3	1.7	1.7	0.01761	0.00771456	0.00770713	0.00917431	0.0291374	0.00904977	0.00894854	0.00985222	High
High	[R].ESNITVLIK.[L]	1xHexNAc(2)Hex(7) [N3]	1	Q9H5V8	Q9H5V8 [37-45]	0	2557.13	HexNAc(2)Hex(7)	0	37	1.74	63.1	26.7	26.7	0.0182367	0.00771456	0.00767018	0.00914286	0.578879	0.0522244	0.0521739	0.057754	High
High	[R].VLAPGIYVCNATNR.[H]	1xHexNAc(2)Hex(9) [N10]; 1xCarbamidomethyl [C9]	1	Q9UMF0	Q9UMF0 [637-650]	0	3412.43	HexNAc(2)Hex(9)	0	637	1.74	95.5	39.9	39.9	0.01837	0.00771456	0.00766283	0.00913242	0.0303946	0.0100559	0.0100223	0.0110294	High
High	[RK].NITEGLK.[ED]	1xHexNAc(2)Hex(6) [N1]	2	Q86UQ4	Q86UQ4 [1764-1770]	0	2152.91	HexNAc(2)Hex(6)	0	1764	1.73	191.1	3	3	0.0184169	0.00771456	0.00764818	0.00911162	0.0452197	0.0100559	0.00980392	0.0107784	High
High	[RK].NITEGLK.[ED]	1xHexNAc(2)Hex(7) [N1]	2	Q86UQ4	Q86UQ4 [1764-1770]	0	2314.96	HexNAc(2)Hex(7)	0	1764	1.73	180.7	22.3	22.3	0.0184169	0.00771456	0.0076555	0.00912201	0.0452197	0.0100559	0.00981461	0.0107914	High
High	[K].ENTSDPSLVIAFGR.[G]	1xHexNAc(6)Hex(3) [N2]	1	P11279	P11279 [83-96]	0	3210.39	HexNAc(6)Hex(3)	0	83	1.72	75	49.4	49.4	0.0188808	0.00771456	0.00764088	0.00910125	0.587414	0.0531401	0.0530888	0.0587607	High
High	[K].NIETNYTR.[I]	1xHexNAc(2)Hex(3) [N5]	1	O75503	O75503 [251-258]	0	1902.81	HexNAc(2)Hex(3)	0	251	1.58	219	52.4	52.4	0.0260065	0.00953289	0.00952381	0.0113379	0.0430005	0.0100559	0.00986842	0.0108565	High
High	[K].NTSVEHTR.[L]	1xHexNAc(2)Hex(8) [N1]	1	Q96JJ7	Q96JJ7 [258-265]	0	2646.04	HexNAc(2)Hex(8)	0	258	1.56	161.7	4	4	0.0273512	0.00953289	0.00951475	0.011325	0.0452197	0.0100559	0.00983606	0.0108173	High
High	[KR].LINR.[ST]	1xHexNAc(2)Hex(6) [N3]	3	Q8TEP8	Q8TEP8 [926-929]	0	1893.81	HexNAc(2)Hex(6)	0	926	1.55	149.3	47.9	47.9	0.0284974	0.00953289	0.0095057	0.0113122	0.0920091	0.012945	0.012931	0.0142687	High
High	[K].ENSTASEVLDSLSQSVHVK.[P]	1xHexNAc(3)Hex(4)Fuc(1)NeuAc(1) [N2]	1	O94966	O94966 [706-724]	0	3724.61	HexNAc(3)Hex(4)Fuc(1)NeuAc(1)	0	706	1.53	80.5	5.8	5.8	0.0293783	0.00953289	0.00947867	0.0112994	0.0366174	0.0100559	0.00990099	0.0108959	High
High	[R].EERPLNASALK.[L]	1xHexNAc(6)Hex(3) [N6]	1	O14657	O14657 [59-69]	0	2932.3	HexNAc(6)Hex(3)	0	59	1.5	170.2	59.5	59.5	0.0319684	0.00953289	0.00945179	0.0112613	0.274604	0.0245399	0.0243161	0.0268456	High
High	[K].NATLAEQAK.[L]	1xHexNAc(2)Hex(9) [N1]	1	Q9Y4L1	Q9Y4L1 [869-877]	0	2810.13	HexNAc(2)Hex(9)	0	869	1.48	80.3	5.5	5.5	0.0334949	0.00953289	0.00944287	0.0112486	0.718695	0.0531401	0.052682	0.0583864	High
High	[R].VNNTLSSQISR.[L]	1xHexNAc(4)Hex(5)Fuc(1) [N2]	1	P11047	P11047 [1106-1116]	0	2987.28	HexNAc(4)Hex(5)Fuc(1)	0	1106	1.45	125.2	37.5	37.5	0.0356425	0.00953289	0.00941619	0.0112233	0.114928	0.012945	0.0128755	0.0142012	High

## Sheet: Sequential enrichment
Sequential enriched intact glycopeptides
Confidence	Annotated Sequence	Modifications	# PSMs	Master Protein Accessions	Positions in Master Proteins	# Missed Cleavages	Theo. MH+ [Da]	Glycan composition	Off By X	Position in Protein	|Log Prob| A2	Byonic Score A2	Delta Byonic Score A2	PEP 2D A2	q-Value 2D A2	FDR 2D A2	Peptide Group FDR 2D A2	PEP 1D A2	q-Value 1D A2	FDR 1D A2	Peptide Group FDR 1D A2	Confidence A2
High	[K].AAIPSALDTNSSK.[S]	1xHexNAc(5)Hex(6)Fuc(1)NeuAc(2) [N10]	1	Q08380	Q08380 [542-554]	0	3990.62	HexNAc(5)Hex(6)Fuc(1)NeuAc(2)	0	542	3.51	185.7	12.9	0.00031171	2.15669e-05	0	0	0.521488	0.0846354	0.0844156	0.0950292	High
High	[K].AAIPSALDTNSSK.[S]	1xHexNAc(4)Hex(5)Fuc(1)NeuAc(2) [N10]	1	Q08380	Q08380 [542-554]	0	3625.49	HexNAc(4)Hex(5)Fuc(1)NeuAc(2)	0	542	4.61	216.7	39.8	2.45756e-05	1.67737e-06	0	0	0.0796538	0.015625	0.0155979	0.0174419	High
High	[K].AAIPSALDTNSSK.[S]	1xHexNAc(4)Hex(5)Fuc(1)NeuAc(1) [N10]	1	Q08380	Q08380 [542-554]	0	3334.39	HexNAc(4)Hex(5)Fuc(1)NeuAc(1)	0	542	5.28	198.5	63	5.28213e-06	4.37405e-07	0	0	0.02018	0.006006	0.00598802	0.00655737	High
High	[K].AAIPSALDTNSSK.[S]	1xHexNAc(2)Hex(7) [N10]	1	Q08380	Q08380 [542-554]	0	2815.19	HexNAc(2)Hex(7)	0	542	5.76	223.1	108	1.74985e-06	2.00557e-07	0	0	0.00677556	0.000819271	0	0	High
High	[K].AAIPSALDTNSSK.[S]	1xHexNAc(2)Hex(10) [N10]	1	Q08380	Q08380 [542-554]	0	3301.35	HexNAc(2)Hex(10)	0	542	6.95	256.1	94	1.11878e-07	2.77657e-08	0	0	0.000395208	9.83442e-05	0	0	High
High	[K].AAIPSALDTNSSK.[S]	1xHexNAc(3)Hex(4)Fuc(1)NeuAc(1) [N10]	1	Q08380	Q08380 [542-554]	0	2969.26	HexNAc(3)Hex(4)Fuc(1)NeuAc(1)	0	542	7.04	281.7	124.4	9.06428e-08	2.41062e-08	0	0	0.000320217	8.53425e-05	0	0	High
High	[K].AAIPSALDTNSSK.[S]	1xHexNAc(5)Hex(6)Fuc(1)NeuAc(1) [N10]	1	Q08380	Q08380 [542-554]	0	3699.53	HexNAc(5)Hex(6)Fuc(1)NeuAc(1)	0	542	7.31	444.1	186.9	4.85666e-08	1.47974e-08	0	0	0.000171599	5.22214e-05	0	0	High
High	[K].AAIPSALDTNSSK.[S]	1xHexNAc(2)Hex(8) [N10]	1	Q08380	Q08380 [542-554]	0	2977.24	HexNAc(2)Hex(8)	0	542	7.44	358.2	197.1	3.62157e-08	1.43485e-08	0	0	0.000141156	5.72643e-05	0	0	High
High	[K].AAIPSALDTNSSK.[S]	1xHexNAc(2)Hex(9) [N10]	1	Q08380	Q08380 [542-554]	0	3139.29	HexNAc(2)Hex(9)	0	542	7.61	457.9	282.3	2.47163e-08	6.66556e-09	0	0	8.73365e-05	2.36753e-05	0	0	High
High	[K].AANGSLR.[A]	1xHexNAc(2)Hex(9) [N3]	1	P11279	P11279 [320-326]	0	2553.01	HexNAc(2)Hex(9)	0	320	5.37	287.1	56.8	4.23885e-06	5.12263e-07	0	0	0.0147585	0.00677201	0.00598802	0.00672646	High
High	[K].AASMNHTK.[A]	1xHexNAc(2)Hex(9) [N5]	1	Q9UBV2	Q9UBV2 [213-220]	0	2724.04	HexNAc(2)Hex(9)	0	213	1.53	154.4	67.9	0.0295008	0.00483092	0.00481348	0.00595238	0.0368734	0.00736648	0.00725953	0.00811359	High
High	[K].AFNSTLPTMAQMEK.[A]	1xHexNAc(5)Hex(6)Fuc(1)NeuAc(2) [N3]; 1xOxidation [M9]	1	P16070	P16070 [55-68]	0	4300.7	HexNAc(5)Hex(6)Fuc(1)NeuAc(2)	0	55	3.5	147.6	40	0.000314112	2.20142e-05	0	0	0.523442	0.092545	0.0924262	0.103896	High
High	[K].AFNSTLPTMAQMEK.[A]	1xHexNAc(5)Hex(7)Fuc(1)NeuAc(2) [N3]; 1xOxidation [M9]	1	P16070	P16070 [55-68]	0	4462.76	HexNAc(5)Hex(7)Fuc(1)NeuAc(2)	1	55	4.17	106.6	2	6.83294e-05	3.9369e-06	0	0	0.193536	0.0275081	0.0273752	0.0306859	High
High	[K].AFNSTLPTMAQMEK.[A]	1xHexNAc(6)Hex(7)Fuc(1)NeuAc(4) [N3]	1	P16070	P16070 [55-68]	0	5232.03	HexNAc(6)Hex(7)Fuc(1)NeuAc(4)	1	55	5.35	130.5	68.1	4.5073e-06	5.58547e-07	0	0	0.0156785	0.00677201	0.00590551	0.00662252	High
High	[K].AFNSTLPTMAQMEK.[A]	1xHexNAc(4)Hex(5)Fuc(1)NeuAc(2) [N3]; 1xOxidation [M12]	1	P16070	P16070 [55-68]	0	3935.57	HexNAc(4)Hex(5)Fuc(1)NeuAc(2)	0	55	5.52	271.6	61.5	3.03212e-06	2.83393e-07	0	0	0.0116833	0.00321543	0.00315457	0.00344827	High
High	[K].AFNSTLPTMAQMEK.[A]	1xHexNAc(6)Hex(7)NeuAc(3) [N3]; 1xOxidation [M9]	1	P16070	P16070 [55-68]	0	4810.87	HexNAc(6)Hex(7)NeuAc(3)	0	55	5.77	227.6	68	1.68684e-06	1.66234e-07	0	0	0.00592576	0.00478469	0.00468384	0.00522193	High
High	[K].AFNSTLPTMAQMEK.[A]	1xHexNAc(6)Hex(7)Fuc(1)NeuAc(3) [N3]; 1xOxidation [M12]	2	P16070	P16070 [55-68]	0	4956.93	HexNAc(6)Hex(7)Fuc(1)NeuAc(3)	0	55	6.76	245.4	86.5	1.73718e-07	3.65468e-08	0	0	0.000613522	0.000129521	0	0	High
High	[K].AFNSTLPTMAQMEK.[A]	1xHexNAc(5)Hex(6)NeuAc(2) [N3]	2	P16070	P16070 [55-68]	0	4138.65	HexNAc(5)Hex(6)NeuAc(2)	0	55	7.52	236.8	91.6	2.98688e-08	8.21312e-09	0	0	0.000105541	2.91635e-05	0	0	High
High	[K].AFNSTLPTMAQMEK.[A]	1xHexNAc(4)Hex(5)NeuAc(2) [N3]; 1xOxidation [M]	2	P16070	P16070 [55-68]	0	3789.51	HexNAc(4)Hex(5)NeuAc(2)	0	55	7.75	357.4	141.1	1.79799e-08	4.99056e-09	0	0	6.35345e-05	1.77328e-05	0	0	High
High	[K].AFNSTLPTMAQMEK.[A]	1xHexNAc(5)Hex(6)NeuAc(3) [N3]; 1xOxidation [M9]	2	P16070	P16070 [55-68]	0	4445.74	HexNAc(5)Hex(6)NeuAc(3)	0	55	8.09	440.1	246.7	8.04633e-09	2.2404e-09	0	0	2.84339e-05	7.96489e-06	0	0	High
High	[K].AFNSTLPTMAQMEK.[A]	1xHexNAc(5)Hex(6)Fuc(1)NeuAc(3) [N3]; 1xOxidation [M]	3	P16070	P16070 [55-68]	0	4591.8	HexNAc(5)Hex(6)Fuc(1)NeuAc(3)	0	55	8.18	474.8	278.6	6.58594e-09	1.7542e-09	0	0	2.32733e-05	6.23516e-06	0	0	High
High	[K].AMSSNETAAYK.[I]	1xHexNAc(2)Hex(9) [N5]	1	Q8TCJ2	Q8TCJ2 [637-647]	0	3037.16	HexNAc(2)Hex(9)	0	637	7.26	385.2	180.8	5.53056e-08	1.79058e-08	0	0	0.000195405	6.3293e-05	0	0	High
High	[K].ANIQFGDNGTTISAVSNK.[A]	1xHexNAc(7)Hex(8)NeuAc(1) [N8]	1	Q14108	Q14108 [98-115]	0	4845.98	HexNAc(7)Hex(8)NeuAc(1)	-1	98	1.55	152.1	81.8	0.0283396	0.00483092	0.00481928	0.00596125	0.141511	0.015625	0.0151515	0.0170455	High
High	[K].ANIQFGDNGTTISAVSNK.[A]	1xHexNAc(6)Hex(7)Fuc(1)NeuAc(3) [N8]	1	Q14108	Q14108 [98-115]	0	5209.1	HexNAc(6)Hex(7)Fuc(1)NeuAc(3)	0	98	2.78	191.8	109.9	0.00165008	0.000110086	0	0	0.00824187	0.00111441	0	0	High
High	[K].ANIQFGDNGTTISAVSNK.[A]	1xHexNAc(6)Hex(7)Fuc(1)NeuAc(2) [N8]	1	Q14108	Q14108 [98-115]	0	4918	HexNAc(6)Hex(7)Fuc(1)NeuAc(2)	1	98	2.87	175.4	85.9	0.00133942	0.00294551	0.00291971	0.00353357	0.00668947	0.00478469	0.00456621	0.00507614	High
High	[K].ANTTQPGIVEGGQVLK.[C]	1xHexNAc(4)Hex(5)Fuc(1)NeuAc(1) [N2]	1	P06756	P06756 [73-88]	0	3671.6	HexNAc(4)Hex(5)Fuc(1)NeuAc(1)	0	73	5.15	212.5	46.9	7.15178e-06	5.44716e-07	0	0	0.0271313	0.006006	0.0058309	0.00641025	High
High	[K].ANTTQPGIVEGGQVLK.[C]	1xHexNAc(2)Hex(8) [N2]	1	P06756	P06756 [73-88]	0	3314.45	HexNAc(2)Hex(8)	0	73	9.53	552.3	385.2	2.95774e-10	4.15712e-11	0	0	1.04523e-06	1.46907e-07	0	0	High
High	[K].CCGAANYTDWEK.[I]	2xCarbamidomethyl [C1; C2]; 1xHexNAc(9)Hex(10)Fuc(1) [N6]	1	P08962	P08962 [145-156]	0	5068.87	HexNAc(9)Hex(10)Fuc(1)	1	145	2.3	79.6	11.9	0.00495566	0.00407056	0.00396825	0.00486224	0.942221	0.3	0.298669	0.32573	High
High	[K].CCGAANYTDWEK.[I]	2xCarbamidomethyl [C1; C2]; 1xHexNAc(6)Hex(7)NeuAc(1) [N6]	1	P08962	P08962 [145-156]	0	4118.51	HexNAc(6)Hex(7)NeuAc(1)	1	145	2.96	106.3	0.5	0.00110813	6.16475e-05	0	0	0.809365	0.179971	0.17945	0.193396	High
High	[K].CCGAANYTDWEK.[I]	2xCarbamidomethyl [C1; C2]; 1xHexNAc(6)Hex(7)Fuc(1)NeuAc(1) [N6]	2	P08962	P08962 [145-156]	0	4264.57	HexNAc(6)Hex(7)Fuc(1)NeuAc(1)	1	145	5.2	146.8	68.7	6.31904e-06	6.79308e-07	0	0	0.021843	0.00677201	0.00578035	0.00646552	High
High	[K].CCGAANYTDWEK.[I]	2xCarbamidomethyl [C1; C2]; 1xHexNAc(5)Hex(6)Fuc(1)NeuAc(2) [N6]	2	P08962	P08962 [145-156]	0	4190.54	HexNAc(5)Hex(6)Fuc(1)NeuAc(2)	0	145	7.26	370.2	145.4	5.46993e-08	1.77636e-08	0	0	0.000193263	6.27868e-05	0	0	High
High	[K].CHEGNGTFECGACR.[C]	3xCarbamidomethyl [C1; C10; C13]; 1xHexNAc(7)Hex(8)NeuAc(1) [N5]	1	P05556	P05556 [477-490]	0	4663.69	HexNAc(7)Hex(8)NeuAc(1)	1	477	3.51	56.8	20.8	0.00030644	1.8e-05	0	0	0.517146	0.0757781	0.0754717	0.0852359	High
High	[K].CHEGNGTFECGACR.[C]	3xCarbamidomethyl [C1; C10; C13]; 1xHexNAc(5)Hex(5)Fuc(1)NeuAc(2) [N5]	1	P05556	P05556 [477-490]	0	4208.53	HexNAc(5)Hex(5)Fuc(1)NeuAc(2)	0	477	3.61	143.2	38.5	0.000244538	1.51126e-05	0	0	0.48579	0.0914077	0.0902527	0.0970297	High
High	[K].CHEGNGTFECGACR.[C]	3xCarbamidomethyl [C1; C10; C13]; 1xHexNAc(6)Hex(7)NeuAc(1) [N5]	2	P05556	P05556 [477-490]	0	4298.56	HexNAc(6)Hex(7)NeuAc(1)	0	477	7.46	369.2	240.7	3.48391e-08	1.35896e-08	0	0	0.000135791	5.42742e-05	0	0	High
High	[K].CHEGNGTFECGACR.[C]	3xCarbamidomethyl [C1; C10; C13]; 1xHexNAc(5)Hex(6)NeuAc(1) [N5]	1	P05556	P05556 [477-490]	0	3933.42	HexNAc(5)Hex(6)NeuAc(1)	0	477	7.96	387.5	265.6	1.08769e-08	2.94048e-09	0	0	3.84362e-05	1.04535e-05	0	0	High
High	[K].CHEGNGTFECGACR.[C]	3xCarbamidomethyl [C1; C10; C13]; 1xHexNAc(5)Hex(6)NeuAc(2) [N5]	2	P05556	P05556 [477-490]	0	4224.52	HexNAc(5)Hex(6)NeuAc(2)	0	477	8.34	465.4	331.8	4.61964e-09	1.16469e-09	0	0	1.63249e-05	4.135e-06	0	0	High
High	[K].CHEGNGTFECGACR.[C]	3xCarbamidomethyl [C1; C10; C13]; 1xHexNAc(6)Hex(7)NeuAc(2) [N5]	1	P05556	P05556 [477-490]	0	4589.65	HexNAc(6)Hex(7)NeuAc(2)	0	477	8.34	466.6	323.7	4.61964e-09	1.12754e-09	0	0	1.63249e-05	4.0025e-06	0	0	High
High	[K].CHEGNGTFECGACR.[C]	3xCarbamidomethyl [C1; C10; C13]; 1xHexNAc(2)Hex(9) [N5]	1	P05556	P05556 [477-490]	0	3519.25	HexNAc(2)Hex(9)	0	477	9.55	545.8	453.3	2.83805e-10	3.53711e-11	0	0	1.00293e-06	1.24997e-07	0	0	High
High	[K].CVNASR.[C]	1xCarbamidomethyl [C1]; 1xHexNAc(4)Hex(5)Fuc(1)NeuAc(2) [N3]	1	P21589	P21589 [51-56]	0	3057.16	HexNAc(4)Hex(5)Fuc(1)NeuAc(2)	0	51	2.31	195.9	21.8	0.00494844	0.00407056	0.00402685	0.00492611	0.942142	0.297089	0.296835	0.32364	High
High	[K].CVNASR.[C]	1xCarbamidomethyl [C1]; 1xHexNAc(4)Hex(5)Fuc(1)NeuAc(1) [N3]	1	P21589	P21589 [51-56]	0	2766.07	HexNAc(4)Hex(5)Fuc(1)NeuAc(1)	0	51	3.21	210.7	39.3	0.000613012	3.14336e-05	0	0	0.680881	0.111383	0.110976	0.124147	High
High	[K].DLDTDFTNNASQPETK.[A]	1xHexNAc(4)Hex(5)Fuc(1)NeuAc(2) [N9]	1	O75976	O75976 [1062-1077]	0	4146.63	HexNAc(4)Hex(5)Fuc(1)NeuAc(2)	0	1062	7.89	363.4	218	1.29764e-08	3.46718e-09	0	0	4.58549e-05	1.23247e-05	0	0	High
High	[K].DLVVQQAGTNK.[T]	1xHexNAc(4)Hex(5)Fuc(1)NeuAc(1) [N10]	1	P25942	P25942 [171-181]	0	3232.36	HexNAc(4)Hex(5)Fuc(1)NeuAc(1)	0	171	1.77	227.6	48.2	0.0169626	0.00892857	0.00877193	0.01002	0.0282661	0.006006	0.00578035	0.0063492	High
High	[K].DNATEEEILVYLEK.[T]	1xHexNAc(4)Hex(5)Fuc(1)NeuAc(2) [N2]	1	P07602	P07602 [79-92]	0	4016.65	HexNAc(4)Hex(5)Fuc(1)NeuAc(2)	1	79	3.63	60.6	11.9	0.000234407	1.55537e-05	0	0	0.450699	0.0601399	0.0600559	0.0679305	High
High	[K].DNATEEEILVYLEK.[T]	1xHexNAc(6)Hex(7)Fuc(1)NeuAc(3) [N2]	1	P07602	P07602 [79-92]	0	5038.01	HexNAc(6)Hex(7)Fuc(1)NeuAc(3)	0	79	5.28	99.3	50.4	5.21483e-06	6.27513e-07	0	0	0.0180952	0.00677201	0.00581395	0.00650759	High
High	[K].DNATEEEILVYLEK.[T]	1xHexNAc(5)Hex(6)Fuc(1)NeuAc(2) [N2]	2	P07602	P07602 [79-92]	0	4381.78	HexNAc(5)Hex(6)Fuc(1)NeuAc(2)	0	79	5.98	205.9	104.8	1.05331e-06	1.21881e-07	0	0	0.00370846	0.00246914	0.00243902	0.00271739	High
High	[K].DNATEEEILVYLEK.[T]	1xHexNAc(7)Hex(8)NeuAc(1) [N2]	1	P07602	P07602 [79-92]	0	4674.9	HexNAc(7)Hex(8)NeuAc(1)	0	79	6.06	176.6	97.5	8.73173e-07	1.05326e-07	0	0	0.00307619	0.00036233	0	0	High
High	[K].DNTTVTR.[L]	1xHexNAc(5)Hex(6)Fuc(1)NeuAc(1) [N2]	1	P11279	P11279 [248-254]	0	3231.27	HexNAc(5)Hex(6)Fuc(1)NeuAc(1)	0	248	2.06	189.3	6.6	0.00868621	0.00407056	0.00380711	0.0046875	0.966284	0.355348	0.355093	0.384375	High
High	[K].DNTTVTR.[L]	1xHexNAc(5)Hex(6)Fuc(1) [N2]	1	P11279	P11279 [248-254]	0	2940.17	HexNAc(5)Hex(6)Fuc(1)	0	248	2.3	179.3	18.9	0.00504613	0.00204499	0.00185529	0.00211416	0.950837	0.399466	0.398757	0.421698	High
High	[K].DNTTVTR.[L]	1xHexNAc(4)Hex(5)Fuc(1)NeuAc(2) [N2]	1	P11279	P11279 [248-254]	0	3157.23	HexNAc(4)Hex(5)Fuc(1)NeuAc(2)	0	248	4.43	275.7	28.7	3.68109e-05	2.32478e-06	0	0	0.114638	0.015625	0.0152542	0.0171756	High
High	[K].DNTTVTR.[L]	1xHexNAc(4)Hex(5)Fuc(1)NeuAc(1) [N2]	2	P11279	P11279 [248-254]	0	2866.14	HexNAc(4)Hex(5)Fuc(1)NeuAc(1)	0	248	5.08	267.6	49.8	8.40631e-06	7.96035e-07	0	0	0.02885	0.00677201	0.00564972	0.00631579	High
High	[K].DNTTVTR.[L]	1xHexNAc(5)Hex(6)Fuc(1)NeuAc(2) [N2]	1	P11279	P11279 [248-254]	0	3522.36	HexNAc(5)Hex(6)Fuc(1)NeuAc(2)	0	248	6.22	269.3	31.4	5.97333e-07	1.03457e-07	0	0	0.00232317	0.000414646	0	0	High
High	[K].DSLSINATNIK.[H]	1xHexNAc(2)Hex(8) [N6]	1	P00533	P00533 [347-357]	0	2878.21	HexNAc(2)Hex(8)	0	347	7.18	290.7	135.6	6.63461e-08	2.0189e-08	0	0	0.000234404	7.14166e-05	0	0	High
High	[K].DTCTQECSYFNITK.[V]	2xCarbamidomethyl [C3; C7]; 1xHexNAc(5)Hex(6)Fuc(1)NeuAc(1) [N11]	1	P05556	P05556 [659-672]	0	4191.6	HexNAc(5)Hex(6)Fuc(1)NeuAc(1)	1	659	5.25	212.2	97.3	5.56355e-06	6.46602e-07	0	0	0.0192819	0.00677201	0.00580271	0.00649351	High
High	[K].DTCTQECSYFNITK.[V]	2xCarbamidomethyl [C3; C7]; 1xHexNAc(5)Hex(6)Fuc(1)NeuAc(3) [N11]	1	P05556	P05556 [659-672]	0	4773.79	HexNAc(5)Hex(6)Fuc(1)NeuAc(3)	1	659	6.06	217.3	98.7	8.73173e-07	1.03434e-07	0	0	0.00307619	0.000355545	0	0	High
High	[K].DTCTQECSYFNITK.[V]	2xCarbamidomethyl [C3; C7]; 1xHexNAc(5)Hex(6)Fuc(1)NeuAc(2) [N11]	2	P05556	P05556 [659-672]	0	4482.7	HexNAc(5)Hex(6)Fuc(1)NeuAc(2)	0	659	7.44	244.2	96.2	3.60306e-08	1.05271e-08	0	0	0.000127311	3.69775e-05	0	0	High
High	[K].DTCTQECSYFNITK.[V]	2xCarbamidomethyl [C3; C7]; 1xHexNAc(4)Hex(5)Fuc(1)NeuAc(2) [N11]	2	P05556	P05556 [659-672]	0	4117.57	HexNAc(4)Hex(5)Fuc(1)NeuAc(2)	0	659	8.1	449.8	275.2	7.90286e-09	2.09117e-09	0	0	2.79269e-05	7.43418e-06	0	0	High
High	[K].DTCTQECSYFNITK.[V]	2xCarbamidomethyl [C3; C7]; 1xHexNAc(2)Hex(9) [N11]	1	P05556	P05556 [659-672]	0	3631.37	HexNAc(2)Hex(9)	0	659	8.78	557	346.5	1.66416e-09	3.79415e-10	0	0	5.88089e-06	1.32623e-06	0	0	High
High	[K].DTCTQECSYFNITK.[V]	2xCarbamidomethyl [C3; C7]; 1xHexNAc(4)Hex(5)Fuc(1)NeuAc(1) [N11]	1	P05556	P05556 [659-672]	0	3826.47	HexNAc(4)Hex(5)Fuc(1)NeuAc(1)	0	659	9.19	584.3	340.5	6.41612e-10	1.3042e-10	0	0	2.26737e-06	4.60885e-07	0	0	High
High	[K].EASQNITYICK.[N]	1xCarbamidomethyl [C10]; 1xHexNAc(2)Hex(9) [N5]	1	P05997	P05997 [1396-1406]	0	3191.27	HexNAc(2)Hex(9)	0	1396	6.65	253.3	55.6	2.23956e-07	5.74075e-08	0	0	0.000872272	0.000226613	0	0	High
High	[K].ENGTDTVQEEEESPAEGSK.[D]	1xHexNAc(2)Hex(8) [N2]	1	Q9Y4L1	Q9Y4L1 [595-613]	0	3738.44	HexNAc(2)Hex(8)	0	595	12.63	701.5	556.4	2.34259e-13	4.65194e-14	0	0	9.13189e-10	1.81342e-10	0	0	High
High	[K].ENGTDTVQEEEESPAEGSK.[D]	1xHexNAc(2)Hex(7) [N2]	1	Q9Y4L1	Q9Y4L1 [595-613]	0	3576.39	HexNAc(2)Hex(7)	0	595	14.04	762.5	593.6	9.21088e-15	1.83871e-15	0	0	3.25501e-11	6.49778e-12	0	0	High
High	[K].ENGTDTVQEEEESPAEGSK.[D]	1xHexNAc(2)Hex(6) [N2]	1	Q9Y4L1	Q9Y4L1 [595-613]	0	3414.33	HexNAc(2)Hex(6)	0	595	14.95	835.8	677	1.1111e-15	2.24807e-16	0	0	3.9265e-12	7.94439e-13	0	0	High
High	[K].ENQNHSYSLK.[S]	1xHexNAc(2)Hex(8) [N4]	1	P06756	P06756 [942-951]	0	2922.15	HexNAc(2)Hex(8)	0	942	2.86	225.4	27.5	0.00136719	0.00294551	0.00291121	0.00352113	0.824115	0.133492	0.132388	0.147757	High
High	[K].ENQNHSYSLK.[S]	1xHexNAc(2)Hex(9) [N4]	1	P06756	P06756 [942-951]	0	3084.2	HexNAc(2)Hex(9)	0	942	6.51	250.9	70.2	3.11973e-07	6.9283e-08	0	0	0.00121467	0.000273262	0	0	High
High	[K].ENSSEICSNNGECVCGQCVCR.[K]	5xCarbamidomethyl [C7; C13; C15; C18; C20]; 1xHexNAc(2)Hex(7) [N2]	1	P05556	P05556 [519-539]	0	4059.48	HexNAc(2)Hex(7)	0	519	5.99	161.8	68.6	1.02487e-06	1.40789e-07	0	0	0.00397943	0.000569585	0	0	High
High	[K].ENSSEICSNNGECVCGQCVCR.[K]	5xCarbamidomethyl [C7; C13; C15; C18; C20]; 1xHexNAc(2)Hex(9) [N2]	1	P05556	P05556 [519-539]	0	4383.58	HexNAc(2)Hex(9)	0	519	8.19	285.9	177.5	6.50371e-09	1.70904e-09	0	0	2.29827e-05	6.07442e-06	0	0	High
High	[K].ENSSEICSNNGECVCGQCVCR.[K]	5xCarbamidomethyl [C7; C13; C15; C18; C20]; 1xHexNAc(2)Hex(8) [N2]	2	P05556	P05556 [519-539]	0	4221.53	HexNAc(2)Hex(8)	0	519	8.43	380.1	259	3.69097e-09	7.81508e-10	0	0	1.30432e-05	2.76691e-06	0	0	High
High	[K].ENTSDPSLVIAFGR.[G]	1xHexNAc(5)Hex(5)NeuAc(1) [N2]	1	P11279	P11279 [83-96]	0	3622.52	HexNAc(5)Hex(5)NeuAc(1)	0	83	1.18	142.3	11.2	0.0655488	0.00937866	0.00933489	0.0115274	0.994348	0.459527	0.458375	0.483146	High
High	[K].ENTSDPSLVIAFGR.[G]	1xHexNAc(6)Hex(7)Fuc(1)NeuAc(2) [N2]	1	P11279	P11279 [83-96]	0	4586.85	HexNAc(6)Hex(7)Fuc(1)NeuAc(2)	0	83	2.96	82.1	11.6	0.00108404	5.04045e-05	0	0	0.805804	0.172414	0.170877	0.184466	High
High	[K].ENTSDPSLVIAFGR.[G]	1xHexNAc(7)Hex(8)Fuc(1)NeuAc(2) [N2]	1	P11279	P11279 [83-96]	0	4951.99	HexNAc(7)Hex(8)Fuc(1)NeuAc(2)	1	83	3.51	105.4	9.4	0.000309358	2.02312e-05	0	0	0.51956	0.0810093	0.0805812	0.0909091	High
High	[K].ENTSDPSLVIAFGR.[G]	1xHexNAc(6)Hex(7)Fuc(1)NeuAc(1) [N2]	1	P11279	P11279 [83-96]	0	4295.76	HexNAc(6)Hex(7)Fuc(1)NeuAc(1)	1	83	3.73	85	9	0.000187239	1.36584e-05	0	0	0.396179	0.0567376	0.0565771	0.0637958	High
High	[K].ENTSDPSLVIAFGR.[G]	1xHexNAc(8)Hex(9) [N2]	1	P11279	P11279 [83-96]	0	4588.87	HexNAc(8)Hex(9)	1	83	4.19	128.8	36	6.48892e-05	3.38629e-06	0	0	0.185619	0.0214876	0.0211726	0.023766	High
High	[K].ENTSDPSLVIAFGR.[G]	1xHexNAc(7)Hex(8)NeuAc(1) [N2]	2	P11279	P11279 [83-96]	0	4514.83	HexNAc(7)Hex(8)NeuAc(1)	0	83	4.29	105.4	10.8	5.13066e-05	2.79933e-06	0	0	0.152771	0.0183028	0.0182421	0.0204842	High
High	[K].ENTSDPSLVIAFGR.[G]	1xHexNAc(5)Hex(6)Fuc(1)NeuAc(3) [N2]	1	P11279	P11279 [83-96]	0	4512.82	HexNAc(5)Hex(6)Fuc(1)NeuAc(3)	1	83	5.07	138	38.2	8.56412e-06	8.08086e-07	0	0	0.032318	0.006006	0.00555555	0.00609756	High
High	[K].ENTSDPSLVIAFGR.[G]	1xHexNAc(4)Hex(5)Fuc(1)NeuAc(1) [N2]	1	P11279	P11279 [83-96]	0	3565.49	HexNAc(4)Hex(5)Fuc(1)NeuAc(1)	0	83	5.36	167.3	48.5	4.33126e-06	5.5057e-07	0	0	0.0150754	0.00677201	0.00591716	0.00663717	High
High	[K].ENTSDPSLVIAFGR.[G]	1xHexNAc(5)Hex(6)Fuc(1)NeuAc(2) [N2]	1	P11279	P11279 [83-96]	0	4221.72	HexNAc(5)Hex(6)Fuc(1)NeuAc(2)	0	83	5.77	228	65.4	1.6901e-06	1.73305e-07	0	0	0.00593713	0.00478469	0.004662	0.0051948	High
High	[K].ENTSDPSLVIAFGR.[G]	1xHexNAc(4)Hex(5)Fuc(1)NeuAc(2) [N2]	2	P11279	P11279 [83-96]	0	3856.59	HexNAc(4)Hex(5)Fuc(1)NeuAc(2)	0	83	5.85	206.2	62.9	1.40105e-06	1.32702e-07	0	0	0.00492675	0.00246914	0.00240385	0.0026738	High
High	[K].ENTSDPSLVIAFGR.[G]	1xHexNAc(6)Hex(7)Fuc(1)NeuAc(3) [N2]	2	P11279	P11279 [83-96]	0	4877.95	HexNAc(6)Hex(7)Fuc(1)NeuAc(3)	0	83	7.75	341.8	214.7	1.7793e-08	4.74037e-09	0	0	6.28741e-05	1.68449e-05	0	0	High
High	[K].FEEGSFANSTDQEPTR.[P]	1xHexNAc(4)Hex(5)Fuc(1)NeuAc(2) [N8]	1	Q702N8	Q702N8 [130-145]	0	4165.61	HexNAc(4)Hex(5)Fuc(1)NeuAc(2)	1	130	2.04	162.8	43.7	0.00904699	0.00407056	0.00379747	0.0046729	0.0150754	0.00677201	0.00595238	0.00668151	High
High	[K].GENFTETDVK.[M]	1xHexNAc(4)Hex(5)Fuc(1)NeuAc(2) [N3]	1	P04156	P04156 [195-204]	0	3490.35	HexNAc(4)Hex(5)Fuc(1)NeuAc(2)	0	195	2.83	252.9	10	0.0014664	9.78911e-05	0	0	0.00732444	0.000961422	0	0	High
High	[K].GGNLPPVSPNDSGAK.[I]	1xHexNAc(4)Hex(5)Fuc(1)NeuAc(2) [N10]	1	Q9UK61	Q9UK61 [1096-1110]	0	3760.53	HexNAc(4)Hex(5)Fuc(1)NeuAc(2)	0	1096	2.77	234.3	9	0.00168796	0.000113313	0	0	0.00843107	0.00113801	0	0	High
High	[K].GLNLTEDTYKPR.[I]	1xHexNAc(5)Hex(6)Fuc(1)NeuAc(2) [N3]	1	Q08380	Q08380 [396-407]	0	4122.69	HexNAc(5)Hex(6)Fuc(1)NeuAc(2)	1	396	4.35	187.2	48	4.48232e-05	3.27435e-06	0	0	0.148278	0.0348837	0.0348028	0.0382653	High
High	[K].GLNLTEDTYKPR.[I]	1xHexNAc(4)Hex(5)Fuc(1)NeuAc(2) [N3]	1	Q08380	Q08380 [396-407]	0	3757.56	HexNAc(4)Hex(5)Fuc(1)NeuAc(2)	0	396	6.38	275	55.7	4.21471e-07	5.72683e-08	0	0	0.00148721	0.000197581	0	0	High
High	[K].GLNLTEDTYKPR.[I]	1xHexNAc(5)Hex(6)Fuc(1)NeuAc(3) [N3]	2	Q08380	Q08380 [396-407]	0	4413.79	HexNAc(5)Hex(6)Fuc(1)NeuAc(3)	0	396	6.67	374.1	159.3	2.12139e-07	4.1209e-08	0	0	0.00074911	0.000146066	0	0	High
High	[K].GQTEIQVNCPPAVTENK.[T]	1xCarbamidomethyl [C9]; 1xHexNAc(4)Hex(7)NeuAc(1) [N16]	1	Q16563	Q16563 [56-72]	0	4122.69	HexNAc(4)Hex(7)NeuAc(1)	1	56	2.58	156.5	28.7	0.00263659	0.00294551	0.00277392	0.003367	0.899001	0.24548	0.245247	0.26911	High
High	[K].GQTEIQVNCPPAVTENK.[T]	1xCarbamidomethyl [C9]; 1xHexNAc(4)Hex(5)Fuc(1)NeuAc(2) [N16]	1	Q16563	Q16563 [56-72]	0	4235.74	HexNAc(4)Hex(5)Fuc(1)NeuAc(2)	0	56	3.47	71.8	23.6	0.000336344	2.43021e-05	0	0	0.540472	0.0979644	0.0974683	0.109531	High
High	[K].GQTEIQVNCPPAVTENK.[T]	1xCarbamidomethyl [C9]; 1xHexNAc(2)Hex(9) [N16]	1	Q16563	Q16563 [56-72]	0	3749.55	HexNAc(2)Hex(9)	0	56	7.01	323.5	173.2	9.87598e-08	2.87142e-08	0	0	0.000384838	0.000113817	0	0	High
High	[K].GQTEIQVNCPPAVTENK.[T]	1xCarbamidomethyl [C9]; 1xHexNAc(3)Hex(6) [N16]	1	Q16563	Q16563 [56-72]	0	3466.47	HexNAc(3)Hex(6)	0	56	7.54	253.6	133.3	2.85768e-08	7.40565e-09	0	0	0.000100977	2.63001e-05	0	0	High
High	[K].GQTEIQVNCPPAVTENK.[T]	1xCarbamidomethyl [C9]; 1xHexNAc(2)Hex(6) [N16]	1	Q16563	Q16563 [56-72]	0	3263.39	HexNAc(2)Hex(6)	0	56	7.57	396.9	269.6	2.70489e-08	1.04632e-08	0	0	0.000105431	4.19339e-05	0	0	High
High	[K].GQTEIQVNCPPAVTENK.[T]	1xCarbamidomethyl [C9]; 1xHexNAc(3)Hex(5)NeuAc(1) [N16]	1	Q16563	Q16563 [56-72]	0	3595.51	HexNAc(3)Hex(5)NeuAc(1)	0	56	8.5	554.5	337.2	3.17207e-09	7.13985e-10	0	0	1.12096e-05	2.52548e-06	0	0	High
High	[K].GQTEIQVNCPPAVTENK.[T]	1xCarbamidomethyl [C9]; 1xHexNAc(2)Hex(7) [N16]	1	Q16563	Q16563 [56-72]	0	3425.44	HexNAc(2)Hex(7)	0	56	13.04	707.6	561.2	9.21088e-14	1.19762e-14	0	0	3.25501e-10	4.23224e-11	0	0	High
High	[K].GQTEIQVNCPPAVTENK.[T]	1xCarbamidomethyl [C9]; 1xHexNAc(3)Hex(6)NeuAc(1) [N16]	2	Q16563	Q16563 [56-72]	0	3757.56	HexNAc(3)Hex(6)NeuAc(1)	0	56	13.04	717.5	463.7	9.21088e-14	1.73183e-14	0	0	3.25501e-10	6.12008e-11	0	0	High
High	[K].GSLSYLNVTR.[K]	1xHexNAc(4)Hex(5)Fuc(1)NeuAc(2) [N7]	1	P07339	P07339 [257-266]	0	3460.43	HexNAc(4)Hex(5)Fuc(1)NeuAc(2)	0	257	1.24	159.3	9.4	0.0571336	0.0083632	0.00820633	0.0101449	0.993632	0.448731	0.447368	0.472177	High
High	[K].GSLSYLNVTR.[K]	1xHexNAc(6)Hex(7)Fuc(1)NeuAc(3) [N7]	1	P07339	P07339 [257-266]	0	4481.79	HexNAc(6)Hex(7)Fuc(1)NeuAc(3)	1	257	1.32	62.9	5.2	0.0476688	0.0083632	0.00826446	0.0102339	0.992527	0.443981	0.44375	0.46882	High
High	[K].GSLSYLNVTR.[K]	1xHexNAc(2)Hex(5) [N7]	1	P07339	P07339 [257-266]	0	2326.02	HexNAc(2)Hex(5)	0	257	2.68	106.2	9.3	0.00207284	0.00294551	0.00282087	0.00339559	0.875366	0.199582	0.199166	0.220046	High
High	[K].GSLSYLNVTR.[K]	1xHexNAc(2)Hex(10) [N7]	1	P07339	P07339 [257-266]	0	3136.28	HexNAc(2)Hex(10)	0	257	2.96	47.2	6.7	0.00110032	5.49106e-05	0	0	0.808225	0.175258	0.173977	0.187599	High
High	[K].GSLSYLNVTR.[K]	1xHexNAc(7)Hex(8)Fuc(1)NeuAc(4) [N7]	1	P07339	P07339 [257-266]	0	5138.01	HexNAc(7)Hex(8)Fuc(1)NeuAc(4)	1	257	3.98	222.7	85.2	0.000104232	8.16223e-06	0	0	0.288018	0.0608519	0.060241	0.0638766	High
High	[K].GSLSYLNVTR.[K]	1xHexNAc(2)Hex(6) [N7]	1	P07339	P07339 [257-266]	0	2488.07	HexNAc(2)Hex(6)	0	257	4.96	124	73.1	1.08963e-05	1.09444e-06	0	0	0.0370786	0.00736648	0.00723327	0.00809716	High
High	[K].GSLSYLNVTR.[K]	1xHexNAc(2)Hex(9) [N7]	1	P07339	P07339 [257-266]	0	2974.23	HexNAc(2)Hex(9)	0	257	5.13	148.4	38.8	7.45951e-06	6.49113e-07	0	0	0.0282661	0.006006	0.005698	0.00626959	High
High	[K].GSLSYLNVTR.[K]	1xHexNAc(2)Hex(4) [N7]	1	P07339	P07339 [257-266]	0	2163.96	HexNAc(2)Hex(4)	0	257	5.75	184.9	113.4	1.76735e-06	2.1633e-07	0	0	0.00684287	0.000899629	0	0	High
High	[K].GSLSYLNVTR.[K]	1xHexNAc(2)Hex(3) [N7]	1	P07339	P07339 [257-266]	0	2001.91	HexNAc(2)Hex(3)	0	257	6.79	369.7	124.8	1.60469e-07	4.67591e-08	0	0	0.000625155	0.000184779	0	0	High
High	[K].GSLSYLNVTR.[K]	1xHexNAc(2)Hex(1) [N7]	1	P07339	P07339 [257-266]	0	1677.81	HexNAc(2)Hex(1)	0	257	7.17	462.1	227.2	6.80629e-08	2.27238e-08	0	0	0.000265253	9.02152e-05	0	0	High
High	[K].GSLSYLNVTR.[K]	1xHexNAc(2)Hex(8) [N7]	1	P07339	P07339 [257-266]	0	2812.18	HexNAc(2)Hex(8)	0	257	7.64	441.9	206.3	2.30993e-08	6.36196e-09	0	0	8.16233e-05	2.25984e-05	0	0	High
High	[K].GSLSYLNVTR.[K]	1xHexNAc(2)Hex(7) [N7]	1	P07339	P07339 [257-266]	0	2650.12	HexNAc(2)Hex(7)	0	257	7.75	463.9	231.5	1.79444e-08	4.90783e-09	0	0	6.34093e-05	1.74392e-05	0	0	High
High	[K].GYPCGGNK.[T]	1xCarbamidomethyl [C4]; 1xHexNAc(5)Hex(6)Fuc(1)NeuAc(3) [N7]	1	P11717	P11717 [2079-2086]	0	3859.42	HexNAc(5)Hex(6)Fuc(1)NeuAc(3)	0	2079	2.56	87.7	8.2	0.00276843	0.00204499	0.00201613	0.00229885	0.91334	0.277228	0.275862	0.295364	High
High	[K].GYPCGGNK.[T]	1xHexNAc(5)Hex(6)Fuc(1)NeuAc(2) [N7]; 1xCarbamidomethyl [C4]	1	P11717	P11717 [2079-2086]	0	3568.33	HexNAc(5)Hex(6)Fuc(1)NeuAc(2)	0	2079	3.16	125	7.8	0.000691319	3.54891e-05	0	0	0.72621	0.141694	0.140777	0.151943	High
High	[K].GYPCGGNK.[T]	1xCarbamidomethyl [C4]; 1xHexNAc(5)Hex(6)Fuc(1)NeuAc(1) [N7]	1	P11717	P11717 [2079-2086]	0	3277.23	HexNAc(5)Hex(6)Fuc(1)NeuAc(1)	0	2079	3.82	132.2	11.5	0.000150023	8.80878e-06	0	0	0.344687	0.0409712	0.0406015	0.0459184	High
High	[K].GYPCGGNK.[T]	1xCarbamidomethyl [C4]; 1xHexNAc(4)Hex(5)Fuc(1)NeuAc(1) [N7]	2	P11717	P11717 [2079-2086]	0	2912.1	HexNAc(4)Hex(5)Fuc(1)NeuAc(1)	0	2079	6.55	241.4	77.1	2.82978e-07	4.78607e-08	0	0	0.000999008	0.000167424	0	0	High
High	[K].GYPCGGNK.[T]	1xCarbamidomethyl [C4]; 1xHexNAc(4)Hex(5)Fuc(1)NeuAc(2) [N7]	2	P11717	P11717 [2079-2086]	0	3203.2	HexNAc(4)Hex(5)Fuc(1)NeuAc(2)	0	2079	7.28	272.8	87.4	5.24496e-08	1.62137e-08	0	0	0.000185316	5.72681e-05	0	0	High
High	[K].HLLENSTASVSEAER.[K]	1xHexNAc(7)Hex(8) [N5]	1	P42892	P42892 [162-176]	0	4360.78	HexNAc(7)Hex(8)	0	162	3.12	76.9	10.1	0.000750187	4.28843e-05	0	0	0.742068	0.1518	0.150855	0.162988	High
High	[K].HLLENSTASVSEAER.[K]	1xHexNAc(2)Hex(8) [N5]	1	P42892	P42892 [162-176]	0	3345.38	HexNAc(2)Hex(8)	0	162	5.69	225	102.7	2.03679e-06	2.49921e-07	0	0	0.00787797	0.00109127	0	0	High
High	[K].HTNMNLTQLK.[V]	1xHexNAc(2)Hex(8) [N5]	1	Q15165	Q15165 [250-259]	0	2902.2	HexNAc(2)Hex(8)	0	250	7.5	366.2	135.2	3.16666e-08	8.68232e-09	0	0	0.000111893	3.08271e-05	0	0	High
High	[K].INENETLYENNECGK.[P]	1xCarbamidomethyl [C13]; 1xHexNAc(4)Hex(5)Fuc(1)NeuAc(2) [N4]	1	Q9UJW8	Q9UJW8 [239-253]	0	4177.62	HexNAc(4)Hex(5)Fuc(1)NeuAc(2)	1	239	1.59	192	40.6	0.0258561	0.00892857	0.00848896	0.00968992	0.032318	0.006006	0.00558659	0.00613497	High
High	[K].ISSLQTTEKNDTVAGQGER.[D]	1xHexNAc(4)Hex(5)Fuc(1)NeuAc(1) [N10]	2	P06756	P06756 [865-883]	1	4093.74	HexNAc(4)Hex(5)Fuc(1)NeuAc(1)	0	865	4.17	198.3	115.3	6.82762e-05	3.60555e-06	0	0	0.193415	0.0243902	0.0243506	0.0273224	High
High	[K].ISSLQTTEKNDTVAGQGER.[D]	1xHexNAc(6)Hex(7)Fuc(1)NeuAc(2) [N10]	1	P06756	P06756 [865-883]	1	5115.1	HexNAc(6)Hex(7)Fuc(1)NeuAc(2)	1	865	4.27	135.9	103.4	5.31272e-05	3.76844e-06	0	0	0.171013	0.0368664	0.0366133	0.040201	High
High	[K].ISSLQTTEKNDTVAGQGER.[D]	1xHexNAc(6)Hex(7)Fuc(1)NeuAc(3) [N10]	1	P06756	P06756 [865-883]	1	5406.2	HexNAc(6)Hex(7)Fuc(1)NeuAc(3)	0	865	6.12	248.9	194.8	7.56418e-07	8.93031e-08	0	0	0.00266596	0.000298525	0	0	High
High	[K].ISSLQTTEKNDTVAGQGER.[D]	1xHexNAc(5)Hex(6)Fuc(1)NeuAc(3) [N10]	1	P06756	P06756 [865-883]	1	5041.07	HexNAc(5)Hex(6)Fuc(1)NeuAc(3)	1	865	6.47	333.7	273.3	3.41927e-07	7.35675e-08	0	0	0.00133114	0.000290091	0	0	High
High	[K].ISSLQTTEKNDTVAGQGER.[D]	1xHexNAc(5)Hex(6)Fuc(1)NeuAc(1) [N10]	1	P06756	P06756 [865-883]	1	4458.88	HexNAc(5)Hex(6)Fuc(1)NeuAc(1)	0	865	7.01	421.6	288.6	9.81777e-08	2.59392e-08	0	0	0.000346827	9.18558e-05	0	0	High
High	[K].ISSLQTTEKNDTVAGQGER.[D]	1xHexNAc(2)Hex(8) [N10]	1	P06756	P06756 [865-883]	1	3736.59	HexNAc(2)Hex(8)	0	865	7.54	463.3	345.1	2.90357e-08	7.7517e-09	0	0	0.000102598	2.75274e-05	0	0	High
High	[K].ISSLQTTEKNDTVAGQGER.[D]	1xHexNAc(5)Hex(6)Fuc(1)NeuAc(2) [N10]	1	P06756	P06756 [865-883]	1	4749.97	HexNAc(5)Hex(6)Fuc(1)NeuAc(2)	0	865	7.71	565.6	361.4	1.93349e-08	5.39049e-09	0	0	7.53656e-05	2.17223e-05	0	0	High
High	[K].ISSLQTTEKNDTVAGQGER.[D]	1xHexNAc(4)Hex(5)Fuc(1)NeuAc(2) [N10]	2	P06756	P06756 [865-883]	1	4384.84	HexNAc(4)Hex(5)Fuc(1)NeuAc(2)	1	865	9.05	588.3	482.3	9.01064e-10	2.00059e-10	0	0	3.18423e-06	6.78483e-07	0	0	High
High	[K].ITPNVTFCDENAK.[E]	1xCarbamidomethyl [C8]; 1xHexNAc(4)Hex(4)Fuc(1)NeuAc(1) [N4]	1	Q96QE5	Q96QE5 [43-55]	0	3406.39	HexNAc(4)Hex(4)Fuc(1)NeuAc(1)	0	43	2.25	239.8	2.3	0.00559563	0.00407056	0.0039267	0.00480769	0.0111881	0.00677201	0.00634249	0.00707547	High
High	[K].KDTCTQECSYFNITK.[V]	2xCarbamidomethyl [C4; C8]; 1xHexNAc(6)Hex(7)Fuc(1)NeuAc(1) [N12]	1	P05556	P05556 [658-672]	1	4684.83	HexNAc(6)Hex(7)Fuc(1)NeuAc(1)	1	658	6.88	229.3	149.6	1.30889e-07	3.15275e-08	0	0	0.000462332	0.000111703	0	0	High
High	[K].KDTCTQECSYFNITK.[V]	2xCarbamidomethyl [C4; C8]; 1xHexNAc(6)Hex(7)Fuc(1)NeuAc(2) [N12]	1	P05556	P05556 [658-672]	1	4975.93	HexNAc(6)Hex(7)Fuc(1)NeuAc(2)	0	658	7.16	398.4	294.8	6.92922e-08	2.0861e-08	0	0	0.00024481	7.38066e-05	0	0	High
High	[K].KDTCTQECSYFNITK.[V]	2xCarbamidomethyl [C4; C8]; 1xHexNAc(6)Hex(7)Fuc(1)NeuAc(3) [N12]	1	P05556	P05556 [658-672]	1	5267.02	HexNAc(6)Hex(7)Fuc(1)NeuAc(3)	0	658	7.36	280.4	228	4.36246e-08	1.69023e-08	0	0	0.000170029	6.73157e-05	0	0	High
High	[K].KDTCTQECSYFNITK.[V]	2xCarbamidomethyl [C4; C8]; 1xHexNAc(5)Hex(6)Fuc(1)NeuAc(2) [N12]	2	P05556	P05556 [658-672]	1	4610.79	HexNAc(5)Hex(6)Fuc(1)NeuAc(2)	0	658	7.46	249.5	99	3.45726e-08	9.65546e-09	0	0	0.00012216	3.3859e-05	0	0	High
High	[K].KDTCTQECSYFNITK.[V]	2xCarbamidomethyl [C4; C8]; 1xHexNAc(4)Hex(5)Fuc(1)NeuAc(1) [N12]	2	P05556	P05556 [658-672]	1	3954.57	HexNAc(4)Hex(5)Fuc(1)NeuAc(1)	0	658	7.71	327.5	137	1.96482e-08	5.33405e-09	0	0	6.94295e-05	1.89517e-05	0	0	High
High	[K].KDTCTQECSYFNITK.[V]	2xCarbamidomethyl [C4; C8]; 1xHexNAc(5)Hex(6)Fuc(1)NeuAc(1) [N12]	2	P05556	P05556 [658-672]	1	4319.7	HexNAc(5)Hex(6)Fuc(1)NeuAc(1)	0	658	8.01	424.1	250.9	9.69027e-09	2.50823e-09	0	0	3.4243e-05	8.91713e-06	0	0	High
High	[K].KDTCTQECSYFNITK.[V]	2xCarbamidomethyl [C4; C8]; 1xHexNAc(4)Hex(5)Fuc(1)NeuAc(2) [N12]	2	P05556	P05556 [658-672]	1	4245.66	HexNAc(4)Hex(5)Fuc(1)NeuAc(2)	0	658	8.05	451.8	314	8.91521e-09	2.44936e-09	0	0	3.15042e-05	8.70783e-06	0	0	High
High	[K].KDTCTQECSYFNITK.[V]	2xCarbamidomethyl [C4; C8]; 1xHexNAc(5)Hex(6)Fuc(1)NeuAc(3) [N12]	1	P05556	P05556 [658-672]	1	4901.89	HexNAc(5)Hex(6)Fuc(1)NeuAc(3)	1	658	8.32	426.5	348.7	4.76388e-09	1.20257e-09	0	0	1.68346e-05	4.2701e-06	0	0	High
High	[K].LDNYSTQELGK.[T]	1xHexNAc(4)Hex(5)Fuc(1)NeuAc(2) [N3]	1	P21589	P21589 [331-341]	0	3618.45	HexNAc(4)Hex(5)Fuc(1)NeuAc(2)	0	331	3.51	178.2	20.1	0.00031171	2.11219e-05	0	0	0.521488	0.0835509	0.0833333	0.0938416	High
High	[K].LDNYSTQELGK.[T]	1xHexNAc(4)Hex(5)Fuc(1) [N3]	1	P21589	P21589 [331-341]	0	3036.26	HexNAc(4)Hex(5)Fuc(1)	0	331	3.51	120.1	11.3	0.000310318	2.05353e-05	0	0	0.544892	0.110526	0.110333	0.119002	High
High	[K].LDNYSTQELGK.[T]	1xHexNAc(7)Hex(8)Fuc(1)NeuAc(1) [N3]	1	P21589	P21589 [331-341]	0	4422.75	HexNAc(7)Hex(8)Fuc(1)NeuAc(1)	1	331	3.51	94	11.8	0.000310318	1.98752e-05	0	0	0.544892	0.108963	0.108772	0.117308	High
High	[K].LDNYSTQELGK.[T]	1xHexNAc(6)Hex(7)Fuc(1)NeuAc(1) [N3]	1	P21589	P21589 [331-341]	0	4057.62	HexNAc(6)Hex(7)Fuc(1)NeuAc(1)	0	331	5.84	250	78.8	1.44641e-06	1.71957e-07	0	0	0.00560714	0.000690257	0	0	High
High	[K].LDNYSTQELGK.[T]	1xHexNAc(6)Hex(7)Fuc(1) [N3]	1	P21589	P21589 [331-341]	0	3766.52	HexNAc(6)Hex(7)Fuc(1)	0	331	6.82	297.9	84.8	1.51344e-07	3.38195e-08	0	0	0.000534544	0.00011984	0	0	High
High	[K].LDNYSTQELGK.[T]	1xHexNAc(5)Hex(6)Fuc(1)NeuAc(2) [N3]	1	P21589	P21589 [331-341]	0	3983.58	HexNAc(5)Hex(6)Fuc(1)NeuAc(2)	0	331	7.12	321	121.2	7.66993e-08	2.16153e-08	0	0	0.000270972	7.64884e-05	0	0	High
High	[K].LDNYSTQELGK.[T]	1xHexNAc(5)Hex(6)Fuc(1)NeuAc(1) [N3]	1	P21589	P21589 [331-341]	0	3692.48	HexNAc(5)Hex(6)Fuc(1)NeuAc(1)	0	331	7.46	334.6	112.7	3.43486e-08	1.33999e-08	0	0	0.00013388	5.35263e-05	0	0	High
High	[K].LDNYSTQELGK.[T]	1xHexNAc(4)Hex(5)Fuc(1)NeuAc(1) [N3]	1	P21589	P21589 [331-341]	0	3327.35	HexNAc(4)Hex(5)Fuc(1)NeuAc(1)	0	331	7.63	488.1	226.9	2.3311e-08	6.45937e-09	0	0	8.23713e-05	2.29439e-05	0	0	High
High	[K].LGIYADVGNK.[T]	1xHexNAc(5)Hex(6)Fuc(1)NeuAc(3) [N9]	1	P06280	P06280 [131-140]	0	4056.62	HexNAc(5)Hex(6)Fuc(1)NeuAc(3)	1	131	4.11	213.8	11	7.69744e-05	5.67934e-06	0	0	0.230044	0.0457516	0.0446808	0.0488372	High
High	[K].LGIYADVGNK.[T]	1xHexNAc(4)Hex(5)Fuc(1)NeuAc(2) [N9]	1	P06280	P06280 [131-140]	0	3400.39	HexNAc(4)Hex(5)Fuc(1)NeuAc(2)	0	131	7.07	331.8	79	8.57365e-08	2.32269e-08	0	0	0.00030289	8.22177e-05	0	0	High
High	[K].LGPNDNDTVR.[G]	1xHexNAc(5)Hex(6)NeuAc(2) [N6]; 1xDeamidated [N4]	1	Q9HAU4	Q9HAU4 [120-129]	0	3671.42	HexNAc(5)Hex(6)NeuAc(2)	0	120	3.26	261.9	35.7	0.000552666	2.96951e-05	0	0	0.0027602	0.000328987	0	0	High
High	[K].LIDNNK.[T]	1xHexNAc(2)Hex(5) [N5]	1	P07602	P07602 [328-333]	0	1932.82	HexNAc(2)Hex(5)	0	328	1.98	155.3	1.8	0.0105057	0.00407056	0.00375	0.00461538	0.971835	0.380348	0.379447	0.405559	High
High	[K].LIDNNK.[T]	1xHexNAc(5)Hex(6)Fuc(1)NeuAc(2) [N5]	1	P07602	P07602 [328-333]	0	3432.36	HexNAc(5)Hex(6)Fuc(1)NeuAc(2)	0	328	2.31	206.7	14.6	0.00494844	0.00407056	0.00400534	0.00490196	0.942142	0.297089	0.295068	0.321828	High
High	[K].LIDNNK.[T]	1xHexNAc(5)Hex(6)Fuc(1)NeuAc(3) [N5]	1	P07602	P07602 [328-333]	0	3723.45	HexNAc(5)Hex(6)Fuc(1)NeuAc(3)	0	328	2.31	211.8	1.8	0.00494844	0.00407056	0.00401069	0.00490998	0.942142	0.297089	0.295319	0.322129	High
High	[K].LIDNNK.[T]	1xHexNAc(1) [N5]	1	P07602	P07602 [328-333]	0	919.473	HexNAc(1)	0	328	2.41	285.1	14.6	0.00389163	0.00204499	0.00190114	0.0021645	0.937125	0.378119	0.377756	0.400409	High
High	[K].LIDNNK.[T]	1xHexNAc(5)Hex(6)Fuc(1)NeuAc(1) [N5]	1	P07602	P07602 [328-333]	0	3141.26	HexNAc(5)Hex(6)Fuc(1)NeuAc(1)	0	328	2.47	197.7	14.6	0.00342293	0.00294551	0.00273224	0.0033389	0.91962	0.254902	0.253235	0.278287	High
High	[K].LIDNNK.[T]	1xHexNAc(2)Rev1 [N5]	1	P07602	P07602 [328-333]	0	1122.55	HexNAc(2)	0	328	3.86	232.1	14.6	0.000137192	7.69586e-06	0	0	0.324831	0.0357143	0.0351682	0.0396552	High
High	[K].LIDNNK.[T]	1xHexNAc(4)Hex(5)Fuc(1)NeuAc(2) [N5]	1	P07602	P07602 [328-333]	0	3067.22	HexNAc(4)Hex(5)Fuc(1)NeuAc(2)	0	328	4.3	236	14.6	4.96322e-05	3.39444e-06	0	0	0.161593	0.0348837	0.0347222	0.0381679	High
High	[K].LIDNNK.[T]	1xHexNAc(2)Hex(6) [N5]	1	P07602	P07602 [328-333]	0	2094.87	HexNAc(2)Hex(6)	0	328	5.03	255.1	14.6	9.22836e-06	8.73681e-07	0	0	0.0315821	0.00677201	0.00558659	0.00625	High
High	[K].LIDNNKTEK.[E]	1xHexNAc(4)Hex(5)Fuc(1)NeuAc(2) [N5]	1	P07602	P07602 [328-336]	1	3425.41	HexNAc(4)Hex(5)Fuc(1)NeuAc(2)	0	328	4.04	285	15.9	9.0539e-05	5.22771e-06	0	0	0.24117	0.0302548	0.0298742	0.0335689	High
High	[K].LIDNNKTEK.[E]	1xHexNAc(5)Hex(6)Fuc(1)NeuAc(2) [N5]	1	P07602	P07602 [328-336]	1	3790.54	HexNAc(5)Hex(6)Fuc(1)NeuAc(2)	0	328	4.19	248.7	5.3	6.51522e-05	4.07558e-06	0	0	0.201872	0.0425056	0.0423162	0.0464548	High
High	[K].LIDNNKTEK.[E]	1xHexNAc(5)Hex(6)Fuc(1)NeuAc(3) [N5]	1	P07602	P07602 [328-336]	1	4081.64	HexNAc(5)Hex(6)Fuc(1)NeuAc(3)	0	328	4.89	268.3	61.4	1.28282e-05	1.09494e-06	0	0	0.0476513	0.018617	0.0184697	0.0202898	High
High	[K].LNYTLSQGHR.[V]	1xHexNAc(2)Hex(8) [N2]	1	P15144	P15144 [127-136]	0	2891.19	HexNAc(2)Hex(8)	0	127	7.42	346	118.9	3.81993e-08	1.17282e-08	0	0	0.000134973	4.12707e-05	0	0	High
High	[K].LVNASVAFYK.[T]	1xHexNAc(5)Hex(5)NeuAc(1) [N3]	1	O75962	O75962 [1009-1018]	0	3228.37	HexNAc(5)Hex(5)NeuAc(1)	0	1009	3.7	113.3	18.2	0.000200032	1.36749e-05	0	0	0.436205	0.0844037	0.0842491	0.0905432	High
High	[K].MNFTGGDTCHK.[V]	1xCarbamidomethyl [C9]; 1xHexNAc(2)Hex(9) [N2]	1	P11717	P11717 [1311-1321]	0	3132.15	HexNAc(2)Hex(9)	0	1311	7.24	304	197.5	5.71035e-08	1.84778e-08	0	0	0.000201756	6.53288e-05	0	0	High
High	[K].MNFTGGDTCHK.[V]	1xCarbamidomethyl [C9]; 1xHexNAc(2)Hex(8) [N2]	1	P11717	P11717 [1311-1321]	0	2970.1	HexNAc(2)Hex(8)	0	1311	7.27	369.5	139.3	5.357e-08	1.7206e-08	0	0	0.000189274	6.08019e-05	0	0	High
High	[K].NANGSYTCEECDSSCVGCTGEGPGNCK.[E]	5xCarbamidomethyl [C8; C11; C15; C18; C26]; 1xHexNAc(2)Hex(6) [N3]	1	Q6UXH1	Q6UXH1 [249-275]	0	4348.55	HexNAc(2)Hex(6)	0	249	2.17	134.5	105.8	0.00672734	0.00407056	0.00387097	0.00475436	0.0112101	0.00677201	0.00632911	0.00705882	High
High	[K].NATLAEQAK.[L]	1xHexNAc(2)Hex(6) [N1]	1	Q9Y4L1	Q9Y4L1 [869-877]	0	2323.98	HexNAc(2)Hex(6)	0	869	4.09	143.6	55	8.21357e-05	4.54436e-06	0	0	0.223828	0.0302548	0.0301587	0.0338078	High
High	[K].NATLAEQAK.[L]	1xHexNAc(2)Hex(7) [N1]	1	Q9Y4L1	Q9Y4L1 [869-877]	0	2486.03	HexNAc(2)Hex(7)	0	869	6.33	389.8	160.1	4.70395e-07	8.94561e-08	0	0	0.00183037	0.000352471	0	0	High
High	[K].NATLAEQAK.[L]	1xHexNAc(2)Hex(9) [N1]	1	Q9Y4L1	Q9Y4L1 [869-877]	0	2810.13	HexNAc(2)Hex(9)	0	869	7.43	342.6	161	3.68245e-08	1.12477e-08	0	0	0.000130116	3.95536e-05	0	0	High
High	[K].NATLAEQAK.[L]	1xHexNAc(2)Hex(8) [N1]	1	Q9Y4L1	Q9Y4L1 [869-877]	0	2648.08	HexNAc(2)Hex(8)	0	869	7.97	509.3	252.2	1.06484e-08	2.87896e-09	0	0	3.76286e-05	1.02349e-05	0	0	High
High	[K].NATSYPPMCTQDPK.[A]	1xCarbamidomethyl [C9]; 1xHexNAc(2)Hex(9) [N1]; 1xDeamidated [Q11]	1	P23141	P23141 [79-92]	0	3475.32	HexNAc(2)Hex(9)	0	79	1.58	165	59.9	0.0261577	0.00407056	0.00362319	0.00447761	0.0326948	0.00677201	0.00556586	0.006237	High
High	[K].NGSLFAFR.[G]	1xHexNAc(3)Hex(6)NeuAc(1) [N1]	1	P04004	P04004 [169-176]	0	2784.12	HexNAc(3)Hex(6)NeuAc(1)	0	169	7.28	266.6	112	5.24496e-08	1.6499e-08	0	0	0.000185316	5.82843e-05	0	0	High
High	[K].NGTPPMRK.[A]	1xHexNAc(7)Hex(6)Fuc(1)NeuAc(4) [N1]	1	O75533	O75533 [506-513]	1	4604.78	HexNAc(7)Hex(6)Fuc(1)NeuAc(4)	1	506	2.23	53.3	8	0.00591959	0.00407056	0.00391645	0.00479233	0.951212	0.323089	0.322581	0.351119	High
High	[K].NGVNGTGENGR.[K]	1xHexNAc(2)Hex(7) [N4]	1	P05556	P05556 [403-413]	0	2615.02	HexNAc(2)Hex(7)	0	403	2.91	101.2	12.8	0.00122584	7.99729e-05	0	0	0.824856	0.235762	0.235139	0.252857	High
High	[K].NGVNGTGENGR.[K]	1xHexNAc(5)Hex(6)NeuAc(1) [N4]	1	P05556	P05556 [403-413]	0	3353.3	HexNAc(5)Hex(6)NeuAc(1)	0	403	5.55	268.6	41.2	2.79856e-06	3.00554e-07	0	0	0.00979292	0.00677201	0.00646552	0.00721154	High
High	[K].NGVNGTGENGR.[K]	1xHexNAc(2)Hex(8) [N4]	1	P05556	P05556 [403-413]	0	2777.07	HexNAc(2)Hex(8)	0	403	5.79	276.4	90.6	1.61813e-06	1.55635e-07	0	0	0.00568574	0.00478469	0.00472813	0.00527704	High
High	[K].NGVNGTGENGR.[K]	1xHexNAc(4)Hex(5)Fuc(1)NeuAc(1) [N4]	1	P05556	P05556 [403-413]	0	3134.23	HexNAc(4)Hex(5)Fuc(1)NeuAc(1)	0	403	5.83	250.2	55.4	1.47984e-06	1.38915e-07	0	0	0.00520236	0.00246914	0.00239234	0.00266667	High
High	[K].NGVNGTGENGR.[K]	1xHexNAc(5)Hex(6)Fuc(1)NeuAc(2) [N4]; 1xDeamidated [N1]	1	P05556	P05556 [403-413]	0	3791.44	HexNAc(5)Hex(6)Fuc(1)NeuAc(2)	0	403	6.26	234.9	37.4	5.5385e-07	6.42347e-08	0	0	0.00195341	0.00021401	0	0	High
High	[K].NGVNGTGENGR.[K]	1xDeamidated [N1]; 1xHexNAc(5)Hex(6)Fuc(1) [N4]	1	P05556	P05556 [403-413]	0	3209.25	HexNAc(5)Hex(6)Fuc(1)	0	403	7.06	380.1	89.6	8.78253e-08	2.36588e-08	0	0	0.000310267	8.37527e-05	0	0	High
High	[K].NGVNGTGENGR.[K]	1xHexNAc(5)Hex(6)Fuc(1)NeuAc(1) [N4]	1	P05556	P05556 [403-413]	0	3499.36	HexNAc(5)Hex(6)Fuc(1)NeuAc(1)	0	403	7.36	426	161.6	4.38192e-08	1.30378e-08	0	0	0.000154827	4.59461e-05	0	0	High
High	[K].NGVNGTGENGR.[K]	1xHexNAc(2)Hex(9) [N4]	1	P05556	P05556 [403-413]	0	2939.13	HexNAc(2)Hex(9)	0	403	7.44	454.7	165.1	3.64555e-08	1.11282e-08	0	0	0.000128812	3.91264e-05	0	0	High
High	[K].NITIVTGAPR.[H]	1xHexNAc(4)Hex(5)Fuc(1)NeuAc(2) [N1]	1	P26006	P26006 [265-274]	0	3392.44	HexNAc(4)Hex(5)Fuc(1)NeuAc(2)	0	265	2.1	9.6	2.4	0.00785893	0.00407056	0.00382166	0.00470219	0.96285	0.345468	0.344444	0.373786	High
High	[K].NITIVTGAPR.[H]	1xHexNAc(6)Hex(8)Fuc(1)NeuAc(1) [N1]	1	P26006	P26006 [265-274]	0	3993.66	HexNAc(6)Hex(8)Fuc(1)NeuAc(1)	0	265	2.1	26.6	3.6	0.00785893	0.00407056	0.00382653	0.00470958	0.96285	0.345468	0.344955	0.374392	High
High	[K].NITIVTGAPR.[H]	1xHexNAc(6)Hex(7)NeuAc(3) [N1]	1	P26006	P26006 [265-274]	0	4267.74	HexNAc(6)Hex(7)NeuAc(3)	1	265	2.68	93.9	1.4	0.00210211	0.00204499	0.0020284	0.00230947	0.889274	0.253485	0.252844	0.271117	High
High	[K].NITIVTGAPR.[H]	1xHexNAc(5)Hex(6)NeuAc(2) [N1]	1	P26006	P26006 [265-274]	0	3611.51	HexNAc(5)Hex(6)NeuAc(2)	0	265	2.69	61.9	17	0.00205648	0.00294551	0.00282885	0.00340715	0.874529	0.18896	0.18836	0.208431	High
High	[K].NITIVTGAPR.[H]	1xHexNAc(5)Hex(7)Fuc(1)NeuAc(2) [N1]	1	P26006	P26006 [265-274]	0	3919.62	HexNAc(5)Hex(7)Fuc(1)NeuAc(2)	0	265	2.82	98.9	2.2	0.0015173	0.00294551	0.00286123	0.00345423	0.838449	0.177489	0.177297	0.196172	High
High	[K].NITIVTGAPR.[H]	1xHexNAc(4)Hex(5)Fuc(1)NeuAc(1) [N1]	1	P26006	P26006 [265-274]	0	3101.34	HexNAc(4)Hex(5)Fuc(1)NeuAc(1)	0	265	2.86	168.4	12.4	0.00138004	0.00294551	0.00289436	0.0034965	0.825444	0.145143	0.144482	0.160556	High
High	[K].NITIVTGAPR.[H]	1xHexNAc(3)Hex(6)NeuAc(1) [N1]	1	P26006	P26006 [265-274]	0	2914.26	HexNAc(3)Hex(6)NeuAc(1)	0	265	3.82	168.4	5.2	0.000150023	9.4954e-06	0	0	0.344687	0.0433483	0.0432836	0.0489039	High
High	[K].NITIVTGAPR.[H]	1xHexNAc(5)Hex(6)NeuAc(1) [N1]	1	P26006	P26006 [265-274]	0	3320.41	HexNAc(5)Hex(6)NeuAc(1)	0	265	5.13	230.6	58.7	7.45951e-06	5.86823e-07	0	0	0.0282661	0.006006	0.00576369	0.00632911	High
High	[K].NITIVTGAPR.[H]	1xHexNAc(4)Hex(5)NeuAc(1) [N1]	1	P26006	P26006 [265-274]	0	2955.28	HexNAc(4)Hex(5)NeuAc(1)	0	265	7.52	324.5	144.1	3.05269e-08	8.44467e-09	0	0	0.000107867	2.99845e-05	0	0	High
High	[K].NITIVTGAPR.[H]	1xHexNAc(4)Hex(5)NeuAc(2) [N1]	1	P26006	P26006 [265-274]	0	3246.38	HexNAc(4)Hex(5)NeuAc(2)	0	265	7.53	378.9	162.9	2.96025e-08	7.98416e-09	0	0	0.0001046	2.83517e-05	0	0	High
High	[K].NITIVTGAPR.[H]	1xHexNAc(5)Hex(6)NeuAc(3) [N1]	2	P26006	P26006 [265-274]	0	3902.61	HexNAc(5)Hex(6)NeuAc(3)	0	265	7.53	390	163.1	2.96025e-08	8.09854e-09	0	0	0.0001046	2.87572e-05	0	0	High
High	[K].NKNVTNR.[S]	1xHexNAc(5)Hex(6)Fuc(1)NeuAc(2) [N3]	1	P05556	P05556 [92-98]	1	3561.42	HexNAc(5)Hex(6)Fuc(1)NeuAc(2)	0	92	1.7	189.3	21.1	0.0200393	0.00892857	0.00863558	0.00986193	0.987001	0.482066	0.479549	0.502229	High
High	[K].NLNNSQSDVVSFR.[L]	1xHexNAc(6)Hex(7)Fuc(1)NeuAc(4) [N3]	1	P08648	P08648 [771-783]	0	5143	HexNAc(6)Hex(7)Fuc(1)NeuAc(4)	0	771	3.79	177.2	103.7	0.000163279	1.09316e-05	0	0	0.364013	0.045858	0.045388	0.0511551	High
High	[K].NLTLR.[C]	1xHexNAc(4)Hex(5)Fuc(1)NeuAc(2) [N1]	1	P05362	P05362 [130-134]	0	2967.21	HexNAc(4)Hex(5)Fuc(1)NeuAc(2)	0	130	1.58	199.3	29.4	0.0261384	0.00407056	0.00362757	0.0044843	0.987496	0.413655	0.413242	0.438188	High
High	[K].NLTLR.[C]	1xHexNAc(7)Hex(8)Fuc(1)NeuAc(3) [N1]	1	P05362	P05362 [130-134]	0	4353.7	HexNAc(7)Hex(8)Fuc(1)NeuAc(3)	1	130	1.59	126.3	12.7	0.0256509	0.00407056	0.00363636	0.00449775	0.987293	0.409251	0.407818	0.432957	High
High	[K].NLTLR.[C]	1xHexNAc(5)Hex(6)NeuAc(2) [N1]	1	P05362	P05362 [130-134]	0	3186.28	HexNAc(5)Hex(6)NeuAc(2)	0	130	2.25	158	2	0.00560597	0.00204499	0.00183486	0.00209644	0.955543	0.415966	0.414716	0.438332	High
High	[K].NLTLR.[C]	1xHexNAc(7)Hex(8)Fuc(1)NeuAc(2) [N1]	1	P05362	P05362 [130-134]	0	4062.6	HexNAc(7)Hex(8)Fuc(1)NeuAc(2)	0	130	2.31	212	29.1	0.00494844	0.00407056	0.00399467	0.00488599	0.942142	0.297089	0.295763	0.322491	High
High	[K].NLTLR.[C]	1xHexNAc(11)Hex(11)NeuAc(1) [N1]	1	P05362	P05362 [130-134]	0	4923.93	HexNAc(11)Hex(11)NeuAc(1)	1	130	2.35	40.5	5.8	0.00450478	0.00204499	0.00187266	0.00212766	0.945235	0.395564	0.392175	0.414894	High
High	[K].NLTLR.[C]	1xHexNAc(6)Hex(7)Fuc(1)NeuAc(1) [N1]	1	P05362	P05362 [130-134]	0	3406.38	HexNAc(6)Hex(7)Fuc(1)NeuAc(1)	0	130	4.93	249.4	25.6	1.16568e-05	1.19134e-06	0	0	0.0395624	0.0089928	0.00892857	0.01	High
High	[K].NLTLR.[C]	1xHexNAc(5)Hex(6)Fuc(1)NeuAc(3) [N1]	2	P05362	P05362 [130-134]	0	3623.44	HexNAc(5)Hex(6)Fuc(1)NeuAc(3)	0	130	4.97	253.9	33.2	1.06002e-05	1.05773e-06	0	0	0.0361073	0.00736648	0.00727273	0.00813008	High
High	[K].NLTLR.[C]	1xHexNAc(6)Hex(7)Fuc(1)NeuAc(3) [N1]	2	P05362	P05362 [130-134]	0	3988.57	HexNAc(6)Hex(7)Fuc(1)NeuAc(3)	0	130	5.37	267.7	52.2	4.25232e-06	5.19881e-07	0	0	0.0148047	0.00677201	0.00597609	0.00671141	High
High	[K].NLTLR.[C]	1xHexNAc(6)Hex(7)Fuc(1)NeuAc(2) [N1]	1	P05362	P05362 [130-134]	0	3697.47	HexNAc(6)Hex(7)Fuc(1)NeuAc(2)	0	130	5.43	291.2	43.7	3.75454e-06	4.23613e-07	0	0	0.0130943	0.00677201	0.00614754	0.00686499	High
High	[K].NLTLR.[C]	1xHexNAc(5)Hex(6)Fuc(1)NeuAc(2) [N1]	2	P05362	P05362 [130-134]	0	3332.34	HexNAc(5)Hex(6)Fuc(1)NeuAc(2)	0	130	5.88	266.5	46	1.31925e-06	1.29668e-07	0	0	0.00464044	0.00246914	0.00241546	0.00268817	High
High	[K].NLTLR.[C]	1xHexNAc(5)Hex(6)Fuc(1)NeuAc(1) [N1]	2	P05362	P05362 [130-134]	0	3041.24	HexNAc(5)Hex(6)Fuc(1)NeuAc(1)	0	130	6.34	295.9	63	4.54547e-07	5.93335e-08	0	0	0.00160374	0.00020497	0	0	High
High	[K].NLTVCPDGALFEQK.[G]	1xCarbamidomethyl [C5]; 1xDeamidated [Q13]; 1xHexNAc(6)Hex(7) [N1]	1	P54709	P54709 [124-137]	0	3945.61	HexNAc(6)Hex(7)	0	124	5.77	161	73.8	1.6901e-06	1.69778e-07	0	0	0.00593713	0.00478469	0.0046729	0.00520833	High
High	[K].NLTVCPDGALFEQK.[G]	1xCarbamidomethyl [C5]; 1xHexNAc(4)Hex(5)Fuc(1)NeuAc(2) [N1]	1	P54709	P54709 [124-137]	0	3942.61	HexNAc(4)Hex(5)Fuc(1)NeuAc(2)	0	124	6.75	230.3	41	1.78367e-07	3.69614e-08	0	0	0.000629928	0.000130993	0	0	High
High	[K].NMSFVNDLTVTQDGR.[K]	1xHexNAc(2)Hex(8) [N1]; 1xOxidation [M2]	1	Q9HDC9	Q9HDC9 [196-210]	0	3415.37	HexNAc(2)Hex(8)	0	196	7.32	295	148.5	4.83127e-08	1.94371e-08	0	0	0.000188297	7.72843e-05	0	0	High
High	[K].NMTFDLPSDATVVLNR.[S]	1xHexNAc(2)Hex(5) [N1]; 1xHexNAc(4)Hex(3)NeuAc(1) [N15]	1	P11279	P11279 [62-77]	0	4598.88	HexNAc(2)Hex(5); HexNAc(4)Hex(3)NeuAc(1)	1	62	2.14	44.5	2.4	0.00727786	0.00407056	0.00384615	0.00473186	0.95999	0.340909	0.339879	0.369942	High
High	[K].NMTFDLPSDATVVLNR.[S]	1xHexNAc(2)Hex(7) [N15]; 1xOxidation [M2]; 1xHexNAc(2)Hex(3)Fuc(1) [N1]	1	P11279	P11279 [62-77]	0	4387.79	HexNAc(2)Hex(3)Fuc(1); HexNAc(2)Hex(7)	1	62	3.51	75.7	4.3	0.000309504	2.06755e-05	0	0	0.519679	0.0814717	0.0813648	0.091716	High
High	[K].NMTFDLPSDATVVLNR.[S]	1xHexNAc(2)Hex(8) [N15]; 1xOxidation [M2]; 1xHexNAc(2)Hex(6) [N1]	1	P11279	P11279 [62-77]	0	4889.94	HexNAc(2)Hex(6); HexNAc(2)Hex(8)	0	62	5.36	134.9	39.9	4.33126e-06	5.42917e-07	0	0	0.0150754	0.00677201	0.00592885	0.00665188	High
High	[K].NMTISR.[G]	1xHexNAc(5)Hex(6)Fuc(1)NeuAc(2) [N1]	1	P06756	P06756 [554-559]	0	3437.33	HexNAc(5)Hex(6)Fuc(1)NeuAc(2)	0	554	1.42	228	13.4	0.0382289	0.00600961	0.00598802	0.00739645	0.990884	0.422535	0.422297	0.447194	High
High	[K].NNHTASILDR.[M]	1xHexNAc(2)Hex(9) [N2]	1	P08962	P08962 [129-138]	0	3005.21	HexNAc(2)Hex(9)	0	129	2.85	206.3	10.9	0.00142714	0.00294551	0.0028777	0.00347826	0.830144	0.158784	0.158605	0.17625	High
High	[K].NNHTASILDR.[M]	1xHexNAc(6)Hex(7)Fuc(1)NeuAc(1) [N2]	2	P08962	P08962 [129-138]	0	3930.57	HexNAc(6)Hex(7)Fuc(1)NeuAc(1)	0	129	2.85	226.7	3.9	0.00142714	0.00294551	0.00287356	0.00347222	0.830144	0.158784	0.158427	0.17603	High
High	[K].NNHTASILDR.[M]	1xHexNAc(8)Hex(9)Fuc(1) [N2]	1	P08962	P08962 [129-138]	0	4369.74	HexNAc(8)Hex(9)Fuc(1)	0	129	3.34	210.9	55.1	0.000453624	2.58087e-05	0	0	0.635721	0.122867	0.122658	0.13271	High
High	[K].NNHTASILDR.[M]	1xHexNAc(7)Hex(8) [N2]	1	P08962	P08962 [129-138]	0	3858.55	HexNAc(7)Hex(8)	0	129	3.45	140.6	66.7	0.000353938	2.57524e-05	0	0	0.55305	0.0983606	0.0981132	0.110169	High
High	[K].NNHTASILDR.[M]	1xHexNAc(7)Hex(8)Fuc(1)NeuAc(4) [N2]	1	P08962	P08962 [129-138]	0	5168.99	HexNAc(7)Hex(8)Fuc(1)NeuAc(4)	0	129	4.07	125.8	33	8.58186e-05	5.08433e-06	0	0	0.231526	0.0302548	0.0299213	0.0336283	High
High	[K].NNHTASILDR.[M]	1xHexNAc(5)Hex(6)Fuc(1) [N2]	1	P08962	P08962 [129-138]	0	3274.35	HexNAc(5)Hex(6)Fuc(1)	0	129	4.15	217.7	54.4	7.03723e-05	4.24471e-06	0	0	0.214561	0.0425056	0.0421286	0.0462287	High
High	[K].NNHTASILDR.[M]	1xHexNAc(2)Hex(7) [N2]	1	P08962	P08962 [129-138]	0	2681.1	HexNAc(2)Hex(7)	0	129	5.66	244.7	29.7	2.19065e-06	2.24486e-07	0	0	0.007682	0.00677201	0.00672646	0.00748129	High
High	[K].NNHTASILDR.[M]	1xHexNAc(5)Hex(6)Fuc(1)NeuAc(2) [N2]	1	P08962	P08962 [129-138]	0	3856.54	HexNAc(5)Hex(6)Fuc(1)NeuAc(2)	0	129	5.74	240.5	6.2	1.81599e-06	1.88137e-07	0	0	0.00637657	0.00478469	0.00461894	0.00514139	High
High	[K].NNHTASILDR.[M]	1xHexNAc(2)Hex(8) [N2]	1	P08962	P08962 [129-138]	0	2843.16	HexNAc(2)Hex(8)	0	129	6.39	296.8	49.2	4.06376e-07	8.51942e-08	0	0	0.00158165	0.000335741	0	0	High
High	[K].NNHTASILDR.[M]	1xHexNAc(6)Hex(7)Fuc(1) [N2]	1	P08962	P08962 [129-138]	0	3639.48	HexNAc(6)Hex(7)Fuc(1)	0	129	6.59	270.9	65.8	2.59766e-07	4.59684e-08	0	0	0.000917138	0.000162952	0	0	High
High	[K].NNHTASILDR.[M]	1xHexNAc(5)Hex(6)Fuc(1)NeuAc(1) [N2]	2	P08962	P08962 [129-138]	0	3565.44	HexNAc(5)Hex(6)Fuc(1)NeuAc(1)	0	129	6.65	280.8	112.3	2.22184e-07	4.27271e-08	0	0	0.000784555	0.000151453	0	0	High
High	[K].NNHTASILDR.[M]	1xHexNAc(4)Hex(5)NeuAc(2) [N2]	1	P08962	P08962 [129-138]	0	3345.35	HexNAc(4)Hex(5)NeuAc(2)	0	129	6.68	304.4	38.5	2.0673e-07	5.45815e-08	0	0	0.000805234	0.000215511	0	0	High
High	[K].NNHTASILDR.[M]	1xHexNAc(7)Hex(8)Fuc(1)NeuAc(3) [N2]	1	P08962	P08962 [129-138]	0	4877.9	HexNAc(7)Hex(8)Fuc(1)NeuAc(3)	0	129	6.93	398.9	164.4	1.16827e-07	3.47481e-08	0	0	0.000455208	0.000137568	0	0	High
High	[K].NNHTASILDR.[M]	1xHexNAc(7)Hex(8)Fuc(1)NeuAc(2) [N2]	2	P08962	P08962 [129-138]	0	4586.8	HexNAc(7)Hex(8)Fuc(1)NeuAc(2)	0	129	6.97	372.2	161.3	1.07716e-07	2.69673e-08	0	0	0.000380511	9.55081e-05	0	0	High
High	[K].NNHTASILDR.[M]	1xHexNAc(6)Hex(7)Fuc(1)NeuAc(3) [N2]	2	P08962	P08962 [129-138]	0	4512.77	HexNAc(6)Hex(7)Fuc(1)NeuAc(3)	0	129	7.02	390.2	165.6	9.54102e-08	2.52399e-08	0	0	0.000337054	8.93713e-05	0	0	High
High	[K].NNHTASILDR.[M]	1xHexNAc(6)Hex(7)Fuc(1)NeuAc(2) [N2]	3	P08962	P08962 [129-138]	0	4221.67	HexNAc(6)Hex(7)Fuc(1)NeuAc(2)	0	129	7.08	426.4	207	8.37528e-08	2.28062e-08	0	0	0.000295884	8.07221e-05	0	0	High
High	[K].NNHTASILDR.[M]	1xHexNAc(7)Hex(8)Fuc(1) [N2]	2	P08962	P08962 [129-138]	0	4004.61	HexNAc(7)Hex(8)Fuc(1)	0	129	7.12	404.2	191.5	7.64324e-08	2.14227e-08	0	0	0.000270029	7.58036e-05	0	0	High
High	[K].NNHTASILDR.[M]	1xHexNAc(7)Hex(8)Fuc(1)NeuAc(1) [N2]	2	P08962	P08962 [129-138]	0	4295.71	HexNAc(7)Hex(8)Fuc(1)NeuAc(1)	0	129	7.27	313.7	87.3	5.36034e-08	1.76226e-08	0	0	0.000189391	6.2285e-05	0	0	High
High	[K].NNHTASILDR.[M]	1xHexNAc(5)Hex(6)Fuc(1)NeuAc(3) [N2]	2	P08962	P08962 [129-138]	0	4147.63	HexNAc(5)Hex(6)Fuc(1)NeuAc(3)	0	129	7.29	336	103.7	5.13706e-08	1.57843e-08	0	0	0.000181504	5.57385e-05	0	0	High
High	[K].NNHTASILDR.[M]	1xHexNAc(4)Hex(5)Fuc(1)NeuAc(1) [N2]	1	P08962	P08962 [129-138]	0	3200.31	HexNAc(4)Hex(5)Fuc(1)NeuAc(1)	0	129	7.44	418.2	110	3.61344e-08	1.07698e-08	0	0	0.000127678	3.78451e-05	0	0	High
High	[K].NNHTASILDR.[M]	1xHexNAc(4)Hex(5)Fuc(1)NeuAc(2) [N2]	3	P08962	P08962 [129-138]	0	3491.41	HexNAc(4)Hex(5)Fuc(1)NeuAc(2)	0	129	7.6	442.7	150.2	2.49435e-08	7.07007e-09	0	0	8.81392e-05	2.51099e-05	0	0	High
High	[K].NNSIPDK.[Q]	1xHexNAc(2)Hex(9) [N1]	2	Q08431	Q08431 [238-244]	0	2652.03	HexNAc(2)Hex(9)	0	238	2.09	195.9	92.5	0.00809702	0.00727273	0.00725953	0.00828157	0.0202346	0.006006	0.00597015	0.00653595	High
High	[K].NQTAEK.[E]	1xHexNAc(11)Hex(11)NeuAc(1) [N1]	1	P11142	P11142 [584-589]	0	4997.89	HexNAc(11)Hex(11)NeuAc(1)	1	584	1.72	63.7	1.3	0.0190598	0.00407056	0.00366748	0.00453172	0.983549	0.400981	0.398907	0.423906	High
High	[K].NQTR.[E]	1xHexNAc(4)Hex(5)Fuc(1)NeuAc(2) [N1]	1	P05362	P05362 [385-388]	0	2869.1	HexNAc(4)Hex(5)Fuc(1)NeuAc(2)	0	385	1.33	154	7.5	0.0465526	0.0083632	0.00830368	0.0102639	0.992368	0.440232	0.439537	0.464045	High
High	[K].NQTR.[E]	1xHexNAc(4)Hex(5)NeuAc(2) [N1]	1	P05362	P05362 [385-388]	0	2723.04	HexNAc(4)Hex(5)NeuAc(2)	0	385	2.25	194.8	6.1	0.00560597	0.00204499	0.00184162	0.00210084	0.955543	0.414201	0.412458	0.435714	High
High	[K].NSSVEAFK.[R]	1xHexNAc(5)Hex(6)Fuc(1)NeuAc(3) [N1]	1	P42892	P42892 [632-639]	0	3888.49	HexNAc(5)Hex(6)Fuc(1)NeuAc(3)	0	632	4.11	230.3	34.2	7.79016e-05	6.03635e-06	0	0	0.23217	0.0506329	0.0504202	0.0550459	High
High	[K].NSSVEAFK.[R]	1xHexNAc(5)Hex(6)Fuc(1)NeuAc(2) [N1]	1	P42892	P42892 [632-639]	0	3597.4	HexNAc(5)Hex(6)Fuc(1)NeuAc(2)	0	632	6.17	234.6	37.2	6.80396e-07	1.09582e-07	0	0	0.00264538	0.000438504	0	0	High
High	[K].NSSVEAFK.[R]	1xHexNAc(6)Hex(7)Fuc(1)NeuAc(2) [N1]	2	P42892	P42892 [632-639]	0	3962.53	HexNAc(6)Hex(7)Fuc(1)NeuAc(2)	0	632	6.64	300.4	51.9	2.29256e-07	4.42787e-08	0	0	0.000809505	0.000156957	0	0	High
High	[K].NTSVEHTR.[L]	1xHexNAc(2)Hex(8) [N1]	1	Q96JJ7	Q96JJ7 [258-265]	0	2646.04	HexNAc(2)Hex(8)	0	258	1.66	213.7	40.5	0.0220516	0.00407056	0.00364963	0.00451807	0.0314984	0.00677201	0.00559701	0.00626305	High
High	[K].NVSCLWCNTNK.[A]	2xCarbamidomethyl [C4; C7]; 1xHexNAc(2)Hex(8) [N1]	1	P53801	P53801 [54-64]	0	3098.2	HexNAc(2)Hex(8)	0	54	7.28	261.2	135.2	5.28688e-08	2.02896e-08	0	0	0.000206051	8.06338e-05	0	0	High
High	[K].NVTNR.[S]	1xHexNAc(3)Hex(3) [N4]; 1xHexNAc(6)Hex(6)Fuc(1)NeuAc(2) [N1]; 1xHexNAc(5)Hex(5)Fuc(1)NeuAc(2) [N1]; 1xHexNAc(4)Hex(4) [N4]	2	P05556	P05556 [94-98]	0	4617.76	HexNAc(5)Hex(5)Fuc(1)NeuAc(2); HexNAc(4)Hex(4)	-1	94	1.7	66.5	2.6	0.0199204	0.00892857	0.00865052	0.00988142	0.986923	0.482066	0.479887	0.502602	High
High	[K].NVTNR.[S]	1xHexNAc(5)Hex(4)NeuAc(2) [N1]; 1xHexNAc(4)Hex(3)NeuAc(1) [N4]	1	P05556	P05556 [94-98]	0	4438.69	HexNAc(5)Hex(4)NeuAc(2); HexNAc(4)Hex(3)NeuAc(1)	0	94	1.91	74.4	2	0.0122958	0.00407056	0.00371747	0.00457317	0.975605	0.387117	0.386624	0.412371	High
High	[K].NVTNR.[S]	1xHexNAc(2)Hex(5)Fuc(1) [N4]; 1xHexNAc(7)Hex(6)Fuc(1)NeuAc(4) [N1]	1	P05556	P05556 [94-98]	0	5670.11	HexNAc(7)Hex(6)Fuc(1)NeuAc(4); HexNAc(2)Hex(5)Fuc(1)	1	94	2.02	12.2	4.3	0.00958503	0.00407056	0.00377834	0.00465116	0.969361	0.367054	0.366553	0.394815	High
High	[K].NVTNR.[S]	1xHexNAc(3)Hex(5)NeuAc(1) [N4]; 1xHexNAc(4)Hex(5)NeuAc(1) [N1]	1	P05556	P05556 [94-98]	0	4227.6	HexNAc(4)Hex(5)NeuAc(1); HexNAc(3)Hex(5)NeuAc(1)	0	94	2.35	82.5	1.5	0.00450478	0.00204499	0.00187617	0.0021322	0.945235	0.395564	0.392661	0.41561	High
High	[K].NVTNR.[S]	1xHexNAc(4)Hex(5) [N1]; 1xHexNAc(5)Hex(4)NeuAc(1) [N4]	1	P05556	P05556 [94-98]	0	4180.61	HexNAc(4)Hex(5); HexNAc(5)Hex(4)NeuAc(1)	1	94	2.47	107	8.7	0.00342293	0.00294551	0.00272109	0.00332226	0.91962	0.254902	0.254113	0.278953	High
High	[K].NVTVK.[S]	1xHexNAc(7)Hex(8)Fuc(1)NeuAc(1) [N1]	1	O75976	O75976 [855-859]	0	3715.47	HexNAc(7)Hex(8)Fuc(1)NeuAc(1)	0	855	1.33	39.7	0.4	0.0465526	0.0083632	0.00827423	0.0102489	0.992368	0.443342	0.443111	0.468192	High
High	[K].NVTVK.[S]	1xHexNAc(5)Hex(6)Fuc(1)NeuAc(2) [N1]	1	O75976	O75976 [855-859]	0	3276.3	HexNAc(5)Hex(6)Fuc(1)NeuAc(2)	0	855	1.91	191	2.6	0.0121619	0.00892857	0.00884956	0.010101	0.978806	0.455194	0.452474	0.476309	High
High	[K].NVTVK.[S]	1xHexNAc(4)Hex(5)Fuc(1)NeuAc(2) [N1]	1	O75976	O75976 [855-859]	0	2911.17	HexNAc(4)Hex(5)Fuc(1)NeuAc(2)	0	855	2.02	196.8	9.9	0.00960056	0.00407056	0.00376411	0.00462963	0.96941	0.377116	0.376772	0.4041	High
High	[K].NVTVK.[S]	1xHexNAc(4)Hex(5)Fuc(1)NeuAc(1) [N1]	1	O75976	O75976 [855-859]	0	2620.08	HexNAc(4)Hex(5)Fuc(1)NeuAc(1)	0	855	2.52	203.7	4.3	0.0030155	0.00204499	0.00195312	0.00222717	0.920159	0.326486	0.324731	0.346774	High
High	[K].NYSEVCK.[N]	1xHexNAc(5)Hex(6)Fuc(1)NeuAc(2) [N1]; 1xCarbamidomethyl [C6]	1	Q86WC4	Q86WC4 [216-222]	0	3615.36	HexNAc(5)Hex(6)Fuc(1)NeuAc(2)	0	216	2.53	220.2	7.7	0.0029295	0.00204499	0.0019685	0.00224719	0.917905	0.319149	0.31808	0.34012	High
High	[K].PLFNK.[S]	1xHexNAc(6)Hex(7)NeuAc(3) [N4]	1	P20645	P20645 [54-58]	0	3844.49	HexNAc(6)Hex(7)NeuAc(3)	0	54	2.31	119	0	0.00494844	0.00407056	0.00397351	0.00487013	0.942142	0.3	0.298995	0.326287	High
High	[K].QDNETGIYYETWNVK.[A]	1xHexNAc(2)Hex(9) [N3]	1	O75503	O75503 [201-215]	0	3724.48	HexNAc(2)Hex(9)	0	201	6.06	198.5	107.6	8.74858e-07	1.07212e-07	0	0	0.00308211	0.000369096	0	0	High
High	[K].QNASLTK.[H]	1xHexNAc(6)Hex(7)NeuAc(2) [N2]	1	Q9Y6Q3	Q9Y6Q3 [612-618]	0	3696.45	HexNAc(6)Hex(7)NeuAc(2)	0	612	1.26	246.8	31.3	0.0552628	0.0083632	0.00823529	0.0101892	0.0690732	0.0124334	0.0123023	0.0137795	High
High	[K].QNNGAFNETLFR.[N]	1xHexNAc(2)Hex(9) [N7]	1	P02786	P02786 [721-732]	0	3275.31	HexNAc(2)Hex(9)	0	721	3.79	127.3	42.4	0.000161313	1.06866e-05	0	0	0.36122	0.045858	0.0454545	0.0512397	High
High	[K].QNNGAFNETLFR.[N]	1xHexNAc(2)Hex(8) [N7]	1	P02786	P02786 [721-732]	0	3113.26	HexNAc(2)Hex(8)	0	721	7.52	461.9	229.6	3.03564e-08	8.32905e-09	0	0	0.000107264	2.95746e-05	0	0	High
High	[K].QSGDVTCNCTDGR.[V]	2xCarbamidomethyl [C7; C9]; 1xHexNAc(4)Hex(5)Fuc(1)NeuAc(2) [N8]	1	Q07954	Q07954 [4357-4369]	0	3820.4	HexNAc(4)Hex(5)Fuc(1)NeuAc(2)	0	4357	7.02	295.9	98.6	9.45045e-08	2.50083e-08	0	0	0.000333855	8.85484e-05	0	0	High
High	[K].QVALQTFGNQTTIIPAGGAGYK.[V]	1xDeamidated [Q10]; 1xHexNAc(6)Hex(7)NeuAc(1) [N9]	1	Q9NX62	Q9NX62 [251-272]	0	4880.1	HexNAc(6)Hex(7)NeuAc(1)	1	251	5.39	224	172.5	4.10492e-06	4.82013e-07	0	0	0.0142989	0.00677201	0.00603622	0.00674157	High
High	[K].QVALQTFGNQTTIIPAGGAGYK.[V]	1xHexNAc(6)Hex(7)Fuc(1) [N9]	1	Q9NX62	Q9NX62 [251-272]	0	4734.08	HexNAc(6)Hex(7)Fuc(1)	-1	251	7.99	383.9	354.2	1.03291e-08	2.5713e-09	0	0	3.65004e-05	9.14139e-06	0	0	High
High	[K].RNSTIPTK.[Q]	1xHexNAc(5)Hex(6)NeuAc(1) [N2]	1	P0DMV9	P0DMV9 [416-423]	1	3195.33	HexNAc(5)Hex(6)NeuAc(1)	0	416	2.36	69.6	1.4	0.00441019	0.00204499	0.00188324	0.00214133	0.944123	0.394222	0.393488	0.416832	High
High	[K].SAEGTFFINK.[T]	1xHexNAc(2)Hex(8) [N9]	1	P06865	P06865 [149-158]	0	2816.14	HexNAc(2)Hex(8)	0	149	7.64	432.2	212.8	2.30993e-08	6.26465e-09	0	0	8.16233e-05	2.22532e-05	0	0	High
High	[K].SLVTQYLNATGNR.[W]	1xHexNAc(8)Hex(9) [N8]	1	P08195	P08195 [417-429]	0	4519.86	HexNAc(8)Hex(9)	1	417	6.69	235.8	150.9	2.05214e-07	3.97476e-08	0	0	0.000724673	0.000140881	0	0	High
High	[K].SLVTQYLNATGNR.[W]	1xHexNAc(6)Hex(7)Fuc(1)NeuAc(3) [N8]	1	P08195	P08195 [417-429]	0	4808.94	HexNAc(6)Hex(7)Fuc(1)NeuAc(3)	1	417	6.77	278.2	176.6	1.68604e-07	4.84485e-08	0	0	0.000656824	0.000191417	0	0	High
High	[K].SLVTQYLNATGNR.[W]	1xHexNAc(6)Hex(7)Fuc(1)NeuAc(2) [N8]	1	P08195	P08195 [417-429]	0	4517.84	HexNAc(6)Hex(7)Fuc(1)NeuAc(2)	0	417	7.41	286.1	156.6	3.89343e-08	1.5134e-08	0	0	0.000151751	6.0358e-05	0	0	High
High	[K].TAVNCSSDFDACLITK.[A]	2xCarbamidomethyl [C5; C12]; 1xHexNAc(7)Hex(8)Fuc(1)NeuAc(1) [N4]	1	P13987	P13987 [40-55]	0	4956.94	HexNAc(7)Hex(8)Fuc(1)NeuAc(1)	1	40	2.21	83	29.8	0.00619373	0.00407056	0.0038961	0.00477707	0.95328	0.323367	0.321902	0.350384	High
High	[K].TAVNCSSDFDACLITK.[A]	2xCarbamidomethyl [C5; C12]; 1xHexNAc(7)Hex(8)NeuAc(1) [N4]	1	P13987	P13987 [40-55]	0	4810.88	HexNAc(7)Hex(8)NeuAc(1)	-1	40	4.41	159.3	71.2	3.84892e-05	2.38822e-06	0	0	0.119229	0.015625	0.0152284	0.0171429	High
High	[K].TAVNCSSDFDACLITK.[A]	1xHexNAc(5)Hex(6)Fuc(1)NeuAc(2) [N4]; 2xCarbamidomethyl [C5; C12]	1	P13987	P13987 [40-55]	0	4517.77	HexNAc(5)Hex(6)Fuc(1)NeuAc(2)	1	40	5.85	219.9	125.6	1.41108e-06	1.67532e-07	0	0	0.00547091	0.000673125	0	0	High
High	[K].TAVNCSSDFDACLITK.[A]	2xCarbamidomethyl [C5; C12]; 1xHexNAc(6)Hex(7)Fuc(1)NeuAc(1) [N4]	1	P13987	P13987 [40-55]	0	4591.81	HexNAc(6)Hex(7)Fuc(1)NeuAc(1)	1	40	5.93	192	112.9	1.18685e-06	1.55032e-07	0	0	0.00460551	0.000624729	0	0	High
High	[K].TAVNCSSDFDACLITK.[A]	2xCarbamidomethyl [C5; C12]; 1xHexNAc(4)Hex(5)NeuAc(2) [N4]	1	P13987	P13987 [40-55]	0	4006.58	HexNAc(4)Hex(5)NeuAc(2)	1	40	7.04	376.5	166.2	9.12518e-08	2.45512e-08	0	0	0.000322368	8.6924e-05	0	0	High
High	[K].TAVNCSSDFDACLITK.[A]	2xCarbamidomethyl [C5; C12]; 1xHexNAc(4)Hex(5)Fuc(1)NeuAc(1) [N4]	1	P13987	P13987 [40-55]	0	3861.54	HexNAc(4)Hex(5)Fuc(1)NeuAc(1)	0	40	7.98	431.5	218.3	1.04326e-08	2.69546e-09	0	0	3.6866e-05	9.58277e-06	0	0	High
High	[K].TAVNCSSDFDACLITK.[A]	2xCarbamidomethyl [C5; C12]; 1xHexNAc(4)Hex(5)Fuc(1)NeuAc(2) [N4]	2	P13987	P13987 [40-55]	0	4152.64	HexNAc(4)Hex(5)Fuc(1)NeuAc(2)	0	40	8.21	466.8	297	6.14715e-09	1.57284e-09	0	0	2.17228e-05	5.58947e-06	0	0	High
High	[K].TCDWLPKPNMSASCK.[E]	2xCarbamidomethyl [C2; C14]; 1xHexNAc(6)Hex(7)Fuc(1)NeuAc(3) [N9]; 1xOxidation [M10]	1	P07602	P07602 [93-107]	0	5182.98	HexNAc(6)Hex(7)Fuc(1)NeuAc(3)	0	93	5.74	213.3	167.8	1.81522e-06	1.84386e-07	0	0	0.00637388	0.00478469	0.00462963	0.00515464	High
High	[K].TCDWLPKPNMSASCK.[E]	2xCarbamidomethyl [C2; C14]; 1xHexNAc(5)Hex(6)Fuc(1)NeuAc(1) [N9]; 1xOxidation [M10]	1	P07602	P07602 [93-107]	0	4235.66	HexNAc(5)Hex(6)Fuc(1)NeuAc(1)	0	93	7.18	239.3	164.9	6.62167e-08	2.0023e-08	0	0	0.000233947	7.08261e-05	0	0	High
High	[K].TCDWLPKPNMSASCK.[E]	2xCarbamidomethyl [C2; C14]; 1xHexNAc(6)Hex(7)Fuc(1)NeuAc(2) [N9]	1	P07602	P07602 [93-107]	0	4875.89	HexNAc(6)Hex(7)Fuc(1)NeuAc(2)	0	93	7.25	293.3	217.4	5.61129e-08	1.83331e-08	0	0	0.000198256	6.4814e-05	0	0	High
High	[K].TCDWLPKPNMSASCK.[E]	2xCarbamidomethyl [C2; C14]; 1xHexNAc(5)Hex(6)Fuc(1)NeuAc(3) [N9]	1	P07602	P07602 [93-107]	0	4801.86	HexNAc(5)Hex(6)Fuc(1)NeuAc(3)	0	93	7.45	365.4	276.1	3.58376e-08	1.0281e-08	0	0	0.000126629	3.60972e-05	0	0	High
High	[K].TCDWLPKPNMSASCK.[E]	2xCarbamidomethyl [C2; C14]; 1xHexNAc(5)Hex(6)Fuc(1)NeuAc(2) [N9]; 1xOxidation [M10]	2	P07602	P07602 [93-107]	0	4526.75	HexNAc(5)Hex(6)Fuc(1)NeuAc(2)	0	93	7.46	327	233.1	3.44489e-08	9.40662e-09	0	0	0.000121723	3.29682e-05	0	0	High
High	[K].TCDWLPKPNMSASCK.[E]	2xCarbamidomethyl [C2; C14]; 1xHexNAc(4)Hex(5)Fuc(1)NeuAc(2) [N9]	1	P07602	P07602 [93-107]	0	4145.63	HexNAc(4)Hex(5)Fuc(1)NeuAc(2)	0	93	7.97	386.3	229.7	1.06263e-08	2.81826e-09	0	0	3.75504e-05	1.00192e-05	0	0	High
High	[K].TGIYQVLNGSR.[L]	1xHexNAc(5)Hex(6)Fuc(1)NeuAc(2) [N8]	1	Q9UQV4	Q9UQV4 [225-235]	0	3923.61	HexNAc(5)Hex(6)Fuc(1)NeuAc(2)	0	225	6.26	251.5	49.9	5.5385e-07	6.67914e-08	0	0	0.00195341	0.000223238	0	0	High
High	[K].TGIYQVLNGSR.[L]	1xHexNAc(5)Hex(6)NeuAc(2) [N8]	1	Q9UQV4	Q9UQV4 [225-235]	0	3777.55	HexNAc(5)Hex(6)NeuAc(2)	0	225	6.85	260.8	65.2	1.42094e-07	3.31144e-08	0	0	0.000501889	0.000117337	0	0	High
High	[K].TMFNSTDIK.[L]	1xHexNAc(4)Hex(5)NeuAc(2) [N4]	1	Q96K49	Q96K49 [65-73]	0	3261.28	HexNAc(4)Hex(5)NeuAc(2)	0	65	2.88	251.2	19.5	0.00133026	0.00294551	0.00293255	0.0035461	0.00664372	0.00478469	0.00458715	0.00510204	High
High	[K].TVTTSGTTNNTVTPTSQPVR.[K]	1xHexNAc(2)Hex(9) [N9]	1	Q04900	Q04900 [138-157]	0	3926.68	HexNAc(2)Hex(9)	0	138	8.44	475.3	344.2	3.63123e-09	4.68204e-10	0	0	1.4155e-05	1.92336e-06	0	0	High
High	[K].TVTTSGTTNNTVTPTSQPVR.[K]	1xHexNAc(2)Hex(8) [N9]	1	Q04900	Q04900 [138-157]	0	3764.62	HexNAc(2)Hex(8)	0	138	8.64	446.7	336.1	2.26914e-09	4.63429e-10	0	0	8.0188e-06	1.62805e-06	0	0	High
High	[K].VASVININPNTTHSTGSCR.[S]	1xCarbamidomethyl [C18]; 1xHexNAc(6)Hex(7)Fuc(1)NeuAc(1) [N10]	1	P13473	P13473 [248-266]	0	4817.99	HexNAc(6)Hex(7)Fuc(1)NeuAc(1)	0	248	7.13	281	200.7	7.39725e-08	2.12296e-08	0	0	0.000261341	7.51173e-05	0	0	High
High	[K].VASVININPNTTHSTGSCR.[S]	1xCarbamidomethyl [C18]; 1xHexNAc(6)Hex(7)Fuc(1)NeuAc(2) [N10]	1	P13473	P13473 [248-266]	0	5109.09	HexNAc(6)Hex(7)Fuc(1)NeuAc(2)	0	248	7.21	268.1	218	6.15909e-08	1.93793e-08	0	0	0.000217607	6.85364e-05	0	0	High
High	[K].VASVININPNTTHSTGSCR.[S]	1xCarbamidomethyl [C18]; 1xHexNAc(5)Hex(5)Fuc(1)NeuAc(2) [N10]	1	P13473	P13473 [248-266]	0	4581.9	HexNAc(5)Hex(5)Fuc(1)NeuAc(2)	0	248	7.34	318.4	240.2	4.53076e-08	1.41012e-08	0	0	0.000160086	4.97393e-05	0	0	High
High	[K].VASVININPNTTHSTGSCR.[S]	1xCarbamidomethyl [C18]; 1xHexNAc(6)Hex(7)Fuc(1)NeuAc(3) [N10]	1	P13473	P13473 [248-266]	0	5400.18	HexNAc(6)Hex(7)Fuc(1)NeuAc(3)	1	248	7.44	297.1	253.9	3.59704e-08	1.04045e-08	0	0	0.000127099	3.6539e-05	0	0	High
High	[K].VASVININPNTTHSTGSCR.[S]	1xCarbamidomethyl [C18]; 1xHexNAc(6)Hex(7)NeuAc(1) [N10]	1	P13473	P13473 [248-266]	0	4671.93	HexNAc(6)Hex(7)NeuAc(1)	0	248	7.55	278.8	188.9	2.79497e-08	1.0811e-08	0	0	0.000108942	4.33082e-05	0	0	High
High	[K].VASVININPNTTHSTGSCR.[S]	1xCarbamidomethyl [C18]; 1xHexNAc(4)Hex(5)Fuc(1) [N10]	2	P13473	P13473 [248-266]	0	3796.63	HexNAc(4)Hex(5)Fuc(1)	0	248	7.58	458.9	314.1	2.62483e-08	9.56192e-09	0	0	0.000102311	3.83665e-05	0	0	High
High	[K].VASVININPNTTHSTGSCR.[S]	1xCarbamidomethyl [C18]; 1xHexNAc(4)Hex(5)Fuc(1)NeuAc(2) [N10]	1	P13473	P13473 [248-266]	0	4378.82	HexNAc(4)Hex(5)Fuc(1)NeuAc(2)	0	248	7.85	467.2	296.5	1.42842e-08	3.16328e-09	0	0	5.56795e-05	1.27223e-05	0	0	High
High	[K].VASVININPNTTHSTGSCR.[S]	1xCarbamidomethyl [C18]; 1xHexNAc(7)Hex(8)Fuc(1)NeuAc(1) [N10]	1	P13473	P13473 [248-266]	0	5183.12	HexNAc(7)Hex(8)Fuc(1)NeuAc(1)	0	248	7.87	352.3	278.7	1.34221e-08	3.74082e-09	0	0	4.74296e-05	1.32964e-05	0	0	High
High	[K].VASVININPNTTHSTGSCR.[S]	1xCarbamidomethyl [C18]; 1xDeamidated [N8]; 1xHexNAc(3)Hex(3)Fuc(1) [N10]	1	P13473	P13473 [248-266]	0	3270.43	HexNAc(3)Hex(3)Fuc(1)	0	248	7.9	531.7	398.6	1.24611e-08	3.33088e-09	0	0	4.40339e-05	1.18405e-05	0	0	High
High	[K].VASVININPNTTHSTGSCR.[S]	1xCarbamidomethyl [C18]; 1xHexNAc(5)Hex(6)Fuc(1)NeuAc(1) [N10]	2	P13473	P13473 [248-266]	0	4452.86	HexNAc(5)Hex(6)Fuc(1)NeuAc(1)	0	248	8.36	500.2	328.3	4.32424e-09	9.36117e-10	0	0	1.52811e-05	3.31932e-06	0	0	High
High	[K].VASVININPNTTHSTGSCR.[S]	1xCarbamidomethyl [C18]; 1xHexNAc(2)Hex(8) [N10]	1	P13473	P13473 [248-266]	0	3730.57	HexNAc(2)Hex(8)	0	248	9.11	587.7	402.6	7.72652e-10	2.08139e-10	0	0	3.01194e-06	8.6157e-07	0	0	High
High	[K].VASVININPNTTHSTGSCR.[S]	1xHexNAc(5)Hex(6)Fuc(1)NeuAc(2) [N10]; 1xCarbamidomethyl [C18]	3	P13473	P13473 [248-266]	0	4743.96	HexNAc(5)Hex(6)Fuc(1)NeuAc(2)	0	248	9.18	542.4	390.5	6.66396e-10	1.58151e-10	0	0	2.59773e-06	6.58459e-07	0	0	High
High	[K].VASVININPNTTHSTGSCR.[S]	1xCarbamidomethyl [C18]; 1xHexNAc(6)Hex(7)Fuc(1) [N10]	1	P13473	P13473 [248-266]	0	4526.9	HexNAc(6)Hex(7)Fuc(1)	0	248	9.18	550.2	429	6.66396e-10	1.231e-10	0	0	2.59773e-06	5.1481e-07	0	0	High
High	[K].VASVININPNTTHSTGSCR.[S]	1xCarbamidomethyl [C18]; 1xHexNAc(5)Hex(6)Fuc(1) [N10]	1	P13473	P13473 [248-266]	0	4161.76	HexNAc(5)Hex(6)Fuc(1)	0	248	9.41	543.6	372.2	3.86771e-10	4.95991e-11	0	0	1.3668e-06	1.75277e-07	0	0	High
High	[K].VASVININPNTTHSTGSCR.[S]	1xCarbamidomethyl [C18]; 1xHexNAc(4)Hex(5)Fuc(1)NeuAc(1) [N10]	1	P13473	P13473 [248-266]	0	4087.73	HexNAc(4)Hex(5)Fuc(1)NeuAc(1)	0	248	12.04	689.4	517.2	9.21088e-13	1.2632e-13	0	0	3.25501e-09	4.46398e-10	0	0	High
High	[K].VLGQSQEPNVNPASAGNQTQK.[T]	1xHexNAc(4)Hex(5)NeuAc(2) [N17]; 1xDeamidated [Q18]	1	Q5VW38	Q5VW38 [153-173]	0	4372.83	HexNAc(4)Hex(5)NeuAc(2)	1	153	3.77	137.2	45.2	0.0001687	1.11897e-05	0	0	0.395071	0.0718446	0.0707457	0.0759494	High
High	[K].VLGQSQEPNVNPASAGNQTQK.[T]	1xHexNAc(4)Hex(5)Fuc(1)NeuAc(2) [N17]	2	Q5VW38	Q5VW38 [153-173]	0	4517.9	HexNAc(4)Hex(5)Fuc(1)NeuAc(2)	0	153	9.59	534.5	436.1	2.57533e-10	2.91603e-11	0	0	9.10087e-07	1.03049e-07	0	0	High
High	[K].VPGNQTSTTLK.[L]	1xHexNAc(5)Hex(6)Fuc(1)NeuAc(2) [N4]	1	P32004	P32004 [668-678]	0	3861.58	HexNAc(5)Hex(6)Fuc(1)NeuAc(2)	0	668	3.79	185.5	56.4	0.000160951	1.04441e-05	0	0	0.360703	0.045858	0.0455213	0.0513245	High
High	[K].VPGNQTSTTLK.[L]	1xHexNAc(4)Hex(5)Fuc(1)NeuAc(2) [N4]	1	P32004	P32004 [668-678]	0	3496.45	HexNAc(4)Hex(5)Fuc(1)NeuAc(2)	0	668	6.76	333.8	49	1.73187e-07	4.95887e-08	0	0	0.000674666	0.000195896	0	0	High
High	[K].VPGNQTSTTLK.[L]	1xHexNAc(4)Hex(5)Fuc(1)NeuAc(1) [N4]	1	P32004	P32004 [668-678]	0	3205.35	HexNAc(4)Hex(5)Fuc(1)NeuAc(1)	0	668	7.2	411.9	101.5	6.37061e-08	1.98562e-08	0	0	0.000225079	7.02329e-05	0	0	High
High	[K].WQMNFTVR.[Y]	1xHexNAc(6)Hex(7)NeuAc(2) [N4]	1	P13473	P13473 [46-53]	0	4016.56	HexNAc(6)Hex(7)NeuAc(2)	1	46	3.16	163.6	22.3	0.000691319	3.83592e-05	0	0	0.72621	0.147152	0.146457	0.158076	High
High	[K].WQMNFTVR.[Y]	1xHexNAc(5)Hex(6)NeuAc(1) [N4]	1	P13473	P13473 [46-53]	0	3360.33	HexNAc(5)Hex(6)NeuAc(1)	0	46	3.73	146.2	2.1	0.000187159	1.33837e-05	0	0	0.396078	0.0555555	0.0553977	0.0625	High
High	[K].WQMNFTVR.[Y]	1xHexNAc(5)Hex(6)NeuAc(2) [N4]; 1xOxidation [M3]	1	P13473	P13473 [46-53]	0	3667.42	HexNAc(5)Hex(6)NeuAc(2)	0	46	7.37	380.2	102.1	4.30373e-08	1.24955e-08	0	0	0.000152065	4.40105e-05	0	0	High
High	[K].YIHQNYTK.[A]	1xHexNAc(2)Hex(9) [N5]	1	Q02809	Q02809 [534-541]	0	2931.17	HexNAc(2)Hex(9)	0	534	2.82	266.3	53.4	0.00151702	0.000100817	0	0	0.00757729	0.00102565	0	0	High
High	[K].YPHNHHVVNNTLEGNCSSK.[S]	1xCarbamidomethyl [C16]; 1xHexNAc(2)Hex(9) [N9]; 1xHexNAc(6)Hex(4) [N15]	1	P15586	P15586 [103-121]	0	5938.33	HexNAc(2)Hex(9); HexNAc(6)Hex(4)	-1	103	2.23	151.3	138.1	0.00585362	0.00407056	0.00392157	0.0048	0.950687	0.323089	0.322835	0.351421	High
High	[K].YPHNHHVVNNTLEGNCSSK.[S]	1xCarbamidomethyl [C16]; 1xHexNAc(4)Hex(5)Fuc(1)NeuAc(2) [N9]; 1xHexNAc(2)Hex(5) [N15]	1	P15586	P15586 [103-121]	0	5774.26	HexNAc(4)Hex(5)Fuc(1)NeuAc(2); HexNAc(2)Hex(5)	0	103	2.93	198.9	136	0.00117554	7.75656e-05	0	0	0.818693	0.228378	0.22807	0.245614	High
High	[K].YPHNHHVVNNTLEGNCSSK.[S]	1xCarbamidomethyl [C16]; 1xHexNAc(2)Hex(9) [N9]; 1xHexNAc(6)Hex(3) [N15]	1	P15586	P15586 [103-121]	0	5776.27	HexNAc(2)Hex(9); HexNAc(6)Hex(3)	0	103	5.32	230.5	200.9	4.79705e-06	5.83129e-07	0	0	0.0166696	0.00677201	0.00588235	0.00659341	High
High	[K].YPHNHHVVNNTLEGNCSSK.[S]	1xCarbamidomethyl [C16]; 1xHexNAc(2)Hex(3) [N9]; 1xHexNAc(6)Hex(6)NeuAc(2) [N15]	1	P15586	P15586 [103-121]	0	5872.31	HexNAc(2)Hex(3); HexNAc(6)Hex(6)NeuAc(2)	0	103	5.69	254.4	229.3	2.06127e-06	2.15789e-07	0	0	0.00723161	0.00677201	0.00675676	0.0075	High
High	[R].AACAVKPQEVQMVNGTITNPINGK.[S]	1xCarbamidomethyl [C3]; 1xHexNAc(6)Hex(7) [N14]	1	P11717	P11717 [2123-2146]	0	4893.14	HexNAc(6)Hex(7)	0	2123	7.6	300.3	173.4	2.48604e-08	6.97022e-09	0	0	8.78458e-05	2.47558e-05	0	0	High
High	[R].AACAVKPQEVQMVNGTITNPINGK.[S]	1xCarbamidomethyl [C3]; 1xHexNAc(4)Hex(5)Fuc(1)NeuAc(2) [N14]; 1xDeamidated [N22]; 1xOxidation [M12]	1	P11717	P11717 [2123-2146]	0	4908.11	HexNAc(4)Hex(5)Fuc(1)NeuAc(2)	0	2123	9.33	552.7	420.1	4.62802e-10	8.07593e-11	0	0	1.63548e-06	2.85393e-07	0	0	High
High	[R].AAGNTSESQSCAR.[S]	1xCarbamidomethyl [C11]; 1xHexNAc(2)Hex(8) [N4]	1	Q86WC4	Q86WC4 [132-144]	0	3041.15	HexNAc(2)Hex(8)	0	132	8.07	463.1	377	8.4479e-09	1.44658e-09	0	0	3.29305e-05	5.67151e-06	0	0	High
High	[R].ACMNETR.[I]	1xCarbamidomethyl [C2]; 1xHexNAc(4)Hex(5)NeuAc(2) [N4]	1	P42892	P42892 [184-190]	0	3086.13	HexNAc(4)Hex(5)NeuAc(2)	0	184	1.58	106.9	9.5	0.0261384	0.00407056	0.00363196	0.00449102	0.987496	0.413655	0.413417	0.438499	High
High	[R].ACMNETR.[I]	1xCarbamidomethyl [C2]; 1xHexNAc(5)Hex(6)NeuAc(1) [N4]	1	P42892	P42892 [184-190]	0	3160.17	HexNAc(5)Hex(6)NeuAc(1)	0	184	4.6	147.4	35.3	2.48677e-05	2.18271e-06	0	0	0.0882143	0.02457	0.0245098	0.0268817	High
High	[R].AEPPLNASASDQGEK.[V]	1xHexNAc(2)Hex(8) [N6]	1	Q9Y4L1	Q9Y4L1 [926-940]	0	3216.29	HexNAc(2)Hex(8)	0	926	7.74	265.6	185.5	1.79944e-08	5.07235e-09	0	0	6.35859e-05	1.8023e-05	0	0	High
High	[R].AEPPLNASASDQGEK.[V]	1xHexNAc(2)Hex(7) [N6]	1	Q9Y4L1	Q9Y4L1 [926-940]	0	3054.24	HexNAc(2)Hex(7)	0	926	7.75	330.1	216.2	1.78273e-08	4.82426e-09	0	0	6.29954e-05	1.71426e-05	0	0	High
High	[R].AEPPLNASASDQGEK.[V]	1xHexNAc(2)Hex(6) [N6]	1	Q9Y4L1	Q9Y4L1 [926-940]	0	2892.19	HexNAc(2)Hex(6)	0	926	8.63	489.3	345.7	2.36429e-09	4.89116e-10	0	0	8.35503e-06	1.7202e-06	0	0	High
High	[R].ALGFENATQALGR.[A]	1xHexNAc(2)Hex(9) [N6]	1	Q08380	Q08380 [64-76]	0	3212.34	HexNAc(2)Hex(9)	0	64	3.44	158	26.6	0.000364926	2.6774e-05	0	0	0.560558	0.100997	0.100872	0.113128	High
High	[R].ALGFENATQALGR.[A]	1xHexNAc(5)Hex(6)Fuc(1)NeuAc(3) [N6]	1	Q08380	Q08380 [64-76]	0	4354.76	HexNAc(5)Hex(6)Fuc(1)NeuAc(3)	0	64	4.58	169.8	65.7	2.64767e-05	1.89163e-06	0	0	0.085271	0.015625	0.0154374	0.0172745	High
High	[R].ALGFENATQALGR.[A]	1xHexNAc(5)Hex(6)Fuc(1)NeuAc(2) [N6]	1	Q08380	Q08380 [64-76]	0	4063.66	HexNAc(5)Hex(6)Fuc(1)NeuAc(2)	0	64	6.14	237.5	40.5	7.29688e-07	1.16219e-07	0	0	0.00283649	0.000464359	0	0	High
High	[R].ALPGGADNASVASGAAASPGPQR.[S]	1xHexNAc(2)Hex(8) [N8]	1	O95502	O95502 [35-57]	0	3724.58	HexNAc(2)Hex(8)	0	35	3.01	196.7	140.8	0.00098465	0.00149031	0.00147493	0.00178253	0.00491766	0.00246914	0.00240964	0.00268096	High
High	[R].ALSNISLR.[L]	1xHexNAc(5)Hex(6)Fuc(1)NeuAc(3) [N4]	1	O15031	O15031 [124-131]	0	3880.57	HexNAc(5)Hex(6)Fuc(1)NeuAc(3)	0	124	3.82	219	7	0.000150023	9.72279e-06	0	0	0.344687	0.0447761	0.0447094	0.050505	High
High	[R].ALSNISLR.[L]	1xHexNAc(4)Hex(5)Fuc(1)NeuAc(2) [N4]	1	O15031	O15031 [124-131]	0	3224.35	HexNAc(4)Hex(5)Fuc(1)NeuAc(2)	0	124	6.65	266.1	68.8	2.24423e-07	4.32389e-08	0	0	0.000792455	0.000153268	0	0	High
High	[R].ANLTVVLLR.[G]	1xHexNAc(6)Hex(7)NeuAc(2) [N2]	1	P05362	P05362 [144-152]	0	3933.67	HexNAc(6)Hex(7)NeuAc(2)	0	144	3.75	132.1	42.6	0.000179417	1.1722e-05	0	0	0.386045	0.0467836	0.0465793	0.052459	High
High	[R].ANLTVVLLR.[G]	1xHexNAc(6)Hex(7)NeuAc(3) [N2]	1	P05362	P05362 [144-152]	0	4224.77	HexNAc(6)Hex(7)NeuAc(3)	0	144	4.07	120.7	31.5	8.56066e-05	4.94841e-06	0	0	0.231087	0.0302548	0.0299684	0.0336879	High
High	[R].ANLTVVLLR.[G]	1xHexNAc(6)Hex(7)Fuc(1)NeuAc(3) [N2]	1	P05362	P05362 [144-152]	0	4370.83	HexNAc(6)Hex(7)Fuc(1)NeuAc(3)	0	144	4.19	156.5	53.1	6.38974e-05	3.17477e-06	0	0	0.183307	0.0214876	0.0212418	0.0238095	High
High	[R].ANLTVVLLR.[G]	1xHexNAc(5)Hex(6)Fuc(1)NeuAc(2) [N2]	1	P05362	P05362 [144-152]	0	3714.6	HexNAc(5)Hex(6)Fuc(1)NeuAc(2)	0	144	5.02	198.1	31.5	9.59131e-06	9.72437e-07	0	0	0.0327835	0.00736648	0.00735294	0.00823045	High
High	[R].ANLTVVLLR.[G]	1xHexNAc(5)Hex(6)NeuAc(2) [N2]	2	P05362	P05362 [144-152]	0	3568.54	HexNAc(5)Hex(6)NeuAc(2)	0	144	6.77	262.6	87.9	1.69048e-07	3.5338e-08	0	0	0.000597037	0.000125231	0	0	High
High	[R].ANLTVVLLR.[G]	1xHexNAc(5)Hex(6)NeuAc(3) [N2]	2	P05362	P05362 [144-152]	0	3859.64	HexNAc(5)Hex(6)NeuAc(3)	0	144	7.28	269.6	107.9	5.24496e-08	1.664e-08	0	0	0.000185316	5.87864e-05	0	0	High
High	[R].AVNSSCR.[A]	1xCarbamidomethyl [C6]; 1xHexNAc(6)Hex(9)Fuc(1)NeuAc(2) [N3]	1	Q07954	Q07954 [2519-2525]	0	4198.56	HexNAc(6)Hex(9)Fuc(1)NeuAc(2)	0	2519	2.02	59.1	3.9	0.00958503	0.00407056	0.0037831	0.00465838	0.969361	0.365331	0.364633	0.392857	High
High	[R].CEQDIDDCILNACEHNSTCK.[D]	4xCarbamidomethyl [C1; C8; C13; C19]; 1xHexNAc(5)Hex(4)NeuAc(1) [N16]	1	Q5T1H1	Q5T1H1 [730-749]	0	4436.68	HexNAc(5)Hex(4)NeuAc(1)	0	730	1.65	105.4	0.4	0.0224056	0.00407056	0.0036452	0.00451128	0.028005	0.00677201	0.00568182	0.00635593	High
High	[R].DAGVGFPEYQEEDNSTYNFR.[W]	1xHexNAc(4)Hex(5)Fuc(1)NeuAc(2) [N14]	1	P11717	P11717 [734-753]	0	4688.82	HexNAc(4)Hex(5)Fuc(1)NeuAc(2)	0	734	4.23	87	13.3	5.89343e-05	3.06972e-06	0	0	0.171539	0.0214876	0.0213465	0.0239411	High
High	[R].DAGVGFPEYQEEDNSTYNFR.[W]	1xDeamidated [N18]; 1xHexNAc(5)Hex(6)Fuc(1)NeuAc(1) [N14]	1	P11717	P11717 [734-753]	0	4763.84	HexNAc(5)Hex(6)Fuc(1)NeuAc(1)	-1	734	7.43	257.4	168.6	3.72898e-08	1.14871e-08	0	0	0.00013176	4.04091e-05	0	0	High
High	[R].DAGVVCTNETR.[S]	1xCarbamidomethyl [C6]; 1xHexNAc(4)Hex(5)Fuc(1)NeuAc(2) [N8]	1	Q08380	Q08380 [118-128]	0	3572.38	HexNAc(4)Hex(5)Fuc(1)NeuAc(2)	0	118	2.51	158.1	18.9	0.00311659	0.00204499	0.0019305	0.00220264	0.922609	0.341188	0.340491	0.362144	High
High	[R].DAGVVCTNETR.[S]	1xCarbamidomethyl [C6]; 1xHexNAc(3)Hex(4)Fuc(1)NeuAc(1) [N8]	1	Q08380	Q08380 [118-128]	0	2916.16	HexNAc(3)Hex(4)Fuc(1)NeuAc(1)	0	118	2.91	140.7	13.1	0.00122584	8.23701e-05	0	0	0.824856	0.235762	0.234519	0.252137	High
High	[R].DAGVVCTNETR.[S]	1xCarbamidomethyl [C6]; 1xHexNAc(2)Hex(8) [N8]	1	Q08380	Q08380 [118-128]	0	2924.13	HexNAc(2)Hex(8)	0	118	6.98	252.8	110.4	1.04943e-07	3.08377e-08	0	0	0.000408925	0.00012218	0	0	High
High	[R].DAGVVCTNETR.[S]	1xCarbamidomethyl [C6]; 1xHexNAc(2)Hex(9) [N8]	1	Q08380	Q08380 [118-128]	0	3086.19	HexNAc(2)Hex(9)	0	118	7.7	437.2	259.4	2.01811e-08	5.98588e-09	0	0	7.86638e-05	2.41122e-05	0	0	High
High	[R].DHHGANFSCR.[T]	1xCarbamidomethyl [C9]; 1xHexNAc(7)Hex(8)Fuc(1)NeuAc(2) [N6]	1	P05362	P05362 [178-187]	0	4646.72	HexNAc(7)Hex(8)Fuc(1)NeuAc(2)	0	178	3.9	144.1	42.9	0.000127083	6.67198e-06	0	0	0.308317	0.0357143	0.0354938	0.04	High
High	[R].DHHGANFSCR.[T]	1xCarbamidomethyl [C9]; 1xHexNAc(7)Hex(8)Fuc(1)NeuAc(4) [N6]	1	P05362	P05362 [178-187]	0	5228.91	HexNAc(7)Hex(8)Fuc(1)NeuAc(4)	0	178	3.95	167.6	105.2	0.000112738	5.69562e-06	0	0	0.283438	0.03125	0.0312012	0.0351494	High
High	[R].DHHGANFSCR.[T]	1xHexNAc(8)Hex(9)Fuc(1)NeuAc(3) [N6]; 1xCarbamidomethyl [C9]	1	P05362	P05362 [178-187]	0	5302.95	HexNAc(8)Hex(9)Fuc(1)NeuAc(3)	1	178	5.23	215.8	150.6	5.84594e-06	4.86525e-07	0	0	0.0222866	0.006006	0.00588235	0.00643087	High
High	[R].DHHGANFSCR.[T]	1xCarbamidomethyl [C9]; 1xHexNAc(5)Hex(6)Fuc(1)NeuAc(3) [N6]	1	P05362	P05362 [178-187]	0	4207.55	HexNAc(5)Hex(6)Fuc(1)NeuAc(3)	0	178	5.75	198.3	98.8	1.76735e-06	2.11108e-07	0	0	0.00684287	0.000879685	0	0	High
High	[R].DHHGANFSCR.[T]	1xCarbamidomethyl [C9]; 1xHexNAc(7)Hex(8)Fuc(1)NeuAc(3) [N6]	1	P05362	P05362 [178-187]	0	4937.82	HexNAc(7)Hex(8)Fuc(1)NeuAc(3)	0	178	6.89	283.6	140.9	1.28564e-07	3.12227e-08	0	0	0.000454122	0.000110621	0	0	High
High	[R].DHHGANFSCR.[T]	1xCarbamidomethyl [C9]; 1xHexNAc(6)Hex(7)Fuc(1)NeuAc(2) [N6]	1	P05362	P05362 [178-187]	0	4281.59	HexNAc(6)Hex(7)Fuc(1)NeuAc(2)	0	178	6.92	434	177.9	1.21002e-07	2.94322e-08	0	0	0.000427421	0.000104263	0	0	High
High	[R].DHHGANFSCR.[T]	1xCarbamidomethyl [C9]; 1xHexNAc(6)Hex(7)Fuc(1)NeuAc(3) [N6]	1	P05362	P05362 [178-187]	0	4572.69	HexNAc(6)Hex(7)Fuc(1)NeuAc(3)	0	178	7.49	332.1	189.4	3.23493e-08	9.15922e-09	0	0	0.000114305	3.25177e-05	0	0	High
High	[R].DHHGANFSCR.[T]	1xCarbamidomethyl [C9]; 1xHexNAc(7)Hex(8)Fuc(1)NeuAc(1) [N6]	2	P05362	P05362 [178-187]	0	4355.63	HexNAc(7)Hex(8)Fuc(1)NeuAc(1)	0	178	7.49	405.7	227.6	3.21377e-08	8.8026e-09	0	0	0.000113557	3.12535e-05	0	0	High
High	[R].DHHGANFSCR.[T]	1xCarbamidomethyl [C9]; 1xHexNAc(5)Hex(6)Fuc(1)NeuAc(1) [N6]	1	P05362	P05362 [178-187]	0	3625.36	HexNAc(5)Hex(6)Fuc(1)NeuAc(1)	0	178	7.6	413.7	230	2.48346e-08	6.86971e-09	0	0	8.77547e-05	2.43994e-05	0	0	High
High	[R].DHHGANFSCR.[T]	1xCarbamidomethyl [C9]; 1xHexNAc(6)Hex(7)Fuc(1)NeuAc(1) [N6]	2	P05362	P05362 [178-187]	0	3990.5	HexNAc(6)Hex(7)Fuc(1)NeuAc(1)	0	178	7.6	407.8	241.6	2.48346e-08	6.76821e-09	0	0	8.77547e-05	2.40394e-05	0	0	High
High	[R].DHHGANFSCR.[T]	1xCarbamidomethyl [C9]; 1xHexNAc(5)Hex(6)Fuc(1)NeuAc(2) [N6]	2	P05362	P05362 [178-187]	0	3916.46	HexNAc(5)Hex(6)Fuc(1)NeuAc(2)	0	178	10.76	625.3	453.2	1.73217e-11	2.34566e-12	0	0	6.12126e-08	8.28927e-09	0	0	High
High	[R].DLGPTLANSTHHNVR.[L]	1xHexNAc(5)Hex(6)Fuc(1)NeuAc(3) [N8]	1	P04062	P04062 [302-316]	0	4638.88	HexNAc(5)Hex(6)Fuc(1)NeuAc(3)	0	302	6.74	317.2	148.7	1.84057e-07	5.19506e-08	0	0	0.00071698	0.000205175	0	0	High
High	[R].DLQANDTGR.[Y]	1xHexNAc(7)Hex(8)Fuc(1)NeuAc(2) [N5]	1	P32004	P32004 [486-494]	0	4435.69	HexNAc(7)Hex(8)Fuc(1)NeuAc(2)	0	486	1.67	74.3	1.6	0.0213671	0.00892857	0.00860585	0.00982318	0.987813	0.485636	0.484973	0.507184	High
High	[R].DLQANDTGR.[Y]	1xHexNAc(6)Hex(7)Fuc(1)NeuAc(3) [N5]	1	P32004	P32004 [486-494]	0	4361.65	HexNAc(6)Hex(7)Fuc(1)NeuAc(3)	0	486	2.53	143.7	2.9	0.0029295	0.00204499	0.00197239	0.00225225	0.917905	0.319149	0.318436	0.340528	High
High	[R].DLQANDTGR.[Y]	1xHexNAc(6)Hex(7)Fuc(1)NeuAc(4) [N5]	1	P32004	P32004 [486-494]	0	4652.75	HexNAc(6)Hex(7)Fuc(1)NeuAc(4)	1	486	3.82	169.4	16.9	0.000150023	9.0384e-06	0	0	0.344687	0.0409712	0.0404798	0.0457627	High
High	[R].DYYLNK.[T]	1xHexNAc(5)Hex(6)Fuc(1)NeuAc(3) [N5]	1	P42892	P42892 [266-271]	0	3822.45	HexNAc(5)Hex(6)Fuc(1)NeuAc(3)	0	266	1.73	162.4	2.5	0.0184349	0.00892857	0.00869565	0.00994036	0.985865	0.477623	0.476225	0.49924	High
High	[R].DYYLNK.[T]	1xHexNAc(7)Hex(8)Fuc(1)NeuAc(1) [N5]	1	P42892	P42892 [266-271]	0	3970.52	HexNAc(7)Hex(8)Fuc(1)NeuAc(1)	0	266	2.31	129.3	1.3	0.00494844	0.00407056	0.004	0.00489396	0.942142	0.297089	0.296014	0.322791	High
High	[R].DYYLNK.[T]	1xHexNAc(5)Hex(6)Fuc(1)NeuAc(1) [N5]	1	P42892	P42892 [266-271]	0	3240.26	HexNAc(5)Hex(6)Fuc(1)NeuAc(1)	0	266	2.52	160.3	11.8	0.0030155	0.00204499	0.00194552	0.00221729	0.920159	0.326486	0.325134	0.347079	High
High	[R].DYYLNK.[T]	1xHexNAc(6)Hex(7)Fuc(1)NeuAc(1) [N5]	1	P42892	P42892 [266-271]	0	3605.39	HexNAc(6)Hex(7)Fuc(1)NeuAc(1)	0	266	3.9	209.3	45	0.000126967	6.47229e-06	0	0	0.308124	0.0357143	0.0355487	0.0400697	High
High	[R].DYYLNK.[T]	1xHexNAc(6)Hex(7)Fuc(1) [N5]	1	P42892	P42892 [266-271]	0	3314.3	HexNAc(6)Hex(7)Fuc(1)	0	266	4.63	186.8	58.6	2.32554e-05	1.55518e-06	0	0	0.0757119	0.0140105	0.013986	0.0156556	High
High	[R].DYYLNK.[T]	1xHexNAc(6)Hex(7)Fuc(1)NeuAc(2) [N5]	1	P42892	P42892 [266-271]	0	3896.49	HexNAc(6)Hex(7)Fuc(1)NeuAc(2)	0	266	5.78	247.7	32	1.66347e-06	1.62681e-07	0	0	0.00584414	0.00478469	0.00470588	0.00524934	High
High	[R].DYYLNK.[T]	1xHexNAc(5)Hex(6)Fuc(1)NeuAc(2) [N5]	2	P42892	P42892 [266-271]	0	3531.36	HexNAc(5)Hex(6)Fuc(1)NeuAc(2)	0	266	6.19	229.2	63.7	6.49126e-07	7.47559e-08	0	0	0.00228868	0.000251958	0	0	High
High	[R].EAGNHTSGAGLVQINK.[S]	1xHexNAc(6)Hex(7)Fuc(1)NeuAc(1) [N4]	1	P20645	P20645 [80-95]	0	4385.81	HexNAc(6)Hex(7)Fuc(1)NeuAc(1)	0	80	2.16	107.8	26.2	0.00695022	0.00407056	0.00385604	0.00473934	0.958174	0.339177	0.338918	0.368859	High
High	[R].EAGNHTSGAGLVQINK.[S]	1xHexNAc(4)Hex(5)Fuc(1) [N4]	1	P20645	P20645 [80-95]	0	3364.45	HexNAc(4)Hex(5)Fuc(1)	0	80	2.84	193	11.1	0.0014549	9.50577e-05	0	0	0.848069	0.248399	0.248082	0.266207	High
High	[R].EAGNHTSGAGLVQINK.[S]	1xHexNAc(5)Hex(6)NeuAc(3) [N4]	1	P20645	P20645 [80-95]	0	4456.81	HexNAc(5)Hex(6)NeuAc(3)	1	80	4.61	157.5	54.8	2.4822e-05	1.75989e-06	0	0	0.0803858	0.015625	0.0155172	0.017341	High
High	[R].EAGNHTSGAGLVQINK.[S]	1xHexNAc(5)Hex(6)Fuc(1)NeuAc(3) [N4]	1	P20645	P20645 [80-95]	0	4602.87	HexNAc(5)Hex(6)Fuc(1)NeuAc(3)	0	80	5.56	209.8	93.2	2.731e-06	2.951e-07	0	0	0.00955875	0.00677201	0.00647948	0.00722891	High
High	[R].EAGNHTSGAGLVQINK.[S]	1xHexNAc(6)Hex(7)Fuc(1)NeuAc(2) [N4]	1	P20645	P20645 [80-95]	0	4676.91	HexNAc(6)Hex(7)Fuc(1)NeuAc(2)	1	80	5.58	202	94.5	2.6391e-06	2.73983e-07	0	0	0.00924006	0.00677201	0.00655022	0.00729927	High
High	[R].EAGNHTSGAGLVQINK.[S]	1xHexNAc(2)Hex(8) [N4]	1	P20645	P20645 [80-95]	0	3298.39	HexNAc(2)Hex(8)	0	80	5.86	243.6	41.2	1.38437e-06	1.63199e-07	0	0	0.00536791	0.00065635	0	0	High
High	[R].EAGNHTSGAGLVQINK.[S]	1xHexNAc(4)Hex(5)Fuc(1)NeuAc(1) [N4]	1	P20645	P20645 [80-95]	0	3655.55	HexNAc(4)Hex(5)Fuc(1)NeuAc(1)	0	80	7.13	516.8	212.9	7.43393e-08	2.33522e-08	0	0	0.000289706	9.26902e-05	0	0	High
High	[R].EAGNHTSGAGLVQINK.[S]	1xHexNAc(4)Hex(5)Fuc(1)NeuAc(2) [N4]	2	P20645	P20645 [80-95]	0	3946.64	HexNAc(4)Hex(5)Fuc(1)NeuAc(2)	0	80	7.21	535	231.4	6.13644e-08	2.10393e-08	0	0	0.000239154	8.35834e-05	0	0	High
High	[R].EAGNHTSGAGLVQINK.[S]	1xHexNAc(4)Hex(5)NeuAc(2) [N4]	1	P20645	P20645 [80-95]	0	3800.59	HexNAc(4)Hex(5)NeuAc(2)	0	80	7.43	319.2	73	3.71551e-08	1.13676e-08	0	0	0.000131284	3.99822e-05	0	0	High
High	[R].EAGNHTSGAGLVQINK.[S]	1xHexNAc(6)Hex(7)Fuc(1)NeuAc(4) [N4]	1	P20645	P20645 [80-95]	0	5259.1	HexNAc(6)Hex(7)Fuc(1)NeuAc(4)	0	80	7.44	327.5	258.6	3.61517e-08	1.08895e-08	0	0	0.000127739	3.82732e-05	0	0	High
High	[R].EAGNHTSGAGLVQINK.[S]	1xHexNAc(5)Hex(6)Fuc(1)NeuAc(1) [N4]	1	P20645	P20645 [80-95]	0	4020.68	HexNAc(5)Hex(6)Fuc(1)NeuAc(1)	1	80	7.92	504	281.7	1.19631e-08	2.57191e-09	0	0	4.66322e-05	1.03068e-05	0	0	High
High	[R].EAGNHTSGAGLVQINK.[S]	1xHexNAc(5)Hex(6)Fuc(1)NeuAc(2) [N4]	2	P20645	P20645 [80-95]	0	4311.78	HexNAc(5)Hex(6)Fuc(1)NeuAc(2)	0	80	8.12	495.6	375.1	7.66302e-09	1.98999e-09	0	0	2.70794e-05	7.07421e-06	0	0	High
High	[R].EASIVGENETYPR.[A]	1xHexNAc(2)Hex(9) [N8]	1	Q9UBV2	Q9UBV2 [601-613]	0	3329.33	HexNAc(2)Hex(9)	0	601	7.32	282.8	161.3	4.77482e-08	1.92323e-08	0	0	0.000186098	7.64798e-05	0	0	High
High	[R].ELAVPDGYTNR.[T]	1xHexNAc(6)Hex(7)Fuc(1) [N10]	1	P26006	P26006 [77-87]	0	3733.51	HexNAc(6)Hex(7)Fuc(1)	0	77	3.58	178.4	59.5	0.000262861	1.67803e-05	0	0	0.503749	0.0914077	0.0897666	0.0964567	High
High	[R].ELAVPDGYTNR.[T]	1xHexNAc(2)Hex(10) [N10]	1	P26006	P26006 [77-87]	0	3261.29	HexNAc(2)Hex(10)	0	77	3.7	102.5	9.1	0.000200032	1.32384e-05	0	0	0.436205	0.0837989	0.0825688	0.0887097	High
High	[R].ELAVPDGYTNR.[T]	1xHexNAc(7)Hex(8)Fuc(1)NeuAc(4) [N10]	1	P26006	P26006 [77-87]	0	5263.02	HexNAc(7)Hex(8)Fuc(1)NeuAc(4)	0	77	3.89	86.6	47.3	0.000127379	6.87149e-06	0	0	0.308813	0.0357143	0.0354391	0.0399305	High
High	[R].ELAVPDGYTNR.[T]	1xHexNAc(7)Hex(8)Fuc(1)NeuAc(1) [N10]	1	P26006	P26006 [77-87]	0	4389.74	HexNAc(7)Hex(8)Fuc(1)NeuAc(1)	1	77	4.58	144.6	67.6	2.64767e-05	1.84773e-06	0	0	0.085271	0.015625	0.0154639	0.0173077	High
High	[R].ELAVPDGYTNR.[T]	1xHexNAc(8)Hex(9)Fuc(1)NeuAc(3) [N10]	1	P26006	P26006 [77-87]	0	5337.06	HexNAc(8)Hex(9)Fuc(1)NeuAc(3)	1	77	5.09	153.9	100	8.0407e-06	6.92514e-07	0	0	0.0304022	0.006006	0.00566572	0.00623053	High
High	[R].ELAVPDGYTNR.[T]	1xHexNAc(6)Hex(7)Fuc(1)NeuAc(1) [N10]	1	P26006	P26006 [77-87]	0	4024.61	HexNAc(6)Hex(7)Fuc(1)NeuAc(1)	0	77	5.2	205.2	64.9	6.33123e-06	6.9039e-07	0	0	0.0218842	0.00677201	0.00575816	0.00643777	High
High	[R].ELAVPDGYTNR.[T]	1xHexNAc(6)Hex(7)Fuc(1)NeuAc(2) [N10]	1	P26006	P26006 [77-87]	0	4315.7	HexNAc(6)Hex(7)Fuc(1)NeuAc(2)	0	77	5.2	206.3	80.1	6.33123e-06	7.01429e-07	0	0	0.0218842	0.00677201	0.00574713	0.00642398	High
High	[R].ELAVPDGYTNR.[T]	1xHexNAc(5)Hex(6)Fuc(1)NeuAc(3) [N10]	2	P26006	P26006 [77-87]	0	4241.66	HexNAc(5)Hex(6)Fuc(1)NeuAc(3)	0	77	6.52	410.9	165.2	2.9908e-07	4.92312e-08	0	0	0.00105579	0.00017231	0	0	High
High	[R].ELAVPDGYTNR.[T]	1xHexNAc(7)Hex(8)Fuc(1)NeuAc(2) [N10]	1	P26006	P26006 [77-87]	0	4680.83	HexNAc(7)Hex(8)Fuc(1)NeuAc(2)	0	77	6.71	266.7	144.8	1.96325e-07	3.83376e-08	0	0	0.000693308	0.000135877	0	0	High
High	[R].ELAVPDGYTNR.[T]	1xHexNAc(5)Hex(6)Fuc(1)NeuAc(2) [N10]	1	P26006	P26006 [77-87]	0	3950.57	HexNAc(5)Hex(6)Fuc(1)NeuAc(2)	0	77	7.1	308.8	118.1	8.0033e-08	2.25975e-08	0	0	0.000282746	7.99802e-05	0	0	High
High	[R].ELAVPDGYTNR.[T]	1xHexNAc(5)Hex(6)Fuc(1)NeuAc(1) [N10]	2	P26006	P26006 [77-87]	0	3659.47	HexNAc(5)Hex(6)Fuc(1)NeuAc(1)	0	77	7.12	330.9	119.7	7.66993e-08	2.18065e-08	0	0	0.000270972	7.71684e-05	0	0	High
High	[R].ELAVPDGYTNR.[T]	1xHexNAc(4)Hex(5)Fuc(1)NeuAc(1) [N10]	1	P26006	P26006 [77-87]	0	3294.34	HexNAc(4)Hex(5)Fuc(1)NeuAc(1)	0	77	7.3	352.7	190	5.00782e-08	1.56408e-08	0	0	0.000176939	5.52272e-05	0	0	High
High	[R].ELAVPDGYTNR.[T]	1xHexNAc(2)Hex(9) [N10]	1	P26006	P26006 [77-87]	0	3099.24	HexNAc(2)Hex(9)	0	77	7.3	390.5	240.3	5.00383e-08	1.55014e-08	0	0	0.000176798	5.47304e-05	0	0	High
High	[R].ELAVPDGYTNR.[T]	1xHexNAc(6)Hex(7)Fuc(1)NeuAc(3) [N10]	2	P26006	P26006 [77-87]	0	4606.8	HexNAc(6)Hex(7)Fuc(1)NeuAc(3)	0	77	7.33	418.1	227.9	4.68795e-08	1.42389e-08	0	0	0.000165639	5.02304e-05	0	0	High
High	[R].ELAVPDGYTNR.[T]	1xHexNAc(7)Hex(8)Fuc(1)NeuAc(3) [N10]	1	P26006	P26006 [77-87]	0	4971.93	HexNAc(7)Hex(8)Fuc(1)NeuAc(3)	0	77	7.44	240.5	119.3	3.62249e-08	1.45339e-08	0	0	0.000141192	5.79941e-05	0	0	High
High	[R].ELAVPDGYTNR.[T]	1xHexNAc(4)Hex(5)Fuc(1)NeuAc(2) [N10]	1	P26006	P26006 [77-87]	0	3585.44	HexNAc(4)Hex(5)Fuc(1)NeuAc(2)	0	77	7.55	369.8	167.7	2.83584e-08	1.1162e-08	0	0	0.000110535	4.46943e-05	0	0	High
High	[R].ENATVPENEEEIIR.[K]	1xHexNAc(2)Hex(8) [N2]	1	Q8IWB1	Q8IWB1 [26-39]	0	3345.37	HexNAc(2)Hex(8)	0	26	7.89	362.9	208.2	1.29764e-08	3.53559e-09	0	0	4.58549e-05	1.25676e-05	0	0	High
High	[R].EQQLESCACNETDNSCK.[V]	3xCarbamidomethyl [C7; C9; C16]; 1xHexNAc(2)Hex(7) [N10]	1	P78536	P78536 [585-601]	0	3613.32	HexNAc(2)Hex(7)	0	585	2.17	165.1	76.4	0.00674947	0.00204499	0.0018315	0.00209205	0.0168671	0.00321543	0.00306748	0.0033557	High
High	[R].FANEYPNITR.[L]	1xHexNAc(5)Hex(5)Fuc(1)NeuAc(2) [N7]	1	O75976	O75976 [516-525]	0	3778.51	HexNAc(5)Hex(5)Fuc(1)NeuAc(2)	0	516	2.66	88.5	36.1	0.00218975	0.00294551	0.0027972	0.00337838	0.881408	0.228628	0.227723	0.25	High
High	[R].FANEYPNITR.[L]	1xHexNAc(4)Hex(5)Fuc(1)NeuAc(1) [N7]	1	O75976	O75976 [516-525]	0	3284.34	HexNAc(4)Hex(5)Fuc(1)NeuAc(1)	0	516	7.28	268.1	112.9	5.24496e-08	1.63569e-08	0	0	0.000185316	5.77782e-05	0	0	High
High	[R].FANEYPNITR.[L]	1xHexNAc(4)Hex(5)Fuc(1)NeuAc(2) [N7]	1	O75976	O75976 [516-525]	0	3575.43	HexNAc(4)Hex(5)Fuc(1)NeuAc(2)	0	516	7.64	438.7	205.2	2.30993e-08	6.1662e-09	0	0	8.16233e-05	2.1904e-05	0	0	High
High	[R].FINYNQTVSR.[M]	1xHexNAc(2)Hex(8) [N5]	1	Q8N766	Q8N766 [909-918]	0	2944.21	HexNAc(2)Hex(8)	0	909	4.27	202	33.4	5.31912e-05	2.9729e-06	0	0	0.157487	0.0198675	0.0198347	0.0222634	High
High	[R].FINYNQTVSR.[M]	1xHexNAc(2)Hex(9) [N5]	1	Q8N766	Q8N766 [909-918]	0	3106.26	HexNAc(2)Hex(9)	0	909	7.85	491	181.9	1.41973e-08	3.88593e-09	0	0	5.01688e-05	1.38117e-05	0	0	High
High	[R].GDKNVTMGQSSAR.[M]	1xHexNAc(5)Hex(6)Fuc(1)NeuAc(2) [N4]	1	P48960	P48960 [368-380]	1	4066.61	HexNAc(5)Hex(6)Fuc(1)NeuAc(2)	1	368	5.37	248.2	36.3	4.31015e-06	5.35232e-07	0	0	0.0150031	0.00677201	0.00596421	0.00669643	High
High	[R].GDKNVTMGQSSAR.[M]	1xHexNAc(4)Hex(5)Fuc(1)NeuAc(1) [N4]	1	P48960	P48960 [368-380]	1	3410.38	HexNAc(4)Hex(5)Fuc(1)NeuAc(1)	0	368	5.82	370.4	124.9	1.52565e-06	1.4547e-07	0	0	0.00536253	0.00478469	0.0047619	0.00530504	High
High	[R].GHTLTLNFTR.[N]	1xHexNAc(2)Hex(7) [N7]	1	P11279	P11279 [97-106]	0	2700.15	HexNAc(2)Hex(7)	0	97	5.73	228.4	100.3	1.85873e-06	1.95715e-07	0	0	0.00652565	0.00478469	0.0045977	0.00511509	High
High	[R].GLGMNNLPSNYTAR.[M]	1xDeamidated [N5]; 1xHexNAc(4)Hex(4)Fuc(1)NeuAc(1) [N10]	1	Q2KHR2	Q2KHR2 [1170-1183]	0	3406.4	HexNAc(4)Hex(4)Fuc(1)NeuAc(1)	0	1170	2.47	251.6	12.9	0.00337374	0.00204499	0.00191939	0.00218818	0.00843107	0.00116146	0	0	High
High	[R].GNCTYVLMR.[E]	1xCarbamidomethyl [C3]; 1xHexNAc(5)Hex(6)NeuAc(2) [N2]	1	Q9HC84	Q9HC84 [5095-5103]	0	3683.42	HexNAc(5)Hex(6)NeuAc(2)	0	5095	2.88	239.1	18.3	0.00133026	0.00294551	0.00292826	0.00353982	0.00664372	0.00478469	0.00457666	0.00508906	High
High	[R].GPGIKPNQTSK.[M]	1xHexNAc(2)Hex(9) [N7]	1	P15586	P15586 [356-366]	0	2991.26	HexNAc(2)Hex(9)	0	356	2.32	151.5	19.9	0.0047404	0.00407056	0.00404313	0.00494234	0.939742	0.284201	0.283217	0.309021	High
High	[R].GPGIKPNQTSK.[M]	1xHexNAc(2)Hex(8) [N7]	1	P15586	P15586 [356-366]	0	2829.2	HexNAc(2)Hex(8)	0	356	6.49	251.2	165.4	3.22837e-07	7.03307e-08	0	0	0.00125692	0.000277378	0	0	High
High	[R].GPGIKPNQTSK.[M]	1xHexNAc(2)Hex(7) [N7]	1	P15586	P15586 [356-366]	0	2667.15	HexNAc(2)Hex(7)	0	356	6.7	313.6	131.1	1.9872e-07	3.88012e-08	0	0	0.000701757	0.000137522	0	0	High
High	[R].GYYNQSEAGSHTVQR.[M]	1xDeamidated [Q14]; 1xHexNAc(5)Hex(6)NeuAc(3) [N4]	1	P01892	P01892 [107-121]	0	4558.75	HexNAc(5)Hex(6)NeuAc(3)	0	107	2.29	161	45.5	0.00513426	0.00204499	0.00184843	0.00210526	0.951643	0.405074	0.404367	0.427644	High
High	[R].GYYNQSEAGSHTVQR.[M]	1xHexNAc(8)Hex(9) [N4]	1	P01892	P01892 [107-121]	0	4779.88	HexNAc(8)Hex(9)	0	107	4.05	198.7	63.6	8.96628e-05	7.03965e-06	0	0	0.258157	0.0600414	0.0595482	0.0627803	High
High	[R].GYYNQSEAGSHTVQR.[M]	1xHexNAc(5)Hex(6)Fuc(1)NeuAc(2) [N4]; 1xDeamidated [Q14]	1	P01892	P01892 [107-121]	0	4413.71	HexNAc(5)Hex(6)Fuc(1)NeuAc(2)	0	107	4.51	101.2	37.6	3.0756e-05	2.03864e-06	0	0	0.0976662	0.015625	0.0153846	0.0172084	High
High	[R].GYYNQSEAGSHTVQR.[M]	1xHexNAc(4)Hex(5)Fuc(1) [N4]	1	P01892	P01892 [107-121]	0	3465.41	HexNAc(4)Hex(5)Fuc(1)	0	107	5.31	215.9	61.7	4.8922e-06	5.91747e-07	0	0	0.0169947	0.00677201	0.00587084	0.00657895	High
High	[R].GYYNQSEAGSHTVQR.[M]	1xHexNAc(4)Hex(5)Fuc(1)NeuAc(2) [N4]	1	P01892	P01892 [107-121]	0	4047.6	HexNAc(4)Hex(5)Fuc(1)NeuAc(2)	1	107	6.63	342.3	174.3	2.34024e-07	5.96725e-08	0	0	0.000911449	0.000235512	0	0	High
High	[R].GYYNQSEAGSHTVQR.[M]	1xHexNAc(6)Hex(7)Fuc(1)NeuAc(2) [N4]	1	P01892	P01892 [107-121]	0	4777.86	HexNAc(6)Hex(7)Fuc(1)NeuAc(2)	1	107	6.92	257.3	137.4	1.19981e-07	3.69663e-08	0	0	0.000467492	0.000146291	0	0	High
High	[R].GYYNQSEAGSHTVQR.[M]	1xHexNAc(5)Hex(6)Fuc(1)NeuAc(1) [N4]	1	P01892	P01892 [107-121]	0	4121.63	HexNAc(5)Hex(6)Fuc(1)NeuAc(1)	0	107	6.95	244	101.5	1.1247e-07	2.82999e-08	0	0	0.000397296	0.000100242	0	0	High
High	[R].GYYNQSEAGSHTVQR.[M]	1xHexNAc(2)Hex(10) [N4]	1	P01892	P01892 [107-121]	0	3723.45	HexNAc(2)Hex(10)	0	107	7.95	405.6	229.9	1.12163e-08	3.06587e-09	0	0	3.96354e-05	1.0899e-05	0	0	High
High	[R].GYYNQSEAGSHTVQR.[M]	1xHexNAc(2)Hex(9) [N4]	1	P01892	P01892 [107-121]	0	3561.4	HexNAc(2)Hex(9)	0	107	8.23	478.9	301.4	5.90978e-09	1.48411e-09	0	0	2.0884e-05	5.27342e-06	0	0	High
High	[R].HNTTSQNVSK.[R]	1xHexNAc(4)Hex(4)NeuAc(1) [N7]; 1xHexNAc(3)Hex(4)NeuAc(1) [N2]	2	Q96EV2	Q96EV2 [683-692]	0	4415.71	HexNAc(3)Hex(4)NeuAc(1); HexNAc(4)Hex(4)NeuAc(1)	0	683	1.52	130.5	33.2	0.0302045	0.00483092	0.00480769	0.00594354	0.0377528	0.00736648	0.00722022	0.00808081	High
High	[R].IAPASNVSHTVVLR.[P]	1xHexNAc(2)Hex(9) [N6]	1	P43308	P43308 [83-96]	0	3328.47	HexNAc(2)Hex(9)	0	83	1.35	145.8	30.3	0.0442221	0.0083632	0.00833333	0.0102941	0.0552735	0.0124334	0.0124113	0.0138889	High
High	[R].IDINMSGFNETDDLK.[R]	1xHexNAc(4)Hex(3)NeuAc(1) [N4]; 1xHexNAc(2)Hex(4)Fuc(1) [N9]	1	P13797	P13797 [321-335]	0	4501.78	HexNAc(4)Hex(3)NeuAc(1); HexNAc(2)Hex(4)Fuc(1)	0	321	4.17	100.5	10	6.83294e-05	3.71638e-06	0	0	0.193536	0.0275081	0.0274636	0.0307971	High
High	[R].IGTFCSNGTVSR.[I]	1xCarbamidomethyl [C5]; 1xHexNAc(5)Hex(6)NeuAc(2) [N7]	1	Q9H5V8	Q9H5V8 [174-185]	0	3868.52	HexNAc(5)Hex(6)NeuAc(2)	0	174	6.18	234.8	40.6	6.68109e-07	7.62773e-08	0	0	0.00235545	0.000257436	0	0	High
High	[R].INTTADEKDPTNPFR.[F]	1xHexNAc(2)Hex(9) [N2]	1	O14672	O14672 [277-291]	1	3583.47	HexNAc(2)Hex(9)	0	277	6.44	396.8	221.4	3.61144e-07	7.80516e-08	0	0	0.00140585	0.0003077	0	0	High
High	[R].IVSPEPGGAVGPNLTCR.[W]	1xCarbamidomethyl [C16]; 1xHexNAc(5)Hex(6)Fuc(1)NeuAc(3) [N13]	1	Q6UXD5	Q6UXD5 [361-377]	0	4730.94	HexNAc(5)Hex(6)Fuc(1)NeuAc(3)	0	361	8.25	522.4	342.5	5.59338e-09	1.44029e-09	0	0	1.97659e-05	5.11731e-06	0	0	High
High	[R].KDNTTVTR.[L]	1xHexNAc(7)Hex(8)Fuc(1) [N3]	1	P11279	P11279 [247-254]	1	3798.53	HexNAc(7)Hex(8)Fuc(1)	0	247	2.86	143.4	15.4	0.00136719	0.00294551	0.00291545	0.00352734	0.824115	0.133492	0.132544	0.147952	High
High	[R].KDNTTVTR.[L]	1xHexNAc(4)Hex(5)Fuc(1)NeuAc(2) [N3]	2	P11279	P11279 [247-254]	1	3285.33	HexNAc(4)Hex(5)Fuc(1)NeuAc(2)	0	247	4.99	229	17.9	1.01592e-05	1.03982e-06	0	0	0.0346573	0.00736648	0.00728597	0.00814664	High
High	[R].KDNTTVTR.[L]	1xHexNAc(5)Hex(6)Fuc(1)NeuAc(3) [N3]	1	P11279	P11279 [247-254]	1	3941.55	HexNAc(5)Hex(6)Fuc(1)NeuAc(3)	0	247	5.75	293.4	32.5	1.76887e-06	2.21523e-07	0	0	0.00684872	0.000919459	0	0	High
High	[R].KDNTTVTR.[L]	1xHexNAc(5)Hex(6)Fuc(1) [N3]	1	P11279	P11279 [247-254]	1	3068.27	HexNAc(5)Hex(6)Fuc(1)	0	247	5.81	254.8	46.5	1.55416e-06	1.90212e-07	0	0	0.00602235	0.000760923	0	0	High
High	[R].KDNTTVTR.[L]	1xHexNAc(4)Hex(5)Fuc(1) [N3]	1	P11279	P11279 [247-254]	1	2703.13	HexNAc(4)Hex(5)Fuc(1)	0	247	6.05	299.9	68.1	9.00978e-07	1.28803e-07	0	0	0.00350004	0.000523197	0	0	High
High	[R].KDNTTVTR.[L]	1xHexNAc(4)Hex(5)Fuc(1)NeuAc(1) [N3]	1	P11279	P11279 [247-254]	1	2994.23	HexNAc(4)Hex(5)Fuc(1)NeuAc(1)	0	247	6.12	331.2	50.9	7.67117e-07	9.43342e-08	0	0	0.00270357	0.000316695	0	0	High
High	[R].KDNTTVTR.[L]	1xHexNAc(5)Hex(6)Fuc(1)NeuAc(2) [N3]	2	P11279	P11279 [247-254]	1	3650.46	HexNAc(5)Hex(6)Fuc(1)NeuAc(2)	0	247	6.63	246.1	92.2	2.32244e-07	4.48037e-08	0	0	0.000820046	0.00015882	0	0	High
High	[R].KDNTTVTR.[L]	1xHexNAc(5)Hex(6)Fuc(1)NeuAc(1) [N3]	1	P11279	P11279 [247-254]	1	3359.36	HexNAc(5)Hex(6)Fuc(1)NeuAc(1)	0	247	7.38	386.4	105.3	4.12957e-08	1.23591e-08	0	0	0.000145913	4.35238e-05	0	0	High
High	[R].KENSSEICSNNGECVCGQCVCR.[K]	5xCarbamidomethyl [C8; C14; C16; C19; C21]; 1xHexNAc(7)Hex(8)NeuAc(1) [N3]	1	P05556	P05556 [518-539]	1	5656.12	HexNAc(7)Hex(8)NeuAc(1)	0	518	4.29	86.2	46.8	5.12475e-05	2.63002e-06	0	0	0.152623	0.0167224	0.0166667	0.0187266	High
High	[R].KENSSEICSNNGECVCGQCVCR.[K]	5xCarbamidomethyl [C8; C14; C16; C19; C21]; 1xHexNAc(6)Hex(7)Fuc(1) [N3]	1	P05556	P05556 [518-539]	1	5145.95	HexNAc(6)Hex(7)Fuc(1)	0	518	5.35	193.4	93.8	4.4566e-06	3.52489e-07	0	0	0.0170794	0.00321543	0.0030581	0.00334448	High
High	[R].KENSSEICSNNGECVCGQCVCR.[K]	5xCarbamidomethyl [C8; C14; C16; C19; C21]; 1xHexNAc(2)Hex(6) [N3]	1	P05556	P05556 [518-539]	1	4025.52	HexNAc(2)Hex(6)	0	518	5.71	106	47.3	1.95732e-06	2.38219e-07	0	0	0.00757289	0.0010041	0	0	High
High	[R].KENSSEICSNNGECVCGQCVCR.[K]	5xCarbamidomethyl [C8; C14; C16; C19; C21]; 1xHexNAc(6)Hex(7)Fuc(1)NeuAc(4) [N3]	1	P05556	P05556 [518-539]	1	6310.33	HexNAc(6)Hex(7)Fuc(1)NeuAc(4)	1	518	8.08	241.8	169.2	8.39364e-09	2.29211e-09	0	0	2.96612e-05	8.14876e-06	0	0	High
High	[R].KENSSEICSNNGECVCGQCVCR.[K]	5xCarbamidomethyl [C8; C14; C16; C19; C21]; 1xHexNAc(5)Hex(6)Fuc(1)NeuAc(3) [N3]	1	P05556	P05556 [518-539]	1	5654.1	HexNAc(5)Hex(6)Fuc(1)NeuAc(3)	0	518	8.22	330.5	219.5	6.04949e-09	1.52843e-09	0	0	2.13777e-05	5.4313e-06	0	0	High
High	[R].KENSSEICSNNGECVCGQCVCR.[K]	5xCarbamidomethyl [C8; C14; C16; C19; C21]; 1xHexNAc(6)Hex(7)Fuc(1)NeuAc(2) [N3]	2	P05556	P05556 [518-539]	1	5728.14	HexNAc(6)Hex(7)Fuc(1)NeuAc(2)	0	518	8.26	368.4	173.1	5.47277e-09	1.39876e-09	0	0	1.93397e-05	4.96935e-06	0	0	High
High	[R].KENSSEICSNNGECVCGQCVCR.[K]	5xCarbamidomethyl [C8; C14; C16; C19; C21]; 1xHexNAc(5)Hex(6)Fuc(1)NeuAc(2) [N3]	1	P05556	P05556 [518-539]	1	5363	HexNAc(5)Hex(6)Fuc(1)NeuAc(2)	0	518	8.52	401.7	312.1	3.01448e-09	6.5363e-10	0	0	1.06527e-05	2.30956e-06	0	0	High
High	[R].KENSSEICSNNGECVCGQCVCR.[K]	5xCarbamidomethyl [C8; C14; C16; C19; C21]; 1xHexNAc(2)Hex(8) [N3]	2	P05556	P05556 [518-539]	1	4349.62	HexNAc(2)Hex(8)	0	518	9.1	562.1	342.8	7.89848e-10	1.52433e-10	0	0	2.79121e-06	5.04853e-07	0	0	High
High	[R].LKPLFNK.[S]	1xHexNAc(2)Hex(8) [N6]	1	P20645	P20645 [52-58]	0	2562.12	HexNAc(2)Hex(8)	0	52	6.71	269.2	174.9	1.94241e-07	3.742e-08	0	0	0.00068595	0.00013262	0	0	High
High	[R].LLNINPNK.[T]	1xHexNAc(7)Hex(8)Fuc(1)NeuAc(3) [N7]	1	P11279	P11279 [255-262]	0	4662.87	HexNAc(7)Hex(8)Fuc(1)NeuAc(3)	0	255	1.3	35.8	6	0.0497774	0.0083632	0.00824499	0.0102041	0.99281	0.444271	0.442887	0.467814	High
High	[R].LLNINPNK.[T]	1xHexNAc(5)Hex(6)NeuAc(1) [N7]	1	P11279	P11279 [255-262]	0	3204.36	HexNAc(5)Hex(6)NeuAc(1)	0	255	2.28	158.1	26.1	0.00528801	0.00407056	0.00394218	0.00482315	0.945673	0.317524	0.317269	0.345646	High
High	[R].LLNINPNK.[T]	1xHexNAc(6)Hex(7)NeuAc(4) [N7]	1	P11279	P11279 [255-262]	0	4442.77	HexNAc(6)Hex(7)NeuAc(4)	1	255	2.3	123.3	4.3	0.00506622	0.00407056	0.00395778	0.00484653	0.943417	0.312039	0.311784	0.339606	High
High	[R].LLNINPNK.[T]	1xHexNAc(2)Hex(8) [N7]	1	P11279	P11279 [255-262]	0	2628.13	HexNAc(2)Hex(8)	0	255	2.33	69.3	24.8	0.00468851	0.00407056	0.00404858	0.00495049	0.939113	0.284201	0.283951	0.310077	High
High	[R].LLNINPNK.[T]	1xHexNAc(5)Hex(6)NeuAc(2) [N7]	1	P11279	P11279 [255-262]	0	3495.45	HexNAc(5)Hex(6)NeuAc(2)	0	255	2.53	162.4	23.6	0.0029295	0.00204499	0.00196464	0.00224215	0.917905	0.319196	0.318485	0.340502	High
High	[R].LLNINPNK.[T]	1xHexNAc(3)Hex(6)Fuc(1)NeuAc(1) [N7]	1	P11279	P11279 [255-262]	0	2944.25	HexNAc(3)Hex(6)Fuc(1)NeuAc(1)	0	255	2.68	53.3	8.8	0.00209662	0.00294551	0.00280505	0.00338983	0.876724	0.220766	0.220322	0.243333	High
High	[R].LLNINPNK.[T]	1xHexNAc(8)Hex(9)Fuc(1) [N7]	1	P11279	P11279 [255-262]	0	4154.71	HexNAc(8)Hex(9)Fuc(1)	1	255	2.69	61.7	9.5	0.00205648	0.00294551	0.00283286	0.00341297	0.874529	0.187633	0.187234	0.207303	High
High	[R].LLNINPNK.[T]	1xHexNAc(6)Hex(7)Fuc(1)NeuAc(3) [N7]	1	P11279	P11279 [255-262]	0	4297.74	HexNAc(6)Hex(7)Fuc(1)NeuAc(3)	1	255	2.86	92.5	13.9	0.00137652	0.00294551	0.00290276	0.00350877	0.825082	0.134189	0.133877	0.149157	High
High	[R].LLNINPNK.[T]	1xHexNAc(7)Hex(8) [N7]	1	P11279	P11279 [255-262]	0	3643.52	HexNAc(7)Hex(8)	0	255	3.9	184.1	48.6	0.000126485	9.24216e-06	0	0	0.329056	0.066	0.0652174	0.0695652	High
High	[R].LLNINPNK.[T]	1xHexNAc(7)Hex(8)Fuc(1)NeuAc(2) [N7]	1	P11279	P11279 [255-262]	0	4371.77	HexNAc(7)Hex(8)Fuc(1)NeuAc(2)	1	255	4.11	102.3	33.1	7.82952e-05	4.28695e-06	0	0	0.215634	0.0288461	0.0287081	0.0322004	High
High	[R].LLNINPNK.[T]	1xHexNAc(3)Hex(6) [N7]	1	P11279	P11279 [255-262]	0	2507.1	HexNAc(3)Hex(6)	0	255	4.87	165.7	78.3	1.34298e-05	1.19901e-06	0	0	0.0497758	0.018617	0.0182292	0.02	High
High	[R].LLNINPNK.[T]	1xHexNAc(3)Hex(6)NeuAc(1) [N7]	1	P11279	P11279 [255-262]	0	2798.2	HexNAc(3)Hex(6)NeuAc(1)	0	255	4.94	206	46.2	1.15705e-05	1.15266e-06	0	0	0.0392828	0.0089928	0.00896057	0.01002	High
High	[R].LLNINPNK.[T]	1xHexNAc(6)Hex(7) [N7]	1	P11279	P11279 [255-262]	0	3278.39	HexNAc(6)Hex(7)	0	255	4.94	209.8	46.6	1.15705e-05	1.1333e-06	0	0	0.0392828	0.0089928	0.00897666	0.0100402	High
High	[R].LLNINPNK.[T]	1xHexNAc(4)Hex(5)NeuAc(1) [N7]	2	P11279	P11279 [255-262]	0	2839.22	HexNAc(4)Hex(5)NeuAc(1)	0	255	5.02	194.4	57.1	9.59131e-06	9.56114e-07	0	0	0.0327835	0.00677201	0.00552486	0.00618557	High
High	[R].LLNINPNK.[T]	1xHexNAc(6)Hex(7)Fuc(1)NeuAc(1) [N7]	1	P11279	P11279 [255-262]	0	3715.55	HexNAc(6)Hex(7)Fuc(1)NeuAc(1)	0	255	5.02	194.8	34.2	9.59131e-06	9.39728e-07	0	0	0.0327835	0.00677201	0.00553505	0.00619835	High
High	[R].LLNINPNK.[T]	1xHexNAc(5)Hex(6) [N7]	1	P11279	P11279 [255-262]	0	2913.26	HexNAc(5)Hex(6)	0	255	5.43	206.4	74.4	3.74232e-06	4.09643e-07	0	0	0.0130523	0.00677201	0.00617284	0.00689655	High
High	[R].LLNINPNK.[T]	1xHexNAc(6)Hex(7)Fuc(1) [N7]	1	P11279	P11279 [255-262]	0	3424.45	HexNAc(6)Hex(7)Fuc(1)	0	255	5.43	228.4	79.7	3.74232e-06	4.02627e-07	0	0	0.0130523	0.00677201	0.00618557	0.00691244	High
High	[R].LLNINPNK.[T]	1xHexNAc(7)Hex(8)Fuc(1)NeuAc(1) [N7]	2	P11279	P11279 [255-262]	0	4080.68	HexNAc(7)Hex(8)Fuc(1)NeuAc(1)	0	255	5.43	175.4	67.2	3.73511e-06	3.81424e-07	0	0	0.0130275	0.00677201	0.00622407	0.00694444	High
High	[R].LLNINPNK.[T]	1xHexNAc(4)Hex(5)Fuc(1) [N7]	1	P11279	P11279 [255-262]	0	2694.19	HexNAc(4)Hex(5)Fuc(1)	0	255	5.71	213.4	92.5	1.93712e-06	2.03618e-07	0	0	0.00679899	0.00478469	0.00454545	0.0050505	High
High	[R].LLNINPNK.[T]	1xHexNAc(6)Hex(7)Fuc(1)NeuAc(2) [N7]	1	P11279	P11279 [255-262]	0	4006.64	HexNAc(6)Hex(7)Fuc(1)NeuAc(2)	0	255	6.48	243.8	31.9	3.27393e-07	5.35141e-08	0	0	0.00115563	0.000187576	0	0	High
High	[R].LLNINPNK.[T]	1xHexNAc(5)Hex(6)Fuc(1)NeuAc(2) [N7]	1	P11279	P11279 [255-262]	0	3641.51	HexNAc(5)Hex(6)Fuc(1)NeuAc(2)	0	255	6.98	251.2	71.2	1.0591e-07	2.64505e-08	0	0	0.000374133	9.36722e-05	0	0	High
High	[R].LLNINPNK.[T]	1xHexNAc(7)Hex(8)Fuc(1) [N7]	1	P11279	P11279 [255-262]	0	3789.58	HexNAc(7)Hex(8)Fuc(1)	0	255	7.2	264.8	110.5	6.32697e-08	1.95389e-08	0	0	0.000223537	6.91042e-05	0	0	High
High	[R].LLNINPNK.[T]	1xHexNAc(4)Hex(5)Fuc(1)NeuAc(2) [N7]	2	P11279	P11279 [255-262]	0	3276.38	HexNAc(4)Hex(5)Fuc(1)NeuAc(2)	0	255	7.25	247.5	116.6	5.6007e-08	1.81911e-08	0	0	0.000197882	6.43086e-05	0	0	High
High	[R].LLNINPNK.[T]	1xHexNAc(6)Hex(7)NeuAc(1) [N7]	1	P11279	P11279 [255-262]	0	3569.49	HexNAc(6)Hex(7)NeuAc(1)	0	255	7.27	284.3	117	5.35812e-08	1.74847e-08	0	0	0.000189313	6.17943e-05	0	0	High
High	[R].LLNINPNK.[T]	1xHexNAc(5)Hex(6)Fuc(1)NeuAc(1) [N7]	2	P11279	P11279 [255-262]	0	3350.41	HexNAc(5)Hex(6)Fuc(1)NeuAc(1)	0	255	7.39	334.2	178.6	4.06685e-08	1.22294e-08	0	0	0.000143697	4.30605e-05	0	0	High
High	[R].LLNINPNK.[T]	1xHexNAc(5)Hex(6)Fuc(1) [N7]	1	P11279	P11279 [255-262]	0	3059.32	HexNAc(5)Hex(6)Fuc(1)	0	255	7.41	302.3	117.5	3.92188e-08	1.19759e-08	0	0	0.000138575	4.21553e-05	0	0	High
High	[R].LLNINPNK.[T]	1xHexNAc(4)Hex(5)Fuc(1)NeuAc(1) [N7]	2	P11279	P11279 [255-262]	0	2985.28	HexNAc(4)Hex(5)Fuc(1)NeuAc(1)	0	255	7.42	324.7	119.4	3.75852e-08	1.16068e-08	0	0	0.000132804	4.08369e-05	0	0	High
High	[R].LNPTVTYGNDSFSAK.[A]	1xHexNAc(8)Hex(9)Fuc(1)NeuAc(4) [N9]	1	P05362	P05362 [259-273]	0	6007.33	HexNAc(8)Hex(9)Fuc(1)NeuAc(4)	1	259	3.57	59.1	21	0.000268311	1.73585e-05	0	0	0.508849	0.0914077	0.0896057	0.0962672	High
High	[R].LNPTVTYGNDSFSAK.[A]	1xHexNAc(6)Hex(7)Fuc(1)NeuAc(1) [N9]	1	P05362	P05362 [259-273]	0	4403.78	HexNAc(6)Hex(7)Fuc(1)NeuAc(1)	0	259	4.29	148.3	5.1	5.13066e-05	2.71482e-06	0	0	0.152771	0.0183028	0.0182724	0.0205224	High
High	[R].LNPTVTYGNDSFSAK.[A]	1xHexNAc(6)Hex(7)Fuc(1)NeuAc(4) [N9]	1	P05362	P05362 [259-273]	0	5277.07	HexNAc(6)Hex(7)Fuc(1)NeuAc(4)	-1	259	6.93	273.7	202.7	1.17791e-07	2.88628e-08	0	0	0.000416086	0.000102241	0	0	High
High	[R].LNPTVTYGNDSFSAK.[A]	1xHexNAc(7)Hex(8)Fuc(1)NeuAc(4) [N9]	1	P05362	P05362 [259-273]	0	5642.2	HexNAc(7)Hex(8)Fuc(1)NeuAc(4)	-1	259	6.93	281	215.1	1.17791e-07	2.85822e-08	0	0	0.000416086	0.000101244	0	0	High
High	[R].LNPTVTYGNDSFSAK.[A]	1xHexNAc(4)Hex(5)Fuc(1)NeuAc(2) [N9]	1	P05362	P05362 [259-273]	0	3964.61	HexNAc(4)Hex(5)Fuc(1)NeuAc(2)	0	259	7.04	427.4	189	9.22242e-08	2.62814e-08	0	0	0.00035938	0.000104233	0	0	High
High	[R].LNPTVTYGNDSFSAK.[A]	1xHexNAc(5)Hex(6)Fuc(1)NeuAc(2) [N9]	1	P05362	P05362 [259-273]	0	4329.74	HexNAc(5)Hex(6)Fuc(1)NeuAc(2)	0	259	7.2	491.5	256.6	6.30521e-08	2.15856e-08	0	0	0.00024573	8.57342e-05	0	0	High
High	[R].LNSSTIK.[Y]	1xHexNAc(6)Hex(7)NeuAc(1) [N2]	2	P13473	P13473 [274-280]	0	3406.38	HexNAc(6)Hex(7)NeuAc(1)	0	274	1.97	176	17.2	0.0108034	0.00407056	0.00374065	0.00460829	0.972547	0.380921	0.380671	0.406828	High
High	[R].LNSSTIK.[Y]	1xHexNAc(3)Hex(6)NeuAc(1) [N2]	1	P13473	P13473 [274-280]	0	2635.09	HexNAc(3)Hex(6)NeuAc(1)	0	274	2.3	151.5	0.5	0.00504613	0.00204499	0.00185185	0.0021097	0.950837	0.399645	0.398583	0.421449	High
High	[R].LNSSTIK.[Y]	1xHexNAc(4)Hex(5)Fuc(1)NeuAc(1) [N2]	1	P13473	P13473 [274-280]	0	2822.17	HexNAc(4)Hex(5)Fuc(1)NeuAc(1)	0	274	2.91	169	8.2	0.00124328	8.72045e-05	0	0	0.826897	0.239843	0.238903	0.2567	High
High	[R].LNSSTIK.[Y]	1xHexNAc(5)Hex(6)NeuAc(2) [N2]	1	P13473	P13473 [274-280]	0	3332.34	HexNAc(5)Hex(6)NeuAc(2)	0	274	3.52	242.6	1.7	0.000300256	1.75521e-05	0	0	0.512064	0.0750341	0.0744249	0.0840978	High
High	[R].LNSSTIK.[Y]	1xHexNAc(6)Hex(7)NeuAc(2) [N2]	1	P13473	P13473 [274-280]	0	3697.47	HexNAc(6)Hex(7)NeuAc(2)	0	274	4.1	234	21	7.85695e-05	4.41285e-06	0	0	0.216225	0.0288461	0.0286624	0.0321429	High
High	[R].LNSSTIK.[Y]	1xHexNAc(6)Hex(7)Fuc(1)NeuAc(2) [N2]	1	P13473	P13473 [274-280]	0	3843.53	HexNAc(6)Hex(7)Fuc(1)NeuAc(2)	0	274	4.72	246.3	9.1	1.8846e-05	1.68995e-06	0	0	0.0683982	0.0233161	0.02267	0.0248619	High
High	[R].LNSSTIK.[Y]	1xHexNAc(5)Hex(6) [N2]	1	P13473	P13473 [274-280]	0	2750.15	HexNAc(5)Hex(6)	0	274	4.89	235.1	9.6	1.29522e-05	1.12892e-06	0	0	0.04809	0.018617	0.018421	0.0202312	High
High	[R].LNSSTIK.[Y]	1xHexNAc(4)Hex(5)NeuAc(1) [N2]	1	P13473	P13473 [274-280]	0	2676.11	HexNAc(4)Hex(5)NeuAc(1)	0	274	5.17	301.9	8.9	6.73427e-06	7.13212e-07	0	0	0.023245	0.00677201	0.00572519	0.00639659	High
High	[R].LNSSTIK.[Y]	1xHexNAc(5)Hex(6)Fuc(1)NeuAc(1) [N2]	1	P13473	P13473 [274-280]	0	3187.3	HexNAc(5)Hex(6)Fuc(1)NeuAc(1)	0	274	5.25	243.1	23.7	5.66597e-06	4.53694e-07	0	0	0.0216151	0.006006	0.00595238	0.00651466	High
High	[R].MNITVK.[N]	1xHexNAc(6)Hex(7)Fuc(1)NeuAc(3) [N2]	1	P26006	P26006 [106-111]	0	4077.59	HexNAc(6)Hex(7)Fuc(1)NeuAc(3)	0	106	1.97	119.4	0.5	0.0108034	0.00407056	0.00373599	0.00460123	0.972547	0.380921	0.379672	0.405674	High
High	[R].MNITVK.[N]	1xHexNAc(4)Hex(5)Fuc(1)NeuAc(2) [N2]	1	P26006	P26006 [106-111]	0	3056.23	HexNAc(4)Hex(5)Fuc(1)NeuAc(2)	0	106	2.31	188.5	2.7	0.00494844	0.00407056	0.00397878	0.00487805	0.942142	0.297388	0.297138	0.324399	High
High	[R].MNITVK.[N]	1xHexNAc(5)Hex(6)Fuc(1)NeuAc(2) [N2]	3	P26006	P26006 [106-111]	0	3421.36	HexNAc(5)Hex(6)Fuc(1)NeuAc(2)	0	106	4.93	241	14	1.16568e-05	1.21065e-06	0	0	0.0395624	0.0089928	0.00891265	0.00998004	High
High	[R].MNSSPAGTPSPQPSR.[A]	1xOxidation [M1]; 1xHexNAc(3)Hex(4)NeuAc(1) [N2]	1	Q9HBY8	Q9HBY8 [61-75]	0	3078.25	HexNAc(3)Hex(4)NeuAc(1)	0	61	2.04	131.9	57.4	0.00904699	0.00407056	0.00379267	0.00466563	0.0150754	0.00677201	0.00594059	0.00666667	High
High	[R].MSVINFECNK.[T]	1xCarbamidomethyl [C8]; 1xHexNAc(6)Hex(7)Fuc(1)NeuAc(2) [N9]	1	P11717	P11717 [427-436]	0	4322.66	HexNAc(6)Hex(7)Fuc(1)NeuAc(2)	1	427	2.86	94.3	1.3	0.00137652	0.00294551	0.00289855	0.00350263	0.825082	0.136574	0.136101	0.151476	High
High	[R].MSVINFECNK.[T]	1xCarbamidomethyl [C8]; 1xHexNAc(6)Hex(7)Fuc(1)NeuAc(1) [N9]	1	P11717	P11717 [427-436]	0	4031.56	HexNAc(6)Hex(7)Fuc(1)NeuAc(1)	0	427	3.73	178.8	13.6	0.000187159	1.31083e-05	0	0	0.396078	0.054834	0.0542083	0.0611916	High
High	[R].MSVINFECNK.[T]	1xCarbamidomethyl [C8]; 1xHexNAc(6)Hex(7)Fuc(1)NeuAc(3) [N9]	1	P11717	P11717 [427-436]	0	4613.76	HexNAc(6)Hex(7)Fuc(1)NeuAc(3)	0	427	5.02	125.5	48.5	9.57284e-06	9.0677e-07	0	0	0.0327224	0.00677201	0.00555555	0.00622407	High
High	[R].MSVINFECNK.[T]	1xCarbamidomethyl [C8]; 1xHexNAc(5)Hex(6)Fuc(1)NeuAc(3) [N9]	1	P11717	P11717 [427-436]	0	4248.62	HexNAc(5)Hex(6)Fuc(1)NeuAc(3)	0	427	5.75	257.6	52.2	1.77224e-06	1.8062e-07	0	0	0.00622388	0.00478469	0.00464037	0.00516796	High
High	[R].MSVINFECNK.[T]	1xCarbamidomethyl [C8]; 1xHexNAc(4)Hex(5)Fuc(1)NeuAc(1) [N9]; 1xOxidation [M1]	1	P11717	P11717 [427-436]	0	3317.3	HexNAc(4)Hex(5)Fuc(1)NeuAc(1)	0	427	7.35	269.3	117.4	4.4418e-08	1.37044e-08	0	0	0.000156943	4.83241e-05	0	0	High
High	[R].MSVINFECNK.[T]	1xCarbamidomethyl [C8]; 1xHexNAc(4)Hex(5)Fuc(1)NeuAc(2) [N9]	1	P11717	P11717 [427-436]	0	3592.4	HexNAc(4)Hex(5)Fuc(1)NeuAc(2)	0	427	7.35	329.7	109.1	4.43813e-08	1.34396e-08	0	0	0.000156813	4.73796e-05	0	0	High
High	[R].MSVINFECNK.[T]	1xCarbamidomethyl [C8]; 1xHexNAc(5)Hex(6)Fuc(1)NeuAc(1) [N9]	1	P11717	P11717 [427-436]	0	3666.43	HexNAc(5)Hex(6)Fuc(1)NeuAc(1)	0	427	7.4	370	137.2	3.98102e-08	1.21013e-08	0	0	0.000140664	4.2603e-05	0	0	High
High	[R].MSVINFECNK.[T]	1xCarbamidomethyl [C8]; 1xHexNAc(5)Hex(6)Fuc(1)NeuAc(2) [N9]	1	P11717	P11717 [427-436]	0	3957.53	HexNAc(5)Hex(6)Fuc(1)NeuAc(2)	0	427	7.41	345.8	110.6	3.89694e-08	1.18521e-08	0	0	0.000137694	4.1713e-05	0	0	High
High	[R].NATLVNEADK.[L]	1xHexNAc(5)Hex(6)Fuc(1)NeuAc(2) [N1]	1	P15144	P15144 [818-827]	0	3790.51	HexNAc(5)Hex(6)Fuc(1)NeuAc(2)	0	818	3.82	202	26.7	0.000150023	9.26727e-06	0	0	0.344687	0.0409712	0.0404192	0.0456853	High
High	[R].NATLVNEADK.[L]	1xHexNAc(7)Hex(8)Fuc(1)NeuAc(3) [N1]	1	P15144	P15144 [818-827]	0	4811.86	HexNAc(7)Hex(8)Fuc(1)NeuAc(3)	1	818	4.2	94.2	8.5	6.24794e-05	3.91898e-06	0	0	0.195213	0.0382883	0.0381166	0.0418719	High
High	[R].NATLVNEADK.[L]	1xHexNAc(5)Hex(6)NeuAc(1) [N1]	1	P15144	P15144 [818-827]	0	3353.35	HexNAc(5)Hex(6)NeuAc(1)	0	818	4.75	177.3	45.8	1.77779e-05	1.54956e-06	0	0	0.0647935	0.0233161	0.0229008	0.0251397	High
High	[R].NATR.[Y]	1xHexNAc(5)Hex(6)Fuc(1)NeuAc(2) [N1]	1	P11279	P11279 [107-110]	0	3177.21	HexNAc(5)Hex(6)Fuc(1)NeuAc(2)	0	107	1.91	222.7	11.8	0.0121619	0.00892857	0.00888099	0.010142	0.978806	0.455194	0.453828	0.477861	High
High	[R].NATR.[Y]	1xHexNAc(5)Hex(6)NeuAc(2) [N1]	1	P11279	P11279 [107-110]	0	3031.15	HexNAc(5)Hex(6)NeuAc(2)	0	107	1.96	139.7	9.8	0.0108838	0.00407056	0.00373134	0.00459418	0.972732	0.380921	0.378343	0.40409	High
High	[R].NATR.[Y]	1xHexNAc(6)Hex(7)NeuAc(1) [N1]	1	P11279	P11279 [107-110]	0	3105.19	HexNAc(6)Hex(7)NeuAc(1)	0	107	2.02	97.6	11.4	0.00960056	0.00407056	0.00377358	0.00464396	0.96941	0.37619	0.375935	0.403392	High
High	[R].NCSAAPQPEPAAGLASYPELR.[L]	1xCarbamidomethyl [C2]; 1xHexNAc(2)Hex(9) [N1]	1	O75718	O75718 [87-107]	0	4063.68	HexNAc(2)Hex(9)	1	87	2.3	125.7	91.5	0.00503529	0.00204499	0.00185874	0.00211864	0.0167741	0.00321543	0.00308642	0.00337838	High
High	[R].NDTK.[E]	1xHexNAc(11)Hex(11)NeuAc(1) [N1]	1	P67809	P67809 [78-81]	0	4784.78	HexNAc(11)Hex(11)NeuAc(1)	1	78	1.91	75.2	1.8	0.0123977	0.00407056	0.00371287	0.00456621	0.975788	0.387117	0.38632	0.411885	High
High	[R].NLSISTK.[N]	1xHexNAc(5)Hex(6) [N1]	1	A8K979	A8K979 [674-680]	0	2750.15	HexNAc(5)Hex(6)	0	674	1.7	234.6	24	0.0197262	0.00407056	0.00365854	0.00452489	0.0328705	0.00736648	0.00732601	0.00819672	High
High	[R].NLSISTK.[N]	1xHexNAc(7)Hex(8)NeuAc(1) [N1]	1	A8K979	A8K979 [674-680]	0	3771.51	HexNAc(7)Hex(8)NeuAc(1)	0	674	1.79	245.8	27.4	0.0162996	0.00892857	0.00880282	0.0100402	0.0407327	0.0164835	0.0163488	0.0179641	High
High	[R].NLSISTK.[N]	1xHexNAc(5)Hex(6)NeuAc(1) [N1]	1	A8K979	A8K979 [674-680]	0	3041.24	HexNAc(5)Hex(6)NeuAc(1)	0	674	1.86	285.8	15.4	0.0139497	0.00407056	0.0036855	0.00454545	0.023245	0.00677201	0.00573614	0.00641026	High
High	[R].NNSNNFDLNR.[N]	1xHexNAc(4)Hex(5)NeuAc(2) [N1]	1	O75976	O75976 [626-635]	0	3412.32	HexNAc(4)Hex(5)NeuAc(2)	0	626	3.19	204.3	22.1	0.000648362	0.00149031	0.0014881	0.00179533	0.692771	0.118644	0.118501	0.132432	High
High	[R].NNSNNFDLNR.[N]	1xHexNAc(3)Hex(6)NeuAc(1) [N1]	1	O75976	O75976 [626-635]	0	3080.2	HexNAc(3)Hex(6)NeuAc(1)	0	626	6.5	282.2	33.6	3.13213e-07	5.1356e-08	0	0	0.00110563	0.000179885	0	0	High
High	[R].NPCTSEQNCTSPFSYK.[N]	2xCarbamidomethyl [C3; C9]; 1xHexNAc(8)Hex(9)Fuc(1)NeuAc(3) [N8]	1	P05556	P05556 [205-220]	0	6022.24	HexNAc(8)Hex(9)Fuc(1)NeuAc(3)	1	205	2.21	34.1	13.1	0.00619373	0.00407056	0.00390117	0.00478469	0.95328	0.323367	0.322153	0.350683	High
High	[R].NPCTSEQNCTSPFSYK.[N]	1xDeamidated [Q7]; 2xCarbamidomethyl [C3; C9]; 1xHexNAc(7)Hex(8)Fuc(1)NeuAc(1) [N8]	1	P05556	P05556 [205-220]	0	5075.91	HexNAc(7)Hex(8)Fuc(1)NeuAc(1)	1	205	2.56	52.5	15.1	0.00277257	0.00204499	0.00200803	0.00228833	0.913464	0.284504	0.283816	0.303502	High
High	[R].NPCTSEQNCTSPFSYK.[N]	2xCarbamidomethyl [C3; C9]; 1xHexNAc(6)Hex(7)Fuc(1)NeuAc(3) [N8]	1	P05556	P05556 [205-220]	0	5291.98	HexNAc(6)Hex(7)Fuc(1)NeuAc(3)	0	205	4.6	228.1	178	2.52514e-05	2.42571e-06	0	0	0.0894486	0.0316302	0.0315534	0.0347593	High
High	[R].NPCTSEQNCTSPFSYK.[N]	2xCarbamidomethyl [C3; C9]; 1xHexNAc(5)Hex(6)NeuAc(3) [N8]	1	P05556	P05556 [205-220]	0	4780.79	HexNAc(5)Hex(6)NeuAc(3)	0	205	4.84	170.7	80	1.43923e-05	1.25657e-06	0	0	0.0483423	0.0089928	0.00888099	0.00994036	High
High	[R].NPCTSEQNCTSPFSYK.[N]	2xCarbamidomethyl [C3; C9]; 1xHexNAc(7)Hex(8)Fuc(1)NeuAc(2) [N8]	1	P05556	P05556 [205-220]	0	5366.02	HexNAc(7)Hex(8)Fuc(1)NeuAc(2)	1	205	5.48	157.5	109.9	3.32738e-06	2.93244e-07	0	0	0.0128066	0.00321543	0.00314465	0.00343642	High
High	[R].NPCTSEQNCTSPFSYK.[N]	2xCarbamidomethyl [C3; C9]; 1xHexNAc(7)Hex(8)Fuc(1)NeuAc(3) [N8]	1	P05556	P05556 [205-220]	0	5657.11	HexNAc(7)Hex(8)Fuc(1)NeuAc(3)	1	205	6.06	170.7	112.8	8.73173e-07	1.01534e-07	0	0	0.00307619	0.000348727	0	0	High
High	[R].NPCTSEQNCTSPFSYK.[N]	2xCarbamidomethyl [C3; C9]; 1xHexNAc(4)Hex(5)NeuAc(1) [N8]	1	P05556	P05556 [205-220]	0	3833.47	HexNAc(4)Hex(5)NeuAc(1)	0	205	6.92	236.2	120	1.20334e-07	3.74027e-08	0	0	0.000468868	0.000148007	0	0	High
High	[R].NPCTSEQNCTSPFSYK.[N]	2xCarbamidomethyl [C3; C9]; 1xHexNAc(5)Hex(5)Fuc(1)NeuAc(1) [N8]	1	P05556	P05556 [205-220]	0	4182.6	HexNAc(5)Hex(5)Fuc(1)NeuAc(1)	-1	205	7.25	480.4	360.8	5.57028e-08	1.80484e-08	0	0	0.000196808	6.38007e-05	0	0	High
High	[R].NPCTSEQNCTSPFSYK.[N]	1xHexNAc(5)Hex(6)Fuc(1)NeuAc(2) [N8]; 2xCarbamidomethyl [C3; C9]	1	P05556	P05556 [205-220]	0	4635.75	HexNAc(5)Hex(6)Fuc(1)NeuAc(2)	0	205	7.4	304.5	144.3	4.00906e-08	1.61114e-08	0	0	0.000156257	6.4205e-05	0	0	High
High	[R].NPCTSEQNCTSPFSYK.[N]	2xCarbamidomethyl [C3; C9]; 1xHexNAc(4)Hex(5)Fuc(1)NeuAc(2) [N8]	1	P05556	P05556 [205-220]	0	4270.62	HexNAc(4)Hex(5)Fuc(1)NeuAc(2)	0	205	7.69	238.2	144.6	2.05052e-08	5.51388e-09	0	0	7.24574e-05	1.95897e-05	0	0	High
High	[R].NPCTSEQNCTSPFSYK.[N]	2xCarbamidomethyl [C3; C9]; 1xHexNAc(5)Hex(6)Fuc(1)NeuAc(1) [N8]	1	P05556	P05556 [205-220]	0	4344.66	HexNAc(5)Hex(6)Fuc(1)NeuAc(1)	0	205	7.94	415.8	285.3	1.14809e-08	3.12914e-09	0	0	4.05704e-05	1.11238e-05	0	0	High
High	[R].NPCTSEQNCTSPFSYK.[N]	2xCarbamidomethyl [C3; C9]; 1xHexNAc(6)Hex(7)Fuc(1)NeuAc(2) [N8]	1	P05556	P05556 [205-220]	0	5000.88	HexNAc(6)Hex(7)Fuc(1)NeuAc(2)	0	205	8.18	430.4	316.2	6.67408e-09	1.8431e-09	0	0	2.35848e-05	6.55154e-06	0	0	High
High	[R].NPCTSEQNCTSPFSYK.[N]	2xCarbamidomethyl [C3; C9]; 1xHexNAc(5)Hex(6)Fuc(1)NeuAc(3) [N8]	1	P05556	P05556 [205-220]	0	4926.85	HexNAc(5)Hex(6)Fuc(1)NeuAc(3)	0	205	8.31	478.8	361.4	4.87857e-09	9.18914e-10	0	0	1.90173e-05	3.46729e-06	0	0	High
High	[R].NPCTSEQNCTSPFSYK.[N]	2xCarbamidomethyl [C3; C9]; 1xHexNAc(6)Hex(7)Fuc(1)NeuAc(1) [N8]	1	P05556	P05556 [205-220]	0	4709.79	HexNAc(6)Hex(7)Fuc(1)NeuAc(1)	0	205	8.71	495.6	356.9	1.95619e-09	4.38349e-10	0	0	6.91286e-06	1.53804e-06	0	0	High
High	[R].NPCTSEQNCTSPFSYK.[N]	2xCarbamidomethyl [C3; C9]; 1xHexNAc(4)Hex(5)Fuc(1)NeuAc(1) [N8]	2	P05556	P05556 [205-220]	0	3979.52	HexNAc(4)Hex(5)Fuc(1)NeuAc(1)	0	205	10.01	597.6	419.6	9.83503e-11	8.47847e-12	0	0	3.47557e-07	2.99618e-08	0	0	High
High	[R].NPCTSEQNCTSPFSYK.[N]	2xCarbamidomethyl [C3; C9]; 1xHexNAc(2)Hex(7) [N8]	1	P05556	P05556 [205-220]	0	3460.32	HexNAc(2)Hex(7)	0	205	11.01	602.3	470.7	9.83503e-12	1.47023e-12	0	0	3.47557e-08	5.19561e-09	0	0	High
High	[R].NPCTSEQNCTSPFSYK.[N]	2xCarbamidomethyl [C3; C9]; 1xHexNAc(2)Hex(9) [N8]	1	P05556	P05556 [205-220]	0	3784.42	HexNAc(2)Hex(9)	0	205	11.01	647.3	461.8	9.83503e-12	1.17149e-12	0	0	3.47557e-08	4.1399e-09	0	0	High
High	[R].NPCTSEQNCTSPFSYK.[N]	2xCarbamidomethyl [C3; C9]; 1xHexNAc(2)Hex(8) [N8]	1	P05556	P05556 [205-220]	0	3622.37	HexNAc(2)Hex(8)	0	205	12.01	672.4	487.1	9.83503e-13	1.63589e-13	0	0	3.47557e-09	5.78101e-10	0	0	High
High	[R].NTTEVVNTMCGYK.[T]	1xCarbamidomethyl [C10]; 1xHexNAc(4)Hex(5)Fuc(1)NeuAc(2) [N1]; 1xOxidation [M9]	1	O95858	O95858 [189-201]	0	3883.5	HexNAc(4)Hex(5)Fuc(1)NeuAc(2)	0	189	1.2	214.5	56.2	0.0637279	0.00937866	0.00935672	0.0115607	0.0796538	0.0140105	0.013913	0.0155642	High
High	[R].NTTIFLK.[F]	1xHexNAc(4)Hex(5)NeuAc(2) [N1]	1	Q8NBN3	Q8NBN3 [62-68]	0	3041.26	HexNAc(4)Hex(5)NeuAc(2)	0	62	2.93	229.8	38.8	0.00117016	0.00294551	0.00293686	0.0035524	0.00584414	0.00478469	0.00469483	0.0052356	High
High	[R].NTTIPTK.[K]	1xHexNAc(4)Hex(5)NeuAc(1) [N1]	1	P38646	P38646 [461-467]	0	2688.11	HexNAc(4)Hex(5)NeuAc(1)	0	461	2.06	236.3	18.1	0.00864944	0.00727273	0.00720721	0.00821355	0.0216151	0.006006	0.00593472	0.0064935	High
High	[R].NTTIPTK.[Q]	1xHexNAc(5)Hex(6) [N1]	1	P11142	P11142 [417-423]	0	2762.15	HexNAc(5)Hex(6)	0	417	1.96	98.3	15.3	0.0108838	0.00407056	0.00372671	0.00458716	0.972732	0.380921	0.380519	0.406316	High
High	[R].NTTIPTK.[Q]	1xHexNAc(5)Hex(6)NeuAc(1) [N1]	1	P11142	P11142 [417-423]	0	3053.24	HexNAc(5)Hex(6)NeuAc(1)	0	417	2.47	224.7	3.7	0.00342293	0.00294551	0.00272851	0.00333333	0.91962	0.254902	0.252757	0.277609	High
High	[R].NTTIPTK.[Q]	1xHexNAc(6)Hex(7)NeuAc(1) [N1]	1	P11142	P11142 [417-423]	0	3418.38	HexNAc(6)Hex(7)NeuAc(1)	0	417	2.47	214.8	19.1	0.00342293	0.00294551	0.0027248	0.00332779	0.91962	0.254902	0.252525	0.277328	High
High	[R].NVSGFSIANR.[S]	1xHexNAc(5)Hex(3) [N9]; 1xHexNAc(4)Hex(5)NeuAc(1) [N1]	1	Q9H5V8	Q9H5V8 [205-214]	0	4479.78	HexNAc(4)Hex(5)NeuAc(1); HexNAc(5)Hex(3)	1	205	1.96	47.8	16.4	0.0108527	0.00892857	0.0088968	0.0101626	0.976345	0.447917	0.446486	0.470389	High
High	[R].NVSGFSIANR.[S]	1xHexNAc(3)Hex(6)NeuAc(1) [N1]; 1xHexNAc(3)Hex(6) [N9]	1	Q9H5V8	Q9H5V8 [205-214]	0	4518.75	HexNAc(3)Hex(6)NeuAc(1); HexNAc(3)Hex(6)	1	205	2.47	65.2	1.5	0.00338697	0.00204499	0.00191571	0.00218341	0.928403	0.358074	0.357715	0.380086	High
High	[R].NVSGFSIANR.[S]	1xHexNAc(3)Hex(5)NeuAc(1) [N9]; 1xHexNAc(4)Hex(4)NeuAc(1) [N1]	1	Q9H5V8	Q9H5V8 [205-214]	0	4526.77	HexNAc(4)Hex(4)NeuAc(1); HexNAc(3)Hex(5)NeuAc(1)	1	205	2.69	59.8	1.3	0.00205648	0.00294551	0.00283688	0.0034188	0.874529	0.187633	0.187433	0.207547	High
High	[R].NVSGFSIANR.[S]	1xHexNAc(4)Hex(6)NeuAc(1) [N1]; 1xHexNAc(3)Hex(5)Fuc(1) [N9]	1	Q9H5V8	Q9H5V8 [205-214]	0	4705.84	HexNAc(4)Hex(6)NeuAc(1); HexNAc(3)Hex(5)Fuc(1)	1	205	2.69	29.7	7	0.00205648	0.00294551	0.00282486	0.00340136	0.874529	0.190727	0.190526	0.21071	High
High	[R].NVSGFSIANR.[S]	1xHexNAc(3)Hex(4)Fuc(1)NeuAc(1) [N1]; 1xHexNAc(9)Hex(6)Fuc(1) [N9]	1	Q9H5V8	Q9H5V8 [205-214]	0	5705.24	HexNAc(3)Hex(4)Fuc(1)NeuAc(1); HexNAc(9)Hex(6)Fuc(1)	0	205	2.95	4.5	4.5	0.00112058	6.61441e-05	0	0	0.811158	0.192857	0.192582	0.20743	High
High	[R].NVTR.[L]	1xHexNAc(2)Hex(8) [N1]	1	P05556	P05556 [269-272]	0	2191.86	HexNAc(2)Hex(8)	0	269	1.36	125.1	4.3	0.0433225	0.0083632	0.00834326	0.0103093	0.991859	0.430207	0.429034	0.452972	High
High	[R].NVTR.[L]	1xHexNAc(7)Hex(6)Fuc(1)NeuAc(4) [N1]	1	P05556	P05556 [269-272]	0	4193.59	HexNAc(7)Hex(6)Fuc(1)NeuAc(4)	0	269	1.91	39.3	3.4	0.0122958	0.00407056	0.00372208	0.00458015	0.975605	0.382637	0.381166	0.406639	High
High	[R].QQMENYPKNNHTASILDR.[M]	1xDeamidated [Q1]; 1xHexNAc(7)Hex(8)Fuc(1)NeuAc(1) [N10]	1	P08962	P08962 [121-138]	1	5315.15	HexNAc(7)Hex(8)Fuc(1)NeuAc(1)	1	121	2.29	197.8	71	0.00507082	0.00407056	0.00395257	0.00483871	0.943466	0.312602	0.312347	0.340197	High
High	[R].RDHHGANFSCR.[T]	1xCarbamidomethyl [C10]; 1xHexNAc(6)Hex(7)Fuc(1)NeuAc(2) [N7]	1	P05362	P05362 [177-187]	1	4437.69	HexNAc(6)Hex(7)Fuc(1)NeuAc(2)	1	177	4.15	219.6	124.2	7.13664e-05	4.16108e-06	0	0	0.200402	0.0288461	0.028754	0.0322581	High
High	[R].RMPYESETNQSELK.[H]	1xHexNAc(4)Hex(5)Fuc(1)NeuAc(2) [N9]	1	Q9NRM1	Q9NRM1 [526-539]	1	4062.63	HexNAc(4)Hex(5)Fuc(1)NeuAc(2)	0	526	2.14	239.5	4.5	0.00727914	0.00407056	0.00384123	0.00472441	0.0121296	0.00677201	0.00626305	0.00697674	High
High	[R].SANASFNIK.[W]	1xHexNAc(4)Hex(5)Fuc(1)NeuAc(2) [N3]	1	Q13308	Q13308 [114-122]	0	3302.32	HexNAc(4)Hex(5)Fuc(1)NeuAc(2)	0	114	2.8	241.8	42.2	0.00156881	0.00294551	0.00285307	0.00344234	0.00783511	0.00677201	0.00671141	0.00746268	High
High	[R].SDAPDSTGDQPGLHQDNSSNGK.[S]	1xHexNAc(2)Hex(4) [N17]	1	O15164	O15164 [780-801]	0	3281.32	HexNAc(2)Hex(4)	0	780	1.25	165.9	33.9	0.0561145	0.0083632	0.00822562	0.0101744	0.0701378	0.0124334	0.0122807	0.0137525	High
High	[R].SMSNTTEGVWEGTR.[S]	1xHexNAc(2)Hex(9) [N4]	1	Q8WWV6	Q8WWV6 [273-286]	0	3419.32	HexNAc(2)Hex(9)	0	273	1.59	141.9	32.9	0.0258561	0.00892857	0.0085034	0.00970874	0.032318	0.006006	0.00561798	0.00617284	High
High	[R].TASCSNVTCWLK.[D]	2xCarbamidomethyl [C4; C9]; 1xHexNAc(4)Hex(5)Fuc(1)NeuAc(1) [N6]	1	P17301	P17301 [1052-1063]	0	3486.38	HexNAc(4)Hex(5)Fuc(1)NeuAc(1)	0	1052	6.26	236.9	48.9	5.5385e-07	6.80598e-08	0	0	0.00195341	0.000227815	0	0	High
High	[R].TASVSINQTEPPK.[V]	1xHexNAc(5)Hex(6)Fuc(1)NeuAc(2) [N7]	1	P29317	P29317 [429-441]	0	4087.67	HexNAc(5)Hex(6)Fuc(1)NeuAc(2)	0	429	2.36	192.1	60.3	0.00438191	0.00407056	0.00405954	0.00496689	0.0218842	0.00677201	0.00576923	0.00645161	High
High	[R].TASVSINQTEPPK.[V]	1xHexNAc(5)Hex(6)Fuc(1)NeuAc(3) [N7]	1	P29317	P29317 [429-441]	0	4378.77	HexNAc(5)Hex(6)Fuc(1)NeuAc(3)	0	429	2.75	325.1	48.7	0.00177914	0.00294551	0.00284495	0.00343053	0.00888554	0.00677201	0.00659341	0.00733496	High
High	[R].TASVSINQTEPPK.[V]	1xHexNAc(4)Hex(5)Fuc(1)NeuAc(2) [N7]	1	P29317	P29317 [429-441]	0	3722.54	HexNAc(4)Hex(5)Fuc(1)NeuAc(2)	0	429	6.59	233.2	59.1	2.58366e-07	6.37709e-08	0	0	0.00100616	0.000251611	0	0	High
High	[R].TCSSNLTLTSGSK.[H]	1xCarbamidomethyl [C2]; 1xHexNAc(5)Hex(6)Fuc(1) [N5]	1	Q9H5V8	Q9H5V8 [382-394]	0	3489.42	HexNAc(5)Hex(6)Fuc(1)	0	382	5.41	247.1	27	3.86233e-06	4.37769e-07	0	0	0.0134652	0.00677201	0.00612245	0.00683371	High
High	[R].TCSSNLTLTSGSK.[H]	1xCarbamidomethyl [C2]; 1xHexNAc(4)Hex(5)Fuc(1) [N5]	1	Q9H5V8	Q9H5V8 [382-394]	0	3124.29	HexNAc(4)Hex(5)Fuc(1)	0	382	6.86	266.7	69.2	1.37875e-07	4.2101e-08	0	0	0.000537179	0.000166475	0	0	High
High	[R].TCSSNLTLTSGSK.[H]	1xCarbamidomethyl [C2]; 1xHexNAc(4)Hex(5)Fuc(1)NeuAc(1) [N5]	1	Q9H5V8	Q9H5V8 [382-394]	0	3415.38	HexNAc(4)Hex(5)Fuc(1)NeuAc(1)	0	382	7.25	458.6	145.4	5.56182e-08	2.07668e-08	0	0	0.000216764	8.25105e-05	0	0	High
High	[R].TDCDSSTTSLCSFPVANVSLTK.[G]	2xCarbamidomethyl [C3; C11]; 1xHexNAc(2)Hex(9) [N17]	1	Q96G97	Q96G97 [72-93]	0	4254.72	HexNAc(2)Hex(9)	0	72	2.09	84.9	30	0.00821405	0.00407056	0.00381194	0.00469483	0.0136875	0.00677201	0.00609756	0.00680272	High
High	[R].THANGSIK.[R]	1xHexNAc(7)Hex(8)Fuc(1)NeuAc(2) [N4]	1	Q07954	Q07954 [2114-2121]	0	4273.66	HexNAc(7)Hex(8)Fuc(1)NeuAc(2)	0	2114	2.66	33.7	8.8	0.00216652	0.00294551	0.00280112	0.00338409	0.880273	0.228315	0.227861	0.250274	High
High	[R].THNLTDLSPHLR.[Y]	1xHexNAc(5)Hex(6)Fuc(1)NeuAc(2) [N3]	1	P32004	P32004 [977-988]	0	4119.7	HexNAc(5)Hex(6)Fuc(1)NeuAc(2)	1	977	2.19	124.4	6	0.00640086	0.00407056	0.00388098	0.0047619	0.95473	0.327894	0.325869	0.35473	High
High	[R].TNSTFVQALVEHVK.[E]	1xHexNAc(5)Hex(6)Fuc(1)NeuAc(2) [N2]	1	P07602	P07602 [214-227]	0	4288.8	HexNAc(5)Hex(6)Fuc(1)NeuAc(2)	0	214	3.51	87.3	4.2	0.000306862	1.88927e-05	0	0	0.517496	0.0793011	0.0787717	0.0888554	High
High	[R].TNSTFVQALVEHVK.[E]	1xHexNAc(5)Hex(6)Fuc(1)NeuAc(3) [N2]	1	P07602	P07602 [214-227]	0	4579.9	HexNAc(5)Hex(6)Fuc(1)NeuAc(3)	0	214	3.99	224.8	1.6	0.000102566	7.92849e-06	0	0	0.284726	0.0608519	0.0607287	0.0644444	High
High	[R].TNSTFVQALVEHVK.[E]	1xHexNAc(7)Hex(8)NeuAc(1) [N2]	1	P07602	P07602 [214-227]	0	4581.91	HexNAc(7)Hex(8)NeuAc(1)	0	214	6.5	274.4	151.8	3.13128e-07	5.06424e-08	0	0	0.00110533	0.000177341	0	0	High
High	[R].TSIPTINMENK.[T]	1xOxidation [M8]; 1xHexNAc(5)Hex(6)Fuc(1) [N10]	1	P26006	P26006 [960-970]	0	3397.4	HexNAc(5)Hex(6)Fuc(1)	0	960	3.71	157.7	42.3	0.00019685	1.42241e-05	0	0	0.408157	0.0578279	0.0577465	0.0651828	High
High	[R].TSIPTINMENK.[T]	1xHexNAc(2)Hex(9) [N10]; 1xOxidation [M8]	1	P26006	P26006 [960-970]	0	3128.26	HexNAc(2)Hex(9)	0	960	4.61	181.2	33.3	2.45756e-05	1.63611e-06	0	0	0.0796538	0.0140105	0.0138889	0.015534	High
High	[R].TSIPTINMENK.[T]	1xHexNAc(2)Hex(7) [N10]	1	P26006	P26006 [960-970]	0	2788.16	HexNAc(2)Hex(7)	0	960	4.63	117.4	71.9	2.34516e-05	1.59471e-06	0	0	0.0762998	0.0140105	0.0139373	0.0155945	High
High	[R].TSIPTINMENK.[T]	1xHexNAc(5)Hex(6)NeuAc(2) [N10]; 1xOxidation [M8]	1	P26006	P26006 [960-970]	0	3833.53	HexNAc(5)Hex(6)NeuAc(2)	0	960	6.26	228.9	43.9	5.5385e-07	6.55164e-08	0	0	0.00195341	0.000218636	0	0	High
High	[R].TSIPTINMENK.[T]	1xOxidation [M8]; 1xHexNAc(5)Hex(6)NeuAc(1) [N10]	1	P26006	P26006 [960-970]	0	3542.43	HexNAc(5)Hex(6)NeuAc(1)	0	960	6.77	283.6	73.2	1.71407e-07	3.57394e-08	0	0	0.000605364	0.000126656	0	0	High
High	[R].TSIPTINMENK.[T]	1xHexNAc(4)Hex(5)NeuAc(1) [N10]	1	P26006	P26006 [960-970]	0	3161.31	HexNAc(4)Hex(5)NeuAc(1)	0	960	6.95	257	99.9	1.11878e-07	2.80327e-08	0	0	0.000395208	9.92926e-05	0	0	High
High	[R].TSIPTINMENK.[T]	1xHexNAc(5)Hex(6)Fuc(1)NeuAc(1) [N10]	1	P26006	P26006 [960-970]	0	3672.5	HexNAc(5)Hex(6)Fuc(1)NeuAc(1)	0	960	7.36	446.3	146.4	4.39761e-08	1.33056e-08	0	0	0.000155382	4.69017e-05	0	0	High
High	[R].TVLENSTSYEEAK.[N]	1xHexNAc(2)Hex(7) [N5]	1	Q13510	Q13510 [255-267]	0	3011.22	HexNAc(2)Hex(7)	0	255	7.3	384.5	243.8	5.00383e-08	1.5361e-08	0	0	0.000176798	5.42302e-05	0	0	High
High	[R].TVLENSTSYEEAK.[N]	1xHexNAc(2)Hex(8) [N5]	1	Q13510	Q13510 [255-267]	0	3173.28	HexNAc(2)Hex(8)	0	255	7.45	563.8	364.8	3.52687e-08	9.90653e-09	0	0	0.00012462	3.47575e-05	0	0	High
High	[R].VEDAYILTCNVSLEYEK.[T]	1xCarbamidomethyl [C9]; 1xHexNAc(4)Hex(4)NeuAc(1) [N10]	1	P40227	P40227 [225-241]	0	3797.6	HexNAc(4)Hex(4)NeuAc(1)	0	225	1.22	88.9	31.9	0.0606327	0.00937866	0.00936768	0.0115774	0.0757851	0.0140105	0.0139616	0.015625	High
High	[R].VFGSQNLTTVK.[L]	1xHexNAc(2)Hex(8) [N6]	1	Q9Y4L1	Q9Y4L1 [510-520]	0	2896.23	HexNAc(2)Hex(8)	0	510	4.61	213.3	32.5	2.45756e-05	1.71848e-06	0	0	0.0796538	0.015625	0.015544	0.0173745	High
High	[R].VFGSQNLTTVK.[L]	1xHexNAc(2)Hex(9) [N6]	1	Q9Y4L1	Q9Y4L1 [510-520]	0	3058.29	HexNAc(2)Hex(9)	0	510	7.32	423.5	172.6	4.83933e-08	1.46572e-08	0	0	0.000170986	5.17219e-05	0	0	High
High	[R].VQPFNVTQGK.[Y]	1xHexNAc(6)Hex(7)NeuAc(4) [N5]	1	P13473	P13473 [352-361]	0	4634.83	HexNAc(6)Hex(7)NeuAc(4)	-1	352	1.4	77.1	3.3	0.0398403	0.00600961	0.00597371	0.00737463	0.991219	0.423986	0.423588	0.44754	High
High	[R].VQPFNVTQGK.[Y]	1xHexNAc(5)Hex(6)Fuc(1)NeuAc(2) [N5]	1	P13473	P13473 [352-361]	0	3833.56	HexNAc(5)Hex(6)Fuc(1)NeuAc(2)	0	352	2.84	98.9	26.4	0.00144164	0.00294551	0.00286944	0.0034662	0.831538	0.16	0.159645	0.177122	High
High	[R].VQPFNVTQGK.[Y]	1xHexNAc(5)Hex(6)NeuAc(2) [N5]	1	P13473	P13473 [352-361]	0	3687.5	HexNAc(5)Hex(6)NeuAc(2)	0	352	2.84	141.7	29.7	0.00144164	0.00294551	0.00286533	0.00346021	0.831538	0.162791	0.162611	0.180368	High
High	[R].VQPFNVTQGK.[Y]	1xHexNAc(5)Hex(6)NeuAc(1) [N5]	1	P13473	P13473 [352-361]	0	3396.41	HexNAc(5)Hex(6)NeuAc(1)	0	352	2.96	157.2	17.6	0.00110813	5.94115e-05	0	0	0.809365	0.179971	0.17971	0.193701	High
High	[R].VQPFNVTQGK.[Y]	1xHexNAc(2)Hex(10) [N5]	1	P13473	P13473 [352-361]	0	3144.29	HexNAc(2)Hex(10)	0	352	3.1	78	1.8	0.000793906	4.61204e-05	0	0	0.752697	0.1518	0.149461	0.161345	High
High	[R].VQPFNVTQGK.[Y]	1xHexNAc(4)Hex(5) [N5]	1	P13473	P13473 [352-361]	0	2740.18	HexNAc(4)Hex(5)	0	352	3.19	147.2	11.5	0.000648362	0.00149031	0.00148588	0.00179211	0.692771	0.11971	0.119421	0.133423	High
High	[R].VQPFNVTQGK.[Y]	1xHexNAc(2)Hex(6) [N5]	1	P13473	P13473 [352-361]	0	2496.08	HexNAc(2)Hex(6)	0	352	5	149	80.3	1.00004e-05	1.00572e-06	0	0	0.0341342	0.00736648	0.00731261	0.00817996	High
High	[R].VQPFNVTQGK.[Y]	1xHexNAc(5)Hex(6)Fuc(1) [N5]	1	P13473	P13473 [352-361]	0	3251.37	HexNAc(5)Hex(6)Fuc(1)	0	352	5.02	206.4	58.1	9.59131e-06	9.2328e-07	0	0	0.0327835	0.00677201	0.00554529	0.00621118	High
High	[R].VQPFNVTQGK.[Y]	1xHexNAc(5)Hex(6) [N5]	1	P13473	P13473 [352-361]	0	3105.31	HexNAc(5)Hex(6)	0	352	5.51	185.6	68.8	3.10227e-06	3.34995e-07	0	0	0.0108442	0.00677201	0.00635593	0.0070922	High
High	[R].VQPFNVTQGK.[Y]	1xHexNAc(2)Hex(9) [N5]	1	P13473	P13473 [352-361]	0	2982.23	HexNAc(2)Hex(9)	0	352	6.89	229.9	74.1	1.27759e-07	3.06243e-08	0	0	0.00045128	0.000108496	0	0	High
High	[R].VQPFNVTQGK.[Y]	1xHexNAc(3)Hex(4)NeuAc(1) [N5]	1	P13473	P13473 [352-361]	0	2666.14	HexNAc(3)Hex(4)NeuAc(1)	0	352	6.89	237.4	81.2	1.27759e-07	3.09232e-08	0	0	0.00045128	0.000109558	0	0	High
High	[R].VQPFNVTQGK.[Y]	1xHexNAc(4)Hex(5)NeuAc(2) [N5]	1	P13473	P13473 [352-361]	0	3322.37	HexNAc(4)Hex(5)NeuAc(2)	0	352	6.96	422	159.5	1.10552e-07	3.29767e-08	0	0	0.000430769	0.000130598	0	0	High
High	[R].VQPFNVTQGK.[Y]	1xHexNAc(3)Hex(6) [N5]	1	P13473	P13473 [352-361]	0	2699.16	HexNAc(3)Hex(6)	0	352	7.2	262.3	91.5	6.32697e-08	1.96973e-08	0	0	0.000223537	6.96678e-05	0	0	High
High	[R].VQPFNVTQGK.[Y]	1xHexNAc(4)Hex(5)Fuc(1) [N5]	1	P13473	P13473 [352-361]	0	2886.24	HexNAc(4)Hex(5)Fuc(1)	0	352	7.27	279.7	129.5	5.35812e-08	1.73459e-08	0	0	0.000189313	6.13e-05	0	0	High
High	[R].VQPFNVTQGK.[Y]	1xHexNAc(4)Hex(5)Fuc(1)NeuAc(2) [N5]	1	P13473	P13473 [352-361]	0	3468.43	HexNAc(4)Hex(5)Fuc(1)NeuAc(2)	0	352	7.27	327.3	98.1	5.3537e-08	1.7065e-08	0	0	0.000189157	6.03e-05	0	0	High
High	[R].VQPFNVTQGK.[Y]	1xHexNAc(2)Hex(7) [N5]	1	P13473	P13473 [352-361]	0	2658.13	HexNAc(2)Hex(7)	0	352	7.33	299.5	125.3	4.73095e-08	1.43772e-08	0	0	0.000167158	5.07238e-05	0	0	High
High	[R].VQPFNVTQGK.[Y]	1xHexNAc(5)Hex(6)Fuc(1)NeuAc(1) [N5]	1	P13473	P13473 [352-361]	0	3542.47	HexNAc(5)Hex(6)Fuc(1)NeuAc(1)	0	352	7.36	395.6	137.6	4.39658e-08	1.31723e-08	0	0	0.000155345	4.64259e-05	0	0	High
High	[R].VQPFNVTQGK.[Y]	1xHexNAc(4)Hex(5)Fuc(1)NeuAc(1) [N5]	1	P13473	P13473 [352-361]	0	3177.33	HexNAc(4)Hex(5)Fuc(1)NeuAc(1)	0	352	7.45	397.9	150.1	3.57093e-08	1.0157e-08	0	0	0.000126176	3.56535e-05	0	0	High
High	[R].VQPFNVTQGK.[Y]	1xHexNAc(4)Hex(5)NeuAc(1) [N5]	1	P13473	P13473 [352-361]	0	3031.28	HexNAc(4)Hex(5)NeuAc(1)	0	352	7.46	428.1	172.4	3.45079e-08	9.5315e-09	0	0	0.000121932	3.34153e-05	0	0	High
High	[R].VQPFNVTQGK.[Y]	1xHexNAc(2)Hex(8) [N5]	1	P13473	P13473 [352-361]	0	2820.18	HexNAc(2)Hex(8)	0	352	7.49	362.2	146.3	3.23341e-08	8.92266e-09	0	0	0.000114251	3.16791e-05	0	0	High
High	[R].VQPFNVTQGK.[Y]	1xHexNAc(3)Hex(5)NeuAc(1) [N5]	1	P13473	P13473 [352-361]	0	2828.2	HexNAc(3)Hex(5)NeuAc(1)	0	352	7.49	364.7	149.1	3.23341e-08	9.0415e-09	0	0	0.000114251	3.21004e-05	0	0	High
High	[R].VQPFNVTQGK.[Y]	1xHexNAc(3)Hex(6)NeuAc(1) [N5]	1	P13473	P13473 [352-361]	0	2990.25	HexNAc(3)Hex(6)NeuAc(1)	0	352	7.54	416.3	172.4	2.86065e-08	7.52087e-09	0	0	0.000101081	2.67088e-05	0	0	High
High	[R].VTGLNCTTNHPINPK.[G]	1xCarbamidomethyl [C6]; 1xHexNAc(4)Hex(5)Fuc(1)NeuAc(1) [N5]	1	P08648	P08648 [864-878]	0	3725.57	HexNAc(4)Hex(5)Fuc(1)NeuAc(1)	0	864	7.44	258.8	59.9	3.64004e-08	1.10093e-08	0	0	0.000128618	3.87014e-05	0	0	High
High	[R].VTGLNCTTNHPINPK.[G]	1xCarbamidomethyl [C6]; 1xHexNAc(4)Hex(5)Fuc(1)NeuAc(2) [N5]	2	P08648	P08648 [864-878]	0	4016.67	HexNAc(4)Hex(5)Fuc(1)NeuAc(2)	0	864	7.8	397.6	122.1	1.57948e-08	4.2615e-09	0	0	5.58137e-05	1.51451e-05	0	0	High
High	[R].VTPACNTSLPAQR.[W]	1xCarbamidomethyl [C5]; 1xHexNAc(5)Hex(6)Fuc(1)NeuAc(3) [N6]	1	Q9UBG0	Q9UBG0 [64-76]	0	4421.77	HexNAc(5)Hex(6)Fuc(1)NeuAc(3)	1	64	3.44	116.8	7.5	0.000364926	2.6264e-05	0	0	0.560558	0.0992462	0.0991217	0.111268	High
High	[R].VTPACNTSLPAQR.[W]	1xCarbamidomethyl [C5]; 1xHexNAc(4)Hex(5)Fuc(1)NeuAc(2) [N6]	1	Q9UBG0	Q9UBG0 [64-76]	0	3765.54	HexNAc(4)Hex(5)Fuc(1)NeuAc(2)	0	64	6.9	295.1	67.7	1.25462e-07	3.0025e-08	0	0	0.000443168	0.000106368	0	0	High
High	[R].VTYQNHNK.[T]	1xHexNAc(5)Hex(6)NeuAc(2) [N7]	1	P32004	P32004 [288-295]	0	3573.4	HexNAc(5)Hex(6)NeuAc(2)	0	288	6.6	261.1	47.5	2.49141e-07	4.53729e-08	0	0	0.000879658	0.000160839	0	0	High
High	[R].VTYQNHNK.[T]	1xHexNAc(4)Hex(5)NeuAc(2) [N7]	1	P32004	P32004 [288-295]	0	3208.27	HexNAc(4)Hex(5)NeuAc(2)	0	288	6.66	305.8	43.3	2.19979e-07	4.22187e-08	0	0	0.000776773	0.000149649	0	0	High
High	[R].YEQLQNETR.[Q]	1xHexNAc(2)Hex(8) [N6]	1	P11117	P11117 [162-170]	0	2883.14	HexNAc(2)Hex(8)	0	162	7.53	394.4	164.2	2.96025e-08	7.86855e-09	0	0	0.0001046	2.79417e-05	0	0	High
High	[R].YETTNK.[T]	1xHexNAc(6)Hex(7)Fuc(1)NeuAc(4) [N5]	1	P13473	P13473 [54-59]	0	4418.64	HexNAc(6)Hex(7)Fuc(1)NeuAc(4)	0	54	1.59	102.6	11.9	0.0256509	0.00407056	0.00364078	0.0045045	0.987293	0.409251	0.409011	0.434318	High
High	[R].YETTNK.[T]	1xHexNAc(7)Hex(8)Fuc(1)NeuAc(3) [N5]	1	P13473	P13473 [54-59]	0	4492.68	HexNAc(7)Hex(8)Fuc(1)NeuAc(3)	1	54	1.73	170.1	4.1	0.0184349	0.00892857	0.00875657	0.01	0.985865	0.477623	0.474674	0.49733	High
High	[R].YETTNK.[T]	1xHexNAc(3)Hex(4)Fuc(1)NeuAc(1) [N5]	1	P13473	P13473 [54-59]	0	2449.96	HexNAc(3)Hex(4)Fuc(1)NeuAc(1)	0	54	2.02	132.9	0.3	0.00960056	0.00407056	0.00376884	0.00463678	0.96941	0.37619	0.37517	0.402502	High
High	[R].YETTNK.[T]	1xHexNAc(5)Hex(6)Fuc(1)NeuAc(1) [N5]	1	P13473	P13473 [54-59]	0	3180.22	HexNAc(5)Hex(6)Fuc(1)NeuAc(1)	0	54	2.31	205.8	11.6	0.00494844	0.00407056	0.00402145	0.00491803	0.942142	0.297089	0.296581	0.323336	High
High	[R].YETTNK.[T]	1xHexNAc(5)Hex(6)Fuc(1)NeuAc(3) [N5]	2	P13473	P13473 [54-59]	0	3762.41	HexNAc(5)Hex(6)Fuc(1)NeuAc(3)	0	54	2.47	217.1	27.1	0.00342293	0.00294551	0.00275482	0.00335008	0.91962	0.254682	0.254443	0.278807	High
High	[R].YETTNK.[T]	1xHexNAc(6)Hex(7)Fuc(1)NeuAc(1) [N5]	1	P13473	P13473 [54-59]	0	3545.36	HexNAc(6)Hex(7)Fuc(1)NeuAc(1)	0	54	2.47	177.3	7.3	0.00342293	0.00294551	0.00274348	0.00334448	0.91962	0.254902	0.254427	0.279261	High
High	[R].YETTNK.[T]	1xHexNAc(6)Hex(7)Fuc(1)NeuAc(2) [N5]	1	P13473	P13473 [54-59]	0	3836.45	HexNAc(6)Hex(7)Fuc(1)NeuAc(2)	0	54	2.52	204.8	13.1	0.0030155	0.00204499	0.00195695	0.00223214	0.920159	0.32538	0.325027	0.347271	High
High	[R].YETTNK.[T]	1xHexNAc(4)Hex(5)Fuc(1)NeuAc(1) [N5]	1	P13473	P13473 [54-59]	0	2815.09	HexNAc(4)Hex(5)Fuc(1)NeuAc(1)	0	54	3.21	205.6	39.9	0.000613012	3.23004e-05	0	0	0.680881	0.111383	0.11084	0.123978	High
High	[R].YETTNK.[T]	1xHexNAc(6)Hex(7)Fuc(1)NeuAc(3) [N5]	3	P13473	P13473 [54-59]	0	4127.55	HexNAc(6)Hex(7)Fuc(1)NeuAc(3)	0	54	3.8	195.8	56.5	0.000160138	1.02013e-05	0	0	0.359539	0.045858	0.0455882	0.0514096	High
High	[R].YETTNK.[T]	1xHexNAc(5)Hex(6)Fuc(1)NeuAc(2) [N5]	3	P13473	P13473 [54-59]	0	3471.32	HexNAc(5)Hex(6)Fuc(1)NeuAc(2)	0	54	5.02	241.5	4.8	9.61764e-06	9.88749e-07	0	0	0.0328705	0.00736648	0.00733945	0.00821355	High
High	[R].YETTNK.[T]	1xHexNAc(4)Hex(5)Fuc(1)NeuAc(2) [N5]	2	P13473	P13473 [54-59]	0	3106.19	HexNAc(4)Hex(5)Fuc(1)NeuAc(2)	0	54	5.78	245.1	53.7	1.66347e-06	1.59166e-07	0	0	0.00584414	0.00478469	0.00471698	0.00526316	High
High	[R].YFNIDPNATQASGNCGTR.[K]	1xCarbamidomethyl [C15]; 1xHexNAc(4)Hex(5)Fuc(1)NeuAc(2) [N7]	1	Q9UQV4	Q9UQV4 [260-277]	0	4336.71	HexNAc(4)Hex(5)Fuc(1)NeuAc(2)	1	260	5.31	158.2	58	4.89328e-06	6.00333e-07	0	0	0.0169983	0.00677201	0.00585937	0.00656455	High
High	[R].YFNIDPNATQASGNCGTR.[K]	1xCarbamidomethyl [C15]; 1xHexNAc(4)Hex(5)Fuc(1)NeuAc(1) [N7]	1	Q9UQV4	Q9UQV4 [260-277]	0	4045.61	HexNAc(4)Hex(5)Fuc(1)NeuAc(1)	0	260	5.52	200.7	124.9	3.03999e-06	3.29031e-07	0	0	0.0106288	0.00677201	0.00638298	0.00712589	High
High	[R].YHNQTLR.[Y]	1xHexNAc(2)Hex(7) [N3]	1	P11717	P11717 [398-404]	0	2472	HexNAc(2)Hex(7)	0	398	2.36	218.3	18.9	0.00441019	0.00204499	0.00188679	0.00214592	0.944123	0.394222	0.393855	0.417245	High
High	[R].YHNQTLR.[Y]	1xHexNAc(2)Hex(9) [N3]	1	P11717	P11717 [398-404]	0	2796.11	HexNAc(2)Hex(9)	0	398	2.56	202.5	10.7	0.00274155	0.00204499	0.0020202	0.00230415	0.912531	0.272613	0.27193	0.291498	High
High	[R].YHNQTLR.[Y]	1xHexNAc(2)Hex(8) [N3]	1	P11717	P11717 [398-404]	0	2634.06	HexNAc(2)Hex(8)	0	398	5.93	312.2	83.2	1.16536e-06	1.26815e-07	0	0	0.00410134	0.00246914	0.00242718	0.0027027	High
High	[R].YHSQTYGNGSK.[C]	1xHexNAc(2)Hex(8) [N8]	1	Q13438	Q13438 [170-180]	0	2944.14	HexNAc(2)Hex(8)	0	170	6.15	350.1	126.1	7.11918e-07	8.10167e-08	0	0	0.00250952	0.000274491	0	0	High
High	[R].YHSQTYGNGSK.[C]	1xHexNAc(2)Hex(9) [N8]	1	Q13438	Q13438 [170-180]	0	3106.19	HexNAc(2)Hex(9)	0	170	7.35	402.3	204.9	4.50693e-08	1.39689e-08	0	0	0.000159244	4.92677e-05	0	0	High
High	[R].YHYNGTFEDGK.[K]	1xHexNAc(2)Hex(8) [N4]	1	Q96AY3	Q96AY3 [67-77]	0	3033.15	HexNAc(2)Hex(8)	0	67	7.06	317	111	8.69031e-08	2.3442e-08	0	0	0.00030701	8.29823e-05	0	0	High
High	[R].YKPDTLAVAVENGTGTDR.[Q]	1xHexNAc(5)Hex(6)NeuAc(2) [N12]	1	Q9H0X4	Q9H0X4 [378-395]	0	4476.86	HexNAc(5)Hex(6)NeuAc(2)	1	378	1.99	145.8	59.6	0.0102992	0.00407056	0.00375469	0.0046225	0.017162	0.00677201	0.00584795	0.00655022	High
High	[R].YNYSEALTFDPQK.[G]	1xHexNAc(5)Hex(4)Fuc(1)NeuAc(1) [N2]	1	Q9H3R1	Q9H3R1 [792-804]	0	3676.49	HexNAc(5)Hex(4)Fuc(1)NeuAc(1)	0	792	1.2	108.4	41.6	0.0637279	0.00937866	0.00934579	0.011544	0.0796538	0.015625	0.0155709	0.0174081	High
High	[R].YYNQSEAGSHTLQR.[M]	1xHexNAc(7)Hex(8)Fuc(1) [N3]	1	P30485	P30485 [108-121]	0	4517.8	HexNAc(7)Hex(8)Fuc(1)	0	108	2.6	140	28.9	0.00249668	0.00294551	0.00278164	0.00337268	0.89411	0.243996	0.243762	0.267725	High
High	[R].YYNQSEAGSHTLQR.[M]	1xHexNAc(5)Hex(6)Fuc(1)NeuAc(2) [N3]	1	P30485	P30485 [108-121]	0	4369.72	HexNAc(5)Hex(6)Fuc(1)NeuAc(2)	1	108	4.12	178.9	82.8	7.55004e-05	4.77833e-06	0	0	0.22664	0.0440529	0.0437637	0.0479616	High
High	[R].YYNQSEAGSHTLQR.[M]	1xHexNAc(5)Hex(6)Fuc(1)NeuAc(3) [N3]	1	P30485	P30485 [108-121]	0	4660.82	HexNAc(5)Hex(6)Fuc(1)NeuAc(3)	0	108	7.45	422.6	255.3	3.52605e-08	9.7816e-09	0	0	0.000124591	3.43104e-05	0	0	High
High	[R].YYNQSEAGSHTLQR.[M]	1xHexNAc(4)Hex(5)Fuc(1)NeuAc(1) [N3]	2	P30485	P30485 [108-121]	0	3713.5	HexNAc(4)Hex(5)Fuc(1)NeuAc(1)	0	108	7.71	479.1	226.6	1.96007e-08	5.59063e-09	0	0	7.64015e-05	2.25265e-05	0	0	High
High	[R].YYNQSEAGSHTLQR.[M]	1xHexNAc(4)Hex(5)Fuc(1)NeuAc(2) [N3]	1	P30485	P30485 [108-121]	0	4004.59	HexNAc(4)Hex(5)Fuc(1)NeuAc(2)	1	108	8.1	455.2	266.7	7.91811e-09	2.14141e-09	0	0	2.79808e-05	7.61285e-06	0	0	High
High	[K].AAIPSALDTNSSK.[S]	1xHexNAc(2)Hex(3) [N10]	1	Q08380	Q08380 [542-554]	0	2166.98	HexNAc(2)Hex(3)	0	542	7.45	361	252	3.55544e-08	5.8002e-09	0	0	4.16833e-06	6.94511e-07	0	0	High
High	[K].AAIPSALDTNSSK.[S]	1xHexNAc(2)Hex(3)Fuc(1) [N10]	2	Q08380	Q08380 [542-554]	0	2313.03	HexNAc(2)Hex(3)Fuc(1)	0	542	7.03	382.6	243.5	9.22678e-08	1.79124e-08	0	0	1.08173e-05	2.18858e-06	0	0	High
High	[K].AAIPSALDTNSSK.[S]	1xHexNAc(2)Hex(6) [N10]	2	Q08380	Q08380 [542-554]	0	2653.13	HexNAc(2)Hex(6)	0	542	6.67	399.4	246.7	2.14753e-07	4.74624e-08	0	0	2.51769e-05	5.63382e-06	0	0	High
High	[K].AAIPSALDTNSSK.[S]	1xHexNAc(6)Hex(3) [N10]	1	Q08380	Q08380 [542-554]	0	2979.29	HexNAc(6)Hex(3)	0	542	5.68	405	200.7	2.08505e-06	3.67953e-07	0	0	0.000253012	4.54144e-05	0	0	High
High	[K].AEFNITLIHPK.[D]	1xHexNAc(2)Hex(7) [N4]	1	P15144	P15144 [231-241]	0	2823.24	HexNAc(2)Hex(7)	0	231	7.01	349.9	157.2	9.66121e-08	1.99358e-08	0	0	1.13266e-05	2.4562e-06	0	0	High
High	[K].AEFNITLIHPK.[D]	1xHexNAc(2)Hex(6) [N4]	1	P15144	P15144 [231-241]	0	2661.19	HexNAc(2)Hex(6)	0	231	6.82	325.4	138.8	1.50257e-07	3.23218e-08	0	0	1.76157e-05	3.89012e-06	0	0	High
High	[K].AEFNITLIHPK.[D]	1xHexNAc(2)Hex(5) [N4]	1	P15144	P15144 [231-241]	0	2499.14	HexNAc(2)Hex(5)	0	231	1.63	117.7	20.6	0.0233612	0.00607165	0.00600962	0.00712251	0.684404	0.0572792	0.0567041	0.0613418	High
High	[K].AEFNITLIHPK.[D]	1xHexNAc(2)Hex(8) [N4]	2	P15144	P15144 [231-241]	0	2985.3	HexNAc(2)Hex(8)	0	231	1.63	164	33.9	0.0233612	0.00607165	0.00601323	0.00712758	0.684404	0.0572792	0.0567376	0.0613811	High
High	[K].AFNQSSNLIK.[H]	1xHexNAc(2)Hex(3)Fuc(1) [N3]	1	Q03923	Q03923 [238-247]	0	2159.97	HexNAc(2)Hex(3)Fuc(1)	0	238	1.93	203.5	4.3	0.0116806	0.00369231	0.00367422	0.00434783	0.019356	0.00444774	0.0043956	0.00473186	High
High	[K].ALSPNSTISSAPK.[D]	1xHexNAc(2)Hex(6) [N5]	2	Q9UH99	Q9UH99 [632-644]	0	2651.16	HexNAc(2)Hex(6)	0	632	3.37	192.5	73.2	0.00042797	0.00143575	0.00141945	0.00165563	0.00206914	0.00185874	0.00179051	0.00190295	High
High	[K].ALSPNSTISSAPK.[D]	1xHexNAc(2)Hex(7) [N5]	1	Q9UH99	Q9UH99 [632-644]	0	2813.21	HexNAc(2)Hex(7)	0	632	1.06	76.7	4.9	0.086289	0.00809249	0.00799087	0.00881954	0.402235	0.0321564	0.0321361	0.0348123	High
High	[K].ANTTQPGIVEGGQVLK.[C]	1xHexNAc(2)Hex(6) [N2]	1	P06756	P06756 [73-88]	0	2990.35	HexNAc(2)Hex(6)	0	73	10.69	626.4	454.9	2.03992e-11	3.60844e-12	0	0	2.39158e-09	4.23585e-10	0	0	High
High	[K].ANTTQPGIVEGGQVLK.[C]	1xHexNAc(2)Hex(7) [N2]	1	P06756	P06756 [73-88]	0	3152.4	HexNAc(2)Hex(7)	0	73	9.69	586	431.7	2.03992e-10	3.0234e-11	0	0	2.39158e-08	3.36696e-09	0	0	High
High	[K].ANTTQPGIVEGGQVLK.[C]	1xHexNAc(3)Hex(6) [N2]	1	P06756	P06756 [73-88]	0	3193.43	HexNAc(3)Hex(6)	0	73	6.16	242.1	80.1	6.89937e-07	1.4419e-07	0	0	8.08824e-05	1.72501e-05	0	0	High
High	[K].ANTTQPGIVEGGQVLK.[C]	1xHexNAc(4)Hex(5)Fuc(1) [N2]	1	P06756	P06756 [73-88]	0	3380.51	HexNAc(4)Hex(5)Fuc(1)	0	73	5.79	299.9	176.6	1.60854e-06	2.85293e-07	0	0	0.000188556	3.4382e-05	0	0	High
High	[K].ANTTQPGIVEGGQVLK.[C]	1xHexNAc(3)Hex(5)Fuc(1) [N2]	1	P06756	P06756 [73-88]	0	3177.43	HexNAc(3)Hex(5)Fuc(1)	0	73	5.75	269.7	155.7	1.7886e-06	3.13076e-07	0	0	0.000209659	3.77395e-05	0	0	High
High	[K].ANTTQPGIVEGGQVLK.[C]	1xHexNAc(2)Hex(5) [N2]	1	P06756	P06756 [73-88]	0	2828.29	HexNAc(2)Hex(5)	0	73	4.17	146.2	101	6.693e-05	5.1089e-06	0	0	0.00780055	0.00249169	0.00240577	0.00257511	High
High	[K].ANTTQPGIVEGGQVLK.[C]	1xHexNAc(3)Hex(4)Fuc(1) [N2]	1	P06756	P06756 [73-88]	0	3015.38	HexNAc(3)Hex(4)Fuc(1)	0	73	2.27	63	24.4	0.00531165	0.00257566	0.0025413	0.00299177	0.328984	0.0221066	0.0220923	0.0238932	High
High	[K].APDPAWSANATK.[G]	1xHexNAc(3)Hex(6) [N9]	1	Q14D33	Q14D33 [157-168]	0	2810.15	HexNAc(3)Hex(6)	0	157	0.99	115.4	40.9	0.101986	0.009656	0.00962117	0.0106308	0.144907	0.0101083	0.0100143	0.00997698	High
High	[K].AVSSNISQK.[D]	1xHexNAc(3)Hex(6) [N5]	1	Q709C8	Q709C8 [1586-1594]	0	2515.06	HexNAc(3)Hex(6)	0	1586	1.1	155.8	35.9	0.0799313	0.00849515	0.00848999	0.0100143	0.113599	0.00945454	0.00944081	0.0101246	High
High	[K].CATVTENATGDLATSR.[N]	1xHexNAc(2)Hex(8) [N7]; 1xCarbamidomethyl [C1]	1	O43291	O43291 [88-103]	0	3369.35	HexNAc(2)Hex(8)	0	88	6.83	335.9	223.3	1.47748e-07	3.09461e-08	0	0	1.73215e-05	3.7218e-06	0	0	High
High	[K].CHEGNGTFECGACR.[C]	1xHexNAc(2)Hex(8) [N5]; 3xCarbamidomethyl [C1; C10; C13]	1	P05556	P05556 [477-490]	0	3357.2	HexNAc(2)Hex(8)	0	477	7.21	320	298	6.20624e-08	1.04532e-08	0	0	7.27607e-06	1.27202e-06	0	0	High
High	[K].CHEGNGTFECGACR.[C]	3xCarbamidomethyl [C1; C10; C13]; 1xHexNAc(5)Hex(6) [N5]	1	P05556	P05556 [477-490]	0	3642.33	HexNAc(5)Hex(6)	0	477	5.34	154	111.1	4.60921e-06	5.96544e-07	0	0	0.000540157	7.23071e-05	0	0	High
High	[K].CHEGNGTFECGACR.[C]	1xHexNAc(2)Hex(6) [N5]; 3xCarbamidomethyl [C1; C10; C13]	1	P05556	P05556 [477-490]	0	3033.09	HexNAc(2)Hex(6)	0	477	2.43	1.3	1.3	0.00368443	0.0020284	0.00194679	0.00229008	0.254508	0.0139628	0.013935	0.0150862	High
High	[K].CHEGNGTFECGACR.[C]	3xCarbamidomethyl [C1; C10; C13]; 1xHexNAc(6)Hex(3) [N5]	1	P05556	P05556 [477-490]	0	3359.25	HexNAc(6)Hex(3)	0	477	4.15	230.1	159.2	7.02592e-05	5.02996e-06	0	0	0.0084759	0.0027959	0.00251678	0.00267618	High
High	[K].CNMINGTDGDSFHPLITK.[D]	1xHexNAc(2)Hex(8) [N5]; 1xCarbamidomethyl [C1]; 1xOxidation [M3]; 1xDeamidated [N2]	1	Q14108	Q14108 [245-262]	0	3739.49	HexNAc(2)Hex(8)	0	245	2.57	208.6	143.4	0.00266078	0.0020284	0.00197628	0.00232558	0.00869506	0.00249169	0.00237906	0.00254669	High
High	[K].CNMINGTDGDSFHPLITK.[D]	1xCarbamidomethyl [C1]; 1xOxidation [M3]; 1xHexNAc(6)Hex(4) [N5]	1	Q14108	Q14108 [245-262]	0	3902.61	HexNAc(6)Hex(4)	0	245	2.36	230.4	138.3	0.00437034	0.00257566	0.00256904	0.00301887	0.0142805	0.00302572	0.00302115	0.00324939	High
High	[K].CQVLWMEGWSNSSMK.[K]	1xHexNAc(2)Hex(3)Fuc(1) [N11]; 1xCarbamidomethyl [C1]; 1xDeamidated [Q2]	1	Q8NCM8	Q8NCM8 [2803-2817]	0	2882.16	HexNAc(2)Hex(3)Fuc(1)	0	2803	2.1	83.5	54	0.00788098	0.00316056	0.00310559	0.00367107	0.0194499	0.00444774	0.00438917	0.00472441	High
High	[K].DLDTDFTNNASQPETK.[A]	1xHexNAc(2)Hex(7) [N9]	1	O75976	O75976 [1062-1077]	0	3336.33	HexNAc(2)Hex(7)	0	1062	3.31	138.8	76.9	0.000484644	0.00218182	0.00217865	0.00252738	0.00234578	0.0027959	0.0027907	0.00295566	High
High	[K].DLMVINR.[S]	1xHexNAc(2)Hex(8) [N6]; 1xOxidation [M3]	1	Q96KA5	Q96KA5 [224-230]	0	2579.04	HexNAc(2)Hex(8)	0	224	2.65	180.4	4	0.00225936	0.00218182	0.00206044	0.00239808	0.171424	0.012091	0.0120056	0.0121212	High
High	[K].DMSDGFISNLTIQR.[Q]	1xHexNAc(2)Hex(6) [N9]; 1xOxidation [M2]	1	P13674	P13674 [105-118]	0	2991.24	HexNAc(2)Hex(6)	0	105	6.95	445.2	275.7	1.11033e-07	2.22674e-08	0	0	1.30172e-05	2.73951e-06	0	0	High
High	[K].DMSDGFISNLTIQR.[Q]	1xHexNAc(2)Hex(8) [N9]; 1xOxidation [M2]	1	P13674	P13674 [105-118]	0	3315.34	HexNAc(2)Hex(8)	0	105	6.09	255.2	107.8	8.07589e-07	1.63223e-07	0	0	9.46739e-05	1.95629e-05	0	0	High
High	[K].DMSDGFISNLTIQR.[Q]	1xOxidation [M2]; 1xHexNAc(6)Hex(4) [N9]	1	P13674	P13674 [105-118]	0	3479.45	HexNAc(6)Hex(4)	0	105	5.49	383.2	208.8	3.25603e-06	4.92085e-07	0	0	0.000381622	5.93831e-05	0	0	High
High	[K].DNATEEEILVYLEK.[T]	1xHexNAc(2)Hex(3)Fuc(1) [N2]	1	P07602	P07602 [79-92]	0	2704.2	HexNAc(2)Hex(3)Fuc(1)	0	79	6.76	332.1	219.8	1.75573e-07	3.771e-08	0	0	2.05836e-05	4.46248e-06	0	0	High
High	[K].DSLSINATNIK.[H]	1xHexNAc(2)Hex(7) [N6]	2	P00533	P00533 [347-357]	0	2716.16	HexNAc(2)Hex(7)	0	347	6.78	401	228.2	1.66859e-07	3.54277e-08	0	0	1.9562e-05	4.21329e-06	0	0	High
High	[K].DSLSINATNIK.[H]	1xHexNAc(2)Hex(6) [N6]	2	P00533	P00533 [347-357]	0	2554.1	HexNAc(2)Hex(6)	0	347	6.67	357.5	201.6	2.14498e-07	4.71714e-08	0	0	2.51469e-05	5.59802e-06	0	0	High
High	[K].DTCTQECSYFNITK.[V]	1xHexNAc(2)Hex(6) [N11]; 2xCarbamidomethyl [C3; C7]; 1xDeamidated [Q5]	1	P05556	P05556 [659-672]	0	3146.2	HexNAc(2)Hex(6)	0	659	3.07	178.4	93.7	0.000844228	0.00143575	0.00139082	0.00162866	0.0755763	0.00580973	0.00569395	0.00614912	High
High	[K].DYNVTANSK.[L]	1xHexNAc(3)Hex(6) [N3]	1	P00338	P00338 [82-90]	0	2593.03	HexNAc(3)Hex(6)	0	82	1.93	78	6.3	0.0116313	0.00369231	0.00368098	0.0043573	0.517341	0.0420272	0.0420012	0.0454545	High
High	[K].ENGTDTVQEEEESPAEGSK.[D]	1xHexNAc(2)Hex(5) [N2]	1	Q9Y4L1	Q9Y4L1 [595-613]	0	3252.28	HexNAc(2)Hex(5)	0	595	2.32	59.6	16.9	0.0047646	0.00257566	0.00256082	0.00301205	0.305669	0.019802	0.0197109	0.021322	High
High	[K].ENQNHSYSLK.[S]	1xHexNAc(6)Hex(3) [N4]	1	P06756	P06756 [942-951]	0	2924.2	HexNAc(6)Hex(3)	0	942	1.64	149.5	30.1	0.0226516	0.00607165	0.00603136	0.00715308	0.677538	0.0572792	0.0570749	0.0617761	High
High	[K].ENQNHSYSLK.[S]	1xHexNAc(2)Hex(7) [N4]	1	P06756	P06756 [942-951]	0	2760.1	HexNAc(2)Hex(7)	0	942	1.04	151.3	17.6	0.0919277	0.00908575	0.00907544	0.0101146	0.901526	0.137601	0.137531	0.147523	High
High	[K].ENTSDPSLVIAFGR.[G]	1xHexNAc(2)Hex(2)Fuc(1) [N2]	1	P11279	P11279 [83-96]	0	2382.08	HexNAc(2)Hex(2)Fuc(1)	0	83	8.55	532.8	460.1	2.83325e-09	4.36812e-10	0	0	3.32166e-07	5.07301e-08	0	0	High
High	[K].ENTSDPSLVIAFGR.[G]	1xHexNAc(3)Hex(4)Fuc(1)NeuAc(1) [N2]	1	P11279	P11279 [83-96]	0	3200.36	HexNAc(3)Hex(4)Fuc(1)NeuAc(1)	0	83	6.55	268.3	139.6	2.80655e-07	6.22391e-08	0	0	3.29028e-05	7.40984e-06	0	0	High
High	[K].ENTSDPSLVIAFGR.[G]	1xHexNAc(2)Hex(3)Fuc(1) [N2]	2	P11279	P11279 [83-96]	0	2544.13	HexNAc(2)Hex(3)Fuc(1)	0	83	6.51	258.1	133.2	3.08614e-07	6.965e-08	0	0	3.61805e-05	8.3175e-06	0	0	High
High	[K].ENTSDPSLVIAFGR.[G]	1xHexNAc(2)Hex(7) [N2]	1	P11279	P11279 [83-96]	0	3046.29	HexNAc(2)Hex(7)	0	83	6.46	238	139.8	3.47906e-07	7.6635e-08	0	0	4.07868e-05	9.17098e-06	0	0	High
High	[K].ENTSDPSLVIAFGR.[G]	1xHexNAc(2)Hex(6) [N2]	2	P11279	P11279 [83-96]	0	2884.24	HexNAc(2)Hex(6)	0	83	3.08	140.4	63.6	0.000836966	0.00143575	0.00139276	0.00163132	0.0750097	0.00580973	0.00570207	0.00615858	High
High	[K].ENTSDPSLVIAFGR.[G]	1xHexNAc(3)Hex(4)Fuc(1) [N2]	1	P11279	P11279 [83-96]	0	2909.27	HexNAc(3)Hex(4)Fuc(1)	0	83	2.99	114.1	38.7	0.0010225	0.00143575	0.00138408	0.00162206	0.0892765	0.00580973	0.00567376	0.00613497	High
High	[K].ENTSDPSLVIAFGR.[G]	1xHexNAc(2)Hex(5) [N2]	2	P11279	P11279 [83-96]	0	2722.18	HexNAc(2)Hex(5)	0	83	2.99	36	36	0.00103089	0.00143575	0.00138217	0.00161943	0.0899115	0.00580973	0.00566171	0.00612089	High
High	[K].ENTSDPSLVIAFGR.[G]	1xHexNAc(2)Hex(8) [N2]	1	P11279	P11279 [83-96]	0	3208.34	HexNAc(2)Hex(8)	0	83	4.82	160.2	106.7	1.49626e-05	1.31014e-06	0	0	0.00181365	0.00201005	0.00189934	0.0020141	High
High	[K].EPGSNVTMSVDAECVPMVR.[D]	1xCarbamidomethyl [C14]; 1xHexNAc(2)Hex(4) [N5]; 1xOxidation [M17]	1	Q08380	Q08380 [188-206]	0	3148.3	HexNAc(2)Hex(4)	0	188	6.43	369.9	265.1	3.68695e-07	7.83614e-08	0	0	4.32238e-05	9.38177e-06	0	0	High
High	[K].EQNFSHSISENFSK.[Q]	1xHexNAc(2)Hex(8) [N11]	1	P22888	P22888 [289-302]	0	3356.33	HexNAc(2)Hex(8)	0	289	2.04	166	59.5	0.00921637	0.00316056	0.00308261	0.00364697	0.0182747	0.00444774	0.00444115	0.00476947	High
High	[K].EQYIHENYSR.[A]	1xHexNAc(2)Hex(6) [N7]	1	O60568	O60568 [542-551]	0	2717.08	HexNAc(2)Hex(6)	0	542	7.12	381.2	197.7	7.64583e-08	1.35425e-08	0	0	8.96381e-06	1.6527e-06	0	0	High
High	[K].FLSSSPHLPPSSYFNASGR.[A]	1xHexNAc(2)Hex(3)Fuc(1) [N15]	1	O14773	O14773 [429-447]	0	3089.37	HexNAc(2)Hex(3)Fuc(1)	0	429	2.03	132.8	80.9	0.00928285	0.00316056	0.00308071	0.00364431	0.0184065	0.00444774	0.00443131	0.0047619	High
High	[K].FLSYNVTR.[R]	1xHexNAc(2)Hex(6) [N5]	1	Q8NBL1	Q8NBL1 [369-376]	0	2378	HexNAc(2)Hex(6)	0	369	0.98	187.2	6.5	0.10441	0.00963719	0.00953984	0.0106809	0.145449	0.00960878	0.00958248	0.0103704	High
High	[K].FPFLWNNK.[T]	1xHexNAc(2)Hex(3)Fuc(1) [N7]	1	Q9UJX5	Q9UJX5 [572-579]	0	2103.93	HexNAc(2)Hex(3)Fuc(1)	0	572	2.1	234.5	10.2	0.00803401	0.00392413	0.00388349	0.00456969	0.0159352	0.00317209	0.00314961	0.00336134	High
High	[K].FVPLLPGNR.[S]	1xHexNAc(7)Hex(6) [N8]	1	P78527	P78527 [1194-1202]	0	3406.47	HexNAc(7)Hex(6)	0	1194	1.17	36.2	1.9	0.0680611	0.00739827	0.00733496	0.00865177	0.865394	0.0983796	0.0980392	0.103985	High
High	[K].GDSDFNDSDSDISGDALK.[K]	1xHexNAc(2)Hex(3)Fuc(1) [N6]	1	O95206	O95206 [920-937]	0	2896.14	HexNAc(2)Hex(3)Fuc(1)	0	920	2.55	134.1	76.2	0.00278643	0.00218182	0.00204221	0.00238284	0.00911179	0.0027959	0.0025	0.00266193	High
High	[K].GELNTSIFSSR.[P]	1xHexNAc(2)Hex(9) [N4]	1	Q9UHG3	Q9UHG3 [350-360]	0	3075.24	HexNAc(2)Hex(9)	0	350	5.63	236.6	73	2.32197e-06	3.88355e-07	0	0	0.000272169	4.65858e-05	0	0	High
High	[K].GELNTSIFSSR.[P]	1xHexNAc(2)Hex(6) [N4]	2	Q9UHG3	Q9UHG3 [350-360]	0	2589.08	HexNAc(2)Hex(6)	0	350	5.63	251	97.3	2.32197e-06	3.90339e-07	0	0	0.000272169	4.68255e-05	0	0	High
High	[K].GELNTSIFSSR.[P]	1xHexNAc(2)Hex(5) [N4]	1	Q9UHG3	Q9UHG3 [350-360]	0	2427.03	HexNAc(2)Hex(5)	0	350	4.78	266.1	107.2	1.67021e-05	1.29173e-06	0	0	0.00195524	0.00185874	0.00180018	0.00191388	High
High	[K].GELNTSIFSSR.[P]	1xHexNAc(2)Hex(8) [N4]	2	Q9UHG3	Q9UHG3 [350-360]	0	2913.19	HexNAc(2)Hex(8)	0	350	4.38	176	38	4.1532e-05	3.04332e-06	0	0	0.00485131	0.00185874	0.00167364	0.00178731	High
High	[K].GELNTSIFSSR.[P]	1xHexNAc(2)Hex(7) [N4]	2	Q9UHG3	Q9UHG3 [350-360]	0	2751.13	HexNAc(2)Hex(7)	0	350	2.31	194.5	60.9	0.00495098	0.00257566	0.00254939	0.003003	0.313789	0.0202614	0.0201954	0.0218464	High
High	[K].GEYFVNVTTR.[I]	1xHexNAc(2)Hex(7) [N6]	1	P17301	P17301 [1069-1078]	0	2726.12	HexNAc(2)Hex(7)	0	1069	1.86	181.5	22.9	0.0139091	0.00576923	0.00574346	0.00676183	0.0230529	0.0060241	0.00601504	0.00644641	High
High	[K].GFNWSSTLTK.[H]	1xHexNAc(4)Hex(5)Fuc(1)NeuAc(2) [N3]	1	Q8TF32	Q8TF32 [380-389]	0	3491.4	HexNAc(4)Hex(5)Fuc(1)NeuAc(2)	0	380	0.99	177.5	0	0.103224	0.00963719	0.00955056	0.0106952	0.143799	0.00835655	0.00825877	0.00893522	High
High	[K].GLLPNNSEESGICHK.[Y]	1xCarbamidomethyl [C13]; 1xHexNAc(4)Hex(5)NeuAc(1) [N5]	1	Q9UBH6	Q9UBH6 [428-442]	0	3568.46	HexNAc(4)Hex(5)NeuAc(1)	0	428	1.05	3.8	3.8	0.0896995	0.00809249	0.00796813	0.00879567	0.126435	0.00628492	0.00628053	0.00679758	High
High	[K].GLNLTEDTYKPR.[I]	1xHexNAc(2)Hex(3)Fuc(1) [N3]	1	Q08380	Q08380 [396-407]	0	2445.1	HexNAc(2)Hex(3)Fuc(1)	0	396	7.76	561.4	293.8	1.73034e-08	2.58662e-09	0	0	2.02863e-06	3.18059e-07	0	0	High
High	[K].GLNLTEDTYKPR.[I]	1xHexNAc(2)Hex(6) [N3]	1	Q08380	Q08380 [396-407]	0	2785.2	HexNAc(2)Hex(6)	0	396	2.17	73.4	8.6	0.0067272	0.00316056	0.00313676	0.00369822	0.382734	0.0292621	0.0292249	0.0316586	High
High	[K].GLNLTEDTYKPR.[I]	1xHexNAc(2)Hex(5) [N3]	1	Q08380	Q08380 [396-407]	0	2623.15	HexNAc(2)Hex(5)	0	396	2.17	104.5	16.3	0.0067272	0.00316056	0.0031348	0.00369549	0.382734	0.0292621	0.0292063	0.0316369	High
High	[K].GQTEIQVNCPPAVTENK.[T]	1xHexNAc(2)Hex(8) [N16]; 1xCarbamidomethyl [C9]	1	Q16563	Q16563 [56-72]	0	3587.49	HexNAc(2)Hex(8)	0	56	4.54	139	96.1	2.9137e-05	2.24542e-06	0	0	0.00340719	0.00185874	0.0017138	0.00182815	High
High	[K].GQTEIQVNCPPAVTENK.[T]	1xCarbamidomethyl [C9]; 1xHexNAc(2)Hex(5) [N16]	1	Q16563	Q16563 [56-72]	0	3101.33	HexNAc(2)Hex(5)	0	56	6.03	303.9	216.2	9.26193e-07	1.93864e-07	0	0	0.000112401	2.39445e-05	0	0	High
High	[K].GSLSYLNVTR.[K]	1xHexNAc(2)Hex(3)Fuc(1) [N7]	1	P07339	P07339 [257-266]	0	2147.97	HexNAc(2)Hex(3)Fuc(1)	0	257	7.56	438.7	234.9	2.73993e-08	4.05277e-09	0	0	3.21225e-06	4.87297e-07	0	0	High
High	[K].GSLSYLNVTR.[K]	1xHexNAc(2)Hex(5)Fuc(1) [N7]	2	P07339	P07339 [257-266]	0	2472.08	HexNAc(2)Hex(5)Fuc(1)	0	257	7.07	380.4	150	8.50576e-08	1.59822e-08	0	0	9.97196e-06	1.95221e-06	0	0	High
High	[K].GSLSYLNVTR.[K]	1xHexNAc(2)Hex(2)Fuc(1) [N7]	1	P07339	P07339 [257-266]	0	1985.92	HexNAc(2)Hex(2)Fuc(1)	0	257	6.7	381.5	188.5	2.00286e-07	4.4322e-08	0	0	2.34809e-05	5.24716e-06	0	0	High
High	[K].GSLSYLNVTR.[K]	1xHexNAc(1) [N7]	2	P07339	P07339 [257-266]	0	1312.67	HexNAc(1)	0	257	6.43	517.1	219.9	3.72409e-07	7.8803e-08	0	0	4.36592e-05	9.43566e-06	0	0	High
High	[K].GSLSYLNVTR.[K]	1xHexNAc(2)Hex(2) [N7]	1	P07339	P07339 [257-266]	0	1839.86	HexNAc(2)Hex(2)	0	257	5.82	395.7	164.9	1.5181e-06	2.68329e-07	0	0	0.000177956	3.2157e-05	0	0	High
High	[K].GSLSYLNVTR.[K]	1xHexNAc(2)Rev1 [N7]	1	P07339	P07339 [257-266]	0	1515.75	HexNAc(2)	0	257	5.57	329.1	162	2.67793e-06	4.31101e-07	0	0	0.000313883	5.20117e-05	0	0	High
High	[K].GSLSYLNVTR.[K]	1xHexNAc(2)Hex(4)Fuc(1) [N7]	1	P07339	P07339 [257-266]	0	2310.02	HexNAc(2)Hex(4)Fuc(1)	0	257	1.85	105.9	33.3	0.0140571	0.00488102	0.00486027	0.00575126	0.564604	0.0468085	0.046695	0.0505249	High
High	[K].GSLSYLNVTR.[K]	1xHexNAc(3)Hex(4)Fuc(1)NeuAc(1) [N7]	1	P07339	P07339 [257-266]	0	2804.2	HexNAc(3)Hex(4)Fuc(1)NeuAc(1)	0	257	1.59	150.4	11.1	0.0254549	0.00653207	0.00651659	0.00774103	0.703156	0.0755975	0.0755556	0.0811298	High
High	[K].HFPFDQQNCTMK.[F]	1xHexNAc(2)Hex(8) [N8]; 1xCarbamidomethyl [C9]	1	P17787	P17787 [161-172]	0	3255.25	HexNAc(2)Hex(8)	0	161	1.62	49.4	49.2	0.0238613	0.00607165	0.00598086	0.00709723	0.0395031	0.00580973	0.00577617	0.00622568	High
High	[K].HLLENSTASVSEAER.[K]	1xHexNAc(2)Hex(6) [N5]	1	P42892	P42892 [162-176]	0	3021.28	HexNAc(2)Hex(6)	0	162	7.59	356.8	193	2.56921e-08	3.69758e-09	0	0	3.0121e-06	4.4285e-07	0	0	High
High	[K].HLLENSTASVSEAER.[K]	1xHexNAc(2)Hex(7) [N5]	1	P42892	P42892 [162-176]	0	3183.33	HexNAc(2)Hex(7)	0	162	6.85	275.5	128.7	1.39995e-07	2.84454e-08	0	0	1.64126e-05	3.44327e-06	0	0	High
High	[K].HLLENSTASVSEAER.[K]	1xHexNAc(4)Hex(5)Fuc(1) [N5]	1	P42892	P42892 [162-176]	0	3411.44	HexNAc(4)Hex(5)Fuc(1)	0	162	2.39	111.4	6	0.00407538	0.0020284	0.00193673	0.00227618	0.273922	0.0159151	0.015873	0.0171797	High
High	[K].HLNSSHPR.[S]	1xHexNAc(2)Hex(8) [N3]	1	Q5JTV8	Q5JTV8 [397-404]	0	2650.06	HexNAc(2)Hex(8)	0	397	2.71	255.9	82.2	0.00194959	0.0020284	0.002	0.00234742	0.0063712	0.00249169	0.00245499	0.00262467	High
High	[K].HLNSSHPR.[S]	1xHexNAc(2)Hex(6) [N3]	1	Q5JTV8	Q5JTV8 [397-404]	0	2325.96	HexNAc(2)Hex(6)	0	397	2.29	304.1	98.6	0.00517526	0.00267738	0.00265076	0.003108	0.0169216	0.00317209	0.00313725	0.00335008	High
High	[K].HMSLALNR.[T]	1xHexNAc(2)Hex(7) [N7]; 1xOxidation [M2]	2	P06280	P06280 [186-193]	0	2498.02	HexNAc(2)Hex(7)	0	186	4.89	269.6	81.8	1.28628e-05	1.13549e-06	0	0	0.0015063	0.00185874	0.00182149	0.00193611	High
High	[K].HMSLALNR.[T]	1xHexNAc(2)Hex(6) [N7]; 1xOxidation [M2]	1	P06280	P06280 [186-193]	0	2335.97	HexNAc(2)Hex(6)	0	186	4.28	278.6	59.9	5.26131e-05	3.71871e-06	0	0	0.00635672	0.0027959	0.00259067	0.00275229	High
High	[K].HTNMNLTQLK.[V]	1xHexNAc(2)Hex(7) [N5]; 1xOxidation [M4]	1	Q15165	Q15165 [250-259]	0	2756.14	HexNAc(2)Hex(7)	0	250	6.7	365.4	143.4	1.99876e-07	4.3768e-08	0	0	2.34328e-05	5.17887e-06	0	0	High
High	[K].HTNMNLTQLK.[V]	1xHexNAc(2)Hex(6) [N5]; 1xOxidation [M4]	1	Q15165	Q15165 [250-259]	0	2594.09	HexNAc(2)Hex(6)	0	250	6.1	264.6	87.1	7.9095e-07	1.59226e-07	0	0	9.27234e-05	1.90775e-05	0	0	High
High	[K].IFLNK.[T]	1xHexNAc(2)Hex(3)Fuc(1) [N4]	1	O94915	O94915 [488-492]	0	1672.77	HexNAc(2)Hex(3)Fuc(1)	0	488	1.34	164.3	87	0.0460855	0.00703812	0.00698893	0.0083045	0.0762406	0.00580973	0.00568586	0.00614439	High
High	[K].INFTLR.[V]	1xHexNAc(2)Hex(4) [N2]	1	Q9HAT2	Q9HAT2 [106-111]	0	1817.82	HexNAc(2)Hex(4)	0	106	1.65	130.1	17.7	0.0226205	0.00607165	0.00603865	0.00716332	0.67723	0.0567164	0.0566826	0.0613695	High
High	[K].ISNLTIVQAEIK.[D]	1xHexNAc(2)Hex(6) [N3]	2	Q70UQ0	Q70UQ0 [326-337]	0	2707.25	HexNAc(2)Hex(6)	0	326	6.82	467.4	306.1	1.49942e-07	3.16348e-08	0	0	1.75787e-05	3.80608e-06	0	0	High
High	[K].ISNLTIVQAEIK.[D]	1xHexNAc(2)Hex(5) [N3]	1	Q70UQ0	Q70UQ0 [326-337]	0	2545.2	HexNAc(2)Hex(5)	0	326	4.17	209.3	94.9	6.6988e-05	5.20514e-06	0	0	0.00780727	0.00249169	0.00240192	0.00257069	High
High	[K].ISSLQTTEKNDTVAGQGER.[D]	1xHexNAc(2)Hex(6) [N10]	1	P06756	P06756 [865-883]	1	3412.49	HexNAc(2)Hex(6)	0	865	5.6	253.3	115.8	2.52373e-06	4.11164e-07	0	0	0.000295813	4.93325e-05	0	0	High
High	[K].ISSLQTTEKNDTVAGQGER.[D]	1xHexNAc(2)Hex(7) [N10]; 1xDeamidated [Q5]	1	P06756	P06756 [865-883]	1	3575.52	HexNAc(2)Hex(7)	0	865	1.86	68.2	54.8	0.0137134	0.00576923	0.00575448	0.00677711	0.551924	0.0455712	0.0454545	0.0484429	High
High	[K].IYIPLNK.[T]	1xHexNAc(2)Hex(8) [N6]	1	Q92542	Q92542 [40-46]	0	2563.11	HexNAc(2)Hex(8)	0	40	4.7	222.6	104.1	1.9779e-05	1.58523e-06	0	0	0.00231481	0.00185874	0.00176678	0.00187793	High
High	[K].IYIPLNK.[T]	1xHexNAc(2)Hex(7) [N6]	1	Q92542	Q92542 [40-46]	0	2401.05	HexNAc(2)Hex(7)	0	40	3.83	137.2	74.5	0.000147712	0.000734214	0.000733676	0.000845308	0.0170939	0.00302572	0.00297398	0.00319489	High
High	[K].IYIPLNK.[T]	1xHexNAc(2)Hex(6) [N6]	1	Q92542	Q92542 [40-46]	0	2239	HexNAc(2)Hex(6)	0	40	1.05	156.1	61.4	0.0895947	0.00809249	0.00797266	0.00880162	0.898972	0.130855	0.130789	0.140187	High
High	[K].KDTCTQECSYFNITK.[V]	1xHexNAc(2)Hex(6) [N12]; 2xCarbamidomethyl [C4; C8]	1	P05556	P05556 [658-672]	1	3273.31	HexNAc(2)Hex(6)	0	658	7.22	270.8	165.9	6.02456e-08	1.00643e-08	0	0	7.06307e-06	1.22398e-06	0	0	High
High	[K].KDTCTQECSYFNITK.[V]	2xCarbamidomethyl [C4; C8]; 1xHexNAc(4)Hex(5)Fuc(1) [N12]	1	P05556	P05556 [658-672]	1	3663.47	HexNAc(4)Hex(5)Fuc(1)	0	658	4.08	103.4	44.1	8.38146e-05	6.53454e-06	0	0	0.00975391	0.00249169	0.0023511	0.00251889	High
High	[K].KLNYTLSQGHR.[V]	1xHexNAc(2)Hex(6) [N3]	1	P15144	P15144 [126-136]	1	2695.18	HexNAc(2)Hex(6)	0	126	2.27	232.7	77.7	0.00533578	0.00267738	0.00263852	0.00309597	0.324419	0.0216802	0.0216509	0.0226277	High
High	[K].LENLSSSEMGYTATLTR.[T]	1xOxidation [M9]; 1xHexNAc(2)Hex(5) [N3]	1	P10253	P10253 [138-154]	0	3105.32	HexNAc(2)Hex(5)	0	138	5.91	248.7	175	1.23855e-06	2.32554e-07	0	0	0.00014519	2.76435e-05	0	0	High
High	[K].LGIYADVGNK.[T]	1xHexNAc(2)Hex(3)Fuc(1) [N9]	1	P06280	P06280 [131-140]	0	2087.94	HexNAc(2)Hex(3)Fuc(1)	0	131	7.56	461.2	251.8	2.73993e-08	3.98224e-09	0	0	3.21225e-06	4.78478e-07	0	0	High
High	[K].LGVIEDHSNR.[T]	1xHexNAc(2)Hex(8) [N9]	1	P14625	P14625 [494-503]	0	2842.16	HexNAc(2)Hex(8)	0	494	2.78	133.8	51	0.00164732	0.0020284	0.00202156	0.00236967	0.134315	0.00835655	0.00829302	0.00897532	High
High	[K].LGVIEDHSNR.[T]	1xHexNAc(2)Hex(9) [N9]	1	P14625	P14625 [494-503]	0	3004.21	HexNAc(2)Hex(9)	0	494	2.33	180.9	44.2	0.00467847	0.00267738	0.00266489	0.00312012	0.296565	0.0192572	0.0192176	0.0199704	High
High	[K].LIDNNK.[T]	1xHexNAc(2)Hex(3)Fuc(1) [N5]	4	P07602	P07602 [328-333]	0	1754.77	HexNAc(2)Hex(3)Fuc(1)	0	328	4.32	235.1	9.7	4.76314e-05	3.57151e-06	0	0	0.00556078	0.00249169	0.00247934	0.00265018	High
High	[K].LIDNNK.[T]	1xHexNAc(2)Hex(4) [N5]	2	P07602	P07602 [328-333]	0	1770.76	HexNAc(2)Hex(4)	0	328	2.76	268.9	14.6	0.00172255	0.0020284	0.00201748	0.00236593	0.139446	0.00835655	0.00827586	0.00895522	High
High	[K].LIDNNK.[T]	1xHexNAc(2)Hex(3) [N5]	1	P07602	P07602 [328-333]	0	1608.71	HexNAc(2)Hex(3)	0	328	1.65	183.4	2.1	0.0226205	0.00607165	0.00605327	0.0071736	0.67723	0.0475904	0.0475617	0.0514658	High
High	[K].LIDNNK.[T]	1xHexNAc(2)Hex(7) [N5]	2	P07602	P07602 [328-333]	0	2256.92	HexNAc(2)Hex(7)	0	328	1.63	150.4	1.8	0.0236311	0.00607165	0.00598444	0.00710227	0.686942	0.059719	0.0596491	0.064557	High
High	[K].LIDNNK.[T]	1xHexNAc(2)Hex(2)Fuc(1) [N5]	1	P07602	P07602 [328-333]	0	1592.72	HexNAc(2)Hex(2)Fuc(1)	0	328	1.22	52.6	10.1	0.0607293	0.00703812	0.00697269	0.00828157	0.853948	0.0903156	0.0902664	0.0965274	High
High	[K].LIDNNK.[T]	1xHexNAc(2)Hex(4)Fuc(1) [N5]	1	P07602	P07602 [328-333]	0	1916.82	HexNAc(2)Hex(4)Fuc(1)	0	328	1.11	222.7	14.5	0.078389	0.00809249	0.00808314	0.00891632	0.884884	0.100376	0.100268	0.107371	High
High	[K].LIDNNK.[T]	1xHexNAc(2)Hex(5)Fuc(1) [N5]	1	P07602	P07602 [328-333]	0	2078.87	HexNAc(2)Hex(5)Fuc(1)	0	328	1.55	162.7	14.6	0.0284204	0.00688791	0.00685785	0.00810015	0.720782	0.066217	0.0657734	0.0704875	High
High	[K].LIDNNKTEK.[E]	1xHexNAc(2)Hex(4) [N5]	2	P07602	P07602 [328-336]	1	2128.95	HexNAc(2)Hex(4)	0	328	4.91	260.9	72.8	1.23848e-05	1.10525e-06	0	0	0.00145039	0.00185874	0.00182648	0.00194175	High
High	[K].LIDNNKTEK.[E]	1xHexNAc(2)Hex(4)Fuc(1) [N5]	2	P07602	P07602 [328-336]	1	2275.01	HexNAc(2)Hex(4)Fuc(1)	0	328	4.91	253.3	68.7	1.23848e-05	1.1152e-06	0	0	0.00145039	0.00185874	0.00182482	0.00193986	High
High	[K].LIDNNKTEK.[E]	1xHexNAc(2)Hex(3)Fuc(1) [N5]	2	P07602	P07602 [328-336]	1	2112.95	HexNAc(2)Hex(3)Fuc(1)	0	328	4.48	285.6	54.6	3.27446e-05	2.4801e-06	0	0	0.00382783	0.00185874	0.00169924	0.00181324	High
High	[K].LIDNNKTEK.[E]	1xHexNAc(2)Hex(5)Fuc(1) [N5]	1	P07602	P07602 [328-336]	1	2437.06	HexNAc(2)Hex(5)Fuc(1)	0	328	2.85	216.1	36.3	0.00139977	0.00143575	0.00136054	0.0015949	0.117001	0.00580973	0.00560224	0.00606061	High
High	[K].LIDNNKTEK.[E]	1xHexNAc(2)Hex(6) [N5]	1	P07602	P07602 [328-336]	1	2453.05	HexNAc(2)Hex(6)	0	328	1.93	191.8	19.4	0.011668	0.00369231	0.00367872	0.00435414	0.518132	0.0432366	0.0431832	0.046729	High
High	[K].LIDNNKTEK.[E]	1xHexNAc(2)Hex(5) [N5]	2	P07602	P07602 [328-336]	1	2291	HexNAc(2)Hex(5)	0	328	1.07	83.4	58.8	0.0849446	0.00809249	0.00800915	0.00883752	0.893513	0.117094	0.117005	0.125422	High
High	[K].LIDNNKTEK.[E]	1xHexNAc(2)Hex(2)Fuc(1) [N5]	2	P07602	P07602 [328-336]	1	1950.9	HexNAc(2)Hex(2)Fuc(1)	0	328	1.05	159.2	60.7	0.0887509	0.00809249	0.00798176	0.00880759	0.898019	0.130301	0.130036	0.139394	High
High	[K].LKVPESENNK.[T]	1xHexNAc(2)Hex(6) [N9]	1	Q5JRA6	Q5JRA6 [238-247]	1	2536.09	HexNAc(2)Hex(6)	0	238	2.43	254.1	91.9	0.00369595	0.0020284	0.00194553	0.00228833	0.0120772	0.00249169	0.00229885	0.00246914	High
High	[K].LLNGSQR.[V]	1xHexNAc(2)Hex(6) [N3]	1	Q32P28	Q32P28 [465-471]	0	2165.92	HexNAc(2)Hex(6)	0	465	2.98	189.6	77.6	0.00104542	0.00143575	0.00138026	0.00161812	0.00341657	0.00185874	0.00171233	0.00182648	High
High	[K].LLNNLTSIK.[I]	1xHexNAc(2)Hex(8) [N4]	1	P11047	P11047 [647-655]	0	2718.2	HexNAc(2)Hex(8)	0	647	2.41	148.8	56.9	0.00389825	0.0020284	0.00194301	0.00228484	0.26525	0.0159151	0.0159046	0.0172166	High
High	[K].LLNNLTSIK.[I]	1xHexNAc(2)Hex(7) [N4]; 1xDeamidated [N3]	1	P11047	P11047 [647-655]	0	2557.13	HexNAc(2)Hex(7)	0	647	1.03	55.1	4.4	0.0932574	0.00963719	0.00961538	0.0107672	0.90293	0.143644	0.143572	0.154137	High
High	[K].LNLSTR.[P]	1xHexNAc(2)Hex(9) [N2]	1	P26639	P26639 [496-501]	0	2568.04	HexNAc(2)Hex(9)	0	496	1.41	14.6	1.6	0.0385041	0.00688791	0.00681537	0.00804094	0.779264	0.0775656	0.0775194	0.0832258	High
High	[K].LNYTLSQGHR.[V]	1xHexNAc(2)Hex(6) [N2]	1	P15144	P15144 [127-136]	0	2567.09	HexNAc(2)Hex(6)	0	127	7.07	361	166.3	8.58742e-08	1.63014e-08	0	0	1.00677e-05	1.99133e-06	0	0	High
High	[K].LNYTLSQGHR.[V]	1xHexNAc(4)Hex(5) [N2]	1	P15144	P15144 [127-136]	0	2811.19	HexNAc(4)Hex(5)	0	127	1.87	132.1	4.9	0.013601	0.00488102	0.00487211	0.00576369	0.556426	0.044703	0.044621	0.0482804	High
High	[K].LNYTLSQGHR.[V]	1xHexNAc(2)Hex(7) [N2]	1	P15144	P15144 [127-136]	0	2729.14	HexNAc(2)Hex(7)	0	127	5.93	309.9	70.2	1.17407e-06	2.54889e-07	0	0	0.00014248	3.14895e-05	0	0	High
High	[K].LPNLTHLNLSGNK.[L]	1xHexNAc(3)Hex(6) [N3]	1	Q92688	Q92688 [87-99]	0	3002.35	HexNAc(3)Hex(6)	0	87	3.93	42	39.3	0.000116155	8.5763e-06	0	0	0.0134792	0.00249169	0.00227964	0.00245098	High
High	[K].LTQGICLEQNK.[T]	1xHexNAc(2)Hex(9) [N10]; 1xCarbamidomethyl [C6]	1	P28906	P28906 [185-195]	0	3168.3	HexNAc(2)Hex(9)	0	185	1.4	241.4	8.2	0.0397882	0.00653207	0.00645161	0.0076655	0.0658333	0.00580973	0.00573477	0.00618716	High
High	[K].LVANESVPFETSCR.[Y]	1xCarbamidomethyl [C13]; 1xHexNAc(2)Hex(6) [N4]	1	Q9NXG6	Q9NXG6 [345-358]	0	2987.24	HexNAc(2)Hex(6)	0	345	1.83	147.8	55	0.014881	0.00576923	0.00572155	0.00673149	0.0246599	0.0060241	0.00599251	0.00642055	High
High	[K].LVGGPVAGGDPNQTIR.[G]	1xHexNAc(2)Hex(8) [N12]	1	O15230	O15230 [84-99]	0	3253.41	HexNAc(2)Hex(8)	0	84	7.14	375.5	206.6	7.31806e-08	1.43446e-08	0	0	8.88173e-06	1.79667e-06	0	0	High
High	[K].MAAALNATGR.[P]	1xOxidation [M1]; 1xHexNAc(2)Hex(3) [N6]	1	P17050	P17050 [172-181]	0	1883.82	HexNAc(2)Hex(3)	0	172	5.85	285.2	141.3	1.41814e-06	2.58736e-07	0	0	0.00016624	3.08282e-05	0	0	High
High	[K].MAAALNATGR.[P]	1xHexNAc(2)Hex(7) [N6]; 1xOxidation [M1]	2	P17050	P17050 [172-181]	0	2532.03	HexNAc(2)Hex(7)	0	172	1.12	150.7	16.3	0.0759693	0.00754498	0.00752315	0.00892857	0.881385	0.0986523	0.098493	0.105355	High
High	[K].MCLNR.[T]	1xCarbamidomethyl [C2]; 1xHexNAc(2)Hex(7) [N4]; 1xOxidation [M1]	1	Q13510	Q13510 [339-343]	0	2249.84	HexNAc(2)Hex(7)	0	339	1.28	19.4	5.8	0.0520131	0.00739827	0.00738916	0.00872093	0.828545	0.0818991	0.0818505	0.0879332	High
High	[K].MGSNLTASEEEFLR.[T]	1xOxidation [M1]; 1xHexNAc(5)Hex(5)Fuc(1)NeuAc(2) [N4]	1	Q9NSA3	Q9NSA3 [29-42]	0	4153.64	HexNAc(5)Hex(5)Fuc(1)NeuAc(2)	1	29	1.39	104.9	0.6	0.0408557	0.00703812	0.00702576	0.00834492	0.0675977	0.00580973	0.00572656	0.00617761	High
High	[K].MNFTGGDTCHK.[V]	1xCarbamidomethyl [C9]; 1xHexNAc(6)Hex(3) [N2]	1	P11717	P11717 [1311-1321]	0	2972.15	HexNAc(6)Hex(3)	0	1311	2.71	211.2	43.5	0.00193976	0.0020284	0.00200133	0.00234926	0.153891	0.0116359	0.0116041	0.0125647	High
High	[K].MNFTGGDTCHK.[V]	1xCarbamidomethyl [C9]; 1xHexNAc(2)Hex(7) [N2]; 1xOxidation [M1]	2	P11717	P11717 [1311-1321]	0	2824.04	HexNAc(2)Hex(7)	0	1311	6.71	321.1	249	1.97227e-07	4.41645e-08	0	0	2.39366e-05	5.46969e-06	0	0	High
High	[K].NATALYHVEAFK.[T]	1xHexNAc(2)Hex(6) [N1]	1	Q9UNW1	Q9UNW1 [242-253]	0	2742.18	HexNAc(2)Hex(6)	0	242	1.91	192.8	6.4	0.0124093	0.00427611	0.0042735	0.00505415	0.0205634	0.00509461	0.00509091	0.00548589	High
High	[K].NATLAEQAK.[L]	1xHexNAc(2)Hex(5) [N1]	1	Q9Y4L1	Q9Y4L1 [869-877]	0	2161.92	HexNAc(2)Hex(5)	0	869	6.28	240.3	106.9	5.21026e-07	1.05589e-07	0	0	6.10816e-05	1.26284e-05	0	0	High
High	[K].NDRNSSDETFLK.[D]	1xHexNAc(2)Hex(3)Fuc(1) [N4]	1	Q14956	Q14956 [246-257]	1	2464.04	HexNAc(2)Hex(3)Fuc(1)	0	246	1.36	306.1	97.8	0.0439288	0.00688791	0.00678593	0.00801165	0.0624643	0.00747943	0.00740192	0.00792393	High
High	[K].NEDCEKGNDSK.[K]	1xHexNAc(2)Hex(9) [N8]; 1xCarbamidomethyl [C4]	1	Q9UMY1	Q9UMY1 [146-156]	1	3160.15	HexNAc(2)Hex(9)	0	146	2.1	161.6	74.5	0.00794369	0.00316056	0.00309789	0.003663	0.0157514	0.00302572	0.0029873	0.00321027	High
High	[K].NEDCEKGNDSK.[K]	1xHexNAc(2)Hex(8) [N8]; 1xCarbamidomethyl [C4]	1	Q9UMY1	Q9UMY1 [146-156]	1	2998.1	HexNAc(2)Hex(8)	0	146	2.03	134.9	89.7	0.00937133	0.00452196	0.00451031	0.00531108	0.0185875	0.00389712	0.00385505	0.00412541	High
High	[K].NFSFK.[R]	1xHexNAc(2)Hex(9) [N1]	1	Q9Y5P3	Q9Y5P3 [465-469]	0	2506.96	HexNAc(2)Hex(9)	0	465	1.09	144.2	52.9	0.0814284	0.00849515	0.00848485	0.0100071	0.134594	0.0101083	0.0100792	0.0100464	High
High	[K].NFSFK.[R]	1xHexNAc(2)Hex(8) [N1]	1	Q9Y5P3	Q9Y5P3 [465-469]	0	2344.91	HexNAc(2)Hex(8)	0	465	0.98	169.9	19	0.103758	0.009656	0.00960961	0.0106157	0.171424	0.012091	0.0119972	0.012112	High
High	[K].NFTMNEK.[L]	1xHexNAc(2)Hex(7) [N1]; 1xOxidation [M4]	1	Q92820	Q92820 [203-209]	0	2439.92	HexNAc(2)Hex(7)	0	203	2.52	196.1	66.2	0.00301644	0.0020284	0.00196207	0.00230592	0.00985715	0.00249169	0.00234192	0.00250836	High
High	[K].NGSLFAFR.[G]	1xHexNAc(2)Hex(5) [N1]	1	P04004	P04004 [169-176]	0	2127.9	HexNAc(2)Hex(5)	0	169	5.95	277.4	132.2	1.11312e-06	2.12597e-07	0	0	0.000130487	2.52198e-05	0	0	High
High	[K].NITIVTGAPR.[H]	1xHexNAc(2)Hex(6) [N1]	2	P26006	P26006 [265-274]	0	2420.08	HexNAc(2)Hex(6)	0	265	8.19	576.9	280.5	6.4654e-09	8.95821e-10	0	0	7.57994e-07	1.06285e-07	0	0	High
High	[K].NITIVTGAPR.[H]	1xHexNAc(2)Hex(3) [N1]	1	P26006	P26006 [265-274]	0	1933.92	HexNAc(2)Hex(3)	0	265	7.12	375.2	173.8	7.64583e-08	1.38421e-08	0	0	8.96381e-06	1.68953e-06	0	0	High
High	[K].NITIVTGAPR.[H]	1xHexNAc(2)Hex(5) [N1]	2	P26006	P26006 [265-274]	0	2258.03	HexNAc(2)Hex(5)	0	265	7.07	388.2	160.2	8.50576e-08	1.58227e-08	0	0	9.97196e-06	1.93265e-06	0	0	High
High	[K].NITIVTGAPR.[H]	1xHexNAc(2)Hex(4) [N1]	2	P26006	P26006 [265-274]	0	2095.98	HexNAc(2)Hex(4)	0	265	7.06	456	211.5	8.70026e-08	1.69393e-08	0	0	1.02e-05	2.06948e-06	0	0	High
High	[K].NITIVTGAPR.[H]	1xHexNAc(2)Hex(8) [N1]	2	P26006	P26006 [265-274]	0	2744.19	HexNAc(2)Hex(8)	0	265	6.51	301.5	112	3.10272e-07	7.07655e-08	0	0	3.63749e-05	8.4539e-06	0	0	High
High	[K].NITIVTGAPR.[H]	1xHexNAc(2)Hex(2) [N1]	1	P26006	P26006 [265-274]	0	1771.87	HexNAc(2)Hex(2)	0	265	6.33	309.6	97	4.71156e-07	9.02533e-08	0	0	5.52353e-05	1.08323e-05	0	0	High
High	[K].NITIVTGAPR.[H]	1xHexNAc(2)Hex(7) [N1]	2	P26006	P26006 [265-274]	0	2582.13	HexNAc(2)Hex(7)	0	265	5.96	292.3	109.3	1.09943e-06	2.08369e-07	0	0	0.000128883	2.47045e-05	0	0	High
High	[K].NITIVTGAPR.[H]	1xHexNAc(2)Hex(1) [N1]	1	P26006	P26006 [265-274]	0	1609.82	HexNAc(2)Hex(1)	0	265	4.17	141.7	72	6.75476e-05	5.25358e-06	0	0	0.0078721	0.00249169	0.0024	0.00256849	High
High	[K].NITIVTGAPR.[H]	1xHexNAc(4)Hex(5) [N1]	1	P26006	P26006 [265-274]	0	2664.19	HexNAc(4)Hex(5)	0	265	3.83	157.9	68.9	0.00014663	1.02477e-05	0	0	0.0169703	0.00302572	0.00298063	0.00320256	High
High	[K].NITIVTGAPR.[H]	1xHexNAc(2)Hex(9) [N1]	1	P26006	P26006 [265-274]	0	2906.24	HexNAc(2)Hex(9)	0	265	2.75	135.1	15.2	0.00178706	0.0020284	0.00201207	0.00236035	0.143799	0.00835655	0.00825309	0.00892857	High
High	[K].NITIVTGAPR.[H]	1xHexNAc(2)Hex(10) [N1]	1	P26006	P26006 [265-274]	0	3068.29	HexNAc(2)Hex(10)	0	265	2.48	97.9	89.6	0.00329269	0.00218182	0.00202566	0.00237154	0.22985	0.0132682	0.0132128	0.0134933	High
High	[K].NITIVTGAPR.[H]	1xHexNAc(3)Hex(4)NeuAc(1) [N1]	1	P26006	P26006 [265-274]	0	2590.15	HexNAc(3)Hex(4)NeuAc(1)	0	265	1.18	117.8	31.8	0.0661785	0.00739827	0.00734844	0.00867052	0.861837	0.0923977	0.0922897	0.0991162	High
High	[K].NLTFEGPLPEK.[I]	1xHexNAc(2)Hex(3)Fuc(1) [N1]	2	Q9HAT2	Q9HAT2 [401-411]	0	2283.03	HexNAc(2)Hex(3)Fuc(1)	0	401	7.43	448.3	226.9	3.73592e-08	6.13935e-09	0	0	4.37993e-06	7.36829e-07	0	0	High
High	[K].NLTFEGPLPEK.[I]	1xHexNAc(2)Fuc(1) [N1]	1	Q9HAT2	Q9HAT2 [401-411]	0	1796.87	HexNAc(2)Fuc(1)	0	401	5.3	242.6	129.1	4.99969e-06	6.12771e-07	0	0	0.000585897	7.42589e-05	0	0	High
High	[K].NLTLR.[C]	1xHexNAc(2)Hex(6) [N1]	1	P05362	P05362 [130-134]	0	1994.85	HexNAc(2)Hex(6)	0	130	1.61	167.6	21.4	0.0243812	0.00607165	0.00594884	0.00706215	0.693794	0.0692395	0.069161	0.0748466	High
High	[K].NLTLR.[C]	1xHexNAc(4)Hex(5)Fuc(1)NeuAc(1) [N1]	1	P05362	P05362 [130-134]	0	2676.11	HexNAc(4)Hex(5)Fuc(1)NeuAc(1)	0	130	1.09	49.1	1.4	0.0812546	0.00809249	0.0080506	0.00887978	0.88879	0.106101	0.105988	0.113532	High
High	[K].NLTQSRSTTWK.[L]	1xHexNAc(4)Hex(6)NeuAc(1) [N1]	1	O00370	O00370 [241-251]	1	3397.42	HexNAc(4)Hex(6)NeuAc(1)	0	241	1.02	157.1	43.4	0.0958422	0.00963719	0.00959368	0.0107527	0.133525	0.00835655	0.00829875	0.00898204	High
High	[K].NMSFVNDLTVTQDGR.[K]	1xHexNAc(2)Hex(6) [N1]; 1xOxidation [M2]	1	Q9HDC9	Q9HDC9 [196-210]	0	3091.27	HexNAc(2)Hex(6)	0	196	13.69	766.2	565.9	2.03992e-14	7.36694e-15	0	0	2.39158e-12	8.6369e-13	0	0	High
High	[K].NMSFVNDLTVTQDGR.[K]	1xOxidation [M2]; 1xHexNAc(2)Hex(5) [N1]	1	Q9HDC9	Q9HDC9 [196-210]	0	2929.21	HexNAc(2)Hex(5)	0	196	11.69	699.8	522.6	2.03992e-12	3.98224e-13	0	0	2.39158e-10	4.76014e-11	0	0	High
High	[K].NMSFVNDLTVTQDGR.[K]	1xHexNAc(2)Hex(7) [N1]; 1xOxidation [M2]	1	Q9HDC9	Q9HDC9 [196-210]	0	3253.32	HexNAc(2)Hex(7)	0	196	6.12	340.6	187.1	7.64859e-07	1.56853e-07	0	0	8.96649e-05	1.87892e-05	0	0	High
High	[K].NNHTASILDR.[M]	1xHexNAc(2)Hex(6) [N2]	1	P08962	P08962 [129-138]	0	2519.05	HexNAc(2)Hex(6)	0	129	7.18	426.5	161.6	6.67967e-08	1.13785e-08	0	0	7.8311e-06	1.38622e-06	0	0	High
High	[K].NNHTASILDR.[M]	1xHexNAc(2)Hex(5) [N2]	1	P08962	P08962 [129-138]	0	2357	HexNAc(2)Hex(5)	0	129	5.81	357.3	116.1	1.56299e-06	2.76757e-07	0	0	0.000183218	3.31785e-05	0	0	High
High	[K].NNHTASILDR.[M]	1xHexNAc(4)Hex(5)Fuc(1) [N2]	1	P08962	P08962 [129-138]	0	2909.22	HexNAc(4)Hex(5)Fuc(1)	0	129	5.45	343.4	112.4	3.54227e-06	5.12017e-07	0	0	0.000415161	6.17849e-05	0	0	High
High	[K].NNHTASILDR.[M]	1xHexNAc(3)Hex(6) [N2]	1	P08962	P08962 [129-138]	0	2722.13	HexNAc(3)Hex(6)	0	129	1.8	93.2	0.6	0.0158368	0.00576923	0.00570342	0.00670641	0.587498	0.047619	0.0475888	0.0507197	High
High	[K].NPVGLIGAENATGETDPSHSK.[F]	1xHexNAc(2)Hex(6) [N10]	1	P43251	P43251 [340-360]	0	3472.49	HexNAc(2)Hex(6)	0	340	7.18	251	140.7	6.54849e-08	1.26774e-08	0	0	7.94773e-06	1.58448e-06	0	0	High
High	[K].NTTAPPK.[I]	1xHexNAc(2)Hex(6) [N1]	1	Q96PD2	Q96PD2 [474-480]	0	2106.87	HexNAc(2)Hex(6)	0	474	1.06	173.6	15	0.0879943	0.00809249	0.00798631	0.00881356	0.145449	0.00894085	0.00892857	0.00965825	High
High	[K].PLGLANDTDHYFLR.[Y]	1xHexNAc(3)Hex(4)Fuc(1)NeuAc(1) [N6]	1	Q969N2	Q969N2 [159-172]	0	3326.42	HexNAc(3)Hex(4)Fuc(1)NeuAc(1)	0	159	2.15	176.8	1.8	0.00715627	0.00316056	0.00312305	0.0036846	0.0141902	0.00302572	0.00302343	0.00325203	High
High	[K].QNNGAFNETLFR.[N]	1xHexNAc(2)Hex(7) [N7]	1	P02786	P02786 [721-732]	0	2951.2	HexNAc(2)Hex(7)	0	721	6.64	379.1	185.6	2.31092e-07	5.08423e-08	0	0	2.80466e-05	6.26987e-06	0	0	High
High	[K].QNNGAFNETLFR.[N]	1xHexNAc(6)Hex(4) [N7]	1	P02786	P02786 [721-732]	0	3277.36	HexNAc(6)Hex(4)	0	721	4.38	236.2	101.2	4.21103e-05	3.0098e-06	0	0	0.00509236	0.0027959	0.00262927	0.0027881	High
High	[K].QNNGAFNETLFR.[N]	1xHexNAc(2)Hex(6) [N7]	1	P02786	P02786 [721-732]	0	2789.15	HexNAc(2)Hex(6)	0	721	1.25	95.7	1.9	0.0556636	0.00739827	0.00737554	0.00870196	0.838465	0.0878538	0.087802	0.0943276	High
High	[K].SAEGTFFINK.[T]	1xHexNAc(2)Hex(9) [N9]	1	P06865	P06865 [149-158]	0	2978.19	HexNAc(2)Hex(9)	0	149	7.14	454	234.4	7.17898e-08	1.23511e-08	0	0	8.41648e-06	1.50607e-06	0	0	High
High	[K].SAEGTFFINK.[T]	1xHexNAc(2)Hex(7) [N9]	1	P06865	P06865 [149-158]	0	2654.09	HexNAc(2)Hex(7)	0	149	6.09	307	116.5	8.11922e-07	1.66443e-07	0	0	9.51818e-05	1.99537e-05	0	0	High
High	[K].SAEGTFFINK.[T]	1xHexNAc(2)Hex(6) [N9]	3	P06865	P06865 [149-158]	0	2492.03	HexNAc(2)Hex(6)	0	149	6.09	306.1	119.1	8.11922e-07	1.65641e-07	0	0	9.51818e-05	1.98564e-05	0	0	High
High	[K].SAEGTFFINK.[T]	1xHexNAc(2)Hex(5) [N9]	1	P06865	P06865 [149-158]	0	2329.98	HexNAc(2)Hex(5)	0	149	4.23	203.7	43.3	5.87028e-05	4.34372e-06	0	0	0.00708879	0.0027959	0.00255754	0.00271985	High
High	[K].SCVAVTSAQPQNMSR.[R]	1xHexNAc(2)Hex(6) [N12]; 1xCarbamidomethyl [C2]; 1xOxidation [M13]	1	O15031	O15031 [517-531]	0	3030.23	HexNAc(2)Hex(6)	0	517	7.28	359	243.5	5.23734e-08	8.34135e-09	0	0	6.14016e-06	1.01066e-06	0	0	High
High	[K].SGAAFNQSK.[S]	1xHexNAc(2)Hex(6) [N6]	1	Q9NR11	Q9NR11 [258-266]	0	2287.92	HexNAc(2)Hex(6)	0	258	2	151.1	64.7	0.01001	0.00316056	0.00307692	0.00364166	0.0198481	0.00444774	0.00437956	0.00471698	High
High	[K].SLTTSLHNK.[T]	1xHexNAc(2)Hex(7) [N8]	1	Q92673	Q92673 [1887-1895]	0	2541.07	HexNAc(2)Hex(7)	0	1887	3.04	200.4	40.1	0.000903801	0.00143575	0.00138985	0.00162734	0.00436943	0.00185874	0.00169205	0.00180668	High
High	[K].SLTTSLHNK.[T]	1xHexNAc(3)Hex(6) [N8]	1	Q92673	Q92673 [1887-1895]	0	2582.1	HexNAc(3)Hex(6)	0	1887	2.4	154.8	8	0.00400525	0.0020284	0.00194049	0.00228137	0.019356	0.00444774	0.00440529	0.0047356	High
High	[K].SNVSDAVAQSTR.[I]	1xHexNAc(2)Hex(8) [N2]	1	P60174	P60174 [232-243]	0	2937.18	HexNAc(2)Hex(8)	0	232	1.72	68.1	8.5	0.0190725	0.00632911	0.00629327	0.00742942	0.632226	0.0564867	0.0564166	0.0603622	High
High	[K].SQRPVSNSSSFLGSLFGSK.[R]	1xHexNAc(2)Hex(7) [N7]	1	Q5JU85	Q5JU85 [1184-1202]	0	3525.54	HexNAc(2)Hex(7)	0	1184	1.45	16.3	14	0.0355255	0.00688791	0.0068323	0.00806452	0.0505244	0.00747943	0.00743494	0.00796178	High
High	[K].TANDTSTEAYNLLLR.[T]	1xHexNAc(2)Hex(7) [N3]	1	P11047	P11047 [1203-1217]	0	3222.37	HexNAc(2)Hex(7)	0	1203	6.85	293.8	177.5	1.41874e-07	2.86714e-08	0	0	1.66329e-05	3.47086e-06	0	0	High
High	[K].TANDTSTEAYNLLLR.[T]	1xHexNAc(6)Hex(3) [N3]	1	P11047	P11047 [1203-1217]	0	3386.47	HexNAc(6)Hex(3)	0	1203	1.94	145.5	8.5	0.0115854	0.00369231	0.00368324	0.00436046	0.51635	0.0402976	0.0402726	0.0435949	High
High	[K].TCDWLPKPNMSASCK.[E]	1xHexNAc(2)Hex(3)Fuc(1) [N9]; 2xCarbamidomethyl [C2; C14]; 1xOxidation [M10]	2	P07602	P07602 [93-107]	0	2849.17	HexNAc(2)Hex(3)Fuc(1)	0	93	7.09	442.6	294.3	8.04509e-08	1.51984e-08	0	0	9.43189e-06	1.85608e-06	0	0	High
High	[K].TCDWLPKPNMSASCK.[E]	2xCarbamidomethyl [C2; C14]; 1xHexNAc(2)Hex(4) [N9]; 1xOxidation [M10]	1	P07602	P07602 [93-107]	0	2865.16	HexNAc(2)Hex(4)	0	93	4.67	168.9	123.5	2.14132e-05	1.668e-06	0	0	0.0025057	0.00185874	0.00175747	0.00186916	High
High	[K].TCDWLPKPNMSASCK.[E]	2xCarbamidomethyl [C2; C14]; 1xOxidation [M10]; 1xHexNAc(2)Hex(3) [N9]	1	P07602	P07602 [93-107]	0	2703.11	HexNAc(2)Hex(3)	0	93	6.36	256.1	146.7	4.37103e-07	9.20309e-08	0	0	5.30484e-05	1.12211e-05	0	0	High
High	[K].TCDWLPKPNMSASCK.[E]	2xCarbamidomethyl [C2; C14]; 1xOxidation [M10]; 1xHexNAc(2)Hex(5) [N9]	1	P07602	P07602 [93-107]	0	3027.21	HexNAc(2)Hex(5)	0	93	2.33	94.1	14.7	0.00472154	0.00267738	0.00266134	0.00311526	0.298459	0.0192572	0.0191781	0.0199262	High
High	[K].TLSPTGNISSAPK.[D]	1xHexNAc(2)Hex(5) [N7]	1	O94901	O94901 [726-738]	0	2489.1	HexNAc(2)Hex(5)	0	726	6.19	284.5	111	6.51641e-07	1.36621e-07	0	0	7.63931e-05	1.63293e-05	0	0	High
[truncated: 263 more rows]
