# Supplementary material for: Site-specific characterization and quantitation ofN-glycopeptides in PKM2 knockout breast cancer cells using DiLeu isobaric tags enabled by electron-transfer/higher-energy collision dissociation (EThcD)
Source: Royal Society of Chemistry journal article supplement (doi:10.1039/c8an00216a), 2018-01-01
Supplement: c8an00216a4.xlsx [file c8an00216a4.xlsx]

## Sheet: R1
Confidence	Annotated Sequence	glycosylation site	Positions in Master Proteins	Qvality PEP	Qvality q-value	# PSMs	Abundance Ratio: (117) / (115)	115	117	XCorr Sequest HT	Confidence Sequest HT	Percolator q-Value Sequest HT	Percolator PEP Sequest HT
High	[K].AAIPSALDTNSSK.[S]	[N10]	Q08380 [542-554]	0.00144346	0	1.25	2.8715	103.25	296.75	2.3125	High	0	0.00087612
High	[K].AALSWSNGNGTASCR.[V]	[N9]	Q12913 [223-237]	0.00746264	0.000147799	1.5	0.782779	223.55	176.45	2.0475	High	0.000158425	0.0042363
High	[K].AASMNHTK.[A]	[N5]	Q9UBV2 [213-220]	0.0949513	0.00823665	1	2.06186	37.6	77.5	1.34	High	0.006678	0.07153
High	[K].AATCINPLNGSVCERPANHSAK.[Q]	[N9; N18]	O75882 [906-927]	0.023552	0.000424528	1	0.759494	227.233	172.767	1.23	High	0.000481067	0.0166003
High	[K].ACNNSACDWDGGDCSGNSGGSR.[Y]	[N3]	Q3T906 [455-476]	0.00191613	0.000147799	1.5	0.832813	216.275	183.725	2.275	High	0.000158425	0.00111932
High	[K].AEMNGSK.[L]	[N4]	P16422 [71-77]	0.131956	0.00750666	1	2.27273	122.3	277.7	1.64	High	0.006143	0.1083
High	[K].AFNSTLPTMAQMEK.[A]	[N3]	P16070 [55-68]	0.00910769	0.000318396	1.5	0.995768	199.65	200.35	2.0825	High	0.0003608	0.00581182
High	[K].AGCECLNESDEHGFDNCLR.[K]	[N7]	O43396 [133-151]	0.00558349	0.000591197	1	1.07991	192.3	207.7	1.64	High	0.0006337	0.00323
High	[K].AGFEAVENGTVCR.[G]	[N8]	P29323 [258-270]	0.0556399	0.00311932	1.66667	1.14767	147.133	159.133	1.80333	High	0.002426	0.0431179
High	[K].AGHFQNTSSPSAR.[C]	[N6]	P36941 [172-184]	0.000122312	0	1	0.553403	257.5	142.5	3.13	High	0	5.775e-05
High	[K].AINDTAAR.[L]	[N3]	Q02487 [627-634]	0.119318	0.0065163	1.66667	0.565718	181.667	101.133	2.09667	High	0.00669467	0.116133
High	[K].AINQTAVECTWTGPR.[N]	[N3]	Q92673 [1852-1866]	0.000102365	0	2.25	0.868432	213.025	186.975	3.31	High	0	0.000214727
High	[K].ALMNGSESR.[F]	[N4]	P35613 [265-273]	0.0747883	0.0053156	1.25	1.0238	127.8	132.75	1.4675	High	0.00434625	0.05572
High	[K].ALSPNSTISSAPK.[D]	[N5]	Q9UH99 [632-644]	0.0108935	0.000318396	2.25	1.59681	153.45	246.55	2.3725	High	0.0002916	0.0068725
High	[K].AMSSNETAAYK.[I]	[N5]	Q8TCJ2 [637-647]	0.0102439	7.38996e-05	1.75	1.4202	120.837	168.362	2.37	High	0.0006834	0.0183613
High	[K].ANATIEVK.[A]	[N2]	Q9Y639 [228-235]	0.068648	0.00413981	1	1.41443	165.6	234.4	2.38	High	0.003291	0.05367
High	[K].ANDSDQGANAEIEYTFHQAPEVVR.[R]	[N2]	Q08174 [304-327]	0.00655791	0.000197066	1	1.09489	190.9	209.1	2.75	High	0.0003035	0.00426006
High	[K].ANIQFGDNGTTISAVSNK.[A]	[N8]	Q14108 [98-115]	0.00192063	0	2	1.17199	184.025	215.975	2.295	High	0	0.0012402
High	[K].ANLTWSVK.[H]	[N2]	O00754 [366-373]	0.0553067	0.00423697	1	1.37931	168.1	231.9	1.6	High	0.003287	0.03539
High	[K].ANTTQPGIVEGGQVLK.[C]	[N2]	P06756 [73-88]	0.00609794	0.000147799	2	1.55945	151.825	248.175	2.4075	High	0.000158425	0.00418994
High	[K].APDSNCSNLLITTR.[Q]	[N5]	A2RU67 [392-405]	0.0546512	0.00385338	1.66667	0.7768	223.5	176.5	1.57333	High	0.003087	0.0386542
High	[K].AVLVNNITTGER.[L]	[N6]	Q8NBJ4 [104-115]	0.0528373	0.00272084	3	1.15207	185.45	214.55	1.635	High	0.0033845	0.05672
High	[K].CATVTENATGDLATSR.[N]	[N7]	O43291 [88-103]	8.41583e-05	0	2	1.06101	166.45	173.175	2.53	High	0	3.35365e-05
High	[K].CCGAANYTDWEK.[I]	[N6]	P08962 [145-156]	0.00834536	0.000388173	3	1.31406	125.375	164.475	2.2675	High	0.001086	0.0196352
High	[K].CHAGYIGDNCNCSTDISTCR.[G]	[N11]	P18084 [576-595]	1.45261e-05	0	1.5	1.36612	167.825	232.175	3.6975	High	0	4.0017e-06
High	[K].CHEGNGTFECGACR.[C]	[N5]	P05556 [477-490]	0.00736745	0.000147799	2	0.794597	219.325	180.675	2.89	High	0.000227625	0.00461681
High	[K].CINQSICEK.[C]	[N3]	O75882 [1071-1079]	0.0608805	0.00313277	1	1.53374	157.9	242.1	1.61	High	0.002425	0.04718
High	[K].CLSEGQPPPSYNWTR.[L]	[N12]	Q96NY8 [270-284]	0.0116221	0.000197066	1.33333	0.935162	205.5	194.5	1.85333	High	0.0003035	0.00701167
High	[K].CNASSQFLCSSGR.[C]	[N2]	Q07954 [2904-2916]	0.0446877	0.000591197	1	1.35135	170.2	229.8	1.61	High	0.0009105	0.03121
High	[K].CNMINGTDGDSFHPLITK.[D]	[N5]	Q14108 [245-262]	0.0497592	0.0023655	1	0.690846	236.55	163.45	1.47	High	0.00210075	0.037185
High	[K].CQEAINATCK.[G]	[N6]	P78536 [534-543]	0.000187609	0	2	1.39665	129.833	197.567	2.78	High	0	0.00033518
High	[K].DIGNYSCAAQGTQTGSK.[K]	[N4]	Q9NYQ6 [1573-1589]	0.037723	0.002089	1	1.12824	187.167	212.833	1.28333	High	0.00165923	0.0255787
High	[K].DLDTDFTNNASQPETK.[A]	[N9]	O75976 [1062-1077]	0.0252961	0.00156225	2.6	1.36351	166.36	233.64	2.308	High	0.00122234	0.0176299
High	[K].DMSDGFISNLTIQR.[Q]	[N9]	P13674 [105-118]	0.0231218	0.000793368	2	0.624545	212.8	130.9	1.54667	High	0.00168178	0.029872
High	[K].DSDKEGTSNSTSEDGPGDGFTILSSK.[S]	[N9]	Q9P0M6 [164-189]	0.00293195	0.000591197	1	1.24378	178.2	221.8	2.59	High	0.0006337	0.00159
High	[K].DTGELNVTSILDR.[E]	[N6]	Q14126 [107-119]	0.0113319	0.000442185	1.75	1.23801	177.575	222.425	2.1225	High	0.0004975	0.0112627
High	[K].DVECGEGHFCHDNQTCCR.[D]	[N13]	P28799 [518-535]	0.00204193	0	1.75	1.09111	190.975	209.025	2.8125	High	0	0.00112215
High	[K].DYYPINESLASLPLR.[V]	[N6]	O96005 [290-304]	0.00534657	0.000341193	1	0.856531	208.4	191.6	2.95	High	0.00026635	0.00362254
High	[K].EDALNETR.[E]	[N5]	P10909 [82-89]	0.0725714	0.00366764	1	1.38504	167.25	232.75	1.41	High	0.003093	0.05552
High	[K].EIFVANGTQGK.[L]	[N6]	O95297 [45-55]	0.00551355	0.000636792	1	0.983768	201.25	198.75	1.61	High	0.0005832	0.0034805
High	[K].EINSLNLTESHNSR.[K]	[N6]	P23229 [925-938]	0.0465989	0.00196353	1	0.762583	161.667	124.633	1.29333	High	0.00165467	0.033848
High	[K].ENGMPMDIVNTSGR.[F]	[N10]	Q9Y639 [275-288]	0.0351303	0.00166388	1.66667	0.777269	223.522	176.478	1.57	High	0.00180378	0.0329939
High	[K].ENGTDTVQEEEESPAEGSK.[D]	[N2]	Q9Y4L1 [595-613]	3.72205e-05	0	3.75	2.08768	128.95	271.05	3.1575	High	0	0.000148664
High	[K].ENSSEICSNNGECVCGQCVCR.[K]	[N2]	P05556 [519-539]	0.0053737	0.000196527	1.33333	1.35685	165.978	234.022	3.00778	High	0.000154667	0.00402326
High	[K].ENTSDPSLVIAFGR.[G]	[N2]	P11279 [83-96]	0.0241884	0.00160939	1.66667	1.01044	197.267	202.733	2.10667	High	0.00139917	0.0154258
High	[K].EPGSNVTMSVDAECVPMVR.[D]	[N5]	Q08380 [188-206]	0.0397997	0.00224078	1	0.74813	228.067	171.933	1.79	High	0.00172533	0.0257569
High	[K].EQYIHENYSR.[A]	[N7]	O60568 [542-551]	0.00146374	0	3.75	0.88476	164.15	145.05	2.515	High	0	0.000831295
High	[K].ETNFSLASGLEAK.[D]	[N3]	P56159 [57-69]	0.00859616	0.000147799	1.5	0.818331	219.475	180.525	1.9075	High	0.000227625	0.0053905
High	[K].EVEVNSSK.[C]	[N5]	P18564 [459-466]	0.0621796	0.00317909	1	3.11526	65.65	201.6	1.565	High	0.00243835	0.04335
High	[K].FITNTETPLNNGSTPR.[I]	[N11]	Q96GX1 [362-377]	0.0076453	0.000197066	2.33333	1.01078	197.033	202.967	2.07667	High	0.0003035	0.00941767
High	[K].FLSSSPHLPPSSYFNASGR.[A]	[N15]	O14773 [429-447]	0.00637708	0.000424528	1.66667	0.919681	207.067	192.933	1.88	High	0.0022589	0.035349
High	[K].FNSSSSSLEEK.[I]	[N2]	Q9H173 [192-202]	0.0180513	0.000295599	1.5	1.63934	150.3	249.7	2.43	High	0.00045525	0.0123379
High	[K].FNSTQIAAMAPEHEEPR.[I]	[N2]	Q4G148 [236-252]	0.019443	0.00111918	1.16667	0.821243	219.433	180.567	2.01	High	0.000981533	0.0144807
High	[K].FPDEEGACQPCPINCTHSCVDLDDK.[G]	[N14]	P04626 [616-640]	0.00052939	0	2	1.55521	39.75	61.35	2.225	High	0	0.0002624
High	[K].FVGTPEVNQTTLYQR.[Y]	[N8]	P01033 [46-60]	0.00172629	0	2	0.754859	227.575	172.425	2.475	High	0	0.00107459
High	[K].FVNSTGYLTEAEK.[F]	[N3]	Q8NBK3 [139-151]	0.053297	0.00423697	1	1.49701	160.2	239.8	1.63	High	0.003287	0.0338
High	[K].GLNLTEDTYKPR.[I]	[N3]	Q08380 [396-407]	0.103363	0.0065751	1	3.31126	92.8	307.2	1.2	High	0.005118	0.08311
High	[K].GNPYSDLGNHTTCR.[Y]	[N9]	Q4KMQ2 [794-807]	0.000697327	0	1.33333	0.823723	218.867	181.133	2.52667	High	0	0.000294157
High	[K].GNSTHGCSSEETFLIDCR.[G]	[N2]	Q03405 [221-238]	0.00226156	0	1	1.54261	156.825	243.175	2.4675	High	0	0.00115724
High	[K].GPTNNTCVVR.[T]	[N4]	Q8TEM1 [1438-1447]	0.161634	0.00780528	1	0.779423	224.8	175.2	0.9	High	0.006066	0.135
High	[K].GQTEIQVNCPPAVTENK.[T]	[N16]	Q16563 [56-72]	0.0033699	8.44567e-05	1.57143	1.3947	162.7	237.3	2.48143	High	9.05286e-05	0.00222235
High	[K].GSLSYLNVTR.[K]	[N7]	P07339 [257-266]	0.0360178	0.000682386	1	1.16144	185.1	214.9	1.77	High	0.0005327	0.02675
High	[K].GSQWSDIEEFCNR.[S]	[N12]	P08174 [84-96]	0.000841898	0	2	0.848716	216.325	183.675	2.485	High	0	0.000440358
High	[K].GSTLSQWSLGNGTPVTSK.[G]	[N11]	Q7Z2K6 [809-826]	0.0586126	0.00350401	1	0.991408	198.733	201.267	1.51667	High	0.0027509	0.0422393
High	[K].GTNFTHLVADR.[V]	[N3]	Q9C0C4 [417-427]	2.00205e-05	0	1	0.349406	255.325	90.975	3.3525	High	0	6.7975e-06
High	[K].GVAVTNTSK.[L]	[N6]	Q99571 [70-78]	0.0700955	0.00335923	1	1.78094	143.8	256.2	1.53	High	0.002811	0.05251
High	[K].GVLMVGNETTYEDGHGSR.[K]	[N7]	Q8IWA5 [181-198]	0.0100481	0.00044519	1.14286	0.624331	244.743	155.257	2.39714	High	0.000374814	0.00734544
High	[K].GVVDSDDLPLNVSR.[E]	[N11]	P14625 [435-448]	0.000896656	0	1	0.888099	211.8	188.2	2.92	High	0	0.000435
High	[K].HLLENSTASVSEAER.[K]	[N5]	P42892 [162-176]	0.000165826	0	2	0.780945	224.35	175.65	3.19	High	0	7.3495e-05
High	[K].HLNASNPTEPATIIFTAAR.[E]	[N3]	Q8NFQ8 [284-302]	0.0066562	0.000197066	1.33333	0.568505	254.4	145.6	1.91333	High	0.0003035	0.005742
High	[K].HLNSSHPR.[S]	[N3]	Q5JTV8 [397-404]	0.0675411	0.00385477	1	0.621311	246.6	153.4	1.61	High	0.003018	0.050075
High	[K].HLTNDTTTPESTMTSGQAR.[A]	[N4]	Q9NWD8 [77-95]	0.00286344	0	1.25	0.715052	233.25	166.75	1.9025	High	0	0.00433108
High	[K].HMLALAPNSTAR.[R]	[N8]	Q92508 [2324-2335]	0.00478011	0.000159198	1.375	0.794123	219.05	180.95	2.585	High	0.0001458	0.00291925
High	[K].HNNDTQHIWESDSNEFSVIADPR.[G]	[N3]	P14625 [215-237]	0.0190893	0.00147131	3.5	0.51164	261.217	138.783	2.34	High	0.00121862	0.0140436
High	[K].HNQSEYEDSAGECCSCPK.[T]	[N2]	P06213 [697-714]	0.0490422	0.00328755	1	2.41838	116.9	283.1	1.84	High	0.002559	0.0393038
High	[K].HTNMNLTQLK.[V]	[N5]	Q15165 [250-259]	0.0231786	0.0010421	1.625	1.10681	164.512	189.562	2.32625	High	0.000888575	0.0153804
High	[K].IDAYNEAAVSILNSSTR.[N]	[N13]	Q96PB1 [229-245]	0.0364083	0.00239832	1	0.446828	271.6	128.4	1.655	High	0.001881	0.0279883
High	[K].IDSTGNVTNELR.[V]	[N6]	O75882 [411-422]	0.0351796	0.00146204	1.25	0.891464	142.125	116.2	2.0925	High	0.00123567	0.0276525
High	[K].IGYSNNGSDWK.[M]	[N6]	O14786 [517-527]	0.0480706	0.00186198	1.5	1.99402	133.6	266.4	1.97	High	0.00166775	0.03587
High	[K].IHVAGETDSSNLNVSEPR.[A]	[N13]	Q12913 [401-418]	0.00547658	0	1	1.1564	184.575	215.425	2.485	High	0	0.00324875
High	[K].ILLTCSLNDSATEVTGHR.[W]	[N8]	P35613 [153-170]	3.6667e-07	0	1	0.738552	230.1	169.9	3.68	High	0	1.133e-07
High	[K].INATDADEPNTLNSK.[I]	[N2]	Q14126 [181-195]	0.0230534	0.00132841	1.5	1.26877	143.45	199.4	2.10667	High	0.00112303	0.0155494
High	[K].INYTVPQSGTFK.[I]	[N2]	Q6YHK3 [418-429]	0.109229	0.00568511	1	0.928505	207.4	192.6	1.16	High	0.004797	0.08846
High	[K].IQQESLGSAPLMGDDHPNASR.[D]	[N18]	Q5JRA6 [572-592]	0.0233518	0.00121252	1	1.14174	185.886	214.114	2.57	High	0.000942671	0.0192844
High	[K].ISSLQTTEKNDTVAGQGER.[D]	[N10]	P06756 [865-883]	0.01744	0.000147799	1.75	1.87793	114.225	210.525	2.1125	High	0.00121862	0.0209402
High	[K].ITPNNNGTYACFVSNLATGR.[N]	[N6]	P06731 [645-664]	0.0676013	0.00297349	2.4	0.527816	259.2	140.8	1.662	High	0.0023901	0.0515256
High	[K].KEDALNETR.[E]	[N6]	P10909 [81-89]	0.0549019	0.00320973	1	1.28866	126.367	174.667	2.59667	High	0.0025974	0.03872
High	[K].KGTNFTHLVADR.[V]	[N4]	Q9C0C4 [416-427]	0.00558529	0	1	1.09051	191.4	208.6	1.59	High	0	0.003556
High	[K].KPNNLNDTIK.[E]	[N6]	Q11201 [109-118]	0.00182634	0	1	1.78253	32.8	58.5	2.13	High	0	0.001064
High	[K].LANNTHQHVFDDLR.[G]	[N3]	Q99523 [96-109]	0.00250039	0.000113731	4.33333	0.710648	178.317	126.517	2.92833	High	8.87833e-05	0.0013924
High	[K].LEGMNETVSNLTQR.[V]	[N5; N10]	O75071 [292-305]	0.0575047	0.00228351	1	0.738552	230	170	1.17	High	0.002185	0.04119
High	[K].LENLSSSEMGYTATLTR.[T]	[N3]	P10253 [138-154]	0.00485028	7.38996e-05	1.75	1.08035	173.337	196.138	2.325	High	0.000113812	0.00299359
High	[K].LEWLGNCSGLNDETYGYK.[E]	[N6]	P05026 [153-170]	0.000967936	0.000197066	1	1.60171	149.367	250.633	3.18	High	0.000211233	0.000496957
High	[K].LGDCISEDSYPDGNITWYR.[N]	[N14]	Q13740 [154-172]	0.0129255	0.000908234	1.5	0.873744	213.1	186.9	1.9225	High	0.000748425	0.0080129
High	[K].LGVIEDHSNR.[T]	[N9]	P14625 [494-503]	0.000347558	0	1	0.897263	134.625	122.375	2.4625	High	0	0.00015938
High	[K].LLPAFNTTSGLPYPR.[I]	[N6]	Q9BZQ6 [190-204]	0.0220715	0.000861307	2.25	0.834028	217.025	182.975	1.59	High	0.000713925	0.0152437
High	[K].LNITCESSK.[K]	[N2]	Q4KMQ2 [360-368]	0.00137693	0	1	1.62866	152.2	247.8	2.44	High	0	0.0006961
High	[K].LNLQTSTSIPNVTEMK.[T]	[N11]	P17301 [95-110]	0.00710154	0.000591197	1	0.924214	207.9	192.1	2.01	High	0.0006337	0.004203
High	[K].LNQTEPVAGNYYPVNTR.[I]	[N2]	O00754 [765-781]	0.0244402	0.00111082	1	1.34078	170.55	229.45	2.31833	High	0.000941667	0.018911
High	[K].LPENQTSPGESPER.[G]	[N4]	Q12770 [587-600]	0.0241101	0.00138487	2	1.13938	154.333	174.133	2.08333	High	0.001091	0.0180897
High	[K].LQFDDNGTYTCQVK.[N]	[N6]	O60487 [113-126]	0.0301314	0.00179157	1	1.41693	164.2	235.8	1.745	High	0.00143793	0.0228483
High	[K].LQGLENWGQDPGVSANASK.[A]	[N16]	Q96AQ6 [440-458]	0.0260008	0.00172321	1	1.40056	164.833	235.167	1.66	High	0.00132133	0.0173173
High	[K].LQNNISYQMADIHHLK.[E]	[N4]	Q6P4E1 [112-127]	0.0211489	0.00103495	1.75	0.844238	214.125	185.875	2.105	High	0.00082275	0.0158387
High	[K].LSDTTSQSNSTAK.[E]	[N9]	P07942 [1271-1283]	0.000289288	0	2	4.0201	69.525	274.475	2.5025	High	0.0003608	0.0032127
High	[K].LTSCATNASICGDEAR.[C]	[N7]	Q07954 [3782-3797]	0.00166135	0	2	1.27024	175.825	224.175	2.66	High	0	0.000808954
High	[K].LVANESVPFETSCR.[Y]	[N4]	Q9NXG6 [345-358]	0.0017318	0	2.25	1.10011	190.175	209.825	2.99	High	0	0.000854802
High	[K].LVGGPVAGGDPNQTIR.[G]	[N12]	O15230 [84-99]	0.000126275	0	2.25	1.1354	186.85	213.15	3.19	High	0	4.64675e-05
High	[K].MNFTGGDTCHK.[V]	[N2]	P11717 [1311-1321]	0.00115939	0	1.33333	1.44648	82.2	122.8	2.25333	High	0	0.0005523
High	[K].MSVCTDNVTDLR.[I]	[N7]	Q6UXG2 [711-722]	0.0310072	0.00155453	1.42857	1.56705	124.514	190.743	1.78429	High	0.00123499	0.02365
High	[K].MVLWNDSVVR.[H]	[N5]	Q9Y487 [501-510]	0.0358921	0.00158704	1	1.01859	197.2	202.8	1.5975	High	0.00148855	0.0269402
High	[K].MYSEGSDIVPQSNETALHYFK.[K]	[N13]	Q9UBV2 [419-439]	0.0164452	0	1	1.27065	176.2	223.8	1.96	High	0	0.008971
High	[K].NANGSYTCEECDSSCVGCTGEGPGNCK.[E]	[N3]	Q6UXH1 [249-275]	0.00538492	0	1.83333	3.09598	96.15	303.85	2.24167	High	0	0.0029615
High	[K].NATLAEQAK.[L]	[N1]	Q9Y4L1 [869-877]	0.0136526	0.000551531	1.5	1.71453	135	265	2.1175	High	0.0004749	0.0101895
High	[K].NATYGYVLDDPDPDDGFNYK.[Q]	[N1]	O43852 [131-150]	0.032864	0.00139941	1.5	1.20846	179.4	220.6	2.19167	High	0.00111662	0.0266079
High	[K].NCTQSLQCWK.[Y]	[N1]	P46531 [1489-1498]	0.0579992	0.00423697	1	0.983284	201.7	198.3	1.42	High	0.003287	0.0372
High	[K].NELMLNSSLMR.[I]	[N6]	O00468 [130-140]	0.0644676	0.0030832	1.33333	1.14943	140.033	163.967	1.52667	High	0.00264073	0.05747
High	[K].NESLETYPVMK.[Y]	[N1]	P05026 [193-203]	0.0301685	0.00172321	1.33333	0.970246	145.167	150.867	2.12333	High	0.00132133	0.0197824
High	[K].NETIWYLK.[Y]	[N1]	O15342 [70-77]	0.0755065	0.00375333	1	2.21239	123.75	276.25	2.185	High	0.0030715	0.0628063
High	[K].NGDAYGFYNNSVK.[T]	[N9]	Q6P4A8 [63-75]	0.0160114	0.000254717	1.8	1.62338	151.9	248.1	2.166	High	0.0014107	0.0295889
High	[K].NGSGAVFPVAGADVQTLR.[E]	[N1]	O00391 [130-147]	0.0335181	0.00246766	1	0.747105	228.25	171.75	1.895	High	0.0019115	0.0218765
High	[K].NGSTEIYGECGVCPR.[G]	[N1]	Q9P055 [37-51]	0.0401866	0.0023224	1.5	0.730327	230.175	169.825	1.675	High	0.002634	0.0380665
High	[K].NGVNGTGENGR.[K]	[N4]	P05556 [403-413]	0.0540434	0.00214909	2	1.34078	143.05	209.683	1.79167	High	0.0028832	0.0505383
High	[K].NGVNGTGENGRK.[C]	[N4]	P05556 [403-414]	0.0126109	0.000447539	1.57143	1.79166	72.1286	131.757	2.16286	High	0.000519571	0.0103876
High	[K].NITIVTGAPR.[H]	[N1]	P26006 [265-274]	0.080138	0.00572437	1	1.05152	194.767	205.233	1.64	High	0.004577	0.0618233
High	[K].NLNNSQSDVVSFR.[L]	[N3]	P08648 [771-783]	0.0281886	0.000956618	1.5	1.35823	139.1	190.275	1.9025	High	0.00075	0.0216089
High	[K].NLTFEGPLPEK.[I]	[N1]	Q9HAT2 [401-411]	0.028767	0.00184424	1.66667	1.49402	159.733	240.267	2.36333	High	0.00144833	0.0225944
High	[K].NMSFVNDLTVTQDGR.[K]	[N1]	Q9HDC9 [196-210]	0.0224508	0.00122987	2	0.782473	204.664	159.036	2.15273	High	0.00104029	0.0157756
High	[K].NMTFDLPSDATVVLNR.[S]	[N1; N15]	P11279 [62-77]	0.00101922	0	2	0.944622	203.925	196.075	2.16	High	0	0.000569849
High	[K].NNHTASILDR.[M]	[N2]	P08962 [129-138]	0.0103501	0.000318396	2.5	1.03426	170.362	176.5	2.70625	High	0.0004777	0.00846783
High	[K].NNTTFLECAPK.[S]	[N1]	Q99985 [585-595]	0.0195704	0.000698858	6	0.652997	239.42	160.58	2.366	High	0.00054344	0.0150965
High	[K].NNTYLVK.[R]	[N1]	Q6P4E1 [150-156]	0.0431315	0.000591197	1	1.5674	155.8	244.2	1.8	High	0.0009105	0.03012
High	[K].NPVGLIGAENATGETDPSHSK.[F]	[N10]	P43251 [340-360]	0.000645217	0	1	1.02987	196.2	203.8	2.2	High	0	0.000326
High	[K].NQSVPLSCCR.[E]	[N1]	O60637 [167-176]	0.0590758	0.00256175	1	0.834725	218	182	1.48	High	0.001984	0.04562
High	[K].NSSQVLGEK.[V]	[N1]	Q9Y653 [303-311]	0.0040456	0.000591197	1	1.41643	165.6	234.4	1.88	High	0.0006337	0.002264
High	[K].NSTCLDDSWIHPR.[N]	[N1]	Q96F46 [54-66]	0.00741597	0.000227462	1.33333	0.792812	222.433	177.567	2.25667	High	0.000177567	0.0051125
High	[K].NTNSSNNFSR.[S]	[N3]	Q9H0X4 [114-123]	0.203402	0.00945827	1	0.74239	229.5	170.5	0.76	High	0.007342	0.1734
High	[K].NTSHGSTSQCK.[F]	[N1]	O75072 [92-102]	0.0165239	0.000318396	1	0.821524	176.55	146.375	1.635	High	0.0003608	0.0105635
High	[K].NTSVEHTR.[L]	[N1]	Q96JJ7 [258-265]	0.0335067	0.00124822	1.5	0.638468	243.65	156.35	1.55	High	0.00228568	0.0306725
High	[K].NTTSVWYTSK.[G]	[N1]	P04066 [382-391]	0.0168232	0.000295599	1.5	1.06553	193.45	206.55	2.145	High	0.00045525	0.0114786
High	[K].NVDMAGFIANNGTR.[E]	[N11]	Q9NYQ6 [1630-1643]	0.0759187	0.0058753	2.66667	0.975293	201.167	198.833	1.59	High	0.00462967	0.0561267
High	[K].NVSCLWCNTNK.[A]	[N1]	P53801 [54-64]	0.0641831	0.00269929	1.66667	0.933416	206.767	193.233	1.71	High	0.00235117	0.050564
High	[K].NVSVAEGK.[E]	[N1]	Q9P2B2 [286-293]	0.0104076	0.000505935	1	1.97368	69.3667	126.6	2.25333	High	0.0004592	0.00597367
High	[K].NWQLTEEDFGNTSGR.[L]	[N11]	P30825 [216-230]	0.0161175	0.000535972	1.75	0.75959	226.75	173.25	1.825	High	0.00114942	0.0186013
High	[K].NYSVLYFQQK.[V]	[N1]	P42785 [47-56]	0.0233455	0.00119416	1.66667	0.974659	151.967	140.833	1.93	High	0.00117547	0.0148627
High	[K].QCNGTSMCWCVNTAGVR.[R]	[N3]	P16422 [109-125]	0.0273878	0.00122556	1	0.540394	259.7	140.3	1.615	High	0.00096235	0.020109
High	[K].QDNETGIYYETWNVK.[A]	[N3]	O75503 [201-215]	0.0417206	0.00130134	1	0.541712	259.5	140.5	1.4	High	0.00101	0.03128
High	[K].QDQQLQNCTEPGEQPSPK.[Q]	[N7]	O00584 [206-223]	0.0065807	0.000147799	1	1.00351	199.375	200.625	2.0675	High	0.000158425	0.00368363
High	[K].QLSCVANQNGSQADCELGNPFK.[R]	[N9]	P23229 [762-783]	0.00374984	0	1.33333	1.1655	183.8	216.2	2.81667	High	0	0.00194334
High	[K].QLVHSFAEGQDQGSAYANR.[T]	[N18]	Q5ZPR3 [74-92]	2.73228e-07	0	2.75	0.617951	245.8	154.2	3.7175	High	0	4.85534e-07
High	[K].QNNGAFNETLFR.[N]	[N7]	P02786 [721-732]	0.0150968	0.000822977	1.71429	0.637697	238.729	161.271	2.49143	High	0.000656814	0.0100835
High	[K].QPVSPVIHPPVSYNDTAPR.[I]	[N14]	Q15904 [248-266]	4.67682e-05	0	2	0.786164	223.475	176.525	2.63	High	0	2.07332e-05
High	[K].QSGDVTCNCTDGR.[V]	[N8]	Q07954 [4357-4369]	0.0494389	0.00269929	1.33333	1.82482	140	260	1.61	High	0.00235117	0.0398273
High	[K].QYLSYETLYANGSR.[T]	[N11]	O95084 [83-96]	0.0736962	0.00330629	1	0.95816	202.567	197.433	1.53333	High	0.00280617	0.0586433
High	[K].RGPECSQNYTTPSGVIK.[S]	[N8]	O14786 [143-159]	0.00274286	0	1	0.912825	208.65	191.35	2.675	High	0	0.00129827
High	[K].RNDAGSYECEIQNPASANR.[S]	[N18]	P40199 [207-225]	0.0153759	0.000682386	1	0.734754	230.6	169.4	1.53	High	0.0005327	0.0107
High	[K].RQNITNQLEK.[W]	[N3]	Q68CQ7 [255-264]	0.00610904	0.000170596	1.25	0.910125	209.25	190.75	3.0425	High	0.000133175	0.0039038
High	[K].RQNQSLVYGK.[V]	[N3]	Q09328 [445-454]	0.00606801	0.000147799	1.25	0.639693	206.375	130.15	2.8675	High	0.000227625	0.00362625
High	[K].SCGECIQAGPNCGWCTNSTFLQEGMPTSAR.[C]	[N17]	P05556 [34-63]	0.000663776	0	1.90909	0.870047	211.873	188.127	3.31455	High	0	0.000415141
High	[K].SCVAVTSAQPQNMSR.[R]	[N12]	O15031 [517-531]	0.00462202	9.74837e-05	1.71429	0.875985	211.657	188.343	2.39714	High	0.000166629	0.0033043
High	[K].SDAVSHTGNYTCEVTELTR.[E]	[N9]	Q08722 [103-121]	3.25015e-06	0	3	0.819001	183.5	156.15	3.095	High	0	1.11433e-06
High	[K].SDPHWESMLNATTR.[R]	[N10]	Q9H0X4 [305-318]	0.005562	0.000197066	1.33333	0.793651	222.267	177.733	1.89333	High	0.000211233	0.00345323
High	[K].SELVNETR.[W]	[N5]	Q9UGT4 [158-165]	0.108944	0.00753833	1	1.39795	129.333	174.933	1.32	High	0.00591067	0.0832033
High	[K].SHTNTSHVMQYGNK.[T]	[N4; N13]	Q99538 [260-273]	0.0108264	0	1	0.850822	159.4	137.6	2.56	High	0	0.00734267
High	[K].SLTTSLHNK.[T]	[N8]	Q92673 [1887-1895]	0.012507	0.000197066	1.66667	1.25945	57.9667	72.7667	1.79667	High	0.0003035	0.00745233
High	[K].SLVTQYLNATGNR.[W]	[N8]	P08195 [417-429]	0.0295516	0.00161957	2.8	0.469043	216.82	118.72	2.628	High	0.00135534	0.0237266
High	[K].SNDTAASEYK.[Y]	[N2]	Q12913 [141-150]	0.000603507	0	1	1.92123	86.1	157.75	2.63	High	0	0.0003221
High	[K].SNVSGNTHLCISNGNYEK.[E]	[N2]	P56159 [405-422]	0.0339733	0.000591197	1	0.626959	65.1	40.8	0.64	High	0.0009105	0.02316
High	[K].SPANGSLGPTLNLSSGESR.[L]	[N4; N12]	Q9BZC7 [1546-1564]	0.000694206	0	1.5	0.758869	225.95	174.05	1.8925	High	0	0.000358892
High	[K].STGCAAPMVYLDCSNSSAGTPGAECLR.[S]	[N15]	Q9HC84 [791-817]	0.00936297	0.000591197	1	0.569801	254.8	145.2	1.64	High	0.0006337	0.005683
High	[K].TANDTSTEAYNLLLR.[T]	[N3]	P11047 [1203-1217]	0.00250238	0	1.5	1.20846	176.9	223.1	2.0275	High	0	0.00136167
High	[K].TAVNCSSDFDACLITK.[A]	[N4]	P13987 [40-55]	0.00590011	0.000147799	2.25	1.01885	198.075	201.925	1.405	High	0.000158425	0.003529
High	[K].TCNPETFPSSNESR.[Q]	[N11]	Q8IWA5 [407-420]	0.0188506	0.000874771	2.83333	1.2487	153.067	194.183	2.52	High	0.000822417	0.0145391
High	[K].TCPAGVMGENNTLVWK.[Y]	[N10]	P00533 [594-609]	0.0794545	0.00504476	1.66667	0.790097	223.267	176.733	1.46	High	0.00429233	0.0602367
High	[K].TFKNESENTCQDVDECQQNPR.[L]	[N4]	P48960 [105-125]	0.00361851	0.000295599	1.5	1.72117	146.45	253.55	2.03	High	0.00031685	0.00215345
High	[K].THEAEIVEGENHTYCIR.[F]	[N11]	P21333 [2185-2201]	0.0452666	0.00258482	1	1.19474	177.35	222.65	1.845	High	0.001982	0.0309015
High	[K].TLETHSNK.[T]	[N7]	Q92673 [1602-1609]	0.0889024	0.00740486	1	2.32829	71.65	172.05	1.65	High	0.005833	0.06391
High	[K].TLSPTGNISSAPK.[D]	[N7]	O94901 [726-738]	0.00311789	0.000147799	1.5	0.963855	164.875	157.125	2.3425	High	0.000158425	0.00189579
High	[K].TMFNSTDIK.[L]	[N4]	Q96K49 [65-73]	0.0386828	0.00186198	1	1.16009	48.8	56.95	1.62	High	0.00166775	0.028978
High	[K].TNNSTCQPCPYGSYSNGSDCTR.[C]	[N3; N16]	Q6UXG2 [389-410]	3.29064e-05	0	2	1.06496	192.55	207.45	3.47	High	0	9.89119e-06
High	[K].TPMTNSSIQFLDNAFR.[K]	[N5]	P15586 [275-290]	0.0591081	0.00295427	1.4	0.695604	230.08	169.92	1.472	High	0.00240244	0.045642
High	[K].TSNSSQVSNEQDK.[I]	[N3]	Q5JRA6 [248-260]	0.044035	0.00155269	1	2.13675	127.4	272.6	1.38	High	0.001212	0.0272
High	[K].TVTSASNNETYCR.[S]	[N8]	P25106 [185-197]	0.0127499	0.000424528	2	0.582524	252.367	147.633	1.65333	High	0.0003888	0.00876067
High	[K].TVTTSGTTNNTVTPTSQPVR.[K]	[N9]	Q04900 [138-157]	0.00771714	0	2	0.74239	229.267	170.733	2.48333	High	0	0.00539875
High	[K].TVVTYHIPQNSSLENVDSR.[Y]	[N10]	O75144 [61-79]	0.015007	0.000942091	1.33333	0.60778	248.367	151.633	2.07667	High	0.0007928	0.009062
High	[K].TYNASVLPVR.[V]	[N3]	Q96S52 [368-377]	0.0826339	0.00395331	1	0.473821	271.3	128.7	2.11	High	0.00306935	0.06626
High	[K].TYNGTNPDAASR.[A]	[N3]	O60637 [125-136]	0.0205559	0.000295599	1	1.93424	136.3	263.7	1.465	High	0.00045525	0.0126515
High	[K].VASVININPNTTHSTGSCR.[S]	[N10]	P13473 [248-266]	7.81643e-07	0	4.2	0.553894	214.34	124.68	3.694	High	0	3.4351e-07
High	[K].VCNEDQTNCTVPTYPSCR.[D]	[N8]	Q9HBA0 [644-661]	0.0239335	0.000844912	1	0.772798	225.633	174.367	1.45667	High	0.0007129	0.0170917
High	[K].VDCTANTNTCNK.[Y]	[N8]	P30101 [83-94]	0.00422957	0.000147799	2	2.14362	126.825	273.175	2.32	High	0.0003608	0.00565872
High	[K].VEAEALNATAIR.[V]	[N7]	Q13332 [727-738]	0.0371311	0.000682386	1	1.0917	191.3	208.7	1.95	High	0.0005327	0.02767
High	[K].VIDGTPCDQNGTAICVSGQCK.[S]	[N10]	Q6ZMP0 [364-384]	0.00278337	0	1	0.696541	234.1	165.9	2.27	High	0	0.00138591
High	[K].VIEEFYNQTWVHR.[Y]	[N7]	P11166 [39-51]	0.000740307	0	1	0.569638	253.925	146.075	2.325	High	0	0.000331125
High	[K].VLGQSQEPNVNPASAGNQTQK.[T]	[N17]	Q5VW38 [153-173]	0.00534978	0.000231652	1	1.1274	186.825	213.175	2.52	High	0.000185975	0.00298246
High	[K].VNDSVPFHLGWNSTER.[S]	[N2; N12]	Q6NSJ0 [239-254]	0.0140213	0	1.5	0.772499	225.45	174.55	1.89	High	0	0.0100623
High	[K].VNNTAVIEK.[Q]	[N2]	Q9H330 [550-558]	0.00559086	0.000147799	1	2.10305	79.225	167.925	1.785	High	0.000227625	0.00331557
High	[K].VNVTVEDER.[T]	[N2]	P13726 [155-163]	0.0758432	0.00413981	1	1.73611	146.2	253.8	1.73	High	0.003291	0.05973
High	[K].VPGNQTSTTLK.[L]	[N4]	P32004 [668-678]	0.0202085	0.00107194	1	2.78164	105.25	294.75	1.73	High	0.00106125	0.0120505
High	[K].VSCPIMPCSNATVPDGECCPR.[C]	[N10]	P07996 [351-371]	0.158209	0.00797602	1	1.23457	179	221	1.43	High	0.006479	0.1322
High	[K].VSDNESSSNYTYK.[I]	[N4; N9]	Q12913 [388-400]	0.0261325	0.000949678	1.5	1.74902	143.85	256.15	1.41	High	0.0008583	0.0182435
High	[K].VVDDVSNQTSCR.[L]	[N7]	O75462 [286-297]	0.0165024	0.000227462	1.33333	1.24018	174.6	225.4	1.87	High	0.000177567	0.011401
High	[K].VVNSTTGPGEHLR.[N]	[N3]	P07996 [1065-1077]	1.22292e-06	0	1	0.536769	259.85	140.15	3.74	High	0	4.037e-07
High	[K].VVTQNSSSGNVTHEK.[I]	[N5; N10]	P43007 [197-211]	0.0169975	0.000352489	1	0.973552	201.183	198.817	1.69667	High	0.0004257	0.011678
High	[K].VYYNCSCIER.[K]	[N4]	Q6ZQN7 [541-550]	0.0385777	0.000591197	1	1.39276	167.2	232.8	1.5	High	0.0009105	0.02659
High	[K].WGHNITEFQQR.[F]	[N4]	Q96HE7 [277-287]	0.0363181	0.0013789	1	0.783085	223.45	176.55	2.235	High	0.0012695	0.0262502
High	[K].WTGHNVTVVQR.[T]	[N5]	Q07954 [1507-1517]	0.000468132	0	1	1.09569	190.2	209.8	3.48	High	0	0.000260272
High	[K].YAESDPTVPCNETR.[W]	[N11]	Q14703 [138-151]	0.0335478	0.00122556	1	1.19261	182.45	217.55	1.53	High	0.00096235	0.024735
High	[K].YHVLHINTTK.[N]	[N7]	Q7LGA3 [102-111]	0.0209095	0.000714629	1.66667	0.887049	164.333	146.033	1.5	High	0.0007075	0.01315
High	[K].YIHQNYTK.[A]	[N5]	Q02809 [534-541]	0.0558251	0.00248438	1	1.50376	83.9333	130.3	2.40333	High	0.00204967	0.0389033
High	[K].YPDVQNECRPCHENCTQGCK.[G]	[N6; N14]	P21860 [603-622]	0.16901	0.00891255	2	1.03093	197	203	0.74	High	0.007189	0.1418
High	[K].YRPENSVANDTGFTVVAPGK.[E]	[N9]	O60911 [213-232]	0.000879853	0	1	0.737101	229.6	170.4	3.29333	High	0	0.000534388
High	[K].YSVANDTGFVDIPK.[Q]	[N5]	P07711 [217-230]	0.0430271	0.00244826	2	0.923361	207.533	192.467	1.81	High	0.00258383	0.0496513
High	[K].YTGNASALFILPDQDK.[M]	[N4]	P01011 [268-283]	0.021964	0.00153098	1.25	1.41393	164.5	235.5	1.93	High	0.00124467	0.0171109
High	[K].YVINGTYANETK.[L]	[N4; N9]	Q6PCB8 [210-221]	0.0303656	0.00203195	1	1.23191	179.2	220.8	1.6125	High	0.0015825	0.0229059
High	[R].AACAVKPQEVQMVNGTITNPINGK.[S]	[N14]	P11717 [2123-2146]	0.00884414	0.000318396	1.25	1.0644	192.45	207.55	2.0775	High	0.0002916	0.00576725
High	[R].AAGNTSESQSCAR.[S]	[N4]	Q86WC4 [132-144]	0.00268758	0.000147799	1.75	0.920175	110.875	107.15	2.59	High	0.0002916	0.0037011
High	[R].AASNFTEIK.[N]	[N4]	Q92673 [1703-1711]	0.00667853	0.000591197	2	1.7331	51	88.4	2.22	High	0.0009105	0.02251
High	[R].ACTENNECCHPECLGSCSAPDNDTACVACR.[H]	[N22]	P08069 [223-252]	0.0437468	0.0033263	1	0.674006	238.7	161.3	2.58667	High	0.00252267	0.0313632
High	[R].AEPPLNASASDQGEK.[V]	[N6]	Q9Y4L1 [926-940]	5.21708e-05	0	4.5	1.628	106.225	162.275	3.16	High	0	0.000281257
High	[R].AGPNGTLFVADAYK.[G]	[N4]	Q9HDC9 [157-170]	2.01853e-05	0	3.75	1.7094	100.675	166.275	3.4	High	0	8.731e-06
High	[R].ALDPAGNESAYPPNGVECYSCVGLSR.[E]	[N7]	O95274 [123-148]	0.000117088	0	1.5	0.733878	230.325	169.675	3.26875	High	0	5.7694e-05
High	[R].ALGFENATQALGR.[A]	[N6]	Q08380 [64-76]	0.00876275	0.000147799	1.75	0.945403	163.975	157.35	2.305	High	0.000227625	0.00646684
High	[R].ALPGGADNASVASGAAASPGPQR.[S]	[N8]	O95502 [35-57]	0.000106212	0	1	0.731886	230.033	169.967	2.40333	High	0	3.53697e-05
High	[R].ALQWNAGSGGLPENETTFAR.[I]	[N14]	P51689 [115-134]	0.0275605	0.00172321	1.66667	0.469778	271.067	128.933	1.38667	High	0.00292933	0.0387537
High	[R].ANHSGAVVLLK.[R]	[N2]	P23229 [322-332]	0.00831416	0.000318396	1.25	1.08992	154.7	170.8	2.86	High	0.0002916	0.00564575
High	[R].ANQSWEDSNTDLVPAPAVR.[I]	[N2]	Q99988 [69-87]	0.000777604	0	1	0.813008	220.7	179.3	2.16	High	0	0.0004299
High	[R].ANTSALAVPSPVSNSASAR.[H]	[N2]	P55268 [1347-1365]	0.00891627	0.000147799	1	0.575788	253.45	146.55	2.2125	High	0.000227625	0.00586655
High	[R].ANYTILK.[G]	[N2]	Q02487 [391-397]	0.0754668	0.00413981	1	1.30548	173.5	226.5	1.79	High	0.003291	0.05926
High	[R].AQPGTMSNGTETR.[G]	[N8]	Q9UGT4 [487-499]	0.0100973	0.000547017	1.4	1.15848	183.48	216.52	2.062	High	0.00049588	0.006039
High	[R].ATNSTATPSSTLGTTR.[I]	[N3]	Q9HC84 [4802-4817]	0.00198763	0.000295599	1.5	0.772798	224.75	175.25	2.46	High	0.00031685	0.001721
High	[R].ATNSTYLNEK.[S]	[N3]	P61647 [64-73]	0.0440971	0.00344901	1	1.07875	192.3	207.7	1.555	High	0.0028445	0.0326865
High	[R].CAPVNISCYAK.[F]	[N5]	Q8WWI5 [176-186]	0.0715129	0.00390264	1.5	1.47167	65.8	97.3	1.825	High	0.003033	0.0760296
High	[R].CDQCEENYFYNR.[S]	[N11]	P11047 [1012-1023]	0.0118914	0.000745025	1.33333	1.27986	134.833	152.333	1.83333	High	0.000581567	0.0110532
High	[R].CDVCAEGFTGFPSCYPTPSSSNDTR.[E]	[N22]	O15230 [458-482]	0.000571424	0	1	0.729572	230.633	169.367	3.07333	High	0	0.000235625
High	[R].CEICAPGFYGNALLPGNCTR.[C]	[N17]	O15230 [2003-2022]	0.0466026	0.0033263	1	0.995355	200.1	199.9	1.74333	High	0.00252267	0.0332706
High	[R].CLYGEAYPACSPGNTSTAEEELCR.[L]	[N14]	O76024 [733-756]	3.07661e-05	0	1.25	0.839983	214.8	185.2	2.865	High	0	1.42142e-05
High	[R].CNGSGTYVCGLCECSPGYLGTR.[C]	[N2]	P18084 [476-497]	5.06607e-05	0	1	0.893855	210.45	189.55	3.4025	High	0	1.63021e-05
High	[R].CPMAGISHTAWHSNR.[T]	[N14]	Q9UMR5 [276-290]	0.000182106	0	1	0.585138	167	101.8	3.395	High	0	8.5145e-05
High	[R].CPNGTCIPSSK.[H]	[N3]	Q92673 [1244-1254]	0.0382833	0.00154529	1	1.87266	66.25	121.075	1.2525	High	0.00134772	0.0286122
High	[R].CRPGSFGNATGSR.[G]	[N8]	Q7Z7M0 [1194-1206]	0.108853	0.00530105	1	0.689814	178.167	126.3	1.11333	High	0.00437317	0.0878733
High	[R].DAGVGFPEYQEEDNSTYNFR.[W]	[N14]	P11717 [734-753]	0.0176549	0.000827962	1.8	1.43184	160.54	239.46	2.226	High	0.000732	0.0137468
High	[R].DAGVVCTNETR.[S]	[N8]	Q08380 [118-128]	0.0344543	0.00151756	1.5	1.58856	154.25	245.75	1.555	High	0.00274318	0.0398712
High	[R].DCVLQCEEQNCSGGALNHFR.[S]	[N10]	Q96FM1 [31-50]	0.0680721	0.00401048	1	1.78253	115.05	203.5	2.2975	High	0.003186	0.0552455
High	[R].DCVSNGSLGCPVR.[L]	[N5]	Q9HCN3 [228-240]	0.00920078	0.000424528	1	1.04895	192.067	207.933	1.86333	High	0.0003888	0.00617767
High	[R].DDAGNYTCIASNGPQGQIR.[A]	[N5]	Q13308 [563-581]	0.0296268	0.00190054	2.16667	0.946223	204.483	195.517	2.21167	High	0.00150645	0.0222125
High	[R].DFQHLLNR.[T]	[N7]	Q13444 [231-238]	0.036729	0.00150191	1	1.13218	187.375	212.625	2.5425	High	0.00126943	0.025205
High	[R].DGTPLSDGQSNHTVSSK.[E]	[N11]	Q13308 [165-181]	0.182148	0.00979488	1	1.62602	152.4	247.6	1.07	High	0.007862	0.1542
High	[R].DHHGANFSCR.[T]	[N6]	P05362 [178-187]	0.00177916	0	1.25	1.50943	158.65	241.35	2.91	High	0	0.000915175
High	[R].DHPNATVWR.[K]	[N4]	Q9UMR5 [203-211]	0.0431249	0.0015062	1.66667	0.932836	200.3	199.7	2.46	High	0.001469	0.0301667
High	[R].DHVHCLGNR.[T]	[N8]	Q9BRN9 [162-170]	0.0288355	0.00114875	1.25	0.750328	228	172	1.9375	High	0.0010118	0.0195275
High	[R].DINSQQELQNITTDTR.[F]	[N10]	P10586 [957-972]	0.00385586	0.000113731	1.66667	0.926069	204.7	195.3	3.63	High	8.87833e-05	0.00275835
High	[R].DIYTFDGALNK.[S]	[N10]	Q08722 [64-74]	0.00244852	0	2.5	0.940291	169.025	160.3	2.1425	High	0	0.00123806
High	[R].DLASSENGTECR.[S]	[N7]	O95196 [349-360]	0.00463095	0.000227462	1	0.648088	241.6	158.4	2.22667	High	0.000177567	0.0025373
High	[R].DLGPTLANSTHHNVR.[L]	[N8]	P04062 [302-316]	0.000458323	0	1.5	0.639591	242.95	157.05	3.2725	High	0	0.000235628
High	[R].DLQANDTGR.[Y]	[N5]	P32004 [486-494]	0.0563293	0.00339403	1	2.00401	132.6	267.4	1.67	High	0.002597	0.039143
High	[R].DMNQTLGDNITVK.[M]	[N9]	Q8TCT8 [147-159]	0.116036	0.00651667	1	0.912131	208.833	191.167	1.11333	High	0.00504933	0.0911033
High	[R].DNATLQATLHAAR.[D]	[N2]	O15230 [2422-2434]	1.96281e-05	0	1	1.02643	155.925	158.325	3.3125	High	0	5.50372e-06
High	[R].DNHTHSDIQVK.[L]	[N2]	Q8IV08 [386-396]	0.00676241	0.000147799	1.25	1.28329	116.425	143.525	1.4275	High	0.00256392	0.0462455
High	[R].DPCSNVTCSFGSTCAR.[S]	[N5]	O00468 [246-261]	0.00028594	0	1.25	1.07325	192.375	207.625	3.2375	High	0	0.000112008
High	[R].DPYCAWSVNTSR.[C]	[N9]	Q9C0C4 [514-525]	0.0129217	0.000682386	1	0.496524	267.3	132.7	2.27	High	0.0005327	0.008855
High	[R].DSEAFCHANCSGPAPAAKPDPDGGR.[A]	[N9]	Q92791 [71-95]	0.0412083	0.000591197	1	0.893655	211.2	188.8	1.32	High	0.0009105	0.02863
High	[R].DVMQVANTTMSSR.[S]	[N7]	P08069 [741-753]	0.025194	0.00125936	1.33333	0.528262	257.1	142.9	2.13667	High	0.00110033	0.0184001
High	[R].DVNCSVMGPQEK.[K]	[N3]	P53634 [51-62]	0.0334958	0.00189193	1.33333	1.11029	188.133	211.867	2.24	High	0.001448	0.0232259
High	[R].EACQGTSPPVVSCYNASDHVYK.[G]	[N15]	O95274 [149-170]	0.0124582	0.000442185	2.25	1.23571	140.55	171.35	2.53	High	0.000348	0.00914318
High	[R].EADNHTAFIR.[I]	[N4]	Q92545 [287-296]	0.0343089	0.00238877	1	0.860092	142.8	124.667	1.97333	High	0.00191723	0.0272329
High	[R].EAGNHTSGAGLVQINK.[S]	[N4]	P20645 [80-95]	0.0112942	0.000170596	1.5	0.987654	200.55	199.45	2.2	High	0.000133175	0.00790371
High	[R].EAINITLDHK.[C]	[N4]	O00469 [206-215]	0.00169113	0	1	1.01061	91.45	91.6	2.35	High	0	0.000811877
High	[R].EASIVGENETYPR.[A]	[N8]	Q9UBV2 [601-613]	4.0721e-05	0	2.25	1.26183	115.675	139.8	2.9175	High	0	0.000104816
High	[R].EEAMLYHNQTAELR.[E]	[N8]	Q92791 [354-367]	0.00917058	0.000682386	1	0.886525	212	188	1.8	High	0.0005327	0.006146
High	[R].EEQFNSTYR.[V]	[N5]	P01861 [173-181]	0.0311555	0.000591197	1	1.49254	160.5	239.5	1.08	High	0.0009105	0.02102
High	[R].EERPLNASALK.[L]	[N6]	O14657 [59-69]	0.0334511	0.00245968	1	1.62206	152.5	247.5	1.69	High	0.00190985	0.0215755
High	[R].EETLLYDSNTSSMADR.[K]	[N9]	Q9UIQ6 [440-455]	0.0006705	7.38996e-05	2	1.38169	166.363	233.637	2.59125	High	0.000726213	0.00807501
High	[R].EGICNGFTALCPASDPKPNFTDCNR.[H]	[N19]	O14672 [533-557]	0.0367918	0.00182138	1.55556	1.16219	165.567	202.944	1.90556	High	0.00209843	0.0357
High	[R].ELAVPDGYTNR.[T]	[N10]	P26006 [77-87]	0.0124024	0.000706568	2.25	0.989854	200.25	199.75	2.1175	High	0.0005946	0.007594
High	[R].ELQGNCSR.[L]	[N5]	Q07954 [110-117]	0.120777	0.00717999	1	2.34192	82	180.5	1.325	High	0.0057335	0.091915
High	[R].ELYNGTADITLR.[F]	[N4]	Q92508 [2291-2302]	0.011967	0	1	1.20337	181.6	218.4	1.43	High	0	0.006284
High	[R].ENATVPENEEEIIR.[K]	[N2]	Q8IWB1 [26-39]	0.0598572	0.00297085	1	1.54162	156.967	243.033	1.88	High	0.00239633	0.0496789
High	[R].ENVGIYNLSK.[G]	[N7]	Q5JPE7 [612-621]	0.0131378	0.000745025	1.66667	1.47275	160.067	239.933	2.28333	High	0.00226833	0.0372358
High	[R].EQINITLDHR.[C]	[N4]	Q02809 [194-203]	6.82633e-05	0	1	0.860092	106.633	89.6333	3.08	High	0	2.83407e-05
High	[R].EQQLESCACNETDNSCK.[V]	[N10]	P78536 [585-601]	0.0201528	0.00105822	1.66667	2.149	112.867	242.9	2.71667	High	0.000829	0.0147312
High	[R].ERPPTFLTPEGNASNK.[E]	[N12]	Q92823 [265-280]	0.000176216	0	3	1.10132	190.3	209.7	2.81	High	0	8.734e-05
High	[R].ESWGQESNAGNQTVVR.[V]	[N11]	Q9NY97 [163-178]	0.000194089	0	2	0.82713	178.25	150.3	2.36	High	0	0.000160692
High	[R].ETCSGNSSQCAPNIHK.[M]	[N6]	Q9P0K1 [514-529]	0.113599	0.00722003	1	1.08578	191.8	208.2	1.19	High	0.005478	0.07983
High	[R].FGTCSQLCNNTK.[G]	[N9]	Q07954 [3831-3842]	0.00721143	0.000591197	2	1.7762	144.1	255.9	1.85	High	0.0009105	0.03166
High	[R].FINYNQTVSR.[M]	[N5]	Q8N766 [909-918]	0.0897998	0.0051764	2	0.819001	116.3	122.55	2.01	High	0.0039515	0.06553
High	[R].FNHTQTIQQK.[Q]	[N2]	Q92823 [222-231]	0.0167806	0.00043752	1.25	0.774443	185.35	144.625	2.165	High	0.00044925	0.0115289
High	[R].FNPNISWQPIPVHTVPITEDR.[L]	[N4]	P11117 [130-150]	0.000729704	0	2	0.823316	218	182	2.47	High	0	0.000396731
High	[R].FNSTEYQVVTR.[V]	[N2]	Q07954 [445-455]	0.0257451	0.00076187	1.5	0.736377	228.45	171.55	2.41	High	0.00082185	0.01798
High	[R].FNVSLDSVPELR.[W]	[N2]	Q02083 [36-47]	0.00958397	0.000318396	1.5	0.79713	221.5	178.5	2.17	High	0.000833875	0.0177525
High	[R].FQVNNTRPPHVQLLR.[K]	[N4]	P35475 [369-383]	0.000258946	0	1.4	0.855725	215.5	184.5	2.586	High	0	0.000122334
High	[R].FSGVNDTDFR.[V]	[N5]	Q9UKY4 [579-588]	0.051474	0.00241408	1	1.19261	182.35	217.65	1.6	High	0.00209875	0.03431
High	[R].FTFTSHTPGDHQICLHSNSTR.[M]	[N18]	Q7Z7H5 [100-120]	0.00529062	0	1.25	0.50163	266	134	2.39	High	0	0.00292449
High	[R].GANDSTSAMPEQMK.[F]	[N3]	O95084 [205-218]	0.0562214	0.00301013	1	1.47565	160.833	239.167	0.91	High	0.0025033	0.044584
High	[R].GDKNVTMGQSSAR.[M]	[N4]	P48960 [368-380]	0.0617304	0.00358315	1	1.12994	109.9	126.6	1.455	High	0.00301425	0.04811
High	[R].GFQWVTGDNNTSYSR.[W]	[N9] Or [N10]	P07204 [107-121]	0.0145102	0.000535972	1.75	1.4245	164.575	235.425	1.905	High	0.000461425	0.00896733
High	[R].GGGDPWTNGSGLALCQR.[Y]	[N8]	Q9GZU1 [152-168]	0.0045569	0	1.66667	0.776398	224.333	175.667	1.99333	High	0.001826	0.0301967
High	[R].GHCWGPGPTQCVNCSQFLR.[G]	[N13]	P04626 [518-536]	1.44537e-06	0	1	0.924214	207.8	192.2	4.32	High	0	4.966e-07
High	[R].GHPQILEAAGNASAGTVLLR.[W]	[N11]	Q13332 [930-949]	1.08471e-06	0	1	0.759494	226.9	173.1	3.79333	High	0	2.12467e-07
High	[R].GHTLTLNFTR.[N]	[N7]	P11279 [97-106]	0.000548511	0	2	0.782014	184.525	149.275	3.2675	High	0.000133175	0.0009059
High	[R].GICNSSDVR.[G]	[N4]	O75882 [297-305]	0.108102	0.00572471	1	1.0453	195.233	204.767	1.27333	High	0.0046555	0.0842567
High	[R].GNHTQSALLAGLR.[K]	[N2]	Q7Z5N4 [1332-1344]	0.000256717	0	1.25	0.911369	176.65	162.2	3.3375	High	0	0.000111453
High	[R].GNITEYQCHQYITK.[M]	[N2]	Q92896 [209-222]	0.10626	0.00678806	1	1.9685	134.8	265.2	1.42	High	0.005194	0.07392
High	[R].GNVTQHVQGHR.[N]	[N2]	Q15043 [76-86]	0.000220182	0	2.25	0.660175	205.225	135.95	3.115	High	0	0.000129082
High	[R].GPECSQNYTTPSGVIK.[S]	[N7]	O14786 [144-159]	0.00339313	0	1.5	1.22699	179.5	220.5	1.94	High	0	0.00163985
High	[R].GSEGGNGSNPVAGLETDDHGGK.[A]	[N6]	Q8TBP5 [78-99]	0.013647	0.000310847	1.33333	1.09131	189.067	210.933	2.16667	High	0.0002444	0.00995163
High	[R].GSSVILNCSAYSEPSPK.[I]	[N7]	Q92859 [67-83]	0.00880959	0.000636792	1	0.776699	225.1	174.9	1.915	High	0.0005832	0.0055545
High	[R].GVFITNETGQPLIGK.[V]	[N6]	P10253 [465-479]	0.0168961	0.000949678	1.5	1.14188	185.825	214.175	1.88	High	0.0007891	0.0121193
High	[R].GVYELTHNNK.[T]	[N9]	Q7Z388 [115-124]	0.0233881	0.000776345	1.5	1.02041	61.7	63.15	1.58	High	0.000606	0.0144275
High	[R].GWSCTDNSTAQTVAQQR.[A]	[N7]	Q9HCN3 [529-545]	0.0473635	0.00209912	1	1.04932	194.675	205.325	1.01	High	0.00174413	0.0367225
High	[R].GYQGDGISHCNR.[T]	[N11]	Q7Z7M0 [1105-1116]	0.0219841	0.00155269	1	0.912409	209.2	190.8	1.85	High	0.001212	0.01243
High	[R].GYYNQSEAGSHTLQR.[M]	[N4]	Q95604 [107-121]	0.000706162	0	2	1.45138	163.2	236.8	1.82	High	0	0.0002614
High	[R].GYYNQSEAGSHTVQR.[M]	[N4]	P01892 [107-121]	9.67083e-07	0	1.5	1.21396	180.425	219.575	3.49	High	0	3.38743e-07
High	[R].HEEGHMLNCTCFGQGR.[G]	[N8]	P02751 [535-550]	0.0225141	0.00118502	2	1.5241	135.5	211.388	2.4075	High	0.00148175	0.0182178
High	[R].HFNDSGACVPR.[C]	[N3]	P21860 [248-258]	0.000271678	0	1.25	0.665557	197.25	134.95	3.2475	High	0	0.00013475
High	[R].HLELAGENPSSDINCTK.[V]	[N14]	Q02742 [45-61]	0.0382131	0.00214957	1	0.90525	207.133	192.867	1.71	High	0.00188367	0.0272787
High	[R].HLNSTDDADR.[I]	[N3]	Q9Y2G5 [257-266]	0.0668299	0.00381472	1.33333	0.889416	159.567	138.333	1.81333	High	0.0030669	0.0506267
High	[R].HPGNFSSLSCDYFAVNQSR.[L]	[N4; N16]	P08648 [709-727]	0.00783401	0	1	0.772499	225.5	174.5	1.6	High	0	0.004244
High	[R].HPVNECAPYQR.[S]	[N4]	Q3MIR4 [142-152]	0.00180347	0	1.25	0.605327	207.35	127.575	3.095	High	0	0.000918925
High	[R].HRPTAGAFNHSDLDAELR.[R]	[N9]	P09758 [160-177]	0.0102264	0.000170596	1.75	0.903342	209.775	190.225	1.8525	High	0.000481175	0.010604
High	[R].HVVYWNSSNPR.[L]	[N6]	P52798 [28-38]	0.00205788	0.000227462	1	0.614628	247.7	152.3	2.38333	High	0.000177567	0.0012549
High	[R].IAPASNVSHTVVLRPLK.[A]	[N6]	P43308 [83-99]	0.000237041	0	2	0.950344	131.2	118.85	2.04	High	0	0.00010663
High	[R].ICPQGYTCCTSEMEENLANR.[S]	[N19]	P35052 [61-80]	0.00259158	0	2.5	0.594001	250.95	149.05	2.08	High	0	0.00127085
High	[R].IETILLNGTDR.[K]	[N7]	Q07954 [723-733]	0.0278487	0.000591197	1	1.42248	165.2	234.8	1.36	High	0.0009105	0.01866
High	[R].IEVANLNGTSR.[K]	[N7]	O75197 [132-142]	0.0875711	0.00465743	2	0.898473	210.7	189.3	1.46	High	0.004024	0.06965
High	[R].IFENADNGTTVIR.[L]	[N7]	Q9UN73 [251-263]	0.00237699	0	1	0.615764	246.6	153.4	2.13	High	0	0.0011605
High	[R].IHNVTASDSGK.[Y]	[N3]	O00478 [113-123]	0.000157902	0	1	0.750188	228.6	171.4	2.27	High	0	6.491e-05
High	[R].ILAPELSHANATR.[N]	[N10]	P51168 [126-138]	0.000527162	0	2	0.496771	267.3	132.7	2.06	High	0	0.000244
High	[R].ILCDNADNITR.[V]	[N8]	Q92626 [1273-1283]	0.0083778	0.000197066	1.33333	1.56087	155.7	244.3	1.85667	High	0.0003035	0.0048597
High	[R].INTTADEKDPTNPFR.[F]	[N2]	O14672 [277-291]	0.0305993	0.000636792	1	1.12486	114.25	137.75	1.125	High	0.0007216	0.021595
High	[R].IVCVTSPAPNGTTGPVR.[V]	[N10]	Q9ULL4 [891-907]	0.122183	0.00699591	1	0.693001	234.5	165.5	1.06	High	0.00551767	0.0962967
High	[R].IVSPEPGGAVGPNLTCR.[W]	[N13]	Q6UXD5 [361-377]	3.99501e-05	0	2.25	1.17925	182.75	217.25	2.925	High	0	1.50846e-05
High	[R].KDNTTVTR.[L]	[N3]	P11279 [247-254]	0.074564	0.00377808	1	2.46305	31.7	78.1	2.2	High	0.003301	0.05464
High	[R].KENSSEICSNNGECVCGQCVCR.[K]	[N3]	P05556 [518-539]	0.001145	6.56886e-05	2.66667	1.39233	164.789	235.211	3.34889	High	0.000101167	0.0010525
High	[R].KGFCEAPGNR.[T]	[N9]	P27701 [190-199]	0.0045735	0	1	1.04275	195.8	204.2	3.09	High	0	0.002124
High	[R].KNASNMEYR.[I]	[N2]	Q9Y639 [196-204]	0.0298972	0.00181479	1.2	1.59337	87.92	141.44	2.72	High	0.00141854	0.0211709
High	[R].KNISIHQAYQQCK.[E]	[N2]	Q8N271 [539-551]	0.031329	0.000636792	1	0.797766	221.85	178.15	1.83	High	0.0007216	0.0222
High	[R].KNITDLVEGAK.[K]	[N2]	Q8IWA5 [199-209]	0.0230987	0.00076187	1	1.64745	149.25	250.75	2.275	High	0.00068345	0.0164895
High	[R].KNNTYLVK.[R]	[N2]	Q6P4E1 [149-156]	0.10892	0.0057565	1	1.15607	143.333	161.933	2.79667	High	0.00457683	0.0864167
High	[R].KNYNNTWTR.[L]	[N4]	O75054 [652-660]	0.0479963	0.00176874	1	1.06045	194.2	205.8	2.31	High	0.001392	0.03613
High	[R].KTNESVSEPR.[K]	[N3]	Q13433 [239-248]	0.00323093	0.000147799	2	0.846561	143.75	114.175	3.2375	High	0.000158425	0.00167055
High	[R].LANLTQGEDQYYLR.[V]	[N3]	P10909 [372-385]	0.000252937	0	1.5	0.951249	204.6	195.4	2.68	High	0	0.000200067
High	[R].LCDEGHGLEVEINCTR.[T]	[N13]	P25445 [106-121]	0.00393047	0	2	1.05708	194.5	205.5	2.27	High	0	0.001792
High	[R].LENITTGTYTIHAQK.[E]	[N3]	Q5JPE7 [367-381]	0.000333577	0	1	1.26342	176.3	223.7	2.88	High	0	0.000179271
High	[R].LFNVTPQDEQK.[F]	[N3]	O75144 [100-110]	0.011837	0.000341193	1.5	1.14482	186.5	213.5	2.705	High	0.00026635	0.00845015
High	[R].LFPNASQHITPSYNYAPNPDK.[H]	[N4]	Q8IWU5 [238-258]	0.0060886	0	1.5	2.07361	129.775	270.225	2.1225	High	0	0.00386847
High	[R].LGQAPANWYNDTYPLSPPQR.[T]	[N10]	Q8WVQ1 [79-98]	0.0200195	0.000623265	1.8	0.687285	236.44	163.56	2.566	High	0.0005801	0.0146767
High	[R].LHEITNETFR.[G]	[N6]	Q6EMK4 [112-121]	0.00334004	0.000147799	1.5	0.65136	200.525	129.025	2.95	High	0.000158425	0.00179762
High	[R].LLANSSMLGEGQVLR.[S]	[N4]	Q6UXD5 [244-258]	0.00815358	0.000287164	1.75	0.892957	209.55	190.45	2.255	High	0.000224825	0.00656041
High	[R].LLNCTAPGPDAAAR.[C]	[N3]	Q8N697 [138-151]	0.000911923	0	1.75	0.94697	205.05	194.95	2.4975	High	0.000133175	0.00152604
High	[R].LNAINITSALDR.[G]	[N5]	O43556 [196-207]	0.10402	0.00568511	1	1.002	199.8	200.2	1.1	High	0.004797	0.08396
High	[R].LNASIADLQSQLR.[S]	[N2]	O15230 [2208-2220]	0.00386384	0	2	0.838574	216.35	183.65	2.32	High	0	0.00218825
High	[R].LNGTDPIVAADSK.[R]	[N2]	Q07954 [4074-4086]	0.00555178	0.000424528	1	1.11566	88.1667	92.4	1.77333	High	0.0003888	0.00305433
High	[R].LNPTVTYGNDSFSAK.[A]	[N9]	P05362 [259-273]	0.0634155	0.00279652	1.33333	1.69014	148.1	251.9	2.36333	High	0.00217367	0.0535717
High	[R].LNTTGVSAGCTADLLVGR.[A]	[N2]	O15230 [3106-3123]	0.0268549	0.00164378	1	0.607995	248.525	151.475	2.1775	High	0.0012795	0.0215676
High	[R].LPNNHSTASPLGMPHGAAAFVDTCSGDK.[M]	[N4]	Q14573 [2402-2429]	0.0689523	0.00395121	1.5	0.712251	231.5	168.5	1.415	High	0.00300535	0.04868
High	[R].LSQAQGNLSVLETR.[Q]	[N7]	O75054 [819-832]	0.00158903	0.000147799	2.25	1.47113	161.775	238.225	2.33	High	0.000158425	0.0008845
High	[R].LTIVNSSVLDRPR.[A]	[N5]	Q92673 [867-879]	0.0467691	0.000591197	1	1.07759	192.6	207.4	1.31	High	0.0009105	0.0328
High	[R].LYANHTSLPASAR.[E]	[N4]	Q9NRB3 [277-289]	0.00151478	0	1	0.610687	247.75	152.25	1.93	High	0	0.0007158
High	[R].MDPPCTNTTAASTYLNNPYVR.[K]	[N7]	P10619 [327-347]	0.00113259	0	1.22222	1.06812	189.778	210.222	2.29333	High	0	0.000639188
High	[R].MSVINFECNK.[T]	[N9]	P11717 [427-436]	0.0779683	0.00377808	1	1.30208	173.8	226.2	1.45	High	0.003301	0.05752
High	[R].NASHLVCSACFGPCAR.[C]	[N1]	Q96HD1 [205-220]	0.0055265	0.000170596	1.25	0.587199	250.775	149.225	2.2925	High	0.000133175	0.00371734
High	[R].NCSAAPQPEPAAGLASYPELR.[L]	[N1]	O75718 [87-107]	0.00664322	0	1.33333	0.795123	177.633	134.767	2.70667	High	0	0.00454353
High	[R].NCSFEDDNIR.[S]	[N1]	Q4G148 [387-396]	0.0213746	0.000636792	1	0.902935	210.15	189.85	1.265	High	0.0005832	0.015726
High	[R].NCSTITLQNITR.[G]	[N1; N9]	Q14118 [641-652]	0.00151183	0	2.25	0.680504	237.95	162.05	2.4075	High	0.000158425	0.00106088
High	[R].NDTASYK.[C]	[N1]	P06731 [208-214]	0.092912	0.00465743	1	0.798085	222.4	177.6	2	High	0.004024	0.07424
High	[R].NDTLQEAK.[E]	[N1]	Q92896 [786-793]	0.088633	0.00587237	1	2.97619	100	300	1.855	High	0.004541	0.06615
High	[R].NETHSICTACDESCK.[T]	[N1]	Q6UXH1 [190-204]	0.000104594	0	2	2.42718	81.3667	204.467	3.36667	High	0	3.49234e-05
High	[R].NFSTCSPSTK.[T]	[N1]	P07949 [554-563]	0.0536675	0.00268313	2.33333	0.772002	200.567	154.167	1.84333	High	0.00224817	0.0414497
High	[R].NGSSIVDLSPLIHR.[T]	[N1]	P11717 [1656-1669]	6.84494e-07	0	1	0.788333	222.85	177.15	3.325	High	0	1.82035e-07
High	[R].NHSCSEGQISIFR.[Y]	[N1]	O75882 [731-743]	0.00172455	0	1	0.768344	225.4	174.6	2.79	High	0	0.00106191
High	[R].NHSIFLADINQER.[G]	[N1]	P50897 [197-209]	9.39897e-05	0	3.6	0.912076	208.96	191.04	3.454	High	0	8.14288e-05
High	[R].NHTWLPVSDDACYR.[E]	[N1]	P15529 [83-96]	0.0199047	0.000714629	1	0.637349	240.533	159.467	1.94	High	0.0007075	0.0123692
High	[R].NISQVLEK.[K]	[N1]	O14672 [439-446]	0.0424217	0.00264252	1	2.69724	107.875	292.125	1.845	High	0.00211962	0.0298633
High	[R].NITAQLPTK.[G]	[N1]	Q04771 [102-110]	0.00282519	0	1	0.82713	218.9	181.1	2.36	High	0	0.001235
High	[R].NLHQSNTSR.[A]	[N6]	P98160 [1750-1758]	0.00720042	0.000318396	1.25	0.947643	172.475	165.125	2.23	High	0.0002916	0.00452725
High	[R].NLSAPVTLNLR.[D]	[N1]	O00754 [930-940]	0.0726728	0.00354475	1	0.772798	225.633	174.367	1.63333	High	0.002889	0.0561333
High	[R].NLSVDGK.[N]	[N1]	Q9NYQ6 [1623-1629]	0.0950459	0.00670121	1	1.49477	112.2	168.1	1.92	High	0.005544	0.074005
High	[R].NLTEVPTDLPAYVR.[N]	[N1]	Q13641 [81-94]	0.00243068	0	1.5	0.741565	228.6	171.4	2.0675	High	0	0.00161195
High	[R].NLTQPEVIIQPSSR.[H]	[N1]	Q8N0Z9 [347-360]	0.00126831	0	2	0.836353	217.7	182.3	2.36667	High	0	0.000577813
High	[R].NNSNNFDLNR.[N]	[N1]	O75976 [626-635]	0.0248199	0.00088437	1	1.3089	173.25	226.75	1.655	High	0.000696	0.0186186
High	[R].NPCTSEQNCTSPFSYK.[N]	[N8]	P05556 [205-220]	0.00291002	0.000118239	1.6	1.50739	92.98	147.68	2.366	High	0.0001821	0.00245755
High	[R].NPNGTVTVISR.[Y]	[N3]	Q15223 [200-210]	0.0784353	0.00563252	1.33333	0.724638	165.067	130.333	2.04667	High	0.0044509	0.06089
High	[R].NQNESVSEIGGK.[I]	[N3]	Q68CR1 [525-536]	0.0616883	0.00228351	2	1.8315	141.3	258.7	1.53	High	0.002185	0.0445
High	[R].NQSLVQDMDSMVR.[L]	[N1]	Q8NHP8 [465-477]	0.00187475	0.000147799	1.5	1.25984	175.275	224.725	2.595	High	0.000158425	0.00107291
High	[R].NSSHSPLR.[T]	[N1]	Q92854 [191-198]	0.031224	0.00228327	1	0.689774	236.3	163.7	1.815	High	0.00195718	0.0219166
High	[R].NSTIEAANLAGLK.[I]	[N1]	P48723 [184-196]	0.00277087	0	1.5	1.08167	190.65	209.35	2.4725	High	0	0.00184297
High	[R].NTNENPQECFNASK.[L]	[N11]	Q13433 [256-269]	0.0262371	0.00143927	1.4	0.93985	184.64	173.68	1.9	High	0.0011266	0.0180706
High	[R].NTSAASTAQLVEATEELR.[R]	[N1]	P55268 [1249-1266]	0.00885002	0.000295599	1	0.844951	216.55	183.45	2.035	High	0.00045525	0.00568692
High	[R].NTSWDNAGFK.[G]	[N1]	P78536 [264-273]	0.076983	0.00413981	1	0.983284	201.7	198.3	1.42	High	0.00366	0.0606
High	[R].NTTEVVNTMCGYK.[T]	[N1]	O95858 [189-201]	0.00751312	8.44567e-05	1.42857	1.25831	173.543	226.457	2.19286	High	0.000130071	0.00497546
High	[R].NTTIFLK.[F]	[N1]	Q8NBN3 [62-68]	0.0309971	0.000591197	1	0.703235	234.8	165.2	1.86	High	0.0009105	0.02097
High	[R].NWTAAASPSAVFATR.[H]	[N1]	Q9NZV5 [190-204]	0.00819943	0.000233135	1.25	0.883978	212.1	187.9	2.5375	High	0.0001833	0.00690235
High	[R].NYTAEEK.[I]	[N1]	P22303 [495-501]	0.0176682	0.000591197	1	1.78891	42.4	75.8	2.21	High	0.0009105	0.01133
High	[R].QGEHLSNSTSAFSTR.[S]	[N7]	Q92626 [1362-1376]	0.000217673	0	1.25	0.897666	210.65	189.35	3.14	High	0	9.05572e-05
High	[R].QNQSLVYGK.[V]	[N2]	Q09328 [446-454]	0.0113701	0.000682386	1	0.76746	226.3	173.7	1.75	High	0.0005327	0.007713
High	[R].QTECMVEQYSNYSVNGEPVNGR.[H]	[N11]	P42892 [641-662]	0.000448858	0	1.33333	0.660939	240.667	159.333	2.85	High	0	0.000244647
High	[R].QTMIDFLQNHTEGSRPPACPR.[L]	[N9]	Q6ZRP7 [170-190]	0.0337921	0.0015758	1	0.708341	232.45	167.55	1.9025	High	0.00132275	0.0252904
High	[R].QTNPSAMEVEEDDPVPEIR.[R]	[N3]	P55072 [714-732]	0.00459335	0	1	1.51515	159	241	1.62	High	0	0.002869
High	[R].QTPEYQNESSR.[N]	[N7]	P11117 [171-181]	0.0701806	0.0035531	1	1.68445	148.533	251.467	2.02333	High	0.00276267	0.05469
High	[R].QVLNITDK.[D]	[N4]	P22223 [563-570]	0.0482456	0.00226972	1	2.12879	127.775	272.225	1.83	High	0.0018081	0.037815
High	[R].QVQLECVVLNR.[T]	[N10]	O75054 [833-843]	0.0352106	0.00155269	1	1.10865	189.6	210.4	2.09	High	0.001212	0.02123
High	[R].QVVENMTR.[A]	[N5]	P10253 [386-393]	0.0948903	0.00775613	1	1.74672	91.15	147.55	1.655	High	0.006305	0.0713
High	[R].RNESHLIDFR.[E]	[N2]	Q9UJ14 [197-206]	0.00678092	0.000424528	1	0.705716	234.5	165.5	2.41667	High	0.0003888	0.0045455
High	[R].RNQSLSLLYK.[V]	[N2]	Q06481 [540-549]	0.00371165	0.000147799	1	1.0142	158.325	159.9	3.23	High	0.000158425	0.00224893
High	[R].RPNQSQPLPPSSLQR.[F]	[N3]	Q92542 [415-429]	0.00168129	0.000147799	4.75	0.886918	210.825	189.175	2.685	High	0.000158425	0.00082105
High	[R].RPPLAELAALNLSGSR.[L]	[N11]	Q13641 [114-129]	0.00514054	0	1	0.428954	277.075	122.925	1.805	High	0	0.00326818
High	[R].RPYVSYVNNSIAR.[N]	[N8]	Q9Y2E5 [741-753]	0.0639317	0.00299359	1.33333	0.755097	227.4	172.6	1.94333	High	0.0023849	0.0537071
High	[R].SANSTLAQALHWTR.[S]	[N3]	Q9BU23 [614-627]	0.00808096	0	1	0.685636	237.225	162.775	2.2125	High	0	0.00533948
High	[R].SDEYNCSSGMCIR.[S]	[N5]	Q92673 [1160-1172]	0.0136017	0.000535972	1.25	1.32714	171.65	228.35	1.8225	High	0.000530625	0.0083565
High	[R].SDFSQTMLFQANTTR.[I]	[N12]	P23470 [433-447]	0.00487448	0	1	0.483247	268.233	131.767	2.10333	High	0	0.00322601
High	[R].SDLNPANGSYPFQALR.[Q]	[N7]	Q8NHP8 [509-524]	0.00646121	0.000118239	1.4	0.736703	229.76	170.24	1.982	High	0.00012674	0.00388896
High	[R].SEASEGNITVTCR.[A]	[N7]	Q29983 [214-226]	0.0228205	0.000714629	1.66667	0.677354	238.3	161.7	1.28333	High	0.00564833	0.0704333
High	[R].SEQLVNFTGK.[A]	[N6]	Q9BVX2 [181-190]	0.00141808	0	1	1.02249	197.7	202.3	1.97	High	0	0.0008226
High	[R].SGEDESQEDVLMDEAPSNLSQASTLQANR.[E]	[N18]	Q7Z6Z7 [2372-2400]	0.00994212	0.000227462	1	0.775795	222.967	177.033	1.98333	High	0.000177567	0.00610473
High	[R].SGWTGEYCNCTTSTDSCVSEDGVLCSGR.[G]	[N9]	P18564 [567-594]	2.69476e-06	0	1.25	4.0282	75	325	3.215	High	0	1.9433e-06
High	[R].SLLEFNTTVSCDQQGTNHR.[V]	[N6]	P11717 [107-125]	0.0154748	0.00058958	1	0.844119	215.133	184.867	2.27	High	0.000464	0.0115927
High	[R].SPIVTHCNVSTVNK.[G]	[N8]	Q9UN76 [167-180]	0.0378462	0.0020699	1	0.789578	223.5	176.5	2.32	High	0.0016455	0.0295731
High	[R].SQNDTVTPDVWYTSKPK.[E]	[N3]	Q9BTY2 [375-391]	0.0277924	0.00111754	1	0.876808	211.9	188.1	1.795	High	0.00087235	0.01768
High	[R].SVNPNDTCLASCVK.[S]	[N5]	O95857 [133-146]	0.00066524	0	2.5	1.02512	197.175	202.825	2.685	High	0	0.000614923
High	[R].SVTSNQSDGTQESCESPDVLDR.[H]	[N5]	Q9UGV2 [346-367]	0.000757889	0	1	0.881057	212.7	187.3	2.53	High	0	0.0004196
High	[R].SVYNCSGEACR.[G]	[N4]	P54802 [500-510]	0.0406624	0.00123743	1	1.30321	173.533	226.467	1.21667	High	0.000965667	0.0295933
High	[R].TAADTTGLQPILNQFTPANISR.[Q]	[N19]	P06756 [597-618]	0.0356998	0.00183302	1.5	1.21976	193.44	238.8	2.045	High	0.00156878	0.0261056
High	[R].TANHSAPSLENSVQPGK.[R]	[N3]	Q9UJ14 [521-537]	0.0806675	0.00499355	1.25	1.08755	135.55	165.125	1.645	High	0.00390525	0.0619955
High	[R].TASCSNVTCWLK.[D]	[N6]	P17301 [1052-1063]	0.024892	0.00164378	2	1.75208	100	168.85	2.515	High	0.0012795	0.0199538
High	[R].TCVSNCTASQFVCK.[N]	[N5]	Q07954 [3329-3342]	0.0937406	0.00527135	1	1.50376	159.8	240.2	1.26	High	0.0042325	0.067075
High	[R].TDCDSSTTSLCSFPVANVSLTK.[G]	[N17]	Q96G97 [72-93]	0.0202873	0.00084171	1	0.858615	215.133	184.867	2.21	High	0.000663333	0.0152153
High	[R].TEKEPLSDPVGTCYLSTDNFTR.[I]	[N19]	P08648 [164-185]	0.00136294	0	2	1.287	174.9	225.1	2.42	High	0.0009105	0.03571
High	[R].TETTMSPLTNTTTSQGTTR.[C]	[N10]	Q9HC84 [1765-1783]	0.173023	0.00932766	1	1.54321	157.4	242.6	0.91	High	0.007508	0.146
High	[R].TEVTQVNTTNCGR.[L]	[N7]	O95754 [503-515]	0.0228464	0.000714629	1.66667	0.776398	224.533	175.467	1.07667	High	0.00125033	0.0219313
High	[R].TGEQFSFNTTAAQPQYFK.[Y]	[N8]	Q8NBJ9 [158-175]	0.00374698	0.000591197	1	0.914077	209	191	2.12	High	0.0006337	0.002088
High	[R].THNLTDLSPHLR.[Y]	[N3]	P32004 [977-988]	0.000183384	0	1.25	0.583601	222.325	128.9	3.35	High	0	8.355e-05
High	[R].TILVDNNTWNNTHISR.[V]	[N6] Or [10]	P46977 [539-554]	0.0273812	0.00157354	2.14286	0.726066	231.357	168.643	2.44	High	0.00133386	0.020269
High	[R].TLNCSGGHVK.[L]	[N3]	Q9P0K1 [632-641]	0.0266688	0	1	0.938967	206.3	193.7	1.72	High	0	0.01913
High	[R].TPEQGSNGTDGASQK.[T]	[N7]	Q12913 [98-112]	0.00239992	0.000341193	1	1.97628	134.3	265.7	1.785	High	0.00026635	0.0014892
High	[R].TPHATCFNGEDFDRPVVVSNCSCTR.[E]	[N20]	Q92673 [655-679]	0.00573944	0.000136477	1	0.861326	213.94	186.06	2.24	High	0.00010654	0.00398049
High	[R].TQDEILFSNSTR.[L]	[N9]	Q6YHK3 [110-121]	0.0104758	0.000197066	1	1.78784	143.433	256.567	1.76	High	0.0003035	0.00687317
High	[R].TSIPTINMENK.[T]	[N10]	P26006 [960-970]	0.0682021	0.00373522	1	1.03842	195.95	204.05	1.435	High	0.00286335	0.04809
High	[R].TTLVDNNTWNNSHIALVGK.[A]	[N]	Q8TCJ2 [618-636]	0.0697378	0.00400567	2	1.12511	159.14	177.78	2.178	High	0.0031641	0.055223
High	[R].TVLENSTSYEEAK.[N]	[N5]	Q13510 [255-267]	0.000751603	0	2	1.7094	87.9	140.367	2.63333	High	0	0.000445568
High	[R].VCEIHEDNSTR.[S]	[N8]	Q29983 [118-128]	0.00205302	0	1	0.618812	210.575	132.25	2.4425	High	0	0.00101563
High	[R].VDEGEECDPGIMYLNNDTCCNSDCTLK.[E]	[N16]	P78536 [483-509]	0.0920545	0.00615684	1	1.43678	164.2	235.8	1.17	High	0.004824	0.07317
High	[R].VDNITDQFCNASVVDPACVR.[C]	[N3; N10]	O15118 [959-978]	0.00598222	0	1	0.648789	242.567	157.433	2.34333	High	0	0.00411871
High	[R].VESGENCSSPAPR.[E]	[N6]	Q14643 [2507-2519]	0.00914478	0	1	3.84615	82.5	317.5	1.46	High	0	0.006024
High	[R].VFGSQNLTTVK.[L]	[N6]	Q9Y4L1 [510-520]	0.0173623	0.00129241	1.75	1.28783	112.825	136.1	2.26	High	0.000991	0.0113527
High	[R].VFPQVNVTK.[M]	[N6]	P54802 [256-264]	0.0839709	0.00587217	1	1.11982	188.6	211.4	1.43	High	0.005297	0.06241
High	[R].VGNDTHCQPTK.[I]	[N3]	B0FP48 [138-148]	0.181302	0.00979488	1	2.07469	130	270	1.03	High	0.007862	0.1536
High	[R].VGYQSQNISCFFR.[L]	[N7]	Q6NSJ0 [505-517]	0.0238156	0.000295599	1	0.616523	247.25	152.75	1.045	High	0.00045525	0.01624
High	[R].VINQTTCENLLPQQITPR.[M]	[N3]	Q9Y5Y6 [770-787]	0.0199601	0.0011256	1.66667	0.770515	224.95	175.05	2.93167	High	0.000932167	0.0168334
High	[R].VISAGGNDSR.[S]	[N7]	Q58EX2 [571-580]	0.0159878	0.000341193	1	1.57604	154.45	245.55	2.05	High	0.00026635	0.0111575
High	[R].VIYNLTEK.[G]	[N4]	Q969V3 [425-432]	0.0415334	0.00155269	1	2.1645	126.5	273.5	1.61	High	0.001212	0.02559
High	[R].VLEAVNGTDAR.[L]	[N6]	O60487 [34-44]	0.07057	0.00499674	1.33333	0.632778	205.8	126.733	1.68	High	0.00438567	0.0675507
High	[R].VNASTTEPNSTVEQSALMR.[D]	[N2; N9]	P07942 [1335-1353]	0.0235296	0.00100888	1.3	1.52625	153.67	246.33	1.867	High	0.0012215	0.0243058
High	[R].VNITYNYPVR.[A]	[N2]	Q3MIR4 [285-294]	0.137787	0.00750666	1	0.554324	257.4	142.6	1.41	High	0.006143	0.1141
High	[R].VNLSAAPAPVSAVPTGLHSK.[M]	[N2]	O95502 [215-234]	0.0292835	0.00172321	1	0.925069	207.467	192.533	2.15667	High	0.00132133	0.0196662
High	[R].VNNTLSSQISR.[L]	[N2]	P11047 [1106-1116]	0.051863	0.00358726	1.33333	1.13766	143.433	163.3	2.12667	High	0.00288933	0.0392936
High	[R].VNSTELFHVDR.[H]	[N2]	Q7Z7M0 [420-430]	4.78099e-06	0	1	0.837287	176.433	151.233	3.99	High	0	1.57313e-06
High	[R].VPDAANLSSAWR.[N]	[N6]	O76082 [52-63]	0.0594316	0.0037812	1	0.730727	230.9	169.1	1.28	High	0.00310117	0.0447577
High	[R].VPPGDSPPGNGSGPR.[H]	[N10]	Q9BZR6 [363-377]	0.0366335	0.00190573	1.75	0.858185	213.45	186.55	1.635	High	0.0016043	0.02605
High	[R].VQGNSTLLHITDLQAR.[D]	[N4]	O75054 [98-113]	0.000198094	0	1.5	0.921234	202.575	197.425	2.4875	High	0	0.000103936
High	[R].VQPFNVTQGK.[Y]	[N5]	P13473 [352-361]	0.00637528	0	2	1.11142	155.1	168.7	3.035	High	0.000303	0.00500013
High	[R].VQQVGHYPPANSSLSSR.[S]	[N11]	Q24JP5 [61-77]	0.0157608	0.000403732	2.25	0.643294	242.925	157.075	1.4925	High	0.00107368	0.0189469
High	[R].VTGLNCTTNHPINPK.[G]	[N5]	P08648 [864-878]	0.0151682	0.00107194	1	0.992556	200.15	199.85	2.33	High	0.00092285	0.008742
High	[R].VTPACNTSLPAQR.[W]	[N6]	Q9UBG0 [64-76]	0.0198781	0.00107194	1	1.90295	85.25	146.45	1.97	High	0.00092285	0.011934
High	[R].VYGQNINNETWSR.[I]	[N]	Q9H8M5 [105-117]	0.0447965	0.00241408	2.5	0.808081	220.6	179.4	1.31	High	0.00209875	0.02933
High	[R].WCPQNSSCVNATACR.[C]	[N5; N10]	P48960 [29-43]	0.0245523	0.00120334	1.83333	0.973552	202.367	197.633	2.295	High	0.000913	0.0173489
High	[R].WLCDGDNDCGNSEDESNATCSAR.[T]	[N17]	Q07954 [912-934]	0.00122759	0	1	1.16144	184.933	215.067	2.17667	High	0	0.000663767
High	[R].WWHQQTNATQEVVR.[D]	[N7]	O00754 [127-140]	0.0115733	0	1	0.864678	124.3	106.3	1.825	High	0	0.0079715
High	[R].YAVYWNSSNPR.[F]	[N6]	P52803 [32-42]	0.00896336	0.000318396	1.5	0.562351	255.55	144.45	2.2475	High	0.0002916	0.005499
High	[R].YENGCAYFHEEER.[E]	[N3]	Q6P996 [131-143]	0.0062179	0	1	0.832639	218.2	181.8	1.26	High	0	0.0040445
High	[R].YEQLQNETR.[Q]	[N6]	P11117 [162-170]	0.0344752	0.00276325	1	1.87441	86.85	157.3	1.715	High	0.00222835	0.0223455
High	[R].YGENNSLSVEGFR.[K]	[N4]	Q13433 [64-76]	0.0483292	0.00261623	2	0.757576	226.933	173.067	1.56333	High	0.00218707	0.0390067
High	[R].YHGFLNTSYHR.[Q]	[N6]	P11117 [87-97]	0.00309585	0	1.5	0.567376	214.825	120.35	2.955	High	0	0.00205606
High	[R].YHNQTLR.[Y]	[N3]	P11717 [398-404]	0.0906871	0.00474907	1	1.0744	118.325	130.15	1.985	High	0.00384925	0.0725732
High	[R].YHQCYNGSGMDYR.[G]	[N6]	Q01974 [313-325]	0.0197982	0.00043378	1	1.0057	199.1	200.9	1.91	High	0.000336667	0.0148033
High	[R].YHSQTYGNGSK.[C]	[N8]	Q13438 [170-180]	0.00361845	0.000147799	1.5	1.40647	105.9	155.15	2.7425	High	0.000158425	0.00201883
High	[R].YHYNGSLMDGTLFDSSYSR.[N]	[N4]	Q96AY3 [291-309]	0.0506933	0.00244496	1.14286	0.81728	218.714	181.286	1.91429	High	0.00195571	0.0393998
High	[R].YHYNGTFEDGK.[K]	[N4]	Q96AY3 [67-77]	0.0115281	0.000170596	2.5	1.80505	142.45	257.55	2.6725	High	0.000133175	0.0073245
High	[R].YHYNGTFEDGKK.[F]	[N4]	Q96AY3 [67-78]	0.0291825	0.00157647	1	1.33779	100.2	150.9	2.23	High	0.00130885	0.0222416
High	[R].YHYNGTLLDGTSFDTSYSK.[G]	[N4]	Q96AY3 [179-197]	8.58946e-05	0	2	0.98668	201.35	198.65	4.18	High	0	4.20675e-05
High	[R].YKPDTLAVAVENGTGTDR.[Q]	[N12]	Q9H0X4 [378-395]	0.000848822	0	1.5	0.604047	249.15	150.85	1.985	High	0	0.00047035
High	[R].YNATVYSQAANGTEGQPQAIEFR.[T]	[N2; N11]	Q12913 [341-363]	0.00111383	0	1	0.664746	239.9	160.1	2.72	High	0	0.000674855
High	[R].YNCTATNHIGTR.[F]	[N2]	O15394 [473-484]	0.000311142	0	1	0.379903	289.825	110.175	2.9175	High	0	0.000132117
High	[R].YNSTIQESLHR.[S]	[N2]	Q9BYE2 [291-301]	0.00137668	0	1.25	0.966884	183.825	179.725	2.7175	High	0	0.000761048
High	[R].YVQNGTYTVK.[I]	[N4]	Q14126 [459-468]	0.0496963	0.00226972	1	1.81736	85.9	145.875	2.2975	High	0.0018081	0.0408031
High	[RK].NYTADYDK.[TA]	[N1]	O75477 [106-113]	0.0168719	0.000636792	1.5	2.25479	81.15	191.35	2.105	High	0.0005832	0.0120345

## Sheet: R2
Confidence	Annotated Sequence	Glycosylation site	Positions in master protein	Qvality PEP	Qvality q-value	# PSMs	Abundance Ratio: (117) / (115)	Abundances (Scaled): 115	Abundances (Scaled)117	XCorr Sequest HT	Confidence Sequest HT	Percolator q-Value Sequest HT	Percolator PEP Sequest HT
High	[K].AAIPSALDTNSSK.[S]	[N10]	Q08380 [542-554]	0.00402652	0	1	2.89575	102.633	297.367	2.67	High	0	0.00250607
High	[K].AALSWSNGNGTASCR.[V]	[N9]	Q12913 [223-237]	0.007726	0.000120268	2	0.839772	214.8	185.2	2.158	High	0.0002299	0.0058252
High	[K].AASMNHTK.[A]	[N5]	Q9UBV2 [213-220]	0.0379647	0.00161073	1.5	1.37221	100.375	129.2	1.865	High	0.00191835	0.044275
High	[K].AATCINPLNGSVCERPANHSAK.[Q]	[N9; N18]	O75882 [906-927]	0.00208772	0	1	0.850629	215.24	184.76	2.914	High	0	0.00130976
High	[K].ACNNSACDWDGGDCSGNSGGSR.[Y]	[N3]	Q3T906 [455-476]	0.184519	0.00987406	1	0.826446	219	181	1.79	High	0.007932	0.1551
High	[K].AEMNGSK.[L]	[N4]	P16422 [71-77]	0.0621994	0.00282508	2	0.839631	100.3	84.3	2.08	High	0.002194	0.04874
High	[K].AFNSTLPTMAQMEK.[A]	[N3]	P16070 [55-68]	0.0232954	0.000783984	1.375	0.895155	210.525	189.475	2.01375	High	0.000607513	0.0174048
High	[K].AGCECLNESDEHGFDNCLR.[K]	[N7]	O43396 [133-151]	0.0411407	0.00229319	1	1.03806	196.267	203.733	1.51667	High	0.00187033	0.0318431
High	[K].AGFEAVENGTVCR.[G]	[N8]	P29323 [258-270]	1.23633e-05	0	2	1.02093	197.7	202.3	3.8375	High	0	4.7743e-06
High	[K].AGHFQNTSSPSAR.[C]	[N6]	P36941 [172-184]	0.122851	0.00687958	1	0.595238	250.7	149.3	1.92	High	0.005611	0.09603
High	[K].AINDTAAR.[L]	[N3]	Q02487 [627-634]	0.102308	0.00602328	1.5	0.520698	211.65	107.55	1.66	High	0.004895	0.084015
High	[K].AINQTAVECTWTGPR.[N]	[N3]	Q92673 [1852-1866]	0.028759	0.00184661	1	1.72612	112.7	190	2.6	High	0.00141567	0.0208868
High	[K].ALMNGSESR.[F]	[N4]	P35613 [265-273]	0.000150477	0	1.66667	0.702247	233.9	166.1	2.96333	High	0	7.8781e-05
High	[K].ALSPNSTISSAPK.[D]	[N5]	Q9UH99 [632-644]	0.000959722	0	2.25	1.47874	121.65	176.6	2.6325	High	0	0.00348272
High	[K].AMSSNETAAYK.[I]	[N5]	Q8TCJ2 [637-647]	0.0108137	0.000200447	2	1.0218	197.567	202.433	2.06667	High	0.000155133	0.00759941
High	[K].ANATIEVK.[A]	[N2]	Q9Y639 [228-235]	0.0035561	0	1.75	1.1491	113.225	137.85	2.5075	High	0	0.0021695
High	[K].ANDSDQGANAEIEYTFHQAPEVVR.[R]	[N2]	Q08174 [304-327]	0.00295014	0	1	0.868056	214.1	185.9	2.24	High	0	0.00167
High	[K].ANIQFGDNGTTISAVSNK.[A]	[N8]	Q14108 [98-115]	0.00610132	0	1.25	0.972999	200.5	199.5	3.1075	High	0	0.00429731
High	[K].ANLTWSVK.[H]	[N2]	O00754 [366-373]	0.0949663	0.0037874	1	1.21655	180.5	219.5	1.4	High	0.002967	0.07545
High	[K].ANTTQPGIVEGGQVLK.[C]	[N2]	P06756 [73-88]	8.72604e-05	0	2.5	1.91847	137.05	262.95	3.685	High	0	0.00383324
High	[K].APDSNCSNLLITTR.[Q]	[N5]	A2RU67 [392-405]	0.0189859	0.00130967	1	0.702247	234.733	165.267	1.95	High	0.0010196	0.0134847
High	[K].AVLVNNITTGER.[L]	[N6]	Q8NBJ4 [104-115]	0.0422473	0.00210329	1.33333	0.664011	153.567	95.1	2.07333	High	0.00175993	0.0332843
High	[K].CATVTENATGDLATSR.[N]	[N7]	O43291 [88-103]	7.22458e-06	0	1.75	0.826105	160.1	130.15	2.84	High	0	2.46097e-06
High	[K].CCGAANYTDWEK.[I]	[N6]	P08962 [145-156]	0.00286255	0	4	1.13218	187.55	212.45	2.695	High	0.000131925	0.00394704
High	[K].CHAGYIGDNCNCSTDISTCR.[G]	[N11]	P18084 [576-595]	9.89698e-09	0	1.25	0.984979	201.5	198.5	5.255	High	0	3.5856e-09
High	[K].CHEGNGTFECGACR.[C]	[N5]	P05556 [477-490]	0.0186717	0.00117829	3.25	0.91617	208.575	191.425	3.16	High	0.0008935	0.0138668
High	[K].CINQSICEK.[C]	[N3]	O75882 [1071-1079]	0.018126	0.00088089	1	1.42113	164.867	235.133	1.72	High	0.0006809	0.012661
High	[K].CLSEGQPPPSYNWTR.[L]	[N12]	Q96NY8 [270-284]	0.00983024	0.000538533	2	0.743218	229.425	170.575	2.2325	High	0.000419175	0.00663263
High	[K].CNASSQFLCSSGR.[C]	[N2]	Q07954 [2904-2916]	0.00557258	0.000385177	1	1.55461	156.55	243.45	2.125	High	0.00030295	0.0034475
High	[K].CNMINGTDGDSFHPLITK.[D]	[N5]	Q14108 [245-262]	0.019827	0.000578606	1	0.894775	175.58	157.82	2.3	High	0.00043888	0.0150493
High	[K].CQEAINATCK.[G]	[N6]	P78536 [534-543]	0.000193929	0	2.5	1.09141	152.7	167.75	3.4175	High	0	0.000648128
High	[K].DIGNYSCAAQGTQTGSK.[K]	[N4]	Q9NYQ6 [1573-1589]	0.000179251	0	1.33333	1.21655	180.033	219.967	2.85333	High	0	9.1718e-05
High	[K].DLDTDFTNNASQPETK.[A]	[N9]	O75976 [1062-1077]	0.00127533	0.000213052	3	1.06838	156.775	168.75	2.255	High	0.000171025	0.00403987
High	[K].DMSDGFISNLTIQR.[Q]	[N9]	P13674 [105-118]	0.0424118	0.00224765	1.25	0.619771	246.825	153.175	1.1725	High	0.00181175	0.0315677
High	[K].DSDKEGTSNSTSEDGPGDGFTILSSK.[S]	[N9]	Q9P0M6 [164-189]	0.0343712	0.00175679	1	1.87441	138.85	261.15	1.785	High	0.00136085	0.026291
High	[K].DTGELNVTSILDR.[E]	[N6]	Q14126 [107-119]	0.00856845	0	1	1.11297	188.85	211.15	1.81	High	0	0.00593885
High	[K].DVECGEGHFCHDNQTCCR.[D]	[N13]	P28799 [518-535]	0.0244596	0.000624075	1.25	1.57978	154.725	245.275	1.4575	High	0.000476	0.0174446
High	[K].DYYPINESLASLPLR.[V]	[N6]	O96005 [290-304]	0.00912935	0.000172125	1	0.855615	208.225	191.775	2.745	High	0.000131925	0.00607337
High	[K].EDALNETR.[E]	[N5]	P10909 [82-89]	0.0497165	0.0018581	1	1.7316	106.4	187	1.46	High	0.001437	0.0386
High	[K].EIFVANGTQGK.[L]	[N6]	O95297 [45-55]	0.0154617	0.000538533	1	1.0238	197.55	202.45	1.63	High	0.000419175	0.0106387
High	[K].EINSLNLTESHNSR.[K]	[N6]	P23229 [925-938]	0.000932852	0	1.33333	0.769034	225.767	174.233	2.49667	High	0	0.000554749
High	[K].ENGMPMDIVNTSGR.[F]	[N10]	Q9Y639 [275-288]	0.0386011	0.00156203	2	0.732839	229.567	170.433	1.86111	High	0.00141741	0.0332136
High	[K].ENGTDTVQEEEESPAEGSK.[D]	[N2]	Q9Y4L1 [595-613]	1.50519e-07	0	5.25	1.45666	161.725	238.275	4.5175	High	0	7.48208e-05
High	[K].ENSSEICSNNGECVCGQCVCR.[K]	[N2]	P05556 [519-539]	0.000652991	7.65e-05	1.44444	1.15207	184	216	3.53222	High	5.86333e-05	0.00037908
High	[K].ENTSDPSLVIAFGR.[G]	[N2]	P11279 [83-96]	0.00327212	0	2.25	1.02617	177.125	178.25	2.865	High	0.00233475	0.0405321
High	[K].EPGSNVTMSVDAECVPMVR.[D]	[N5]	Q08380 [188-206]	0.0248691	0.00137933	1	0.950872	201.667	198.333	1.98667	High	0.00104733	0.0183072
High	[K].EQYIHENYSR.[A]	[N7]	O60568 [542-551]	0.000204892	0	3.25	1.00654	123.5	121.55	2.895	High	0	9.608e-05
High	[K].ETNFSLASGLEAK.[D]	[N3]	P56159 [57-69]	0.0285889	0.00195417	1	0.652742	242	158	1.33	High	0.001515	0.021
High	[K].EVEVNSSK.[C]	[N5]	P18564 [459-466]	0.0370203	0.00180067	1.25	3.98804	71.775	277	2.07	High	0.00162163	0.0305822
High	[K].FITNTETPLNNGSTPR.[I]	[N11]	Q96GX1 [362-377]	0.00783318	0.000172125	2.75	0.87203	213.35	186.65	2.015	High	0.000510675	0.00933675
High	[K].FLSSSPHLPPSSYFNASGR.[A]	[N15]	O14773 [429-447]	0.0342261	0.00151534	1.75	0.918063	207.975	192.025	1.7725	High	0.001529	0.030975
High	[K].FNSSSSSLEEK.[I]	[N2]	Q9H173 [192-202]	0.0356748	0.00220077	1.66667	1.04457	161.4	165.9	2.14	High	0.00266833	0.0421674
High	[K].FNSTQIAAMAPEHEEPR.[I]	[N2]	Q4G148 [236-252]	0.0678426	0.00428091	1	0.625978	245.6	154.4	0.81	High	0.0032605	0.05159
High	[K].FPDEEGACQPCPINCTHSCVDLDDK.[G]	[N14]	P04626 [616-640]	0.00208715	0	2	1.22324	179.7	220.3	2.275	High	0	0.0011909
High	[K].FVGTPEVNQTTLYQR.[Y]	[N8]	P01033 [46-60]	0.000822243	0	2.25	0.816827	184.025	146.825	2.7575	High	0	0.000497615
High	[K].FVNSTGYLTEAEK.[F]	[N3]	Q8NBK3 [139-151]	0.0208052	0.00195417	1	0.829187	218.7	181.3	2.36	High	0.001515	0.01486
High	[K].GLNLTEDTYKPR.[I]	[N3]	Q08380 [396-407]	5.85189e-05	0	1.25	2.39234	32.425	77.425	2.22	High	0	7.5635e-05
High	[K].GNPYSDLGNHTTCR.[Y]	[N9]	Q4KMQ2 [794-807]	0.0959045	0.00519485	1	1.12867	187.85	212.15	1.1	High	0.0041835	0.074685
High	[K].GNSTHGCSSEETFLIDCR.[G]	[N2]	Q03405 [221-238]	6.65415e-06	0	1.66667	1.45773	162.567	237.433	3.91333	High	0	2.6928e-06
High	[K].GPTNNTCVVR.[T]	[N4]	Q8TEM1 [1438-1447]	0.0424787	0.00060134	1	0.684463	237.4	162.6	1.9	High	0.0004654	0.03162
High	[K].GQTEIQVNCPPAVTENK.[T]	[N16]	Q16563 [56-72]	0.000251	0	1	1.141	185	214	3.565	High	0.00116223	0.0265958
High	[K].GSLSYLNVTR.[K]	[N7]	P07339 [257-266]	0.0147969	0.000688868	2	0.659522	210.55	136.25	2.1025	High	0.000535525	0.0103482
High	[K].GSQWSDIEEFCNR.[S]	[N12]	P08174 [84-96]	0.00729156	0.00065139	1.33333	0.79639	220.933	179.067	2.43	High	0.000505	0.00505037
High	[K].GSTLSQWSLGNGTPVTSK.[G]	[N11]	Q7Z2K6 [809-826]	0.0639484	0.00314503	1.33333	0.80429	137.533	104.9	1.74667	High	0.00264113	0.05586
High	[K].GTNFTHLVADR.[V]	[N3]	Q9C0C4 [417-427]	0.000663529	0	1	0.32077	228.525	74.075	3.855	High	0	0.000354
High	[K].GVAVTNTSK.[L]	[N6]	Q99571 [70-78]	0.00191011	0	1.5	1.47765	95.9	147.7	2.635	High	0	0.00112326
High	[K].GVLMVGNETTYEDGHGSR.[K]	[N7]	Q8IWA5 [181-198]	0.00186161	0.000172125	1	1.18064	183.45	216.55	1.585	High	0.000131925	0.00105743
High	[K].GVVDSDDLPLNVSR.[E]	[N11]	P14625 [435-448]	0.00590144	0.000488543	1	0.856409	215.467	184.533	2.19333	High	0.000383	0.00383684
High	[K].HLLENSTASVSEAER.[K]	[N5]	P42892 [162-176]	0.0794159	0.00387342	1	1.17925	182.65	217.35	1.565	High	0.003236	0.06356
High	[K].HLNASNPTEPATIIFTAAR.[E]	[N3]	Q8NFQ8 [284-302]	0.00324863	0	1	0.677966	238.4	161.6	3	High	0	0.001993
High	[K].HLNSSHPR.[S]	[N3]	Q5JTV8 [397-404]	6.96714e-06	0	1	0.895576	210.46	189.54	3.978	High	0	2.43075e-06
High	[K].HLTNDTTTPESTMTSGQAR.[A]	[N4]	Q9NWD8 [77-95]	0.00107668	0	1	0.687876	236.45	163.55	2.8625	High	0	0.0005864
High	[K].HMLALAPNSTAR.[R]	[N8]	Q92508 [2324-2335]	0.121538	0.00672986	1	1.07354	192.75	207.25	1.11	High	0.005332	0.098525
High	[K].HNNDTQHIWESDSNEFSVIADPR.[G]	[N3]	P14625 [215-237]	0.00135638	9.83571e-05	3.71429	0.652559	241.1	158.9	3.05286	High	7.53857e-05	0.000797559
High	[K].HNQSEYEDSAGECCSCPK.[T]	[N2]	P06213 [697-714]	0.0866632	0.00393462	1	1.26502	176.6	223.4	1.44	High	0.0031757	0.06727
High	[K].HTNMNLTQLK.[V]	[N5]	Q15165 [250-259]	0.00994365	0.000120268	1.2	1.33298	125.36	168.66	3.184	High	0.0002737	0.0146165
High	[K].IDAYNEAAVSILNSSTR.[N]	[N13]	Q96PB1 [229-245]	0.171793	0.00952012	1	0.596659	250.5	149.5	0.98	High	0.007667	0.1436
High	[K].IDSTGNVTNELR.[V]	[N6]	O75882 [411-422]	0.0174763	0.00076648	1.6	0.811688	218.42	181.58	2.408	High	0.00110916	0.025057
High	[K].IGYSNNGSDWK.[M]	[N6]	O14786 [517-527]	0.0660557	0.00228009	1.5	1.86393	139.65	260.35	1.6	High	0.0022207	0.05301
High	[K].IHVAGETDSSNLNVSEPR.[A]	[N13]	Q12913 [401-418]	1.81788e-06	0	1	0.790202	222.75	177.25	4.115	High	0	6.33592e-07
High	[K].ILLTCSLNDSATEVTGHR.[W]	[N8]	P35613 [153-170]	0.0539316	0.00259275	1.66667	0.878992	212.867	187.133	1.89333	High	0.00226267	0.0459619
High	[K].INATDADEPNTLNSK.[I]	[N2]	Q14126 [181-195]	0.000513594	0	1.66667	1.34048	159.2	217.817	4.00833	High	0	0.00028383
High	[K].INYTVPQSGTFK.[I]	[N2]	Q6YHK3 [418-429]	0.00021034	0	1	1.79211	39.1	70.2	2.79	High	0	0.0001049
High	[K].IQQESLGSAPLMGDDHPNASR.[D]	[N18]	Q5JRA6 [572-592]	0.0432568	0.00238829	1	2.00401	133.2	266.8	2.21	High	0.001847	0.03289
High	[K].ISSLQTTEKNDTVAGQGER.[D]	[N10]	P06756 [865-883]	0.0365645	0.00242413	1.5	1.79856	97.875	156.6	2.8275	High	0.00192925	0.0290743
High	[K].ITPNNNGTYACFVSNLATGR.[N]	[N6]	P06731 [645-664]	0.0599671	0.00327447	2.66667	0.832408	216.033	183.967	1.35333	High	0.00262213	0.0457633
High	[K].KEDALNETR.[E]	[N6]	P10909 [81-89]	0.0194811	0.00111145	1.25	1.40302	115.325	164.4	2.6675	High	0.000851425	0.0139723
High	[K].KGTNFTHLVADR.[V]	[N4]	Q9C0C4 [416-427]	0.030919	0.00153839	1	0.430942	189.95	73.9	1.6	High	0.00118735	0.0222
High	[K].KPNNLNDTIK.[E]	[N6]	Q11201 [109-118]	0.019514	0.0008321	2	1.10132	156.333	174.267	2.24667	High	0.000634667	0.013894
High	[K].LANNTHQHVFDDLR.[G]	[N3]	Q99523 [96-109]	0.0149788	0.000942636	3.8	0.818197	202.18	165.76	2.848	High	0.0007148	0.011175
High	[K].LEGMNETVSNLTQR.[V]	[N5; N10]	O75071 [292-305]	0.070958	0.00376528	1	0.690894	235.98	164.02	1.386	High	0.002999	0.055742
High	[K].LENLSSSEMGYTATLTR.[T]	[N3]	P10253 [138-154]	0.000860395	0	1.66667	1.12275	185.917	214.083	2.43667	High	0	0.000457204
High	[K].LEWLGNCSGLNDETYGYK.[E]	[N6]	P05026 [153-170]	0.000482671	0	1	1.51286	159.2	240.8	2.58	High	0	0.0002365
High	[K].LGDCISEDSYPDGNITWYR.[N]	[N14]	Q13740 [154-172]	0.081371	0.00478503	1	0.958313	202.15	197.85	1.195	High	0.00386905	0.0671055
High	[K].LGVIEDHSNR.[T]	[N9]	P14625 [494-503]	0.000308935	0	1	0.881834	179.025	157.25	2.72	High	0	0.000163457
High	[K].LLPAFNTTSGLPYPR.[I]	[N6]	Q9BZQ6 [190-204]	0.0286956	0.00091849	1	0.704391	234.467	165.533	1.75667	High	0.000714033	0.0207167
High	[K].LNITCESSK.[K]	[N2]	Q4KMQ2 [360-368]	0.0599333	0.00319699	1	0.726744	231.433	168.567	1.63333	High	0.00256967	0.0482699
High	[K].LNLQTSTSIPNVTEMK.[T]	[N11]	P17301 [95-110]	0.0173235	0	1	0.693481	236.2	163.8	1.71	High	0	0.01179
High	[K].LNQTEPVAGNYYPVNTR.[I]	[N2]	O00754 [765-781]	0.000177377	0	1	1.44718	163.267	236.733	3.31	High	0	9.39295e-05
High	[K].LPENQTSPGESPER.[G]	[N4]	Q12770 [587-600]	0.00274172	0.000172125	2	1.3587	168.825	231.175	2.6175	High	0.000131925	0.00169452
High	[K].LQFDDNGTYTCQVK.[N]	[N6]	O60487 [113-126]	0.00178441	0	1.33333	1.00604	199.133	200.867	2.81	High	0.0001759	0.00244207
High	[K].LQGLENWGQDPGVSANASK.[A]	[N16]	Q96AQ6 [440-458]	0.0110996	0	1	0.97371	201.7	198.3	2.14	High	0	0.00801298
High	[K].LQNNISYQMADIHHLK.[E]	[N4]	Q6P4E1 [112-127]	0.00267639	0.00011475	1.83333	1.43232	163.733	236.267	2.23	High	8.795e-05	0.0019079
High	[K].LSDTTSQSNSTAK.[E]	[N9]	P07942 [1271-1283]	0.000226212	0	2	3.35852	78.55	264.25	2.93	High	0.00011635	0.00889825
High	[K].LTSCATNASICGDEAR.[C]	[N7]	Q07954 [3782-3797]	4.51078e-05	0	1.5	1.49925	156.125	243.875	2.9325	High	0	2.14994e-05
High	[K].LVANESVPFETSCR.[Y]	[N4]	Q9NXG6 [345-358]	0.000145821	0	1	1.18859	182.667	217.333	3.12667	High	0	7.2664e-05
High	[K].LVGGPVAGGDPNQTIR.[G]	[N12]	O15230 [84-99]	1.17967e-05	0	2	1.0101	198.85	201.15	3.4875	High	0	6.67713e-06
High	[K].MNFTGGDTCHK.[V]	[N2]	P11717 [1311-1321]	0.000659725	0	1.2	1.22279	105.82	132.1	2.614	High	0	0.000400892
High	[K].MSVCTDNVTDLR.[I]	[N7]	Q6UXG2 [711-722]	0.00044758	0	1.6	1.30753	172.58	227.42	3.742	High	0	0.000255271
High	[K].MVLWNDSVVR.[H]	[N5]	Q9Y487 [501-510]	0.102259	0.00551422	1	1.06952	192.733	207.267	1.13667	High	0.00433967	0.0816033
High	[K].MYSEGSDIVPQSNETALHYFK.[K]	[N13]	Q9UBV2 [419-439]	0.0527737	0.00403397	1	1.00756	198	202	1.265	High	0.0032745	0.0396095
High	[K].NANGSYTCEECDSSCVGCTGEGPGNCK.[E]	[N3]	Q6UXH1 [249-275]	2.38982e-05	0	1.25	3.11769	79.775	262.45	3.965	High	0	9.09085e-06
High	[K].NATLAEQAK.[L]	[N1]	Q9Y4L1 [869-877]	0.00106327	0	1.66667	1.65289	120.6	198.4	2.42667	High	0	0.000878543
High	[K].NATYGYVLDDPDPDDGFNYK.[Q]	[N1]	O43852 [131-150]	0.00317922	0.00034425	2	1.52207	158.5	241.5	3.27	High	0.00026385	0.00191411
High	[K].NCTQSLQCWK.[Y]	[N1]	P46531 [1489-1498]	0.083	0.0058	1	1.058	193	206	1.37	High	0.0046	0.0649
High	[K].NELMLNSSLMR.[I]	[N6]	O00468 [130-140]	0.0569619	0.0020935	1	0.925497	207.7	192.3	1.285	High	0.0015987	0.042315
High	[K].NESLETYPVMK.[Y]	[N1]	P05026 [193-203]	5.77833e-06	0	1	1.01833	198.2	201.8	2.9	High	0	1.676e-06
High	[K].NETIWYLK.[Y]	[N1]	O15342 [70-77]	0.0731698	0.00386436	1	1.3089	171.233	228.767	1.89333	High	0.00306567	0.05687
High	[K].NGDAYGFYNNSVK.[T]	[N9]	Q6P4A8 [63-75]	0.0512089	0.00229169	1	0.678887	238.2	161.8	1.37	High	0.001729	0.03939
High	[K].NGSGAVFPVAGADVQTLR.[E]	[N1]	O00391 [130-147]	0.000805394	0	2	0.618047	247.2	152.8	2.54	High	0	0.0004428
High	[K].NGSTEIYGECGVCPR.[G]	[N1]	Q9P055 [37-51]	0.00823456	0.000488542	1.25	0.745851	228.9	171.1	2.1725	High	0.00037875	0.0057282
High	[K].NGVNGTGENGR.[K]	[N4]	P05556 [403-413]	0.0375994	0.00188342	2.33333	1.23085	148.8	189	1.92556	High	0.00148252	0.0293341
High	[K].NGVNGTGENGRK.[C]	[N4]	P05556 [403-414]	0.00473957	0.000269266	1.25	1.9025	75.0875	149.65	2.14625	High	0.000209588	0.00297575
High	[K].NITIVTGAPR.[H]	[N1]	P26006 [265-274]	0.016566	0.0006885	1	0.714286	233.3	166.7	1.83	High	0.0005277	0.0108
High	[K].NLNNSQSDVVSFR.[L]	[N3]	P08648 [771-783]	0.00851049	0.000538533	1.5	1.32319	172.15	227.85	1.4675	High	0.000419175	0.00655748
High	[K].NLTFEGPLPEK.[I]	[N1]	Q9HAT2 [401-411]	0.00171501	0	1	2.27531	121.95	278.05	2.175	High	0	0.0010229
High	[K].NMSFVNDLTVTQDGR.[K]	[N1]	Q9HDC9 [196-210]	0.0105485	0.00064232	1.83333	0.882613	211.983	188.017	2.87333	High	0.000499333	0.00792339
High	[K].NMTFDLPSDATVVLNR.[S]	[N1; N15]	P11279 [62-77]	0.00755823	0.000106526	1.375	0.879701	210.762	189.238	2.2625	High	8.55125e-05	0.0051651
High	[K].NNHTASILDR.[M]	[N2]	P08962 [129-138]	0.0184721	0.000620999	2.5	1.05778	170.962	179.388	2.645	High	0.00058765	0.016795
High	[K].NNTTFLECAPK.[S]	[N1]	Q99985 [585-595]	0.0121038	0.000429178	4.66667	0.507314	200.65	97.7833	2.63167	High	0.000329067	0.0102834
High	[K].NNTYLVK.[R]	[N1]	Q6P4E1 [150-156]	0.0201869	0.000429947	1.66667	1.11276	71.9667	77.1333	3.19	High	0.000331033	0.014161
High	[K].NPVGLIGAENATGETDPSHSK.[F]	[N10]	P43251 [340-360]	0.0100304	0.0002295	1	0.984898	201.5	198.5	3.46333	High	0.0001759	0.00688333
High	[K].NQSVPLSCCR.[E]	[N1]	O60637 [167-176]	0.107175	0.00882339	1	0.988142	201.2	198.8	2.05	High	0.006823	0.08772
High	[K].NSSQVLGEK.[V]	[N1]	Q9Y653 [303-311]	0.0594544	0.00293761	1.25	1.06866	192.375	207.625	1.865	High	0.00284975	0.0495175
High	[K].NSTCLDDSWIHPR.[N]	[N1]	Q96F46 [54-66]	7.9006e-05	0	1.33333	0.706547	234.2	165.8	2.88667	High	0	0.000268157
High	[K].NTNSSNNFSR.[S]	[N3]	Q9H0X4 [114-123]	0.0599679	0.00274164	1	0.938967	203.4	196.6	1.54	High	0.00240823	0.0475633
High	[K].NTSHGSTSQCK.[F]	[N1]	O75072 [92-102]	0.0282459	0.00192563	1.5	0.965251	176.575	171.925	2.005	High	0.00149042	0.0222038
High	[K].NTSVEHTR.[L]	[N1]	Q96JJ7 [258-265]	0.0108584	0.000385177	1.25	0.851426	180.15	154.025	2.4125	High	0.00030295	0.007231
High	[K].NTTSVWYTSK.[G]	[N1]	P04066 [382-391]	0.0414255	0.0013824	1	1.48699	160.7	239.3	2.135	High	0.0013025	0.0335001
High	[K].NVDMAGFIANNGTR.[E]	[N11]	Q9NYQ6 [1630-1643]	0.0467014	0.00243027	1.66667	1.14811	120.8	145.933	1.48	High	0.0019759	0.034621
High	[K].NVSCLWCNTNK.[A]	[N1]	P53801 [54-64]	0.0323729	0.00179283	1.5	0.842815	216.65	183.35	2.585	High	0.001366	0.0237327
High	[K].NVSVAEGK.[E]	[N1]	Q9P2B2 [286-293]	0.012779	0.000366408	1	2.00904	61.55	120.85	2.485	High	0.00028725	0.00876825
High	[K].NWQLTEEDFGNTSGR.[L]	[N11]	P30825 [216-230]	0.000213168	0	3.75	1.85787	139.875	260.125	3.4125	High	0	0.000951105
High	[K].NYSVLYFQQK.[V]	[N1]	P42785 [47-56]	0.0590007	0.00427824	1	0.728067	231.35	168.65	1.655	High	0.0034575	0.04457
High	[K].QCNGTSMCWCVNTAGVR.[R]	[N3]	P16422 [109-125]	0.0163592	0.000496698	1	0.579151	252.267	147.733	1.73667	High	0.000376117	0.0115207
High	[K].QDNETGIYYETWNVK.[A]	[N3]	O75503 [201-215]	0.0578551	0.00282508	1	0.473934	271.4	128.6	1.04	High	0.002194	0.04505
High	[K].QDQQLQNCTEPGEQPSPK.[Q]	[N7]	O00584 [206-223]	2.5361e-05	0	1.25	0.953971	204.2	195.8	3.0775	High	0	1.10519e-05
High	[K].QLSCVANQNGSQADCELGNPFK.[R]	[N9]	P23229 [762-783]	0.10178	0.00577189	1	0.989609	201	199	1.47	High	0.004617	0.08311
High	[K].QLVHSFAEGQDQGSAYANR.[T]	[N18]	Q5ZPR3 [74-92]	0.000202871	0	3.75	0.729262	206.125	150.375	3.25	High	0	0.000105824
High	[K].QNNGAFNETLFR.[N]	[N7]	P02786 [721-732]	0.0096265	0.000307201	2	0.634786	199.733	126.033	3.04889	High	0.000289444	0.00755701
High	[K].QPVSPVIHPPVSYNDTAPR.[I]	[N14]	Q15904 [248-266]	3.09955e-06	0	1.5	0.846203	183.825	153.725	4.4075	High	0	1.10963e-06
High	[K].QSGDVTCNCTDGR.[V]	[N8]	Q07954 [4357-4369]	0.133699	0.00726791	1	2.25734	122.9	277.1	1.7	High	0.005886	0.1051
High	[K].QYLSYETLYANGSR.[T]	[N11]	O95084 [83-96]	0.0086891	0.00146563	1	0.780031	224.7	175.3	1.59	High	0.001149	0.005765
High	[K].RGPECSQNYTTPSGVIK.[S]	[N8]	O14786 [143-159]	0.000352878	0	1.33333	1.00705	199.167	200.833	3.46667	High	0	0.000208733
High	[K].RNDAGSYECEIQNPASANR.[S]	[N18]	P40199 [207-225]	0.0975116	0.00750259	1	0.81367	220.5	179.5	1.19	High	0.005814	0.07914
High	[K].RQNITNQLEK.[W]	[N3]	Q68CQ7 [255-264]	0.125699	0.00972278	1	1.7094	147.7	252.3	1.66	High	0.007536	0.1043
High	[K].RQNQSLVYGK.[V]	[N3]	Q09328 [445-454]	0.0158277	0.000660667	1.25	0.667	239.775	160.225	3.23	High	0.000510675	0.0111197
High	[K].SCGECIQAGPNCGWCTNSTFLQEGMPTSAR.[C]	[N17]	P05556 [34-63]	0.0114051	0.000347444	1.44444	0.852192	214.022	185.978	2.42333	High	0.000268678	0.00845841
High	[K].SCVAVTSAQPQNMSR.[R]	[N12]	O15031 [517-531]	0.0026334	8.60625e-05	1.875	0.880475	194.938	171.562	3.065	High	6.59625e-05	0.00293859
High	[K].SDAVSHTGNYTCEVTELTR.[E]	[N9]	Q08722 [103-121]	0.00511825	0	2.5	0.857817	184.425	156.6	2.9425	High	0	0.00393317
High	[K].SDPHWESMLNATTR.[R]	[N10]	Q9H0X4 [305-318]	0.00507959	0.000100223	1.16667	0.899955	210.317	189.683	2.305	High	7.75667e-05	0.00389506
High	[K].SELVNETR.[W]	[N5]	Q9UGT4 [158-165]	0.0205898	0.0009581	1	1.67504	103.8	172.825	1.7575	High	0.0007352	0.014667
High	[K].SHTNTSHVMQYGNK.[T]	[N4; N13]	Q99538 [260-273]	0.0341168	0.00116733	1	0.953652	177.86	169.44	2.51	High	0.00107554	0.0265718
High	[K].SLTTSLHNK.[T]	[N8]	Q92673 [1887-1895]	0.00102111	0	2	1.06581	192.775	207.225	3.3625	High	0	0.000590661
High	[K].SLVTQYLNATGNR.[W]	[N8]	P08195 [417-429]	0.00413339	0.0001377	3.6	0.551694	234.72	139.26	2.712	High	0.00033534	0.00457348
High	[K].SNDTAASEYK.[Y]	[N2]	Q12913 [141-150]	0.00145955	0.000213052	1	1.67926	148.675	251.325	2.57	High	0.000171025	0.000900178
High	[K].SNVSGNTHLCISNGNYEK.[E]	[N2]	P56159 [405-422]	0.000658635	0	1.5	0.712251	233.1	166.9	2.435	High	0	0.0003332
High	[K].SPANGSLGPTLNLSSGESR.[L]	[N4; N12]	Q9BZC7 [1546-1564]	0.000150317	0	2.25	0.87127	212.925	187.075	3.5475	High	0	9.54363e-05
High	[K].STGCAAPMVYLDCSNSSAGTPGAECLR.[S]	[N15]	Q9HC84 [791-817]	0.00140479	0	1	0.804505	221.7	178.3	1.99	High	0	0.0007502
High	[K].TANDTSTEAYNLLLR.[T]	[N3]	P11047 [1203-1217]	0.00015942	0	1.5	1.39567	166.8	233.2	2.955	High	0	7.69e-05
High	[K].TAVNCSSDFDACLITK.[A]	[N4]	P13987 [40-55]	0.0557731	0.00241357	1.66667	0.869817	213.133	186.867	1.41667	High	0.00204223	0.0435087
High	[K].TCNPETFPSSNESR.[Q]	[N11]	Q8IWA5 [407-420]	0.0120769	0	1	1.31926	172.5	227.5	2.31	High	0	0.008154
High	[K].TCPAGVMGENNTLVWK.[Y]	[N10]	P00533 [594-609]	0.0616023	0.00282508	1	0.820345	219.7	180.3	1.12	High	0.002194	0.04817
High	[K].TFKNESENTCQDVDECQQNPR.[L]	[N4]	P48960 [105-125]	0.00521414	0	2	0.971345	202.25	197.75	2.445	High	0.000773	0.018379
High	[K].THEAEIVEGENHTYCIR.[F]	[N11]	P21333 [2185-2201]	2.29136e-05	0	1.5	1.07009	193	207	3.465	High	0	9.587e-06
High	[K].TLETHSNK.[T]	[N7]	Q92673 [1602-1609]	0.028866	0.00105761	1.25	1.67574	95.475	153.4	1.75	High	0.002611	0.0436937
High	[K].TLSPTGNISSAPK.[D]	[N7]	O94901 [726-738]	0.000217004	0	1.75	1.00629	198.9	201.1	2.9025	High	0	0.000108383
High	[K].TMFNSTDIK.[L]	[N4]	Q96K49 [65-73]	0.0229017	0.00102527	1	0.834028	213.2	186.8	1.576	High	0.00078876	0.0161106
High	[K].TNNSTCQPCPYGSYSNGSDCTR.[C]	[N3; N16]	Q6UXG2 [389-410]	0.000121076	0	2	1.18378	183.05	216.95	3.755	High	0	6.12362e-05
High	[K].TPMTNSSIQFLDNAFR.[K]	[N5]	P15586 [275-290]	0.0265528	0.00064492	1	0.788022	214.65	185.35	1.615	High	0.00049655	0.01873
High	[K].TSNSSQVSNEQDK.[I]	[N3]	Q5JRA6 [248-260]	6.98172e-05	0	2.33333	1.07836	192.4	207.6	2.39667	High	0	4.65933e-05
High	[K].TVTSASNNETYCR.[S]	[N8]	P25106 [185-197]	0.00891458	0.000214973	3	0.618047	247	152	2.58889	High	0.000165517	0.00627928
High	[K].TVTTSGTTNNTVTPTSQPVR.[K]	[N9]	Q04900 [138-157]	3.11503e-05	0	2.25	0.721631	231.975	168.025	3.785	High	0	1.35998e-05
High	[K].TVVTYHIPQNSSLENVDSR.[Y]	[N10]	O75144 [61-79]	0.04212	0.0013824	2	0.744602	228.55	171.45	1.69	High	0.0028665	0.051691
High	[K].TYNASVLPVR.[V]	[N3]	Q96S52 [368-377]	0.0107817	0.000732815	1	0.761615	219.9	180.1	2.04	High	0.0005745	0.0072815
High	[K].TYNGTNPDAASR.[A]	[N3]	O60637 [125-136]	0.0660802	0.00270576	1	1.96947	134.65	265.35	1.5875	High	0.00241693	0.0527442
High	[K].VASVININPNTTHSTGSCR.[S]	[N10]	P13473 [248-266]	0.0168819	0.000787229	2.75	0.721696	230.063	169.937	3.87	High	0.000655	0.0136907
High	[K].VCNEDQTNCTVPTYPSCR.[D]	[N8]	Q9HBA0 [644-661]	0.0125468	0.000572922	1	0.795703	221.65	178.35	2.4375	High	0.00043225	0.00945223
High	[K].VDCTANTNTCNK.[Y]	[N8]	P30101 [83-94]	0.0646442	0.00282508	1	1.33156	42.2	56.2	1.18	High	0.002194	0.05062
High	[K].VEAEALNATAIR.[V]	[N7]	Q13332 [727-738]	0.0184127	0.000718043	1	0.827815	218.867	181.133	1.71667	High	0.0005589	0.0126833
High	[K].VIDGTPCDQNGTAICVSGQCK.[S]	[N10]	Q6ZMP0 [364-384]	0.0673787	0.00225443	1	1.35501	169.85	230.15	1.01	High	0.0019735	0.05261
High	[K].VIEEFYNQTWVHR.[Y]	[N7]	P11166 [39-51]	0.00198499	0	1	0.825083	219.1	180.9	1.84	High	0	0.00117
High	[K].VLGQSQEPNVNPASAGNQTQK.[T]	[N17]	Q5VW38 [153-173]	0.0393089	0.00261393	1	1.02433	197.425	202.575	1.5975	High	0.00211175	0.0296015
High	[K].VNDSVPFHLGWNSTER.[S]	[N2; N12]	Q6NSJ0 [239-254]	0.00360389	0.000172125	1.5	0.728332	201.475	146.45	3.18	High	0.000131925	0.00216678
High	[K].VNNTAVIEK.[Q]	[N2]	Q9H330 [550-558]	0.0291855	0.00171989	2	1.13443	145.75	174.025	2.2925	High	0.00140275	0.022384
High	[K].VNVTVEDER.[T]	[N2]	P13726 [155-163]	0.150222	0.00905384	1	1.59236	154.3	245.7	1.49333	High	0.007358	0.126667
High	[K].VPGNQTSTTLK.[L]	[N4]	P32004 [668-678]	0.0335913	0.00230265	1	2.2818	66.85	155.125	1.98	High	0.00178342	0.0262502
High	[K].VSCPIMPCSNATVPDGECCPR.[C]	[N10]	P07996 [351-371]	0.0431086	0.00182366	1	0.8	221.9	178.1	2.09	High	0.001382	0.031735
High	[K].VSDNESSSNYTYK.[I]	[N4; N9]	Q12913 [388-400]	0.10892	0.0037874	1	0.803213	221.8	178.2	1.26	High	0.003317	0.08745
High	[K].VVDDVSNQTSCR.[L]	[N7]	O75462 [286-297]	0.0075651	0.000366408	1.75	0.968054	202.1	197.9	2.7	High	0.000593675	0.0119632
High	[K].VVNSTTGPGEHLR.[N]	[N3]	P07996 [1065-1077]	7.07486e-07	0	1	0.453001	274.625	125.375	4.575	High	0	2.37042e-07
High	[K].VVTQNSSSGNVTHEK.[I]	[N5; N10]	P43007 [197-211]	0.00134126	0.000209376	1	1.12885	166.414	192.257	2.54143	High	0.000164143	0.000834846
High	[K].VYYNCSCIER.[K]	[N4]	Q6ZQN7 [541-550]	0.0427008	0.00260124	1	0.61212	248.133	151.867	1.96333	High	0.00198047	0.0316173
High	[K].WGHNITEFQQR.[F]	[N4]	Q96HE7 [277-287]	0.001514	0	2	0.681896	206.9	141.575	3.485	High	0	0.000903319
High	[K].WTGHNVTVVQR.[T]	[N5]	Q07954 [1507-1517]	0.000447674	0	1	1.12644	128.075	145.25	3.41	High	0	0.000228855
High	[K].YAESDPTVPCNETR.[W]	[N11]	Q14703 [138-151]	0.0352935	0.00220844	1	0.95511	204.275	195.725	2.2675	High	0.0017815	0.0270293
High	[K].YHVLHINTTK.[N]	[N7]	Q7LGA3 [102-111]	0.003705	0	1	0.577617	253.45	146.55	1.9825	High	0	0.00236578
High	[K].YIHQNYTK.[A]	[N5]	Q02809 [534-541]	0.00994294	0.000732815	1	0.911577	93.7	92	2.35	High	0.0005745	0.006523
High	[K].YPDVQNECRPCHENCTQGCK.[G]	[N6; N14]	P21860 [603-622]	0.0586089	0.00330116	1.5	1.01885	197.5	202.5	1.505	High	0.0042145	0.065405
High	[K].YRPENSVANDTGFTVVAPGK.[E]	[N9]	O60911 [213-232]	0.000313984	0	2.5	0.711491	233.4	166.6	2.425	High	0	0.00021365
High	[K].YSVANDTGFVDIPK.[Q]	[N5]	P07711 [217-230]	0.0225913	0.000796097	1	0.817884	219.533	180.467	1.99	High	0.000615667	0.0168771
High	[K].YTGNASALFILPDQDK.[M]	[N4]	P01011 [268-283]	0.0690498	0.00276481	1	1.64474	151.3	248.7	1.86	High	0.002605	0.0548
High	[K].YVINGTYANETK.[L]	[N4; N9]	Q6PCB8 [210-221]	6.01086e-05	0	1	0.833333	218.2	181.8	2.23	High	0	2.739e-05
High	[R].AACAVKPQEVQMVNGTITNPINGK.[S]	[N14]	P11717 [2123-2146]	0.0320644	0.00060134	1	0.783699	224.3	175.7	1.85	High	0.0004654	0.02337
High	[R].AAGNTSESQSCAR.[S]	[N4]	Q86WC4 [132-144]	0.159836	0.00915548	1	1.24069	178.5	221.5	1.07	High	0.007387	0.1326
High	[R].AASNFTEIK.[N]	[N4]	Q92673 [1703-1711]	0.0812506	0.00422765	1	1.88679	51.475	97.325	1.59	High	0.00348142	0.0656075
High	[R].ACTENNECCHPECLGSCSAPDNDTACVACR.[H]	[N22]	P08069 [223-252]	0.00203382	0	1	0.494438	265.75	134.25	3.34833	High	0	0.00126763
High	[R].AEPPLNASASDQGEK.[V]	[N6]	Q9Y4L1 [926-940]	1.89248e-05	0	4	1.12613	98.375	112.075	3.275	High	0	1.46187e-05
High	[R].AGPNGTLFVADAYK.[G]	[N4]	Q9HDC9 [157-170]	0.000151311	0	4	1.12613	187.725	212.275	2.885	High	0	7.12369e-05
High	[R].ALDPAGNESAYPPNGVECYSCVGLSR.[E]	[N7]	O95274 [123-148]	0.00472966	0	1.14286	0.705787	231.943	168.057	2.22571	High	0	0.0031596
High	[R].ALGFENATQALGR.[A]	[N6]	Q08380 [64-76]	0.0198959	0.000921603	1.66667	1.08342	185.8	214.2	2.47	High	0.000868333	0.0154379
High	[R].ALPGGADNASVASGAAASPGPQR.[S]	[N8]	O95502 [35-57]	0.00209653	0	1.25	0.738144	230.125	169.875	3.6875	High	0	0.00137991
High	[R].ALQWNAGSGGLPENETTFAR.[I]	[N14]	P51689 [115-134]	0.0814126	0.00478503	1	0.515597	262.95	137.05	1.53	High	0.00386905	0.0667835
High	[R].ANHSGAVVLLK.[R]	[N2]	P23229 [322-332]	0.00179203	0	1	1.05042	194.975	205.025	3.2325	High	0	0.00105875
High	[R].ANQSWEDSNTDLVPAPAVR.[I]	[N2]	Q99988 [69-87]	8.29387e-05	0	1	0.74129	229.7	170.3	2.66	High	0	3.86e-05
High	[R].ANTSALAVPSPVSNSASAR.[H]	[N2]	P55268 [1347-1365]	0.00284377	0	1	0.532836	259.575	140.425	2.8475	High	0	0.00183595
High	[R].ANYTILK.[G]	[N2]	Q02487 [391-397]	0.0354335	0.00238829	1	1.49701	160.2	239.8	1.95	High	0.001847	0.0264
High	[R].AQPGTMSNGTETR.[G]	[N8]	Q9UGT4 [487-499]	0.00803732	0.0001377	2	1.09938	173.56	188.88	2.672	High	0.00036646	0.00770804
High	[R].ATNSTATPSSTLGTTR.[I]	[N3]	Q9HC84 [4802-4817]	0.00192735	0.000172125	1.25	0.862999	213.35	186.65	2.945	High	0.000131925	0.00114619
High	[R].ATNSTYLNEK.[S]	[N3]	P61647 [64-73]	0.0230569	0.000941693	1	0.854457	215.467	184.533	2.23	High	0.000731333	0.0180725
High	[R].CAPVNISCYAK.[F]	[N5]	Q8WWI5 [176-186]	0.154898	0.00937742	1	1.13122	187.35	212.65	0.98	High	0.00751	0.12605
High	[R].CDQCEENYFYNR.[S]	[N11]	P11047 [1012-1023]	0.00842128	0.000172125	2.25	1.0923	163.075	175.375	2.415	High	0.000248275	0.0134945
High	[R].CDVCAEGFTGFPSCYPTPSSSNDTR.[E]	[N22]	O15230 [458-482]	0.0234966	0.000921603	1	1.50678	153.867	246.133	2.85333	High	0.000868333	0.0185582
High	[R].CEICAPGFYGNALLPGNCTR.[C]	[N17]	O15230 [2003-2022]	0.0172599	0.000769197	1	0.714796	231.8	168.2	1.9025	High	0.000593675	0.012319
High	[R].CLYGEAYPACSPGNTSTAEEELCR.[L]	[N14]	O76024 [733-756]	0.00019354	0	1	0.847458	215.533	184.467	3.14	High	0	0.000102616
High	[R].CNGSGTYVCGLCECSPGYLGTR.[C]	[N2]	P18084 [476-497]	6.76819e-05	0	1.25	0.900901	210.1	189.9	4.1475	High	0	2.94263e-05
High	[R].CPMAGISHTAWHSNR.[T]	[N14]	Q9UMR5 [276-290]	9.12892e-06	0	1	0.764965	193.975	147.5	4.225	High	0	3.70461e-06
High	[R].CPNGTCIPSSK.[H]	[N3]	Q92673 [1244-1254]	0.0209157	0.00111262	1.25	1.20846	150.85	185.925	2.01	High	0.00085475	0.0154218
High	[R].CRPGSFGNATGSR.[G]	[N8]	Q7Z7M0 [1194-1206]	0.000571161	0	1	0.661813	240.7	159.3	1.47	High	0	0.0002697
High	[R].DAGVGFPEYQEEDNSTYNFR.[W]	[N14]	P11717 [734-753]	0.0401953	0.0015068	1.8	1.52439	156.72	243.28	3.326	High	0.0013346	0.0324572
High	[R].DAGVVCTNETR.[S]	[N8]	Q08380 [118-128]	0.00831532	0.000172125	1.5	1.82149	141.35	258.65	2.2525	High	0.000131925	0.0055663
High	[R].DCVLQCEEQNCSGGALNHFR.[S]	[N10]	Q96FM1 [31-50]	0.00546385	0.0001377	1	1.51469	132.62	197.46	2.84	High	0.00010554	0.00367763
High	[R].DCVSNGSLGCPVR.[L]	[N5]	Q9HCN3 [228-240]	0.000510157	0	1.25	1.36101	141.15	188.55	2.8025	High	0	0.000280136
High	[R].DDAGNYTCIASNGPQGQIR.[A]	[N5]	Q13308 [563-581]	0.00641725	0	1.85714	0.989679	200.557	199.443	2.99714	High	0	0.00428104
High	[R].DFQHLLNR.[T]	[N7]	Q13444 [231-238]	0.0453743	0.00218101	1	0.844595	216.85	183.15	2.425	High	0.001678	0.03362
High	[R].DGTPLSDGQSNHTVSSK.[E]	[N11]	Q13308 [165-181]	5.36412e-06	0	1	1.63399	151.5	248.5	2.94	High	0	1.9226e-06
High	[R].DHHGANFSCR.[T]	[N6]	P05362 [178-187]	0.00350826	0	1	1.35318	169.7	230.3	2.9325	High	0	0.00216825
High	[R].DHPNATVWR.[K]	[N4]	Q9UMR5 [203-211]	0.00614434	0.000385177	2.5	0.913242	192.625	177.75	2.4525	High	0.00030295	0.00382675
High	[R].DHVHCLGNR.[T]	[N8]	Q9BRN9 [162-170]	0.0255542	0.000866551	1	0.783699	224.125	175.875	1.9575	High	0.0006658	0.0183792
High	[R].DINSQQELQNITTDTR.[F]	[N10]	P10586 [957-972]	0.00877582	0.000381948	1.83333	0.994036	200.217	199.783	3.445	High	0.000288167	0.00676999
High	[R].DIYTFDGALNK.[S]	[N10]	Q08722 [64-74]	0.00897227	0	1.5	1.58856	153.8	246.2	1.87	High	0.0007575	0.01455
High	[R].DLASSENGTECR.[S]	[N7]	O95196 [349-360]	0.00253627	0	1.25	0.57554	253.65	146.35	2.28	High	0	0.00446748
High	[R].DLGPTLANSTHHNVR.[L]	[N8]	P04062 [302-316]	0.000201568	0	1	0.700771	234	166	2.71	High	0	0.000104709
High	[R].DLQANDTGR.[Y]	[N5]	P32004 [486-494]	0.0732497	0.00282508	1	0.668003	239.8	160.2	1.31	High	0.002194	0.05819
High	[R].DMNQTLGDNITVK.[M]	[N9]	Q8TCT8 [147-159]	0.00360051	7.51675e-05	2	1.53817	145.062	222.488	2.7975	High	0.000267763	0.00689364
High	[R].DNATLQATLHAAR.[D]	[N2]	O15230 [2422-2434]	0.000101797	0	1.5	1.07296	176.775	190.475	4.4425	High	0	4.63826e-05
High	[R].DNHTHSDIQVK.[L]	[N2]	Q8IV08 [386-396]	0.12003	0.00620802	1	1.15875	185.2	214.8	1.745	High	0.005368	0.09694
High	[R].DPCSNVTCSFGSTCAR.[S]	[N5]	O00468 [246-261]	0.0149621	0.000150335	1	0.948092	204.15	195.85	3.2525	High	0.00011635	0.0114863
High	[R].DPYCAWSVNTSR.[C]	[N9]	Q9C0C4 [514-525]	0.0197177	0.00132133	1	0.470699	271.9	128.1	1.46	High	0.00102135	0.01355
High	[R].DSEAFCHANCSGPAPAAKPDPDGGR.[A]	[N9]	Q92791 [71-95]	0.000537161	0	1	0.873108	213.533	186.467	2.45667	High	0	0.000309332
High	[R].DVMQVANTTMSSR.[S]	[N7]	P08069 [741-753]	0.0269932	0.000921603	2	0.441891	277.133	122.867	2.43	High	0.000868333	0.0217783
High	[R].DVNCSVMGPQEK.[K]	[N3]	P53634 [51-62]	0.00903313	0	1.25	1.01523	196.625	203.375	2.29	High	0	0.00632638
High	[R].EACQGTSPPVVSCYNASDHVYK.[G]	[N15]	O95274 [149-170]	0.020606	0.000921603	3	1.19142	181.9	218.1	3.47333	High	0.000868333	0.0161392
High	[R].EADNHTAFIR.[I]	[N4]	Q92545 [287-296]	0.000933415	0	4.25	0.705965	234.375	165.625	3.025	High	0.000171025	0.00146447
High	[R].EAGNHTSGAGLVQINK.[S]	[N4]	P20645 [80-95]	0.0172247	0.000690662	1	1.01895	166.04	173.86	3.508	High	0.00062654	0.0131366
High	[R].EAINITLDHK.[C]	[N4]	O00469 [206-215]	0.0203483	0.00132133	1	0.754717	227.95	172.05	1.99	High	0.00102135	0.014482
High	[R].EASIVGENETYPR.[A]	[N8]	Q9UBV2 [601-613]	0.000166464	0	2.5	1.02775	145.35	150.575	2.81	High	0	0.000306627
High	[R].EEAMLYHNQTAELR.[E]	[N8]	Q92791 [354-367]	0.0720722	0.00414267	1	1.11514	187.875	212.125	1.0475	High	0.00339877	0.0588475
High	[R].EEQFNSTYR.[V]	[N5]	P01861 [173-181]	0.057267	0.00060134	2	1.04058	196	204	1.32	High	0.003317	0.08205
High	[R].EERPLNASALK.[L]	[N6]	O14657 [59-69]	0.0270522	0.000878395	1	1.34907	144.775	192.775	2.2275	High	0.000680425	0.020256
High	[R].EETLLYDSNTSSMADR.[K]	[N9]	Q9UIQ6 [440-455]	0.00122186	0	1.875	1.1549	185.15	214.85	2.67	High	0.000143625	0.0038357
High	[R].EGICNGFTALCPASDPKPNFTDCNR.[H]	[N19]	O14672 [533-557]	0.0611272	0.00291364	1	0.836587	214.867	185.133	1.62	High	0.00234727	0.0468877
High	[R].ELAVPDGYTNR.[T]	[N10]	P26006 [77-87]	0.056354	0.00287682	1	1.06157	193.5	206.5	1.88	High	0.0024907	0.0465463
High	[R].ELQGNCSR.[L]	[N5]	Q07954 [110-117]	0.0718659	0.00276481	1	1.8797	138.9	261.1	1.45	High	0.002605	0.05735
High	[R].ELYNGTADITLR.[F]	[N4]	Q92508 [2291-2302]	0.0178917	0.000796097	1	1.50905	90.6	130.233	1.98	High	0.000615667	0.0136193
High	[R].ENATVPENEEEIIR.[K]	[N2]	Q8IWB1 [26-39]	0.0016655	0.000172125	3.5	1.06724	171.375	183.925	3.1925	High	0.000131925	0.00315721
High	[R].ENVGIYNLSK.[G]	[N7]	Q5JPE7 [612-621]	0.0107134	0.000572922	1	0.930233	206.65	193.35	2.35	High	0.00043225	0.00805866
High	[R].EQINITLDHR.[C]	[N4]	Q02809 [194-203]	0.00143937	0	1	0.523697	164.25	100.25	2.865	High	0	0.000871902
High	[R].EQQLESCACNETDNSCK.[V]	[N10]	P78536 [585-601]	5.65627e-05	0	1.25	1.6632	149.7	250.3	4.4025	High	0	3.01344e-05
High	[R].ERPPTFLTPEGNASNK.[E]	[N12]	Q92823 [265-280]	0.00124532	0	1.33333	0.808843	221.1	178.9	3.25	High	0	0.0007357
High	[R].ESWGQESNAGNQTVVR.[V]	[N11]	Q9NY97 [163-178]	3.73487e-06	0	2.5	0.742528	229.4	170.6	3.2875	High	0	3.6073e-06
High	[R].ETCSGNSSQCAPNIHK.[M]	[N6]	Q9P0K1 [514-529]	0.029647	0.0006885	1	0.96432	203.6	196.4	1.66	High	0.0005277	0.02034
High	[R].FGTCSQLCNNTK.[G]	[N9]	Q07954 [3831-3842]	0.0066198	0.000538533	1.75	1.56311	137.15	214.175	2.475	High	0.000419175	0.00441098
High	[R].FINYNQTVSR.[M]	[N5]	Q8N766 [909-918]	0.000148941	0	1.5	0.939408	163.75	155.825	2.755	High	0	7.15088e-05
High	[R].FNHTQTIQQK.[Q]	[N2]	Q92823 [222-231]	0.0541636	0.00257406	1	0.737463	230.1	169.9	1.72	High	0.002425	0.0450364
High	[R].FNPNISWQPIPVHTVPITEDR.[L]	[N4]	P11117 [130-150]	0.0565692	0.00348841	1	0.94162	204.5	195.5	1.85333	High	0.002781	0.0426267
High	[R].FNSTEYQVVTR.[V]	[N2]	Q07954 [445-455]	0.0642977	0.00392574	1.25	1.23001	117.275	133.725	1.8475	High	0.0031085	0.051105
High	[R].FNVSLDSVPELR.[W]	[N2]	Q02083 [36-47]	0.0711311	0.00413799	1	0.727273	231.6	168.4	0.7	High	0.003142	0.05279
High	[R].FQVNNTRPPHVQLLR.[K]	[N4]	P35475 [369-383]	0.00324373	0	1.33333	0.607042	248.633	151.367	2.39667	High	0	0.00207268
High	[R].FSGVNDTDFR.[V]	[N5]	Q9UKY4 [579-588]	0.0204746	0.000990482	1	1.05597	166.6	175.325	1.6375	High	0.00076325	0.0142348
High	[R].FTFTSHTPGDHQICLHSNSTR.[M]	[N18]	Q7Z7H5 [100-120]	0.0857814	0.00276481	1	0.449236	276	124	1.91	High	0.002605	0.06959
High	[R].GANDSTSAMPEQMK.[F]	[N3]	O95084 [205-218]	0.0179529	0.000691202	1.25	1.16043	184.95	215.05	1.7375	High	0.00065125	0.0136314
High	[R].GDKNVTMGQSSAR.[M]	[N4]	P48960 [368-380]	0.0132403	0.000494856	2	1.07383	173.15	189.463	2.9675	High	0.000497	0.0111113
High	[R].GFQWVTGDNNTSYSR.[W]	[N9] Or [N10]	P07204 [107-121]	0.0335313	0.00172665	2	1.67364	146.35	253.65	1.655	High	0.00156635	0.025562
High	[R].GGGDPWTNGSGLALCQR.[Y]	[N8]	Q9GZU1 [152-168]	6.23296e-05	0	2	0.821693	218.133	181.867	3.14333	High	0	5.76017e-05
High	[R].GHCWGPGPTQCVNCSQFLR.[G]	[N13]	P04626 [518-536]	0.000147322	0	1	0.779575	224.4	175.6	4.0775	High	0	6.95876e-05
High	[R].GHPQILEAAGNASAGTVLLR.[W]	[N11]	Q13332 [930-949]	0.00372107	0	1	0.612557	245.95	154.05	1.985	High	0	0.00245994
High	[R].GHTLTLNFTR.[N]	[N7]	P11279 [97-106]	0.000345639	0	2.75	0.79984	193.4	155.875	3.0925	High	0	0.000789825
High	[R].GICNSSDVR.[G]	[N4]	O75882 [297-305]	0.0806742	0.00409751	1	1.32319	171.65	228.35	1.415	High	0.00356278	0.0643232
High	[R].GNHTQSALLAGLR.[K]	[N2]	Q7Z5N4 [1332-1344]	0.006065	0	2	0.854336	137.35	120.45	1.84	High	0	0.005858
High	[R].GNITEYQCHQYITK.[M]	[N2]	Q92896 [209-222]	0.110766	0.00882339	1	2.43902	116.2	283.8	1.71	High	0.006823	0.09093
High	[R].GNVTQHVQGHR.[N]	[N2]	Q15043 [76-86]	0.000180475	0	2.5	0.780793	103.675	79.925	3.485	High	0	0.00021205
High	[R].GPECSQNYTTPSGVIK.[S]	[N7]	O14786 [144-159]	0.000126357	0	2	1.29032	174.65	225.35	3.635	High	0	5.8189e-05
High	[R].GSEGGNGSNPVAGLETDDHGGK.[A]	[N6]	Q8TBP5 [78-99]	0.054014	0.00195642	1	0.685683	235.58	164.42	1.678	High	0.00169196	0.0417334
High	[R].GSSVILNCSAYSEPSPK.[I]	[N7]	Q92859 [67-83]	0.0391154	0.00197373	1	0.779423	224.8	175.2	1.68	High	0.001509	0.02748
High	[R].GVFITNETGQPLIGK.[V]	[N6]	P10253 [465-479]	0.00424357	0.00034425	2	1.45985	90.8	134.7	2.54	High	0.00026385	0.00257515
High	[R].GVYELTHNNK.[T]	[N9]	Q7Z388 [115-124]	0.0404824	0.00175679	1	1.08873	190.05	209.95	2.16	High	0.00136085	0.031376
High	[R].GWSCTDNSTAQTVAQQR.[A]	[N7]	Q9HCN3 [529-545]	0.000920858	0	1.75	0.841574	216.7	183.3	2.3375	High	0	0.000498463
High	[R].GYQGDGISHCNR.[T]	[N11]	Q7Z7M0 [1105-1116]	0.000383026	0	1	0.525417	260.8	139.2	3.2725	High	0	0.000214785
High	[R].GYYNQSEAGSHTIQR.[M]	[N4]	Q95604 [107-121]	3.71997e-06	0	2	1.00908	198.975	201.025	3.3475	High	0	1.28466e-06
High	[R].GYYNQSEAGSHTVQR.[M]	[N4]	P01892 [107-121]	0.0109433	0.000572922	1	1.08755	155.7	169.125	3.1925	High	0.00043225	0.00826268
High	[R].HEEGHMLNCTCFGQGR.[G]	[N8]	P02751 [535-550]	0.0770775	0.00376821	1	0.962001	203.95	196.05	1.065	High	0.0033485	0.062545
High	[R].HFNDSGACVPR.[C]	[N3]	P21860 [248-258]	0.00013931	0	1	0.720461	193.7	139.375	3.43	High	0	6.72965e-05
High	[R].HLELAGENPSSDINCTK.[V]	[N14]	Q02742 [45-61]	0.035726	0.000586415	1.5	0.734484	230.5	169.5	1.805	High	0.00045155	0.027611
High	[R].HLNSTDDADR.[I]	[N3]	Q9Y2G5 [257-266]	0.0402138	0.0015022	1.25	0.778059	187.475	142.15	2.3725	High	0.00127828	0.030562
High	[R].HPGNFSSLSCDYFAVNQSR.[L]	[N4; N16]	P08648 [709-727]	0.0209128	0.00034425	1	0.700525	235.05	164.95	1.49	High	0.00026385	0.01436
High	[R].HPVNECAPYQR.[S]	[N4]	Q3MIR4 [142-152]	0.0101099	0	2	0.522375	262.433	137.567	1.88333	High	0	0.00688275
High	[R].HRPTAGAFNHSDLDAELR.[R]	[N9]	P09758 [160-177]	0.00360341	0.000366408	1.5	0.810866	187.95	151.175	1.97	High	0.00028725	0.00226785
High	[R].HVVYWNSSNPR.[L]	[N6]	P52798 [28-38]	0.00282233	0	1	0.568289	254.9	145.1	2.57333	High	0	0.00171363
High	[R].IAPASNVSHTVVLRPLK.[A]	[N6]	P43308 [83-99]	0.00398769	0	2.25	0.8	152.775	118.45	2.2	High	0	0.00269045
High	[R].ICPQGYTCCTSEMEENLANR.[S]	[N19]	P35052 [61-80]	0.038117	0.00060134	1	0.231535	324.8	75.2	0.82	High	0.0004654	0.02826
High	[R].IETILLNGTDR.[K]	[N7]	Q07954 [723-733]	0.045372	0.00177344	1	1.25576	176.967	223.033	1.35667	High	0.00152847	0.0344767
High	[R].IEVANLNGTSR.[K]	[N7]	O75197 [132-142]	0.0630869	0.00194006	2.33333	1.00739	199.233	200.767	1.82333	High	0.0026069	0.06079
High	[R].IFENADNGTTVIR.[L]	[N7]	Q9UN73 [251-263]	0.00897372	0.000172125	1	0.519548	263.175	136.825	1.565	High	0.000131925	0.00595682
High	[R].IHNVTASDSGK.[Y]	[N3]	O00478 [113-123]	0.0015529	0	1	0.895656	211	189	2.045	High	0	0.000865
High	[R].ILAPELSHANATR.[N]	[N10]	P51168 [126-138]	0.000329672	0	1	0.611247	79.1	48.3	3.02	High	0	0.0001572
High	[R].ILCDNADNITR.[V]	[N8]	Q92626 [1273-1283]	0.0408391	0.00060134	1	0.917431	208.6	191.4	1.55	High	0.0004654	0.03035
High	[R].INTTADEKDPTNPFR.[F]	[N2]	O14672 [277-291]	0.00564491	0.000385177	1	1.52788	103.35	162.975	2.085	High	0.00030295	0.00363521
High	[R].IVCVTSPAPNGTTGPVR.[V]	[N10]	Q9ULL4 [891-907]	0.0322305	0.00126247	1	0.638298	244.067	155.933	1.55667	High	0.000989	0.025524
High	[R].IVSPEPGGAVGPNLTCR.[W]	[N13]	Q6UXD5 [361-377]	0.0236456	0.00123292	1.71429	0.888776	210.257	189.743	2.11286	High	0.00123159	0.020356
High	[R].KDNTTVTR.[L]	[N3]	P11279 [247-254]	0.0744458	0.00328546	2	1.51229	102.125	144.375	1.8175	High	0.00475875	0.0880375
High	[R].KENSSEICSNNGECVCGQCVCR.[K]	[N3]	P05556 [518-539]	0.000181559	0	2.3	1.12587	183.34	216.66	3.909	High	0	0.000390061
High	[R].KGFCEAPGNR.[T]	[N9]	P27701 [190-199]	0.0111404	0	2	2.1097	128.7	271.3	1.87	High	0	0.007237
High	[R].KNASNMEYR.[I]	[N2]	Q9Y639 [196-204]	0.0290283	0.00151492	1.16667	1.60471	109.517	170.9	2.80833	High	0.0011449	0.0221228
High	[R].KNISIHQAYQQCK.[E]	[N2]	Q8N271 [539-551]	0.011316	0	1	1.03306	196.8	203.2	1.35	High	0	0.007613
High	[R].KNITDLVEGAK.[K]	[N2]	Q8IWA5 [199-209]	0.000789883	0	1	0.876616	212.175	187.825	4.2575	High	0	0.000447751
High	[R].KNNTYLVK.[R]	[N2]	Q6P4E1 [149-156]	0.0474246	0.00258386	1.5	0.824742	218.8	181.2	1.57	High	0.00233687	0.0401727
High	[R].KNYNNTWTR.[L]	[N4]	O75054 [652-660]	0.0357635	0.00146823	1.33333	1.15252	106	115.3	2.23667	High	0.0011339	0.0271973
High	[R].KTNESVSEPR.[K]	[N3]	Q13433 [239-248]	0.00169932	0	1	0.777303	220.75	179.25	3.185	High	0	0.0009643
High	[R].LANLTQGEDQYYLR.[V]	[N3]	P10909 [372-385]	0.000206543	0	2.5	1.31105	173.025	226.975	3.0825	High	0	0.000114082
High	[R].LCDEGHGLEVEINCTR.[T]	[N13]	P25445 [106-121]	0.00634988	0.0002295	3	0.61792	247.233	152.767	2.09	High	0.0001759	0.003954
High	[R].LENITTGTYTIHAQK.[E]	[N3]	Q5JPE7 [367-381]	0.142075	0.00923471	1	1.06383	193.8	206.2	1.7	High	0.007353	0.1124
High	[R].LFNVTPQDEQK.[F]	[N3]	O75144 [100-110]	0.00693384	0.000172125	1	1.04575	195.525	204.475	2.435	High	0.000131925	0.00446718
High	[R].LFPNASQHITPSYNYAPNPDK.[H]	[N4]	Q8IWU5 [238-258]	0.079937	0.0043972	1	1.7316	55.55	96.1	1.515	High	0.003801	0.066015
High	[R].LGQAPANWYNDTYPLSPPQR.[T]	[N10]	Q8WVQ1 [79-98]	0.13794	0.00740492	1	0.642674	243.5	156.5	0.81	High	0.006514	0.1179
High	[R].LHEITNETFR.[G]	[N6]	Q6EMK4 [112-121]	0.179655	0.00987406	1	0.621118	246.8	153.2	1.36	High	0.007932	0.1508
High	[R].LLANSSMLGEGQVLR.[S]	[N4]	Q6UXD5 [244-258]	0.0144069	0.00146563	1	0.762195	227	173	1.3	High	0.001149	0.01
High	[R].LLNCTAPGPDAAAR.[C]	[N3]	Q8N697 [138-151]	5.08601e-05	0	1	0.727008	231.45	168.55	2.87	High	0	2.1671e-05
High	[R].LNAINITSALDR.[G]	[N5]	O43556 [196-207]	0.104678	0.0085221	1	0.720461	232.5	167.5	1.14	High	0.006606	0.08556
High	[R].LNASIADLQSQLR.[S]	[N2]	O15230 [2208-2220]	0.0051306	0	2.25	0.962232	203.725	196.275	2.5575	High	0.00043225	0.00943423
High	[R].LNGTDPIVAADSK.[R]	[N2]	Q07954 [4074-4086]	0.0250095	0.0011511	1.33333	1.45278	160.5	239.5	1.79	High	0.00104423	0.0190281
High	[R].LNPTVTYGNDSFSAK.[A]	[N9]	P05362 [259-273]	0.000141162	0	1.75	1.97922	134	266	3.5825	High	0	0.000277411
High	[R].LNTTGVSAGCTADLLVGR.[A]	[N2]	O15230 [3106-3123]	0.00675485	0	1	0.547046	257.333	142.667	1.57667	High	0	0.0044712
High	[R].LPNNHSTASPLGMPHGAAAFVDTCSGDK.[M]	[N4]	Q14573 [2402-2429]	0.000166051	0	1	0.898473	210.7	189.3	1.93	High	0	8.141e-05
High	[R].LSQAQGNLSVLETR.[Q]	[N7]	O75054 [819-832]	0.0154049	0.000770735	1.25	1.02067	196.375	203.625	2.2	High	0.00058875	0.0110518
High	[R].LTIVNSSVLDRPR.[A]	[N5]	Q92673 [867-879]	5.3198e-05	0	1	0.918105	205.76	194.24	4.436	High	0	2.27134e-05
High	[R].LYANHTSLPASAR.[E]	[N4]	Q9NRB3 [277-289]	0.000849716	0	1	0.56164	256.1	143.9	2.155	High	0	0.0004713
High	[R].MDPPCTNTTAASTYLNNPYVR.[K]	[N7]	P10619 [327-347]	3.67721e-05	0	1.33333	1.10375	188.267	211.733	4.06889	High	0	1.743e-05
High	[R].MSVINFECNK.[T]	[N9]	P11717 [427-436]	0.0233976	0.00195417	1	1.23153	179.2	220.8	1.69	High	0.001515	0.0169
High	[R].NASHLVCSACFGPCAR.[C]	[N1]	Q96HD1 [205-220]	2.79274e-06	0	1.25	0.741977	229.475	170.525	4.0025	High	0	8.61374e-07
High	[R].NCSAAPQPEPAAGLASYPELR.[L]	[N1]	O75718 [87-107]	2.08642e-05	0	1	0.981354	201.65	198.35	3.89	High	0	7.9315e-06
High	[R].NCSFEDDNIR.[S]	[N1]	Q4G148 [387-396]	0.0232281	0.00108702	1.5	0.741381	229.55	170.45	2.13167	High	0.000913833	0.0179693
High	[R].NCSTITLQNITR.[G]	[N1; N9]	Q14118 [641-652]	0.000304447	0	2.25	0.59356	218	130.7	3.095	High	0.000131925	0.0015035
High	[R].NDTASYK.[C]	[N1]	P06731 [208-214]	0.0883941	0.00405792	1.33333	0.825309	199.2	164.6	2.18	High	0.003389	0.0708733
High	[R].NDTLQEAK.[E]	[N1]	Q92896 [786-793]	1.91028e-05	0	1.33333	2.38854	66.9667	143.833	3.48667	High	0	8.47778e-06
High	[R].NETHSICTACDESCK.[T]	[N1]	Q6UXH1 [190-204]	0.0149465	0.000697799	1.57143	1.11129	154.829	168.329	1.85571	High	0.000535857	0.0111074
High	[R].NFSTCSPSTK.[T]	[N1]	P07949 [554-563]	0.0110972	0.000172125	1.5	0.835596	148.975	124.175	2.365	High	0.000131925	0.00798818
High	[R].NGSSIVDLSPLIHR.[T]	[N1]	P11717 [1656-1669]	5.97116e-05	0	1	0.883132	211.967	188.033	3.91667	High	0	2.48507e-05
High	[R].NHSCSEGQISIFR.[Y]	[N1]	O75882 [731-743]	0.000352933	0	1.33333	0.82282	219.167	180.833	3.96667	High	0	0.00018201
High	[R].NHSIFLADINQER.[G]	[N1]	P50897 [197-209]	0.0211258	0.00132046	3.6	0.862218	214.66	185.34	3.71	High	0.00108	0.0162545
High	[R].NHTWLPVSDDACYR.[E]	[N1]	P15529 [83-96]	0.00285058	0	1.25	0.704101	232.425	167.575	2.27	High	0	0.00174455
High	[R].NISQVLEK.[K]	[N1]	O14672 [439-446]	0.00327466	0.0002295	1	1.67224	149.6	250.4	2.30333	High	0.0001759	0.00195143
High	[R].NITAQLPTK.[G]	[N1]	Q04771 [102-110]	0.0161654	0.00064492	1	0.768935	226.15	173.85	2.17	High	0.00049655	0.0112625
High	[R].NLHQSNTSR.[A]	[N6]	P98160 [1750-1758]	0.0246347	0.000878395	1.25	0.861698	185.8	159.3	2.1875	High	0.000680425	0.018193
High	[R].NLSAPVTLNLR.[D]	[N1]	O00754 [930-940]	0.0979745	0.00750259	1	0.944287	205.8	194.2	0.99	High	0.005814	0.07989
High	[R].NLSVDGK.[N]	[N1]	Q9NYQ6 [1623-1629]	0.0713393	0.00336167	1.5	1.46413	70	101.3	2.085	High	0.0027915	0.057195
High	[R].NLTEVPTDLPAYVR.[N]	[N1]	Q13641 [81-94]	0.0414646	0.00221678	1.25	0.560695	248.35	151.65	2.1275	High	0.001902	0.0356806
High	[R].NLTQPEVIIQPSSR.[H]	[N1]	Q8N0Z9 [347-360]	3.36482e-05	0	2.33333	0.219106	327.967	72.0333	3.35667	High	0	1.43727e-05
High	[R].NNSNNFDLNR.[N]	[N1]	O75976 [626-635]	0.0914453	0.0061965	1	1.27065	176.2	223.8	1.69	High	0.004675	0.06914
High	[R].NPCTSEQNCTSPFSYK.[N]	[N8]	P05556 [205-220]	0.00283143	0	1.5	1.67457	148.067	251.933	3.3	High	0	0.00189698
High	[R].NPNGTVTVISR.[Y]	[N3]	Q15223 [200-210]	0.0664454	0.00284389	1.33333	0.849137	164.7	139.033	1.99	High	0.00445733	0.0725783
High	[R].NQNESVSEIGGK.[I]	[N3]	Q68CR1 [525-536]	0.00552422	0	1	1.21951	180.2	219.8	2.47	High	0	0.003525
High	[R].NQSLVQDMDSMVR.[L]	[N1]	Q8NHP8 [465-477]	0.00376125	0.000172125	1.75	0.592066	249.125	150.875	2.9375	High	0.000131925	0.0023421
High	[R].NSSHSPLR.[T]	[N1]	Q92854 [191-198]	0.000221058	0	2	0.814775	220.3	179.7	2.80667	High	0	0.000175212
High	[R].NSTIEAANLAGLK.[I]	[N1]	P48723 [184-196]	0.158139	0.00886713	1	0.548847	258.3	141.7	1.16	High	0.007608	0.1368
High	[R].NTNENPQECFNASK.[L]	[N11]	Q13433 [256-269]	0.00661366	0	1.6	0.779545	224.22	175.78	2.668	High	0	0.00750904
High	[R].NTSAASTAQLVEATEELR.[R]	[N1]	P55268 [1249-1266]	0.0347818	0.00179283	1	0.614817	247.5	152.5	1.49	High	0.001366	0.02545
High	[R].NTSWDNAGFK.[G]	[N1]	P78536 [264-273]	6.12517e-05	0	2	0.925926	207.7	192.3	2.62	High	0	0.003035
High	[R].NTTEVVNTMCGYK.[T]	[N1]	O95858 [189-201]	0.00450775	0	1.5	1.28601	173.49	226.51	2.837	High	0	0.00310424
High	[R].NTTIFLK.[F]	[N1]	Q8NBN3 [62-68]	0.0838195	0.00412616	1	1.02197	109.8	106.125	2.3725	High	0.0034436	0.0673925
High	[R].NWTAAASPSAVFATR.[H]	[N1]	Q9NZV5 [190-204]	0.00160086	0	1.33333	0.764331	226.6	173.4	2.64667	High	0	0.000951737
High	[R].NYTAEEK.[I]	[N1]	P22303 [495-501]	0.123023	0.00667647	1	1.56986	154.967	245.033	2.03333	High	0.00552767	0.10047
High	[R].QGEHLSNSTSAFSTR.[S]	[N7]	Q92626 [1362-1376]	0.00431757	0.000366408	1	1.32057	144.55	194.9	2.285	High	0.00028725	0.0028233
High	[R].QNQSLVYGK.[V]	[N2]	Q09328 [446-454]	0.0169867	0.00034425	1	0.940734	128.8	119.7	1.995	High	0.00026385	0.011671
High	[R].QTECMVEQYSNYSVNGEPVNGR.[H]	[N11]	P42892 [641-662]	0.0257599	0.000921603	1	0.764916	226.5	173.5	2.42667	High	0.000868333	0.0201493
High	[R].QTMIDFLQNHTEGSRPPACPR.[L]	[N9]	Q6ZRP7 [170-190]	0.134959	0.00629783	1	1.52905	158.2	241.8	1.58	High	0.005601	0.1105
High	[R].QTNPSAMEVEEDDPVPEIR.[R]	[N3]	P55072 [714-732]	0.00116899	0	1	0.801925	222	178	2.3	High	0	0.0006649
High	[R].QTPEYQNESSR.[N]	[N7]	P11117 [171-181]	0.10535	0.00521146	1	1.08382	191.833	208.167	1.71667	High	0.00441033	0.0858667
High	[R].QVLNITDK.[D]	[N4]	P22223 [563-570]	0.0273217	0.00107638	1.25	1.63934	125.4	204.375	1.7075	High	0.0009542	0.0206848
High	[R].QVQLECVVLNR.[T]	[N10]	O75054 [833-843]	0.0836071	0.00462511	1	1.24339	177.825	222.175	1.6725	High	0.0038265	0.0678218
High	[R].QVVENMTR.[A]	[N5]	P10253 [386-393]	0.093145	0.00568245	1	1.59236	107.15	159.95	1.49	High	0.0045465	0.07275
High	[R].RNESHLIDFR.[E]	[N2]	Q9UJ14 [197-206]	0.00968076	0.00146563	1	0.817661	220	180	2.57	High	0.001149	0.006502
High	[R].RNQSLSLLYK.[V]	[N2]	Q06481 [540-549]	0.00182083	0	1	1.10406	190	210	3.8875	High	0	0.00105106
High	[R].RPNQSQPLPPSSLQR.[F]	[N3]	Q92542 [415-429]	0.115423	0.00679628	1	1.44509	163.6	236.4	1.89	High	0.0054455	0.09443
High	[R].RPPLAELAALNLSGSR.[L]	[N11]	Q13641 [114-129]	0.000148224	0	1.66667	0.48528	263.7	136.3	2.96667	High	0	7.02727e-05
High	[R].RPYVSYVNNSIAR.[N]	[N8]	Q9Y2E5 [741-753]	0.00207754	0.000366408	1.25	0.825934	218.725	181.275	3.275	High	0.00028725	0.00138039
High	[R].SANSTLAQALHWTR.[S]	[N3]	Q9BU23 [614-627]	0.00220091	0	1.5	0.697837	235.55	164.45	2.335	High	0	0.0012645
High	[R].SDEYNCSSGMCIR.[S]	[N5]	Q92673 [1160-1172]	0.00702807	0	1	0.864553	214	186	2.34333	High	0	0.00484388
High	[R].SDFSQTMLFQANTTR.[I]	[N12]	P23470 [433-447]	0.0934868	0.005336	1	0.434405	277.25	122.75	1.43	High	0.0042845	0.076075
High	[R].SDLNPANGSYPFQALR.[Q]	[N7]	Q8NHP8 [509-524]	0.042007	0.00206203	1.5	1.19213	180.617	219.383	1.49333	High	0.00163983	0.0322459
High	[R].SEASEGNITVTCR.[A]	[N7]	Q29983 [214-226]	0.000329631	0	1.75	0.478469	217.125	111.025	2.5725	High	0	0.000176085
High	[R].SEQLVNFTGK.[A]	[N6]	Q9BVX2 [181-190]	0.0161268	0.00146563	1	0.913242	209.1	190.9	1.4	High	0.001149	0.01127
High	[R].SGEDESQEDVLMDEAPSNLSQASTLQANR.[E]	[N18]	Q7Z6Z7 [2372-2400]	0.000113661	0	1	0.923361	207.467	192.533	3.19333	High	0	5.3075e-05
High	[R].SGWTGEYCNCTTSTDSCVSEDGVLCSGR.[G]	[N9]	P18564 [567-594]	0.00174486	0	1	3.29489	91.45	308.55	2.605	High	0	0.00099465
High	[R].SLLEFNTTVSCDQQGTNHR.[V]	[N6]	P11717 [107-125]	0.0321764	0.00117119	1	0.873362	213.167	186.833	1.51	High	0.000907233	0.0239267
High	[R].SPIVTHCNVSTVNK.[G]	[N8]	Q9UN76 [167-180]	0.0112928	0.000150335	2	0.880863	176.675	156.975	2.355	High	0.00011635	0.0083323
High	[R].SQNDTVTPDVWYTSKPK.[E]	[N3]	Q9BTY2 [375-391]	0.00231069	0	1	1.11982	187.75	212.25	2.79	High	0	0.00134459
High	[R].SVNPNDTCLASCVK.[S]	[N5]	O95857 [133-146]	0.00110767	0	2.4	0.876424	209.3	190.7	3.376	High	0	0.000698507
High	[R].SVTSNQSDGTQESCESPDVLDR.[H]	[N5]	Q9UGV2 [346-367]	0.0142663	0.00146563	1	0.733676	230.7	169.3	1.92	High	0.001149	0.009885
High	[R].SVYNCSGEACR.[G]	[N4]	P54802 [500-510]	0.00333151	0	1	1.40944	117.1	165.7	2.14	High	0	0.001995
High	[R].TAADTTGLQPILNQFTPANISR.[Q]	[N19]	P06756 [597-618]	0.000145125	0	2	1.2012	172.85	227.15	3.205	High	0	7.35524e-05
High	[R].TANHSAPSLENSVQPGK.[R]	[N3]	Q9UJ14 [521-537]	3.31268e-06	0	1	1.5456	156.4	243.6	4.30667	High	0	1.24556e-06
High	[R].TASCSNVTCWLK.[D]	[N6]	P17301 [1052-1063]	0.0337005	0.00141254	2	1.55642	101.75	160.15	1.485	High	0.001097	0.0263376
High	[R].TCVSNCTASQFVCK.[N]	[N5]	Q07954 [3329-3342]	0.00598618	0.000172125	1.25	1.14188	186.675	213.325	2.465	High	0.000131925	0.003823
High	[R].TDCDSSTTSLCSFPVANVSLTK.[G]	[N17]	Q96G97 [72-93]	0.0572735	0.00328133	1	0.814553	217.1	182.9	1.69	High	0.00263823	0.046984
High	[R].TEKEPLSDPVGTCYLSTDNFTR.[I]	[N19]	P08648 [164-185]	0.046652	0.00137164	1	1.41309	165.3	234.7	1.59333	High	0.00106237	0.0350833
High	[R].TETTMSPLTNTTTSQGTTR.[C]	[N10]	Q9HC84 [1765-1783]	0.0159983	0.00107707	1	1.10558	189.5	210.5	1.9	High	0.00083835	0.010833
High	[R].TEVTQVNTTNCGR.[L]	[N7]	O95754 [503-515]	0.00314731	0	1	0.582751	252.7	147.3	1.88	High	0	0.001922
High	[R].TGEQFSFNTTAAQPQYFK.[Y]	[N8]	Q8NBJ9 [158-175]	0.0377427	0.00030067	2	1.46843	162	238	1.785	High	0.0002327	0.028015
High	[R].THNLTDLSPHLR.[Y]	[N3]	P32004 [977-988]	0.0462665	0.00243211	1.5	2.0377	92.875	179.375	2.07	High	0.00220835	0.0390035
High	[R].TILVDNNTWNNTHISR.[V]	[N6] Or [10]	P46977 [539-554]	0.0831021	0.00582534	1	1.06326	193.45	206.55	1.37	High	0.004616	0.06496
High	[R].TLNCSGGHVK.[L]	[N3]	Q9P0K1 [632-641]	0.0431851	0.00229169	1	1.10254	99.4	109.5	1.48	High	0.001729	0.03254
High	[R].TPEQGSNGTDGASQK.[T]	[N7]	Q12913 [98-112]	0.0212216	0.000986865	1	1.25392	173.1	226.9	1.98	High	0.0007545	0.0147905
High	[R].TPHATCFNGEDFDRPVVVSNCSCTR.[E]	[N20]	Q92673 [655-679]	0.0794628	0.00498203	1	1.09529	190.9	209.1	1.22	High	0.003867	0.06343
High	[R].TQDEILFSNSTR.[L]	[N9]	Q6YHK3 [110-121]	0.0321894	0.00144302	2	5.72082	58.5	341.5	2.91	High	0.00270668	0.046484
High	[R].TSIPTINMENK.[T]	[N10]	P26006 [960-970]	0.00489088	0.0002295	2	1.19665	181.3	218.7	2.13667	High	0.0001759	0.00326433
High	[R].TTLVDNNTWNNSHIALVGK.[A]	[N]	Q8TCJ2 [618-636]	7.3928e-05	0	1	1.0442	145.167	149.533	3.68333	High	0	3.1215e-05
High	[R].TVLENSTSYEEAK.[N]	[N5]	Q13510 [255-267]	0.00463094	0.000366408	1.5	1.64069	149.7	250.3	2.94	High	0.00028725	0.00313311
High	[R].VCEIHEDNSTR.[S]	[N8]	Q29983 [118-128]	0.00983372	0.000488543	1	0.738916	227.933	172.067	1.58667	High	0.000383	0.00660267
High	[R].VDEGEECDPGIMYLNNDTCCNSDCTLK.[E]	[N16]	P78536 [483-509]	0.0370466	0.00135563	3	1.37174	168.6	231.4	1.64	High	0.001035	0.02584
High	[R].VDNITDQFCNASVVDPACVR.[C]	[N3; N10]	O15118 [959-978]	0.00392521	0.000172125	1	0.660066	239.025	160.975	2.695	High	0.000131925	0.0024683
High	[R].VESGENCSSPAPR.[E]	[N6]	Q14643 [2507-2519]	0.00722039	0	2	2.31839	117.967	282.033	2.5	High	0	0.00515773
High	[R].VFGSQNLTTVK.[L]	[N6]	Q9Y4L1 [510-520]	0.011898	0.00032246	2.25	0.759013	139.3	122.75	3.1825	High	0.0034545	0.0615012
High	[R].VFPQVNVTK.[M]	[N6]	P54802 [256-264]	0.0431853	0.00127775	1.5	0.992556	200.75	199.25	1.61	High	0.0009902	0.032485
High	[R].VGNDTHCQPTK.[I]	[N3]	B0FP48 [138-148]	0.068538	0.00117283	1	2.42131	25.9	62.7	1.91	High	0.0009031	0.05318
High	[R].VGYQSQNISCFFR.[L]	[N7]	Q6NSJ0 [505-517]	0.0110741	0	1	0.737463	229.95	170.05	2.285	High	0	0.00784059
High	[R].VINQTTCENLLPQQITPR.[M]	[N3]	Q9Y5Y6 [770-787]	0.0015442	0.00028407	2.33333	0.7768	224.267	175.733	3.39667	High	0.000228033	0.00096498
High	[R].VISAGGNDSR.[S]	[N7]	Q58EX2 [571-580]	7.43576e-06	0	1.5	0.95648	204.45	195.55	3.92	High	0	2.7296e-06
High	[R].VIYNLTEK.[G]	[N4]	Q969V3 [425-432]	0.00444663	0.00028407	1.33333	1.25261	174.833	225.167	2.02	High	0.000228033	0.00279317
High	[R].VLEAVNGTDAR.[L]	[N6]	O60487 [34-44]	0.00482052	0	1.5	0.895656	168.175	150.1	2.1375	High	0	0.00308972
High	[R].VNASTTEPNSTVEQSALMR.[D]	[N2; N9]	P07942 [1335-1353]	0.000184033	0	2.11111	1.28995	174.2	225.8	2.87889	High	0	9.68908e-05
High	[R].VNITYNYPVR.[A]	[N2]	Q3MIR4 [285-294]	0.00669649	0.00085221	1	0.629327	245.5	154.5	1.94	High	0.0006841	0.004353
High	[R].VNLSAAPAPVSAVPTGLHSK.[M]	[N2]	O95502 [215-234]	0.000117111	0	1.5	1.05932	194.1	205.9	3.3075	High	0	5.25005e-05
High	[R].VNNTLSSQISR.[L]	[N2]	P11047 [1106-1116]	0.0605249	0.00305709	1.66667	1.396	124.333	175.367	1.68	High	0.00302733	0.0565133
High	[R].VNSTELFHVDR.[H]	[N2]	Q7Z7M0 [420-430]	0.0711651	0.00345479	1	0.670691	239.45	160.55	1.285	High	0.00261505	0.0539
High	[R].VPDAANLSSAWR.[N]	[N6]	O76082 [52-63]	0.0148315	0.000718043	1	0.71908	232.567	167.433	1.68	High	0.0005589	0.00993633
High	[R].VPPGDSPPGNGSGPR.[H]	[N10]	Q9BZR6 [363-377]	0.164975	0.00915548	1	1.13895	187	213	1.27	High	0.007387	0.1374
High	[R].VQGNSTLLHITDLQAR.[D]	[N4]	O75054 [98-113]	0.000679397	0	1	1.08932	190.1	209.9	3.625	High	0	0.000380288
High	[R].VQPFNVTQGK.[Y]	[N5]	P13473 [352-361]	0.00104853	0	3.25	1.02354	97.9	99.9	3.21	High	0	0.0010793
High	[R].VQQVGHYPPANSSLSSR.[S]	[N11]	Q24JP5 [61-77]	0.000250627	0	3	1.14123	185.85	214.15	3.565	High	0.00028725	0.00138016
High	[R].VTGLNCTTNHPINPK.[G]	[N5]	P08648 [864-878]	0.0283288	0.00060134	1	1.2837	42.3	54.3	2.12	High	0.0004654	0.02052
High	[R].VTPACNTSLPAQR.[W]	[N6]	Q9UBG0 [64-76]	0.0238553	0.000769197	1	1.95791	134.95	265.05	1.805	High	0.000593675	0.0168918
High	[R].VYGQNINNETWSR.[I]	[N]	Q9H8M5 [105-117]	0.0415108	0.00158678	2.25	0.62588	245.875	154.125	1.5925	High	0.00145575	0.0331165
High	[R].WCPQNSSCVNATACR.[C]	[N5; N10]	P48960 [29-43]	0.0210496	0.000879	1.5	1.60043	152.667	247.333	2.40667	High	0.00067325	0.0152298
High	[R].WLCDGDNDCGNSEDESNATCSAR.[T]	[N17]	Q07954 [912-934]	0.00125388	0	1	1.21017	179.667	220.333	2.76	High	0	0.000747683
High	[R].WWHQQTNATQEVVR.[D]	[N7]	O00754 [127-140]	7.91203e-06	0	1	0.878477	212.3	187.7	3.63333	High	0	2.96113e-06
High	[R].YAVYWNSSNPR.[F]	[N6]	P52803 [32-42]	0.00543475	0.000385177	2	0.68306	237.35	162.65	2.5225	High	0.00087345	0.0130292
High	[R].YENGCAYFHEEER.[E]	[N3]	Q6P996 [131-143]	0.116623	0.0058395	1	1.02881	120.3	122.7	1.67667	High	0.00489533	0.0957933
High	[R].YEQLQNETR.[Q]	[N6]	P11117 [162-170]	0.0152631	0.000660667	1.75	1.39909	119.1	163.325	1.965	High	0.000510675	0.0104417
High	[R].YGENNSLSVEGFR.[K]	[N4]	Q13433 [64-76]	0.0175284	0.000378008	2	0.721631	231.675	168.325	2.0425	High	0.00028705	0.0129353
High	[R].YHGFLNTSYHR.[Q]	[N6]	P11117 [87-97]	0.0620541	0.00276481	1	0.554939	257.2	142.8	1.62	High	0.002605	0.04864
High	[R].YHNQTLR.[Y]	[N3]	P11717 [398-404]	0.0836548	0.00375262	1	1.14943	161.775	184.825	2.115	High	0.00320025	0.066795
High	[R].YHQCYNGSGMDYR.[G]	[N6]	Q01974 [313-325]	0.0197937	0.000976918	1	0.903506	209.86	190.14	2.204	High	0.0007502	0.0142178
High	[R].YHSQTYGNGSK.[C]	[N8]	Q13438 [170-180]	0.0096211	0.000538533	1.75	1.38074	161.775	224.675	2.77	High	0.000419175	0.0065278
High	[R].YHYNGSLMDGTLFDSSYSR.[N]	[N4]	Q96AY3 [291-309]	0.0271043	0.00102963	1.2	0.850196	215.62	184.38	2.1	High	0.00097	0.0219689
High	[R].YHYNGTFEDGK.[K]	[N4]	Q96AY3 [67-77]	0.0124038	0.000493432	2.25	1.47547	114.3	168.775	2.6075	High	0.000763375	0.0159222
High	[R].YHYNGTFEDGKK.[F]	[N4]	Q96AY3 [67-78]	0.0455203	0.00309392	1	1.27119	102.5	114.267	2.08667	High	0.002395	0.0367767
High	[R].YHYNGTLLDGTSFDTSYSK.[G]	[N4]	Q96AY3 [179-197]	0.00908615	0.00034425	1	0.844595	216.75	183.25	1.895	High	0.00026385	0.0059137
High	[R].YKPDTLAVAVENGTGTDR.[Q]	[N12]	Q9H0X4 [378-395]	0.00163224	0	1	0.994777	200.025	199.975	3.0125	High	0	0.00102338
High	[R].YNATVYSQAANGTEGQPQAIEFR.[T]	[N2; N11]	Q12913 [341-363]	0.000442441	0	1.25	0.513018	263.375	136.625	3.3175	High	0	0.000234327
High	[R].YNCTATNHIGTR.[F]	[N2]	O15394 [473-484]	1.71178e-05	0	1.25	0.395961	286.475	113.525	3.3525	High	0	6.84842e-06
High	[R].YNSTIQESLHR.[S]	[N2]	Q9BYE2 [291-301]	0.000163941	0	1	0.941841	205.775	194.225	3.155	High	0	7.56556e-05
High	[R].YVQNGTYTVK.[I]	[N4]	Q14126 [459-468]	0.00123237	0	2.25	1.34725	120	167.925	2.4525	High	0.00037725	0.0109517
High	[RK].NYTADYDK.[TA]	[N1]	O75477 [106-113]	0.0125198	0.000172125	2.75	1.66251	98.275	176.375	2.62	High	0.00058875	0.0162586

## Sheet: R3
Confidence	Annotated Sequence	glycosylation position	Positions in Master Proteins	Qvality PEP	Qvality q-value	# PSMs	Abundance Ratio: (117) / (115)	Abundances (Scaled): F69: 115, Sample	Abundances (Scaled): F69: 117, Sample	XCorr Sequest HT	Confidence Sequest HT	Percolator q-Value Sequest HT	Percolator PEP Sequest HT
High	[K].AAIPSALDTNSSK.[S]	[N10]	Q08380 [542-554]	0.000150616	0	2	2.56082	111.8	288.2	2.595	High	0	8.3635e-05
High	[K].AALSWSNGNGTASCR.[V]	[N9]	Q12913 [223-237]	0.00450864	0.000157236	2	0.895599	152.5	127.986	2.16143	High	0.0001206	0.00234965
High	[K].AASMNHTK.[A]	[N5]	Q9UBV2 [213-220]	0.0826909	0.00355811	1	1.06496	152.6	165.5	1.62	High	0.00265827	0.064942
High	[K].AATCINPLNGSVCERPANHSAK.[Q]	[N9; N18]	O75882 [906-927]	0.0125321	0.00049637	1	0.792079	173.1	142.2	2.0225	High	0.0003795	0.00447202
High	[K].ACNNSACDWDGGDCSGNSGGSR.[Y]	[N3]	Q3T906 [455-476]	3.95522e-05	0	1.6	0.810898	219.06	180.94	3.396	High	0	1.73528e-05
High	[K].AEMNGSK.[L]	[N4]	P16422 [71-77]	0.1218	0.00468306	1	2.6738	43.2	115.6	2.4	High	0.003515	0.1002
High	[K].AFNSTLPTMAQMEK.[A]	[N3]	P16070 [55-68]	0.0217929	0.000830511	1.57143	1.07198	192.229	207.771	2.30714	High	0.000625	0.0174435
High	[K].AGCECLNESDEHGFDNCLR.[K]	[N7]	O43396 [133-151]	0.00241663	0	1	1.03896	196.25	203.75	2.095	High	0	0.00152677
High	[K].AGFEAVENGTVCR.[G]	[N8]	P29323 [258-270]	0.00250319	0.000177214	1.33333	1.19	144.067	168.7	2.09	High	0.0001366	0.000897853
High	[K].AGHFQNTSSPSAR.[C]	[N6]	P36941 [172-184]	0.00185826	0	1	0.691802	235.75	164.25	2.44	High	0	0.00090175
High	[K].AINDTAAR.[L]	[N3]	Q02487 [627-634]	0.0807334	0.00304279	1.5	0.679002	195.05	144.3	1.9275	High	0.0023492	0.0580908
High	[K].AINQTAVECTWTGPR.[N]	[N3]	Q92673 [1852-1866]	3.12981e-06	0	2.5	0.937866	206.125	193.875	3.6275	High	0	2.15518e-06
High	[K].ALMNGSESR.[F]	[N4]	P35613 [265-273]	0.112373	0.00453101	1.33333	1.02512	151.217	152.15	1.55	High	0.0043035	0.0907233
High	[K].ALSPNSTISSAPK.[D]	[N5]	Q9UH99 [632-644]	0.00114125	0	2	1.51803	134.55	209.525	2.44	High	0	0.00488458
High	[K].AMSSNETAAYK.[I]	[N5]	Q8TCJ2 [637-647]	0.0186217	0.000754954	1.75	1.71527	106.7	188.575	2.45	High	0.000563375	0.0163215
High	[K].ANATIEVK.[A]	[N2]	Q9Y639 [228-235]	0.053186	0.00178198	1	1.51362	158.9	241.1	1.98667	High	0.00132767	0.041868
High	[K].ANDSDQGANAEIEYTFHQAPEVVR.[R]	[N2]	Q08174 [304-327]	3.86946e-05	0	1.25	0.970167	202.325	197.675	2.94	High	0	1.42852e-05
High	[K].ANIQFGDNGTTISAVSNK.[A]	[N8]	Q14108 [98-115]	6.4444e-06	0	2.5	1.36379	168.65	231.35	3.47	High	0	4.29664e-06
High	[K].ANLTWSVK.[H]	[N2]	O00754 [366-373]	0.0468992	0.00218646	1.33333	1.36426	169.1	230.9	1.92667	High	0.00398113	0.0555697
High	[K].ANTTQPGIVEGGQVLK.[C]	[N2]	P06756 [73-88]	1.44518e-05	0	2.5	2.0284	100.725	200.95	3.53	High	0	5.72187e-06
High	[K].APDSNCSNLLITTR.[Q]	[N5]	A2RU67 [392-405]	0.0394	0.00110731	1.66667	0.70406	185	132.3	1.73333	High	0.000844	0.0158713
High	[K].AVLVNNITTGER.[L]	[N6]	Q8NBJ4 [104-115]	0.0121777	0.00071255	1.66667	1.44648	162.8	237.2	2.29333	High	0.000543167	0.00782693
High	[K].CATVTENATGDLATSR.[N]	[N7]	O43291 [88-103]	8.727e-06	0	2	0.914495	97.575	90.7	3.3025	High	0	1.62623e-05
High	[K].CCGAANYTDWEK.[I]	[N6]	P08962 [145-156]	0.00114355	0	4.5	1.34635	107.725	149.35	2.99	High	0	0.000621135
High	[K].CHAGYIGDNCNCSTDISTCR.[G]	[N11]	P18084 [576-595]	1.87338e-07	0	1	1.13921	186.64	213.36	4.874	High	0	9.48513e-08
High	[K].CHEGNGTFECGACR.[C]	[N5]	P05556 [477-490]	9.91856e-06	0	2.25	1.11266	188.625	211.375	3.12	High	0	5.629e-06
High	[K].CINQSICEK.[C]	[N3]	O75882 [1071-1079]	0.101974	0.00510554	1	1.50602	39.9	60.1	1.17	High	0.003787	0.07904
High	[K].CLSEGQPPPSYNWTR.[L]	[N12]	Q96NY8 [270-284]	0.00313465	0	1.25	0.798882	191.25	156.15	2.68	High	0	0.00190246
High	[K].CNASSQFLCSSGR.[C]	[N2]	Q07954 [2904-2916]	0.0304745	0.000917601	1	1.1325	179.75	220.25	1.6125	High	0.000689975	0.0230567
High	[K].CNMINGTDGDSFHPLITK.[D]	[N5]	Q14108 [245-262]	0.00499377	0.000215615	1.6	0.87382	175.26	150.6	2.108	High	0.00030716	0.00491246
High	[K].CQEAINATCK.[G]	[N6]	P78536 [534-543]	0.00163228	0	1.75	1.18413	140.15	173.475	2.7125	High	0.000298775	0.00534145
High	[K].DIGNYSCAAQGTQTGSK.[K]	[N4]	Q9NYQ6 [1573-1589]	0.0184059	0.000357831	1	1.05895	193.3	206.7	2.06	High	0.000270633	0.0125897
High	[K].DLDTDFTNNASQPETK.[A]	[N9]	O75976 [1062-1077]	0.0127368	0.000672083	2	0.992392	197.133	202.867	2.75667	High	0.0006473	0.0108746
High	[K].DMSDGFISNLTIQR.[Q]	[N9]	P13674 [105-118]	0.0137114	0.000305141	1.375	0.645057	226.8	146.475	2.17875	High	0.000231475	0.00658368
High	[K].DSDKEGTSNSTSEDGPGDGFTILSSK.[S]	[N9]	Q9P0M6 [164-189]	0.000403754	0	1	1.18064	183.4	216.6	2.87	High	0	0.0001864
High	[K].DTGELNVTSILDR.[E]	[N6]	Q14126 [107-119]	0.0100907	0.000221207	1.5	0.933489	206.8	193.2	2.515	High	0.00016845	0.00229632
High	[K].DVECGEGHFCHDNQTCCR.[D]	[N13]	P28799 [518-535]	5.14303e-06	0	1.75	1.04712	170.25	177.55	3.965	High	0	3.73278e-06
High	[K].DYYPINESLASLPLR.[V]	[N6]	O96005 [290-304]	1.11494e-05	0	4	0.700158	234.65	165.35	3.2225	High	0	7.11812e-06
High	[K].EDALNETR.[E]	[N5]	P10909 [82-89]	0.0454818	0.00143012	1	1.64024	151.533	248.467	1.78333	High	0.00107633	0.0318753
High	[K].EIFVANGTQGK.[L]	[N6]	O95297 [45-55]	0.00063389	0	1	1.09091	191.2	208.8	2.15667	High	0	0.00035017
High	[K].EINSLNLTESHNSR.[K]	[N6]	P23229 [925-938]	0.0959037	0.00382101	1	0.744417	229.2	170.8	1.15667	High	0.00286567	0.0600633
High	[K].ENGMPMDIVNTSGR.[F]	[N10]	Q9Y639 [275-288]	0.0587698	0.00227977	1.71429	0.791139	194.486	153.357	2.03857	High	0.00194011	0.0446197
High	[K].ENGTDTVQEEEESPAEGSK.[D]	[N2]	Q9Y4L1 [595-613]	3.93351e-08	0	5.25	1.73611	111.05	201.15	4.645	High	0	5.22799e-07
High	[K].ENSSEICSNNGECVCGQCVCR.[K]	[N2]	P05556 [519-539]	2.84148e-05	0	1.44444	1.38291	167.6	232.4	3.81222	High	0	1.49208e-05
High	[K].ENTSDPSLVIAFGR.[G]	[N2]	P11279 [83-96]	0.00377204	0.00013291	1.75	1.09739	95.2	107.725	2.7825	High	0.00010245	0.00169888
High	[K].EPGSNVTMSVDAECVPMVR.[D]	[N5]	Q08380 [188-206]	0.00776295	0.000436179	1.42857	1.01317	194.657	205.343	2.51	High	0.000330043	0.00552168
High	[K].EQYIHENYSR.[A]	[N7]	O60568 [542-551]	0.000567617	0	2.75	0.973473	151.35	151.2	2.7925	High	0	0.0003007
High	[K].ETNFSLASGLEAK.[D]	[N3]	P56159 [57-69]	0.0055735	0.000279138	1.75	0.733003	229.7	170.3	2.45	High	0.00021285	0.00377407
High	[K].EVEVNSSK.[C]	[N5]	P18564 [459-466]	0.0379401	0.00187906	1	2.39617	61.3667	152.833	1.65	High	0.00139893	0.028426
High	[K].FITNTETPLNNGSTPR.[I]	[N11]	Q96GX1 [362-377]	0.018436	0.000795147	2.25	0.88164	212.25	187.75	2.1	High	0.0005992	0.0136616
High	[K].FLSSSPHLPPSSYFNASGR.[A]	[N15]	O14773 [429-447]	0.0074217	0.000269519	2.25	1.08519	191.3	208.7	2.0075	High	0.000737225	0.015976
High	[K].FNSSSSSLEEK.[I]	[N2]	Q9H173 [192-202]	0.0140278	0.000175687	1	1.63845	116.8	190.8	2.36667	High	0.000131667	0.00969433
High	[K].FNSTQIAAMAPEHEEPR.[I]	[N2]	Q4G148 [236-252]	0.00362557	0	1	0.799361	222.233	177.767	2.55333	High	0	0.00218473
High	[K].FPDEEGACQPCPINCTHSCVDLDDK.[G]	[N14]	P04626 [616-640]	0.00542742	0	2	1.34529	168.8	231.2	2.28	High	0.000714	0.0183371
High	[K].FVGTPEVNQTTLYQR.[Y]	[N8]	P01033 [46-60]	0.00142419	0	1.75	0.865801	182.65	160.9	2.5825	High	0	0.000763737
High	[K].FVNSTGYLTEAEK.[F]	[N3]	Q8NBK3 [139-151]	5.01935e-07	0	2.25	1.60836	112.1	180.975	3.6175	High	0	5.21146e-07
High	[K].GLNLTEDTYKPR.[I]	[N3]	Q08380 [396-407]	0.0120862	0.000672083	1	2.23881	54.7333	129.033	1.42667	High	0.000508333	0.00867162
High	[K].GNPYSDLGNHTTCR.[Y]	[N9]	Q4KMQ2 [794-807]	2.40382e-06	0	1	1.04987	195	205	3.12	High	0	7.5595e-07
High	[K].GNSTHGCSSEETFLIDCR.[G]	[N2]	Q03405 [221-238]	0.000632493	0	1	1.50943	127.05	193.35	3.1425	High	0	0.000338525
High	[K].GPTNNTCVVR.[T]	[N4]	Q8TEM1 [1438-1447]	0.0281117	0.0011743	1	0.840807	103.967	85.0333	1.25667	High	0.000881	0.0219315
High	[K].GQTEIQVNCPPAVTENK.[T]	[N16]	Q16563 [56-72]	2.42812e-07	0	2.25	1.332	168.85	231.15	3.68	High	0	3.896e-07
High	[K].GSLSYLNVTR.[K]	[N7]	P07339 [257-266]	0.00920973	0.000273217	2	0.778513	160.45	122.75	1.8	High	0.00020845	0.0059205
High	[K].GSQWSDIEEFCNR.[S]	[N12]	P08174 [84-96]	0.00562397	0.000221207	2	0.809225	188.05	150.725	2.79	High	0.00016845	0.00153167
High	[K].GSTLSQWSLGNGTPVTSK.[G]	[N11]	Q7Z2K6 [809-826]	0.0112152	0.000345667	1	0.744417	227.6	172.4	2.27667	High	0.000261767	0.007389
High	[K].GTNFTHLVADR.[V]	[N3]	Q9C0C4 [417-427]	6.30843e-05	0	1.25	0.370817	260.8	95.975	3.59	High	0	2.97922e-05
High	[K].GVAVTNTSK.[L]	[N6]	Q99571 [70-78]	0.00944151	0.00039216	1	1.83234	140.825	259.175	2.28	High	0.000298775	0.00498175
High	[K].GVLMVGNETTYEDGHGSR.[K]	[N7]	Q8IWA5 [181-198]	8.13763e-05	0	1	0.693481	235.471	164.529	3.00143	High	0	4.26203e-05
High	[K].GVVDSDDLPLNVSR.[E]	[N11]	P14625 [435-448]	0.00914396	0	1.66667	0.834725	187.8	159.733	2.54333	High	0	0.00600632
High	[K].HLLENSTASVSEAER.[K]	[N5]	P42892 [162-176]	0.00238196	0.000177214	1.66667	0.899281	209.467	190.533	2.56333	High	0.000619933	0.0122366
High	[K].HLNASNPTEPATIIFTAAR.[E]	[N3]	Q8NFQ8 [284-302]	0.0215338	0.00066261	2.6	0.624298	245.68	154.32	2.638	High	0.00055066	0.0140335
High	[K].HLNSSHPR.[S]	[N3]	Q5JTV8 [397-404]	0.0288924	0	1	0.898473	95.8	86.1	1.36	High	0	0.01928
High	[K].HLTNDTTTPESTMTSGQAR.[A]	[N4]	Q9NWD8 [77-95]	0.000143985	0	1	0.747943	228.65	171.35	2.9525	High	0	8.021e-05
High	[K].HMLALAPNSTAR.[R]	[N8]	Q92508 [2324-2335]	0.00123537	0	2	0.813421	160.675	136.062	2.8625	High	5.1225e-05	0.000820393
High	[K].HNNDTQHIWESDSNEFSVIADPR.[G]	[N3]	P14625 [215-237]	0.00313385	0.000123938	6.77778	0.838223	203.078	173.044	2.92444	High	9.45889e-05	0.0020484
High	[K].HNQSEYEDSAGECCSCPK.[T]	[N2]	P06213 [697-714]	0.00189958	0	1	1.33156	171.5	228.5	2.27	High	0	0.0010695
High	[K].HTNMNLTQLK.[V]	[N5]	Q15165 [250-259]	0.0321085	0.00130044	1.85714	1.19454	148.286	181.857	2.32714	High	0.000976429	0.0245715
High	[K].IDAYNEAAVSILNSSTR.[N]	[N13]	Q96PB1 [229-245]	0.000127808	0	1	0.638298	243.633	156.367	2.56333	High	0	5.51013e-05
High	[K].IDSTGNVTNELR.[V]	[N6]	O75882 [411-422]	0.00966777	0.000321202	2.4	0.908595	153.5	144.16	2.402	High	0.0003787	0.00752072
High	[K].IGYSNNGSDWK.[M]	[N6]	O14786 [517-527]	0.0439972	0.00189864	2	1.5536	84	131.8	2.26333	High	0.00144667	0.0190907
High	[K].IHVAGETDSSNLNVSEPR.[A]	[N13]	Q12913 [401-418]	0.000870974	0	1	0.893815	210.08	189.92	3.146	High	0	0.000505611
High	[K].ILLTCSLNDSATEVTGHR.[W]	[N8]	P35613 [153-170]	5.79614e-06	0	1.5	0.880282	212.55	187.45	3.93	High	0	3.16854e-06
High	[K].INATDADEPNTLNSK.[I]	[N2]	Q14126 [181-195]	3.56122e-08	0	2.25	1.65153	114.25	181.175	4.7	High	0	3.16635e-08
High	[K].INYTVPQSGTFK.[I]	[N2]	Q6YHK3 [418-429]	0.0684843	0.00288627	1	1.22549	179.7	220.3	1.75	High	0.002142	0.05046
High	[K].IQQESLGSAPLMGDDHPNASR.[D]	[N18]	Q5JRA6 [572-592]	0.000726929	0.000106328	1.2	0.925754	153.66	135.26	3.28	High	8.196e-05	0.000202662
High	[K].ISSLQTTEKNDTVAGQGER.[D]	[N10]	P06756 [865-883]	7.55702e-05	0	2.5	2.53968	63.675	152.925	3.365	High	0	0.000308316
High	[K].ITPNNNGTYACFVSNLATGR.[N]	[N6]	P06731 [645-664]	0.00122052	0	2.28571	0.609703	248.3	151.7	3.04143	High	0	0.000689276
High	[K].KEDALNETR.[E]	[N6]	P10909 [81-89]	0.00705353	0.000177214	1	1.61725	84.1	135.1	2.83	High	0.0001366	0.002547
High	[K].KGTNFTHLVADR.[V]	[N4]	Q9C0C4 [416-427]	0.0144315	0.000531641	1	0.474608	271.3	128.7	1.79	High	0.0004098	0.002533
High	[K].KPNNLNDTIK.[E]	[N6]	Q11201 [109-118]	0.00739016	0.00018967	1.33333	1.53531	91.3333	143.533	2.62	High	0.0001448	0.00491783
High	[K].LANNTHQHVFDDLR.[G]	[N3]	Q99523 [96-109]	0.0337319	0.00187906	4.6	0.762311	195.02	149.22	2.858	High	0.0014086	0.0284392
High	[K].LEGMNETVSNLTQR.[V]	[N5; N10]	O75071 [292-305]	0.0255928	0.00145679	1	0.670017	239.55	160.45	1.5	High	0.0010992	0.018933
High	[K].LENLSSSEMGYTATLTR.[T]	[N3]	P10253 [138-154]	0.0208457	0.00107725	1.25	1.5537	140.275	224.7	3.02625	High	0.000807375	0.0175252
High	[K].LEWLGNCSGLNDETYGYK.[E]	[N6]	P05026 [153-170]	0.000109707	0	1.6	1.57778	126.04	215.56	3.712	High	0	7.5e-05
High	[K].LGDCISEDSYPDGNITWYR.[N]	[N14]	Q13740 [154-172]	0.00413717	0.00018967	1.66667	0.807754	221.233	178.767	2.59333	High	0.0001448	0.00284065
High	[K].LGVIEDHSNR.[T]	[N9]	P14625 [494-503]	0.000277997	0	1	1.04275	71.7	74.8	2.67	High	0	0.0001102
High	[K].LLPAFNTTSGLPYPR.[I]	[N6]	Q9BZQ6 [190-204]	0.00569949	0.00025925	2	0.83717	217.275	182.725	2.7375	High	0.000196325	0.00380603
High	[K].LNITCESSK.[K]	[N2]	Q4KMQ2 [360-368]	0.0292971	0.000967026	1	1.44578	86.1667	120	1.83	High	0.000732933	0.0133918
High	[K].LNLQTSTSIPNVTEMK.[T]	[N11]	P17301 [95-110]	0.0290385	0.00108856	1	0.695088	233.533	166.467	1.70667	High	0.000820267	0.022333
High	[K].LNQTEPVAGNYYPVNTR.[I]	[N2]	O00754 [765-781]	2.0773e-07	0	1.25	1.43164	120.025	179.85	4.115	High	0	8.73725e-08
High	[K].LPENQTSPGESPER.[G]	[N4]	Q12770 [587-600]	0.000996544	0	1.75	1.1534	181.175	218.825	2.335	High	0	0.000465
High	[K].LQFDDNGTYTCQVK.[N]	[N6]	O60487 [113-126]	9.74137e-06	0	2	1.31839	159.3	212.45	3.2625	High	0	6.10646e-06
High	[K].LQGLENWGQDPGVSANASK.[A]	[N16]	Q96AQ6 [440-458]	0.00148226	0	2.33333	1.13593	187.067	212.933	2.16333	High	0.000275567	0.00312548
High	[K].LQNNISYQMADIHHLK.[E]	[N4]	Q6P4E1 [112-127]	0.00596375	0.000302153	2.28571	1.0851	191.429	208.571	2.48571	High	0.000325243	0.00592848
High	[K].LSDTTSQSNSTAK.[E]	[N9]	P07942 [1271-1283]	0.000307657	0	2	3.36134	68.125	224.125	2.97	High	0.00010245	0.0012565
High	[K].LTSCATNASICGDEAR.[C]	[N7]	Q07954 [3782-3797]	2.28338e-05	0	2.25	1.26542	173.35	226.65	3.43	High	0	9.14962e-06
High	[K].LVANESVPFETSCR.[Y]	[N4]	Q9NXG6 [345-358]	0.000253366	0	2	1.11029	149.6	167.7	3.09	High	0	0.000199663
High	[K].LVGGPVAGGDPNQTIR.[G]	[N12]	O15230 [84-99]	1.38908e-05	0	2	1.1744	152.2	181.175	3.49	High	0	9.1944e-06
High	[K].MNFTGGDTCHK.[V]	[N2]	P11717 [1311-1321]	0.0289748	0.00128062	1	1.30378	81.4333	102.117	2.04167	High	0.00104813	0.023065
High	[K].MSVCTDNVTDLR.[I]	[N7]	Q6UXG2 [711-722]	0.0105986	0.000409214	1.25	1.43343	99.9125	151.65	2.06375	High	0.000308475	0.00768607
High	[K].MVLWNDSVVR.[H]	[N5]	Q9Y487 [501-510]	0.041636	0.00183977	1	0.99167	170.34	169.28	1.852	High	0.00137664	0.0292494
High	[K].MYSEGSDIVPQSNETALHYFK.[K]	[N13]	Q9UBV2 [419-439]	0.00270029	0	1	0.830703	213.8	186.2	2.806	High	0	0.00156572
High	[K].NANGSYTCEECDSSCVGCTGEGPGNCK.[E]	[N3]	Q6UXH1 [249-275]	0.00238171	8.1287e-05	1.57143	2.65756	107.914	292.086	3.22571	High	6.20571e-05	0.00160924
High	[K].NATLAEQAK.[L]	[N1]	Q9Y4L1 [869-877]	0.0136872	0.000256165	2.5	2.02122	104.775	215.525	2.24	High	0.00019205	0.00943515
High	[K].NATYGYVLDDPDPDDGFNYK.[Q]	[N1]	O43852 [131-150]	0.0239948	0.000954633	1.33333	1.40878	165.617	234.383	2.63833	High	0.000711667	0.0195584
High	[K].NCTQSLQCWK.[Y]	[N1]	P46531 [1489-1498]	0.0141744	0.000294943	1	1.18859	182.7	217.3	1.70333	High	0.0002246	0.00439233
High	[K].NELMLNSSLMR.[I]	[N6]	O00468 [130-140]	0.023934	0.000535045	1.33333	1.30605	173.267	226.733	1.94333	High	0.000407233	0.0138937
High	[K].NESLETYPVMK.[Y]	[N1]	P05026 [193-203]	0.0403606	0.00201625	1	0.640615	94.8	60.7	1.71	High	0.001525	0.03045
High	[K].NETIWYLK.[Y]	[N1]	O15342 [70-77]	0.00861735	0	1	1.54719	156.767	243.233	2.08333	High	0	0.0054442
High	[K].NGDAYGFYNNSVK.[T]	[N9]	Q6P4A8 [63-75]	0.0110264	0.000390579	1.85714	1.39916	139.171	193.286	2.71714	High	0.000293	0.00856333
High	[K].NGSGAVFPVAGADVQTLR.[E]	[N1]	O00391 [130-147]	0.00365494	0	2	0.674309	238.9	161.1	2.78	High	0	0.001927
High	[K].NGSTEIYGECGVCPR.[G]	[N1]	Q9P055 [37-51]	0.00766367	0.000221207	1.75	0.808734	178.65	146.3	2.7675	High	0.00016845	0.00172455
High	[K].NGVNGTGENGR.[K]	[N4]	P05556 [403-413]	0.0301169	0.00107892	2.5	1.41764	87.7	120.57	1.982	High	0.00098443	0.0236533
High	[K].NGVNGTGENGRK.[C]	[N4]	P05556 [403-414]	0.0299968	0.00129187	1.71429	1.96188	69.6714	139.829	2.05	High	0.00107224	0.0149711
High	[K].NITIVTGAPR.[H]	[N1]	P26006 [265-274]	0.0367614	0.00138844	1.33333	1.24018	139.6	175.5	2.21	High	0.0014663	0.0316487
High	[K].NLNNSQSDVVSFR.[L]	[N3]	P08648 [771-783]	0.043997	0.00201611	1	1.36101	168.875	231.125	1.89	High	0.00157835	0.0363621
High	[K].NLTFEGPLPEK.[I]	[N1]	Q9HAT2 [401-411]	0.020424	0.000294943	1.66667	1.4985	119.4	185.967	2.74	High	0.0002246	0.00558083
High	[K].NMSFVNDLTVTQDGR.[K]	[N1]	Q9HDC9 [196-210]	0.00385495	0.000156864	1.9	0.796622	209.04	167.26	3.028	High	0.00041558	0.00848801
High	[K].NMTFDLPSDATVVLNR.[S]	[N1; N15]	P11279 [62-77]	0.0187432	0.0010689	2.45455	0.994755	189.127	189.218	2.54091	High	0.00128918	0.020975
High	[K].NNHTASILDR.[M]	[N2]	P08962 [129-138]	0.00498534	0.000110604	2.875	1.16771	117.375	137.438	2.7925	High	0.000123663	0.0044113
High	[K].NNTTFLECAPK.[S]	[N1]	Q99985 [585-595]	0.000667519	0.000106328	5.4	0.55816	217.84	122.8	2.814	High	0.000324	0.00609582
High	[K].NNTYLVK.[R]	[N1]	Q6P4E1 [150-156]	0.139746	0.00588964	1	1.36986	168.8	231.2	1.94	High	0.004422	0.1159
High	[K].NPVGLIGAENATGETDPSHSK.[F]	[N10]	P43251 [340-360]	0.000621961	0	1.33333	1.10457	189.633	210.367	2.81	High	0	0.000305837
High	[K].NQSVPLSCCR.[E]	[N1]	O60637 [167-176]	0.119196	0.00541228	1	1.11826	157.425	179.025	1.89	High	0.0042667	0.0938023
High	[K].NSSQVLGEK.[V]	[N1]	Q9Y653 [303-311]	0.054654	0.00297725	1	1.08932	151.1	164.4	2.05667	High	0.0023173	0.0433398
High	[K].NSTCLDDSWIHPR.[N]	[N1]	Q96F46 [54-66]	0.047548	0.00293948	1.25	0.743633	228.425	171.575	1.95	High	0.00231175	0.0246284
High	[K].NTNSSNNFSR.[S]	[N3]	Q9H0X4 [114-123]	0.0225714	0.001037	1	1.0395	68.3	71	1.63	High	0.0007853	0.01545
High	[K].NTSHGSTSQCK.[F]	[N1]	O75072 [92-102]	0.0050226	0.00013291	1	0.904977	209.4	190.6	1.8675	High	0.00010245	0.002356
High	[K].NTSVEHTR.[L]	[N1]	Q96JJ7 [258-265]	0.00349553	0	1.5	0.939188	134.4	124.225	2.48	High	0	0.00195992
High	[K].NTTSVWYTSK.[G]	[N1]	P04066 [382-391]	0.0138151	0.00018967	1	1.5625	156.033	243.967	2.81	High	0.0001448	0.0093101
High	[K].NVDMAGFIANNGTR.[E]	[N11]	Q9NYQ6 [1630-1643]	0.0456288	0.00172437	2.75	0.674423	231.675	168.325	1.72	High	0.0015561	0.0263475
High	[K].NVSCLWCNTNK.[A]	[N1]	P53801 [54-64]	0.000314288	0	1.6	1.25063	141.82	178.24	3.116	High	0	0.000142395
High	[K].NVSVAEGK.[E]	[N1]	Q9P2B2 [286-293]	0.0226855	0.000518767	1	1.83374	141.133	258.867	1.81667	High	0.000392667	0.0131973
High	[K].NWQLTEEDFGNTSGR.[L]	[N11]	P30825 [216-230]	0.0431093	0.00221936	1.4	0.76864	204.12	157.86	1.714	High	0.00164936	0.033226
High	[K].NYSVLYFQQK.[V]	[N1]	P42785 [47-56]	0.01176	0.000221207	1.75	0.966884	203.075	196.925	2.3	High	0.00016845	0.00664388
High	[K].QCNGTSMCWCVNTAGVR.[R]	[N3]	P16422 [109-125]	0.0294941	0.000775207	1	0.679925	237.6	162.4	1.8425	High	0.0006716	0.0123412
High	[K].QDNETGIYYETWNVK.[A]	[N3]	O75503 [201-215]	0.0240221	0.00201625	1	0.63012	245.4	154.6	1.76	High	0.001525	0.01738
High	[K].QDQQLQNCTEPGEQPSPK.[Q]	[N7]	O00584 [206-223]	0.00282001	0	1	0.877193	212.5	187.5	2.19	High	0	0.00182215
High	[K].QLSCVANQNGSQADCELGNPFK.[R]	[N9]	P23229 [762-783]	2.98528e-06	0	1.5	1.03977	195.525	204.475	3.665	High	0	1.85682e-05
High	[K].QLVHSFAEGQDQGSAYANR.[T]	[N18]	Q5ZPR3 [74-92]	1.51402e-10	0	4.5	0.717746	232.35	167.65	5.835	High	0	1.92147e-09
High	[K].QNNGAFNETLFR.[N]	[N7]	P02786 [721-732]	0.0274068	0.000889444	2	0.702521	181.867	129.344	2.73889	High	0.000704333	0.0167558
High	[K].QPVSPVIHPPVSYNDTAPR.[I]	[N14]	Q15904 [248-266]	6.79839e-05	0	1.5	0.858922	214.625	185.375	3.1	High	0	3.4848e-05
High	[K].QSGDVTCNCTDGR.[V]	[N8]	Q07954 [4357-4369]	0.0296759	0.000442414	1	3.0722	97.9	302.1	1.835	High	0.0003369	0.008996
High	[K].QYLSYETLYANGSR.[T]	[N11]	O95084 [83-96]	0.0207653	0.000854478	1.5	0.840866	217.175	182.825	2.08	High	0.00063795	0.0143385
High	[K].RGPECSQNYTTPSGVIK.[S]	[N8]	O14786 [143-159]	3.42021e-05	0	1.25	1.14877	186	214	3.4075	High	0	1.80928e-05
High	[K].RNDAGSYECEIQNPASANR.[S]	[N18]	P40199 [207-225]	0.00412336	0.000265821	2	0.736377	225.2	174.8	2.205	High	0.0002049	0.001645
High	[K].RQNITNQLEK.[W]	[N3]	Q68CQ7 [255-264]	0.00515899	0.000136608	1	0.909504	209.475	190.525	3.0575	High	0.000104225	0.00329505
High	[K].RQNQSLVYGK.[V]	[N3]	Q09328 [445-454]	0.00376818	0	1	0.6876	132.2	89	3.23	High	0	0.00202873
High	[K].SCGECIQAGPNCGWCTNSTFLQEGMPTSAR.[C]	[N17]	P05556 [34-63]	0.000131847	0	1.63636	1.02641	195.609	204.391	3.57909	High	0	8.3949e-05
High	[K].SCVAVTSAQPQNMSR.[R]	[N12]	O15031 [517-531]	0.00131218	0	1.875	0.998752	189.6	191.05	3.13625	High	0.00018125	0.00653478
High	[K].SDAVSHTGNYTCEVTELTR.[E]	[N9]	Q08722 [103-121]	3.38321e-05	0	3.25	0.97561	146.075	151.775	3.61	High	0	3.70957e-05
High	[K].SDPHWESMLNATTR.[R]	[N10]	Q9H0X4 [305-318]	0.0176679	0.000737	1	0.949127	204.12	195.88	2.088	High	0.00055496	0.0129491
High	[K].SELVNETR.[W]	[N5]	Q9UGT4 [158-165]	0.0190083	0.000363459	1	1.67015	129.3	214.05	1.76	High	0.00027705	0.010005
High	[K].SHTNTSHVMQYGNK.[T]	[N4; N13]	Q99538 [260-273]	0.0524492	0.00185462	1	0.864803	120.867	107.567	1.87	High	0.0013918	0.0396933
High	[K].SLTTSLHNK.[T]	[N8]	Q92673 [1887-1895]	0.0157355	0.000221207	1.5	1.27836	77.95	99.975	2.1225	High	0.00016845	0.0098744
High	[K].SLVTQYLNATGNR.[W]	[N8]	P08195 [417-429]	0.00906736	0.000288036	2.71429	0.594682	168.829	110.286	2.56714	High	0.000217857	0.00633905
High	[K].SNDTAASEYK.[Y]	[N2]	Q12913 [141-150]	0.0742834	0.00389048	1	1.96754	113.15	224.475	1.7425	High	0.00301175	0.0467213
High	[K].SNVSGNTHLCISNGNYEK.[E]	[N2]	P56159 [405-422]	0.0132305	0.000214699	1.6	0.681385	216.9	151.66	2.448	High	0.00023606	0.0104237
High	[K].SPANGSLGPTLNLSSGESR.[L]	[N4; N12]	Q9BZC7 [1546-1564]	0.00212542	0.000106328	1.4	0.717154	231.18	168.82	2.7	High	8.196e-05	0.000929377
High	[K].STGCAAPMVYLDCSNSSAGTPGAECLR.[S]	[N15]	Q9HC84 [791-817]	0.000115375	0	1	0.896057	211	189	2.79	High	0	4.145e-05
High	[K].TANDTSTEAYNLLLR.[T]	[N3]	P11047 [1203-1217]	0.00260382	9.10722e-05	1.5	1.386	115.033	151.15	2.82167	High	6.94833e-05	0.00167834
High	[K].TAVNCSSDFDACLITK.[A]	[N4]	P13987 [40-55]	0.000324777	0	2.25	1.0923	166.4	180.775	2.4075	High	0	0.000153979
High	[K].TCNPETFPSSNESR.[Q]	[N11]	Q8IWA5 [407-420]	8.14836e-05	0	3.75	1.00806	173.725	176.9	2.975	High	0	4.63645e-05
High	[K].TCPAGVMGENNTLVWK.[Y]	[N10]	P00533 [594-609]	0.0419069	0.00122158	1.4	0.737572	229.06	170.94	1.79	High	0.00092014	0.0297022
High	[K].TFKNESENTCQDVDECQQNPR.[L]	[N4]	P48960 [105-125]	0.000552303	0	1.2	2.11954	127.7	272.3	3.154	High	0	0.000319023
High	[K].THEAEIVEGENHTYCIR.[F]	[N11]	P21333 [2185-2201]	1.30671e-08	0	1	1.61812	152.8	247.2	3.41	High	0	2.213e-09
High	[K].TLETHSNK.[T]	[N7]	Q92673 [1602-1609]	0.0614695	0.00250887	1	2.16606	42.7667	94.2333	1.67667	High	0.00187633	0.0464367
High	[K].TLSPTGNISSAPK.[D]	[N7]	O94901 [726-738]	0.00636002	0.000136608	2.75	0.841928	216.625	183.375	2.635	High	0.000272675	0.00514285
High	[K].TMFNSTDIK.[L]	[N4]	Q96K49 [65-73]	0.00801927	0.000177214	1	1.1655	140.3	172.533	1.92	High	0.0001366	0.00408033
High	[K].TNNSTCQPCPYGSYSNGSDCTR.[C]	[N3; N16]	Q6UXG2 [389-410]	0.0195734	0.000553657	1.66667	1.21507	179.15	220.85	3.515	High	0.000422	0.00792496
High	[K].TPMTNSSIQFLDNAFR.[K]	[N5]	P15586 [275-290]	0.0316941	0.00114348	1.71429	0.784665	222.243	177.757	2.20286	High	0.000959714	0.020202
High	[K].TSNSSQVSNEQDK.[I]	[N3]	Q5JRA6 [248-260]	0.0202941	0.000318248	1.33333	1.85759	121.95	234.45	2.05167	High	0.000240333	0.0118701
High	[K].TVTSASNNETYCR.[S]	[N8]	P25106 [185-197]	0.0340898	0.00135152	2	0.707047	234	166	1.59667	High	0.0010176	0.0251913
High	[K].TVTTSGTTNNTVTPTSQPVR.[K]	[N9]	Q04900 [138-157]	0.000933513	0.00013291	2.25	0.712251	232.875	167.125	3.43	High	0.00010245	0.000254304
High	[K].TVVTYHIPQNSSLENVDSR.[Y]	[N10]	O75144 [61-79]	0.00868372	0.000363459	1.25	0.896459	210.475	189.525	2.935	High	0.00027705	0.00359066
High	[K].TYNASVLPVR.[V]	[N3]	Q96S52 [368-377]	0.076937	0.00350345	1	0.689338	181.633	139.8	1.94	High	0.00271833	0.0490833
High	[K].TYNGTNPDAASR.[A]	[N3]	O60637 [125-136]	0.0277744	0.00100812	1	1.99402	133.5	266.5	1.555	High	0.0007625	0.019295
High	[K].VASVININPNTTHSTGSCR.[S]	[N10]	P13473 [248-266]	0.00350291	0.000126404	4	0.747624	176.829	137.257	4.37571	High	9.62571e-05	0.000648363
High	[K].VCNEDQTNCTVPTYPSCR.[D]	[N8]	Q9HBA0 [644-661]	0.00890098	0.000569009	1	0.722543	232.2	167.8	1.96	High	0.0004344	0.005929
High	[K].VDCTANTNTCNK.[Y]	[N8]	P30101 [83-94]	0.00012963	0	2.6	2.19298	92.94	206.86	3.464	High	0	0.000108192
High	[K].VEAEALNATAIR.[V]	[N7]	Q13332 [727-738]	0.0811397	0.00358704	1	0.916031	208.733	191.267	1.44	High	0.00277993	0.0658147
High	[K].VIDGTPCDQNGTAICVSGQCK.[S]	[N10]	Q6ZMP0 [364-384]	0.00442743	0.000177214	1.33333	0.711575	233.233	166.767	2.98667	High	0.0001366	0.00151744
High	[K].VIEEFYNQTWVHR.[Y]	[N7]	P11166 [39-51]	2.89246e-06	0	1	0.703235	233.975	166.025	3.41	High	0	2.32386e-06
High	[K].VLGQSQEPNVNPASAGNQTQK.[T]	[N17]	Q5VW38 [153-173]	1.77404e-05	0	1.5	1.25	177.25	222.75	3.53	High	0	4.78589e-05
High	[K].VNDSVPFHLGWNSTER.[S]	[N2; N12]	Q6NSJ0 [239-254]	0.00249896	0.00013291	1	0.678887	237.95	162.05	2.365	High	0.00010245	0.000827592
High	[K].VNNTAVIEK.[Q]	[N2]	Q9H330 [550-558]	0.00362557	0.000136608	2	1.59617	97.725	162.1	2.255	High	0.000104225	0.00219446
High	[K].VNVTVEDER.[T]	[N2]	P13726 [155-163]	0.0897537	0.00278394	1	1.85357	140.2	259.8	1.69	High	0.0020944	0.0566
High	[K].VPGNQTSTTLK.[L]	[N4]	P32004 [668-678]	0.0641168	0.0025635	1	1.78359	137.867	262.133	1.52333	High	0.00191567	0.0511253
High	[K].VSCPIMPCSNATVPDGECCPR.[C]	[N10]	P07996 [351-371]	0.0694164	0.00260128	1.33333	0.904977	209.933	190.067	1.76	High	0.0020414	0.0559633
High	[K].VSDNESSSNYTYK.[I]	[N4; N9]	Q12913 [388-400]	0.0433893	0.00208777	1	1.40154	156.625	243.375	2.06	High	0.0016407	0.0326426
High	[K].VVDDVSNQTSCR.[L]	[N7]	O75462 [286-297]	0.00902887	0.000221207	1	1.57916	154.825	245.175	2.29	High	0.00016845	0.0024165
High	[K].VVNSTTGPGEHLR.[N]	[N3]	P07996 [1065-1077]	2.18559e-07	0	1	0.515929	263.075	136.925	4.5375	High	0	7.45472e-07
High	[K].VVTQNSSSGNVTHEK.[I]	[N5; N10]	P43007 [197-211]	0.0252992	0.00100473	1	1.31648	170.7	229.3	2.304	High	0.0007492	0.0198388
High	[K].VYYNCSCIER.[K]	[N4]	Q6ZQN7 [541-550]	0.103018	0.00332194	1	1.22699	179.7	220.3	1.36	High	0.002532	0.03889
High	[K].WGHNITEFQQR.[F]	[N4]	Q96HE7 [277-287]	0.00333191	0	1.75	0.841928	142.9	120.475	2.8525	High	0.0001086	0.00329568
High	[K].WTGHNVTVVQR.[T]	[N5]	Q07954 [1507-1517]	0.000291065	0	1.5	1.15141	153.65	170.825	3.325	High	0	0.000145378
High	[K].YAESDPTVPCNETR.[W]	[N11]	Q14703 [138-151]	0.00314298	0	1	1.04239	195.6	204.4	2.22667	High	0	0.00172857
High	[K].YHVLHINTTK.[N]	[N7]	Q7LGA3 [102-111]	0.00200528	0.00013291	1.5	0.960846	172.6	164.85	2.05	High	0.00063795	0.0145798
High	[K].YIHQNYTK.[A]	[N5]	Q02809 [534-541]	0.0343952	0.00116731	1	1.39925	97.7333	138.867	2.05333	High	0.000883667	0.02468
High	[K].YPDVQNECRPCHENCTQGCK.[G]	[N6; N14]	P21860 [603-622]	0.0998346	0.00510094	1.5	1.20919	124.5	156.3	1.235	High	0.003958	0.083
High	[K].YRPENSVANDTGFTVVAPGK.[E]	[N9]	O60911 [213-232]	0.000158339	0	1.5	0.771605	225.75	174.25	2.925	High	0	8.21198e-05
High	[K].YSVANDTGFVDIPK.[Q]	[N5]	P07711 [217-230]	0.00212207	0	2	0.784929	222.425	177.575	2.665	High	0	0.00138486
High	[K].YTGNASALFILPDQDK.[M]	[N4]	P01011 [268-283]	7.75103e-05	0	2.25	1.49254	160.3	239.7	2.6425	High	0	3.43775e-05
High	[K].YVINGTYANETK.[L]	[N4; N9]	Q6PCB8 [210-221]	0.000101669	0	1	1.2945	115	154.25	2.485	High	0	3.9765e-05
High	[R].AACAVKPQEVQMVNGTITNPINGK.[S]	[N14]	P11717 [2123-2146]	0.00132588	0	1.5	1.00376	198.525	201.475	3.18	High	0	0.00209255
High	[R].AAGNTSESQSCAR.[S]	[N4]	Q86WC4 [132-144]	0.000989324	0	2.75	1.66528	128.15	213.225	3.07	High	0.000196325	0.0047655
High	[R].AASNFTEIK.[N]	[N4]	Q92673 [1703-1711]	0.0323385	0.00148567	1	1.72117	146.9	253.1	1.87	High	0.001126	0.02297
High	[R].ACTENNECCHPECLGSCSAPDNDTACVACR.[H]	[N22]	P08069 [223-252]	3.07526e-05	0	1	0.521921	262.35	137.65	3.67	High	0	1.23433e-05
High	[R].AEPPLNASASDQGEK.[V]	[N6]	Q9Y4L1 [926-940]	6.98226e-06	0	4.75	1.43062	99.725	140.4	3.2325	High	0	0.000111604
High	[R].AGPNGTLFVADAYK.[G]	[N4]	Q9HDC9 [157-170]	1.58133e-05	0	5.25	1.13058	119.85	132.575	4.075	High	0.00010245	0.00019152
High	[R].ALDPAGNESAYPPNGVECYSCVGLSR.[E]	[N7]	O95274 [123-148]	6.24803e-05	0	1.625	0.771084	225.188	174.812	3.945	High	0	3.47108e-05
High	[R].ALGFENATQALGR.[A]	[N6]	Q08380 [64-76]	0.00124587	0	1.75	0.893256	175.55	157.925	2.9375	High	0	0.00108649
High	[R].ALPGGADNASVASGAAASPGPQR.[S]	[N8]	O95502 [35-57]	6.73233e-06	0	1	0.750892	227.125	172.875	3.785	High	0	2.06723e-06
High	[R].ALQWNAGSGGLPENETTFAR.[I]	[N14]	P51689 [115-134]	0.0191547	0.000742835	1	0.515597	263.8	136.2	2.035	High	0.000563	0.0135983
High	[R].ANHSGAVVLLK.[R]	[N2]	P23229 [322-332]	0.00130934	0	1	1.04822	69.7	73	3.48	High	0	0.0006547
High	[R].ANQSWEDSNTDLVPAPAVR.[I]	[N2]	Q99988 [69-87]	0.0477675	0.00192473	1	0.750751	228.5	171.5	1.34	High	0.00145	0.03544
High	[R].ANTSALAVPSPVSNSASAR.[H]	[N2]	P55268 [1347-1365]	0.0211638	0.000431635	1	0.592944	249.825	150.175	2.515	High	0.000329	0.00721363
High	[R].ANYTILK.[G]	[N2]	Q02487 [391-397]	0.0208692	0.00201625	1	1.46199	162.5	237.5	2.02	High	0.001525	0.0149
High	[R].AQPGTMSNGTETR.[G]	[N8]	Q9UGT4 [487-499]	0.0379614	0.00206214	1.6	1.10302	144.9	161.8	2.61	High	0.00163128	0.0202434
High	[R].ATNSTATPSSTLGTTR.[I]	[N3]	Q9HC84 [4802-4817]	0.000119163	0	1.25	0.987411	199.5	200.5	3.035	High	0	6.48305e-05
High	[R].ATNSTYLNEK.[S]	[N3]	P61647 [64-73]	0.0746824	0.00398252	1	1.04877	64.2	66.85	2.04	High	0.0033395	0.0347415
High	[R].CAPVNISCYAK.[F]	[N5]	Q8WWI5 [176-186]	0.00388895	0.000177214	1.66667	1.38632	136.833	184.8	2.09667	High	0.0001366	0.001782
High	[R].CDQCEENYFYNR.[S]	[N11]	P11047 [1012-1023]	0.00802881	0.000215615	2	1.43885	127.14	177.64	2.44	High	0.00030716	0.00801667
High	[R].CDVCAEGFTGFPSCYPTPSSSNDTR.[E]	[N22]	O15230 [458-482]	1.88273e-06	0	1	0.767263	224.567	175.433	4.5	High	0	4.49834e-06
High	[R].CEICAPGFYGNALLPGNCTR.[C]	[N17]	O15230 [2003-2022]	0.0210845	0.00108165	1	0.928998	206.586	193.414	2.66571	High	0.0008454	0.0166057
High	[R].CLYGEAYPACSPGNTSTAEEELCR.[L]	[N14]	O76024 [733-756]	2.75005e-08	0	1.33333	0.773395	225.3	174.7	4.35667	High	0	1.29136e-07
High	[R].CNGSGTYVCGLCECSPGYLGTR.[C]	[N2]	P18084 [476-497]	0.00111589	0	1	0.969697	201.975	198.025	4.4525	High	0	0.000701177
High	[R].CPMAGISHTAWHSNR.[T]	[N14]	Q9UMR5 [276-290]	0.00104982	0	1	0.734394	230.633	169.367	2.88667	High	0	0.00058337
High	[R].CPNGTCIPSSK.[H]	[N3]	Q92673 [1244-1254]	0.00659126	0.000182144	1.33333	1.78678	44.8333	80.1667	1.70667	High	0.000138967	0.00418047
High	[R].CRPGSFGNATGSR.[G]	[N8]	Q7Z7M0 [1194-1206]	0.0872616	0.00370392	1	0.764916	226.633	173.367	1.23667	High	0.00278667	0.0539843
High	[R].DAGVGFPEYQEEDNSTYNFR.[W]	[N14]	P11717 [734-753]	0.00602346	0.000126404	1.85714	1.49989	158.071	241.929	2.94286	High	9.62571e-05	0.00142994
High	[R].DAGVVCTNETR.[S]	[N8]	Q08380 [118-128]	0.000727477	0	1.33333	2.32378	94.1667	211.333	2.42333	High	0	0.00040865
High	[R].DCVLQCEEQNCSGGALNHFR.[S]	[N10]	Q96FM1 [31-50]	0.00738972	0.000504062	1	1.44196	157.75	242.25	2.605	High	0.00038125	0.0054187
High	[R].DCVSNGSLGCPVR.[L]	[N5]	Q9HCN3 [228-240]	0.000383827	0	1	1.31883	111.15	144.525	2.8775	High	0	0.000144171
High	[R].DDAGNYTCIASNGPQGQIR.[A]	[N5]	Q13308 [563-581]	0.00429645	0.00013943	1.5	0.933925	187.788	178.387	2.6325	High	0.000157638	0.00274347
High	[R].DFQHLLNR.[T]	[N7]	Q13444 [231-238]	0.0589056	0.00252427	1.25	0.974421	180.2	177.25	2.4975	High	0.00342025	0.0497485
High	[R].DGTPLSDGQSNHTVSSK.[E]	[N11]	Q13308 [165-181]	3.80699e-05	0	1	0.812348	220.7	179.3	2.54	High	0	3.82763e-05
High	[R].DHHGANFSCR.[T]	[N6]	P05362 [178-187]	0.000780799	0	1.25	1.34048	86.725	112.95	3.12	High	0	0.0004017
High	[R].DHPNATVWR.[K]	[N4]	Q9UMR5 [203-211]	0.0119769	0.000221207	2.5	0.893056	147.3	137.875	2.645	High	0.00016845	0.00462875
High	[R].DHVHCLGNR.[T]	[N8]	Q9BRN9 [162-170]	0.00714918	0.000273217	1	0.754717	75.85	56.95	2.01	High	0.00020845	0.0043995
High	[R].DINSQQELQNITTDTR.[F]	[N10]	P10586 [957-972]	8.03194e-10	0	2.25	1.0596	193.425	206.575	4.5075	High	0	5.96732e-07
High	[R].DIYTFDGALNK.[S]	[N10]	Q08722 [64-74]	0.000211046	0	3	1.24844	101.9	128.35	3.1	High	0	0.000170304
High	[R].DLASSENGTECR.[S]	[N7]	O95196 [349-360]	0.00680425	0.00013291	1	0.686577	237.05	162.95	2.275	High	0.00010245	0.00331555
High	[R].DLGPTLANSTHHNVR.[L]	[N8]	P04062 [302-316]	5.37865e-05	0	2.25	0.674082	238.825	161.175	3.18	High	0	2.64375e-05
High	[R].DLQANDTGR.[Y]	[N5]	P32004 [486-494]	0.0628976	0.00280443	1	2.21729	85.2	186.375	1.7725	High	0.00216995	0.0484045
High	[R].DMNQTLGDNITVK.[M]	[N9]	Q8TCT8 [147-159]	0.0565333	0.00202475	1.14286	0.682527	236.057	163.943	1.79714	High	0.00152256	0.0401
High	[R].DNATLQATLHAAR.[D]	[N2]	O15230 [2422-2434]	6.42383e-05	0	1	0.952381	204.075	195.925	3.4825	High	0	2.84041e-05
High	[R].DNHTHSDIQVK.[L]	[N2]	Q8IV08 [386-396]	0.00110472	0	1	1.5748	72.05	111.975	1.8625	High	0	0.00061905
High	[R].DPCSNVTCSFGSTCAR.[S]	[N5]	O00468 [246-261]	3.18843e-06	0	1.25	1.0846	191.6	208.4	4.2475	High	0	2.78715e-06
High	[R].DPYCAWSVNTSR.[C]	[N9]	Q9C0C4 [514-525]	0.0133651	0.000294943	1	0.53831	260.033	139.967	2.14667	High	0.0002246	0.00592833
High	[R].DSEAFCHANCSGPAPAAKPDPDGGR.[A]	[N9]	Q92791 [71-95]	0.0084624	0.000273217	1	0.894055	210.3	189.7	1.57	High	0.00020845	0.005475
High	[R].DVMQVANTTMSSR.[S]	[N7]	P08069 [741-753]	0.00813546	0.000371417	1	0.438212	277.9	122.1	2.24	High	0.0002815	0.00567201
High	[R].DVNCSVMGPQEK.[K]	[N3]	P53634 [51-62]	7.84998e-05	0	2	1.10173	145.7	158.067	2.9	High	0	0.00128798
High	[R].EACQGTSPPVVSCYNASDHVYK.[G]	[N15]	O95274 [149-170]	1.09469e-08	0	4.25	1.14548	165.85	189.025	4.2975	High	0	1.16562e-07
High	[R].EADNHTAFIR.[I]	[N4]	Q92545 [287-296]	0.000567405	0	1.33333	0.918274	162.833	148.233	2.85	High	0	0.000559067
High	[R].EAGNHTSGAGLVQINK.[S]	[N4]	P20645 [80-95]	0.00226089	0.00013291	2	1.13993	184.7	215.3	3.0725	High	0.00010245	0.000647665
High	[R].EAINITLDHK.[C]	[N4]	O00469 [206-215]	0.00302284	0.000142252	1	0.976801	143	141.4	2.1775	High	0.0001086	0.00195214
High	[R].EASIVGENETYPR.[A]	[N8]	Q9UBV2 [601-613]	0.00278273	0	2.75	1.06667	148.7	148.3	2.7875	High	0	0.00161966
High	[R].EEAMLYHNQTAELR.[E]	[N8]	Q92791 [354-367]	0.0052868	0	1	1.05597	194.55	205.45	1.635	High	0	0.0030685
High	[R].EEQFNSTYR.[V]	[N5]	P01861 [173-181]	0.0700361	0.0027564	1.33333	1.51745	158.933	241.067	1.88333	High	0.00205793	0.046519
High	[R].EERPLNASALK.[L]	[N6]	O14657 [59-69]	0.10264	0.00338723	1.5	1.60901	54.9	87.95	1.975	High	0.003021	0.07288
High	[R].EETLLYDSNTSSMADR.[K]	[N9]	Q9UIQ6 [440-455]	0.000757505	0	2	1.24185	153.562	189.513	2.85875	High	0	0.000501523
High	[R].EGICNGFTALCPASDPKPNFTDCNR.[H]	[N19]	O14672 [533-557]	0.0194473	0.000772791	1.63636	1.1244	186.155	213.845	2.85182	High	0.00140493	0.0252932
High	[R].ELAVPDGYTNR.[T]	[N10]	P26006 [77-87]	0.0135436	0.000269519	1.75	1.01937	197.15	202.85	2.0525	High	0.00035155	0.013593
High	[R].ELQGNCSR.[L]	[N5]	Q07954 [110-117]	0.0821941	0.00288627	1	2.34742	119.5	280.5	1.38	High	0.002142	0.06191
High	[R].ELYNGTADITLR.[F]	[N4]	Q92508 [2291-2302]	0.0585183	0.00180944	1	1.10619	189.85	210.15	1.5	High	0.0013624	0.0342305
High	[R].ENATVPENEEEIIR.[K]	[N2]	Q8IWB1 [26-39]	0.00263716	0	1.25	1.49421	160.35	239.65	2.4775	High	0	0.00146089
High	[R].ENVGIYNLSK.[G]	[N7]	Q5JPE7 [612-621]	0.0275766	0.00136491	1.75	1.4498	115.2	182.625	2.4775	High	0.0010125	0.0215041
High	[R].EQINITLDHR.[C]	[N4]	Q02809 [194-203]	2.50815e-05	0	1	0.824402	174.067	141.933	3.55333	High	0	8.611e-06
High	[R].EQQLESCACNETDNSCK.[V]	[N10]	P78536 [585-601]	0.0100745	0.000492502	1.28571	1.68919	147.986	252.014	2.81	High	0.000373671	0.00486825
High	[R].ERPPTFLTPEGNASNK.[E]	[N12]	Q92823 [265-280]	0.000279358	0	2	0.786782	223.9	176.1	2.09	High	0	0.0001807
High	[R].ESWGQESNAGNQTVVR.[V]	[N11]	Q9NY97 [163-178]	2.72301e-05	0	1.6	0.915416	205.34	194.66	2.828	High	0	1.81635e-05
High	[R].ETCSGNSSQCAPNIHK.[M]	[N6]	Q9P0K1 [514-529]	0.0223907	0.00201625	1	0.958773	204.3	195.7	1.8	High	0.001525	0.01611
High	[R].FGTCSQLCNNTK.[G]	[N9]	Q07954 [3831-3842]	0.00159309	0	1.66667	2.04221	101.467	204.267	2.53333	High	0	0.000841993
High	[R].FINYNQTVSR.[M]	[N5]	Q8N766 [909-918]	0.055278	0.00213465	1	0.596837	175	94.45	1.6	High	0.001607	0.04219
High	[R].FNHTQTIQQK.[Q]	[N2]	Q92823 [222-231]	0.0158079	0.000221207	1	0.773545	115.2	88	2.61	High	0.00016845	0.00522949
High	[R].FNPNISWQPIPVHTVPITEDR.[L]	[N4]	P11117 [130-150]	2.0487e-05	0	1.42857	0.913242	190.343	177.129	3.60857	High	0	1.70869e-05
High	[R].FNSTEYQVVTR.[V]	[N2]	Q07954 [445-455]	0.0746894	0.00332879	1.33333	1.31926	138.767	190.167	2.31333	High	0.00258827	0.0605783
High	[R].FNVSLDSVPELR.[W]	[N2]	Q02083 [36-47]	0.00580882	0.000269519	1.5	0.706839	193.8	140.7	2.505	High	0.000206675	0.00343045
High	[R].FQVNNTRPPHVQLLR.[K]	[N4]	P35475 [369-383]	0.00182736	0	1.33333	0.866051	113.2	97.7667	2.68	High	0	0.00111605
High	[R].FSGVNDTDFR.[V]	[N5]	Q9UKY4 [579-588]	0.0271314	0.000958737	1	1.24275	90.8333	113.667	1.36667	High	0.0007246	0.0190787
High	[R].FTFTSHTPGDHQICLHSNSTR.[M]	[N18]	Q7Z7H5 [100-120]	0.000254272	0	1.5	0.533049	260.8	139.2	3.4825	High	0	0.00012051
High	[R].GANDSTSAMPEQMK.[F]	[N3]	O95084 [205-218]	0.000159687	0	1.5	1.29199	113.125	147.3	2.6475	High	0	8.71158e-05
High	[R].GDKNVTMGQSSAR.[M]	[N4]	P48960 [368-380]	0.0459474	0.00185302	1.2	1.36949	128.1	179.34	1.782	High	0.00144532	0.0311364
High	[R].GFQWVTGDNNTSYSR.[W]	[N9] Or [N10]	P07204 [107-121]	0.00238824	0.000177214	2	1.24896	177.4	222.6	2.64667	High	0.0001366	0.000867133
High	[R].GGGDPWTNGSGLALCQR.[Y]	[N8]	Q9GZU1 [152-168]	0.00547542	0.00025925	2	0.820008	219.525	180.475	2.4725	High	0.000196325	0.00371523
High	[R].GHCWGPGPTQCVNCSQFLR.[G]	[N13]	P04626 [518-536]	0.00264261	0	1.25	0.769379	225.8	174.2	3.4575	High	0	0.00154773
High	[R].GHPQILEAAGNASAGTVLLR.[W]	[N11]	Q13332 [930-949]	1.91456e-06	0	1	0.823215	219.125	180.875	3.5875	High	0	6.31891e-07
High	[R].GHTLTLNFTR.[N]	[N7]	P11279 [97-106]	0.000942704	0	3	0.838574	188.475	157.875	3.035	High	0	0.000449975
High	[R].GICNSSDVR.[G]	[N4]	O75882 [297-305]	0.0125021	0.000504328	1	1.3624	168.975	231.025	1.525	High	0.00038395	0.00776875
High	[R].GNHTQSALLAGLR.[K]	[N2]	Q7Z5N4 [1332-1344]	0.000177369	0	1	0.801282	148.9	113.35	3.77	High	0	0.00010501
High	[R].GNITEYQCHQYITK.[M]	[N2]	Q92896 [209-222]	0.00806196	0	1	1.9305	136.5	263.5	1.8	High	0	0.004985
High	[R].GNVTQHVQGHR.[N]	[N2]	Q15043 [76-86]	0.000139516	0	1.5	0.641746	187.675	119.75	3.5325	High	0	6.981e-05
High	[R].GPECSQNYTTPSGVIK.[S]	[N7]	O14786 [144-159]	0.00263638	0	1.75	1.14416	186.35	213.65	2.6725	High	0.00059125	0.0153823
High	[R].GSEGGNGSNPVAGLETDDHGGK.[A]	[N6]	Q8TBP5 [78-99]	0.0276652	0.00136635	1.2	0.975419	145.02	140.94	3.062	High	0.001103	0.0123928
High	[R].GSSVILNCSAYSEPSPK.[I]	[N7]	Q92859 [67-83]	0.0738824	0.00288627	1	0.67981	238.1	161.9	1.55	High	0.002142	0.05507
High	[R].GVFITNETGQPLIGK.[V]	[N6]	P10253 [465-479]	0.0117337	0.000256165	1.5	1.20012	175.175	224.825	2.5575	High	0.0005733	0.01415
High	[R].GVYELTHNNK.[T]	[N9]	Q7Z388 [115-124]	0.0483751	0.00201456	2	1.00376	132.9	135.275	1.6525	High	0.0022212	0.054204
High	[R].GWSCTDNSTAQTVAQQR.[A]	[N7]	Q9HCN3 [529-545]	0.025977	0.00087843	1.5	0.87241	213.35	186.65	2.0225	High	0.00065875	0.020507
High	[R].GYQGDGISHCNR.[T]	[N11]	Q7Z7M0 [1105-1116]	0.000271505	0	1	0.891266	69.2	61.7	2.45	High	0	0.0001774
High	[R].GYYNQSEAGSHTLQR.[M]	[N4]	Q95604 [107-121]	8.00932e-06	0	2	1.16381	183.95	216.05	3.395	High	0	1.01498e-05
High	[R].GYYNQSEAGSHTVQR.[M]	[N4]	P01892 [107-121]	2.67235e-08	0	1	1.46628	60.925	93.525	3.925	High	0	1.77915e-08
High	[R].HEEGHMLNCTCFGQGR.[G]	[N8]	P02751 [535-550]	0.0226683	0.00111106	1.8	0.875197	213	187	2.148	High	0.00153376	0.0382761
High	[R].HFNDSGACVPR.[C]	[N3]	P21860 [248-258]	0.000116766	0	1.25	0.734889	207.2	152.85	3.4675	High	0	5.90675e-05
High	[R].HLELAGENPSSDINCTK.[V]	[N14]	Q02742 [45-61]	0.0366361	0.00141438	1	0.823271	219.1	180.9	2.01667	High	0.00105593	0.023739
High	[R].HLNSTDDADR.[I]	[N3]	Q9Y2G5 [257-266]	0.0228968	0.000756345	1.25	0.641128	200.25	131.85	2.1425	High	0.0009433	0.025034
High	[R].HPGNFSSLSCDYFAVNQSR.[L]	[N4; N16]	P08648 [709-727]	0.000436814	0	1.33333	0.750188	183.067	132.067	3.15	High	0	0.000208475
High	[R].HPVNECAPYQR.[S]	[N4]	Q3MIR4 [142-152]	0.000351224	0	1.25	0.824063	218.35	181.65	3.435	High	0	0.00017915
High	[R].HRPTAGAFNHSDLDAELR.[R]	[N9]	P09758 [160-177]	0.00247148	0	1.75	0.832813	218	182	2.3275	High	0	0.0014384
High	[R].HVVYWNSSNPR.[L]	[N6]	P52798 [28-38]	0.00656835	0.000177214	1	0.688863	236.467	163.533	2.63333	High	0.0001366	0.0017959
High	[R].IAPASNVSHTVVLRPLK.[A]	[N6]	P43308 [83-99]	0.00171251	0	3.5	0.825423	134.75	110.5	2.44	High	0.0001086	0.00229314
High	[R].ICPQGYTCCTSEMEENLANR.[S]	[N19]	P35052 [61-80]	4.40786e-05	0	1.33333	0.713946	233.067	166.933	3.92333	High	0	3.66394e-05
High	[R].IETILLNGTDR.[K]	[N7]	Q07954 [723-733]	0.147703	0.00923621	1	1.32626	172	228	1.38	High	0.007163	0.1197
High	[R].IEVANLNGTSR.[K]	[N7]	O75197 [132-142]	0.107122	0.00502366	2	1.14548	186.4	213.6	2.02	High	0.003746	0.08646
High	[R].IFENADNGTTVIR.[L]	[N7]	Q9UN73 [251-263]	0.0112695	0.000177214	1	0.681044	237.867	162.133	2.05	High	0.0001366	0.00681553
High	[R].IHNVTASDSGK.[Y]	[N3]	O00478 [113-123]	0.000613453	0	1	0.867052	213.867	186.133	2.25333	High	0	0.000329933
High	[R].ILAPELSHANATR.[N]	[N10]	P51168 [126-138]	0.00984883	0.000558275	1	0.606061	248.1	151.9	1.97	High	0.0004257	0.00698784
High	[R].ILCDNADNITR.[V]	[N8]	Q92626 [1273-1283]	0.00813083	0	1	1.34892	169.667	230.333	2.29333	High	0	0.00501857
High	[R].INTTADEKDPTNPFR.[F]	[N2]	O14672 [277-291]	0.00234548	0	1	1.23711	178.5	221.5	1.59667	High	0	0.00127717
High	[R].IVCVTSPAPNGTTGPVR.[V]	[N10]	Q9ULL4 [891-907]	0.019408	0.000345667	1.33333	0.702412	234.767	165.233	2.01667	High	0.000261767	0.0131463
High	[R].IVSPEPGGAVGPNLTCR.[W]	[N13]	Q6UXD5 [361-377]	0.000168653	0	1.75	1.35135	140.825	186.075	3.28	High	0	8.25488e-05
High	[R].KDNTTVTR.[L]	[N3]	P11279 [247-254]	0.0419799	0.00133145	2.25	1.6129	60.975	97.95	2.1025	High	0.00471275	0.07538
High	[R].KENSSEICSNNGECVCGQCVCR.[K]	[N3]	P05556 [518-539]	0.00170689	0	2	1.40805	161.93	238.07	3.889	High	0	0.00110568
High	[R].KGFCEAPGNR.[T]	[N9]	P27701 [190-199]	0.0372053	0.00149743	1	0.962464	161.967	161.133	2.74667	High	0.00112057	0.0269533
High	[R].KNASNMEYR.[I]	[N2]	Q9Y639 [196-204]	0.00471444	0.000204036	1.25	1.5534	67.375	102.388	3.01	High	0.00015675	0.00249751
High	[R].KNISIHQAYQQCK.[E]	[N2]	Q8N271 [539-551]	0.00113875	0	1	1.02145	137.85	142.6	2.865	High	0	0.00061785
High	[R].KNITDLVEGAK.[K]	[N2]	Q8IWA5 [199-209]	0.00427026	0.000136608	3	1.23724	178	222	2.73	High	0.000104225	0.00274012
High	[R].KNNTYLVK.[R]	[N2]	Q6P4E1 [149-156]	0.0709371	0.00277569	1.33333	1.49031	89.1	126.8	2.67333	High	0.0027741	0.0591533
High	[R].KNYNNTWTR.[L]	[N4]	O75054 [652-660]	0.0557261	0.00229576	1	1.06952	193.3	206.7	1.55	High	0.001723	0.04198
High	[R].KTNESVSEPR.[K]	[N3]	Q13433 [239-248]	0.00167984	0	1.25	0.99108	133.275	127.4	2.935	High	0	0.000987983
High	[R].LANLTQGEDQYYLR.[V]	[N3]	P10909 [372-385]	0.00059059	0	2.5	0.978713	201.425	198.575	2.8825	High	0	0.000346741
High	[R].LCDEGHGLEVEINCTR.[T]	[N13]	P25445 [106-121]	0.00365704	0	1.25	0.843882	216.875	183.125	2.38	High	0	0.0021598
High	[R].LENITTGTYTIHAQK.[E]	[N3]	Q5JPE7 [367-381]	0.00189425	0	1	1.20724	180.9	219.1	2.57667	High	0	0.00119336
High	[R].LFNVTPQDEQK.[F]	[N3]	O75144 [100-110]	0.00991785	0.000504062	1.25	0.926784	176.475	158.625	2.5325	High	0.00038125	0.00670505
High	[R].LFPNASQHITPSYNYAPNPDK.[H]	[N4]	Q8IWU5 [238-258]	7.73494e-05	0	1	1.81159	125.85	225.433	3.60167	High	0	4.23167e-05
High	[R].LGQAPANWYNDTYPLSPPQR.[T]	[N10]	Q8WVQ1 [79-98]	0.00012383	0	1.6	0.660066	240.72	159.28	3.742	High	0	6.57864e-05
High	[R].LHEITNETFR.[G]	[N6]	Q6EMK4 [112-121]	0.00134128	0	1.5	0.573806	232.9	135.75	2.9075	High	0	0.000738675
High	[R].LLANSSMLGEGQVLR.[S]	[N4]	Q6UXD5 [244-258]	0.000572904	0	1.75	1.00692	185.1	185.363	2.85125	High	0	0.000301143
High	[R].LLNCTAPGPDAAAR.[C]	[N3]	Q8N697 [138-151]	9.37918e-05	0	2.33333	0.92081	175.733	163.5	3.06667	High	0	5.55133e-05
High	[R].LNAINITSALDR.[G]	[N5]	O43556 [196-207]	0.0696415	0.00351424	1	0.957549	204.267	195.733	1.63333	High	0.00273267	0.0570664
High	[R].LNASIADLQSQLR.[S]	[N2]	O15230 [2208-2220]	0.000163994	0	1.75	1.11669	188.375	211.625	3.1475	High	0	7.8494e-05
High	[R].LNGTDPIVAADSK.[R]	[N2]	Q07954 [4074-4086]	0.00906363	0.000221207	2	1.33869	169.75	230.25	1.96	High	0.0006342	0.0135801
High	[R].LNPTVTYGNDSFSAK.[A]	[N9]	P05362 [259-273]	0.0353518	0.00217749	1	1.30919	171.7	228.3	1.76333	High	0.00167643	0.0269999
High	[R].LNTTGVSAGCTADLLVGR.[A]	[N2]	O15230 [3106-3123]	0.000855678	0	1.25	0.674764	237.5	162.5	2.7075	High	0	0.00044299
High	[R].LPNNHSTASPLGMPHGAAAFVDTCSGDK.[M]	[N4]	Q14573 [2402-2429]	0.00212175	0.000177214	1.33333	0.976562	201.667	198.333	2.63667	High	0.0001366	0.000498143
High	[R].LSQAQGNLSVLETR.[Q]	[N7]	O75054 [819-832]	0.000261512	0	2	1.27551	136.65	172.125	3.3075	High	0	0.000119491
High	[R].LTIVNSSVLDRPR.[A]	[N5]	Q92673 [867-879]	0.0296426	0.000942467	1.33333	1.25104	177.633	222.367	1.57667	High	0.000710933	0.019978
High	[R].LYANHTSLPASAR.[E]	[N4]	Q9NRB3 [277-289]	0.000632575	0	1	0.653381	152.4	99.1	2.47	High	0	0.00030595
High	[R].MDPPCTNTTAASTYLNNPYVR.[K]	[N7]	P10619 [327-347]	0.000672782	0	1.8	1.12982	186.56	213.44	3.418	High	8.267e-05	0.00160135
High	[R].MSVINFECNK.[T]	[N9]	P11717 [427-436]	0.0181975	0.000849103	1	1.25078	177.275	222.725	1.8375	High	0.0006418	0.0118525
High	[R].NASHLVCSACFGPCAR.[C]	[N1]	Q96HD1 [205-220]	3.99431e-05	0	1.66667	0.68306	236.2	163.8	3.34667	High	0	1.75983e-05
High	[R].NCSAAPQPEPAAGLASYPELR.[L]	[N1]	O75718 [87-107]	5.06789e-05	0	1	0.988142	201.2	198.8	3.25	High	0	1.913e-05
High	[R].NCSFEDDNIR.[S]	[N1]	Q4G148 [387-396]	0.00945916	0	1	0.742115	171.1	124.6	1.705	High	0	0.005876
High	[R].NCSTITLQNITR.[G]	[N1; N9]	Q14118 [641-652]	0.00134306	0	1.5	0.584795	250.65	149.35	2.7675	High	0	0.000688975
High	[R].NDTASYK.[C]	[N1]	P06731 [208-214]	0.0469236	0.00107647	1	1.69779	61.2667	102.167	2.34667	High	0.0008126	0.02438
High	[R].NDTLQEAK.[E]	[N1]	Q92896 [786-793]	0.0160432	0.00101775	1	2.185	64.0667	139.4	2.38667	High	0.0007701	0.0110939
High	[R].NETHSICTACDESCK.[T]	[N1]	Q6UXH1 [190-204]	0.024744	0.00101364	1.66667	1.19617	180.9	219.1	2.56667	High	0.0007644	0.02162
High	[R].NFSTCSPSTK.[T]	[N1]	P07949 [554-563]	0.0234652	0.000953031	1.5	0.924642	207.35	192.65	1.755	High	0.000719425	0.017686
High	[R].NGSSIVDLSPLIHR.[T]	[N1]	P11717 [1656-1669]	2.41836e-05	0	1	1.0395	196.2	203.8	3.6	High	0	8.515e-06
High	[R].NHSCSEGQISIFR.[Y]	[N1]	O75882 [731-743]	0.00464562	0.000136608	1	0.784929	223.4	176.6	2.645	High	0.000104225	0.00306297
High	[R].NHSIFLADINQER.[G]	[N1]	P50897 [197-209]	0.0121189	0.00040229	2.6	0.978665	178.84	178.96	3.292	High	0.0002996	0.00882414
High	[R].NHTWLPVSDDACYR.[E]	[N1]	P15529 [83-96]	0.0095724	0.000366883	1	0.679964	237.9	162.1	1.75667	High	0.0002814	0.00580103
High	[R].NISQVLEK.[K]	[N1]	O14672 [439-446]	0.0189755	0.00070685	1	2.25352	122.1	277.9	2.3125	High	0.0005332	0.0122147
High	[R].NITAQLPTK.[G]	[N1]	Q04771 [102-110]	0.00764049	0.000411771	1	0.894055	210.95	189.05	2.1975	High	0.000315275	0.00418407
High	[R].NLHQSNTSR.[A]	[N6]	P98160 [1750-1758]	0.0169937	0.000719053	1	0.954198	176.675	166.45	2.295	High	0.00054345	0.0114223
High	[R].NLSAPVTLNLR.[D]	[N1]	O00754 [930-940]	0.0378808	0.00163453	1	0.842933	177.867	145.6	1.96	High	0.00122593	0.0245447
High	[R].NLSVDGK.[N]	[N1]	Q9NYQ6 [1623-1629]	0.15109	0.00791549	1	1.80668	52.9	96.35	1.82	High	0.0061315	0.100355
High	[R].NLTEVPTDLPAYVR.[N]	[N1]	Q13641 [81-94]	0.000514338	0	2.5	0.704225	234.4	165.6	2.805	High	0	0.00100368
High	[R].NLTQPEVIIQPSSR.[H]	[N1]	Q8N0Z9 [347-360]	4.86194e-05	0	1	0.97561	164.325	163.875	3.0275	High	0	2.86062e-05
High	[R].NNSNNFDLNR.[N]	[N1]	O75976 [626-635]	0.0114569	0.000442414	1	1.46843	109.65	167.1	1.525	High	0.0003369	0.003451
High	[R].NPCTSEQNCTSPFSYK.[N]	[N8]	P05556 [205-220]	0.0111628	0.000147471	2	1.74622	126.883	223.883	2.66	High	0.0001123	0.00328857
High	[R].NPNGTVTVISR.[Y]	[N3]	Q15223 [200-210]	0.0414791	0.00100069	2	0.57323	254.25	145.75	2.375	High	0.0036197	0.039685
High	[R].NQNESVSEIGGK.[I]	[N3]	Q68CR1 [525-536]	0.0590526	0.00290225	1.33333	1.44092	122.033	176.767	1.92	High	0.00231567	0.0293868
High	[R].NQSLVQDMDSMVR.[L]	[N1]	Q8NHP8 [465-477]	0.000231942	0	1.57143	1.08763	155.514	163.2	2.82857	High	0	0.000934655
High	[R].NSSHSPLR.[T]	[N1]	Q92854 [191-198]	0.00867667	0.00052288	1	0.551167	257.733	142.267	2.19333	High	0.000398367	0.00536863
High	[R].NSTIEAANLAGLK.[I]	[N1]	P48723 [184-196]	0.00010039	0	1.2	1.08131	165.72	182.48	2.55	High	0	5.80456e-05
High	[R].NTNENPQECFNASK.[L]	[N11]	Q13433 [256-269]	0.0237627	0.00119762	1.85714	0.917551	208.171	191.829	2.31	High	0.000958371	0.0200637
High	[R].NTSAASTAQLVEATEELR.[R]	[N1]	P55268 [1249-1266]	0.00241704	0	1	0.733407	230.45	169.55	1.975	High	0	0.00129595
High	[R].NTSWDNAGFK.[G]	[N1]	P78536 [264-273]	0.000870247	0	1	1.23153	179.1	220.9	2.35	High	0	0.000523855
High	[R].NTTEVVNTMCGYK.[T]	[N1]	O95858 [189-201]	0.000428003	0	1.88889	1.21951	164.522	198.944	2.74222	High	0	0.000235578
High	[R].NTTIFLK.[F]	[N1]	Q8NBN3 [62-68]	0.103066	0.00475885	1	1.28866	129.433	169.2	1.83333	High	0.00358033	0.0652533
High	[R].NWTAAASPSAVFATR.[H]	[N1]	Q9NZV5 [190-204]	0.000455824	0	1.66667	0.93838	205.433	194.567	3.46333	High	0	0.0002127
High	[R].NYTAEEK.[I]	[N1]	P22303 [495-501]	0.0309315	0.00201625	1	1.34228	170.7	229.3	2.2	High	0.001525	0.02278
High	[R].QGEHLSNSTSAFSTR.[S]	[N7]	Q92626 [1362-1376]	3.40533e-05	0	1	0.848356	216.075	183.925	3.225	High	0	1.85305e-05
High	[R].QNQSLVYGK.[V]	[N2]	Q09328 [446-454]	0.0635018	0.00301432	1	0.852878	215.9	184.1	1.71	High	0.0022422	0.04896
High	[R].QTECMVEQYSNYSVNGEPVNGR.[H]	[N11]	P42892 [641-662]	0.00329716	0.000113802	1.2	0.725163	231.54	168.46	2.748	High	8.688e-05	0.00225501
High	[R].QTMIDFLQNHTEGSRPPACPR.[L]	[N9]	Q6ZRP7 [170-190]	0.00054745	0	1.25	0.66346	238.225	161.775	2.3525	High	0	0.00027275
High	[R].QTNPSAMEVEEDDPVPEIR.[R]	[N3]	P55072 [714-732]	0.0254666	0.000442414	1	0.91659	206.35	193.65	2.575	High	0.0003369	0.00625242
High	[R].QTPEYQNESSR.[N]	[N7]	P11117 [171-181]	0.0629482	0.00294962	1.66667	1.23813	178.233	221.767	1.76	High	0.00229813	0.0501777
High	[R].QVLNITDK.[D]	[N4]	P22223 [563-570]	0.0222534	0.000760227	1	1.81488	120.3	213.525	1.89	High	0.0005733	0.0156981
High	[R].QVQLECVVLNR.[T]	[N10]	O75054 [833-843]	0.03002	0.000884829	1	1.35685	169.8	230.2	2.34	High	0.0006738	0.005882
High	[R].QVVENMTR.[A]	[N5]	P10253 [386-393]	0.101783	0.00351372	1	1.49701	65.2	97.6	1.37	High	0.002635	0.08251
High	[R].RNESHLIDFR.[E]	[N2]	Q9UJ14 [197-206]	0.00730479	0	1	0.712251	233.6	166.4	2.71	High	0	0.0042965
High	[R].RNQSLSLLYK.[V]	[N2]	Q06481 [540-549]	0.00202162	0	1	1.14449	186.125	213.875	3.8375	High	0	0.0012385
High	[R].RPNQSQPLPPSSLQR.[F]	[N3]	Q92542 [415-429]	0.00164835	0	4.25	0.749766	228.5	171.5	2.94	High	0	0.00157485
High	[R].RPPLAELAALNLSGSR.[L]	[N11]	Q13641 [114-129]	7.03741e-06	0	2	0.540833	258.733	141.267	4.02	High	0	2.10427e-06
High	[R].RPYVSYVNNSIAR.[N]	[N8]	Q9Y2E5 [741-753]	0.0518557	0.00156268	1.33333	0.62461	243.767	156.233	2.15	High	0.00117443	0.0391633
High	[R].SANSTLAQALHWTR.[S]	[N3]	Q9BU23 [614-627]	0.0119863	0.000412048	1.25	0.708968	233.575	166.425	1.9775	High	0.0003153	0.00678103
High	[R].SDEYNCSSGMCIR.[S]	[N5]	Q92673 [1160-1172]	0.00290385	0.000136608	1.25	1.53022	108.725	163.05	2.21	High	0.000196325	0.0041125
High	[R].SDFSQTMLFQANTTR.[I]	[N12]	P23470 [433-447]	0.0060899	0.000531641	1	0.537057	260.2	139.8	2.11	High	0.0004098	0.001207
High	[R].SDLNPANGSYPFQALR.[Q]	[N7]	Q8NHP8 [509-524]	7.38388e-06	0	2.25	0.803213	187.5	150.325	3.305	High	0	9.87853e-06
High	[R].SEASEGNITVTCR.[A]	[N7]	Q29983 [214-226]	0.0276683	0.00118958	1.75	0.616428	212.5	130.1	1.8375	High	0.00146925	0.0416706
High	[R].SEQLVNFTGK.[A]	[N6]	Q9BVX2 [181-190]	0.0499077	0.00172734	1	0.854214	160.267	154.467	1.85667	High	0.00128833	0.0375917
High	[R].SGEDESQEDVLMDEAPSNLSQASTLQANR.[E]	[N18]	Q7Z6Z7 [2372-2400]	4.55043e-05	0	1.25	0.850521	215.5	184.5	3.9875	High	0	2.12612e-05
High	[R].SGWTGEYCNCTTSTDSCVSEDGVLCSGR.[G]	[N9]	P18564 [567-594]	0.000612465	0	1	2.3166	120.2	279.8	3.47333	High	0	0.000338633
High	[R].SLLEFNTTVSCDQQGTNHR.[V]	[N6]	P11717 [107-125]	0.0323388	0.00122833	1	0.744971	161.2	127.6	1.49667	High	0.000924933	0.0223123
High	[R].SPIVTHCNVSTVNK.[G]	[N8]	Q9UN76 [167-180]	5.95605e-06	0	1	0.803428	132	104.067	3.17333	High	0	8.1488e-06
High	[R].SQNDTVTPDVWYTSKPK.[E]	[N3]	Q9BTY2 [375-391]	0.0023471	0	1.33333	1.58144	154.8	245.2	2.66333	High	0	0.00152039
High	[R].SVNPNDTCLASCVK.[S]	[N5]	O95857 [133-146]	4.10494e-06	0	2	1.05485	133.425	139.85	3.45	High	0	9.59108e-05
High	[R].SVTSNQSDGTQESCESPDVLDR.[H]	[N5]	Q9UGV2 [346-367]	0.0143792	0	1	0.609385	248.5	151.5	1.58	High	0	0.008846
High	[R].SVYNCSGEACR.[G]	[N4]	P54802 [500-510]	0.0162863	0.00103144	1.33333	1.43885	163.933	236.067	2.24	High	0.0007839	0.00909733
High	[R].TAADTTGLQPILNQFTPANISR.[Q]	[N19]	P06756 [597-618]	0.00793644	0.00021907	3.57143	0.752122	227.486	172.514	3.78857	High	0.000214	0.00570308
High	[R].TANHSAPSLENSVQPGK.[R]	[N3]	Q9UJ14 [521-537]	0.00902415	0.000504062	1	1.20956	180.575	219.425	2.64	High	0.00038125	0.00669747
High	[R].TASCSNVTCWLK.[D]	[N6]	P17301 [1052-1063]	0.000206998	0	1.66667	1.71135	57.7667	96.5667	2.87333	High	0	0.000106568
High	[R].TCVSNCTASQFVCK.[N]	[N5]	Q07954 [3329-3342]	0.00551372	0	1.5	1.52788	157.1	242.9	2.31	High	0	0.0035101
High	[R].TDCDSSTTSLCSFPVANVSLTK.[G]	[N17]	Q96G97 [72-93]	0.0538428	0.00208777	1	0.838926	171.95	142.125	1.9	High	0.00156995	0.0358759
High	[R].TEKEPLSDPVGTCYLSTDNFTR.[I]	[N19]	P08648 [164-185]	1.14678e-06	0	1.66667	1.38504	167.5	232.5	3.63333	High	0	2.83567e-06
High	[R].TETTMSPLTNTTTSQGTTR.[C]	[N10]	Q9HC84 [1765-1783]	0.0220146	0	1	1.63666	151.8	248.2	1.56	High	0	0.0142
High	[R].TEVTQVNTTNCGR.[L]	[N7]	O95754 [503-515]	0.0154464	0.000726919	1	0.74599	229.1	170.9	1.435	High	0.0005541	0.0057375
High	[R].TGEQFSFNTTAAQPQYFK.[Y]	[N8]	Q8NBJ9 [158-175]	0.00580291	0	1	0.875401	213.1	186.9	2.67667	High	0	0.00363562
High	[R].THNLTDLSPHLR.[Y]	[N3]	P32004 [977-988]	0.000301523	0	1.25	0.708466	200.275	140.725	3.1525	High	0	0.00041683
High	[R].TILVDNNTWNNTHISR.[V]	[N6] Or [10]	P46977 [539-554]	0.0139292	0.000415242	2.875	0.677048	237.675	162.325	3.0425	High	0.0003165	0.00545566
High	[R].TLNCSGGHVK.[L]	[N3]	Q9P0K1 [632-641]	0.0220959	0.00100866	1	0.860956	150.45	130.6	1.69	High	0.0007679	0.0120195
High	[R].TPEQGSNGTDGASQK.[T]	[N7]	Q12913 [98-112]	0.0107397	0.000294943	1	2.09351	129.3	270.7	1.94667	High	0.0002246	0.0022148
High	[R].TPHATCFNGEDFDRPVVVSNCSCTR.[E]	[N20]	Q92673 [655-679]	3.33252e-06	0	1	1.00806	169.68	169.26	4.884	High	0	3.10308e-06
High	[R].TQDEILFSNSTR.[L]	[N9]	Q6YHK3 [110-121]	0.0811217	0.00392584	1.5	1.47275	161.35	238.65	1.96	High	0.0029445	0.0670805
High	[R].TSIPTINMENK.[T]	[N10]	P26006 [960-970]	0.0204575	0.000518767	1.66667	1.16054	142.9	161.5	1.83667	High	0.000392667	0.0132283
High	[R].TTLVDNNTWNNSHIALVGK.[A]	[N]	Q8TCJ2 [618-636]	0.0218798	0.00102881	4.5	0.87858	190.25	167.21	2.304	High	0.00088127	0.0123972
High	[R].TVLENSTSYEEAK.[N]	[N5]	Q13510 [255-267]	0.0120982	0.000586142	1	1.63666	101	147.425	3.02	High	0.000441	0.00924322
High	[R].VCEIHEDNSTR.[S]	[N8]	Q29983 [118-128]	0.000597883	0	1	0.602047	142.775	83.9	2.5175	High	0	0.000296918
High	[R].VDEGEECDPGIMYLNNDTCCNSDCTLK.[E]	[N16]	P78536 [483-509]	0.00353458	0	2.5	1.26743	176.1	223.9	2.21	High	0	0.0019822
High	[R].VDNITDQFCNASVVDPACVR.[C]	[N3; N10]	O15118 [959-978]	1.21301e-05	0	1.25	0.683177	191.175	131.475	4.14	High	0	1.21973e-05
High	[R].VESGENCSSPAPR.[E]	[N6]	Q14643 [2507-2519]	0.00121493	0.00013291	1.5	2.6455	69.1	178.45	2.6125	High	0.00010245	0.000305319
High	[R].VFGSQNLTTVK.[L]	[N6]	Q9Y4L1 [510-520]	0.000723554	0	2.75	1.27186	126.775	166	2.8725	High	0.000104225	0.0017806
High	[R].VFPQVNVTK.[M]	[N6]	P54802 [256-264]	0.0566449	0.00234457	1	0.931099	207.2	192.8	1.53	High	0.001764	0.04372
High	[R].VGNDTHCQPTK.[I]	[N3]	B0FP48 [138-148]	0.0525038	0.00215416	1	2.61097	54.3	139.467	2.06333	High	0.00161147	0.0416283
High	[R].VGYQSQNISCFFR.[L]	[N7]	Q6NSJ0 [505-517]	0.00487908	0	1.5	0.713267	233.45	166.55	2.255	High	0	0.0045195
High	[R].VINQTTCENLLPQQITPR.[M]	[N3]	Q9Y5Y6 [770-787]	7.26463e-10	0	2.25	0.87127	213.45	186.55	4.6875	High	0	9.97939e-09
High	[R].VISAGGNDSR.[S]	[N7]	Q58EX2 [571-580]	0.0176622	0.000534413	1	1.53492	129.375	201.3	2.115	High	0.000407375	0.0100608
High	[R].VIYNLTEK.[G]	[N4]	Q969V3 [425-432]	0.00833792	0.000177214	1.33333	1.20773	176.2	223.8	2.09333	High	0.0001366	0.00290867
High	[R].VLEAVNGTDAR.[L]	[N6]	O60487 [34-44]	0.00184583	0.000177214	1	1.28977	174.567	225.433	2.16667	High	0.0001366	0.000686867
High	[R].VNASTTEPNSTVEQSALMR.[D]	[N2; N9]	P07942 [1335-1353]	2.86408e-05	0	2.16667	1.05263	193.267	206.733	3.19667	High	0	0.00015466
High	[R].VNITYNYPVR.[A]	[N2]	Q3MIR4 [285-294]	0.0246056	0.000592625	1.5	0.633714	216.4	136.55	2.4275	High	0.0007597	0.021449
High	[R].VNLSAAPAPVSAVPTGLHSK.[M]	[N2]	O95502 [215-234]	0.00725658	0.00025925	1	1.07354	192.075	207.925	3.13	High	0.000196325	0.00509057
High	[R].VNNTLSSQISR.[L]	[N2]	P11047 [1106-1116]	0.031189	0.00125592	1.5	1.71527	96.625	175.025	2.2975	High	0.0009365	0.024855
High	[R].VNSTELFHVDR.[H]	[N2]	Q7Z7M0 [420-430]	2.6635e-06	0	1	0.679348	99.3	67.5	4.1	High	0	8.199e-06
High	[R].VPDAANLSSAWR.[N]	[N6]	O76082 [52-63]	0.0369056	0.00129379	1	0.778362	224.75	175.25	1.5925	High	0.00096445	0.0215012
High	[R].VPPGDSPPGNGSGPR.[H]	[N10]	Q9BZR6 [363-377]	0.0512326	0.000884829	1	0.862813	214.7	185.3	0.85	High	0.0006738	0.01266
High	[R].VQGNSTLLHITDLQAR.[D]	[N4]	O75054 [98-113]	3.62353e-06	0	2.25	1.16144	180.9	219.1	3.0625	High	0	2.26007e-06
High	[R].VQPFNVTQGK.[Y]	[N5]	P13473 [352-361]	0.00825612	0.000345667	1.66667	0.90036	207.767	192.233	3.07667	High	0.000574333	0.0134454
High	[R].VQQVGHYPPANSSLSSR.[S]	[N11]	Q24JP5 [61-77]	0.00380434	0	1.5	0.66778	239.7	160.3	1.635	High	0	0.0024553
High	[R].VTGLNCTTNHPINPK.[G]	[N5]	P08648 [864-878]	0.093329	0.00401348	1	1.21773	154.94	181.26	1.746	High	0.00308206	0.057924
High	[R].VTPACNTSLPAQR.[W]	[N6]	Q9UBG0 [64-76]	0.0381884	0.00172458	1	2.14592	126.575	273.425	1.9175	High	0.00128792	0.028472
High	[R].VYGQNINNETWSR.[I]	[N]	Q9H8M5 [105-117]	0.0392193	0.00144264	1.66667	0.785546	223.967	176.033	1.99	High	0.001083	0.0311614
High	[R].WCPQNSSCVNATACR.[C]	[N5; N10]	P48960 [29-43]	0.00850554	0.00014638	1.71429	1.19169	167.571	204.629	2.55143	High	0.000846714	0.0167323
High	[R].WLCDGDNDCGNSEDESNATCSAR.[T]	[N17]	Q07954 [912-934]	0.000119761	0	1	1.1825	183.167	216.833	3.39	High	0	6.03783e-05
High	[R].WWHQQTNATQEVVR.[D]	[N7]	O00754 [127-140]	0.00658789	0.00025925	1.25	1.01937	171.875	175.4	2.4	High	0.000196325	0.00450647
High	[R].YAVYWNSSNPR.[F]	[N6]	P52803 [32-42]	0.031214	0.000796834	1	0.574218	164.75	90.7	2.05	High	0.0006013	0.022005
High	[R].YENGCAYFHEEER.[E]	[N3]	Q6P996 [131-143]	0.0206221	0.000721567	1	0.789733	223	177	2.3475	High	0.0005355	0.0155692
High	[R].YEQLQNETR.[Q]	[N6]	P11117 [162-170]	0.0671121	0.00214813	1.66667	1.34953	143.2	198.6	1.54333	High	0.0016114	0.05146
High	[R].YGENNSLSVEGFR.[K]	[N4]	Q13433 [64-76]	0.0518584	0.00202524	1.75	0.644434	242.65	157.35	1.8	High	0.0015167	0.0402326
High	[R].YHGFLNTSYHR.[Q]	[N6]	P11117 [87-97]	0.0246479	0.000442414	1	0.434783	278.55	121.45	2.88	High	0.0003369	0.00595665
High	[R].YHNQTLR.[Y]	[N3]	P11717 [398-404]	0.0428977	0.00132581	1	1.0395	161.125	164.15	2.215	High	0.00100622	0.0225825
High	[R].YHQCYNGSGMDYR.[G]	[N6]	Q01974 [313-325]	0.0101134	0.000106328	1	0.930925	206.22	193.78	2.238	High	8.196e-05	0.00612634
High	[R].YHSQTYGNGSK.[C]	[N8]	Q13438 [170-180]	0.0322618	0.00113689	1.25	1.54979	104.225	157.125	2.245	High	0.0008528	0.0241876
High	[R].YHYNGSLMDGTLFDSSYSR.[N]	[N4]	Q96AY3 [291-309]	0.000393361	0	1	0.944797	204.629	195.371	3.02714	High	0	0.000223028
High	[R].YHYNGTFEDGK.[K]	[N4]	Q96AY3 [67-77]	0.00512644	0.00013291	2.25	1.65289	121.35	200.975	2.58	High	0.00047695	0.012175
High	[R].YHYNGTFEDGKK.[F]	[N4]	Q96AY3 [67-78]	0.0248637	0.000963668	1	1.63399	80.5667	132.3	2.10333	High	0.000726967	0.0177427
High	[R].YHYNGTLLDGTSFDTSYSK.[G]	[N4]	Q96AY3 [179-197]	0.00120154	0	2.33333	0.933707	205.533	194.467	3.82333	High	0	0.000633379
High	[R].YKPDTLAVAVENGTGTDR.[Q]	[N12]	Q9H0X4 [378-395]	0.00145847	0	1.25	0.821187	218.775	181.225	2.84	High	0	0.000877527
High	[R].YNATVYSQAANGTEGQPQAIEFR.[T]	[N2; N11]	Q12913 [341-363]	6.1705e-06	0	1.25	0.722804	230.7	169.3	4.565	High	0	2.68264e-06
High	[R].YNCTATNHIGTR.[F]	[N2]	O15394 [473-484]	0.000391779	0	1.8	0.420239	280.22	119.78	2.896	High	0	0.000188431
High	[R].YNSTIQESLHR.[S]	[N2]	Q9BYE2 [291-301]	0.00650475	0.000182144	1	0.892857	169.2	150.833	2.8	High	0.000138967	0.00440479
High	[R].YVQNGTYTVK.[I]	[N4]	Q14126 [459-468]	0.00181594	0.00013291	2	1.38648	102.775	142.075	2.6075	High	0.0004837	0.00863575
High	[RK].NYTADYDK.[TA]	[N1]	O75477 [106-113]	0.0101222	0.000269519	1.75	2.17155	104.45	208.05	2.25	High	0.000206675	0.005913

## Sheet: R1R2R3-Combined
Glycopeptide	117/115-R1	117/115-R2	117/115-R3	AVERAGE	SD	115-R1	115-R2	115-R3	117-R1	117-R2	117-R3	P-value	log2（Fold）	-LOG10(P)
A2RU67 [392-405]	0.7768	0.702247	0.70406	0.727702	0.0425292	223.5	234.733	185	176.5	165.267	132.3	0.0286612	-0.45858	1.54271
B0FP48 [138-148]	2.07469	2.42131	2.61097	2.36899	0.27194	130	25.9	54.3	270	62.7	139.467	0.246705	1.24427	0.607823
O00391 [130-147]	0.747105	0.618047	0.674309	0.67982	0.0647053	228.25	247.2	238.9	171.75	152.8	161.1	0.00194026	-0.556775	2.71214
O00468 [130-140]	1.14943	0.925497	1.30605	1.12699	0.191266	140.033	207.7	173.267	163.967	192.3	226.733	0.364147	0.172476	0.438724
O00468 [246-261]	1.07325	0.948092	1.0846	1.03531	0.0757488	192.375	204.15	191.6	207.625	195.85	208.4	0.0819787	0.0500674	1.0863
O00469 [206-215]	1.01061	0.754717	0.976801	0.914043	0.139012	91.45	227.95	143	91.6	172.05	141.4	0.788238	-0.129666	0.103343
O00478 [113-123]	0.750188	0.895656	0.867052	0.837632	0.0770677	228.6	211	213.867	171.4	189	186.133	0.0554786	-0.255612	1.25587
O00584 [206-223]	1.00351	0.953971	0.877193	0.944892	0.0636472	199.375	204.2	212.5	200.625	195.8	187.5	0.732016	-0.0817786	0.135479
O00754 [127-140]	0.864678	0.878477	1.01937	0.920841	0.0856053	124.3	212.3	171.875	106.3	187.7	175.4	0.870879	-0.118976	0.0600421
O00754 [366-373]	1.37931	1.21655	1.36426	1.32004	0.0899424	168.1	180.5	169.1	231.9	219.5	230.9	0.000730521	0.400579	3.13637
O00754 [765-781]	1.34078	1.44718	1.43164	1.40653	0.0574696	170.55	163.267	120.025	229.45	236.733	179.85	0.0228582	0.492144	1.64096
O00754 [930-940]	0.772798	0.944287	0.842933	0.853339	0.086217	225.633	205.8	177.867	174.367	194.2	145.6	0.208256	-0.228809	0.681403
O14657 [59-69]	1.62206	1.34907	1.60901	1.52671	0.153981	152.5	144.775	54.9	247.5	192.775	87.95	0.296123	0.61043	0.528528
O14672 [277-291]	1.12486	1.52788	1.23711	1.29662	0.207997	114.25	103.35	178.5	137.75	162.975	221.5	0.293859	0.374754	0.531861
O14672 [439-446]	2.69724	1.67224	2.25352	2.20767	0.514034	107.875	149.6	122.1	292.125	250.4	277.9	0.000728786	1.14252	3.1374
O14672 [533-557]	1.16219	0.836587	1.1244	1.04106	0.178083	165.567	214.867	186.155	202.944	185.133	213.845	0.302893	0.0580515	0.518711
O14773 [429-447]	0.919681	0.918063	1.08519	0.97431	0.0960255	207.067	207.975	191.3	192.933	192.025	208.7	0.673608	-0.0375466	0.171593
O14786 [143-159]	0.912825	1.00705	1.14877	1.02288	0.118764	208.65	199.167	186	191.35	200.833	214	0.302849	0.0326367	0.518773
O14786 [144-159]	1.22699	1.29032	1.14416	1.22049	0.0732954	179.5	174.65	186.35	220.5	225.35	213.65	0.00604902	0.287465	2.21831
O14786 [517-527]	1.99402	1.86393	1.5536	1.80385	0.226273	133.6	139.65	84	266.4	260.35	131.8	0.0759243	0.851079	1.11962
O15031 [517-531]	0.875985	0.880475	0.998752	0.918404	0.0696191	211.657	194.938	189.6	188.343	171.562	191.05	0.476971	-0.122799	0.321508
O15118 [959-978]	0.648789	0.660066	0.683177	0.664011	0.01753	242.567	239.025	191.175	157.433	160.975	131.475	0.0074311	-0.590722	2.12895
O15230 [2003-2022]	0.995355	0.714796	0.928998	0.879716	0.146628	200.1	231.8	206.586	199.9	168.2	193.414	0.238486	-0.18489	0.622538
O15230 [2208-2220]	0.838574	0.962232	1.11669	0.9725	0.139344	216.35	203.725	188.375	183.65	196.275	211.625	0.849532	-0.0402292	0.0708204
O15230 [2422-2434]	1.02643	1.07296	0.952381	1.01726	0.0608113	155.925	176.775	204.075	158.325	190.475	195.925	0.713484	0.0246851	0.146615
O15230 [3106-3123]	0.607995	0.547046	0.674764	0.609935	0.063881	248.525	257.333	237.5	151.475	142.667	162.5	0.000355232	-0.713273	3.44949
O15230 [458-482]	0.729572	1.50678	0.767263	1.00121	0.438246	230.633	153.867	224.567	169.367	246.133	175.433	0.991986	0.00173784	0.00349446
O15230 [84-99]	1.1354	1.0101	1.1744	1.10663	0.0858424	186.85	198.85	152.2	213.15	201.15	181.175	0.0755018	0.146175	1.12204
O15342 [70-77]	2.21239	1.3089	1.54719	1.68949	0.468253	123.75	171.233	156.767	276.25	228.767	243.233	0.00520094	0.75659	2.28392
O15394 [473-484]	0.379903	0.395961	0.420239	0.398701	0.0203069	289.825	286.475	280.22	110.175	113.525	119.78	2.7073e-05	-1.32662	4.56746
O43291 [88-103]	1.06101	0.826105	0.914495	0.933869	0.118644	166.45	160.1	97.575	173.175	130.15	90.7	0.88994	-0.0987076	0.0506392
O43396 [133-151]	1.07991	1.03806	1.03896	1.05231	0.0239076	192.3	196.267	196.25	207.7	203.733	203.75	0.0529247	0.0735629	1.27634
O43556 [196-207]	1.002	0.720461	0.957549	0.893338	0.151357	199.8	232.5	204.267	200.2	167.5	195.733	0.28836	-0.162722	0.540065
O43852 [131-150]	1.20846	1.52207	1.40878	1.37977	0.158805	179.4	158.5	165.617	220.6	241.5	234.383	0.00298288	0.464428	2.52536
O60487 [113-126]	1.41693	1.00604	1.31839	1.24712	0.21452	164.2	199.133	159.3	235.8	200.867	212.45	0.0177441	0.3186	1.75095
O60487 [34-44]	0.632778	0.895656	1.28977	0.939401	0.330672	205.8	168.175	174.567	126.733	150.1	225.433	0.830127	-0.0901876	0.0808553
O60568 [542-551]	0.88476	1.00654	0.973473	0.954925	0.0629743	164.15	123.5	151.35	145.05	121.55	151.2	0.917396	-0.0665405	0.037443
O60637 [125-136]	1.93424	1.96947	1.99402	1.96591	0.0300499	136.3	134.65	133.5	263.7	265.35	266.5	1.4828e-05	0.975197	4.82892
O60637 [167-176]	0.834725	0.988142	1.11826	0.980374	0.141925	218	201.2	157.425	182	198.8	179.025	0.881524	-0.0285957	0.0547661
O60911 [213-232]	0.737101	0.711491	0.771605	0.740065	0.0301666	229.6	233.4	225.75	170.4	166.6	174.25	0.00114835	-0.434275	2.93993
O75054 [652-660]	1.06045	1.15252	1.06952	1.09416	0.0507412	194.2	106	193.3	205.8	115.3	206.7	0.725063	0.129824	0.139624
O75054 [819-832]	1.47113	1.02067	1.27551	1.25577	0.225878	161.775	196.375	136.65	238.225	203.625	172.125	0.0894823	0.328571	1.04826
O75054 [833-843]	1.10865	1.24339	1.35685	1.2363	0.124254	189.6	177.825	169.8	210.4	222.175	230.2	0.00708569	0.306027	2.14962
O75054 [98-113]	0.921234	1.08932	1.16144	1.05733	0.123257	202.575	190.1	180.9	197.425	209.9	219.1	0.0679306	0.0804299	1.16793
O75071 [292-305]	0.738552	0.690894	0.670017	0.699821	0.0351291	230	235.98	239.55	170	164.02	160.45	0.00209676	-0.514942	2.67845
O75072 [92-102]	0.821524	0.965251	0.904977	0.897251	0.0721744	176.55	176.575	209.4	146.375	171.925	190.6	0.634513	-0.156417	0.19756
O75144 [100-110]	1.14482	1.04575	0.926784	1.03912	0.109169	186.5	195.525	176.475	213.5	204.475	158.625	0.4354	0.0553601	0.361111
O75144 [61-79]	0.60778	0.744602	0.896459	0.749613	0.144405	248.367	228.55	210.475	151.633	171.45	189.525	0.031911	-0.415781	1.49606
O75197 [132-142]	0.898473	1.00739	1.14548	1.01711	0.123788	210.7	199.233	186.4	189.3	200.767	213.6	0.391052	0.0244783	0.407766
O75462 [286-297]	1.24018	0.968054	1.57916	1.26246	0.306159	174.6	202.1	154.825	225.4	197.9	245.175	0.0422645	0.336242	1.37402
O75477 [106-113]	2.25479	1.66251	2.17155	2.02962	0.320637	81.15	98.275	104.45	191.35	176.375	208.05	0.00201294	1.02121	2.69617
O75503 [201-215]	0.541712	0.473934	0.63012	0.548588	0.0783198	259.5	271.4	245.4	140.5	128.6	154.6	0.000302891	-0.866204	3.51871
O75718 [87-107]	0.795123	0.981354	0.988142	0.92154	0.109533	177.633	201.65	201.2	134.767	198.35	198.8	0.743634	-0.117881	0.128641
O75882 [1071-1079]	1.53374	1.42113	1.50602	1.48696	0.0586769	157.9	164.867	39.9	242.1	235.133	60.1	0.408042	0.57237	0.389295
O75882 [297-305]	1.0453	1.32319	1.3624	1.24363	0.172875	195.233	171.65	168.975	204.767	228.35	231.025	0.0193574	0.314555	1.71315
O75882 [411-422]	0.891464	0.811688	0.908595	0.870583	0.0517182	142.125	218.42	153.5	116.2	181.58	144.16	0.572611	-0.199947	0.242141
O75882 [731-743]	0.768344	0.82282	0.784929	0.792031	0.0279234	225.4	219.167	223.4	174.6	180.833	176.6	0.00910345	-0.336371	2.04079
O75882 [906-927]	0.759494	0.850629	0.792079	0.800734	0.0461802	227.233	215.24	173.1	172.767	184.76	142.2	0.126003	-0.320605	0.89962
O75976 [1062-1077]	1.36351	1.06838	0.992392	1.14143	0.196048	166.36	156.775	197.133	233.64	168.75	202.867	0.243434	0.190838	0.613619
O75976 [626-635]	1.3089	1.27065	1.46843	1.34933	0.104905	173.25	176.2	109.65	226.75	223.8	167.1	0.0712661	0.432239	1.14712
O76024 [733-756]	0.839983	0.847458	0.773395	0.820279	0.0407739	214.8	215.533	225.3	185.2	184.467	174.7	0.0371633	-0.285814	1.42989
O76082 [52-63]	0.730727	0.71908	0.778362	0.742723	0.0314088	230.9	232.567	224.75	169.1	167.433	175.25	0.00123325	-0.429104	2.90895
O94901 [726-738]	0.963855	1.00629	0.841928	0.937358	0.0853244	164.875	198.9	216.625	157.125	201.1	183.375	0.80176	-0.0933286	0.0959556
O95084 [205-218]	1.47565	1.16043	1.29199	1.30936	0.158327	160.833	184.95	113.125	239.167	215.05	147.3	0.148257	0.388858	0.828984
O95084 [83-96]	0.95816	0.780031	0.840866	0.859686	0.0905436	202.567	224.7	217.175	197.433	175.3	182.825	0.100666	-0.218118	0.997117
O95196 [349-360]	0.648088	0.57554	0.686577	0.636735	0.0563828	241.6	253.65	237.05	158.4	146.35	162.95	0.000399138	-0.651235	3.39888
O95274 [123-148]	0.733878	0.705787	0.771084	0.736916	0.0327543	230.325	231.943	225.188	169.675	168.057	174.812	0.00126665	-0.440427	2.89734
O95274 [149-170]	1.23571	1.19142	1.14548	1.19087	0.0451209	140.55	181.9	165.85	171.35	218.1	189.025	0.117428	0.252016	0.93023
O95297 [45-55]	0.983768	1.0238	1.09091	1.03283	0.0541376	201.25	197.55	191.2	198.75	202.45	208.8	0.101127	0.0465983	0.995131
O95502 [215-234]	0.925069	1.05932	1.07354	1.01931	0.0819233	207.467	194.1	192.075	192.533	205.9	207.925	0.263609	0.0275923	0.579039
O95502 [35-57]	0.731886	0.738144	0.750892	0.740307	0.00968587	230.033	230.125	227.125	169.967	169.875	172.875	0.00150501	-0.433804	2.82246
O95754 [503-515]	0.776398	0.582751	0.74599	0.701713	0.10414	224.533	252.7	229.1	175.467	147.3	170.9	0.00566163	-0.511047	2.24706
O95857 [133-146]	1.02512	0.876424	1.05485	0.985464	0.0955946	197.175	209.3	133.425	202.825	190.7	139.85	0.842719	-0.021125	0.0743173
O95858 [189-201]	1.25831	1.28601	1.21951	1.25461	0.0334023	173.543	173.49	164.522	226.457	226.51	198.944	0.00157777	0.327241	2.80196
O96005 [290-304]	0.856531	0.855615	0.700158	0.804101	0.090019	208.4	208.225	234.65	191.6	191.775	165.35	0.171713	-0.314551	0.765197
P00533 [594-609]	0.790097	0.820345	0.737572	0.782671	0.041883	223.267	219.7	229.06	176.733	180.3	170.94	0.0120779	-0.353522	1.91801
P01011 [268-283]	1.41393	1.64474	1.49254	1.51707	0.117344	164.5	151.3	160.3	235.5	248.7	239.7	0.000501736	0.601285	3.29953
P01033 [46-60]	0.754859	0.816827	0.865801	0.812496	0.0555974	227.575	184.025	182.65	172.425	146.825	160.9	0.116665	-0.299568	0.933059
P01861 [173-181]	1.49254	1.04058	1.51745	1.35019	0.268417	160.5	196	158.933	239.5	204	241.067	0.015984	0.433163	1.79632
P01892 [107-121]	1.21396	1.08755	1.46628	1.25593	0.19282	180.425	155.7	60.925	219.575	169.125	93.525	0.513897	0.328754	0.289124
P02751 [535-550]	1.5241	0.962001	0.875197	1.12043	0.35227	135.5	203.95	213	211.388	196.05	187	0.48985	0.164056	0.309937
P02786 [721-732]	0.637697	0.634786	0.702521	0.658335	0.0382942	238.729	199.733	181.867	161.271	126.033	129.344	0.0250584	-0.603107	1.60105
P04062 [302-316]	0.639591	0.700771	0.674082	0.671481	0.0306729	242.95	234	238.825	157.05	166	161.175	0.00137051	-0.574581	2.86312
P04066 [382-391]	1.06553	1.48699	1.5625	1.37167	0.267802	193.45	160.7	156.033	206.55	239.3	243.967	0.0191286	0.455937	1.71832
P04626 [518-536]	0.924214	0.779575	0.769379	0.824389	0.0866012	207.8	224.4	225.8	192.2	175.6	174.2	0.0441312	-0.278602	1.35525
P04626 [616-640]	1.55521	1.22324	1.34529	1.37458	0.167911	39.75	179.7	168.8	61.35	220.3	231.2	0.546252	0.458992	0.262607
P05026 [153-170]	1.60171	1.51286	1.57778	1.56412	0.0459743	149.367	159.2	126.04	250.633	240.8	215.56	0.000492541	0.645349	3.30756
P05026 [193-203]	0.970246	1.01833	0.640615	0.876397	0.205604	145.167	198.2	94.8	150.867	201.8	60.7	0.966332	-0.190344	0.0148737
P05362 [178-187]	1.50943	1.35318	1.34048	1.40103	0.0940931	158.65	169.7	86.725	241.35	230.3	112.95	0.238126	0.48649	0.623193
P05362 [259-273]	1.69014	1.97922	1.30919	1.65952	0.336064	148.1	134	171.7	251.9	266	228.3	0.00417351	0.730762	2.3795
P05556 [205-220]	1.50739	1.67457	1.74622	1.64273	0.122559	92.98	148.067	126.883	147.68	251.933	223.883	0.0638617	0.716092	1.19476
P05556 [34-63]	0.870047	0.852192	1.02641	0.916215	0.0958453	211.873	214.022	195.609	188.127	185.978	204.391	0.496623	-0.126242	0.303973
P05556 [403-413]	1.34078	1.23085	1.41764	1.32976	0.0938778	143.05	148.8	87.7	209.683	189	120.57	0.155111	0.411163	0.809358
P05556 [403-414]	1.79166	1.9025	1.96188	1.88535	0.0864001	72.1286	75.0875	69.6714	131.757	149.65	139.829	0.000250208	0.914829	3.6017
P05556 [477-490]	0.794597	0.91617	1.11266	0.941141	0.160493	219.325	208.575	188.625	180.675	191.425	211.375	0.837005	-0.0875169	0.0772718
P05556 [518-539]	1.39233	1.12587	1.40805	1.30875	0.158573	164.789	183.34	161.93	235.211	216.66	238.07	0.00193723	0.388191	2.71282
P05556 [519-539]	1.35685	1.15207	1.38291	1.29728	0.126425	165.978	184	167.6	234.022	216	232.4	0.00167831	0.37549	2.77513
P06213 [697-714]	2.41838	1.26502	1.33156	1.67165	0.647539	116.9	176.6	171.5	283.1	223.4	228.5	0.02154	0.741276	1.66676
P06731 [208-214]	0.798085	0.825309	1.69779	1.10706	0.511769	222.4	199.2	61.2667	177.6	164.6	102.167	0.9281	0.146736	0.032405
P06731 [645-664]	0.527816	0.832408	0.609703	0.656642	0.157628	259.2	216.033	248.3	140.8	183.967	151.7	0.025069	-0.60682	1.60086
P06756 [597-618]	1.21976	1.2012	0.752122	1.05769	0.264796	193.44	172.85	227.486	238.8	227.15	172.514	0.495813	0.0809229	0.304682
P06756 [73-88]	1.55945	1.91847	2.0284	1.83544	0.245249	151.825	137.05	100.725	248.175	262.95	200.95	0.0050774	0.876125	2.29436
P06756 [865-883]	1.87793	1.79856	2.53968	2.07206	0.406914	114.225	97.875	63.675	210.525	156.6	152.925	0.0156158	1.05107	1.80644
P07204 [107-121]	1.4245	1.67364	1.24896	1.44903	0.213401	164.575	146.35	177.4	235.425	253.65	222.6	0.00614427	0.535091	2.21153
P07339 [257-266]	1.16144	0.659522	0.778513	0.866492	0.26227	185.1	210.55	160.45	214.9	136.25	122.75	0.513939	-0.206742	0.289088
P07711 [217-230]	0.923361	0.817884	0.784929	0.842058	0.0723126	207.533	219.533	222.425	192.467	180.467	177.575	0.0573158	-0.248008	1.24173
P07942 [1271-1283]	4.0201	3.35852	3.36134	3.57999	0.38115	69.525	78.55	68.125	274.475	264.25	224.125	0.000118178	1.83996	3.92746
P07942 [1335-1353]	1.52625	1.28995	1.05263	1.28961	0.23681	153.67	174.2	193.267	246.33	225.8	206.733	0.0289983	0.366937	1.53763
P07949 [554-563]	0.772002	0.835596	0.924642	0.84408	0.0766726	200.567	148.975	207.35	154.167	124.175	192.65	0.510631	-0.244548	0.291893
P07996 [1065-1077]	0.536769	0.453001	0.515929	0.5019	0.0436105	259.85	274.625	263.075	140.15	125.375	136.925	0.000108445	-0.994529	3.96479
P07996 [351-371]	1.23457	0.8	0.904977	0.979848	0.226752	179	221.9	209.933	221	178.1	190.067	0.994041	-0.0293695	0.00259587
P08069 [223-252]	0.674006	0.494438	0.521921	0.563455	0.0967212	238.7	265.75	262.35	161.3	134.25	137.65	0.00184951	-0.827628	2.73294
P08069 [741-753]	0.528262	0.441891	0.438212	0.469455	0.0509615	257.1	277.133	277.9	142.9	122.867	122.1	0.000517608	-1.09094	3.286
P08174 [84-96]	0.848716	0.79639	0.809225	0.81811	0.0272714	216.325	220.933	188.05	183.675	179.067	150.725	0.0347261	-0.289633	1.45934
P08195 [417-429]	0.469043	0.551694	0.594682	0.538473	0.0638542	216.82	234.72	168.829	118.72	139.26	110.286	0.00841947	-0.893054	2.07472
P08648 [164-185]	1.287	1.41309	1.38504	1.36171	0.0662048	174.9	165.3	167.5	225.1	234.7	232.5	0.000791603	0.445422	3.10149
P08648 [709-727]	0.772499	0.700525	0.750188	0.741071	0.0368428	225.5	235.05	183.067	174.5	164.95	132.067	0.0288497	-0.432317	1.53986
P08648 [771-783]	1.35823	1.32319	1.36101	1.34748	0.0210796	139.1	172.15	168.875	190.275	227.85	231.125	0.0315376	0.43026	1.50117
P08648 [864-878]	0.992556	1.2837	1.21773	1.16466	0.152653	200.15	42.3	154.94	199.85	54.3	181.26	0.811893	0.21991	0.0905011
P08962 [129-138]	1.03426	1.05778	1.16771	1.08658	0.0712365	170.362	170.962	117.375	176.5	179.388	137.438	0.373411	0.119801	0.427812
P08962 [145-156]	1.31406	1.13218	1.34635	1.2642	0.115462	125.375	187.55	107.725	164.475	212.45	149.35	0.197687	0.338221	0.704021
P09758 [160-177]	0.903342	0.810866	0.832813	0.849007	0.0483185	209.775	187.95	218	190.225	151.175	182	0.272548	-0.236152	0.564558
P10253 [138-154]	1.08035	1.12275	1.5537	1.25227	0.261907	173.337	185.917	140.275	196.138	214.083	224.7	0.0198113	0.324544	1.70309
P10253 [386-393]	1.74672	1.59236	1.49701	1.61203	0.126016	91.15	107.15	65.2	147.55	159.95	97.6	0.0652015	0.688878	1.18574
P10253 [465-479]	1.14188	1.45985	1.20012	1.26728	0.169294	185.825	90.8	175.175	214.175	134.7	224.825	0.349658	0.34174	0.456356
P10586 [957-972]	0.926069	0.994036	1.0596	0.993236	0.0667705	204.7	200.217	193.425	195.3	199.783	206.575	0.277687	-0.00979189	0.556445
P10619 [327-347]	1.06812	1.10375	1.12982	1.10056	0.0309701	189.778	188.267	186.56	210.222	211.733	213.44	0.00682263	0.138243	2.16605
P10909 [372-385]	0.951249	1.31105	0.978713	1.08034	0.200272	204.6	173.025	201.425	195.4	226.975	198.575	0.286012	0.11148	0.543616
P10909 [81-89]	1.28866	1.40302	1.61725	1.43631	0.166806	126.367	115.325	84.1	174.667	164.4	135.1	0.0186731	0.522366	1.72878
P10909 [82-89]	1.38504	1.7316	1.64024	1.58563	0.179619	167.25	106.4	151.533	232.75	187	248.467	0.0373087	0.665054	1.42819
P11047 [1012-1023]	1.27986	1.0923	1.43885	1.27034	0.173471	134.833	163.075	127.14	152.333	175.375	177.64	0.0552985	0.345212	1.25729
P11047 [1106-1116]	1.13766	1.396	1.71527	1.41631	0.28934	143.433	124.333	96.625	163.3	175.367	175.025	0.0110613	0.502134	1.95619
P11047 [1203-1217]	1.20846	1.39567	1.386	1.33004	0.105407	176.9	166.8	115.033	223.1	233.2	151.15	0.119324	0.411475	0.923272
P11117 [130-150]	0.823316	0.94162	0.913242	0.892726	0.0617624	218	204.5	190.343	182	195.5	177.129	0.178309	-0.163711	0.748826
P11117 [162-170]	1.87441	1.39909	1.34953	1.54101	0.289797	86.85	119.1	143.2	157.3	163.325	198.6	0.0637579	0.623877	1.19547
P11117 [171-181]	1.68445	1.08382	1.23813	1.33547	0.311921	148.533	191.833	178.233	251.467	208.167	221.767	0.0251812	0.417343	1.59892
P11117 [87-97]	0.567376	0.554939	0.434783	0.519032	0.073227	214.825	257.2	278.55	120.35	142.8	121.45	0.00940098	-0.946103	2.02683
P11166 [39-51]	0.569638	0.825083	0.703235	0.699319	0.127767	253.925	219.1	233.975	146.075	180.9	166.025	0.0191047	-0.515978	1.71886
P11279 [247-254]	2.46305	1.51229	1.6129	1.86275	0.522309	31.7	102.125	60.975	78.1	144.375	97.95	0.17198	0.897433	0.764522
P11279 [62-77]	0.944622	0.879701	0.994755	0.939692	0.0576852	203.925	210.762	189.127	196.075	189.238	189.218	0.35819	-0.0897394	0.445887
P11279 [83-96]	1.01044	1.02617	1.09739	1.04467	0.0463344	197.267	177.125	95.2	202.733	178.25	107.725	0.748839	0.0630437	0.125611
P11279 [97-106]	0.782014	0.79984	0.838574	0.806809	0.0289173	184.525	193.4	188.475	149.275	155.875	157.875	0.0155407	-0.3097	1.80853
P11717 [107-125]	0.844119	0.873362	0.744971	0.820818	0.0672925	215.133	213.167	161.2	184.867	186.833	127.6	0.356572	-0.284866	0.447853
P11717 [1311-1321]	1.44648	1.22279	1.30378	1.32435	0.113254	82.2	105.82	81.4333	122.8	132.1	102.117	0.0282156	0.405286	1.54951
P11717 [1656-1669]	0.788333	0.883132	1.0395	0.903655	0.126836	222.85	211.967	196.2	177.15	188.033	203.8	0.33242	-0.146156	0.478313
P11717 [2123-2146]	1.0644	0.783699	1.00376	0.95062	0.147702	192.45	224.3	198.525	207.55	175.7	201.475	0.866792	-0.0730598	0.062085
P11717 [398-404]	1.0744	1.14943	1.0395	1.08778	0.0561692	118.325	161.775	161.125	130.15	184.825	164.15	0.471288	0.121382	0.326714
P11717 [427-436]	1.30208	1.23153	1.25078	1.26146	0.0364709	173.8	179.2	177.275	226.2	220.8	222.725	0.000793168	0.335099	3.10063
P11717 [734-753]	1.43184	1.52439	1.49989	1.48538	0.0479505	160.54	156.72	158.071	239.46	243.28	241.929	0.000119266	0.570828	3.92348
P13473 [248-266]	0.553894	0.721696	0.747624	0.674404	0.105167	214.34	230.063	176.829	124.68	169.937	137.257	0.0298572	-0.568314	1.52495
P13473 [352-361]	1.11142	1.02354	0.90036	1.01177	0.106021	155.1	97.9	207.767	168.7	99.9	192.233	0.928683	0.0168868	0.0321323
P13674 [105-118]	0.624545	0.619771	0.645057	0.629791	0.0134348	212.8	246.825	226.8	130.9	153.175	146.475	0.00301054	-0.667055	2.52136
P13726 [155-163]	1.73611	1.59236	1.85357	1.72735	0.130826	146.2	154.3	140.2	253.8	245.7	259.8	8.40846e-05	0.788557	4.07528
P13987 [40-55]	1.01885	0.869817	1.0923	0.993655	0.11336	198.075	213.133	166.4	201.925	186.867	180.775	0.608452	-0.0091829	0.215774
P14625 [215-237]	0.51164	0.652559	0.838223	0.667474	0.163802	261.217	241.1	203.078	138.783	158.9	173.044	0.0151824	-0.583217	1.81866
P14625 [435-448]	0.888099	0.856409	0.834725	0.859744	0.0268433	211.8	215.467	187.8	188.2	184.533	159.733	0.0558198	-0.218021	1.25321
P14625 [494-503]	0.897263	0.881834	1.04275	0.940617	0.0887882	134.625	179.025	71.7	122.375	157.25	74.8	0.9087	-0.088321	0.0415794
P15529 [83-96]	0.637349	0.704101	0.679964	0.673805	0.0337999	240.533	232.425	237.9	159.467	167.575	162.1	0.0016312	-0.569598	2.78749
P15586 [275-290]	0.695604	0.788022	0.784665	0.756097	0.0524156	230.08	214.65	222.243	169.92	185.35	177.757	0.0216246	-0.403357	1.66505
P16070 [55-68]	0.995768	0.895155	1.07198	0.987633	0.0886905	199.65	210.525	192.229	200.35	189.475	207.771	0.459558	-0.0179533	0.33766
P16422 [109-125]	0.540394	0.579151	0.679925	0.599823	0.0720259	259.7	252.267	237.6	140.3	147.733	162.4	0.000652745	-0.73739	3.18526
P16422 [71-77]	2.27273	0.839631	2.6738	1.92872	0.96426	122.3	100.3	43.2	277.7	84.3	115.6	0.29679	0.947642	0.52755
P17301 [1052-1063]	1.75208	1.55642	1.71135	1.67328	0.103236	100	101.75	57.7667	168.85	160.15	96.5667	0.0730651	0.742683	1.13629
P17301 [95-110]	0.924214	0.693481	0.695088	0.770928	0.132752	207.9	236.2	233.533	192.1	163.8	166.467	0.0358435	-0.375332	1.44559
P18084 [476-497]	0.893855	0.900901	0.969697	0.921484	0.0419018	210.45	210.1	201.975	189.55	189.9	198.025	0.317438	-0.117969	0.498342
P18084 [576-595]	1.36612	0.984979	1.13921	1.16344	0.191722	167.825	201.5	186.64	232.175	198.5	213.36	0.0533591	0.218393	1.27279
P18564 [459-466]	3.11526	3.98804	2.39617	3.16649	0.79717	65.65	71.775	61.3667	201.6	277	152.833	0.0135177	1.66288	1.8691
P18564 [567-594]	4.0282	3.29489	2.3166	3.21323	0.858715	75	91.45	120.2	325	308.55	279.8	0.000301061	1.68402	3.52135
P20645 [80-95]	0.987654	1.01895	1.13993	1.04884	0.0804164	200.55	166.04	184.7	199.45	173.86	215.3	0.353361	0.0688005	0.451781
P21333 [2185-2201]	1.19474	1.07009	1.61812	1.29432	0.287265	177.35	193	152.8	222.65	207	247.2	0.0203559	0.372193	1.69131
P21860 [248-258]	0.665557	0.720461	0.734889	0.706969	0.0365819	197.25	193.7	207.2	134.95	139.375	152.85	0.0146665	-0.500281	1.83367
P21860 [603-622]	1.03093	1.01885	1.20919	1.08632	0.106578	197	197.5	124.5	203	202.5	156.3	0.40951	0.119452	0.387735
P22223 [563-570]	2.12879	1.63934	1.81488	1.86101	0.247962	127.775	125.4	120.3	272.225	204.375	213.525	0.00487848	0.896083	2.31172
P22303 [495-501]	1.78891	1.56986	1.34228	1.56702	0.223327	42.4	154.967	170.7	75.8	245.033	229.3	0.39291	0.64802	0.405707
P23229 [322-332]	1.08992	1.05042	1.04822	1.06285	0.0234658	154.7	194.975	69.7	170.8	205.025	73	0.763132	0.0879409	0.117401
P23229 [762-783]	1.1655	0.989609	1.03977	1.06496	0.0906111	183.8	201	195.525	216.2	199	204.475	0.0758602	0.0907999	1.11999
P23229 [925-938]	0.762583	0.769034	0.744417	0.758678	0.0127645	161.667	225.767	229.2	124.633	174.233	170.8	0.228693	-0.398441	0.640747
P23470 [433-447]	0.483247	0.434405	0.537057	0.484903	0.0513461	268.233	277.25	260.2	131.767	122.75	139.8	5.75378e-05	-1.04423	4.24005
P25106 [185-197]	0.582524	0.618047	0.707047	0.635873	0.0641466	252.367	247	234	147.633	152	166	0.000690113	-0.65319	3.16108
P25445 [106-121]	1.05708	0.61792	0.843882	0.839628	0.219612	194.5	247.233	216.875	205.5	152.767	183.125	0.201948	-0.252178	0.694759
P26006 [265-274]	1.05152	0.714286	1.24018	1.002	0.266423	194.767	233.3	139.6	205.233	166.7	175.5	0.94913	0.00287882	0.0226743
P26006 [77-87]	0.989854	1.06157	1.01937	1.0236	0.0360452	200.25	193.5	197.15	199.75	206.5	202.85	0.142301	0.0336488	0.846792
P26006 [960-970]	1.03842	1.19665	1.16054	1.13187	0.0829187	195.95	181.3	142.9	204.05	218.7	161.5	0.215362	0.178709	0.666832
P27701 [190-199]	1.04275	2.1097	0.962464	1.37164	0.640442	195.8	128.7	161.967	204.2	271.3	161.133	0.203769	0.455902	0.690862
P28799 [518-535]	1.09111	1.57978	1.04712	1.23934	0.295652	190.975	154.725	170.25	209.025	245.275	177.55	0.105846	0.309567	0.975324
P29323 [258-270]	1.14767	1.02093	1.19	1.11953	0.0879784	147.133	197.7	144.067	159.133	202.3	168.7	0.332439	0.162897	0.478287
P30101 [83-94]	2.14362	1.33156	2.19298	1.88939	0.483725	126.825	42.2	92.94	273.175	56.2	206.86	0.238336	0.917919	0.622809
P30825 [216-230]	0.75959	1.85787	0.76864	1.1287	0.631498	226.75	139.875	204.12	173.25	260.125	157.86	0.772977	0.174663	0.111834
P32004 [486-494]	2.00401	0.668003	2.21729	1.62977	0.839713	132.6	239.8	85.2	267.4	160.2	186.375	0.301909	0.704667	0.520124
P32004 [668-678]	2.78164	2.2818	1.78359	2.28234	0.499025	105.25	66.85	137.867	294.75	155.125	262.133	0.0460577	1.19052	1.3367
P32004 [977-988]	0.583601	2.0377	0.708466	1.10992	0.805899	222.325	92.875	200.275	128.9	179.375	140.725	0.711958	0.150458	0.147545
P35052 [61-80]	0.594001	0.231535	0.713946	0.51316	0.25116	250.95	324.8	233.067	149.05	75.2	166.933	0.0230389	-0.962518	1.63754
P35475 [369-383]	0.855725	0.607042	0.866051	0.776272	0.146649	215.5	248.633	113.2	184.5	151.367	97.7667	0.403513	-0.365365	0.394142
P35613 [153-170]	0.738552	0.878992	0.880282	0.832609	0.0814577	230.1	212.867	212.55	169.9	187.133	187.45	0.0492181	-0.264289	1.30788
P35613 [265-273]	1.0238	0.702247	1.02512	0.917055	0.18603	127.8	233.9	151.217	132.75	166.1	152.15	0.677587	-0.124919	0.169035
P36941 [172-184]	0.553403	0.595238	0.691802	0.613481	0.07098	257.5	250.7	235.75	142.5	149.3	164.25	0.000731343	-0.704909	3.13588
P40199 [207-225]	0.734754	0.81367	0.736377	0.7616	0.0451008	230.6	220.5	225.2	169.4	179.5	174.8	0.00754841	-0.392894	2.12214
P42785 [47-56]	0.974659	0.728067	0.966884	0.88987	0.140179	151.967	231.35	203.075	140.833	168.65	196.925	0.546125	-0.168333	0.262708
P42892 [162-176]	0.780945	1.17925	0.899281	0.953157	0.204543	224.35	182.65	209.467	175.65	217.35	190.533	0.859254	-0.0692143	0.0658783
P42892 [641-662]	0.660939	0.764916	0.725163	0.717006	0.0524664	240.667	226.5	231.54	159.333	173.5	168.46	0.00392651	-0.479943	2.40599
P43007 [197-211]	0.973552	1.12885	1.31648	1.13963	0.171719	201.183	166.414	170.7	198.817	192.257	229.3	0.124316	0.188563	0.905475
P43251 [340-360]	1.02987	0.984898	1.10457	1.03978	0.0604461	196.2	201.5	189.633	203.8	198.5	210.367	0.0625286	0.0562736	1.20392
P43308 [83-99]	0.950344	0.8	0.825423	0.858589	0.0804727	131.2	152.775	134.75	118.85	118.45	110.5	0.0240895	-0.21996	1.61817
P46531 [1489-1498]	0.983284	1.058	1.18859	1.07662	0.103912	201.7	193	182.7	198.3	206	217.3	0.0701796	0.106515	1.15379
P46977 [539-554]	0.726066	1.06326	0.677048	0.822126	0.210265	231.357	193.45	237.675	168.643	206.55	162.325	0.204949	-0.282569	0.688354
P48723 [184-196]	1.08167	0.548847	1.08131	0.903943	0.307522	190.65	258.3	165.72	209.35	141.7	182.48	0.563395	-0.145697	0.249187
P48960 [105-125]	1.72117	0.971345	2.11954	1.60402	0.582994	146.45	202.25	127.7	253.55	197.75	272.3	0.0401424	0.681691	1.3964
P48960 [29-43]	0.973552	1.60043	1.19169	1.25522	0.31823	202.367	152.667	167.571	197.633	247.333	204.629	0.0834776	0.327944	1.07843
P48960 [368-380]	1.12994	1.07383	1.36949	1.19109	0.157028	109.9	173.15	128.1	126.6	189.463	179.34	0.263278	0.252277	0.579586
P50897 [197-209]	0.912076	0.862218	0.978665	0.917653	0.0584237	208.96	214.66	178.84	191.04	185.34	178.96	0.232076	-0.12398	0.63437
P51168 [126-138]	0.496771	0.611247	0.606061	0.57136	0.0646476	267.3	79.1	248.1	132.7	48.3	151.9	0.297488	-0.807529	0.526531
P51689 [115-134]	0.469778	0.515597	0.515597	0.500324	0.0264537	271.067	262.95	263.8	128.933	137.05	136.2	0.000132479	-0.999066	3.87785
P52798 [28-38]	0.614628	0.568289	0.688863	0.623927	0.0608224	247.7	254.9	236.467	152.3	145.1	163.533	0.000351653	-0.680551	3.45389
P52803 [32-42]	0.562351	0.68306	0.574218	0.606543	0.0665311	255.55	237.35	164.75	144.45	162.65	90.7	0.0609076	-0.721319	1.21533
P53634 [51-62]	1.11029	1.01523	1.10173	1.07575	0.0525858	188.133	196.625	145.7	211.867	203.375	158.067	0.300203	0.10534	0.522585
P53801 [54-64]	0.933416	0.842815	1.25063	1.00895	0.214141	206.767	216.65	141.82	193.233	183.35	178.24	0.807773	0.0128578	0.0927106
P54802 [256-264]	1.11982	0.992556	0.931099	1.01449	0.0962544	188.6	200.75	207.2	211.4	199.25	192.8	0.41832	0.0207572	0.378491
P54802 [500-510]	1.30321	1.40944	1.43885	1.38384	0.0713511	173.533	117.1	163.933	226.467	165.7	236.067	0.10473	0.468673	0.979929
P55072 [714-732]	1.51515	0.801925	0.91659	1.07789	0.382996	159	222	206.35	241	178	193.65	0.583461	0.108208	0.233988
P55268 [1249-1266]	0.844951	0.614817	0.733407	0.731058	0.115085	216.55	247.5	230.45	183.45	152.5	169.55	0.012105	-0.451941	1.91704
P55268 [1347-1365]	0.575788	0.532836	0.592944	0.567189	0.0309628	253.45	259.575	249.825	146.55	140.425	150.175	0.00010488	-0.818098	3.97931
P56159 [405-422]	0.626959	0.712251	0.681385	0.673532	0.0431846	65.1	233.1	216.9	40.8	166.9	151.66	0.527692	-0.570183	0.27762
P56159 [57-69]	0.818331	0.652742	0.733003	0.734692	0.0828075	219.475	242	229.7	180.525	158	170.3	0.00608837	-0.444789	2.2155
P61647 [64-73]	1.07875	0.854457	1.04877	0.993991	0.121766	192.3	215.467	64.2	207.7	184.533	66.85	0.961662	-0.00869493	0.0169777
P78536 [264-273]	0.983284	0.925926	1.23153	1.04691	0.162433	201.7	207.7	179.1	198.3	192.3	220.9	0.252248	0.0661407	0.598172
P78536 [483-509]	1.43678	1.37174	1.26743	1.35865	0.0854329	164.2	168.6	176.1	235.8	231.4	223.9	0.00107786	0.442174	2.96744
P78536 [534-543]	1.39665	1.09141	1.18413	1.22406	0.15649	129.833	152.7	140.15	197.567	167.75	173.475	0.0123949	0.291677	1.90676
P78536 [585-601]	2.149	1.6632	1.68919	1.8338	0.273281	112.867	149.7	147.986	242.9	250.3	252.014	0.00119374	0.874833	2.92309
P98160 [1750-1758]	0.947643	0.861698	0.954198	0.92118	0.0516171	172.475	185.8	176.675	165.125	159.3	166.45	0.252616	-0.118446	0.59754
Q01974 [313-325]	1.0057	0.903506	0.930925	0.94671	0.0528936	199.1	209.86	206.22	200.9	190.14	193.78	0.735373	-0.0790056	0.133493
Q02083 [36-47]	0.79713	0.727273	0.706839	0.743747	0.0473466	221.5	231.6	193.8	178.5	168.4	140.7	0.0132183	-0.427116	1.87882
Q02487 [391-397]	1.30548	1.49701	1.46199	1.42149	0.101981	173.5	160.2	162.5	226.5	239.8	237.5	0.000892955	0.507406	3.04917
Q02487 [627-634]	0.565718	0.520698	0.679002	0.588472	0.0815683	181.667	211.65	195.05	101.133	107.55	144.3	0.014807	-0.764953	1.82953
Q02742 [45-61]	0.90525	0.734484	0.823271	0.821002	0.0854058	207.133	230.5	219.1	192.867	169.5	180.9	0.0426236	-0.284543	1.37035
Q02809 [194-203]	0.860092	0.523697	0.824402	0.736064	0.184778	106.633	164.25	174.067	89.6333	100.25	141.933	0.319379	-0.442097	0.495694
Q02809 [534-541]	1.50376	0.911577	1.39925	1.27153	0.316078	83.9333	93.7	97.7333	130.3	92	138.867	0.120478	0.346566	0.919092
Q03405 [221-238]	1.54261	1.45773	1.50943	1.50326	0.04278	156.825	162.567	127.05	243.175	237.433	193.35	0.00512016	0.588093	2.29072
Q04771 [102-110]	0.82713	0.768935	0.894055	0.83004	0.0626105	218.9	226.15	210.95	181.1	173.85	189.05	0.0128267	-0.268748	1.89188
Q04900 [138-157]	0.74239	0.721631	0.712251	0.725424	0.0154238	229.267	231.975	232.875	170.733	168.025	167.125	0.00175654	-0.463104	2.75534
Q06481 [540-549]	1.0142	1.10406	1.14449	1.08758	0.0666907	158.325	190	186.125	159.9	210	213.875	0.357312	0.121125	0.446952
Q07954 [110-117]	2.34192	1.8797	2.34742	2.18968	0.268465	82	138.9	119.5	180.5	261.1	280.5	0.0226577	1.13072	1.64479
Q07954 [1507-1517]	1.09569	1.12644	1.15141	1.12451	0.0279101	190.2	128.075	153.65	209.8	145.25	170.825	0.408599	0.169302	0.388703
Q07954 [2904-2916]	1.35135	1.55461	1.1325	1.34615	0.211099	170.2	156.55	179.75	229.8	243.45	220.25	0.00527084	0.428843	2.27812
Q07954 [3329-3342]	1.50376	1.14188	1.52788	1.39117	0.216233	159.8	186.675	157.1	240.2	213.325	242.9	0.00470259	0.476303	2.32766
Q07954 [3782-3797]	1.27024	1.49925	1.26542	1.34497	0.13363	175.825	156.125	173.35	224.175	243.875	226.65	0.00385595	0.427577	2.41387
Q07954 [3831-3842]	1.7762	1.56311	2.04221	1.79384	0.240034	144.1	137.15	101.467	255.9	214.175	204.267	0.00361073	0.84305	2.44241
Q07954 [4074-4086]	1.11566	1.45278	1.33869	1.30238	0.171472	88.1667	160.5	169.75	92.4	239.5	230.25	0.391079	0.381146	0.407735
Q07954 [4357-4369]	1.82482	2.25734	3.0722	2.38478	0.63338	140	122.9	97.9	260	277.1	302.1	0.000888184	1.25386	3.0515
Q07954 [445-455]	0.736377	1.23001	1.31926	1.09522	0.313952	228.45	117.275	138.767	171.55	133.725	190.167	0.799026	0.131217	0.097439
Q07954 [723-733]	1.42248	1.25576	1.32626	1.33483	0.0836895	165.2	176.967	172	234.8	223.033	228	0.00063043	0.416656	3.20036
Q07954 [912-934]	1.16144	1.21017	1.1825	1.1847	0.0244372	184.933	179.667	183.167	215.067	220.333	216.833	0.00363767	0.244524	2.43918
Q08174 [304-327]	1.09489	0.868056	0.970167	0.977704	0.113605	190.9	214.1	202.325	209.1	185.9	197.675	0.801075	-0.0325296	0.0963268
Q08380 [118-128]	1.58856	1.82149	2.32378	1.91128	0.375742	154.25	141.35	94.1667	245.75	258.65	211.333	0.00381473	0.934538	2.41854
Q08380 [188-206]	0.74813	0.950872	1.01317	0.904058	0.138584	228.067	201.667	194.657	171.933	198.333	205.343	0.618868	-0.145514	0.208402
Q08380 [396-407]	3.31126	2.39234	2.23881	2.64747	0.579961	92.8	32.425	54.7333	307.2	77.425	129.033	0.182096	1.40461	0.739701
Q08380 [542-554]	2.8715	2.89575	2.56082	2.77602	0.186767	103.25	102.633	111.8	296.75	297.367	288.2	5.87039e-06	1.47302	5.23133
Q08380 [64-76]	0.945403	1.08342	0.893256	0.974028	0.0982622	163.975	185.8	175.55	157.35	214.2	157.925	0.710088	-0.0379656	0.148688
Q08722 [103-121]	0.819001	0.857817	0.97561	0.884142	0.0815559	183.5	184.425	146.075	156.15	156.6	151.775	0.29532	-0.177649	0.529707
Q08722 [64-74]	0.940291	1.58856	1.24844	1.2591	0.324267	169.025	153.8	101.9	160.3	246.2	128.35	0.325854	0.33239	0.486977
Q09328 [445-454]	0.639693	0.667	0.6876	0.664764	0.0240318	206.375	239.775	132.2	130.15	160.225	89	0.148223	-0.589085	0.829083
Q09328 [446-454]	0.76746	0.940734	0.852878	0.853691	0.0866399	226.3	128.8	215.9	173.7	119.7	184.1	0.555064	-0.228215	0.255657
Q11201 [109-118]	1.78253	1.10132	1.53531	1.47305	0.344846	32.8	156.333	91.3333	58.5	174.267	143.533	0.489747	0.558811	0.310029
Q12770 [587-600]	1.13938	1.3587	1.1534	1.21716	0.122773	154.333	168.825	181.175	174.133	231.175	218.825	0.103354	0.28352	0.985673
Q12913 [141-150]	1.92123	1.67926	1.96754	1.85601	0.154809	86.1	148.675	113.15	157.75	251.325	224.475	0.0387566	0.892204	1.41165
Q12913 [223-237]	0.782779	0.839772	0.895599	0.839383	0.056411	223.55	214.8	152.5	176.45	185.2	127.986	0.334615	-0.252599	0.475455
Q12913 [341-363]	0.664746	0.513018	0.722804	0.633523	0.108323	239.9	263.375	230.7	160.1	136.625	169.3	0.00256807	-0.658531	2.59039
Q12913 [388-400]	1.74902	0.803213	1.40154	1.31792	0.478414	143.85	221.8	156.625	256.15	178.2	243.375	0.135667	0.398267	0.867524
Q12913 [401-418]	1.1564	0.790202	0.893815	0.946807	0.188765	184.575	222.75	210.08	215.425	177.25	189.92	0.807036	-0.0788583	0.0931072
Q12913 [98-112]	1.97628	1.25392	2.09351	1.77457	0.454692	134.3	173.1	129.3	265.7	226.9	270.7	0.00339357	0.82747	2.46934
Q13308 [165-181]	1.62602	1.63399	0.812348	1.35745	0.47209	152.4	151.5	220.7	247.6	248.5	179.3	0.184593	0.440899	0.733786
Q13308 [563-581]	0.946223	0.989679	0.933925	0.956609	0.0292922	204.483	200.557	187.788	195.517	199.443	178.387	0.86933	-0.0639988	0.0608151
Q13332 [727-738]	1.0917	0.827815	0.916031	0.945183	0.134338	191.3	218.867	208.733	208.7	181.133	191.267	0.690996	-0.0813348	0.160524
Q13332 [930-949]	0.759494	0.612557	0.823215	0.731755	0.108033	226.9	245.95	219.125	173.1	154.05	180.875	0.00641419	-0.450567	2.19286
Q13433 [239-248]	0.846561	0.777303	0.99108	0.871648	0.109074	143.75	220.75	133.275	114.175	179.25	127.4	0.572388	-0.198183	0.24231
Q13433 [256-269]	0.93985	0.779545	0.917551	0.878982	0.0868339	184.64	224.22	208.171	173.68	175.78	191.829	0.284608	-0.186095	0.545752
Q13433 [64-76]	0.757576	0.721631	0.644434	0.70788	0.0578108	226.933	231.675	242.65	173.067	168.325	157.35	0.00603327	-0.498423	2.21945
Q13438 [170-180]	1.40647	1.38074	1.54979	1.44567	0.0910853	105.9	161.775	104.225	155.15	224.675	157.125	0.0901608	0.531733	1.04498
Q13444 [231-238]	1.13218	0.844595	0.974421	0.983733	0.14402	187.375	216.85	180.2	212.625	183.15	177.25	0.759815	-0.0236616	0.119292
Q13510 [255-267]	1.7094	1.64069	1.63666	1.66225	0.0408836	87.9	149.7	101	140.367	250.3	147.425	0.137815	0.733138	0.860702
Q13641 [114-129]	0.428954	0.48528	0.540833	0.485022	0.0559397	277.075	263.7	258.733	122.925	136.3	141.267	0.000214684	-1.04388	3.6682
Q13641 [81-94]	0.741565	0.560695	0.704225	0.668828	0.095489	228.6	248.35	234.4	171.4	151.65	165.6	0.00179849	-0.580292	2.74509
Q13740 [154-172]	0.873744	0.958313	0.807754	0.879937	0.0754703	213.1	202.15	221.233	186.9	197.85	178.767	0.233309	-0.184527	0.632068
Q14108 [245-262]	0.690846	0.894775	0.87382	0.819814	0.112179	236.55	175.58	175.26	163.45	157.82	150.6	0.172323	-0.286632	0.763658
Q14108 [98-115]	1.17199	0.972999	1.36379	1.16959	0.195407	184.025	200.5	168.65	215.975	199.5	231.35	0.0333453	0.226007	1.47697
Q14118 [641-652]	0.680504	0.59356	0.584795	0.61962	0.0529089	237.95	218	250.65	162.05	130.7	149.35	0.0112973	-0.690545	1.94702
Q14126 [107-119]	1.23801	1.11297	0.933489	1.09482	0.153068	177.575	188.85	206.8	222.425	211.15	193.2	0.167794	0.130694	0.775223
Q14126 [181-195]	1.26877	1.34048	1.65153	1.42026	0.203469	143.45	159.2	114.25	199.4	217.817	181.175	0.0064201	0.506154	2.19246
Q14126 [459-468]	1.81736	1.34725	1.38648	1.51703	0.260827	85.9	120	102.775	145.875	167.925	142.075	0.0103711	0.60125	1.98418
Q14573 [2402-2429]	0.712251	0.898473	0.976562	0.862429	0.135792	231.5	210.7	201.667	168.5	189.3	198.333	0.188101	-0.213523	0.725608
Q14643 [2507-2519]	3.84615	2.31839	2.6455	2.93668	0.804427	82.5	117.967	69.1	317.5	282.033	178.45	0.0130882	1.55419	1.88312
Q14703 [138-151]	1.19261	0.95511	1.04239	1.06337	0.12013	182.45	204.275	195.6	217.55	195.725	204.4	0.120088	0.088642	0.9205
Q15043 [76-86]	0.660175	0.780793	0.641746	0.694238	0.0755229	205.225	103.675	187.675	135.95	79.925	119.75	0.252794	-0.526498	0.597234
Q15165 [250-259]	1.10681	1.33298	1.19454	1.21144	0.114029	164.512	125.36	148.286	189.562	168.66	181.857	0.050682	0.276725	1.29515
Q15223 [200-210]	0.724638	0.849137	0.57323	0.715668	0.138172	165.067	164.7	254.25	130.333	139.033	145.75	0.226033	-0.482637	0.645828
Q15904 [248-266]	0.786164	0.846203	0.858922	0.830429	0.0388593	223.475	183.825	214.625	176.525	153.725	185.375	0.209285	-0.268071	0.679262
Q16563 [56-72]	1.3947	1.141	1.332	1.28923	0.132147	162.7	185	168.85	237.3	214	231.15	0.00288171	0.366514	2.54035
Q24JP5 [61-77]	0.643294	1.14123	0.66778	0.817433	0.28068	242.925	185.85	239.7	157.075	214.15	160.3	0.252189	-0.290827	0.598274
Q29983 [118-128]	0.618812	0.738916	0.602047	0.653258	0.074654	210.575	227.933	142.775	132.25	172.067	83.9	0.15066	-0.614274	0.822003
Q29983 [214-226]	0.677354	0.478469	0.616428	0.59075	0.101899	238.3	217.125	212.5	161.7	111.025	130.1	0.00729046	-0.75938	2.13724
Q3MIR4 [142-152]	0.605327	0.522375	0.824063	0.650588	0.155853	207.35	262.433	218.35	127.575	137.567	181.65	0.0361559	-0.620183	1.44182
Q3MIR4 [285-294]	0.554324	0.629327	0.633714	0.605788	0.0446233	257.4	245.5	216.4	142.6	154.5	136.55	0.000513461	-0.723115	3.28949
Q3T906 [455-476]	0.832813	0.826446	0.810898	0.823386	0.0112732	216.275	219	219.06	183.725	181	180.94	0.0141292	-0.280359	1.84988
Q4G148 [236-252]	0.821243	0.625978	0.799361	0.74886	0.10698	219.433	245.6	222.233	180.567	154.4	177.767	0.0104101	-0.417231	1.98254
Q4G148 [387-396]	0.902935	0.741381	0.742115	0.795477	0.0930617	210.15	229.55	171.1	189.85	170.45	124.6	0.175175	-0.330108	0.756527
Q4KMQ2 [360-368]	1.62866	0.726744	1.44578	1.26706	0.476781	152.2	231.433	86.1667	247.8	168.567	120	0.59288	0.341489	0.227033
Q4KMQ2 [794-807]	0.823723	1.12867	1.04987	1.00075	0.158294	218.867	187.85	195	181.133	212.15	205	0.689429	0.0010865	0.161511
Q58EX2 [571-580]	1.57604	0.95648	1.53492	1.35581	0.346444	154.45	204.45	129.375	245.55	195.55	201.3	0.0581343	0.43916	1.23557
Q5JPE7 [367-381]	1.26342	1.06383	1.20724	1.17817	0.102925	176.3	193.8	180.9	223.7	206.2	219.1	0.00716442	0.236542	2.14482
Q5JPE7 [612-621]	1.47275	0.930233	1.4498	1.28426	0.306814	160.067	206.65	115.2	239.933	193.35	182.625	0.120184	0.36094	0.920154
Q5JRA6 [248-260]	2.13675	1.07836	1.85759	1.6909	0.548531	127.4	192.4	121.95	272.6	207.6	234.45	0.0192069	0.757791	1.71654
Q5JRA6 [572-592]	1.14174	2.00401	0.925754	1.35717	0.570495	185.886	133.2	153.66	214.114	266.8	135.26	0.255044	0.440598	0.593386
Q5JTV8 [397-404]	0.621311	0.895576	0.898473	0.80512	0.15919	246.6	210.46	95.8	153.4	189.54	86.1	0.546129	-0.312725	0.262705
Q5VW38 [153-173]	1.1274	1.02433	1.25	1.13391	0.112977	186.825	197.425	177.25	213.175	202.575	222.75	0.0158464	0.181303	1.80007
Q5ZPR3 [74-92]	0.617951	0.729262	0.717746	0.68832	0.0612121	245.8	206.125	232.35	154.2	150.375	167.65	0.0195292	-0.538849	1.70931
Q68CQ7 [255-264]	0.910125	1.7094	0.909504	1.17634	0.461642	209.25	147.7	209.475	190.75	252.3	190.525	0.409239	0.23431	0.388023
Q68CR1 [525-536]	1.8315	1.21951	1.44092	1.49731	0.309867	141.3	180.2	122.033	258.7	219.8	176.767	0.0360803	0.582375	1.44273
Q6EMK4 [112-121]	0.65136	0.621118	0.573806	0.615428	0.0390888	200.525	246.8	232.9	129.025	153.2	135.75	0.00801114	-0.700338	2.09631
Q6NSJ0 [239-254]	0.772499	0.728332	0.678887	0.726573	0.046831	225.45	201.475	237.95	174.55	146.45	162.05	0.0428254	-0.460821	1.3683
Q6NSJ0 [505-517]	0.616523	0.737463	0.713267	0.689084	0.063994	247.25	229.95	233.45	152.75	170.05	166.55	0.00332053	-0.537248	2.47879
Q6P4A8 [63-75]	1.62338	0.678887	1.39916	1.23381	0.493479	151.9	238.2	139.171	248.1	161.8	193.286	0.410374	0.303118	0.38682
Q6P4E1 [112-127]	0.844238	1.43232	1.0851	1.12055	0.295641	214.125	163.733	191.429	185.875	236.267	208.571	0.284422	0.164213	0.546037
Q6P4E1 [149-156]	1.15607	0.824742	1.49031	1.15704	0.332786	143.333	218.8	89.1	161.933	181.2	126.8	0.723319	0.210441	0.14067
Q6P4E1 [150-156]	1.5674	1.11276	1.36986	1.35001	0.227969	155.8	71.9667	168.8	244.2	77.1333	231.2	0.423635	0.432967	0.373008
Q6P996 [131-143]	0.832639	1.02881	0.789733	0.883727	0.127461	218.2	120.3	223	181.8	122.7	177	0.632359	-0.178328	0.199037
Q6PCB8 [210-221]	1.23191	0.833333	1.2945	1.11991	0.25015	179.2	218.2	115	220.8	181.8	154.25	0.497177	0.163386	0.303489
Q6UXD5 [244-258]	0.892957	0.762195	1.00692	0.887358	0.12246	209.55	227	185.1	190.45	173	185.363	0.127426	-0.172412	0.894741
Q6UXD5 [361-377]	1.17925	0.888776	1.35135	1.13979	0.233798	182.75	210.257	140.825	217.25	189.743	186.075	0.178743	0.188769	0.747772
Q6UXG2 [389-410]	1.06496	1.18378	1.21507	1.1546	0.0791918	192.55	183.05	179.15	207.45	216.95	220.85	0.00943641	0.207398	2.02519
Q6UXG2 [711-722]	1.56705	1.30753	1.43343	1.436	0.129777	124.514	172.58	99.9125	190.743	227.42	151.65	0.0762397	0.52206	1.11782
Q6UXH1 [190-204]	2.42718	1.11129	1.19617	1.57821	0.736453	81.3667	154.829	180.9	204.467	168.329	219.1	0.150449	0.658294	0.822612
Q6UXH1 [249-275]	3.09598	3.11769	2.65756	2.95707	0.259619	96.15	79.775	107.914	303.85	262.45	292.086	0.00029885	1.56417	3.52455
Q6YHK3 [110-121]	1.78784	5.72082	1.47275	2.99381	2.36691	143.433	58.5	161.35	256.567	341.5	238.65	0.0232161	1.58198	1.63421
Q6YHK3 [418-429]	0.928505	1.79211	1.22549	1.31537	0.438764	207.4	39.1	179.7	192.6	70.2	220.3	0.758174	0.395469	0.120231
Q6ZMP0 [364-384]	0.696541	1.35501	0.711575	0.921043	0.375905	234.1	169.85	233.233	165.9	230.15	166.767	0.606965	-0.11866	0.216836
Q6ZQN7 [541-550]	1.39276	0.61212	1.22699	1.07729	0.411287	167.2	248.133	179.7	232.8	151.867	220.3	0.742185	0.107407	0.129488
Q6ZRP7 [170-190]	0.708341	1.52905	0.66346	0.966951	0.487311	232.45	158.2	238.225	167.55	241.8	161.775	0.75472	-0.0484855	0.122214
Q7LGA3 [102-111]	0.887049	0.577617	0.960846	0.808504	0.20333	164.333	253.45	172.6	146.033	146.55	164.85	0.222056	-0.306673	0.653538
Q7Z2K6 [809-826]	0.991408	0.80429	0.744417	0.846705	0.128843	198.733	137.533	227.6	201.267	104.9	172.4	0.611702	-0.240069	0.21346
Q7Z388 [115-124]	1.02041	1.08873	1.00376	1.03763	0.045027	61.7	190.05	132.9	63.15	209.95	135.275	0.819063	0.0532985	0.0866825
Q7Z5N4 [1332-1344]	0.911369	0.854336	0.801282	0.855662	0.0550556	176.65	137.35	148.9	162.2	120.45	113.35	0.40551	-0.224886	0.391999
Q7Z6Z7 [2372-2400]	0.775795	0.923361	0.850521	0.849892	0.0737849	222.967	207.467	215.5	177.033	192.533	184.5	0.0839573	-0.234648	1.07594
Q7Z7H5 [100-120]	0.50163	0.449236	0.533049	0.494639	0.0423416	266	276	260.8	134	124	139.2	5.73729e-05	-1.01555	4.24129
Q7Z7M0 [1105-1116]	0.912409	0.525417	0.891266	0.776364	0.217583	209.2	260.8	69.2	190.8	139.2	61.7	0.555537	-0.365195	0.255287
Q7Z7M0 [1194-1206]	0.689814	0.661813	0.764916	0.705514	0.0533143	178.167	240.7	226.633	126.3	159.3	173.367	0.0958999	-0.503253	1.01818
Q7Z7M0 [420-430]	0.837287	0.670691	0.679348	0.729109	0.0937853	176.433	239.45	99.3	151.233	160.55	67.5	0.450755	-0.455794	0.346059
Q86WC4 [132-144]	0.920175	1.24069	1.66528	1.27538	0.373761	110.875	178.5	128.15	107.15	221.5	213.225	0.316136	0.35093	0.500126
Q8IV08 [386-396]	1.28329	1.15875	1.5748	1.33895	0.213539	116.425	185.2	72.05	143.525	214.8	111.975	0.404613	0.421097	0.39296
Q8IWA5 [181-198]	0.624331	1.18064	0.693481	0.832817	0.3032	244.743	183.45	235.471	155.257	216.55	164.529	0.295587	-0.263929	0.529315
Q8IWA5 [199-209]	1.64745	0.876616	1.23724	1.25377	0.385681	149.25	212.175	178	250.75	187.825	222	0.120291	0.32627	0.919768
Q8IWA5 [407-420]	1.2487	1.31926	1.00806	1.19201	0.16316	153.067	172.5	173.725	194.183	227.5	176.9	0.0761284	0.253394	1.11845
Q8IWB1 [26-39]	1.54162	1.06724	1.49421	1.36769	0.261279	156.967	171.375	160.35	243.033	183.925	239.65	0.0325541	0.451741	1.48739
Q8IWU5 [238-258]	2.07361	1.7316	1.81159	1.87227	0.178897	129.775	55.55	125.85	270.225	96.1	225.433	0.168878	0.904788	0.772427
Q8N0Z9 [347-360]	0.836353	0.219106	0.97561	0.677023	0.402634	217.7	327.967	164.325	182.3	72.0333	163.875	0.178675	-0.562723	0.747936
Q8N271 [539-551]	0.797766	1.03306	1.02145	0.950758	0.132622	221.85	196.8	137.85	178.15	203.2	142.6	0.908633	-0.0728496	0.0416114
Q8N697 [138-151]	0.94697	0.727008	0.92081	0.864929	0.120157	205.05	231.45	175.733	194.95	168.55	163.5	0.190918	-0.209346	0.719154
Q8N766 [909-918]	0.819001	0.939408	0.596837	0.785082	0.173786	116.3	163.75	175	122.55	155.825	94.45	0.43286	-0.349085	0.363653
Q8NBJ4 [104-115]	1.15207	0.664011	1.44648	1.08752	0.395209	185.45	153.567	162.8	214.55	95.1	237.2	0.66427	0.121044	0.177655
Q8NBJ9 [158-175]	0.914077	1.46843	0.875401	1.08597	0.331784	209	162	213.1	191	238	186.9	0.54214	0.118983	0.265888
Q8NBK3 [139-151]	1.49701	0.829187	1.60836	1.31152	0.421406	160.2	218.7	112.1	239.8	181.3	180.975	0.224856	0.391239	0.648096
Q8NBN3 [62-68]	0.703235	1.02197	1.28866	1.00462	0.293098	234.8	109.8	129.433	165.2	106.125	169.2	0.912875	0.00665329	0.0395888
Q8NFQ8 [284-302]	0.568505	0.677966	0.624298	0.62359	0.0547341	254.4	238.4	245.68	145.6	161.6	154.32	0.00135409	-0.681331	2.86835
Q8NHP8 [465-477]	1.25984	0.592066	1.08763	0.979847	0.346691	175.275	249.125	155.514	224.725	150.875	163.2	0.866987	-0.0293716	0.0619875
Q8NHP8 [509-524]	0.736703	1.19213	0.803213	0.910682	0.246001	229.76	180.617	187.5	170.24	219.383	150.325	0.645132	-0.13498	0.190351
Q8TBP5 [78-99]	1.09131	0.685683	0.975419	0.917469	0.208929	189.067	235.58	145.02	210.933	164.42	140.94	0.738177	-0.124268	0.131839
Q8TCJ2 [618-636]	1.12511	1.0442	0.87858	1.01597	0.125669	159.14	145.167	190.25	177.78	149.533	167.21	0.800383	0.0228518	0.0967019
Q8TCJ2 [637-647]	1.4202	1.0218	1.71527	1.38576	0.348015	120.837	197.567	106.7	168.362	202.433	188.575	0.119418	0.470673	0.922931
Q8TCT8 [147-159]	0.912131	1.53817	0.682527	1.04427	0.442861	208.833	145.062	236.057	191.167	222.488	163.943	0.967971	0.0625014	0.0141375
Q8TEM1 [1438-1447]	0.779423	0.684463	0.840807	0.768231	0.0787709	224.8	237.4	103.967	175.2	162.6	85.0333	0.437705	-0.380388	0.358819
Q8WVQ1 [79-98]	0.687285	0.642674	0.660066	0.663342	0.0224855	236.44	243.5	240.72	163.56	156.5	159.28	0.000592064	-0.592176	3.22763
Q8WWI5 [176-186]	1.47167	1.13122	1.38632	1.32974	0.177137	65.8	187.35	136.833	97.3	212.65	184.8	0.448463	0.411142	0.348273
Q92508 [2291-2302]	1.20337	1.50905	1.10619	1.27287	0.210231	181.6	90.6	189.85	218.4	130.233	210.15	0.452087	0.348088	0.344778
Q92508 [2324-2335]	0.794123	1.07354	0.813421	0.893694	0.156047	219.05	192.75	160.675	180.95	207.25	136.062	0.724896	-0.162147	0.139724
Q92542 [415-429]	0.886918	1.44509	0.749766	1.02726	0.368292	210.825	163.6	228.5	189.175	236.4	171.5	0.893988	0.0387969	0.0486683
Q92545 [287-296]	0.860092	0.705965	0.918274	0.82811	0.109708	142.8	234.375	162.833	124.667	165.625	148.233	0.381049	-0.272105	0.419019
Q92626 [1273-1283]	1.56087	0.917431	1.34892	1.27574	0.327904	155.7	208.6	169.667	244.3	191.4	230.333	0.0687758	0.351337	1.16256
Q92626 [1362-1376]	0.897666	1.32057	0.848356	1.0222	0.259571	210.65	144.55	216.075	189.35	194.9	183.925	0.859644	0.0316729	0.0656812
Q92673 [1160-1172]	1.32714	0.864553	1.53022	1.24064	0.341161	171.65	214	108.725	228.35	186	163.05	0.312931	0.311083	0.504551
Q92673 [1244-1254]	1.87266	1.20846	1.78678	1.62263	0.361245	66.25	150.85	44.8333	121.075	185.925	80.1667	0.330128	0.698336	0.481318
Q92673 [1602-1609]	2.32829	1.67574	2.16606	2.0567	0.339742	71.65	95.475	42.7667	172.05	153.4	94.2333	0.0457047	1.04033	1.34004
Q92673 [1703-1711]	1.7331	1.88679	1.72117	1.78036	0.0923704	51	51.475	146.9	88.4	97.325	253.1	0.371379	0.832165	0.430183
Q92673 [1852-1866]	0.868432	1.72612	0.937866	1.17747	0.47641	213.025	112.7	206.125	186.975	190	193.875	0.620962	0.235695	0.206935
Q92673 [1887-1895]	1.25945	1.06581	1.27836	1.20121	0.117635	57.9667	192.775	77.95	72.7667	207.225	99.975	0.705339	0.264486	0.151602
Q92673 [655-679]	0.861326	1.09529	1.00806	0.988227	0.118237	213.94	190.9	169.68	186.06	209.1	169.26	0.788091	-0.0170855	0.103424
Q92673 [867-879]	1.07759	0.918105	1.25104	1.08224	0.166518	192.6	205.76	177.633	207.4	194.24	222.367	0.0922342	0.114027	1.03511
Q92791 [354-367]	0.886525	1.11514	1.05597	1.01921	0.118656	212	187.875	194.55	188	212.125	205.45	0.417751	0.0274509	0.379083
Q92791 [71-95]	0.893655	0.873108	0.894055	0.886939	0.0119797	211.2	213.533	210.3	188.8	186.467	189.7	0.06292	-0.173093	1.20121
Q92823 [222-231]	0.774443	0.737463	0.773545	0.761817	0.0210959	185.35	230.1	115.2	144.625	169.9	88	0.38819	-0.392483	0.410956
Q92823 [265-280]	1.10132	0.808843	0.786782	0.898982	0.175578	190.3	221.1	223.9	209.7	178.9	176.1	0.381178	-0.153635	0.418872
Q92854 [191-198]	0.689774	0.814775	0.551167	0.685238	0.131862	236.3	220.3	257.733	163.7	179.7	142.267	0.0256607	-0.545322	1.59073
Q92859 [67-83]	0.776699	0.779423	0.67981	0.745311	0.0567419	225.1	224.8	238.1	174.9	175.2	161.9	0.0101996	-0.424086	1.99142
Q92896 [209-222]	1.9685	2.43902	1.9305	2.11268	0.283263	134.8	116.2	136.5	265.2	283.8	263.5	0.000194868	1.07907	3.71026
Q92896 [786-793]	2.97619	2.38854	2.185	2.51657	0.410844	100	66.9667	64.0667	300	143.833	139.4	0.0818511	1.33146	1.08698
Q95604 [107-121]	1.45138	1.00908	1.16381	1.20809	0.224449	163.2	198.975	183.95	236.8	201.025	216.05	0.0393738	0.272726	1.40479
Q969V3 [425-432]	2.1645	1.25261	1.20773	1.54161	0.539904	126.5	174.833	176.2	273.5	225.167	223.8	0.0182999	0.624441	1.73755
Q96AQ6 [440-458]	1.40056	0.97371	1.13593	1.17007	0.215463	164.833	201.7	187.067	235.167	198.3	212.933	0.061615	0.226592	1.21031
Q96AY3 [179-197]	0.98668	0.844595	0.933707	0.92166	0.0718045	201.35	216.75	205.533	198.65	183.25	194.467	0.346093	-0.117693	0.460807
Q96AY3 [291-309]	0.81728	0.850196	0.944797	0.870757	0.0661986	218.714	215.62	204.629	181.286	184.38	195.371	0.0729356	-0.199657	1.13706
Q96AY3 [67-77]	1.80505	1.47547	1.65289	1.64447	0.164953	142.45	114.3	121.35	257.55	168.775	200.975	0.0287482	0.717625	1.54139
Q96AY3 [67-78]	1.33779	1.27119	1.63399	1.41432	0.193128	100.2	102.5	80.5667	150.9	114.267	132.3	0.0191543	0.500111	1.71773
Q96F46 [54-66]	0.792812	0.706547	0.743633	0.747664	0.0432733	222.433	234.2	228.425	177.567	165.8	171.575	0.00288479	-0.419538	2.53989
Q96FM1 [31-50]	1.78253	1.51469	1.44196	1.57973	0.179358	115.05	132.62	157.75	203.5	197.46	242.25	0.0212197	0.659676	1.67326
Q96G97 [72-93]	0.858615	0.814553	0.838926	0.837365	0.0220722	215.133	217.1	171.95	184.867	182.9	142.125	0.192322	-0.256072	0.715972
Q96GX1 [362-377]	1.01078	0.87203	0.88164	0.921484	0.0774834	197.033	213.35	212.25	202.967	186.65	187.75	0.469256	-0.117969	0.32859
Q96HD1 [205-220]	0.587199	0.741977	0.68306	0.670746	0.0781205	250.775	229.475	236.2	149.225	170.525	163.8	0.00423242	-0.576163	2.37341
Q96HE7 [277-287]	0.783085	0.681896	0.841928	0.76897	0.0809446	223.45	206.9	142.9	176.55	141.575	120.475	0.205406	-0.379001	0.687387
Q96JJ7 [258-265]	0.638468	0.851426	0.939188	0.809694	0.154643	243.65	180.15	134.4	156.35	154.025	124.225	0.314957	-0.304552	0.501749
Q96K49 [65-73]	1.16009	0.834028	1.1655	1.05321	0.189834	48.8	213.2	140.3	56.95	186.8	172.533	0.867688	0.0747896	0.0616364
Q96NY8 [270-284]	0.935162	0.743218	0.798882	0.825754	0.0987533	205.5	229.425	191.25	194.5	170.575	156.15	0.0666415	-0.276216	1.17626
Q96PB1 [229-245]	0.446828	0.596659	0.638298	0.560595	0.100701	271.6	250.5	243.633	128.4	149.5	156.367	0.00134643	-0.83497	2.87082
Q96S52 [368-377]	0.473821	0.761615	0.689338	0.641591	0.14972	271.3	219.9	181.633	128.7	180.1	139.8	0.0697894	-0.640273	1.15621
Q99523 [96-109]	0.710648	0.818197	0.762311	0.763719	0.0537882	178.317	202.18	195.02	126.517	165.76	149.22	0.063426	-0.388887	1.19773
Q99538 [260-273]	0.850822	0.953652	0.864803	0.889759	0.055773	159.4	177.86	120.867	137.6	169.44	107.567	0.710568	-0.168513	0.148395
Q99571 [70-78]	1.78094	1.47765	1.83234	1.69698	0.191674	143.8	95.9	140.825	256.2	147.7	259.175	0.0756269	0.762968	1.12132
Q99985 [585-595]	0.652997	0.507314	0.55816	0.572824	0.0739404	239.42	200.65	217.84	160.58	97.7833	122.8	0.0182438	-0.803837	1.73889
Q99988 [69-87]	0.813008	0.74129	0.750751	0.76835	0.0389637	220.7	229.7	228.5	179.3	170.3	171.5	0.00457381	-0.380165	2.33972
Q9BRN9 [162-170]	0.750328	0.783699	0.754717	0.762915	0.018133	228	224.125	75.85	172	175.875	56.95	0.60601	-0.390406	0.21752
Q9BTY2 [375-391]	0.876808	1.11982	1.58144	1.19269	0.357925	211.9	187.75	154.8	188.1	212.25	245.2	0.173268	0.254221	0.761282
Q9BU23 [614-627]	0.685636	0.697837	0.708968	0.69748	0.0116703	237.225	235.55	233.575	162.775	164.45	166.425	0.000771531	-0.519775	3.11265
Q9BVX2 [181-190]	1.02249	0.913242	0.854214	0.929984	0.0853804	197.7	209.1	160.267	202.3	190.9	154.467	0.952324	-0.104723	0.0212154
Q9BYE2 [291-301]	0.966884	0.941841	0.892857	0.933861	0.0376532	183.825	205.775	169.2	179.725	194.225	150.833	0.752423	-0.0987204	0.123538
Q9BZC7 [1546-1564]	0.758869	0.87127	0.717154	0.782431	0.0797137	225.95	212.925	231.18	174.05	187.075	168.82	0.0329516	-0.353964	1.48212
Q9BZQ6 [190-204]	0.834028	0.704391	0.83717	0.791863	0.0757696	217.025	234.467	217.275	182.975	165.533	182.725	0.0101843	-0.336677	1.99207
Q9BZR6 [363-377]	0.858185	1.13895	0.862813	0.953317	0.160782	213.45	187	214.7	186.55	213	185.3	0.860275	-0.0689726	0.0653628
Q9C0C4 [416-427]	1.09051	0.430942	0.474608	0.665354	0.368845	191.4	189.95	271.3	208.6	73.9	128.7	0.21257	-0.587806	0.672497
Q9C0C4 [417-427]	0.349406	0.32077	0.370817	0.346998	0.0251102	255.325	228.525	260.8	90.975	74.075	95.975	0.000937137	-1.527	3.0282
Q9C0C4 [514-525]	0.496524	0.470699	0.53831	0.501844	0.0341179	267.3	271.9	260.033	132.7	128.1	139.967	4.78728e-05	-0.994688	4.31991
Q9GZU1 [152-168]	0.776398	0.821693	0.820008	0.806033	0.0256787	224.333	218.133	219.525	175.667	181.867	180.475	0.0108171	-0.31109	1.96589
Q9H0X4 [114-123]	0.74239	0.938967	1.0395	0.906953	0.15112	229.5	203.4	68.3	170.5	196.6	71	0.832856	-0.1409	0.0794302
Q9H0X4 [305-318]	0.793651	0.899955	0.949127	0.880911	0.0794683	222.267	210.317	204.12	177.733	189.683	195.88	0.14857	-0.182932	0.828069
Q9H0X4 [378-395]	0.604047	0.994777	0.821187	0.80667	0.195769	249.15	200.025	218.775	150.85	199.975	181.225	0.161711	-0.309949	0.79126
Q9H173 [192-202]	1.63934	1.04457	1.63845	1.44079	0.343136	150.3	161.4	116.8	249.7	165.9	190.8	0.0611689	0.526857	1.21347
Q9H330 [550-558]	2.10305	1.13443	1.59617	1.61122	0.484485	79.225	145.75	97.725	167.925	174.025	162.1	0.0203158	0.68815	1.69217
Q9H8M5 [105-117]	0.808081	0.62588	0.785546	0.739836	0.0993295	220.6	245.875	223.967	179.4	154.125	176.033	0.00800391	-0.434723	2.0967
Q9HAT2 [401-411]	1.49402	2.27531	1.4985	1.75595	0.44979	159.733	121.95	119.4	240.267	278.05	185.967	0.0180162	0.812249	1.74434
Q9HBA0 [644-661]	0.772798	0.795703	0.722543	0.763681	0.0374222	225.633	221.65	232.2	174.367	178.35	167.8	0.00953954	-0.388957	2.02047
Q9HC84 [1765-1783]	1.54321	1.10558	1.63666	1.42848	0.283518	157.4	189.5	151.8	242.6	210.5	248.2	0.00856129	0.514486	2.06746
Q9HC84 [4802-4817]	0.772798	0.862999	0.987411	0.874402	0.10776	224.75	213.35	199.5	175.25	186.65	200.5	0.196346	-0.193631	0.706977
Q9HC84 [791-817]	0.569801	0.804505	0.896057	0.756788	0.168281	254.8	221.7	211	145.2	178.3	189	0.0576837	-0.402039	1.23895
Q9HCN3 [228-240]	1.04895	1.36101	1.31883	1.24293	0.169308	192.067	141.15	111.15	207.933	188.55	144.525	0.22579	0.313743	0.646296
Q9HCN3 [529-545]	1.04932	0.841574	0.87241	0.921101	0.112105	194.675	216.7	213.35	205.325	183.3	186.65	0.461633	-0.118569	0.335703
Q9HDC9 [157-170]	1.7094	1.12613	1.13058	1.32204	0.335475	100.675	187.725	119.85	166.275	212.275	132.575	0.277066	0.402762	0.557416
Q9HDC9 [196-210]	0.782473	0.882613	0.796622	0.820569	0.0541949	204.664	211.983	209.04	159.036	188.017	167.26	0.0505756	-0.285303	1.29606
Q9NRB3 [277-289]	0.610687	0.56164	0.653381	0.608569	0.0459073	247.75	256.1	152.4	152.25	143.9	99.1	0.0652741	-0.716506	1.18526
Q9NWD8 [77-95]	0.715052	0.687876	0.747943	0.716957	0.0300788	233.25	236.45	228.65	166.75	163.55	171.35	0.000752391	-0.480041	3.12356
Q9NXG6 [345-358]	1.10011	1.18859	1.11029	1.133	0.0484136	190.175	182.667	149.6	209.825	217.333	167.7	0.118943	0.180143	0.924661
Q9NY97 [163-178]	0.82713	0.742528	0.915416	0.828358	0.0864502	178.25	229.4	205.34	150.3	170.6	194.66	0.297802	-0.271674	0.526073
Q9NYQ6 [1573-1589]	1.12824	1.21655	1.05895	1.13458	0.0789892	187.167	180.033	193.3	212.833	219.967	206.7	0.024426	0.182157	1.61215
Q9NYQ6 [1623-1629]	1.49477	1.46413	1.80668	1.58853	0.18955	112.2	70	52.9	168.1	101.3	96.35	0.160849	0.66769	0.793582
Q9NYQ6 [1630-1643]	0.975293	1.14811	0.674423	0.932607	0.239709	201.167	120.8	231.675	198.833	145.933	168.325	0.839368	-0.100659	0.0760476
Q9NZV5 [190-204]	0.883978	0.764331	0.93838	0.86223	0.0890391	212.1	226.6	205.433	187.9	173.4	194.567	0.0647416	-0.213856	1.18882
Q9P055 [37-51]	0.730327	0.745851	0.808734	0.761637	0.0415191	230.175	228.9	178.65	169.825	171.1	146.3	0.0309529	-0.392824	1.5093
Q9P0K1 [514-529]	1.08578	0.96432	0.958773	1.00296	0.0717778	191.8	203.6	204.3	208.2	196.4	195.7	0.424959	0.00425892	0.371653
Q9P0K1 [632-641]	0.938967	1.10254	0.860956	0.967486	0.123289	206.3	99.4	150.45	193.7	109.5	130.6	0.950101	-0.047687	0.0222302
Q9P0M6 [164-189]	1.24378	1.87441	1.18064	1.43294	0.383626	178.2	138.85	183.4	221.8	261.15	216.6	0.0300012	0.518983	1.52286
Q9P2B2 [286-293]	1.97368	2.00904	1.83374	1.93882	0.0927041	69.3667	61.55	141.133	126.6	120.85	258.867	0.215221	0.95518	0.667116
Q9UBG0 [64-76]	1.90295	1.95791	2.14592	2.00226	0.127414	85.25	134.95	126.575	146.45	265.05	273.425	0.0611817	1.00163	1.21338
Q9UBV2 [213-220]	2.06186	1.37221	1.06496	1.49968	0.510524	37.6	100.375	152.6	77.5	129.2	165.5	0.530317	0.584652	0.275464
Q9UBV2 [419-439]	1.27065	1.00756	0.830703	1.0363	0.221377	176.2	198	213.8	223.8	202	186.2	0.44471	0.0514452	0.351923
Q9UBV2 [601-613]	1.26183	1.02775	1.06667	1.11875	0.12543	115.675	145.35	148.7	139.8	150.575	148.3	0.323863	0.161886	0.489638
Q9UGT4 [158-165]	1.39795	1.67504	1.67015	1.58105	0.158585	129.333	103.8	129.3	174.933	172.825	214.05	0.0210124	0.660879	1.67752
Q9UGT4 [487-499]	1.15848	1.09938	1.10302	1.1203	0.0331187	183.48	173.56	144.9	216.52	188.88	161.8	0.144646	0.163879	0.839694
Q9UGV2 [346-367]	0.881057	0.733676	0.609385	0.741373	0.136	212.7	230.7	248.5	187.3	169.3	151.5	0.0388172	-0.431729	1.41098
Q9UH99 [632-644]	1.59681	1.47874	1.51803	1.53119	0.0601227	153.45	121.65	134.55	246.55	176.6	209.525	0.0221971	0.614655	1.6537
Q9UIQ6 [440-455]	1.38169	1.1549	1.24185	1.25948	0.114419	166.363	185.15	153.562	233.637	214.85	189.513	0.0105439	0.33283	1.977
Q9UJ14 [197-206]	0.705716	0.817661	0.712251	0.74521	0.0628303	234.5	220	233.6	165.5	180	166.4	0.0103858	-0.424282	1.98356
Q9UJ14 [521-537]	1.08755	1.5456	1.20956	1.2809	0.237212	135.55	156.4	180.575	165.125	243.6	219.425	0.121473	0.357157	0.91552
Q9UKY4 [579-588]	1.19261	1.05597	1.24275	1.16377	0.0966724	182.35	166.6	90.8333	217.65	175.325	113.667	0.488108	0.218811	0.311484
Q9ULL4 [891-907]	0.693001	0.638298	0.702412	0.677903	0.0346206	234.5	244.067	234.767	165.5	155.933	165.233	0.000556022	-0.560848	3.25491
Q9UMR5 [203-211]	0.932836	0.913242	0.893056	0.913045	0.0198904	200.3	192.625	147.3	199.7	177.75	137.875	0.952844	-0.131242	0.0209783
Q9UMR5 [276-290]	0.585138	0.764965	0.734394	0.694832	0.0962201	167	193.975	230.633	101.8	147.5	169.367	0.181058	-0.525264	0.742183
Q9UN73 [251-263]	0.615764	0.519548	0.681044	0.605452	0.0812404	246.6	263.175	237.867	153.4	136.825	162.133	0.000657755	-0.723916	3.18194
Q9UN76 [167-180]	0.789578	0.880863	0.803428	0.824623	0.0491954	223.5	176.675	132	176.5	156.975	104.067	0.462266	-0.278194	0.335108
Q9Y2E5 [741-753]	0.755097	0.825934	0.62461	0.735214	0.102125	227.4	218.725	243.767	172.6	181.275	156.233	0.0249336	-0.443765	1.60321
Q9Y2G5 [257-266]	0.889416	0.778059	0.641128	0.769534	0.124363	159.567	187.475	200.25	138.333	142.15	131.85	0.0654609	-0.377942	1.18402
Q9Y487 [501-510]	1.01859	1.06952	0.99167	1.02659	0.0395367	197.2	192.733	170.34	202.8	207.267	169.28	0.275542	0.0378638	0.559812
Q9Y4L1 [510-520]	1.28783	0.759013	1.27186	1.10623	0.300808	112.825	139.3	126.775	136.1	122.75	166	0.278867	0.145657	0.554603
Q9Y4L1 [595-613]	2.08768	1.45666	1.73611	1.76015	0.316195	128.95	161.725	111.05	271.05	238.275	201.15	0.00614235	0.815701	2.21167
Q9Y4L1 [869-877]	1.71453	1.65289	2.02122	1.79622	0.197284	135	120.6	104.775	265	198.4	215.525	0.00481054	0.84496	2.31781
Q9Y4L1 [926-940]	1.628	1.12613	1.43062	1.39491	0.252835	106.225	98.375	99.725	162.275	112.075	140.4	0.05016	0.480176	1.29964
Q9Y5Y6 [770-787]	0.770515	0.7768	0.87127	0.806195	0.0564442	224.95	224.267	213.45	175.05	175.733	186.55	0.00788917	-0.3108	2.10297
Q9Y639 [196-204]	1.59337	1.60471	1.5534	1.58383	0.0269537	87.92	109.517	67.375	141.44	170.9	102.388	0.0627204	0.663413	1.20259
Q9Y639 [228-235]	1.41443	1.1491	1.51362	1.35905	0.188468	165.6	113.225	158.9	234.4	137.85	241.1	0.177241	0.442597	0.751436
Q9Y639 [275-288]	0.777269	0.732839	0.791139	0.767083	0.0304556	223.522	229.567	194.486	176.478	170.433	153.357	0.00370624	-0.382546	2.43107
Q9Y653 [303-311]	1.41643	1.06866	1.08932	1.19147	0.195093	165.6	192.375	151.1	234.4	207.625	164.4	0.116415	0.252745	0.933991

## Sheet: Altered
Glycopeptide	117/115-R1	117/115-R2	117/115-R3	AVERAGE	SD	115-R1	115-R2	115-R3	117-R1	117-R2	117-R3	P-value	log2（Fold）	-LOG10(P)
O14672 [439-446]	2.69724	1.67224	2.25352	2.20767	0.514034	107.875	149.6	122.1	292.125	250.4	277.9	0.000728786	1.14252	3.1374
O15118 [959-978]	0.648789	0.660066	0.683177	0.664011	0.01753	242.567	239.025	191.175	157.433	160.975	131.475	0.0074311	-0.590722	2.12895
O15230 [3106-3123]	0.607995	0.547046	0.674764	0.609935	0.063881	248.525	257.333	237.5	151.475	142.667	162.5	0.000355232	-0.713273	3.44949
O15342 [70-77]	2.21239	1.3089	1.54719	1.68949	0.468253	123.75	171.233	156.767	276.25	228.767	243.233	0.00520094	0.75659	2.28392
O15394 [473-484]	0.379903	0.395961	0.420239	0.398701	0.0203069	289.825	286.475	280.22	110.175	113.525	119.78	2.7073e-05	-1.32662	4.56746
O60637 [125-136]	1.93424	1.96947	1.99402	1.96591	0.0300499	136.3	134.65	133.5	263.7	265.35	266.5	1.4828e-05	0.975197	4.82892
O75477 [106-113]	2.25479	1.66251	2.17155	2.02962	0.320637	81.15	98.275	104.45	191.35	176.375	208.05	0.00201294	1.02121	2.69617
O75503 [201-215]	0.541712	0.473934	0.63012	0.548588	0.0783198	259.5	271.4	245.4	140.5	128.6	154.6	0.000302891	-0.866204	3.51871
O95196 [349-360]	0.648088	0.57554	0.686577	0.636735	0.0563828	241.6	253.65	237.05	158.4	146.35	162.95	0.000399138	-0.651235	3.39888
P01011 [268-283]	1.41393	1.64474	1.49254	1.51707	0.117344	164.5	151.3	160.3	235.5	248.7	239.7	0.000501736	0.601285	3.29953
P02786 [721-732]	0.637697	0.634786	0.702521	0.658335	0.0382942	238.729	199.733	181.867	161.271	126.033	129.344	0.0250584	-0.603107	1.60105
P05026 [153-170]	1.60171	1.51286	1.57778	1.56412	0.0459743	149.367	159.2	126.04	250.633	240.8	215.56	0.000492541	0.645349	3.30756
P05362 [259-273]	1.69014	1.97922	1.30919	1.65952	0.336064	148.1	134	171.7	251.9	266	228.3	0.00417351	0.730762	2.3795
P05556 [403-414]	1.79166	1.9025	1.96188	1.88535	0.0864001	72.1286	75.0875	69.6714	131.757	149.65	139.829	0.000250208	0.914829	3.6017
P06213 [697-714]	2.41838	1.26502	1.33156	1.67165	0.647539	116.9	176.6	171.5	283.1	223.4	228.5	0.02154	0.741276	1.66676
P06731 [645-664]	0.527816	0.832408	0.609703	0.656642	0.157628	259.2	216.033	248.3	140.8	183.967	151.7	0.025069	-0.60682	1.60086
P06756 [73-88]	1.55945	1.91847	2.0284	1.83544	0.245249	151.825	137.05	100.725	248.175	262.95	200.95	0.0050774	0.876125	2.29436
P06756 [865-883]	1.87793	1.79856	2.53968	2.07206	0.406914	114.225	97.875	63.675	210.525	156.6	152.925	0.0156158	1.05107	1.80644
P07942 [1271-1283]	4.0201	3.35852	3.36134	3.57999	0.38115	69.525	78.55	68.125	274.475	264.25	224.125	0.000118178	1.83996	3.92746
P07996 [1065-1077]	0.536769	0.453001	0.515929	0.5019	0.0436105	259.85	274.625	263.075	140.15	125.375	136.925	0.000108445	-0.994529	3.96479
P08069 [223-252]	0.674006	0.494438	0.521921	0.563455	0.0967212	238.7	265.75	262.35	161.3	134.25	137.65	0.00184951	-0.827628	2.73294
P08069 [741-753]	0.528262	0.441891	0.438212	0.469455	0.0509615	257.1	277.133	277.9	142.9	122.867	122.1	0.000517608	-1.09094	3.286
P08195 [417-429]	0.469043	0.551694	0.594682	0.538473	0.0638542	216.82	234.72	168.829	118.72	139.26	110.286	0.00841947	-0.893054	2.07472
P10909 [82-89]	1.38504	1.7316	1.64024	1.58563	0.179619	167.25	106.4	151.533	232.75	187	248.467	0.0373087	0.665054	1.42819
P11117 [87-97]	0.567376	0.554939	0.434783	0.519032	0.073227	214.825	257.2	278.55	120.35	142.8	121.45	0.00940098	-0.946103	2.02683
P13674 [105-118]	0.624545	0.619771	0.645057	0.629791	0.0134348	212.8	246.825	226.8	130.9	153.175	146.475	0.00301054	-0.667055	2.52136
P13726 [155-163]	1.73611	1.59236	1.85357	1.72735	0.130826	146.2	154.3	140.2	253.8	245.7	259.8	8.40846e-05	0.788557	4.07528
P16422 [109-125]	0.540394	0.579151	0.679925	0.599823	0.0720259	259.7	252.267	237.6	140.3	147.733	162.4	0.000652745	-0.73739	3.18526
P18564 [459-466]	3.11526	3.98804	2.39617	3.16649	0.79717	65.65	71.775	61.3667	201.6	277	152.833	0.0135177	1.66288	1.8691
P18564 [567-594]	4.0282	3.29489	2.3166	3.21323	0.858715	75	91.45	120.2	325	308.55	279.8	0.000301061	1.68402	3.52135
P22223 [563-570]	2.12879	1.63934	1.81488	1.86101	0.247962	127.775	125.4	120.3	272.225	204.375	213.525	0.00487848	0.896083	2.31172
P23470 [433-447]	0.483247	0.434405	0.537057	0.484903	0.0513461	268.233	277.25	260.2	131.767	122.75	139.8	5.75378e-05	-1.04423	4.24005
P25106 [185-197]	0.582524	0.618047	0.707047	0.635873	0.0641466	252.367	247	234	147.633	152	166	0.000690113	-0.65319	3.16108
P32004 [668-678]	2.78164	2.2818	1.78359	2.28234	0.499025	105.25	66.85	137.867	294.75	155.125	262.133	0.0460577	1.19052	1.3367
P35052 [61-80]	0.594001	0.231535	0.713946	0.51316	0.25116	250.95	324.8	233.067	149.05	75.2	166.933	0.0230389	-0.962518	1.63754
P36941 [172-184]	0.553403	0.595238	0.691802	0.613481	0.07098	257.5	250.7	235.75	142.5	149.3	164.25	0.000731343	-0.704909	3.13588
P48960 [105-125]	1.72117	0.971345	2.11954	1.60402	0.582994	146.45	202.25	127.7	253.55	197.75	272.3	0.0401424	0.681691	1.3964
P51689 [115-134]	0.469778	0.515597	0.515597	0.500324	0.0264537	271.067	262.95	263.8	128.933	137.05	136.2	0.000132479	-0.999066	3.87785
P52798 [28-38]	0.614628	0.568289	0.688863	0.623927	0.0608224	247.7	254.9	236.467	152.3	145.1	163.533	0.000351653	-0.680551	3.45389
P55268 [1347-1365]	0.575788	0.532836	0.592944	0.567189	0.0309628	253.45	259.575	249.825	146.55	140.425	150.175	0.00010488	-0.818098	3.97931
P78536 [585-601]	2.149	1.6632	1.68919	1.8338	0.273281	112.867	149.7	147.986	242.9	250.3	252.014	0.00119374	0.874833	2.92309
Q02487 [627-634]	0.565718	0.520698	0.679002	0.588472	0.0815683	181.667	211.65	195.05	101.133	107.55	144.3	0.014807	-0.764953	1.82953
Q03405 [221-238]	1.54261	1.45773	1.50943	1.50326	0.04278	156.825	162.567	127.05	243.175	237.433	193.35	0.00512016	0.588093	2.29072
Q07954 [110-117]	2.34192	1.8797	2.34742	2.18968	0.268465	82	138.9	119.5	180.5	261.1	280.5	0.0226577	1.13072	1.64479
Q07954 [3831-3842]	1.7762	1.56311	2.04221	1.79384	0.240034	144.1	137.15	101.467	255.9	214.175	204.267	0.00361073	0.84305	2.44241
Q07954 [4357-4369]	1.82482	2.25734	3.0722	2.38478	0.63338	140	122.9	97.9	260	277.1	302.1	0.000888184	1.25386	3.0515
Q08380 [118-128]	1.58856	1.82149	2.32378	1.91128	0.375742	154.25	141.35	94.1667	245.75	258.65	211.333	0.00381473	0.934538	2.41854
Q08380 [542-554]	2.8715	2.89575	2.56082	2.77602	0.186767	103.25	102.633	111.8	296.75	297.367	288.2	5.87039e-06	1.47302	5.23133
Q12913 [141-150]	1.92123	1.67926	1.96754	1.85601	0.154809	86.1	148.675	113.15	157.75	251.325	224.475	0.0387566	0.892204	1.41165
Q12913 [341-363]	0.664746	0.513018	0.722804	0.633523	0.108323	239.9	263.375	230.7	160.1	136.625	169.3	0.00256807	-0.658531	2.59039
Q12913 [98-112]	1.97628	1.25392	2.09351	1.77457	0.454692	134.3	173.1	129.3	265.7	226.9	270.7	0.00339357	0.82747	2.46934
Q13641 [114-129]	0.428954	0.48528	0.540833	0.485022	0.0559397	277.075	263.7	258.733	122.925	136.3	141.267	0.000214684	-1.04388	3.6682
Q14118 [641-652]	0.680504	0.59356	0.584795	0.61962	0.0529089	237.95	218	250.65	162.05	130.7	149.35	0.0112973	-0.690545	1.94702
Q14126 [459-468]	1.81736	1.34725	1.38648	1.51703	0.260827	85.9	120	102.775	145.875	167.925	142.075	0.0103711	0.60125	1.98418
Q14643 [2507-2519]	3.84615	2.31839	2.6455	2.93668	0.804427	82.5	117.967	69.1	317.5	282.033	178.45	0.0130882	1.55419	1.88312
Q29983 [214-226]	0.677354	0.478469	0.616428	0.59075	0.101899	238.3	217.125	212.5	161.7	111.025	130.1	0.00729046	-0.75938	2.13724
Q3MIR4 [142-152]	0.605327	0.522375	0.824063	0.650588	0.155853	207.35	262.433	218.35	127.575	137.567	181.65	0.0361559	-0.620183	1.44182
Q3MIR4 [285-294]	0.554324	0.629327	0.633714	0.605788	0.0446233	257.4	245.5	216.4	142.6	154.5	136.55	0.000513461	-0.723115	3.28949
Q5JRA6 [248-260]	2.13675	1.07836	1.85759	1.6909	0.548531	127.4	192.4	121.95	272.6	207.6	234.45	0.0192069	0.757791	1.71654
Q6EMK4 [112-121]	0.65136	0.621118	0.573806	0.615428	0.0390888	200.525	246.8	232.9	129.025	153.2	135.75	0.00801114	-0.700338	2.09631
Q6UXH1 [249-275]	3.09598	3.11769	2.65756	2.95707	0.259619	96.15	79.775	107.914	303.85	262.45	292.086	0.00029885	1.56417	3.52455
Q6YHK3 [110-121]	1.78784	5.72082	1.47275	2.99381	2.36691	143.433	58.5	161.35	256.567	341.5	238.65	0.0232161	1.58198	1.63421
Q7Z7H5 [100-120]	0.50163	0.449236	0.533049	0.494639	0.0423416	266	276	260.8	134	124	139.2	5.73729e-05	-1.01555	4.24129
Q8NFQ8 [284-302]	0.568505	0.677966	0.624298	0.62359	0.0547341	254.4	238.4	245.68	145.6	161.6	154.32	0.00135409	-0.681331	2.86835
Q8WVQ1 [79-98]	0.687285	0.642674	0.660066	0.663342	0.0224855	236.44	243.5	240.72	163.56	156.5	159.28	0.000592064	-0.592176	3.22763
Q92673 [1602-1609]	2.32829	1.67574	2.16606	2.0567	0.339742	71.65	95.475	42.7667	172.05	153.4	94.2333	0.0457047	1.04033	1.34004
Q92896 [209-222]	1.9685	2.43902	1.9305	2.11268	0.283263	134.8	116.2	136.5	265.2	283.8	263.5	0.000194868	1.07907	3.71026
Q969V3 [425-432]	2.1645	1.25261	1.20773	1.54161	0.539904	126.5	174.833	176.2	273.5	225.167	223.8	0.0182999	0.624441	1.73755
Q96AY3 [67-77]	1.80505	1.47547	1.65289	1.64447	0.164953	142.45	114.3	121.35	257.55	168.775	200.975	0.0287482	0.717625	1.54139
Q96FM1 [31-50]	1.78253	1.51469	1.44196	1.57973	0.179358	115.05	132.62	157.75	203.5	197.46	242.25	0.0212197	0.659676	1.67326
Q96PB1 [229-245]	0.446828	0.596659	0.638298	0.560595	0.100701	271.6	250.5	243.633	128.4	149.5	156.367	0.00134643	-0.83497	2.87082
Q99985 [585-595]	0.652997	0.507314	0.55816	0.572824	0.0739404	239.42	200.65	217.84	160.58	97.7833	122.8	0.0182438	-0.803837	1.73889
Q9C0C4 [417-427]	0.349406	0.32077	0.370817	0.346998	0.0251102	255.325	228.525	260.8	90.975	74.075	95.975	0.000937137	-1.527	3.0282
Q9C0C4 [514-525]	0.496524	0.470699	0.53831	0.501844	0.0341179	267.3	271.9	260.033	132.7	128.1	139.967	4.78728e-05	-0.994688	4.31991
Q9H330 [550-558]	2.10305	1.13443	1.59617	1.61122	0.484485	79.225	145.75	97.725	167.925	174.025	162.1	0.0203158	0.68815	1.69217
Q9HAT2 [401-411]	1.49402	2.27531	1.4985	1.75595	0.44979	159.733	121.95	119.4	240.267	278.05	185.967	0.0180162	0.812249	1.74434
Q9UGT4 [158-165]	1.39795	1.67504	1.67015	1.58105	0.158585	129.333	103.8	129.3	174.933	172.825	214.05	0.0210124	0.660879	1.67752
Q9UH99 [632-644]	1.59681	1.47874	1.51803	1.53119	0.0601227	153.45	121.65	134.55	246.55	176.6	209.525	0.0221971	0.614655	1.6537
Q9UN73 [251-263]	0.615764	0.519548	0.681044	0.605452	0.0812404	246.6	263.175	237.867	153.4	136.825	162.133	0.000657755	-0.723916	3.18194
Q9Y4L1 [595-613]	2.08768	1.45666	1.73611	1.76015	0.316195	128.95	161.725	111.05	271.05	238.275	201.15	0.00614235	0.815701	2.21167
Q9Y4L1 [869-877]	1.71453	1.65289	2.02122	1.79622	0.197284	135	120.6	104.775	265	198.4	215.525	0.00481054	0.84496	2.31781
