# Supplementary material for: Site-specific characterization and quantitation ofN-glycopeptides in PKM2 knockout breast cancer cells using DiLeu isobaric tags enabled by electron-transfer/higher-energy collision dissociation (EThcD)
Source: Royal Society of Chemistry journal article supplement (doi:10.1039/c8an00216a), 2018-01-01
Supplement: c8an00216a5.xlsx [file c8an00216a5.xlsx]

## Sheet: KEGG Pathway
Category	Term	Count	%	PValue	-LOG10(P Value)	Genes	List Total	Pop Hits	Pop Total	Fold Enrichment	Bonferroni	Benjamini	FDR
KEGG_PATHWAY	hsa04512:ECM-receptor interaction	8	11.4286	4.36e-07	6.36051	P06756, O15230, P18564, P05556, P07942, P07996, P55268, Q14118	40	87	6910	15.8851	4.92668e-05	4.92668e-05	4.95046e-06
KEGG_PATHWAY	hsa05412:Arrhythmogenic right ventricular cardiomyopathy (ARVC)	6	8.57143	4.35911e-05	4.3606	P06756, P18564, P05556, Q02487, Q14126, Q14118	40	71	6910	14.5986	0.00491379	0.00245992	0.000494834
KEGG_PATHWAY	hsa04151:PI3K-Akt signaling pathway	10	14.2857	9.70867e-05	4.01284	P08069, P06756, O15230, P18564, P05556, P07942, P52798, P06213, P07996, P55268	40	345	6910	5.00725	0.0109114	0.00365043	0.0011018
KEGG_PATHWAY	hsa04514:Cell adhesion molecules (CAMs)	7	10	0.000126418	3.89819	O15394, P06756, P05556, Q92896, P05362, P32004, P22223	40	142	6910	8.51585	0.0141845	0.00356515	0.00143444
KEGG_PATHWAY	hsa04510:Focal adhesion	8	11.4286	0.000129099	3.88908	P08069, P06756, O15230, P18564, P05556, P07942, P07996, P55268	40	206	6910	6.70874	0.0144832	0.00291357	0.00146485
KEGG_PATHWAY	hsa05205:Proteoglycans in cancer	7	10	0.00080148	3.09611	P08069, P06756, P05556, P35052, P07996, Q14643, Q03405	40	200	6910	6.04625	0.0866203	0.0149872	0.00906258

## Sheet: Cellular Component
Category	Term	Count	%	PValue	-LOG10(P Value)	Genes	List Total	Pop Hits	Pop Total	Fold Enrichment	Bonferroni	Benjamini	FDR
GOTERM_CC_DIRECT	GO:0070062~extracellular exosome	41	58.5714	6.32605e-16	15.1989	Q99985, O60637, P35052, P48960, Q92673, P01011, P11117, P16422, P18564, P06756, P08195, P13726, Q7Z7H5, P07942, P06213, P07996, Q14118, P23470, Q6EMK4, Q9HAT2, P05026, O75503, Q9UGT4, P05556, P02786, Q92896, Q02487, Q12913, P05362, Q8WVQ1, O14672, Q03405, P55268, P06731, O15230, Q14126, P10909, O15118, Q08380, P51689, Q9Y4L1	70	2811	18224	3.79725	1.05249e-13	1.05249e-13	7.99361e-15
GOTERM_CC_DIRECT	GO:0009986~cell surface	20	28.5714	8.39375e-14	13.076	P05556, P02786, Q12913, P05362, Q29983, P32004, Q13641, O14672, Q6YHK3, P16422, P78536, O95196, P06756, P08195, Q14126, P10909, P13726, P25106, P07996, Q6EMK4	70	542	18224	9.60675	1.32614e-11	6.6307e-12	1.0113e-12
GOTERM_CC_DIRECT	GO:0005887~integral component of plasma membrane	24	34.2857	9.19727e-10	9.03634	P02786, Q12913, P05362, O60637, Q29983, Q13641, P36941, Q9UN73, P35052, Q03405, P48960, Q92673, P16422, P78536, P08069, P06731, Q07954, O95196, P06756, Q9H330, O15118, P52798, P06213, P23470	70	1415	18224	4.41571	1.45317e-07	4.84389e-08	1.10817e-08
GOTERM_CC_DIRECT	GO:0016021~integral component of membrane	43	61.4286	1.69667e-08	7.7704	Q3MIR4, O60637, O75477, Q14643, Q92673, Q9C0C4, P11117, P16422, P08195, P13726, P25106, Q7Z7H5, Q5JRA6, P22223, O15342, Q14118, Q8NFQ8, P23470, Q6EMK4, O75503, Q9UGT4, Q969V3, P02786, Q92896, Q02487, Q12913, P05362, P32004, Q8WVQ1, Q29983, O14672, Q03405, P78536, P08069, Q07954, O95196, O15394, Q14126, Q9H330, O15118, Q96FM1, P51689, Q96PB1	70	5163	18224	2.16826	2.68073e-06	6.70184e-07	2.0443e-07
GOTERM_CC_DIRECT	GO:0016020~membrane	27	38.5714	4.38066e-08	7.35846	Q14643, P48960, Q92673, P11117, Q9C0C4, P06756, P08195, P06213, Q5JRA6, O15342, P22223, Q14118, P05026, P05556, Q969V3, P02786, Q92896, P05362, Q8WVQ1, O14672, P78536, P08069, O95196, P13674, O15118, Q08380, Q9Y4L1	70	2200	18224	3.19512	6.92141e-06	1.38429e-06	5.27822e-07
GOTERM_CC_DIRECT	GO:0005615~extracellular space	21	30	7.15382e-08	7.14546	Q99985, P02786, P05362, Q29983, P35052, Q6YHK3, P48960, Q92673, P01011, Q9C0C4, Q6UXH1, O15230, P10909, P13726, P07942, Q08380, P07996, Q14118, Q9HAT2, Q6EMK4, P23470	70	1347	18224	4.0588	1.1303e-05	1.88384e-06	8.61959e-07
GOTERM_CC_DIRECT	GO:0005925~focal adhesion	12	17.1429	2.30352e-07	6.63761	Q07954, P06756, P18564, P05556, P05362, P32004, O14672, Q9Y4L1, P48960, Q03405, Q14118, P78536	70	391	18224	7.99006	3.6395e-05	5.19937e-06	2.7755e-06
GOTERM_CC_DIRECT	GO:0005886~plasma membrane	35	50	1.05716e-06	5.97586	Q3MIR4, P35052, Q6YHK3, Q14643, P48960, P16422, P18564, P06756, P08195, P13726, P25106, P06213, P22223, Q14118, Q6EMK4, P05026, Q9UGT4, P05556, P02786, Q92896, Q02487, Q12913, P05362, P32004, Q8WVQ1, Q29983, P36941, O14672, Q03405, P78536, P08069, Q07954, O15394, Q14126, P52798	70	4121	18224	2.21111	0.000167017	2.08787e-05	1.27376e-05
GOTERM_CC_DIRECT	GO:0005783~endoplasmic reticulum	12	17.1429	0.000260426	3.58432	O75503, Q6UXH1, P13674, P10909, Q13641, O75477, O15118, P07996, Q9Y4L1, Q14643, Q92673, Q8NFQ8	70	828	18224	3.77308	0.0403174	0.00456208	0.00313335
GOTERM_CC_DIRECT	GO:0014704~intercalated disc	4	5.71429	0.000657776	3.18192	P05556, Q02487, Q14126, P05026	70	45	18224	23.1416	0.0987411	0.0103424	0.00789676
GOTERM_CC_DIRECT	GO:0005788~endoplasmic reticulum lumen	6	8.57143	0.000802157	3.09574	P13674, Q96AY3, P07996, Q9Y4L1, P51689, Q03405	70	192	18224	8.13571	0.119083	0.0114603	0.00962241

## Sheet: Biology process
Category	Term	Count	%	PValue		Genes	List Total	Pop Hits	Pop Total	Fold Enrichment	Bonferroni	Benjamini	FDR
GOTERM_BP_DIRECT	GO:0007155~cell adhesion	18	25.7143	1.89796e-12	11.7217	Q02487, P05362, P32004, Q13641, Q9UN73, P55268, P48960, P78536, O15394, P06756, P18564, Q14126, P07942, P25106, Q08380, P07996, P22223, P05026	68	459	16792	9.68397	1.22986e-09	1.22986e-09	2.83261e-11
GOTERM_BP_DIRECT	GO:0030335~positive regulation of cell migration	11	15.7143	2.82105e-09	8.54959	P08069, P06756, Q99985, P13726, Q9UH99, P07942, O14672, P06213, P07996, P78536, Q9C0C4	68	184	16792	14.7628	1.82804e-06	9.14021e-07	4.21035e-08
GOTERM_BP_DIRECT	GO:0033627~cell adhesion mediated by integrin	5	7.14286	3.05655e-07	6.51477	P06756, P18564, P05556, P05362, P78536	68	15	16792	82.3137	0.000198045	6.60194e-05	4.56182e-06
GOTERM_BP_DIRECT	GO:0046718~viral entry into host cell	7	10	7.6534e-07	6.11615	P06756, P18564, P05556, P02786, P05362, O15118, Q14118	68	80	16792	21.6074	0.000495817	0.000123977	1.14224e-05
GOTERM_BP_DIRECT	GO:0030198~extracellular matrix organization	9	12.8571	1.08064e-06	5.96632	P06756, O15230, P18564, P05556, P05362, P07942, P07996, P55268, Q14118	68	196	16792	11.3391	0.000700013	0.000140042	1.61282e-05
GOTERM_BP_DIRECT	GO:0050900~leukocyte migration	7	10	9.03227e-06	5.0442	P06756, P05556, P08195, Q92896, P05362, P32004, P05026	68	122	16792	14.1688	0.00583584	0.000975014	0.000134796
GOTERM_BP_DIRECT	GO:0007229~integrin-mediated signaling pathway	5	7.14286	0.000655488	3.18344	P06756, O15230, P18564, P05556, O14672	68	99	16792	12.4718	0.346162	0.0588939	0.00973847
